# Supplementary material for: Stereoselective synthesis of medium lactams enabled by metal-free hydroalkoxylation/stereospecific [1,3]-rearrangement
Source: PubMed Central journal article supplement (PMC6642132; doi:10.1038/s41467-019-11245-2), 2019-07-19
Supplement: 41467_2019_11245_MOESM2_ESM.pdf [file 41467_2019_11245_MOESM2_ESM.pdf]

**Diastereo- and enantioselective synthesis of medium lactams enabled by  
metal-free hydroalkoxylation/stereospecific [1,3]-rearrangement**

**Zhou et al.**

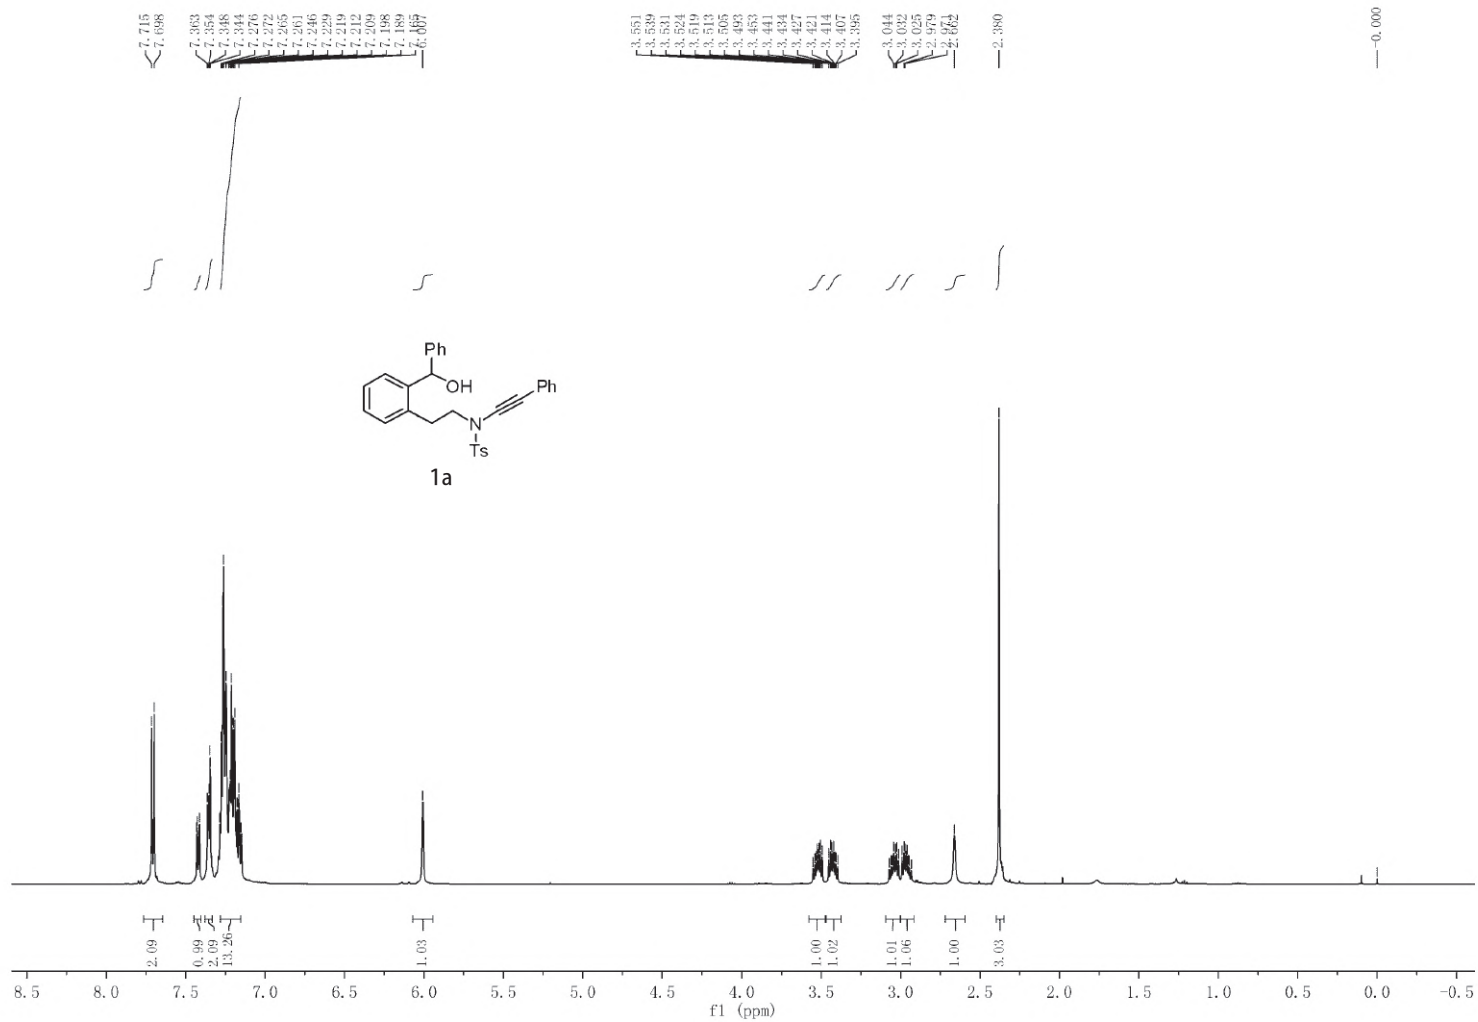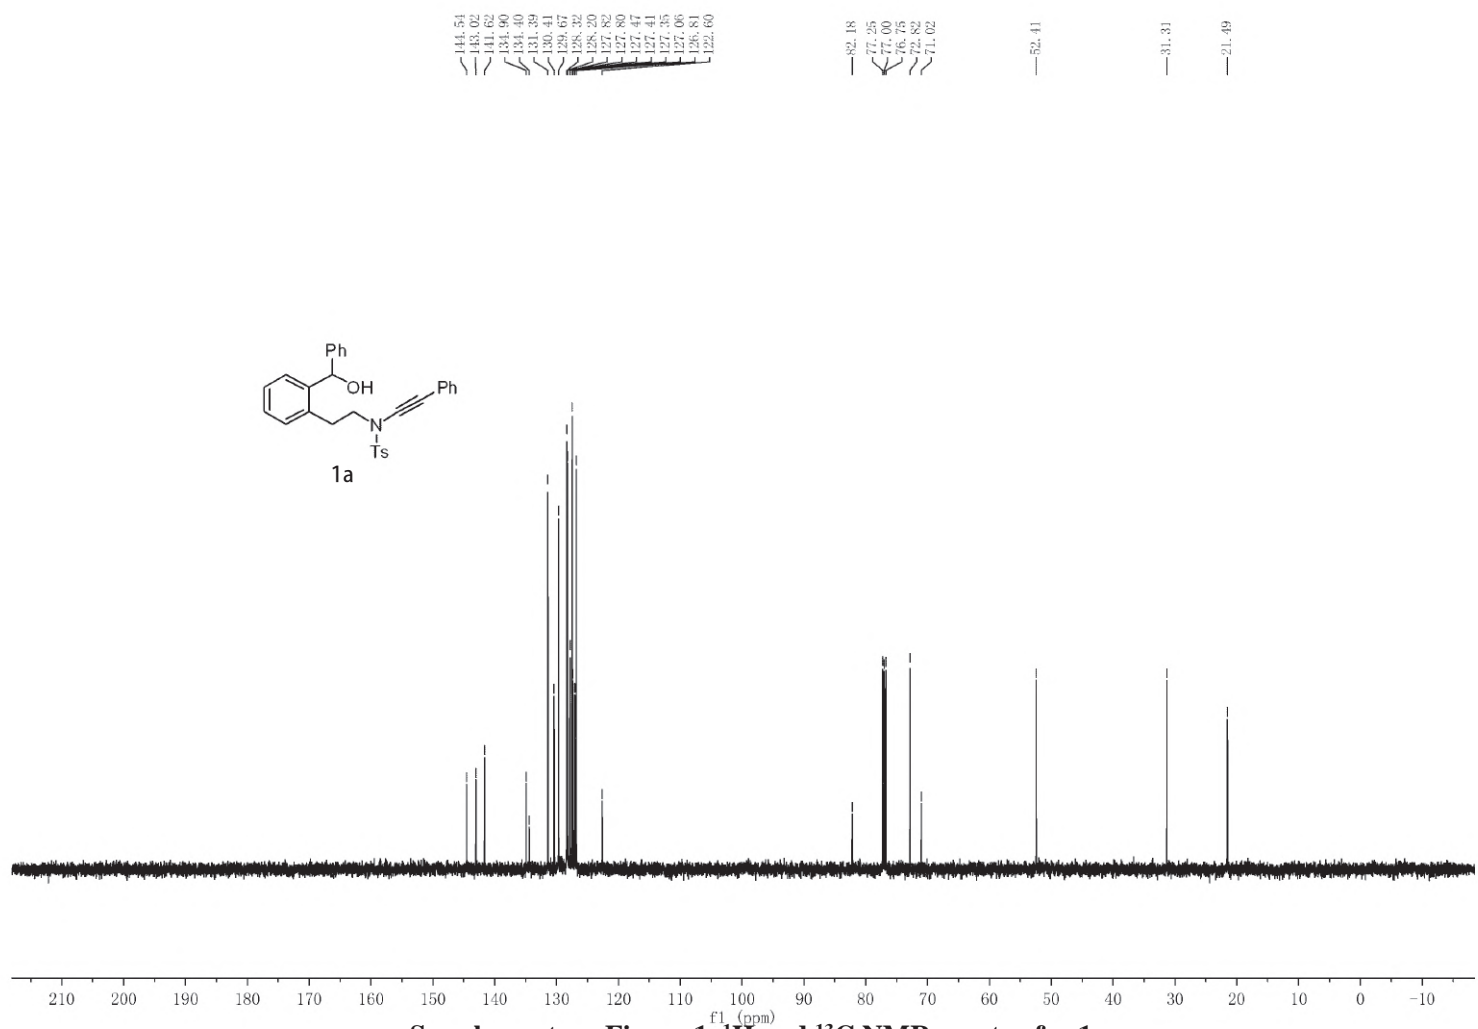

Supplementary Figure 1. <sup>1</sup>H and <sup>13</sup>C NMR spectra for 1a

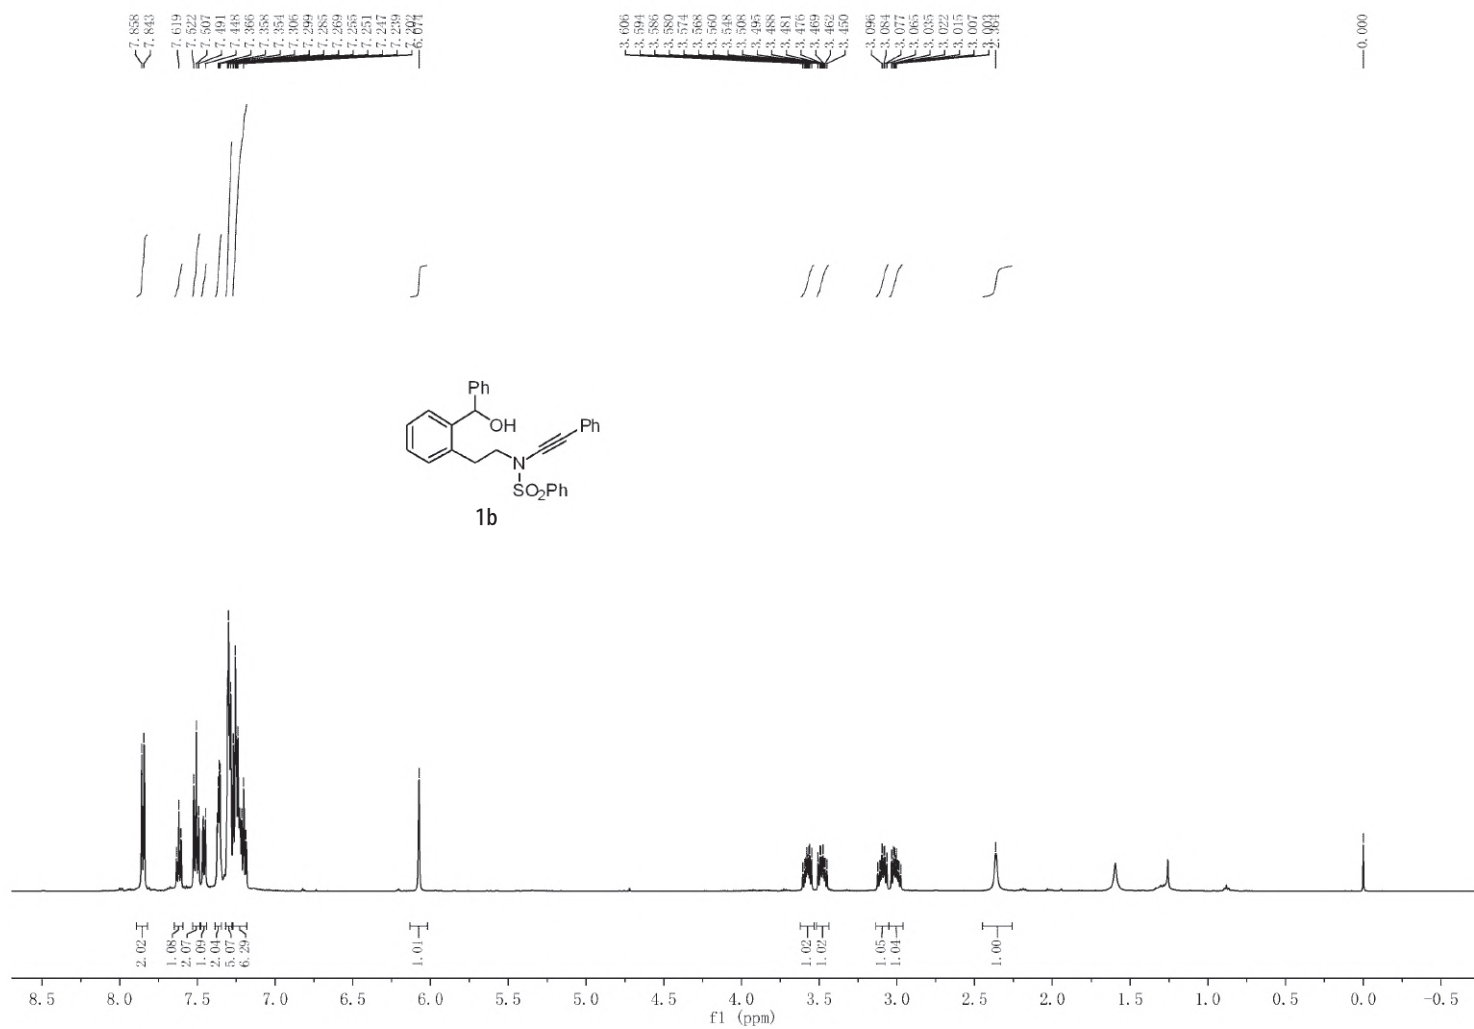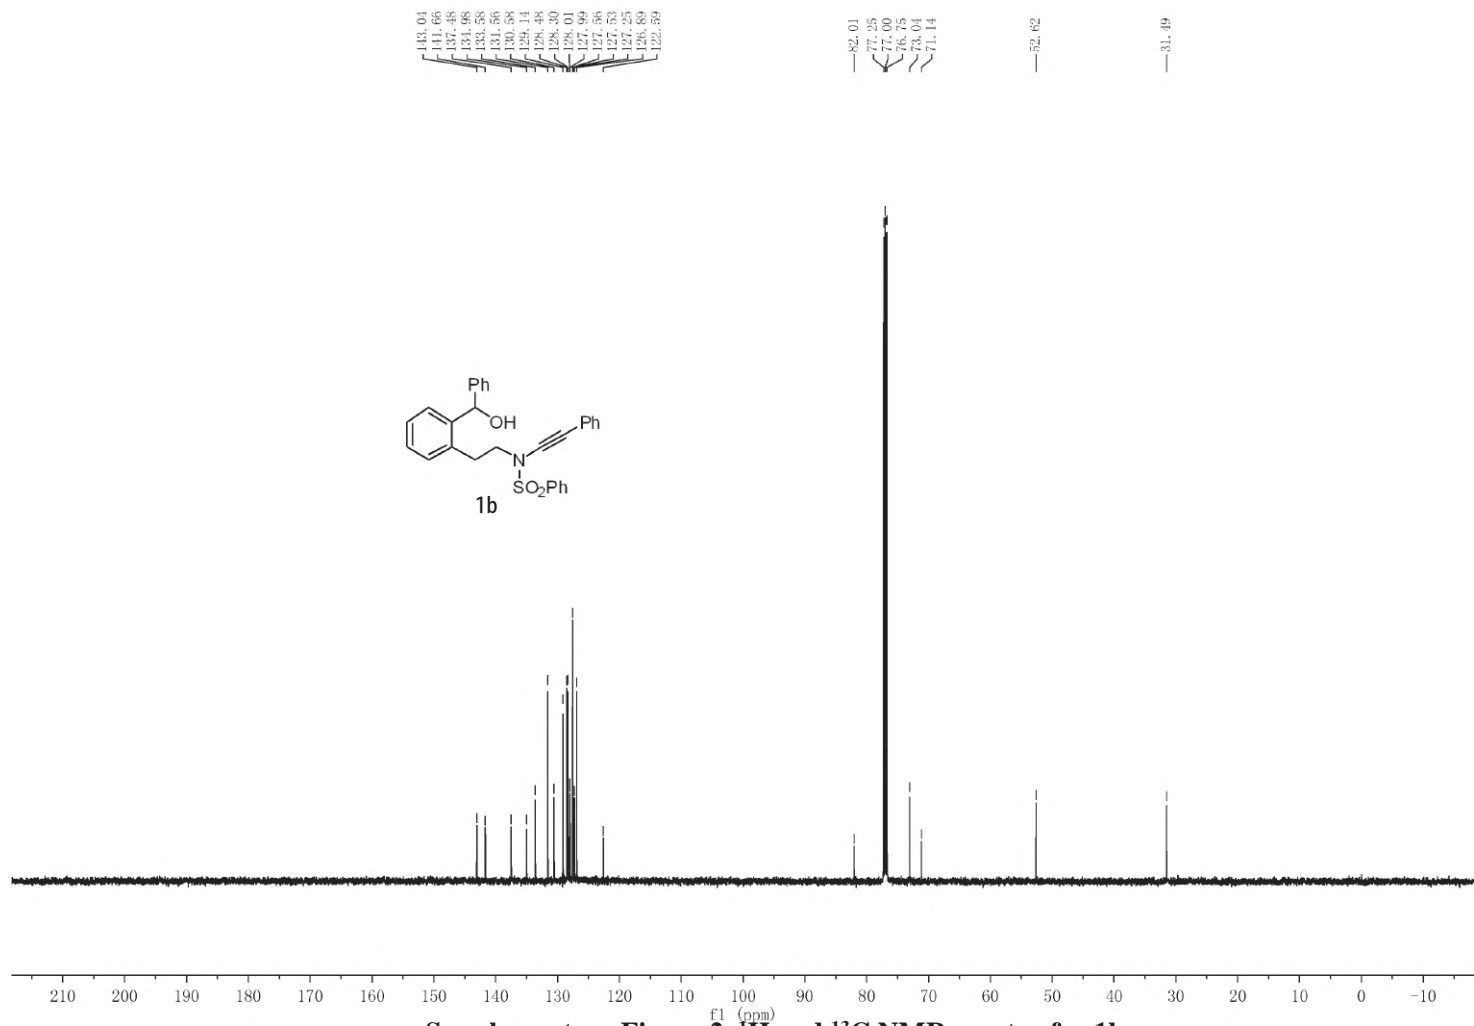

Supplementary Figure 2. <sup>1</sup>H and <sup>13</sup>C NMR spectra for 1b

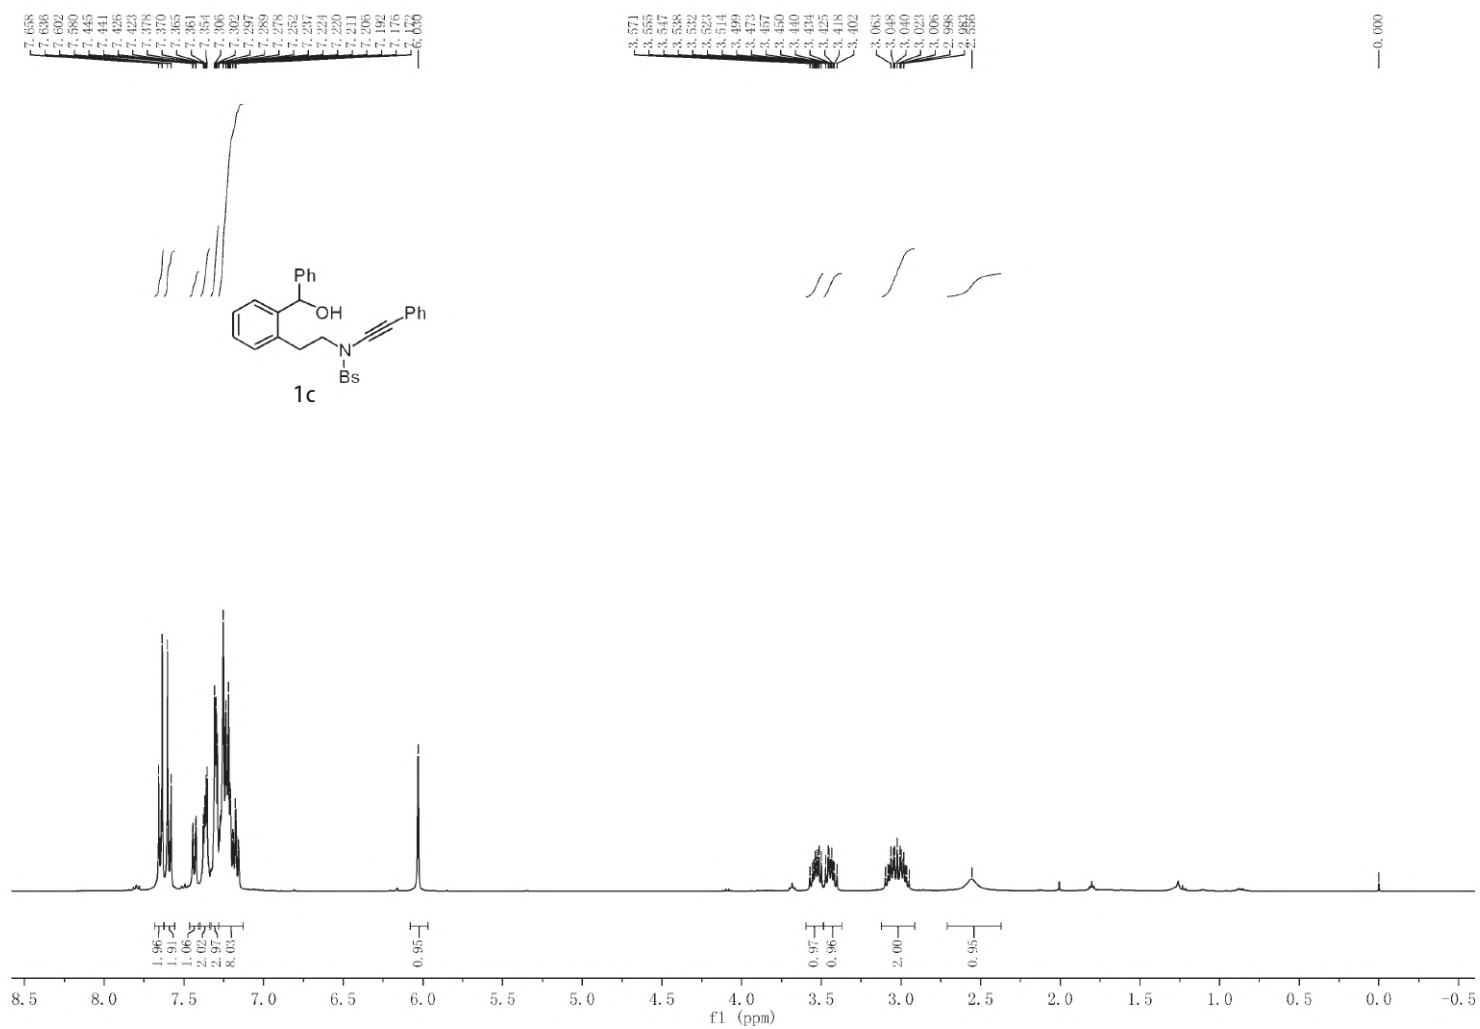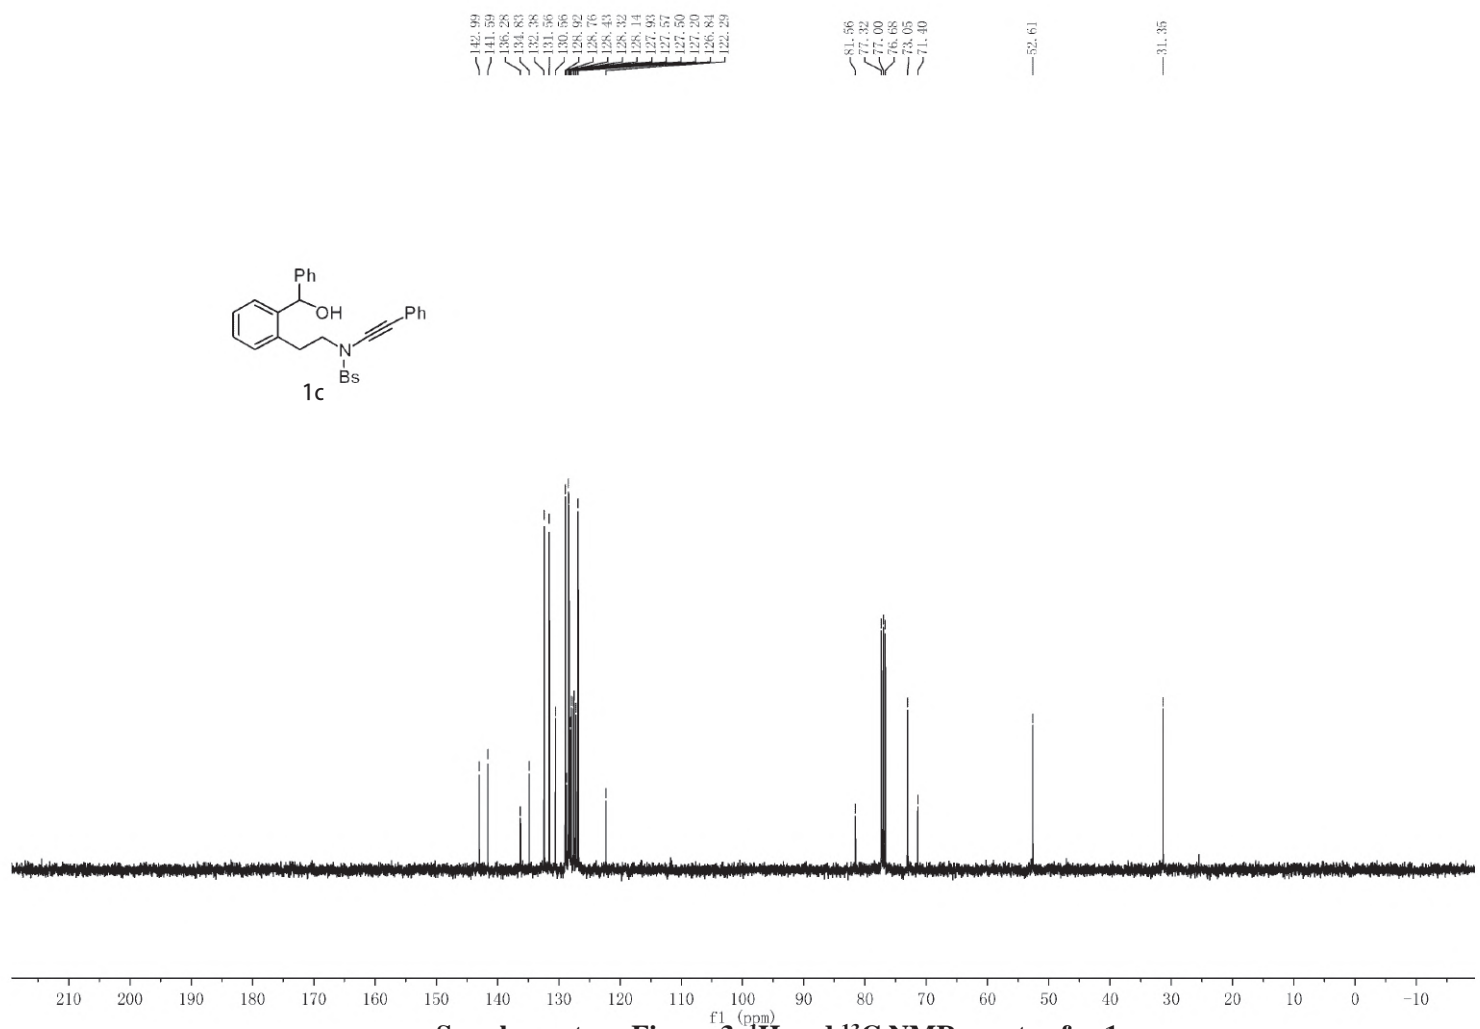

Supplementary Figure 3. <sup>1</sup>H and <sup>13</sup>C NMR spectra for 1c

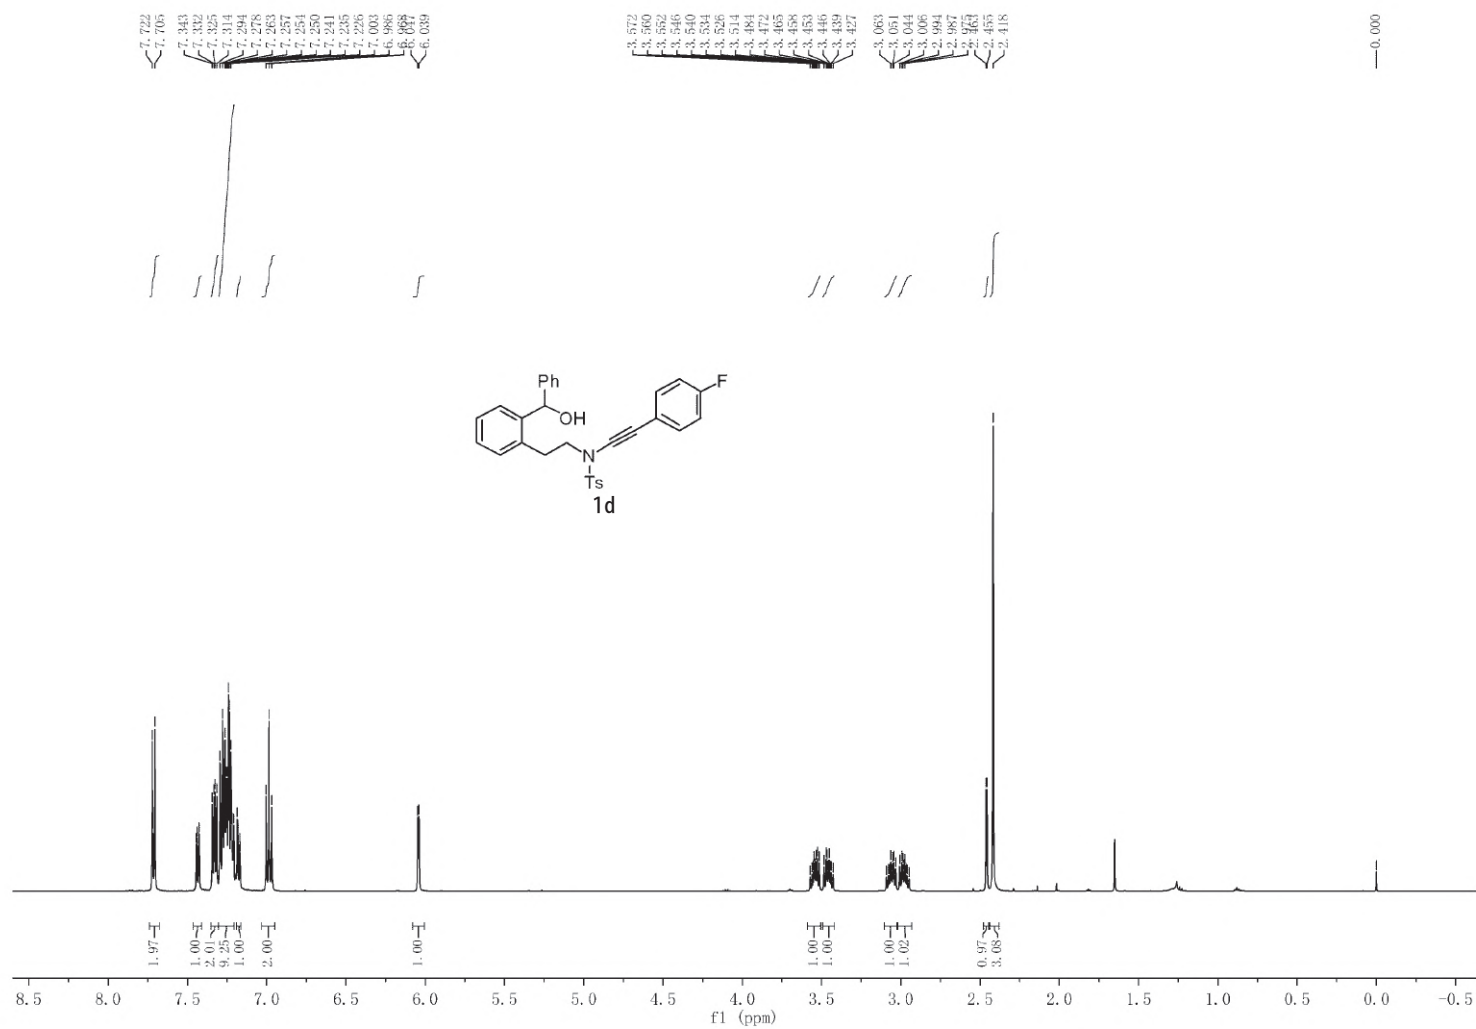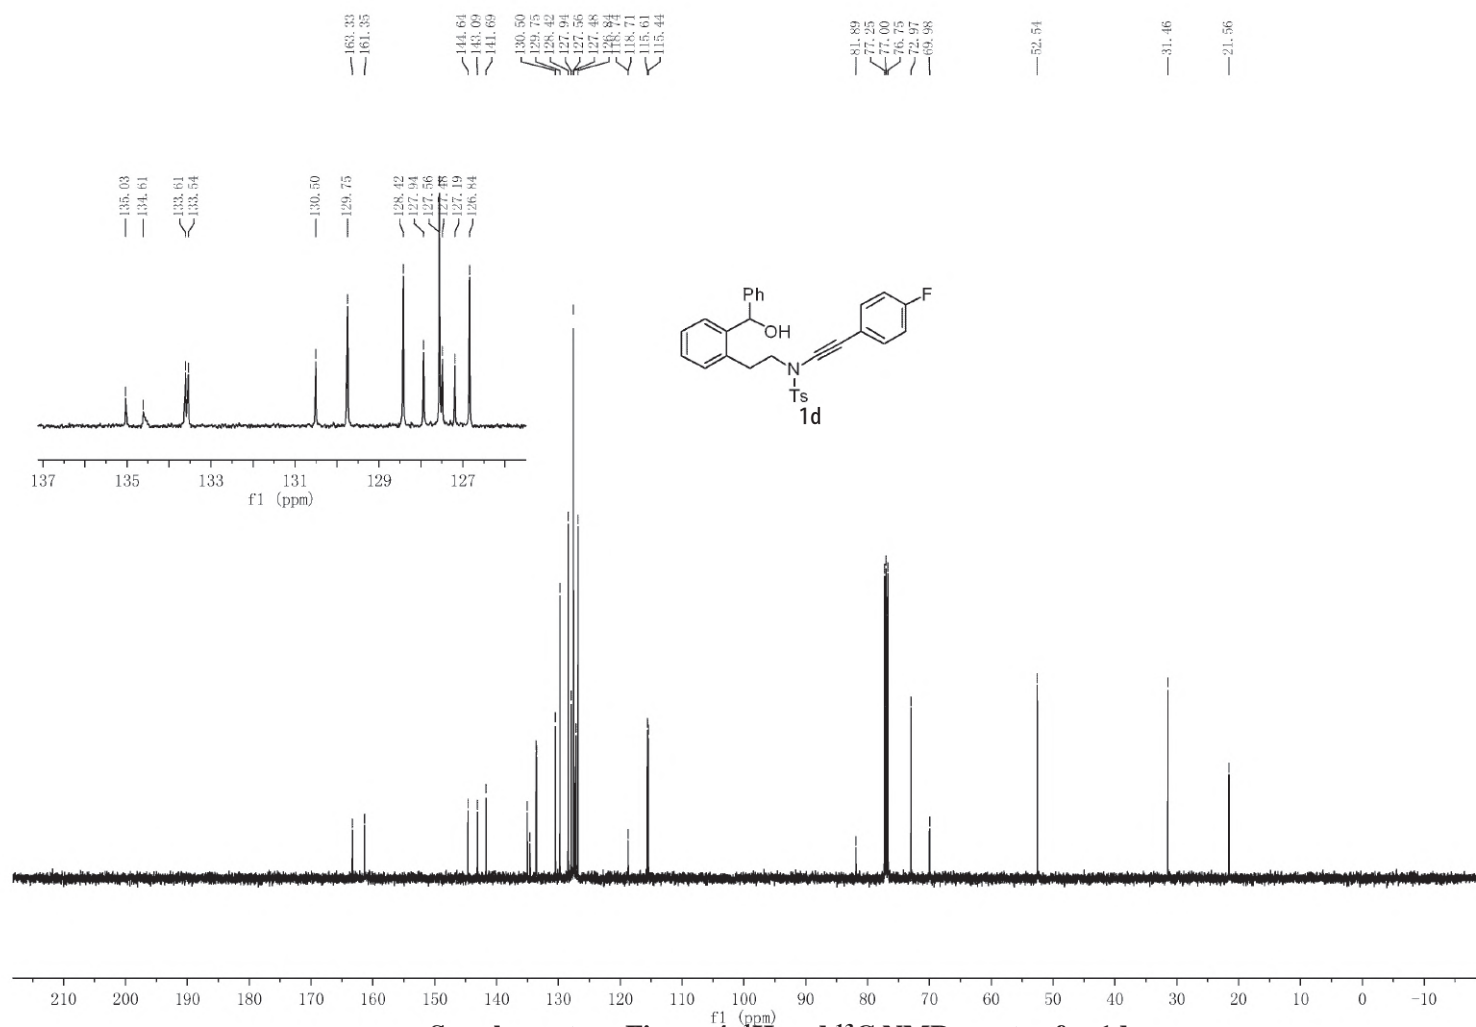

Supplementary Figure 4. <sup>1</sup>H and <sup>13</sup>C NMR spectra for 1d

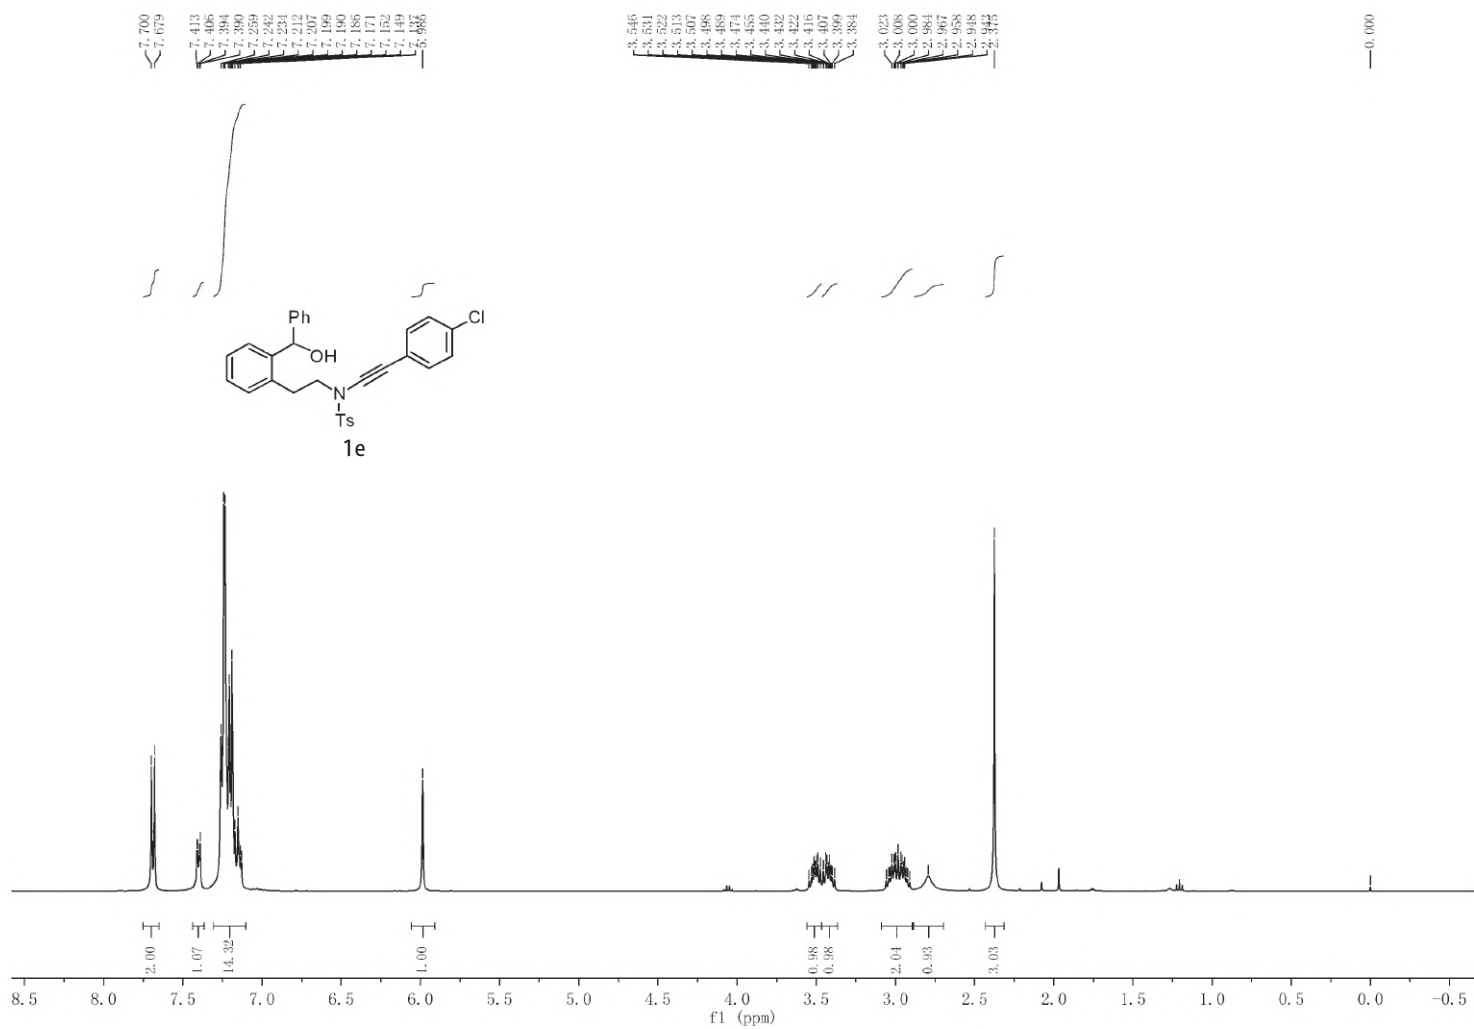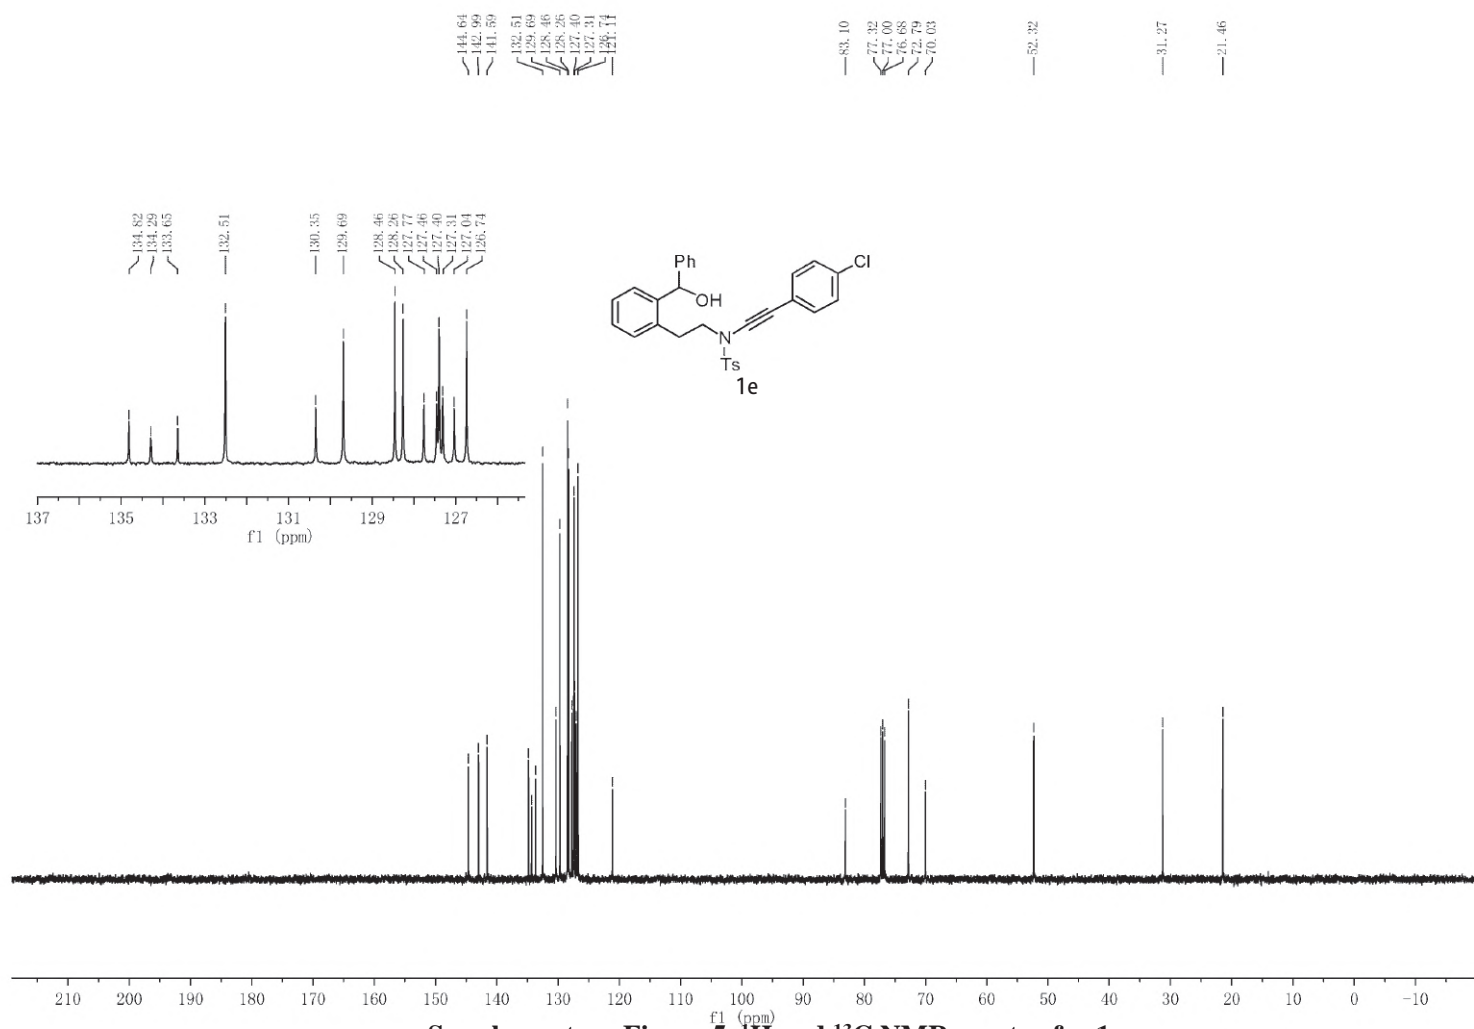

Supplementary Figure 5. <sup>1</sup>H and <sup>13</sup>C NMR spectra for 1e

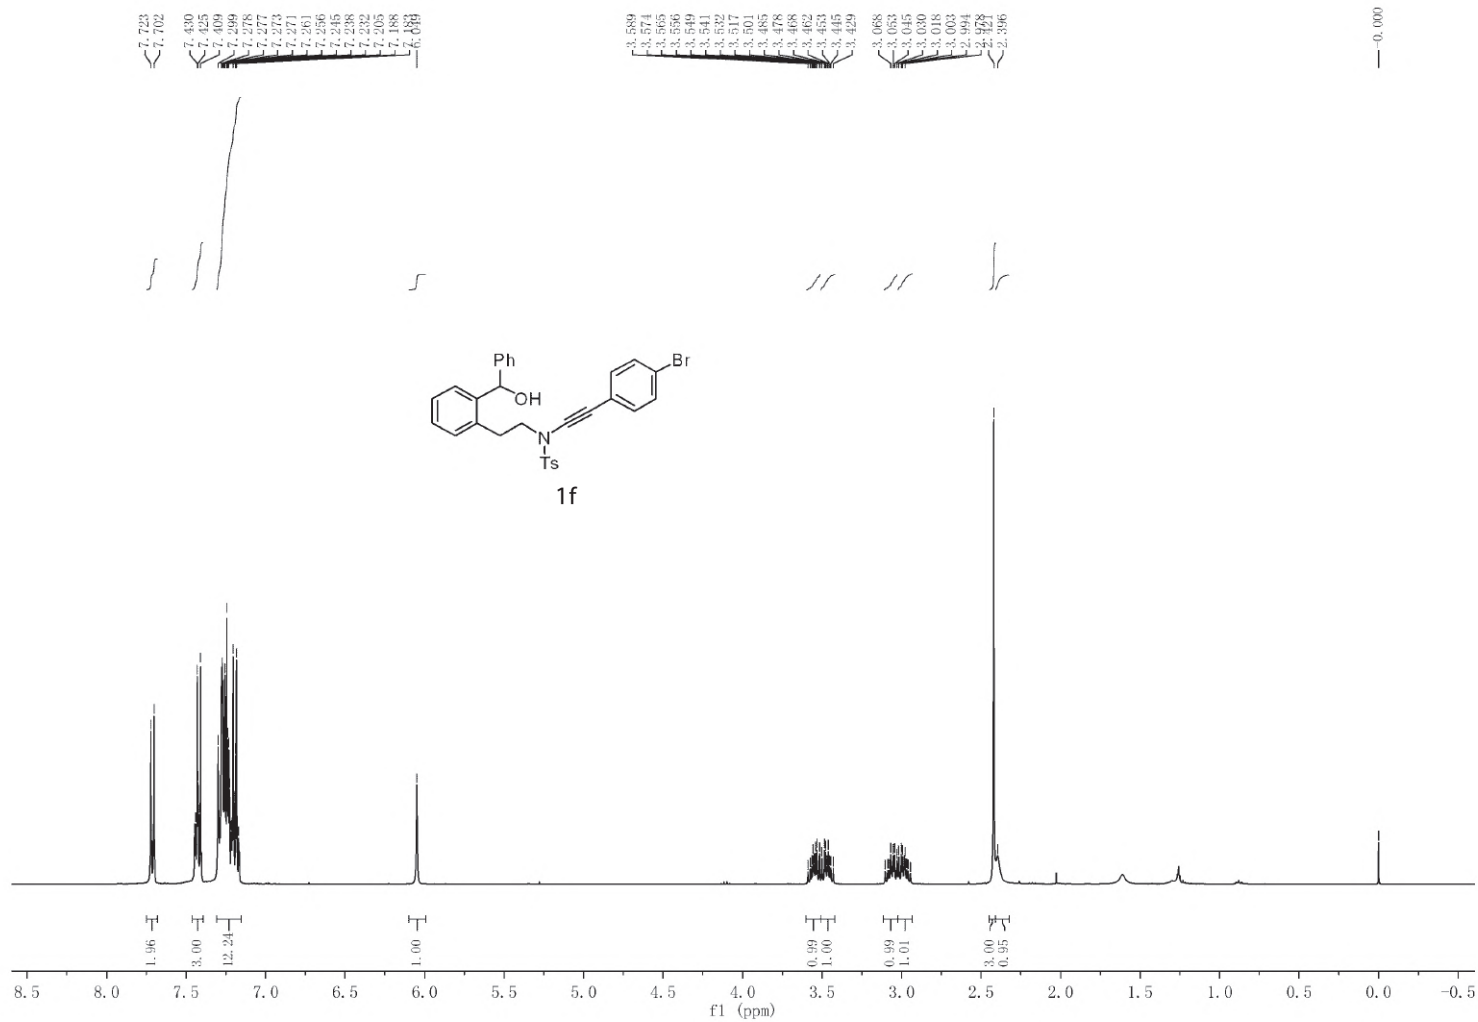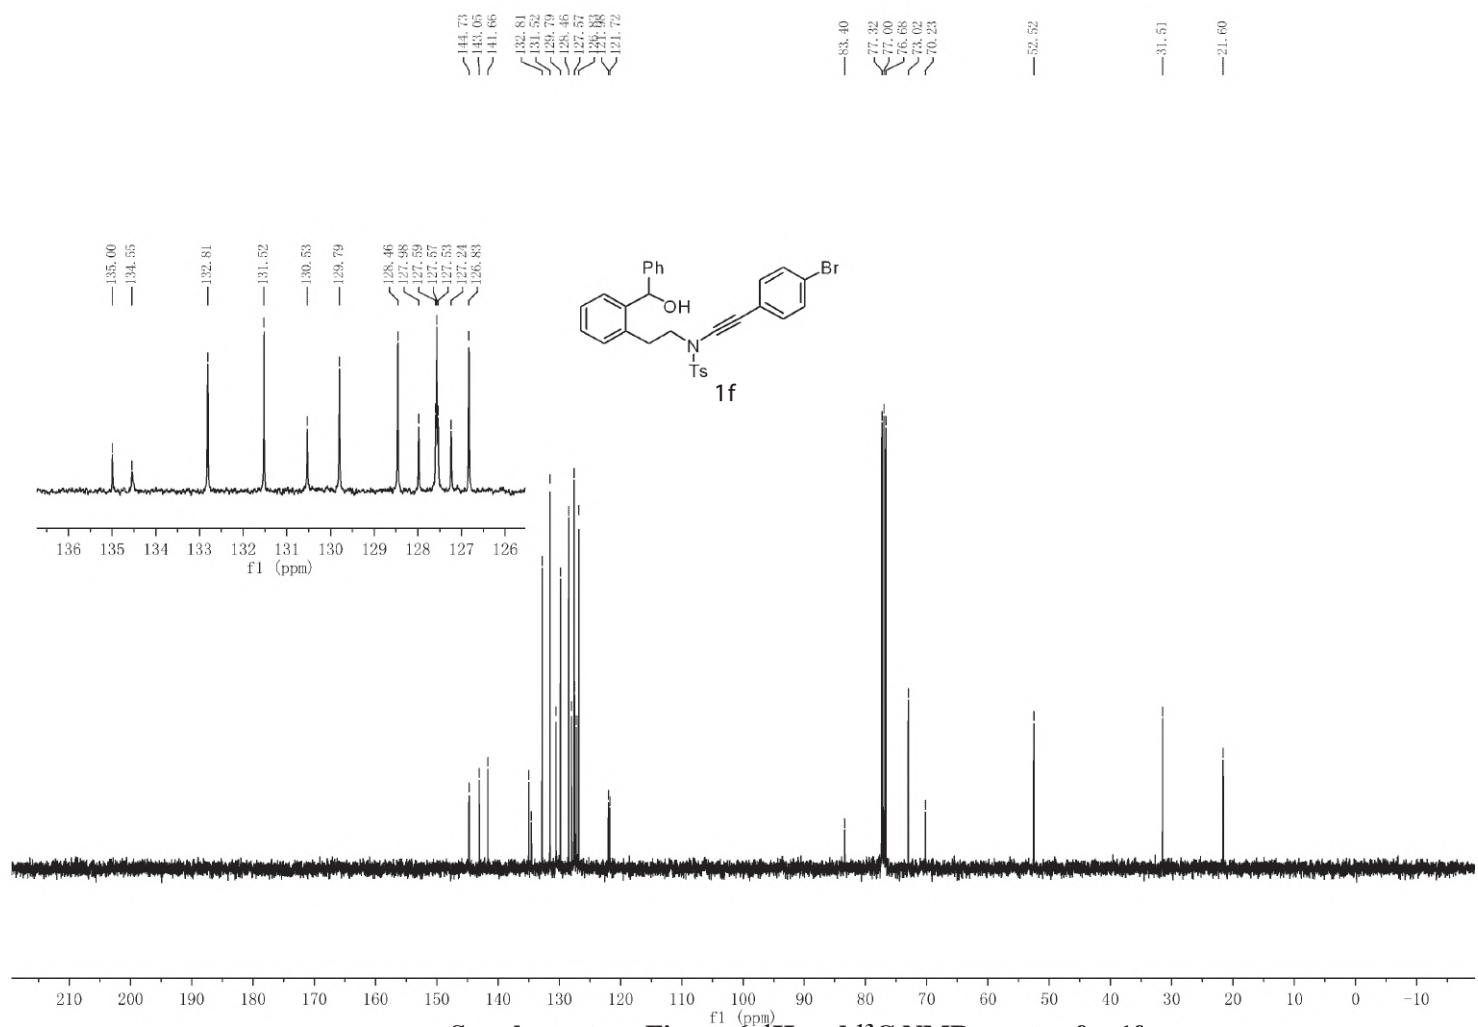

Supplementary Figure 6. <sup>1</sup>H and <sup>13</sup>C NMR spectra for **1f**

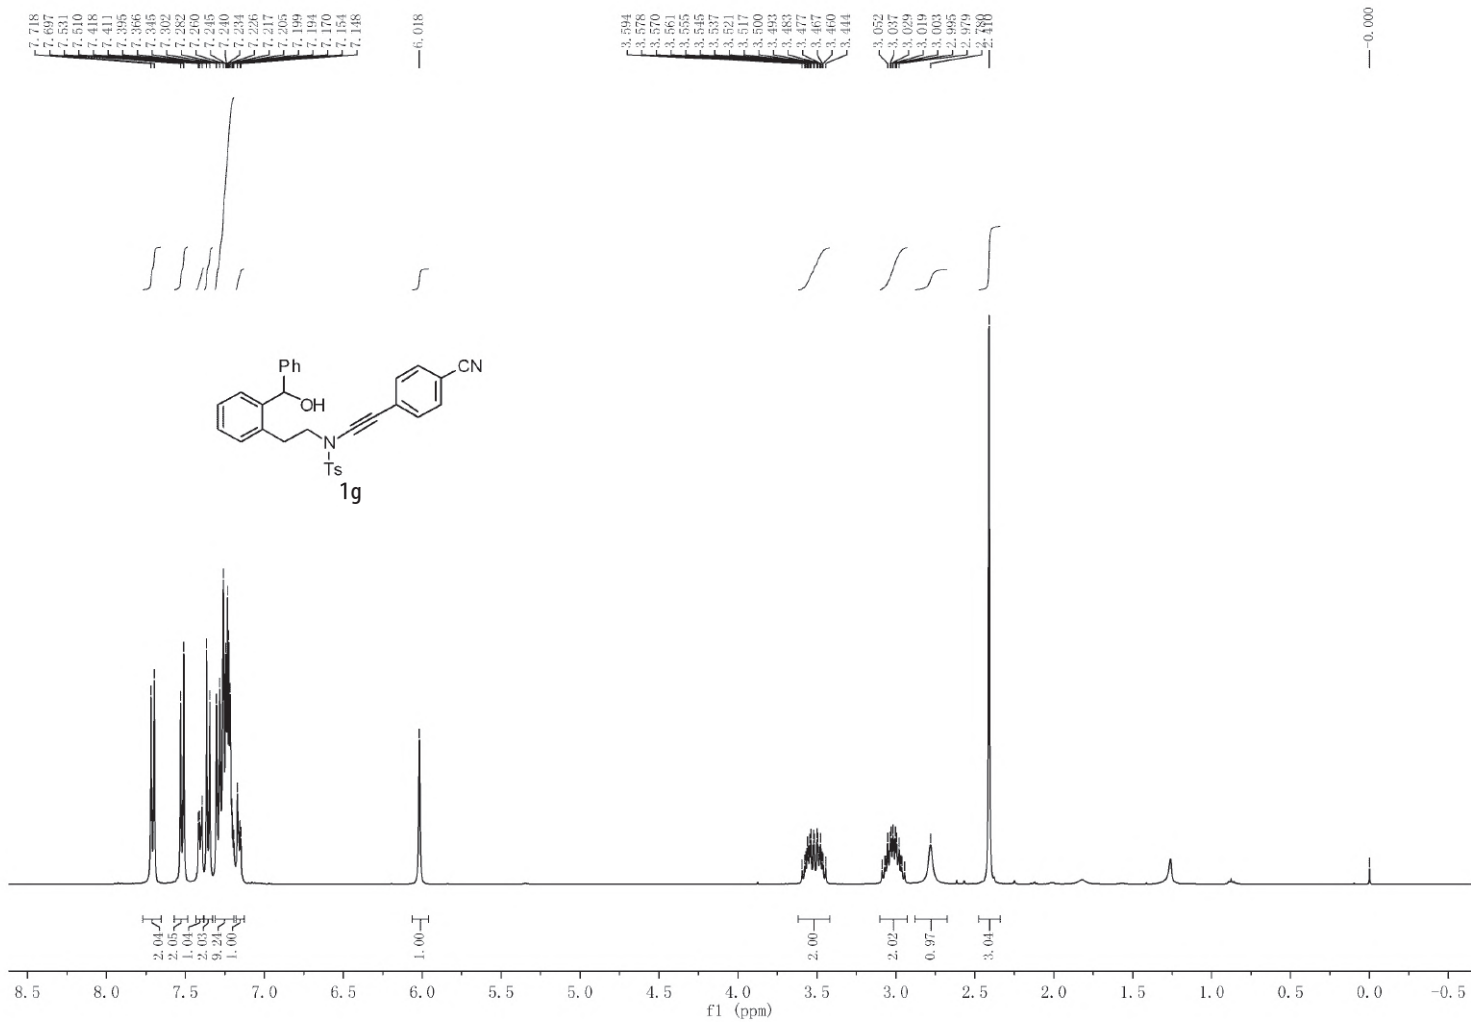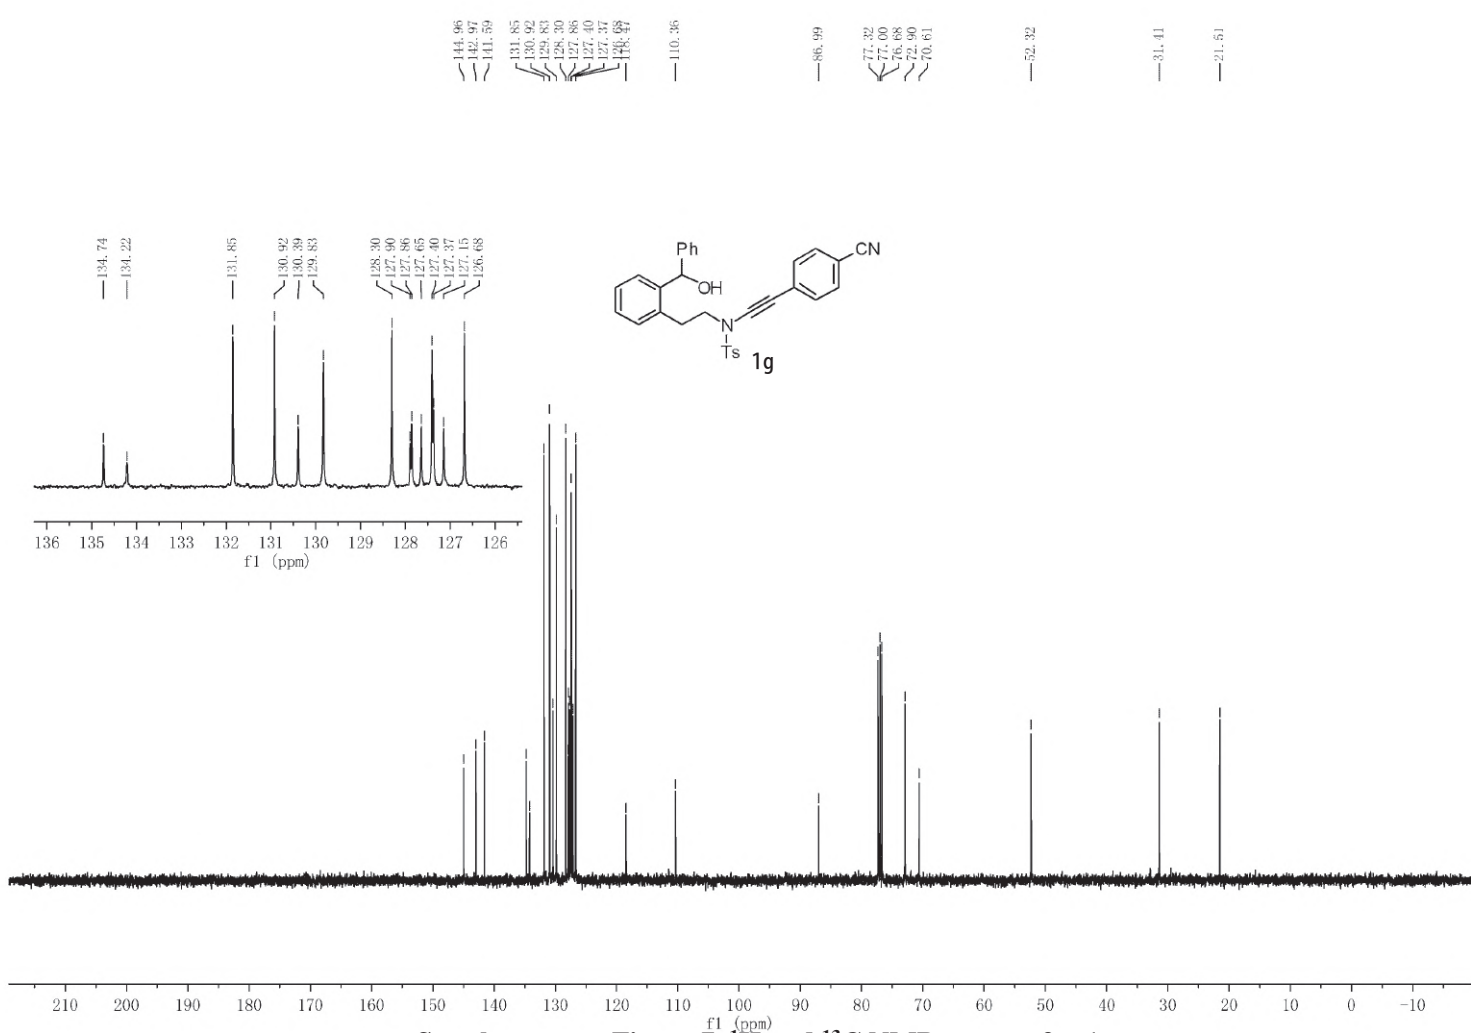

Supplementary Figure 7. <sup>1</sup>H and <sup>13</sup>C NMR spectra for 1g



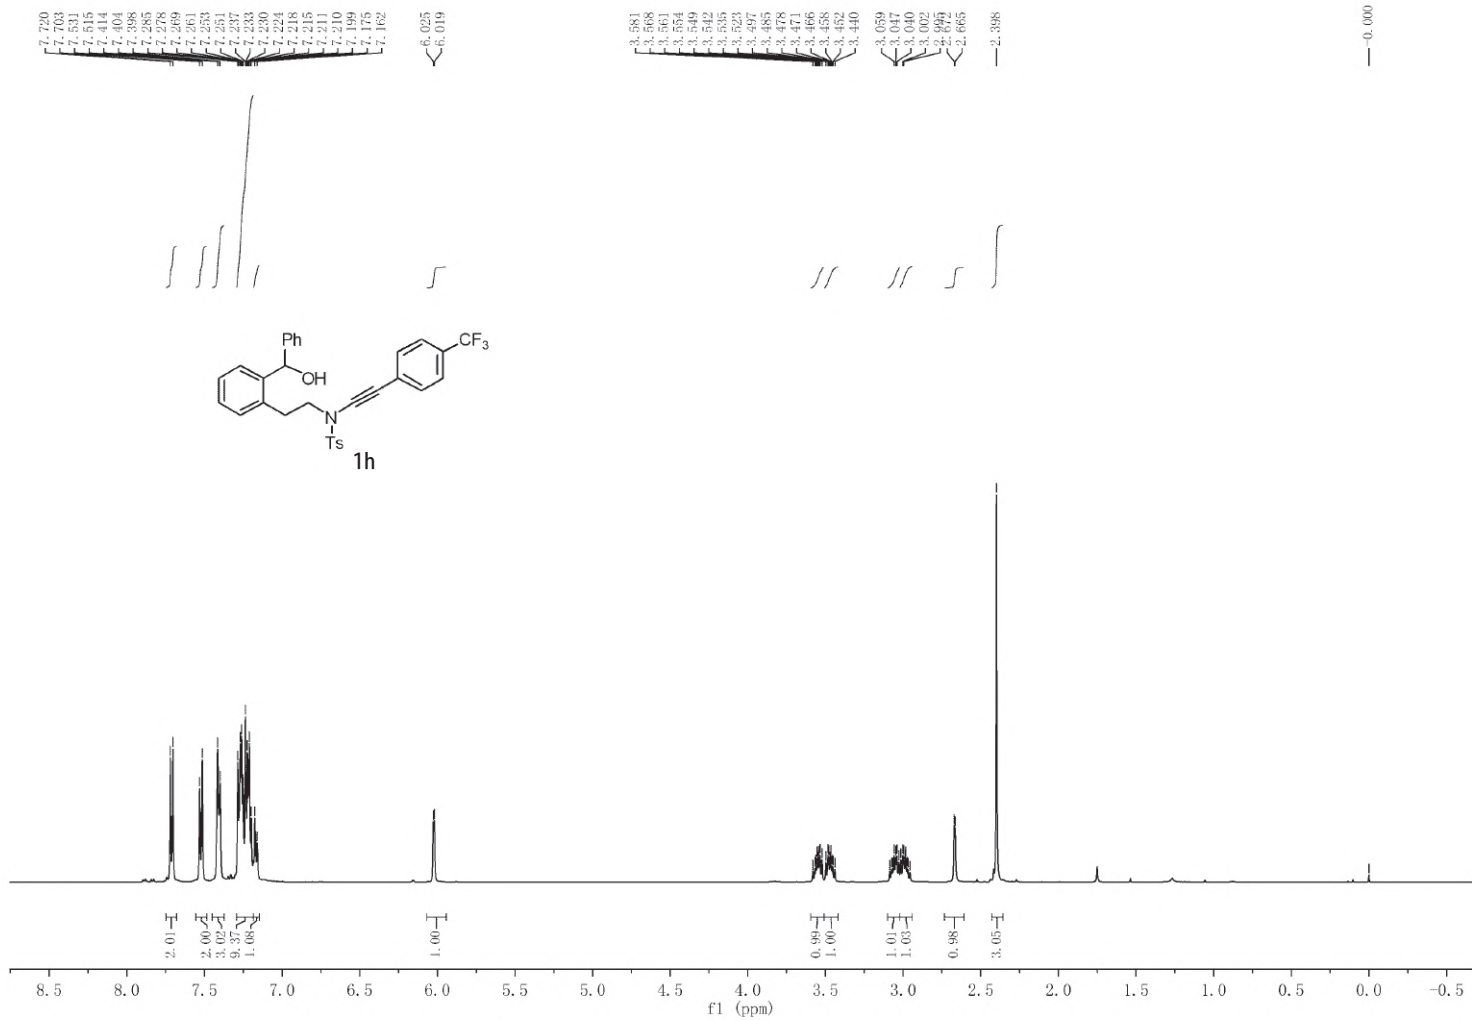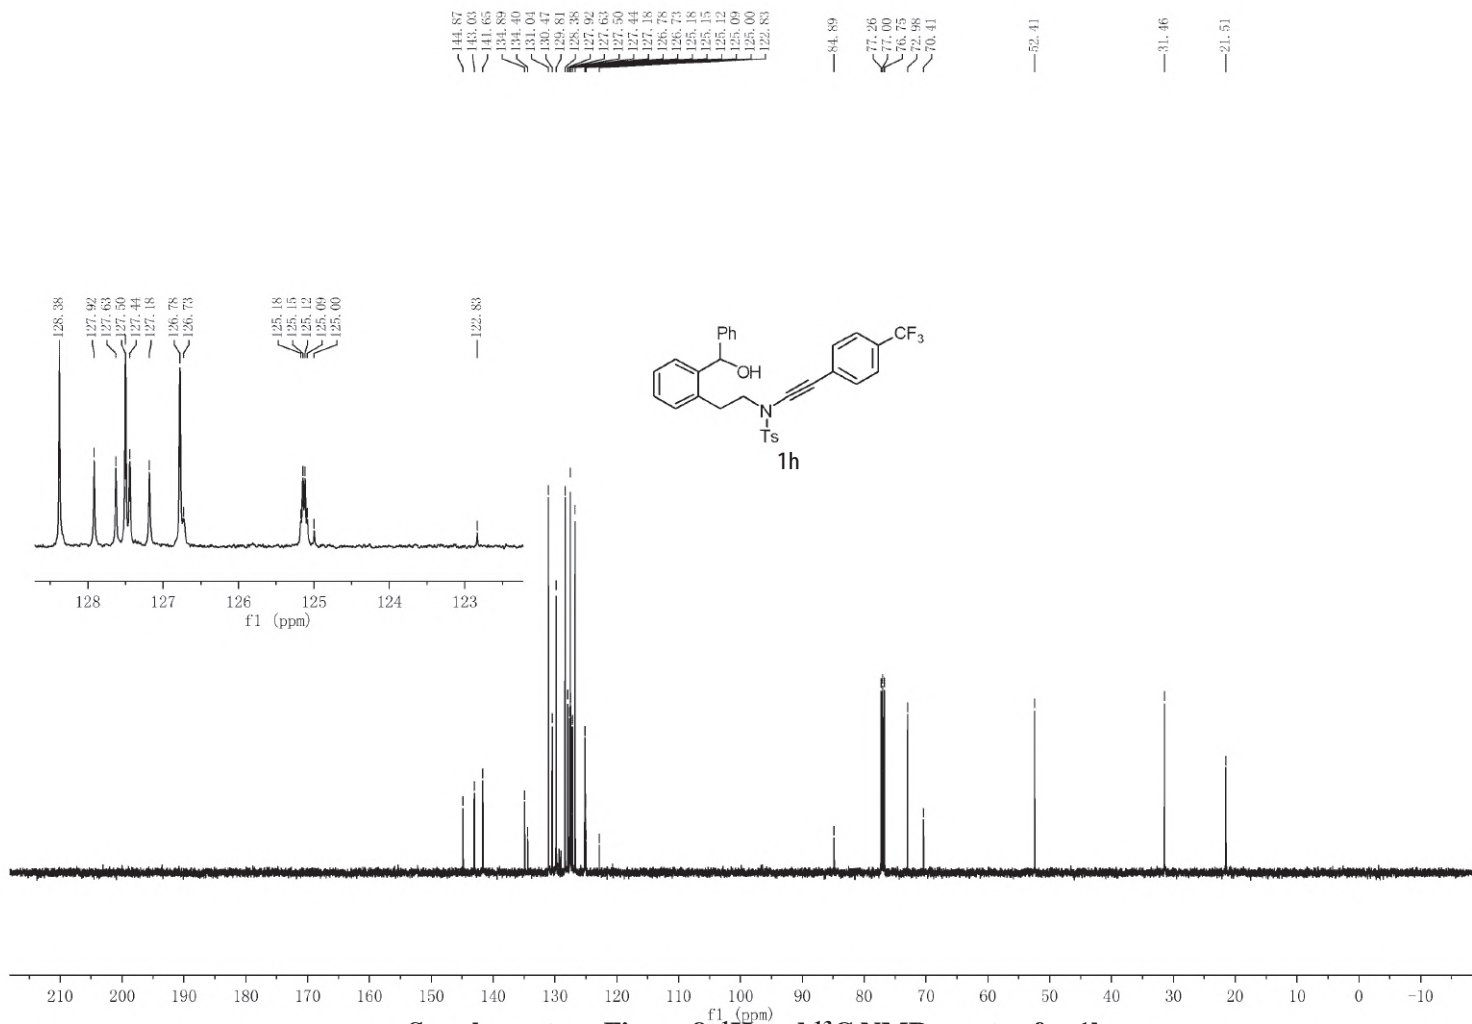

Supplementary Figure 8. <sup>1</sup>H and <sup>13</sup>C NMR spectra for 1h

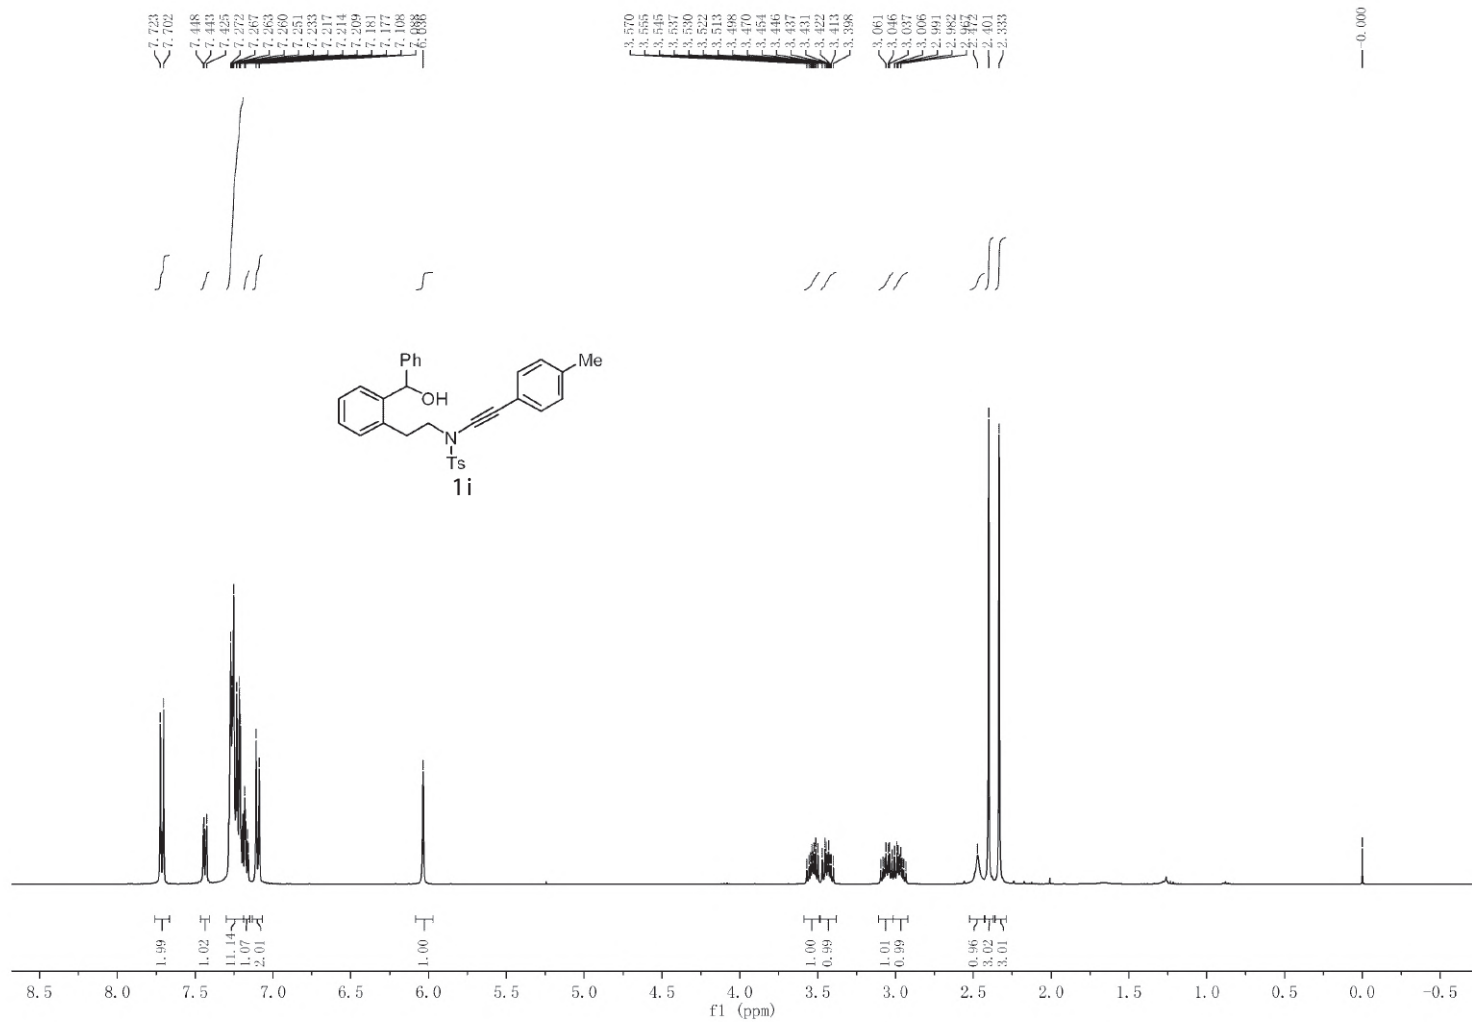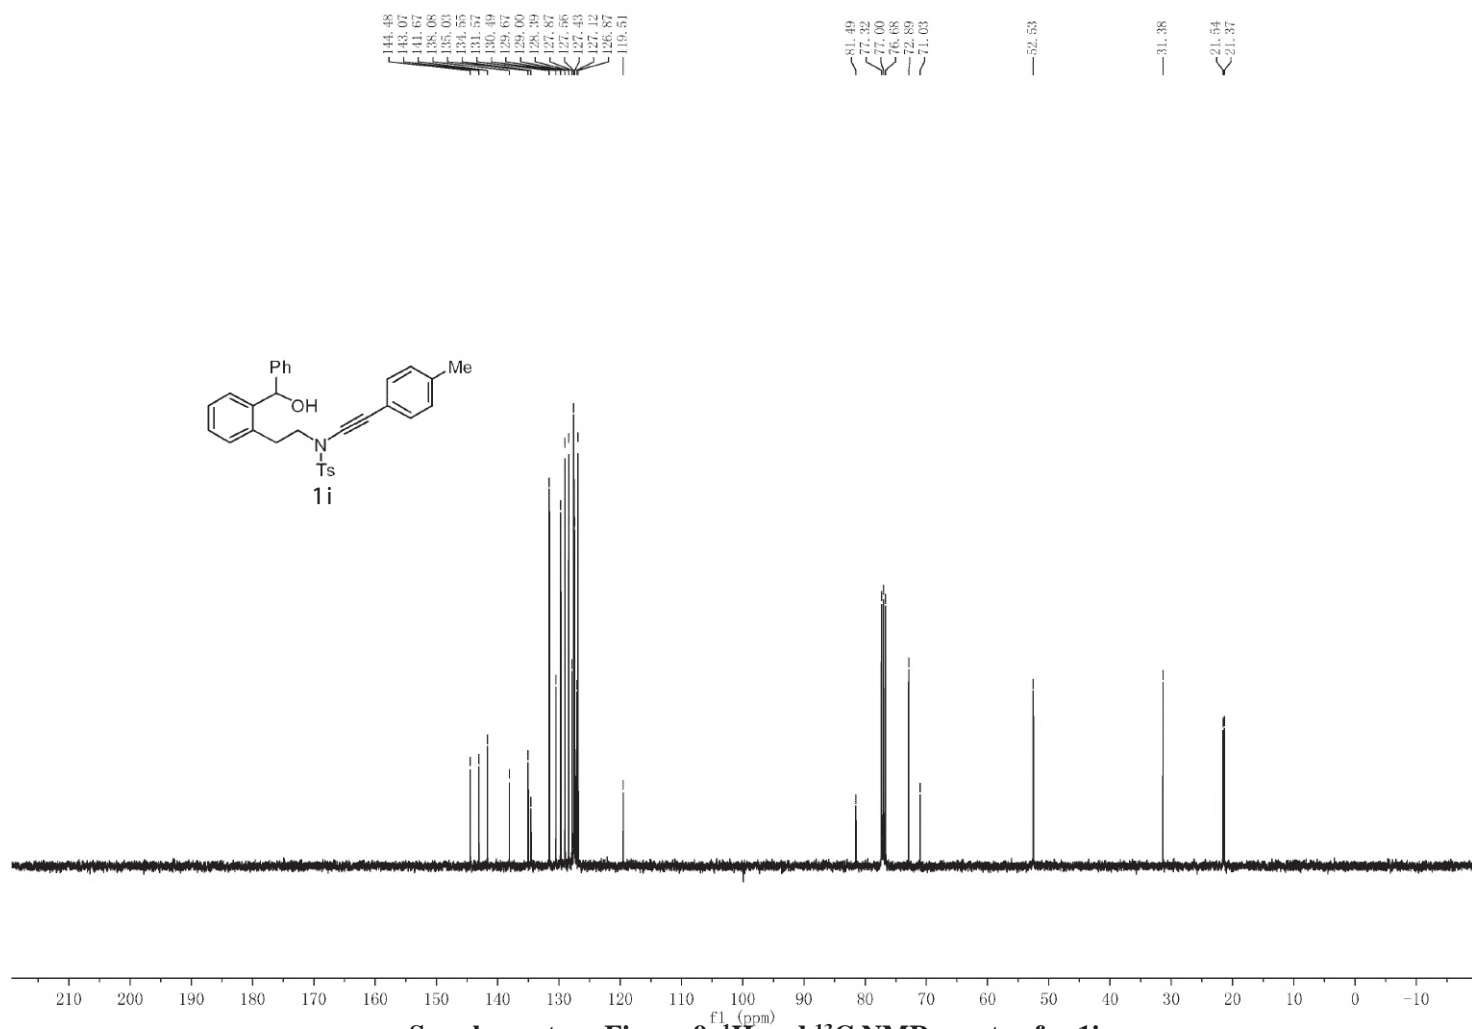

Supplementary Figure 9. <sup>1</sup>H and <sup>13</sup>C NMR spectra for **1i**

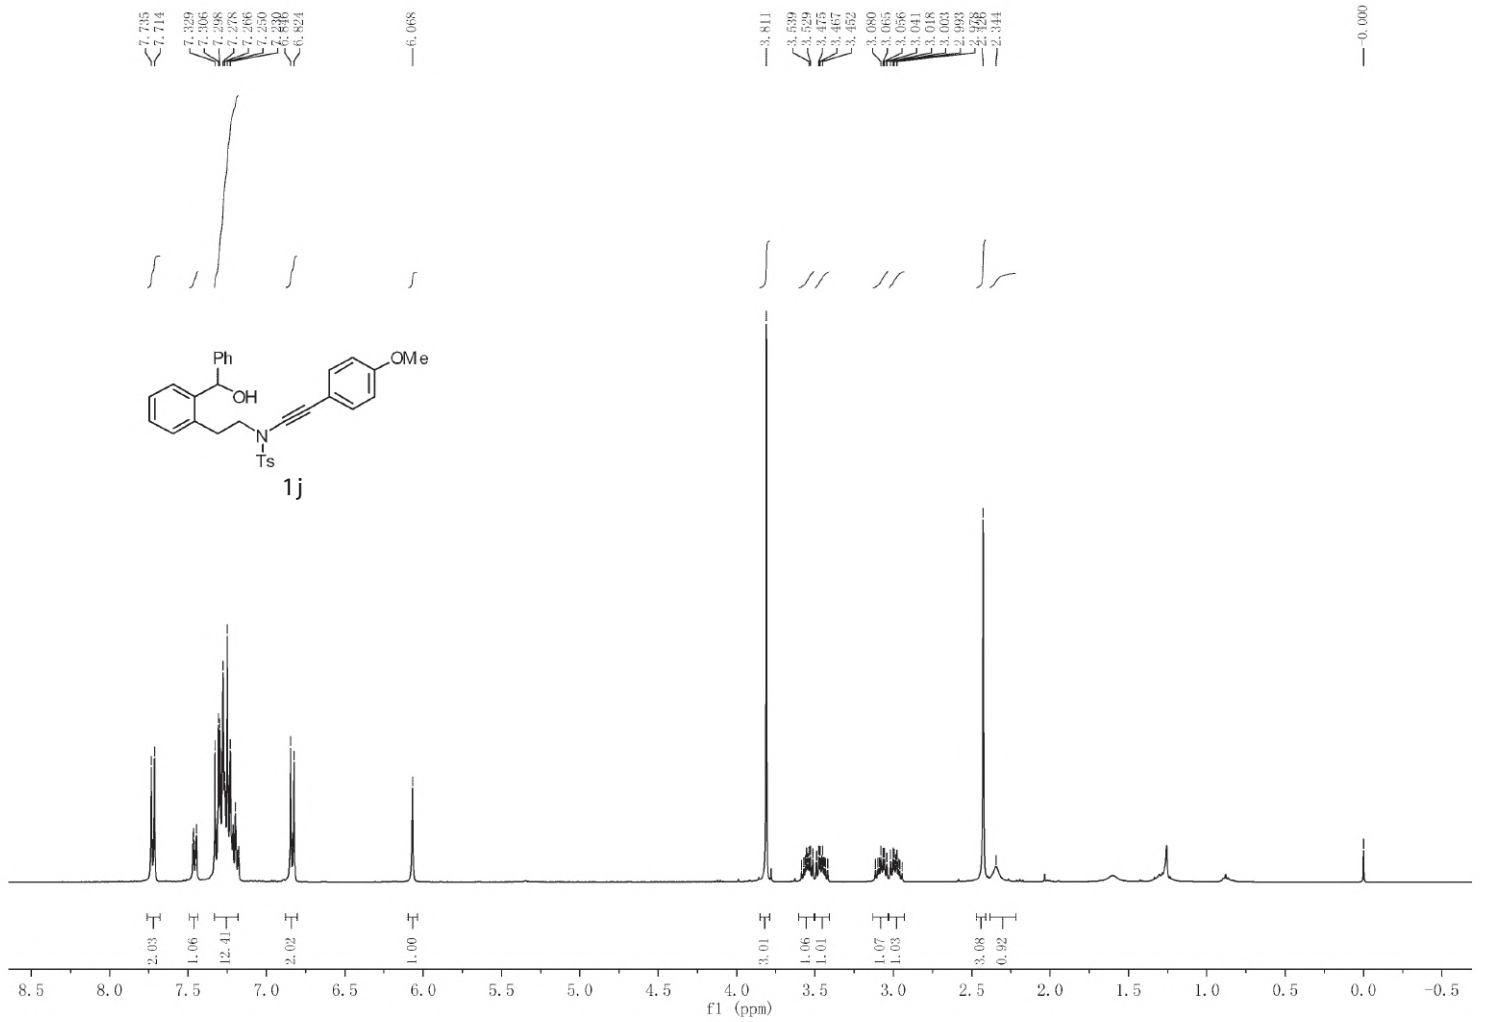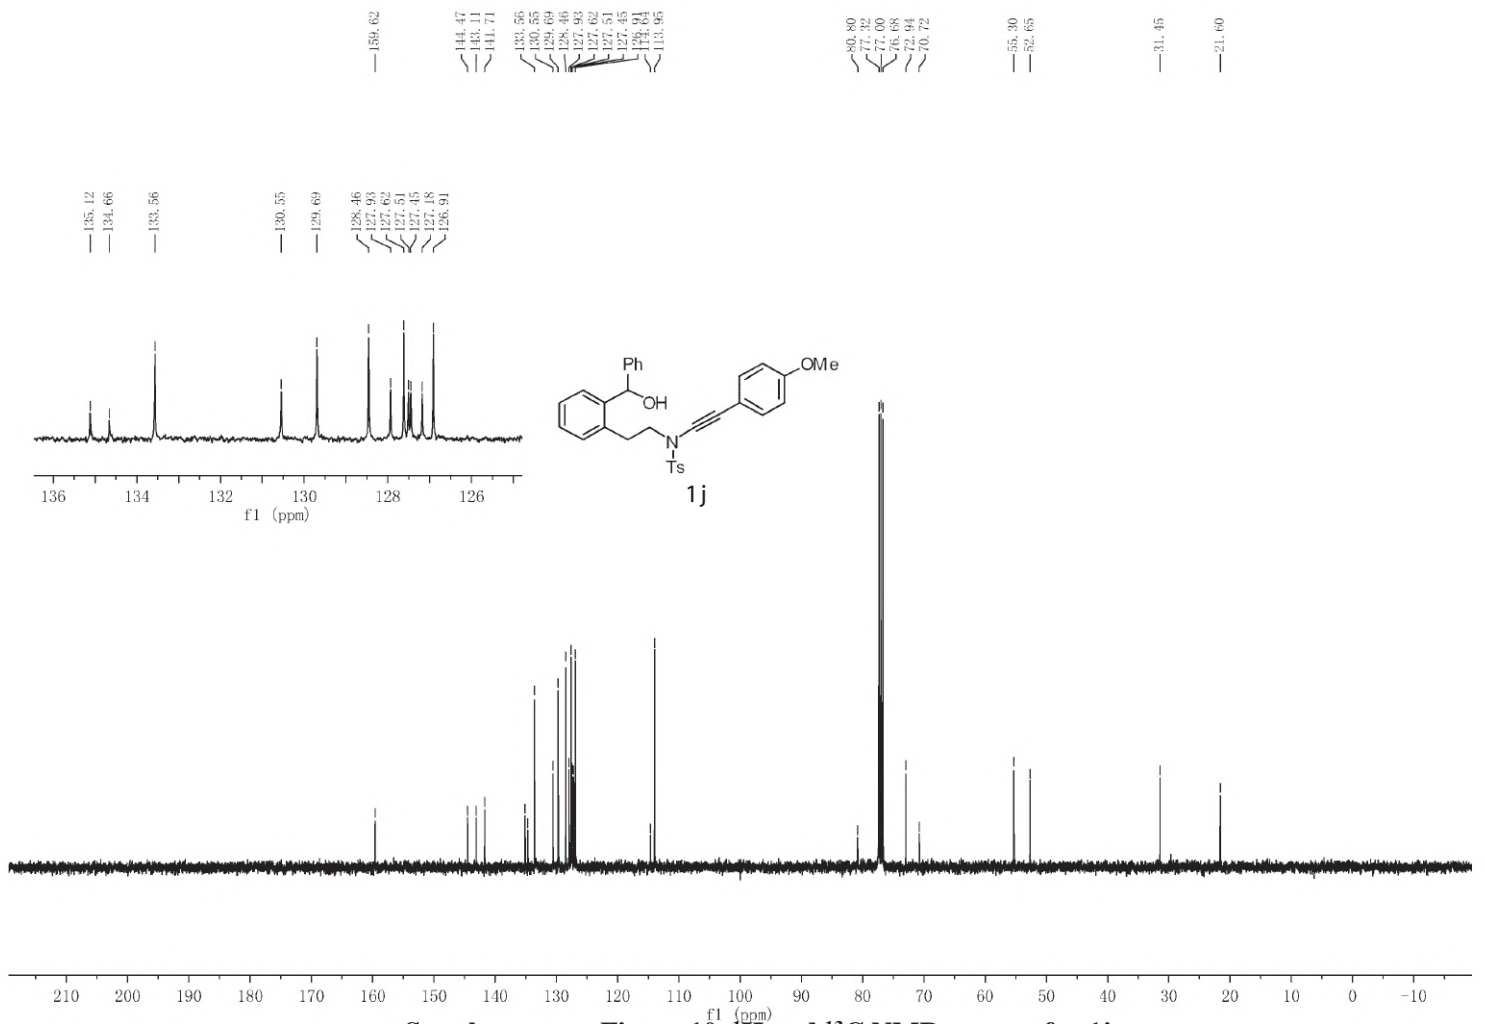

Supplementary Figure 10. <sup>1</sup>H and <sup>13</sup>C NMR spectra for **1j**

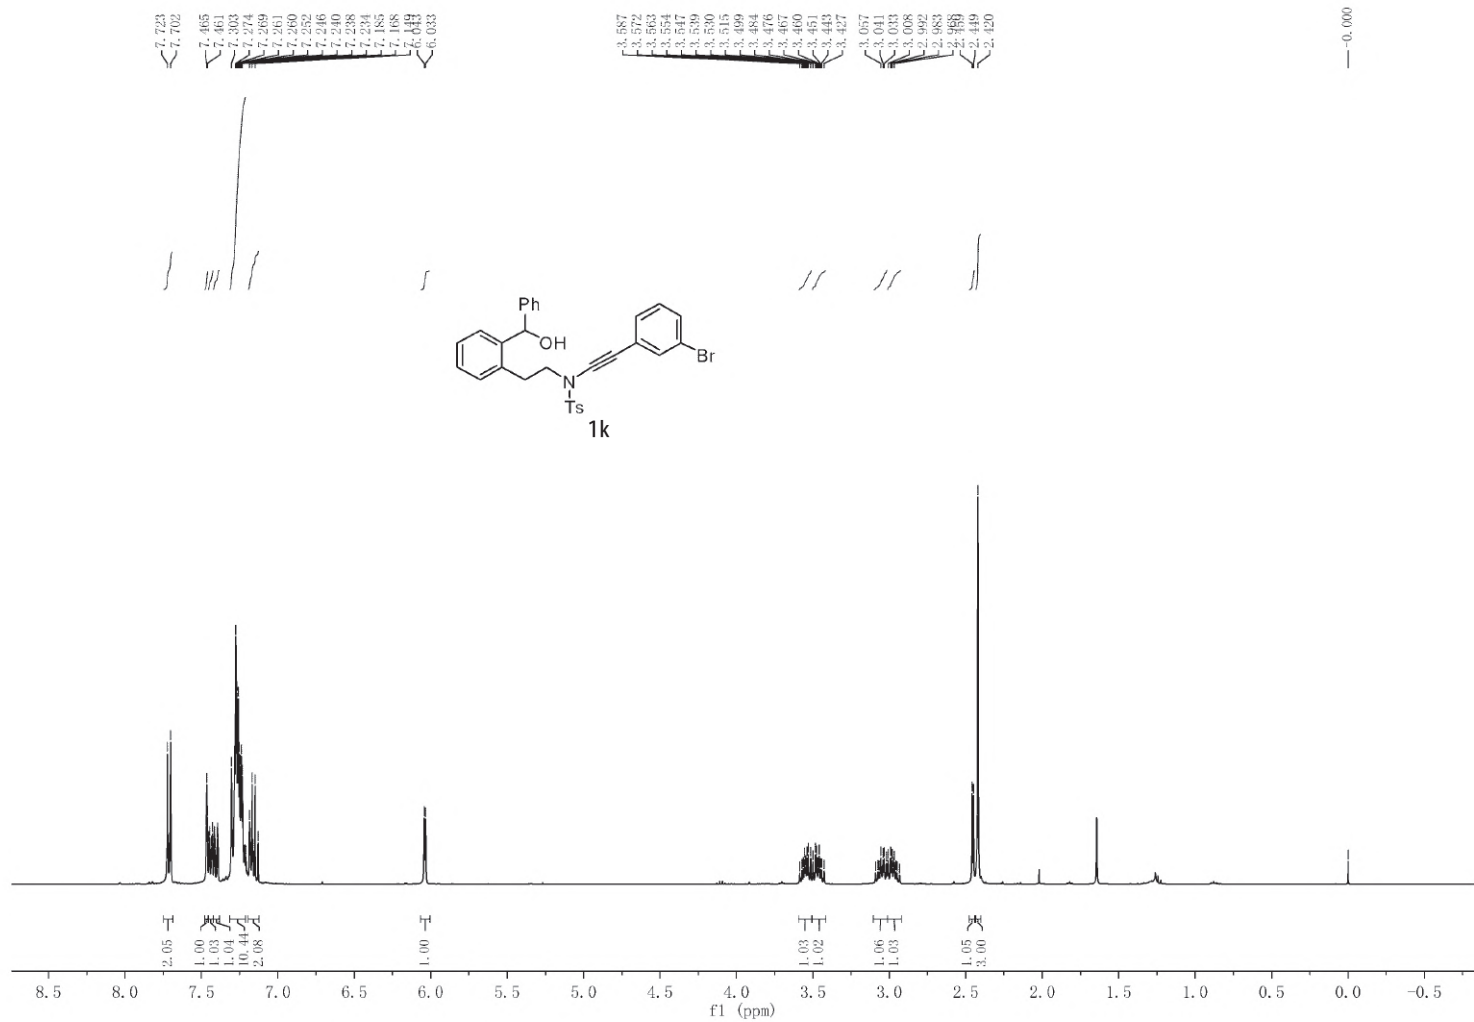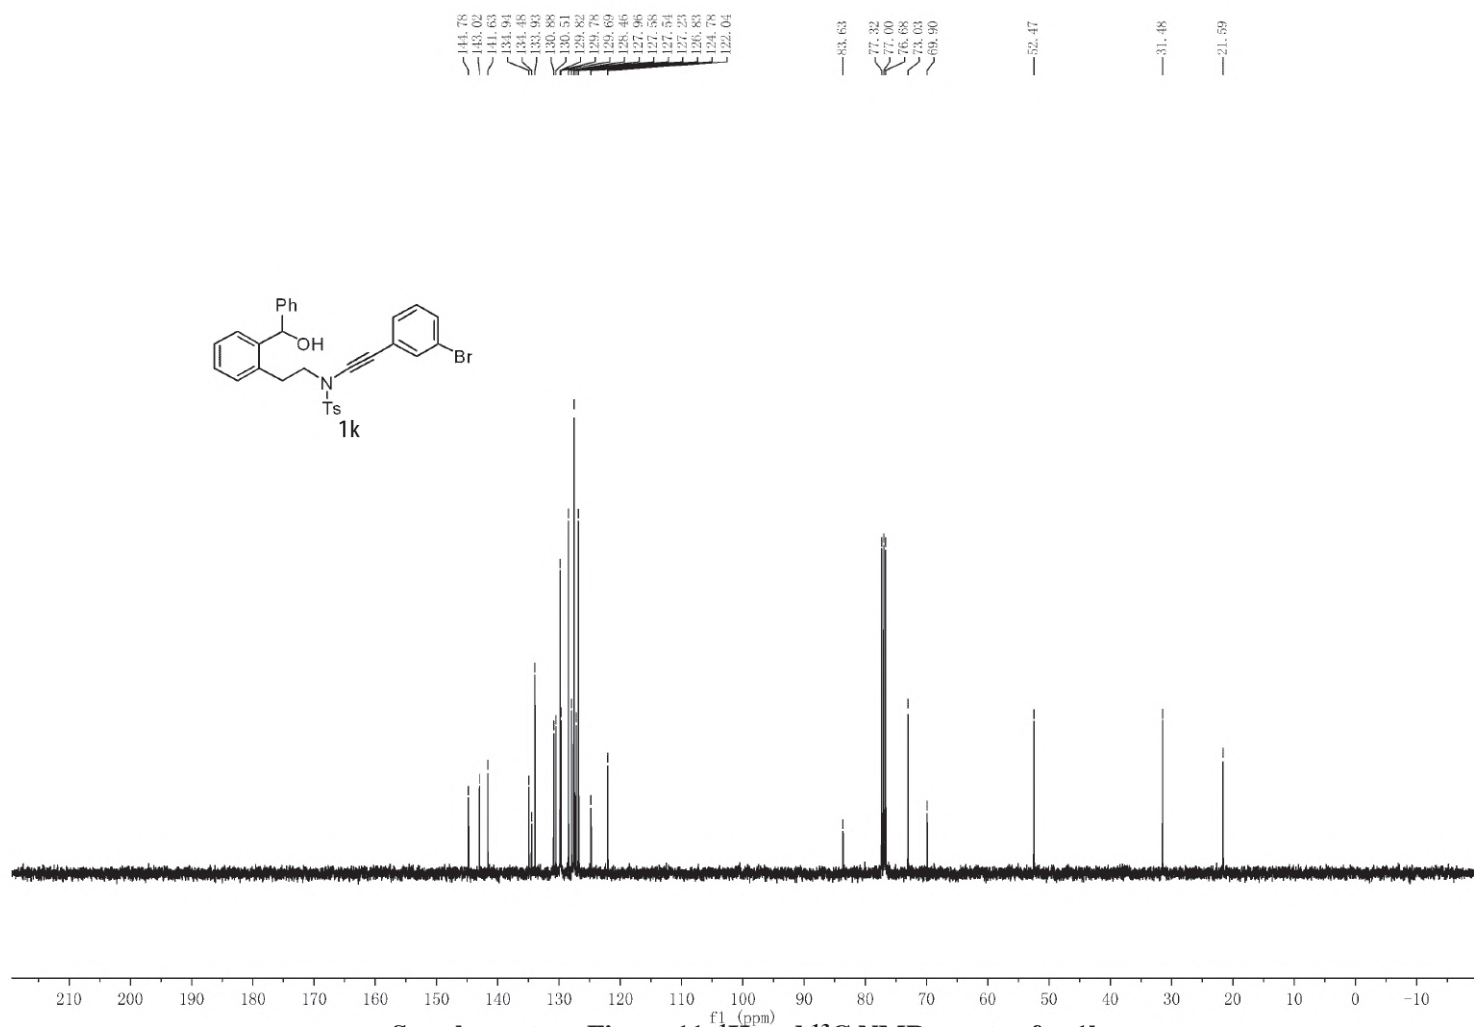

Supplementary Figure 11. <sup>1</sup>H and <sup>13</sup>C NMR spectra for **1k**

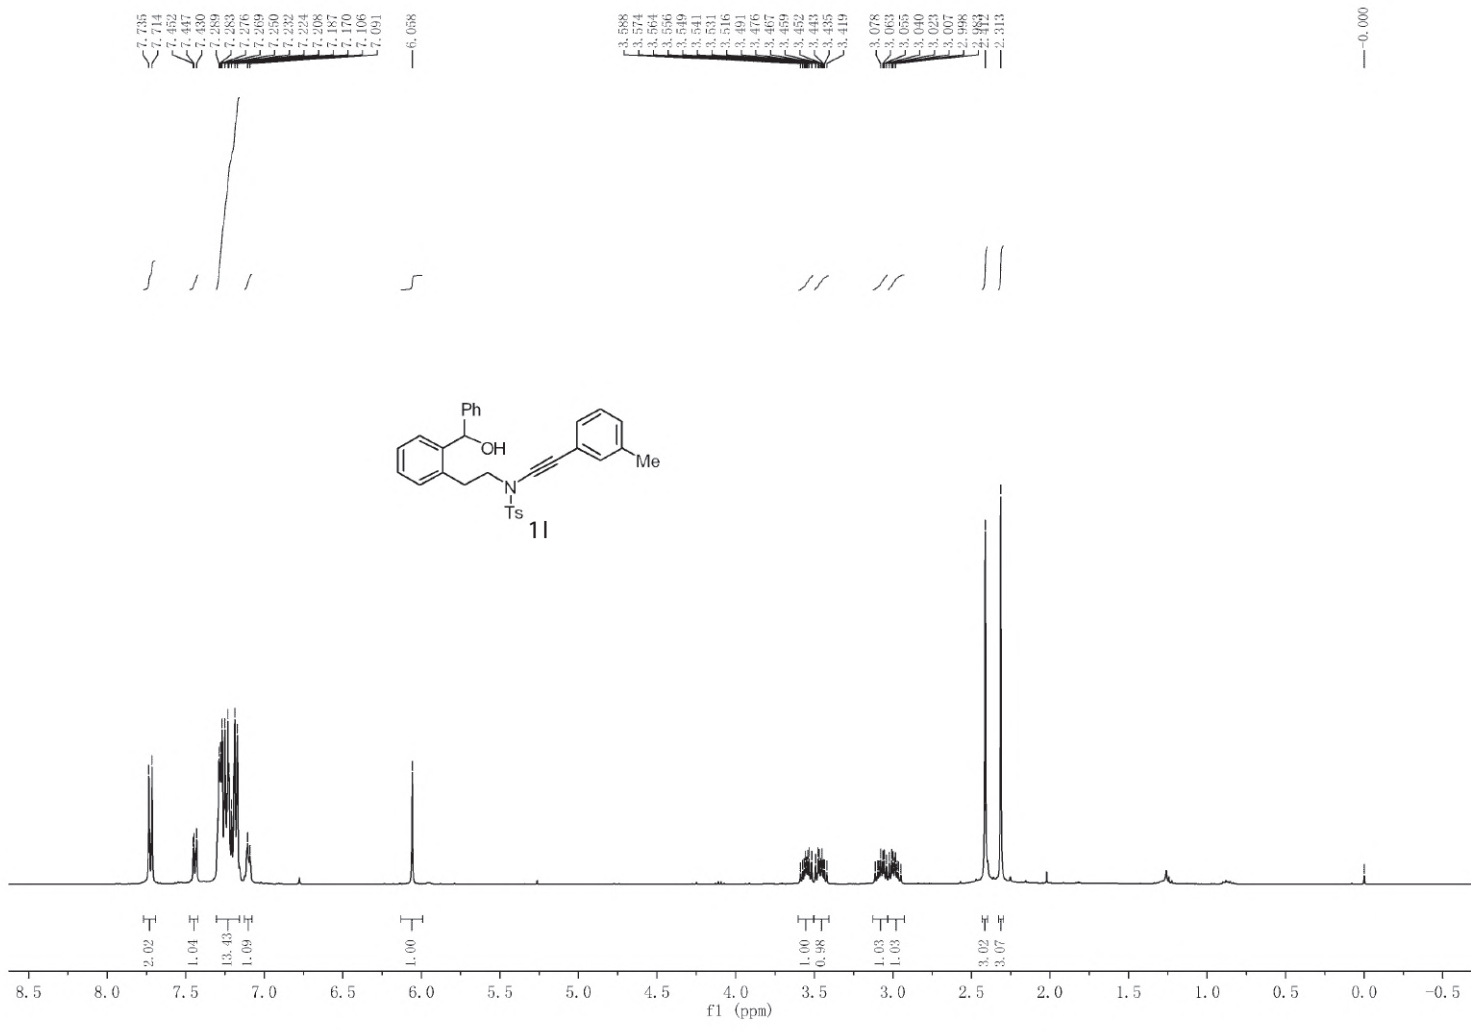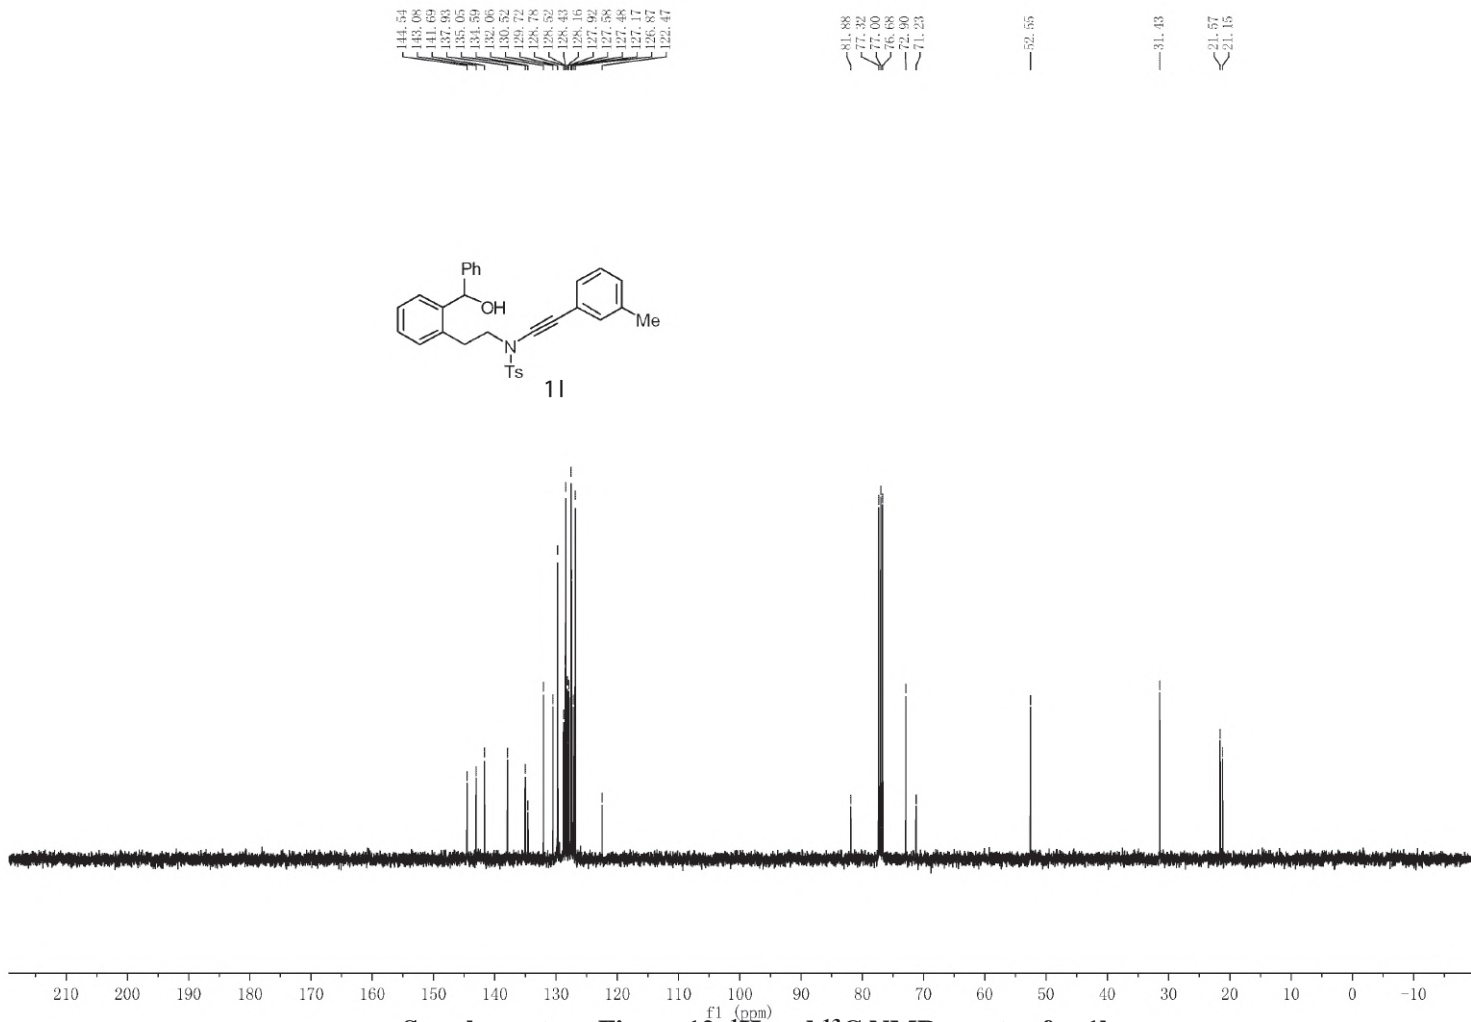

Supplementary Figure 12. <sup>1</sup>H and <sup>13</sup>C NMR spectra for 11

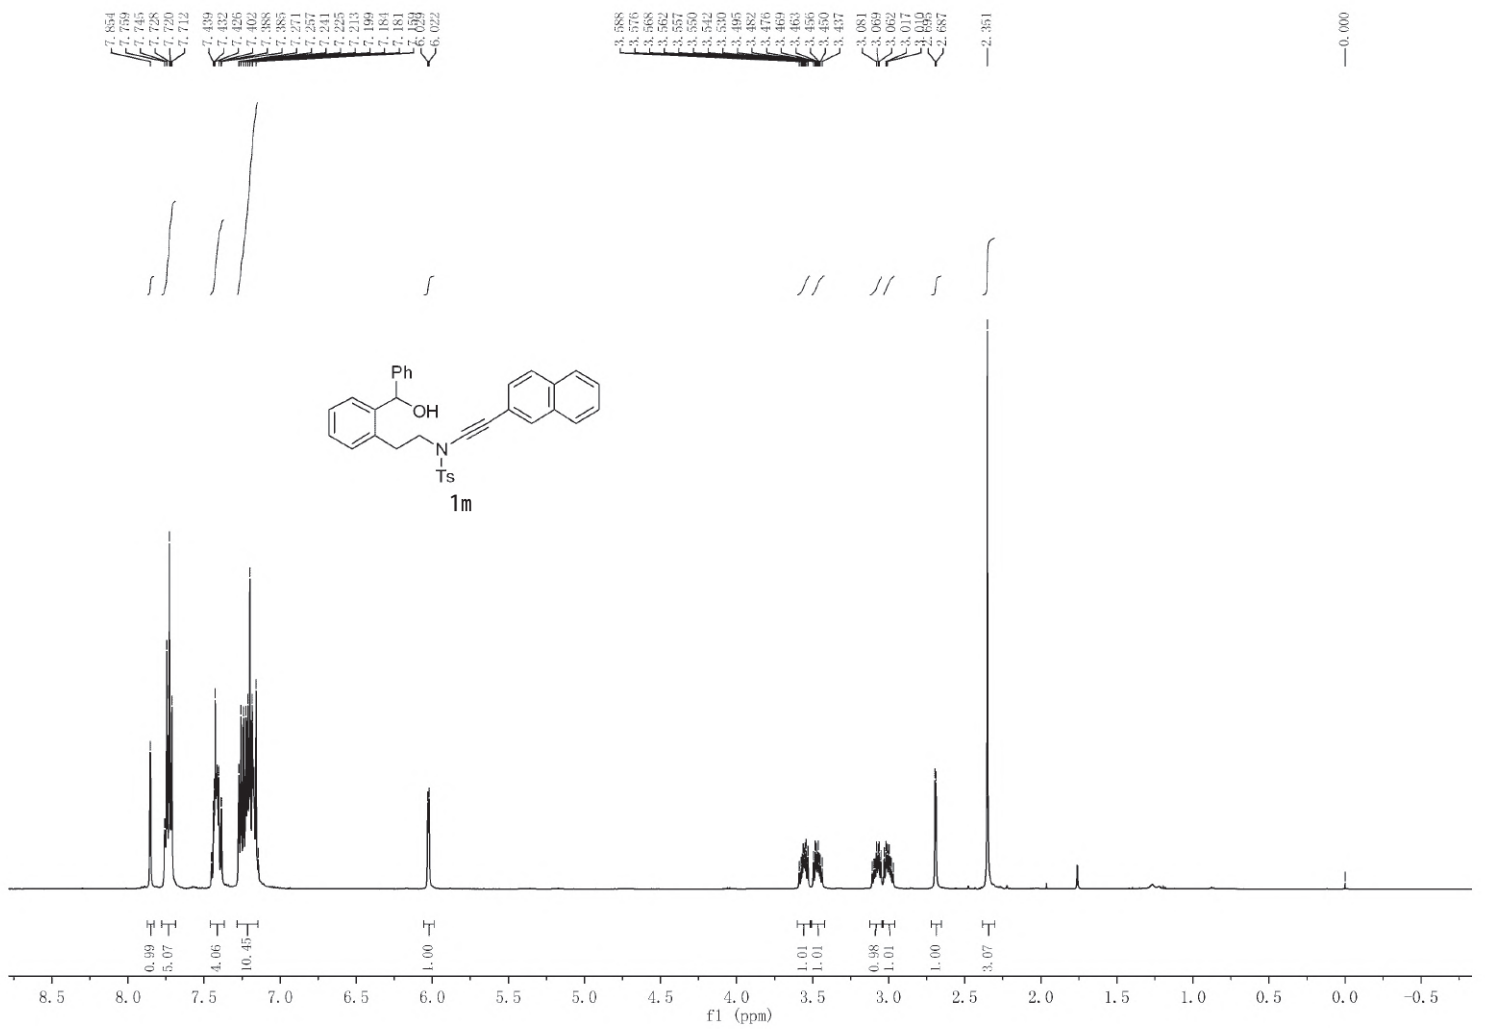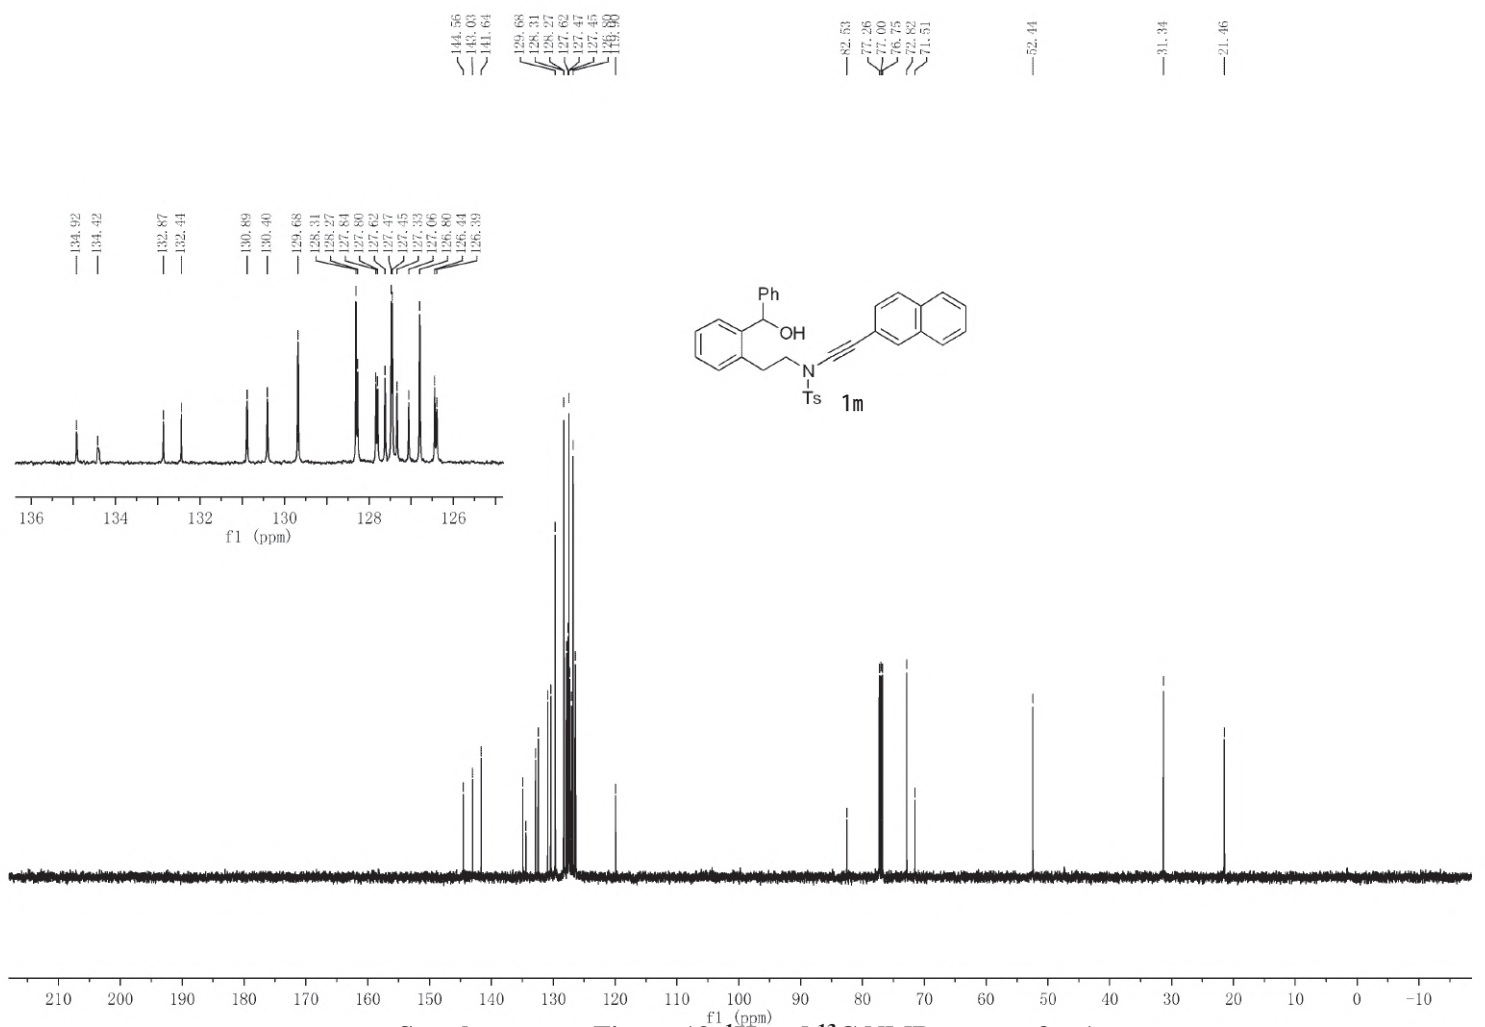

Supplementary Figure 13. <sup>1</sup>H and <sup>13</sup>C NMR spectra for 1m

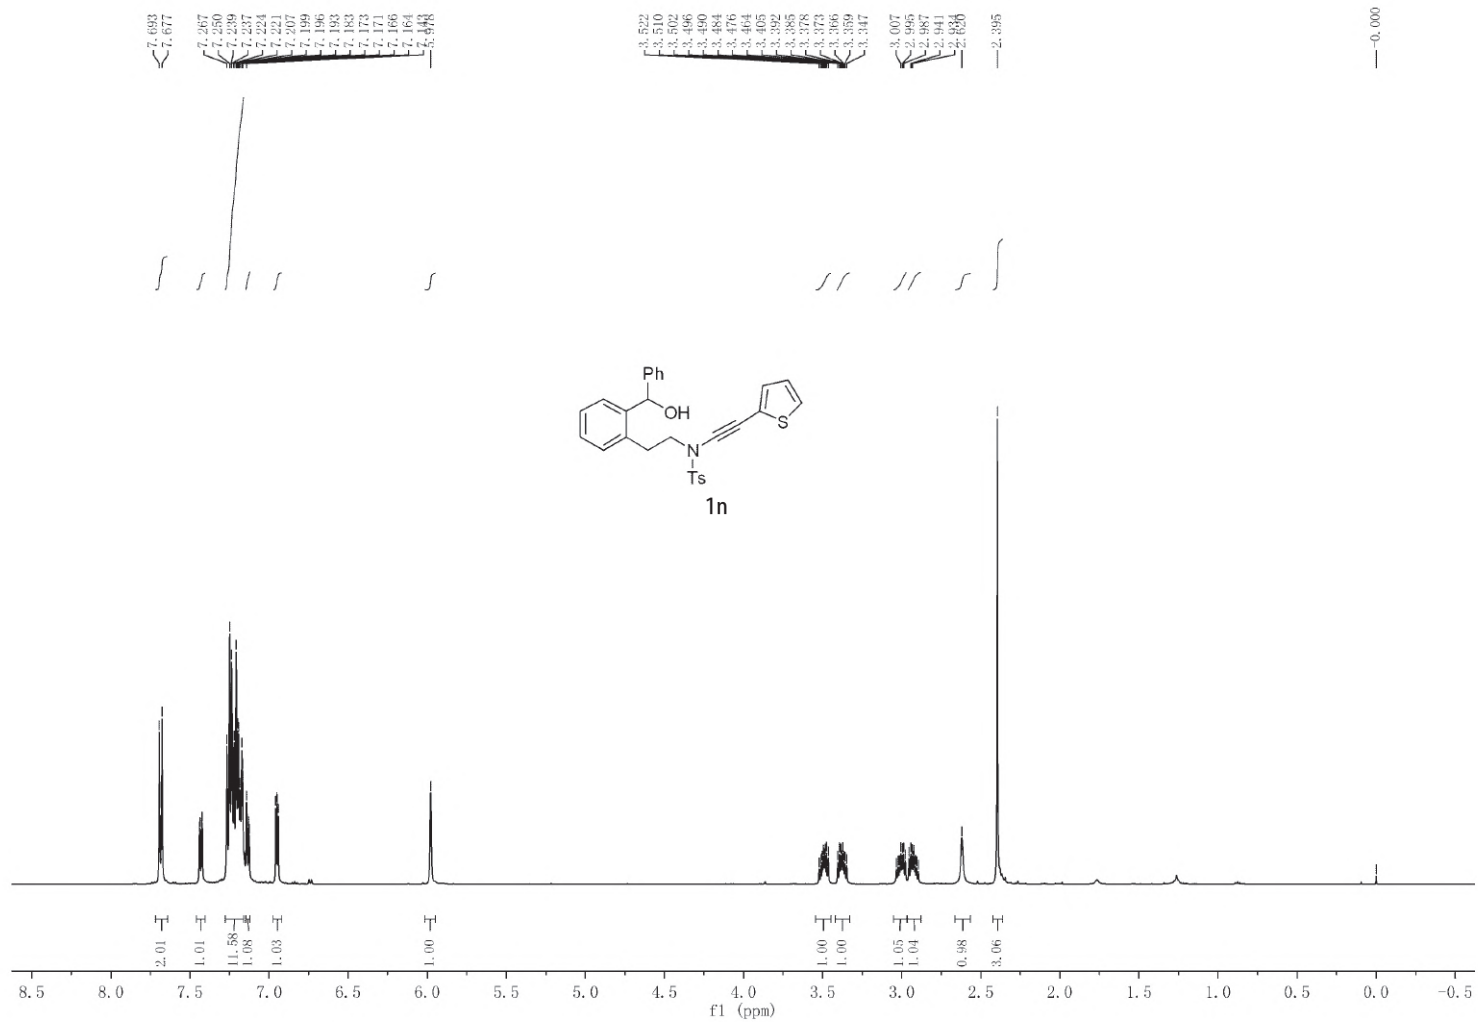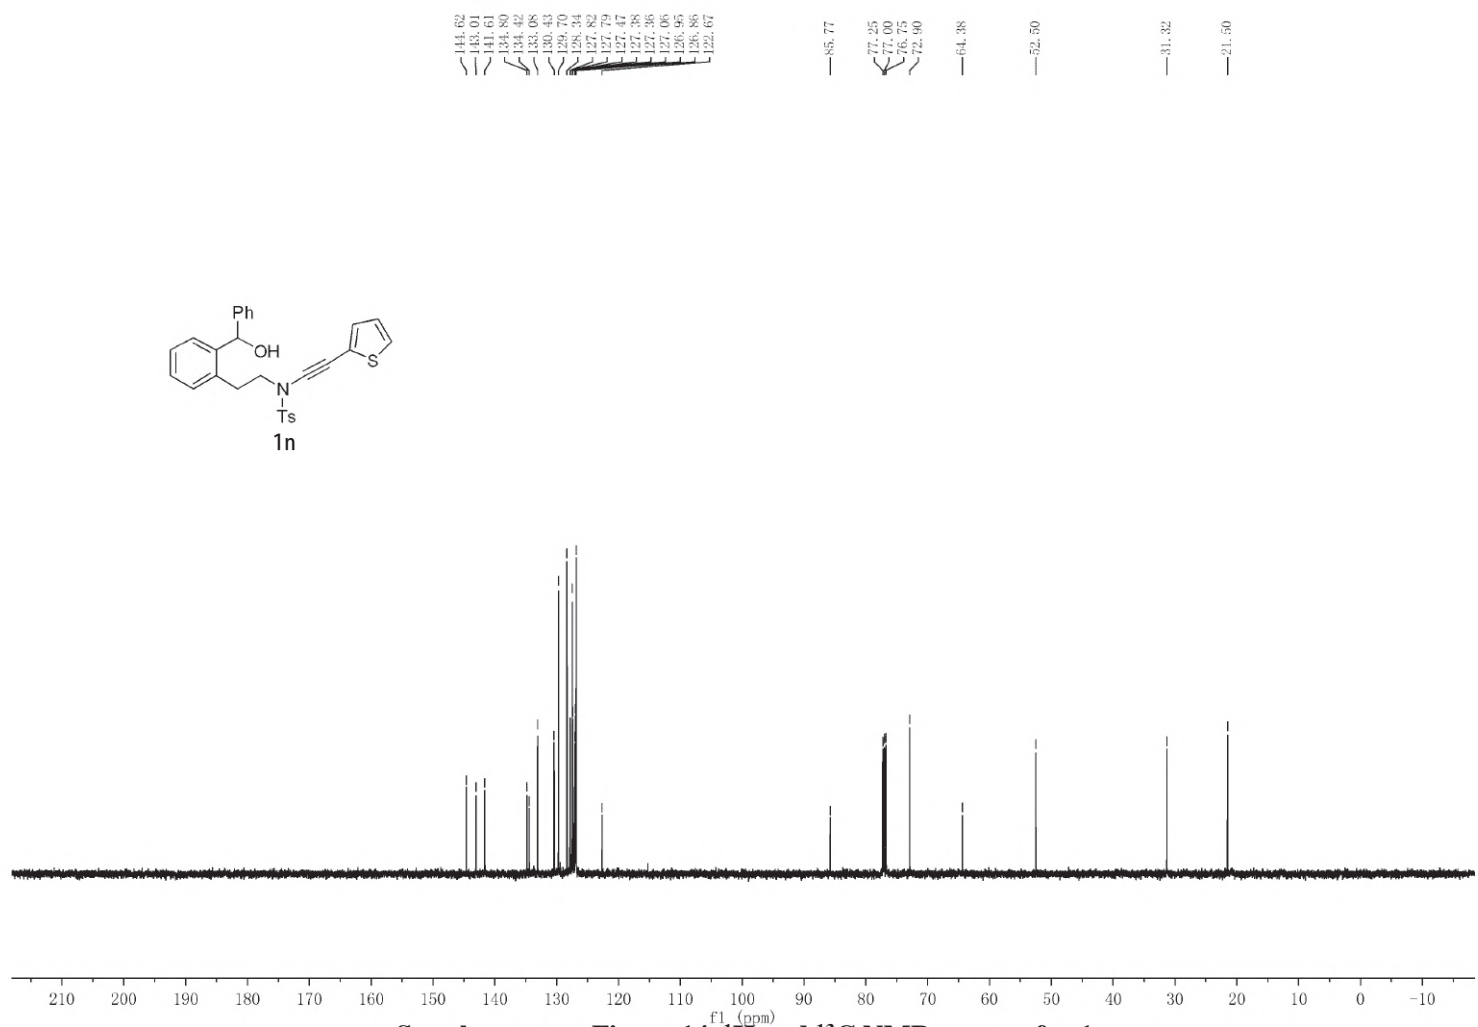

Supplementary Figure 14. <sup>1</sup>H and <sup>13</sup>C NMR spectra for 1n

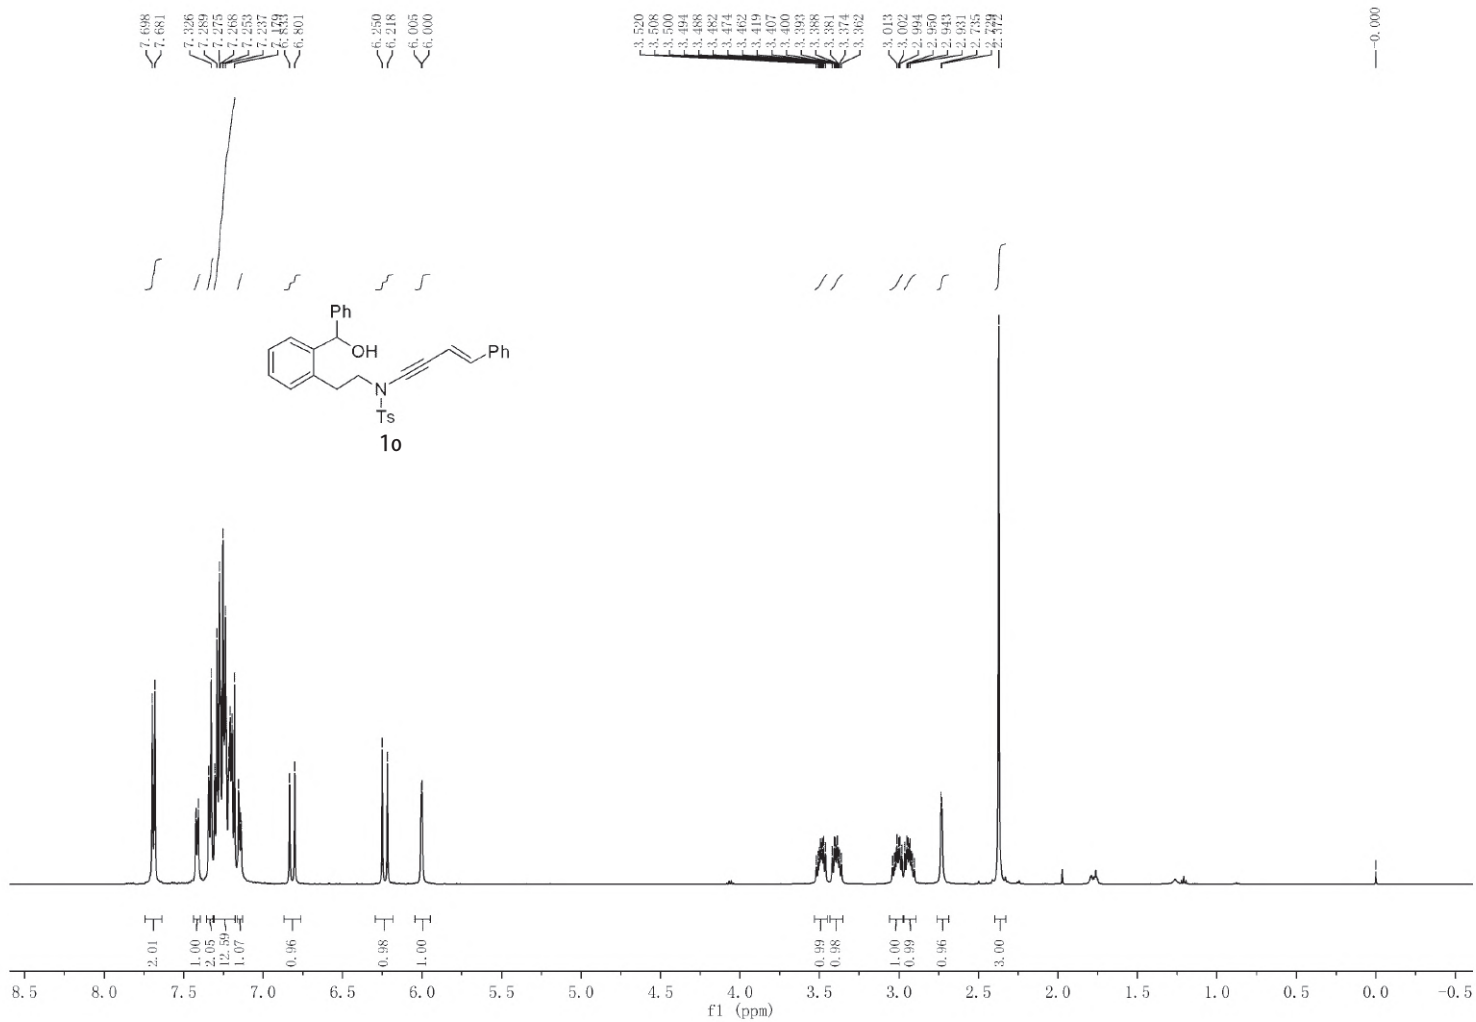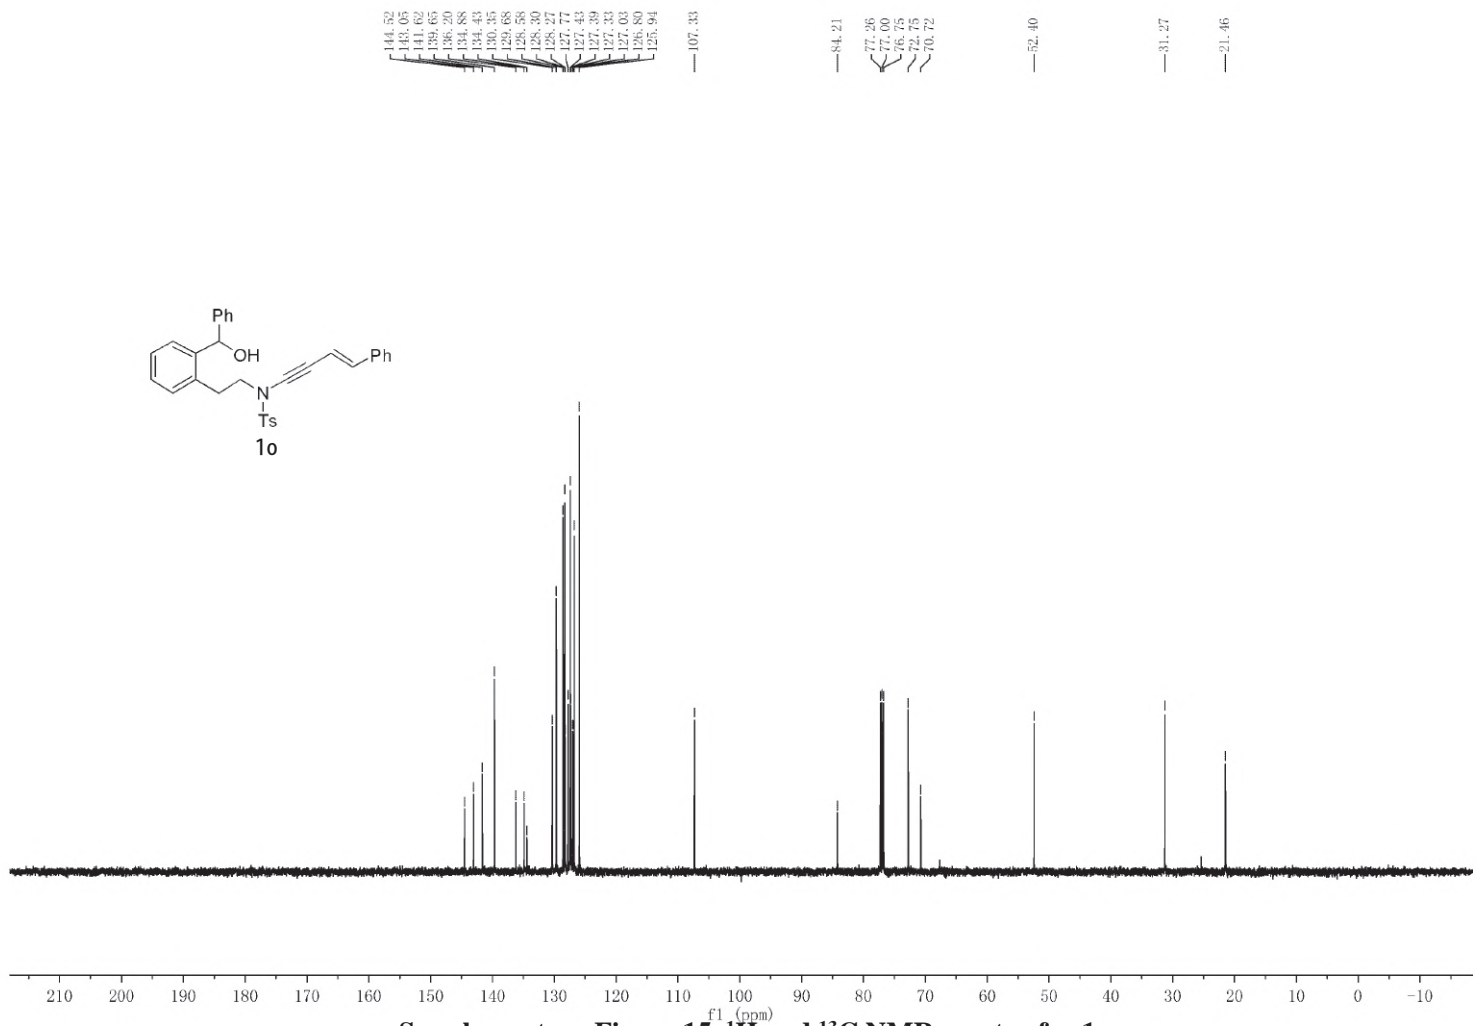

Supplementary Figure 15. <sup>1</sup>H and <sup>13</sup>C NMR spectra for 1o



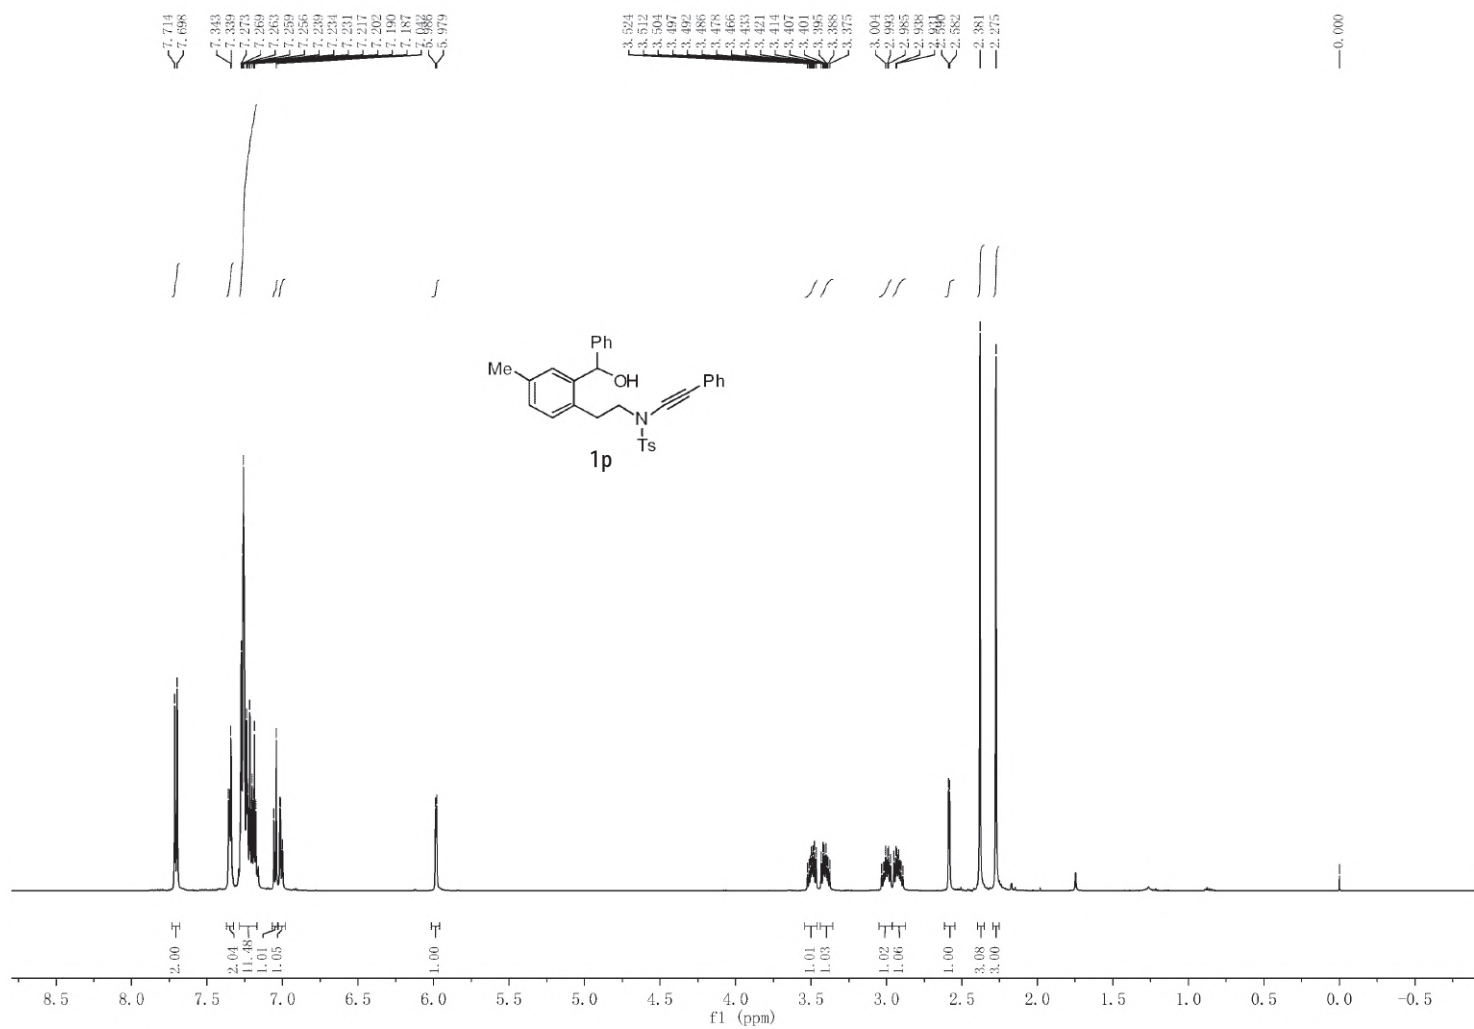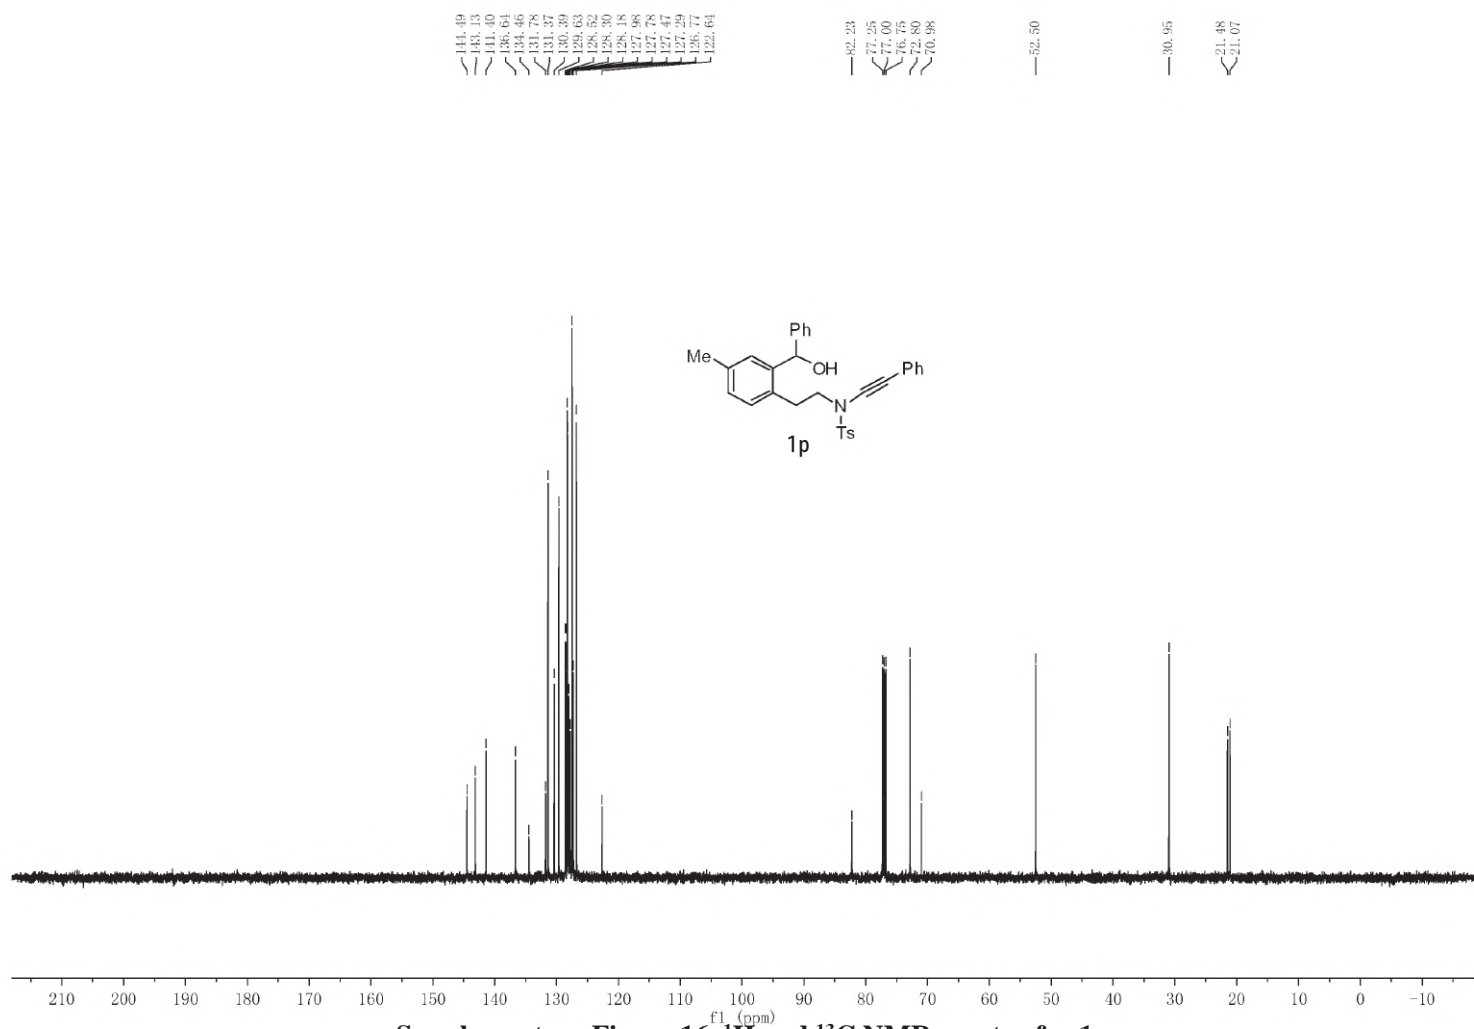

Supplementary Figure 16. <sup>1</sup>H and <sup>13</sup>C NMR spectra for 1p

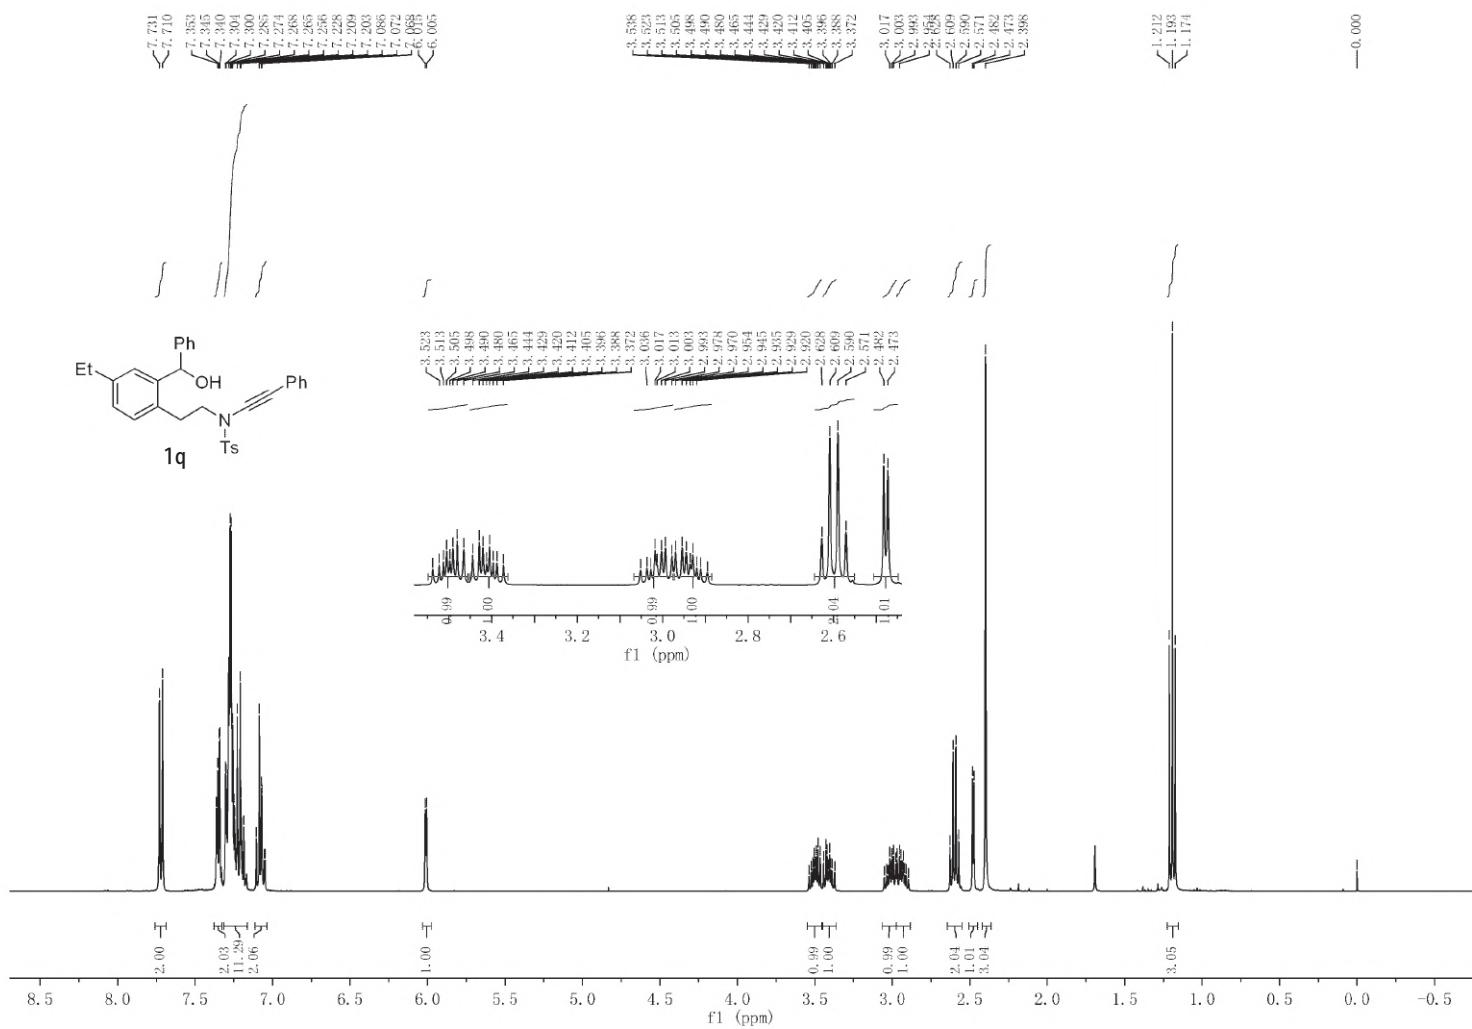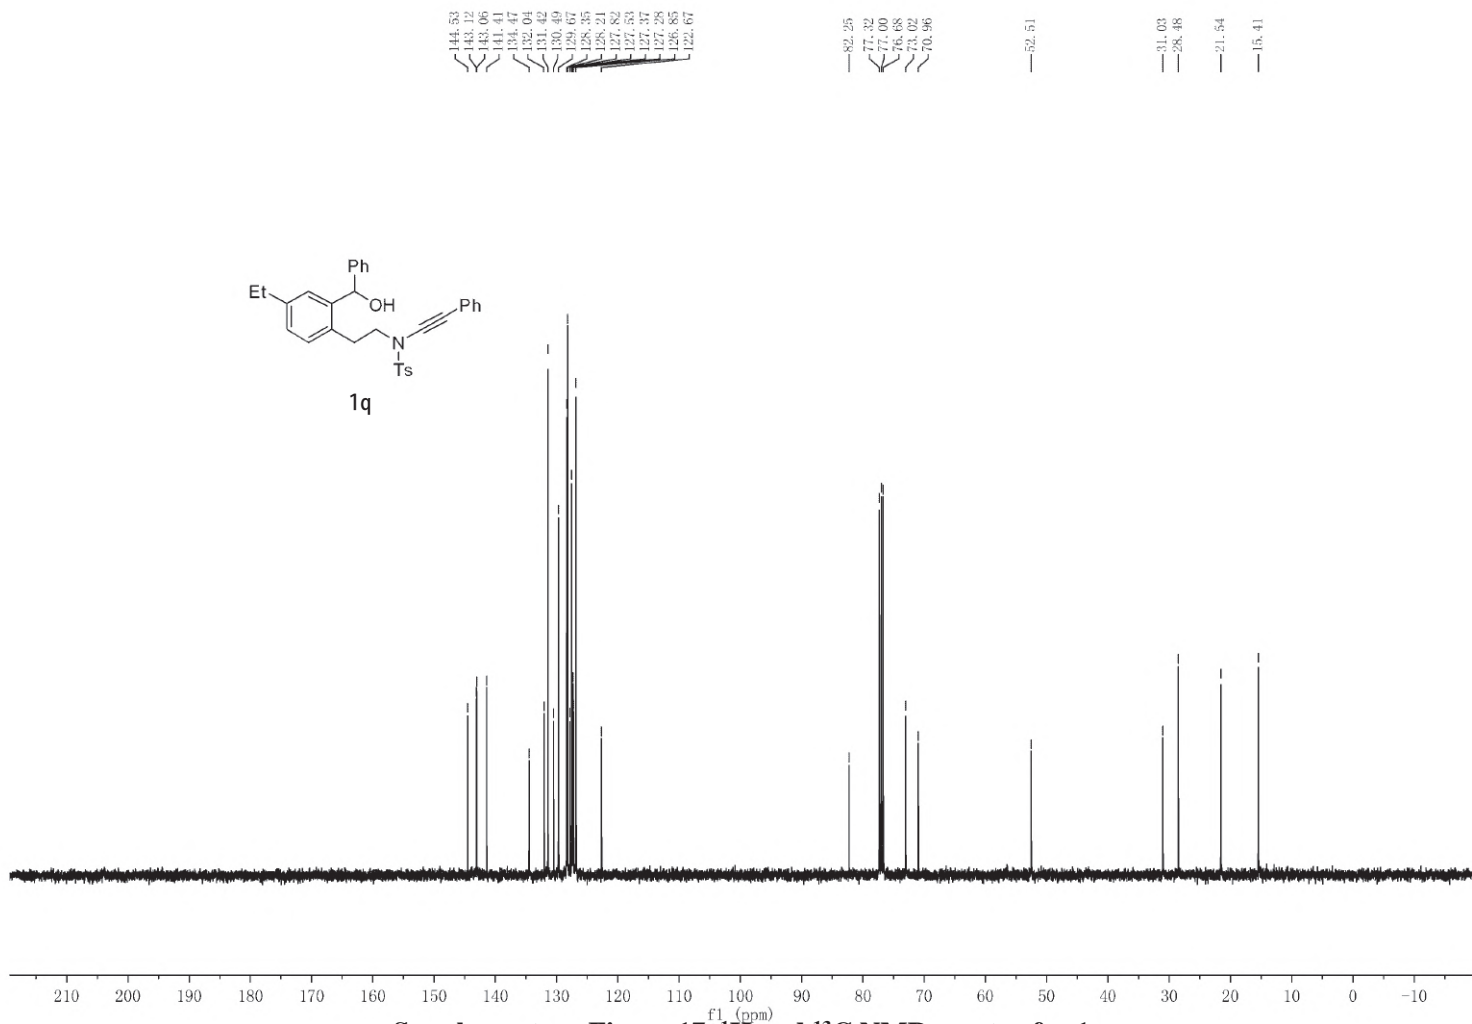

Supplementary Figure 17. <sup>1</sup>H and <sup>13</sup>C NMR spectra for 1q

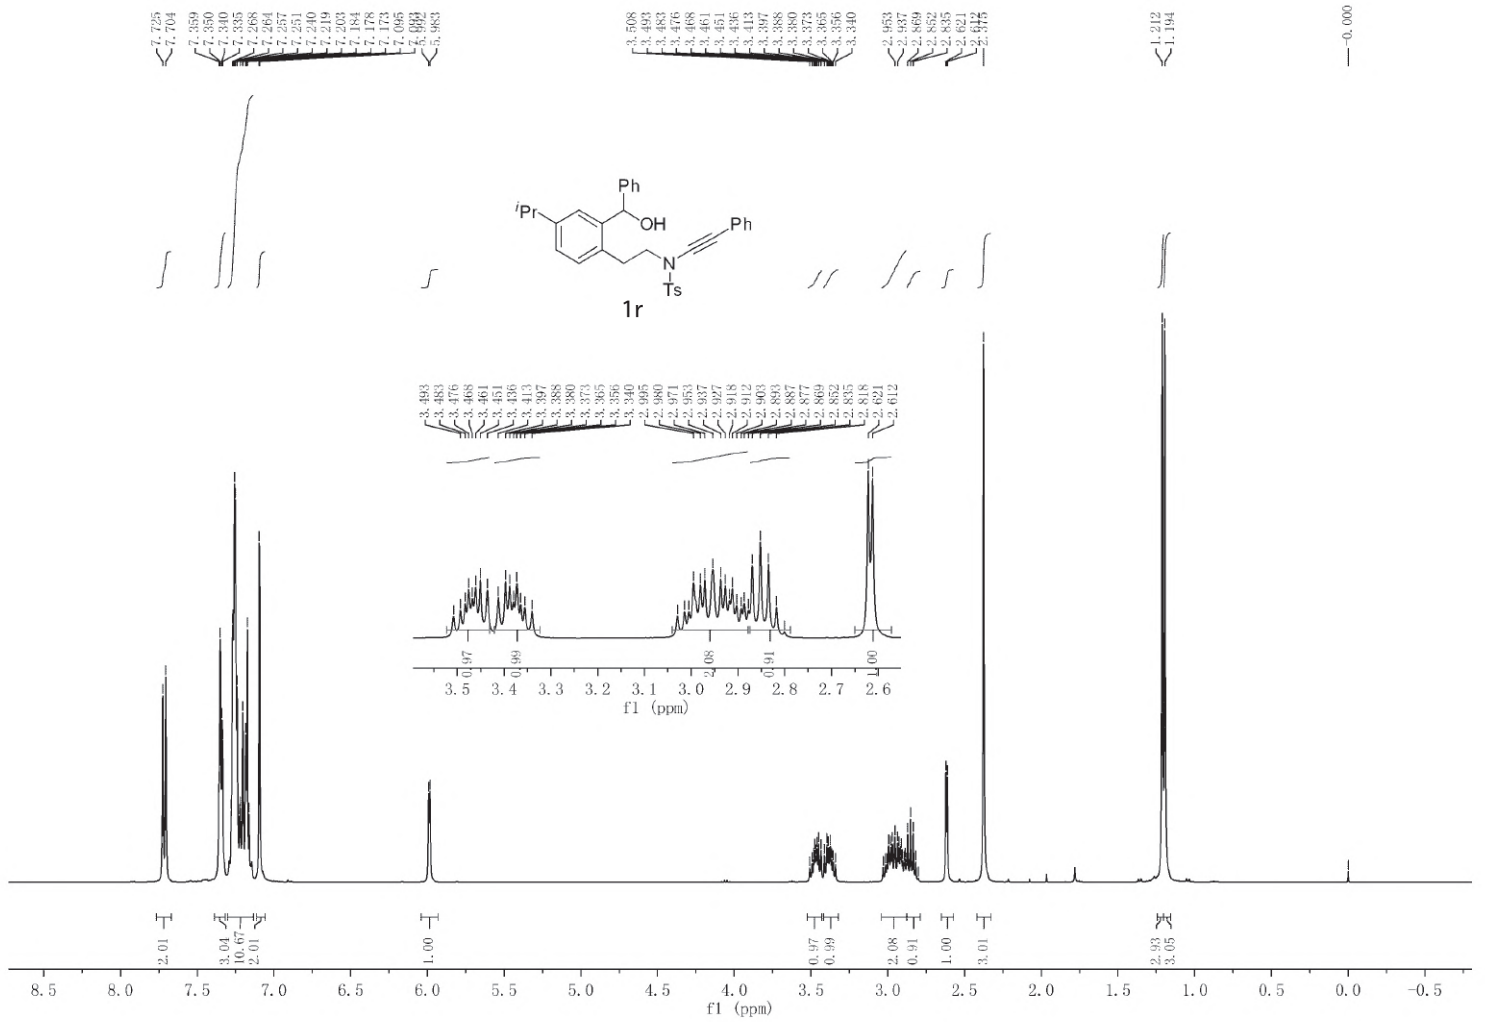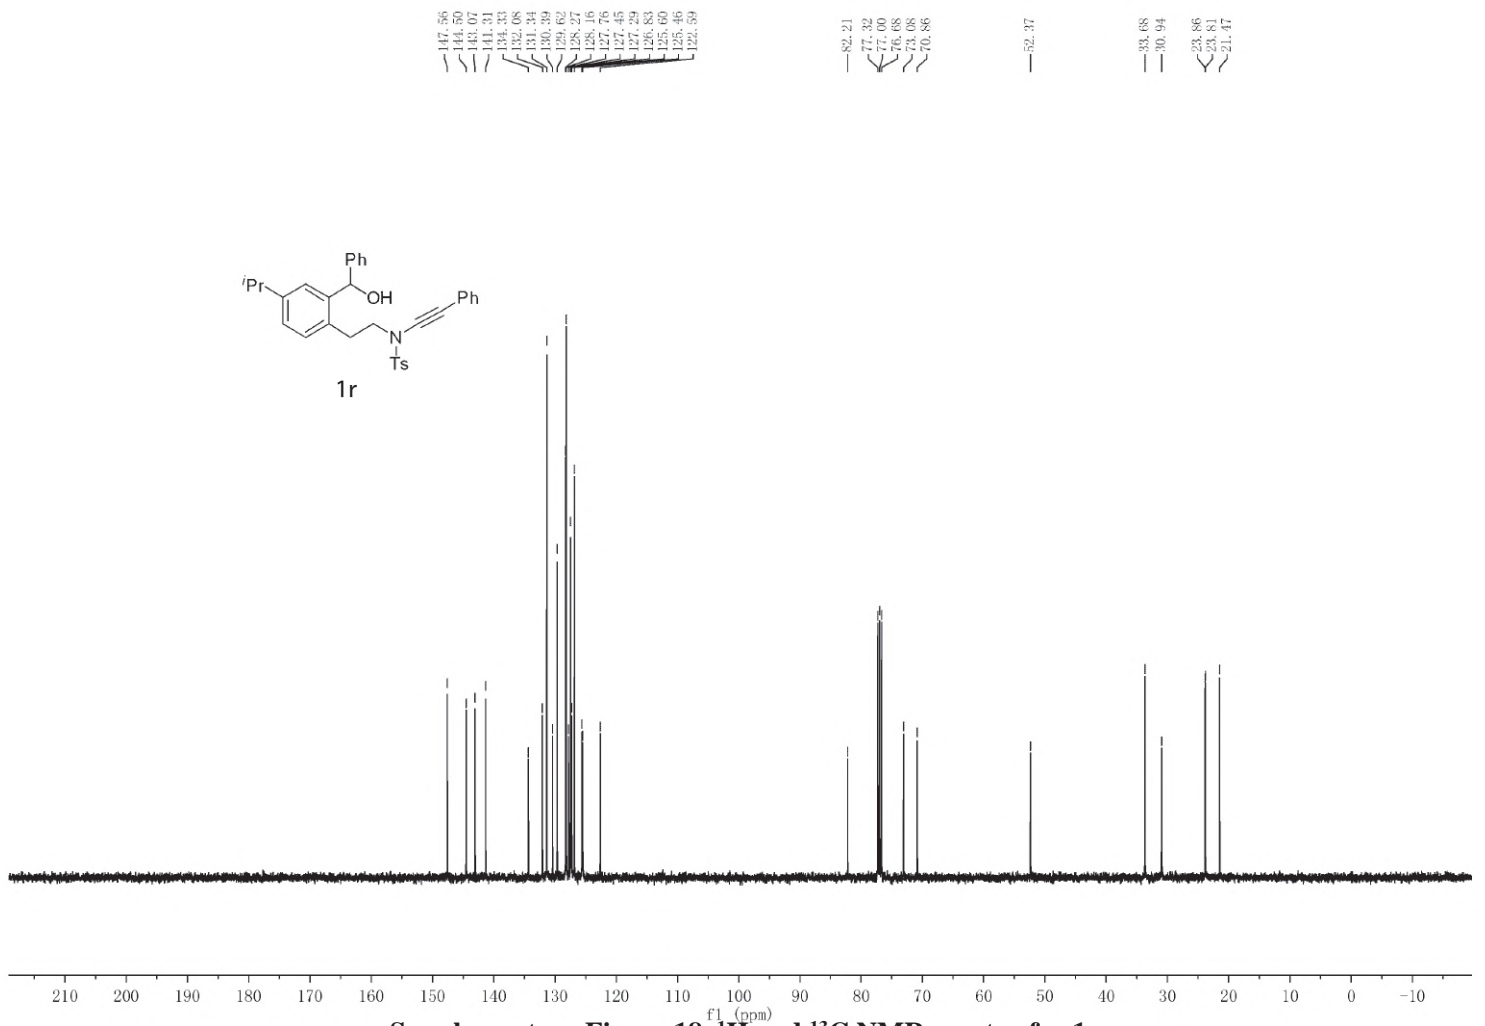

Supplementary Figure 18. <sup>1</sup>H and <sup>13</sup>C NMR spectra for 1r

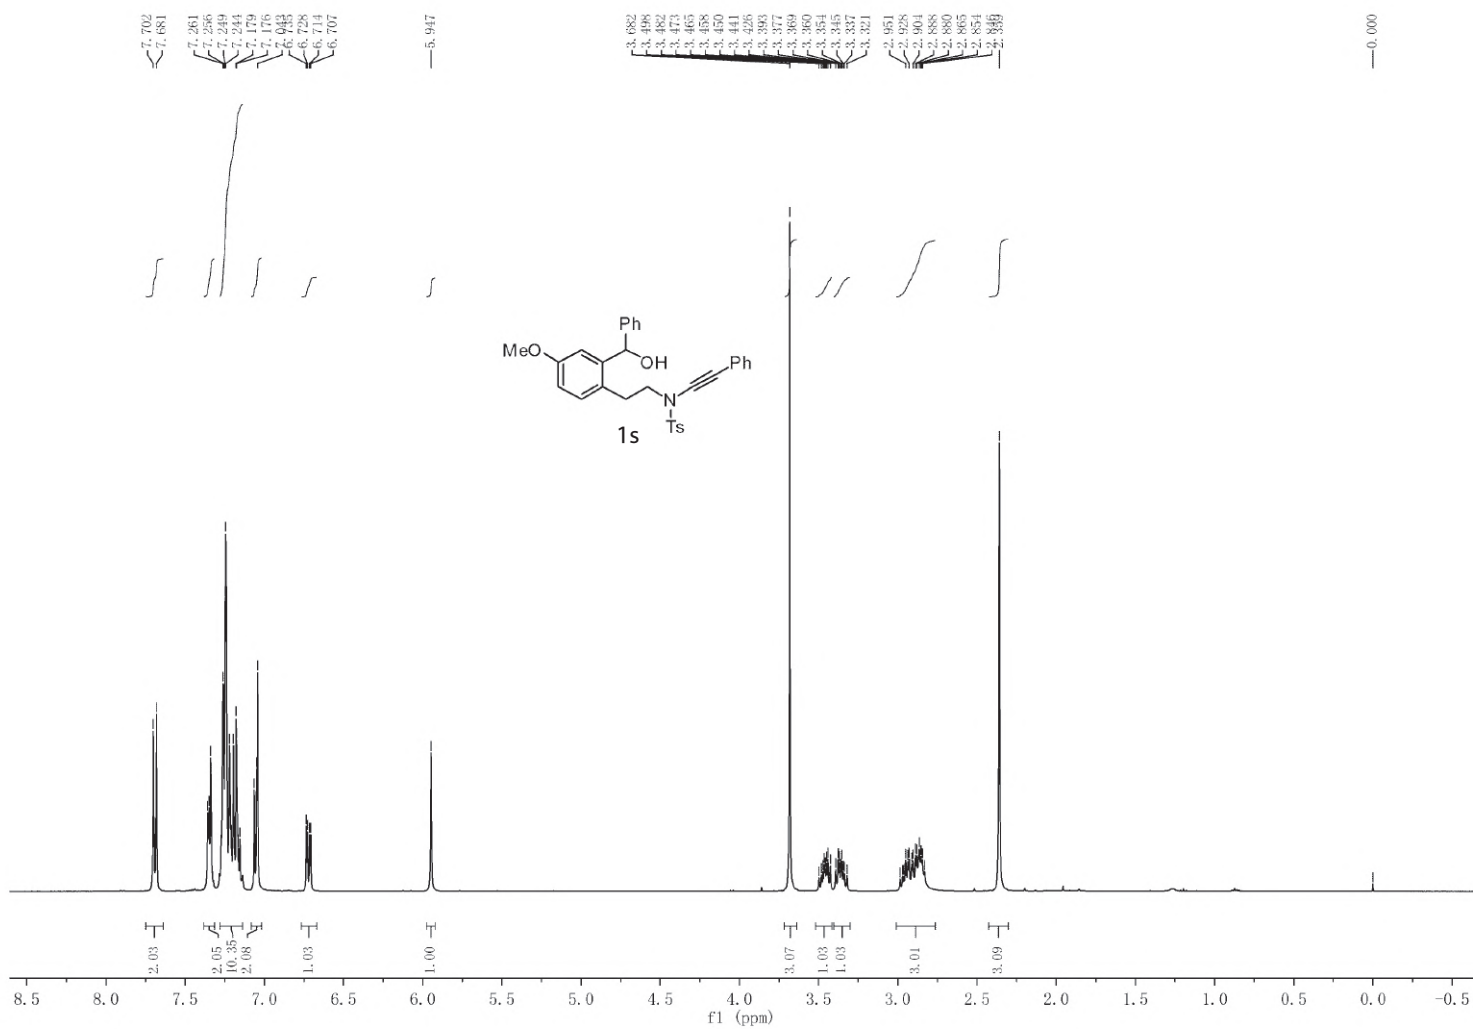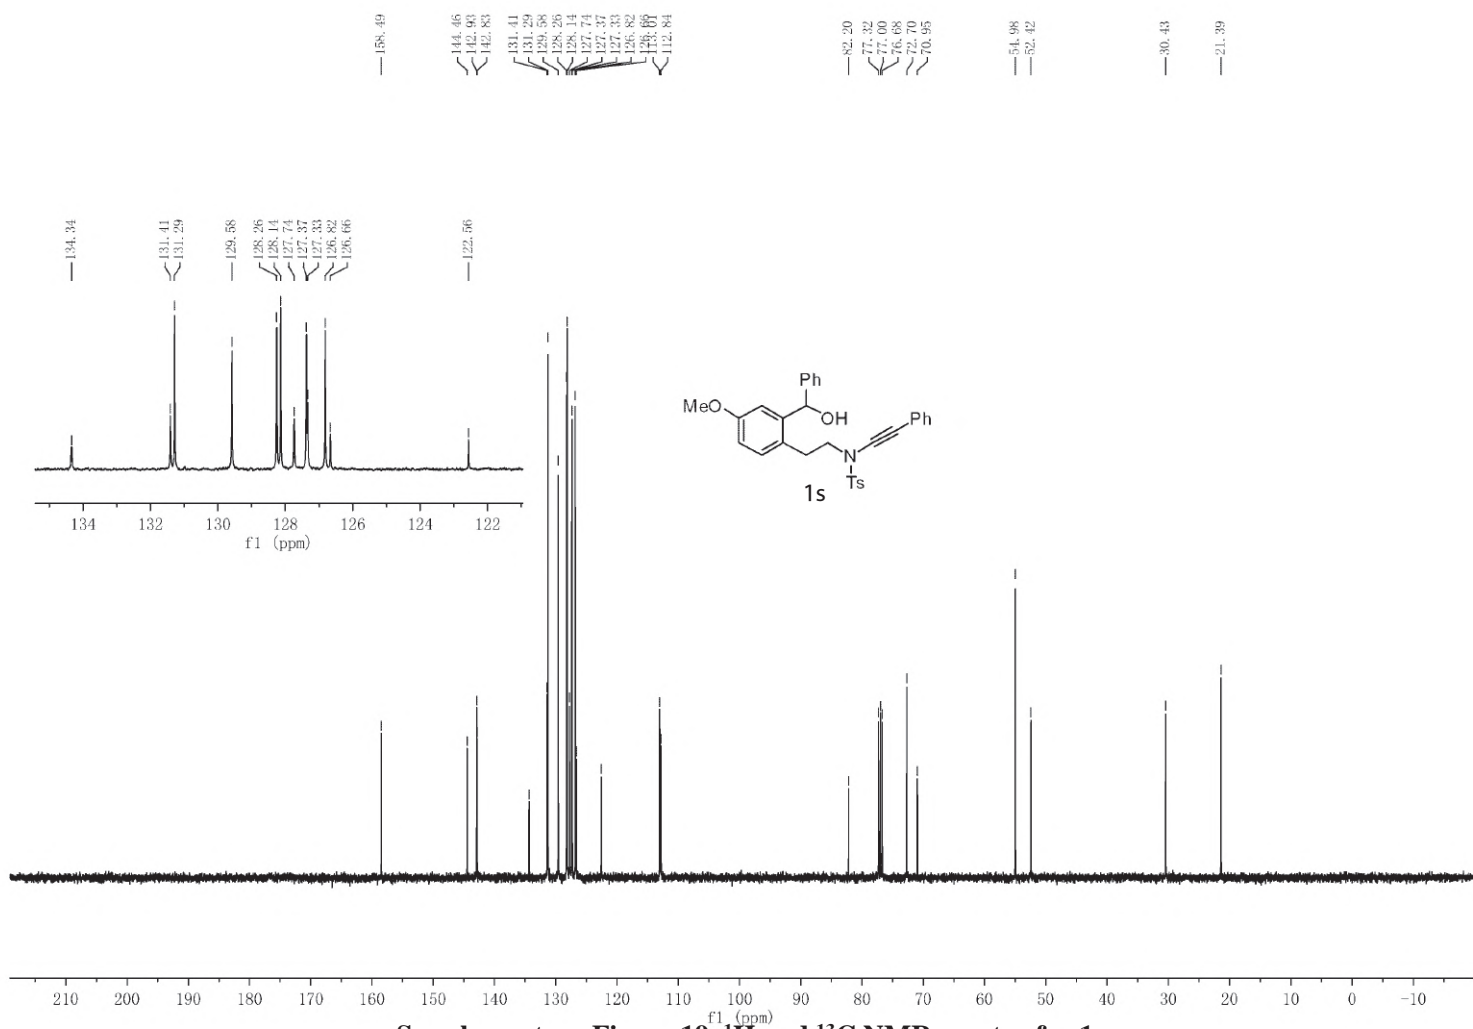

Supplementary Figure 19. <sup>1</sup>H and <sup>13</sup>C NMR spectra for **1s**

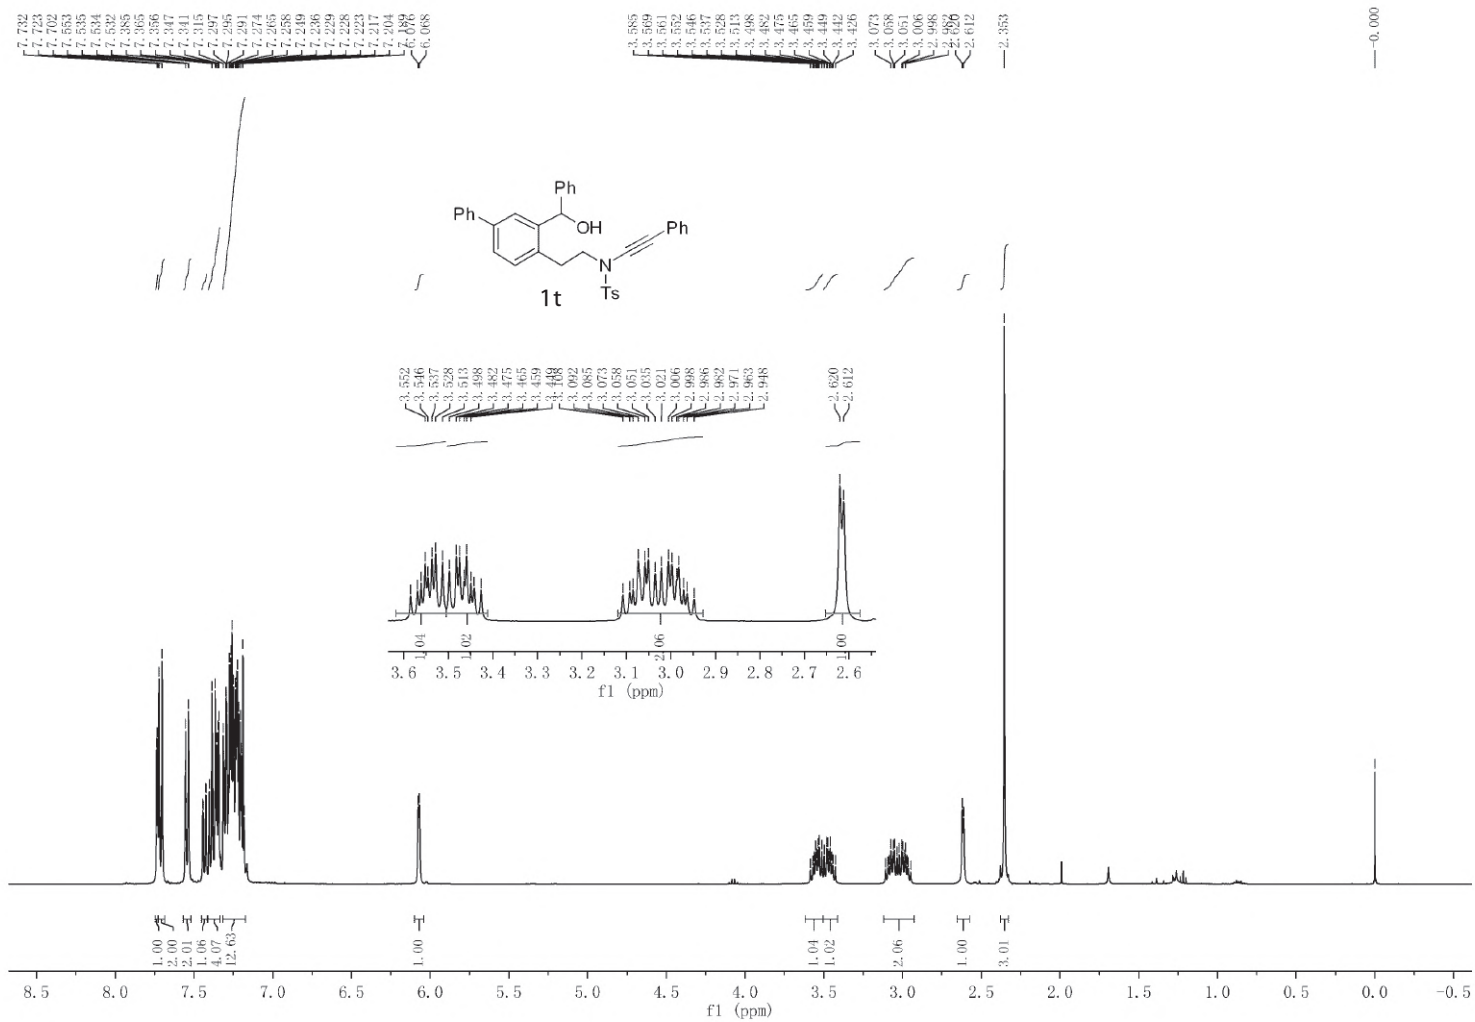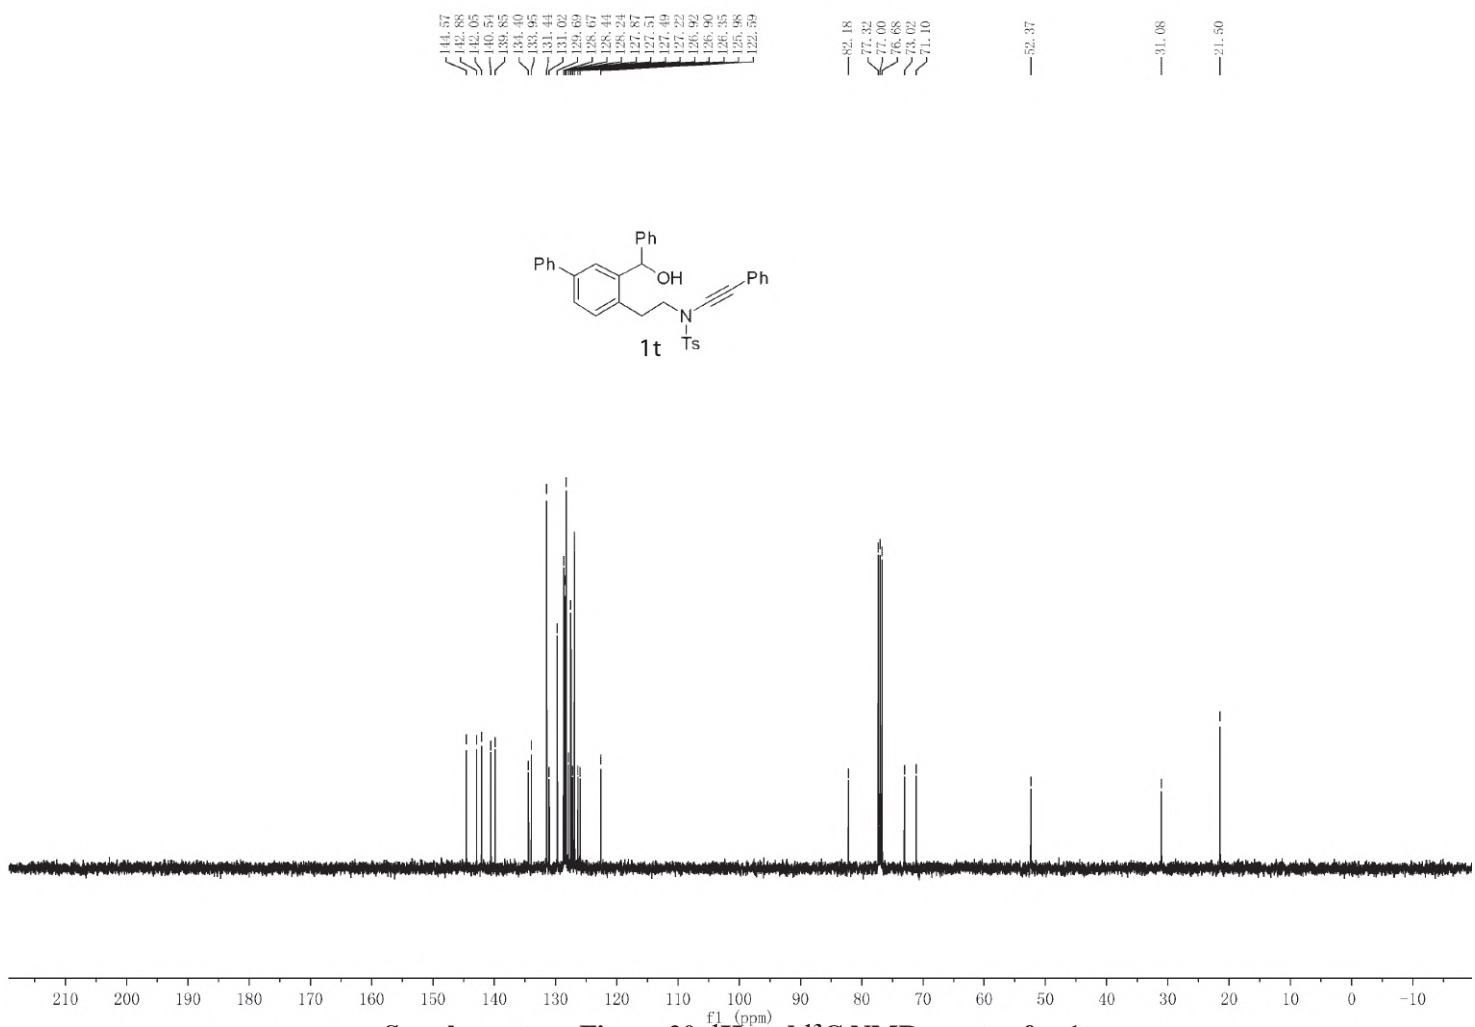

Supplementary Figure 20. <sup>1</sup>H and <sup>13</sup>C NMR spectra for 1t

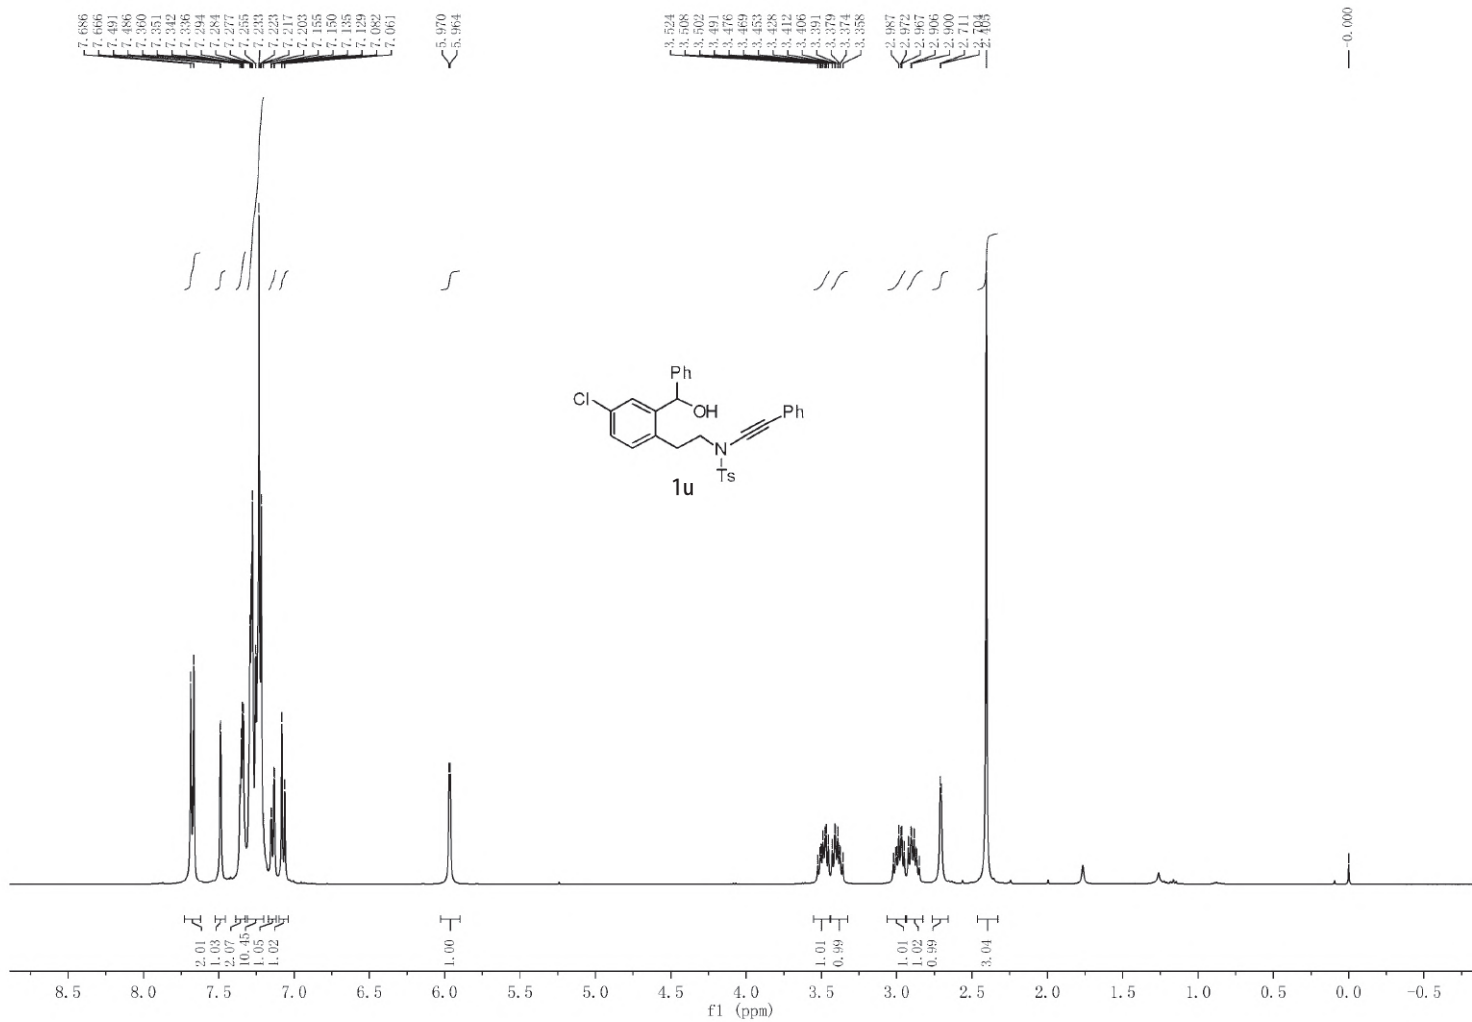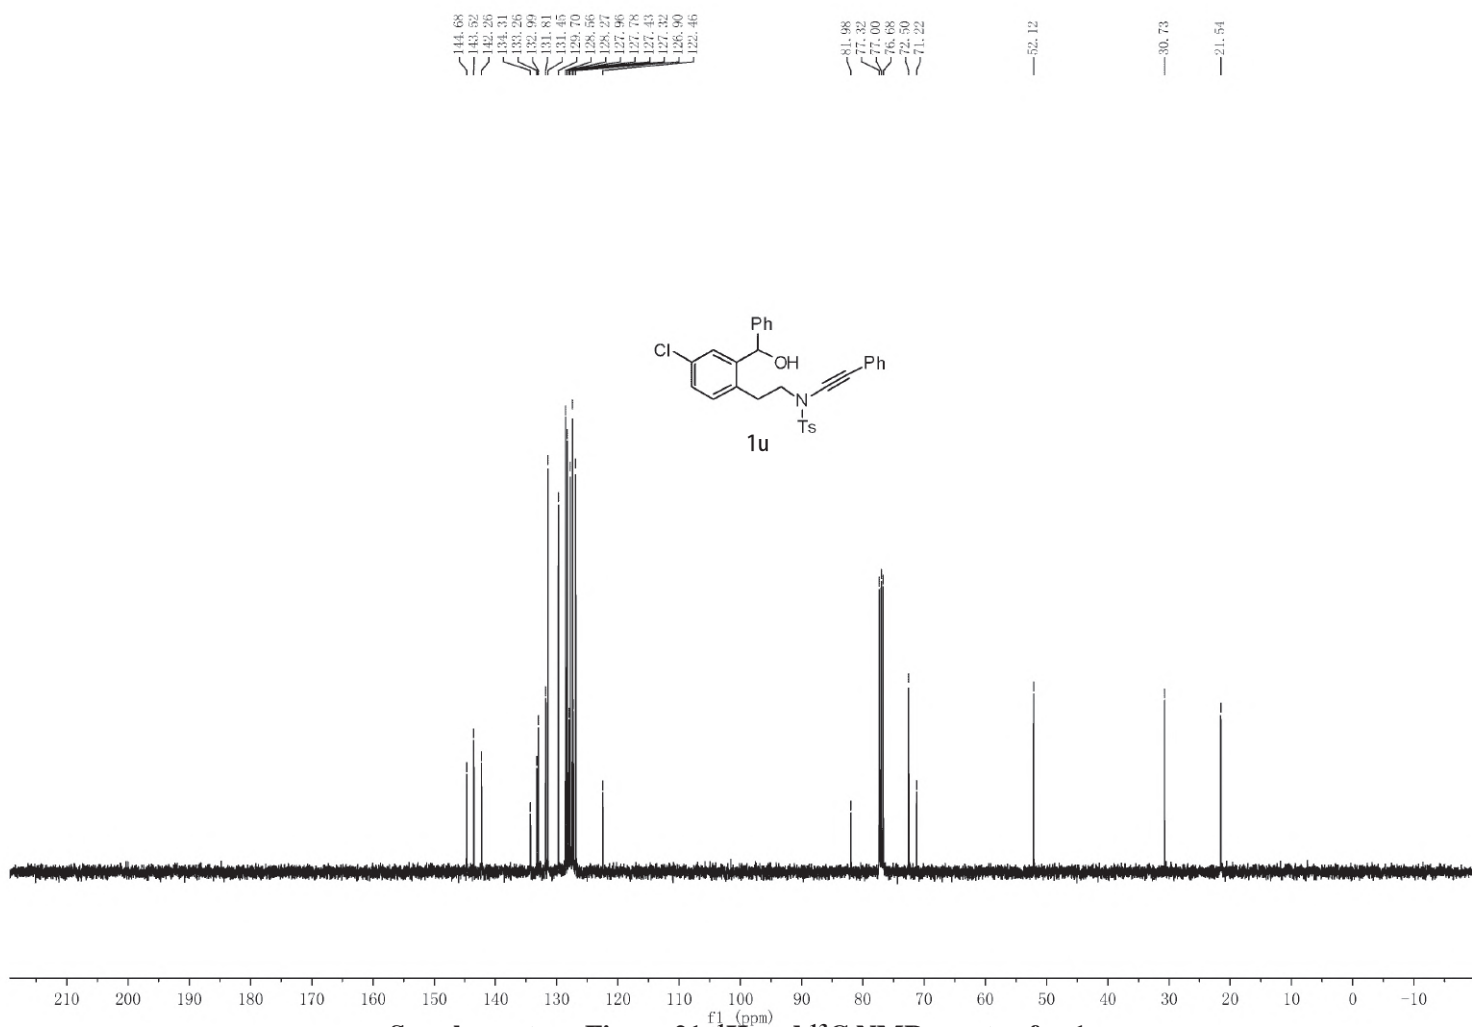

Supplementary Figure 21. <sup>1</sup>H and <sup>13</sup>C NMR spectra for 1u

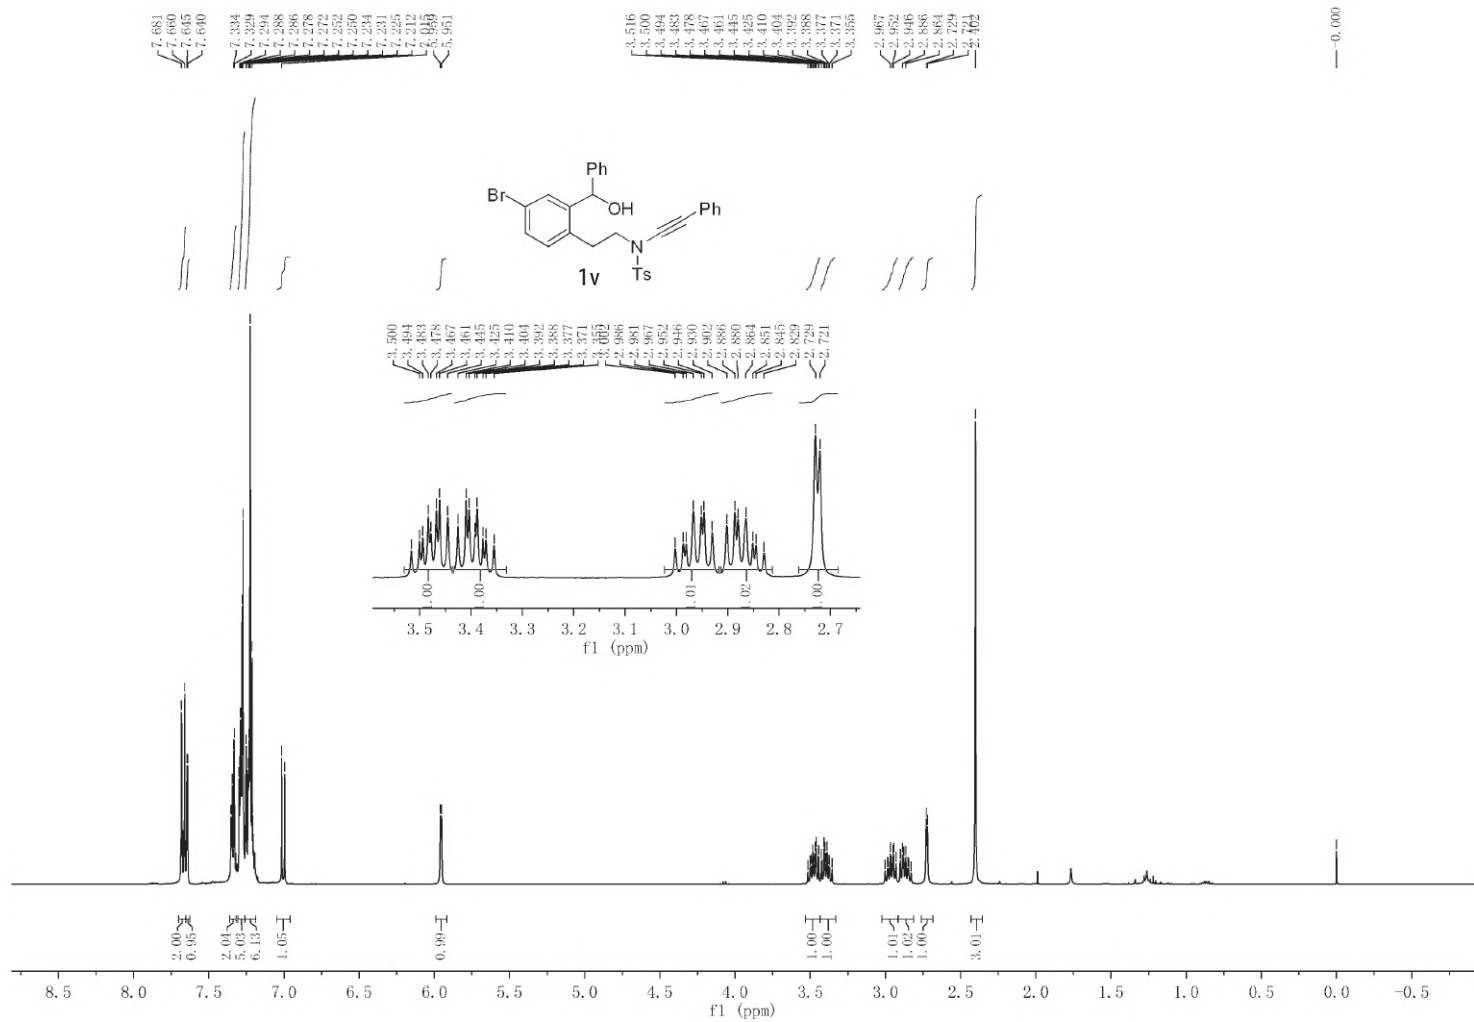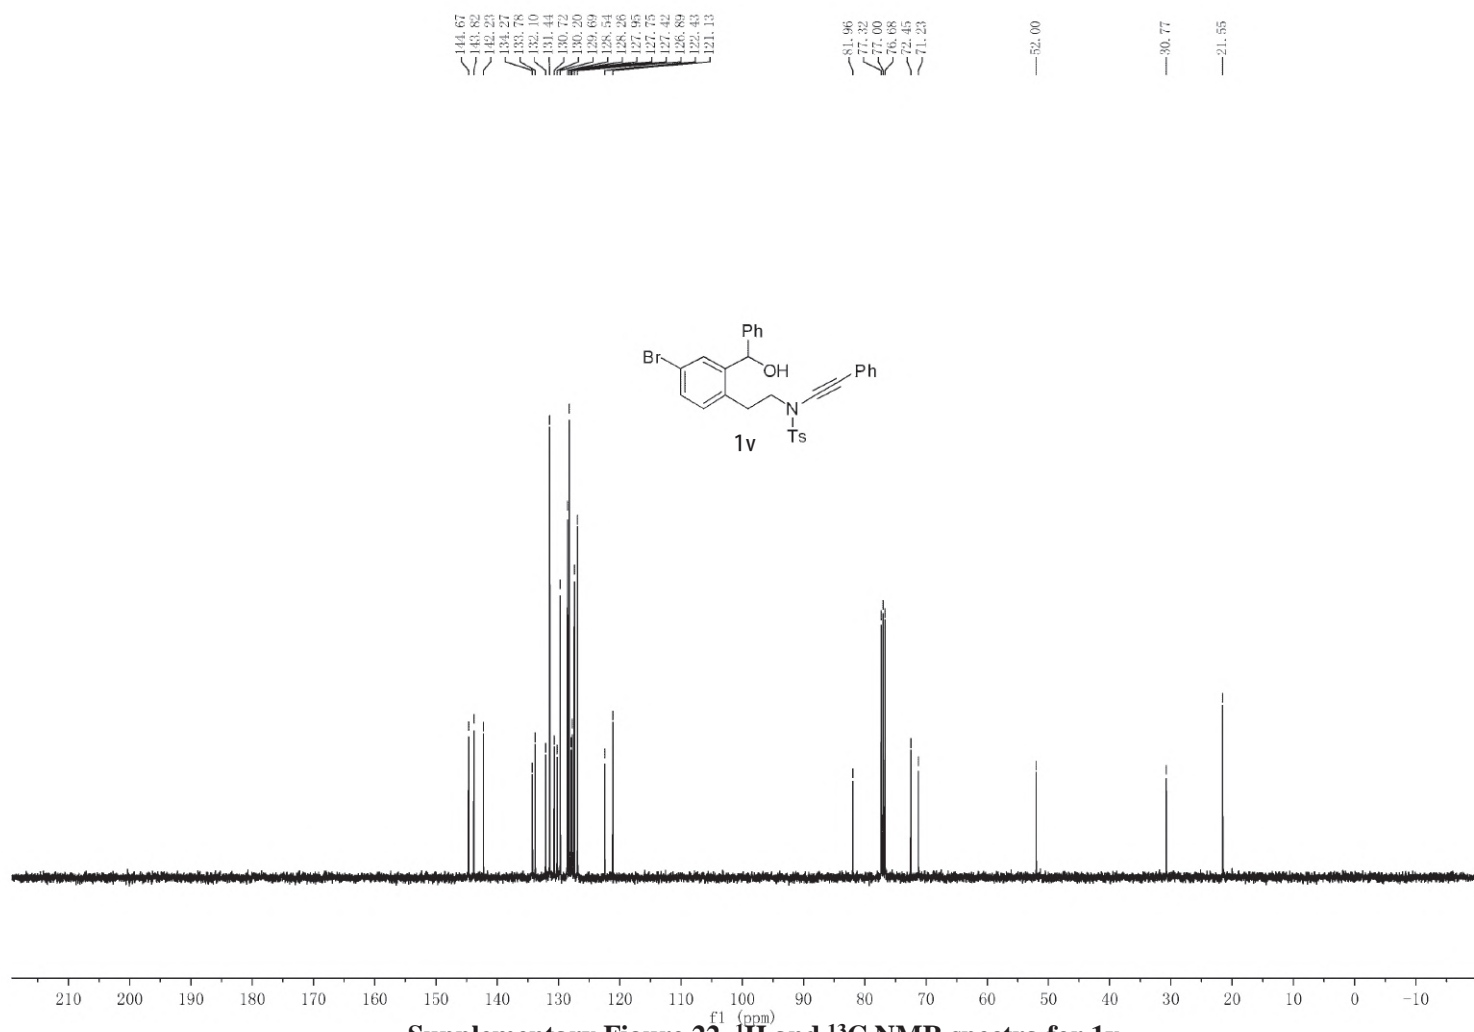

Supplementary Figure 22.  $^1\text{H}$  and  $^{13}\text{C}$  NMR spectra for **1v**

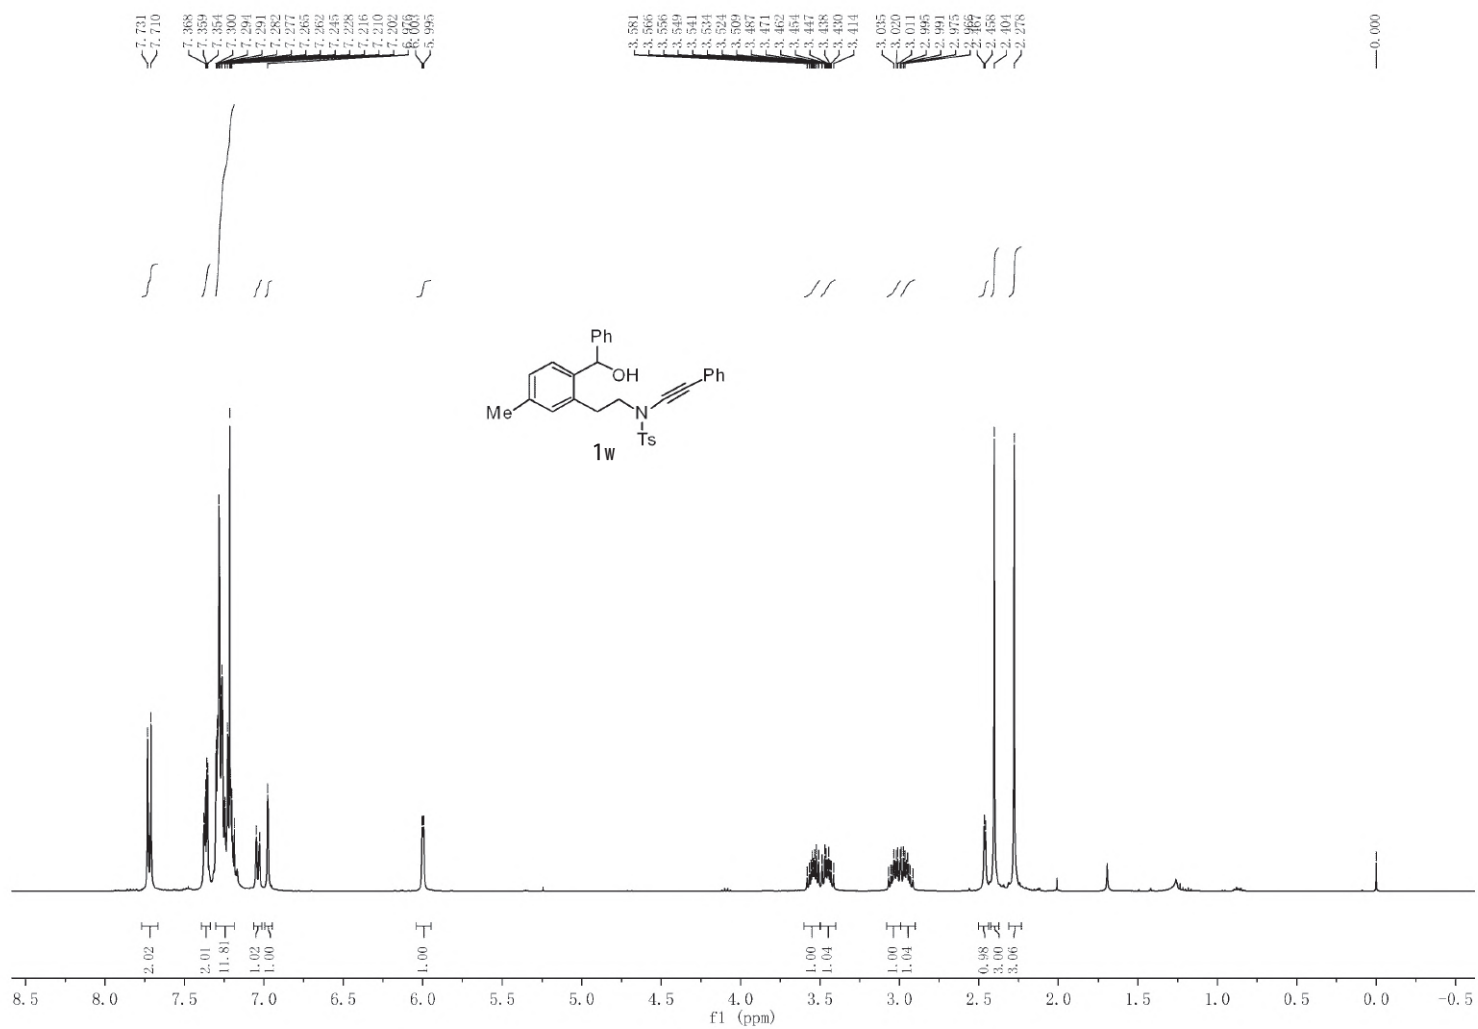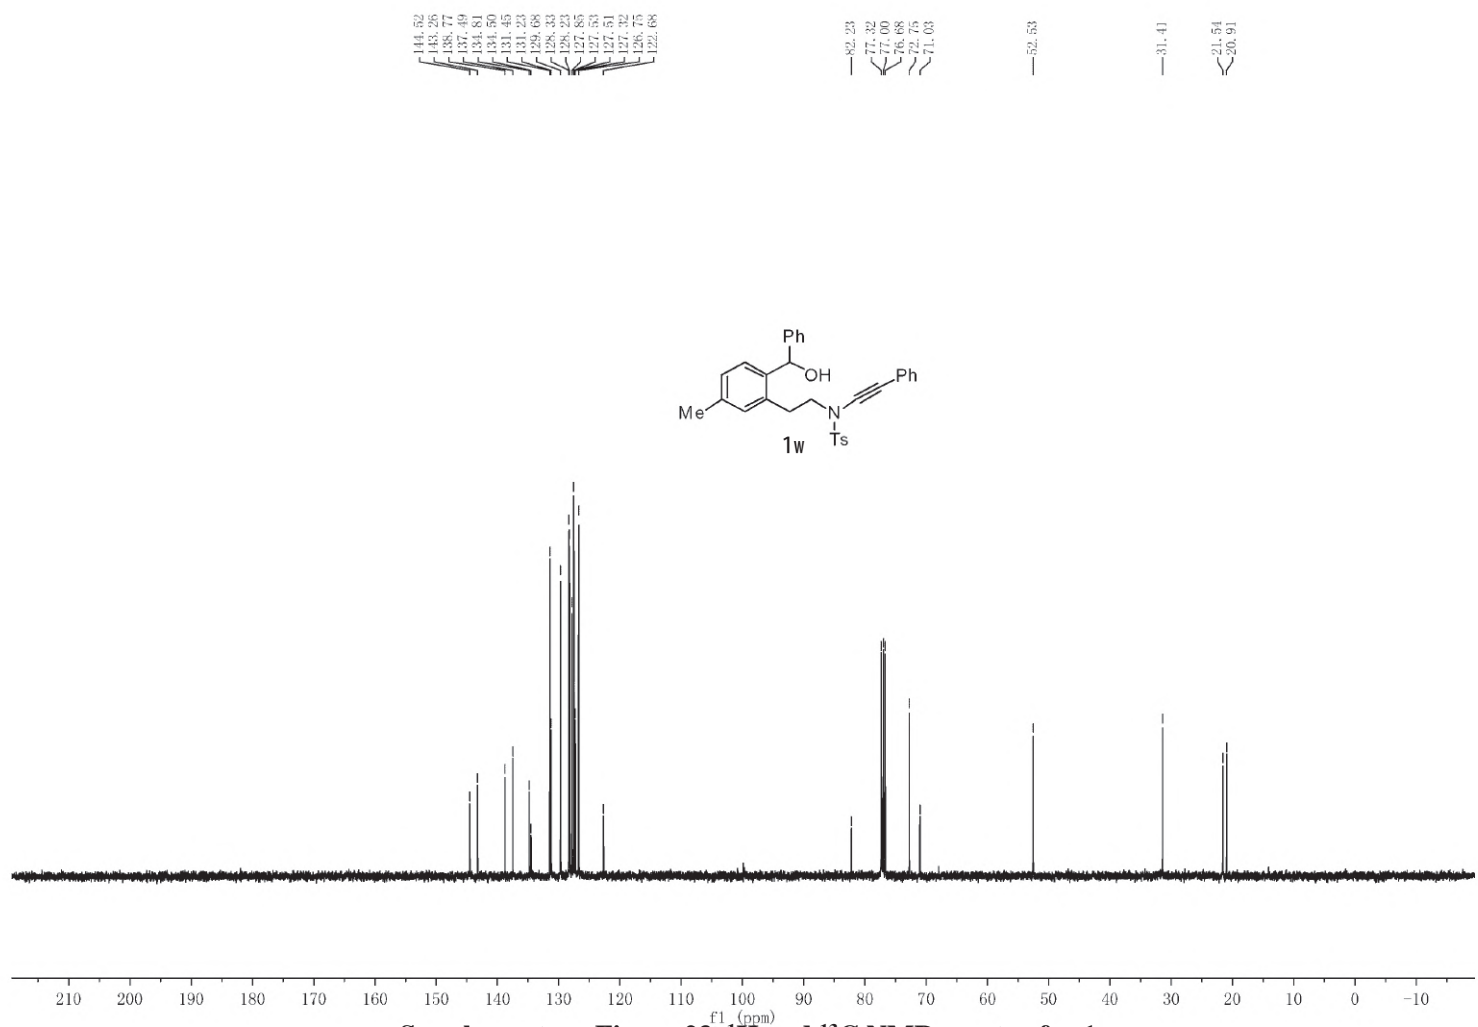

Supplementary Figure 23. <sup>1</sup>H and <sup>13</sup>C NMR spectra for **1w**



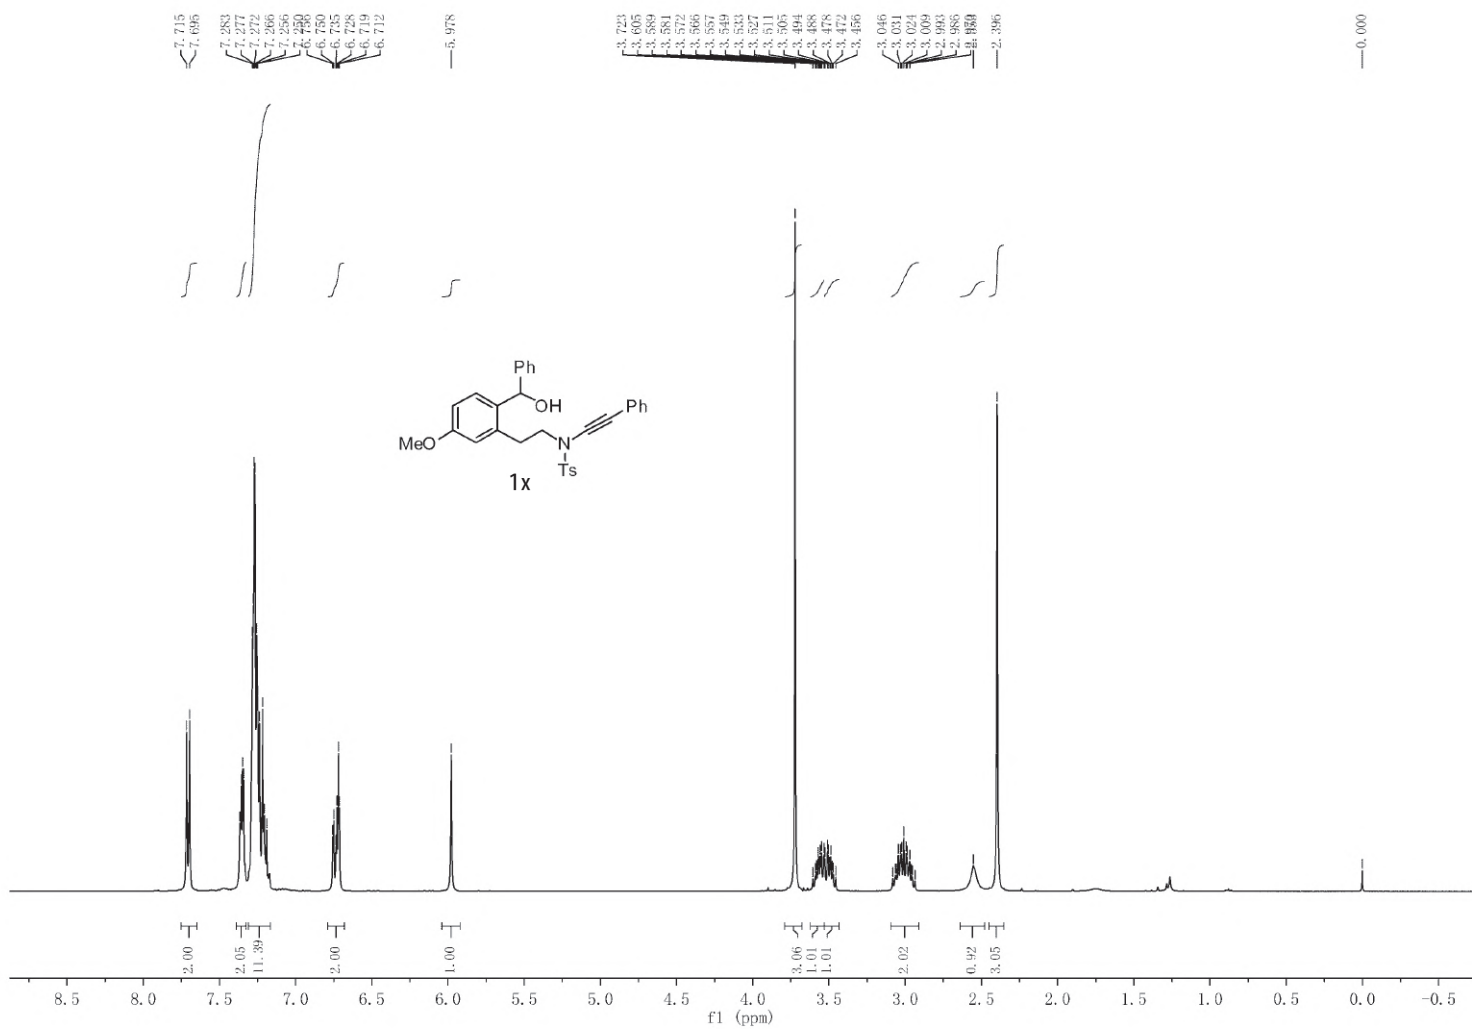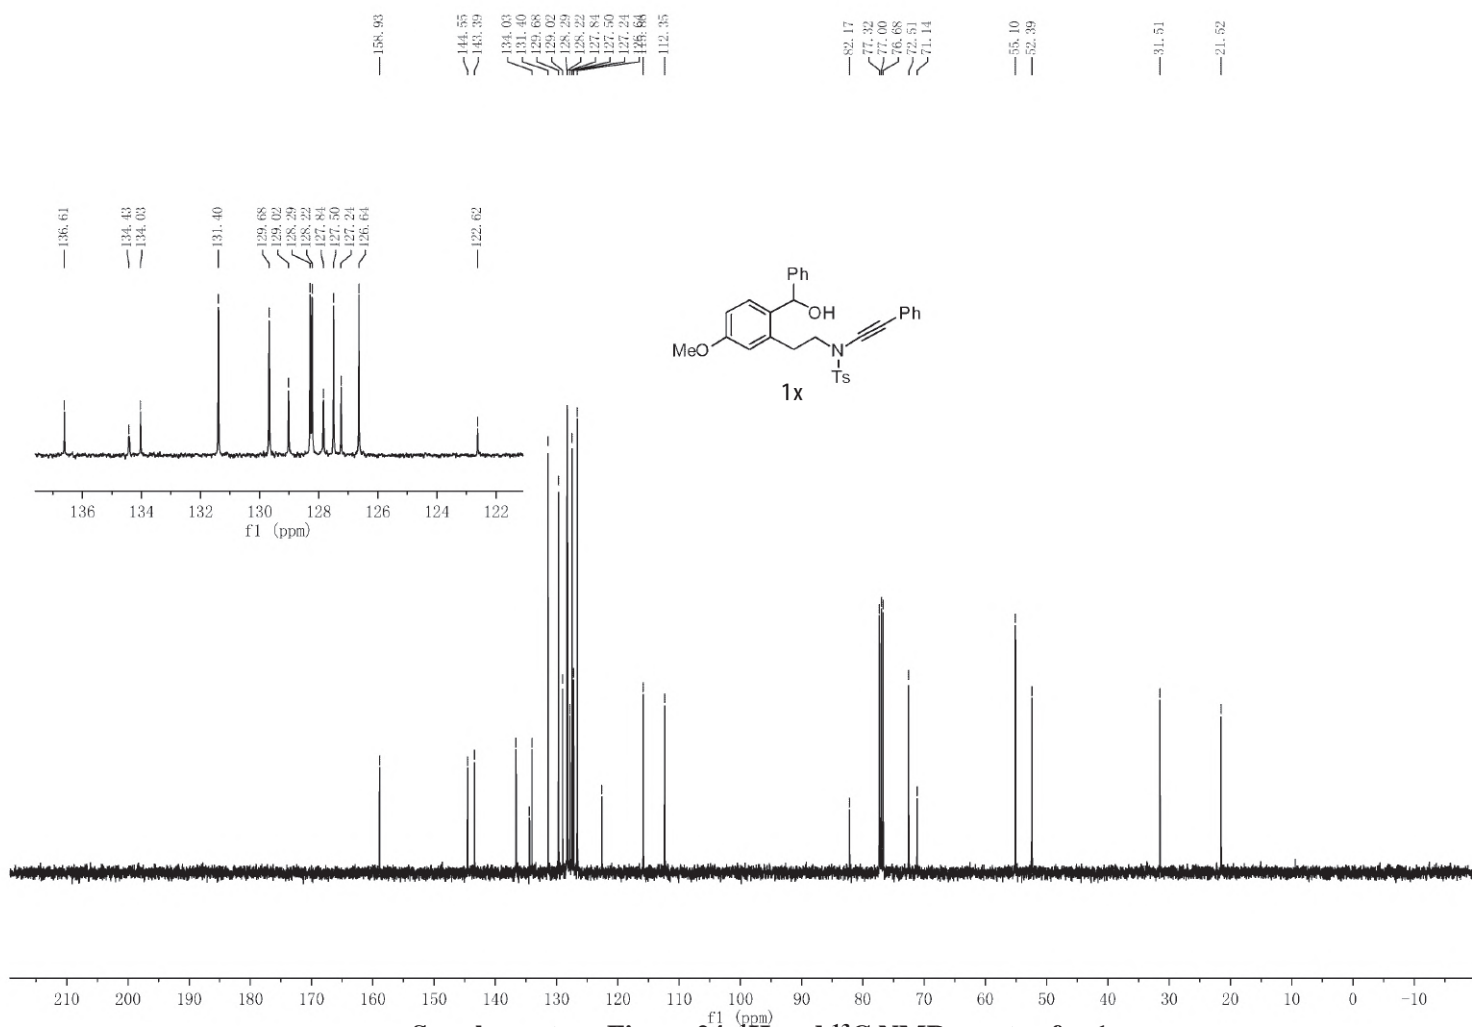

Supplementary Figure 24. <sup>1</sup>H and <sup>13</sup>C NMR spectra for 1x

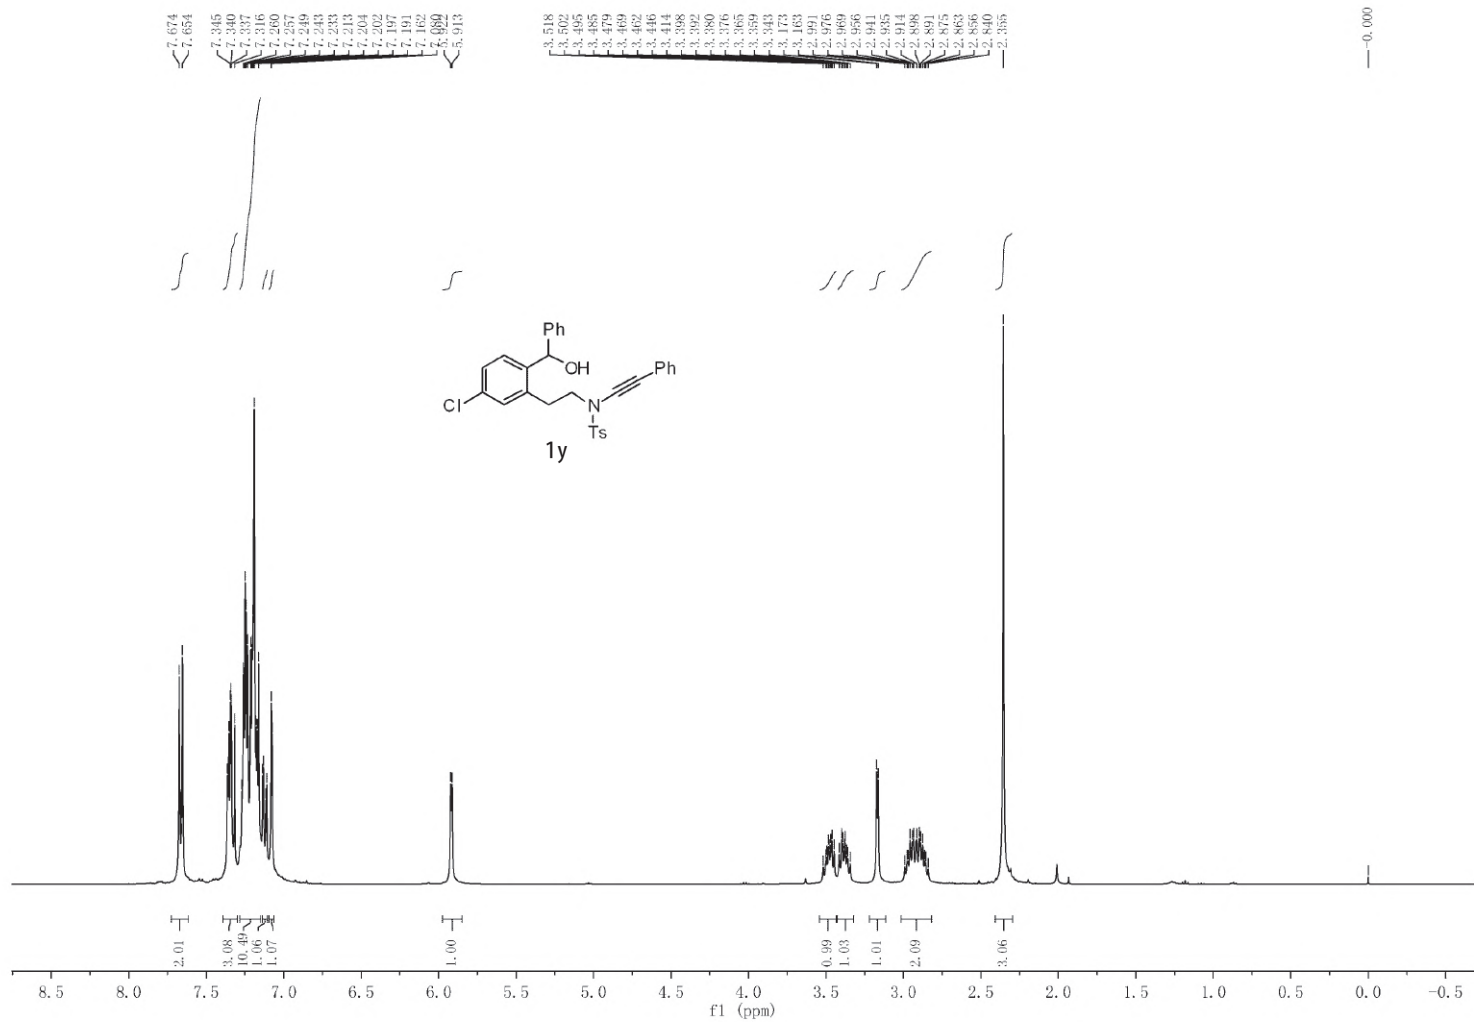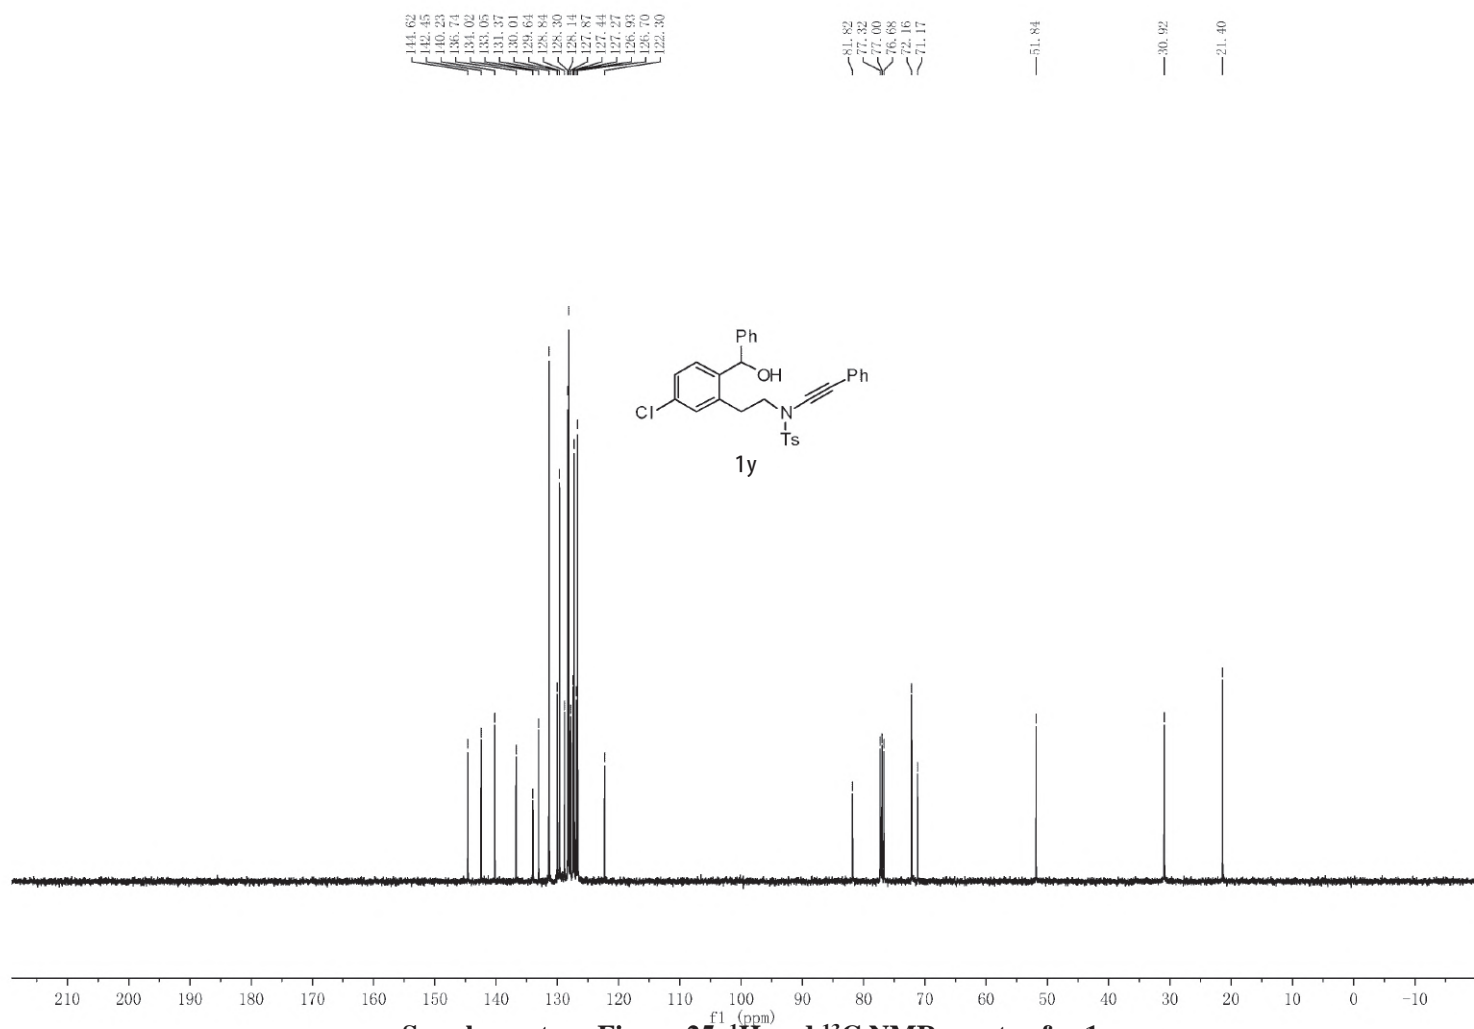

Supplementary Figure 25. <sup>1</sup>H and <sup>13</sup>C NMR spectra for **1y**

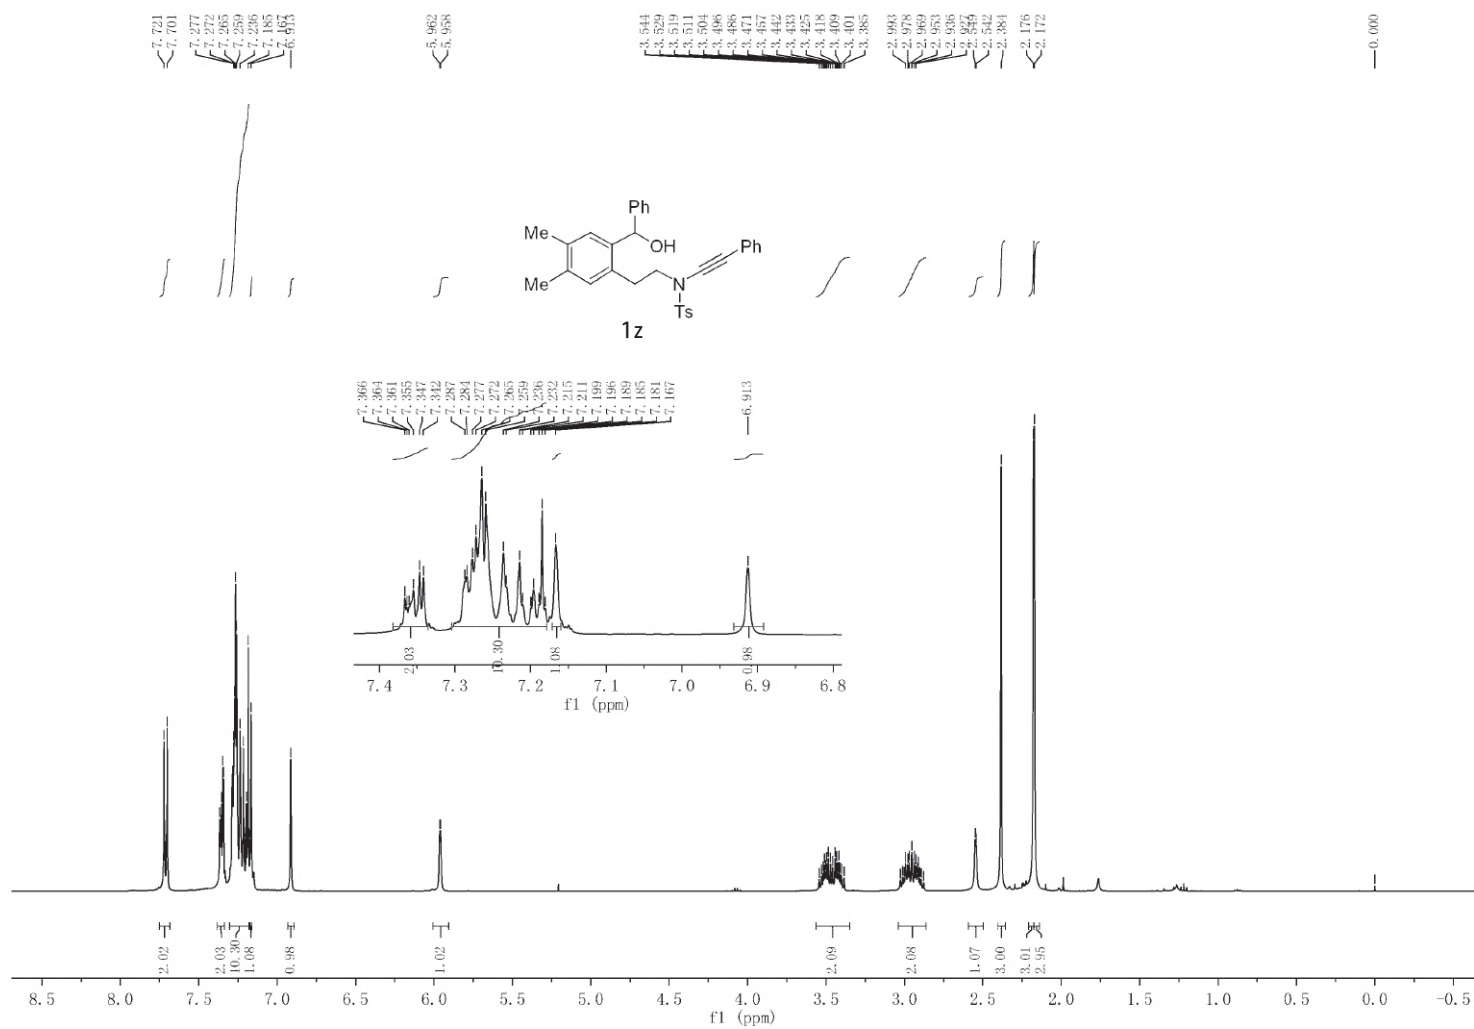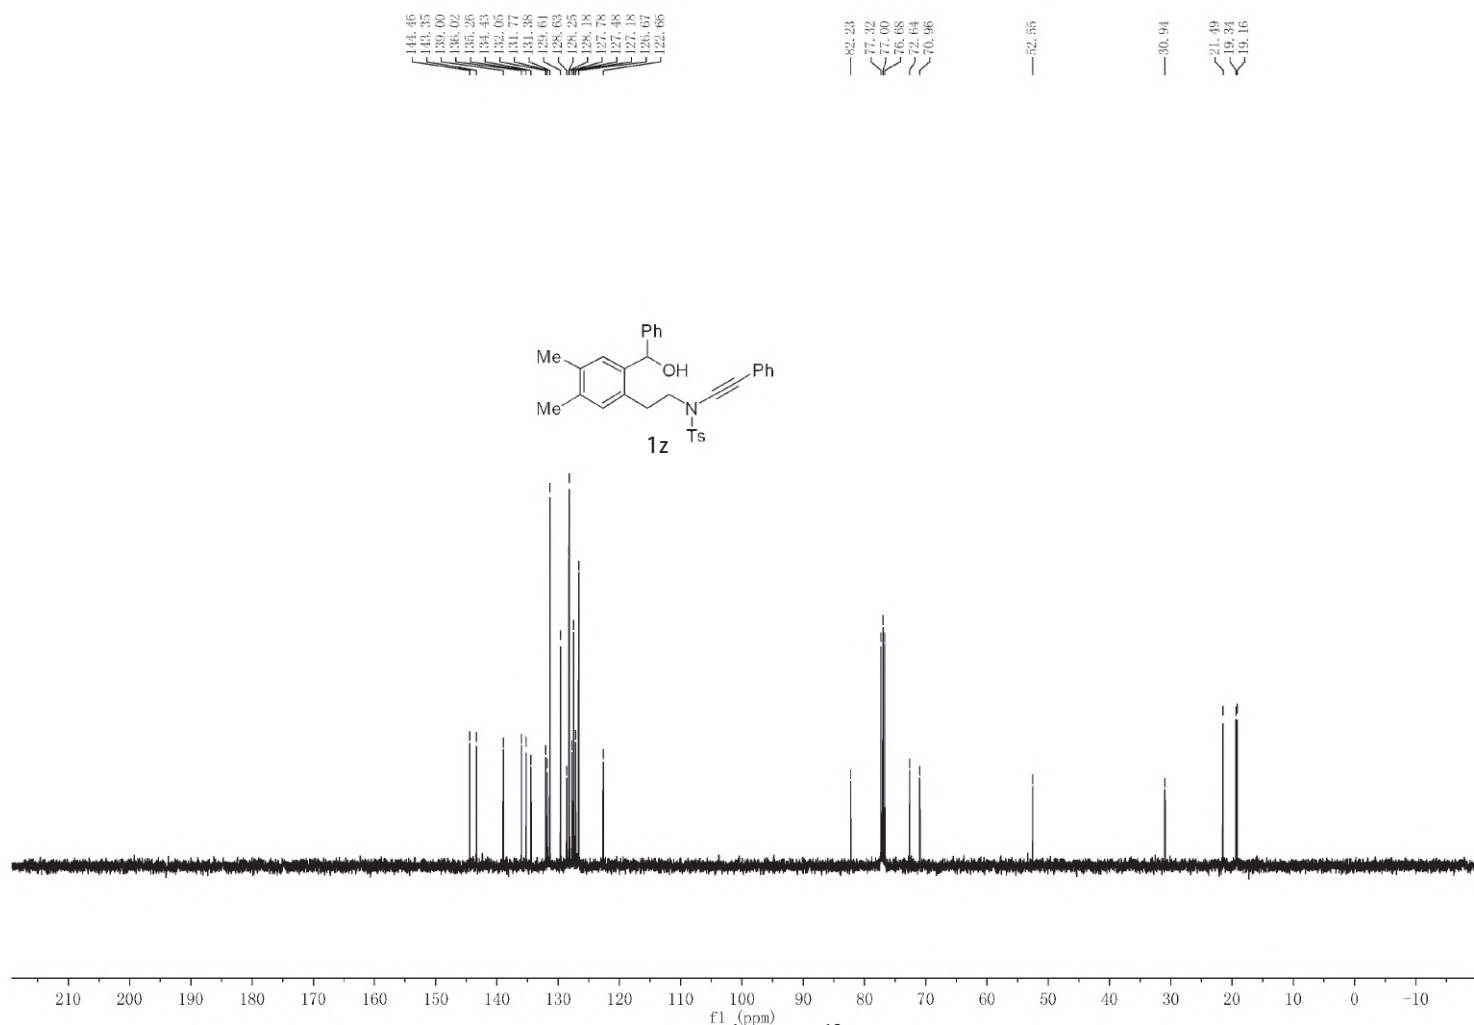

Supplementary Figure 26. <sup>1</sup>H and <sup>13</sup>C NMR spectra for 1z

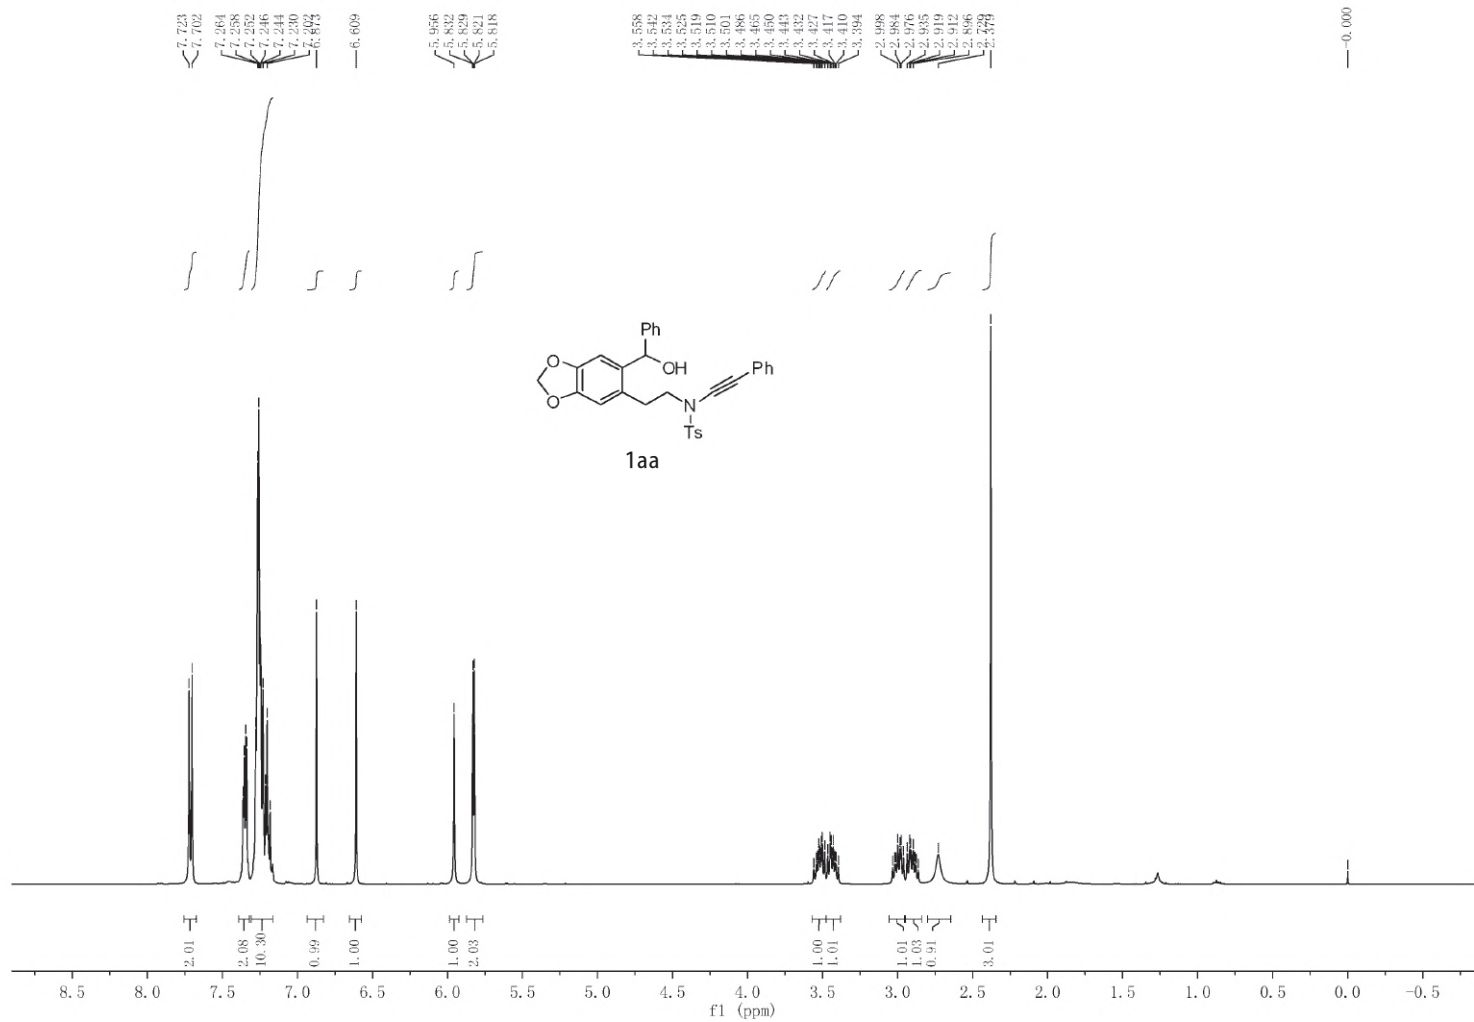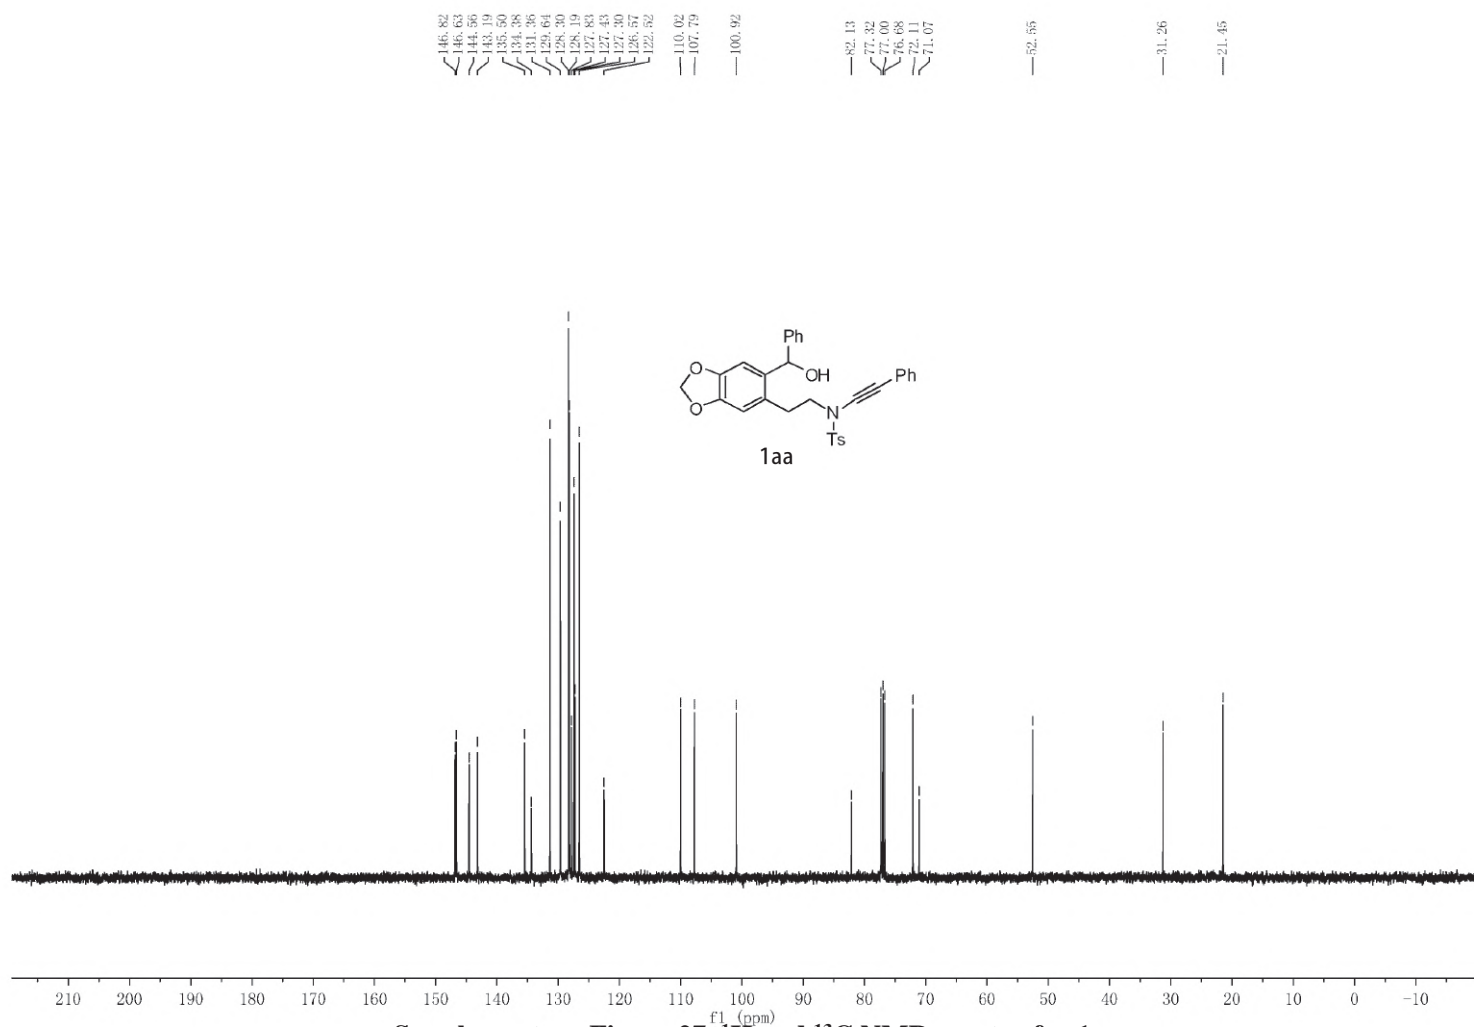

Supplementary Figure 27. <sup>1</sup>H and <sup>13</sup>C NMR spectra for 1aa

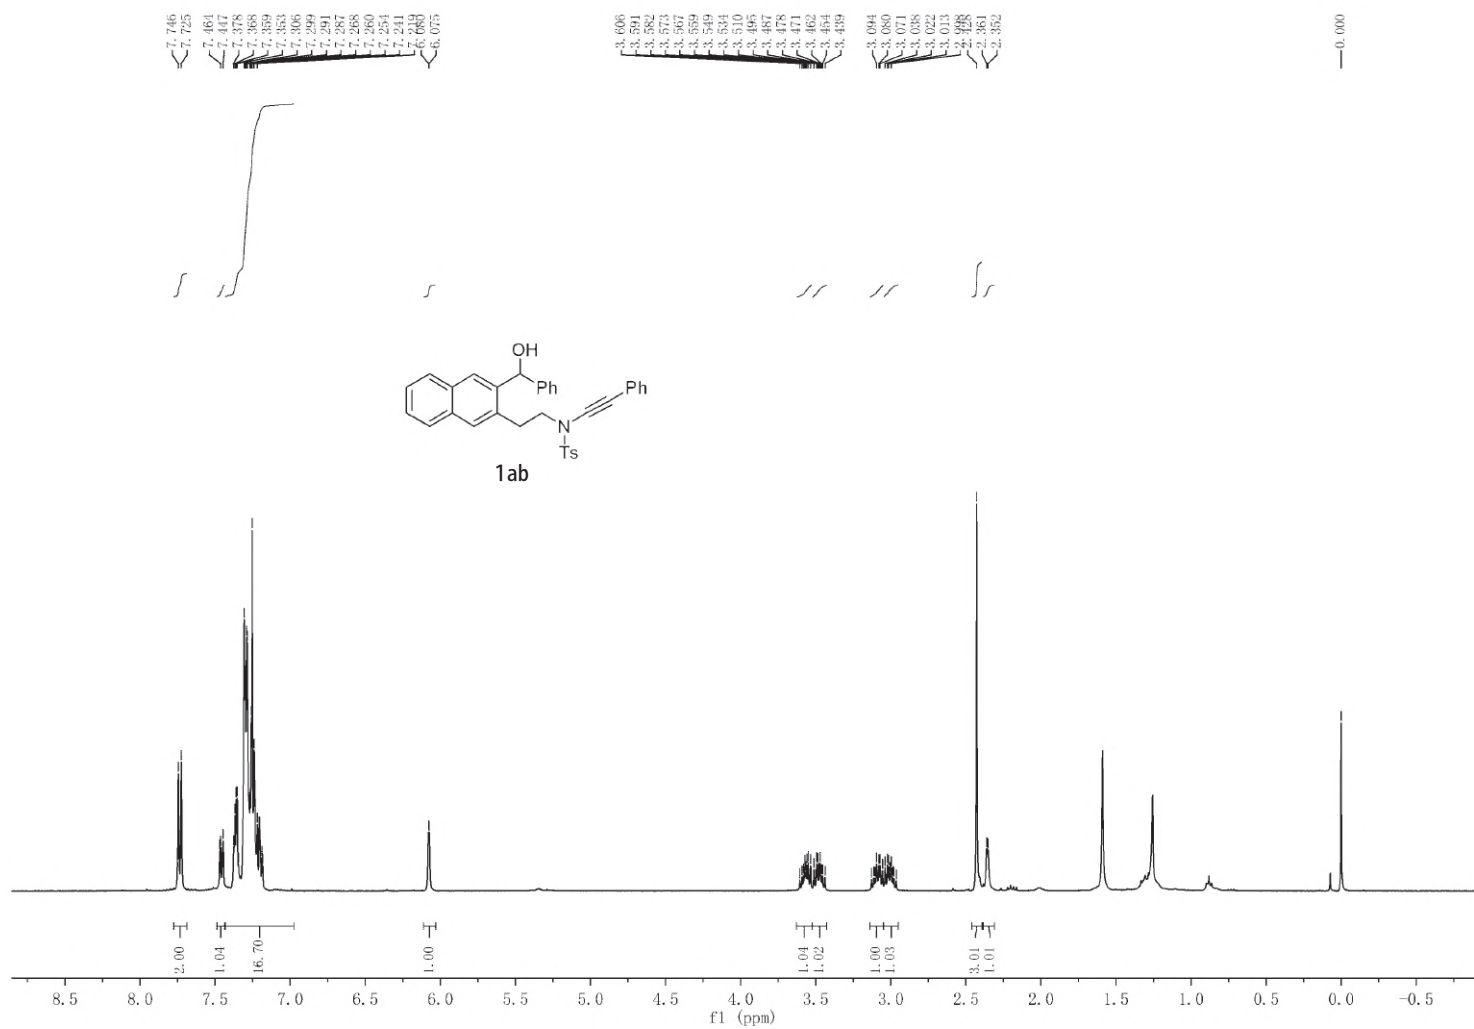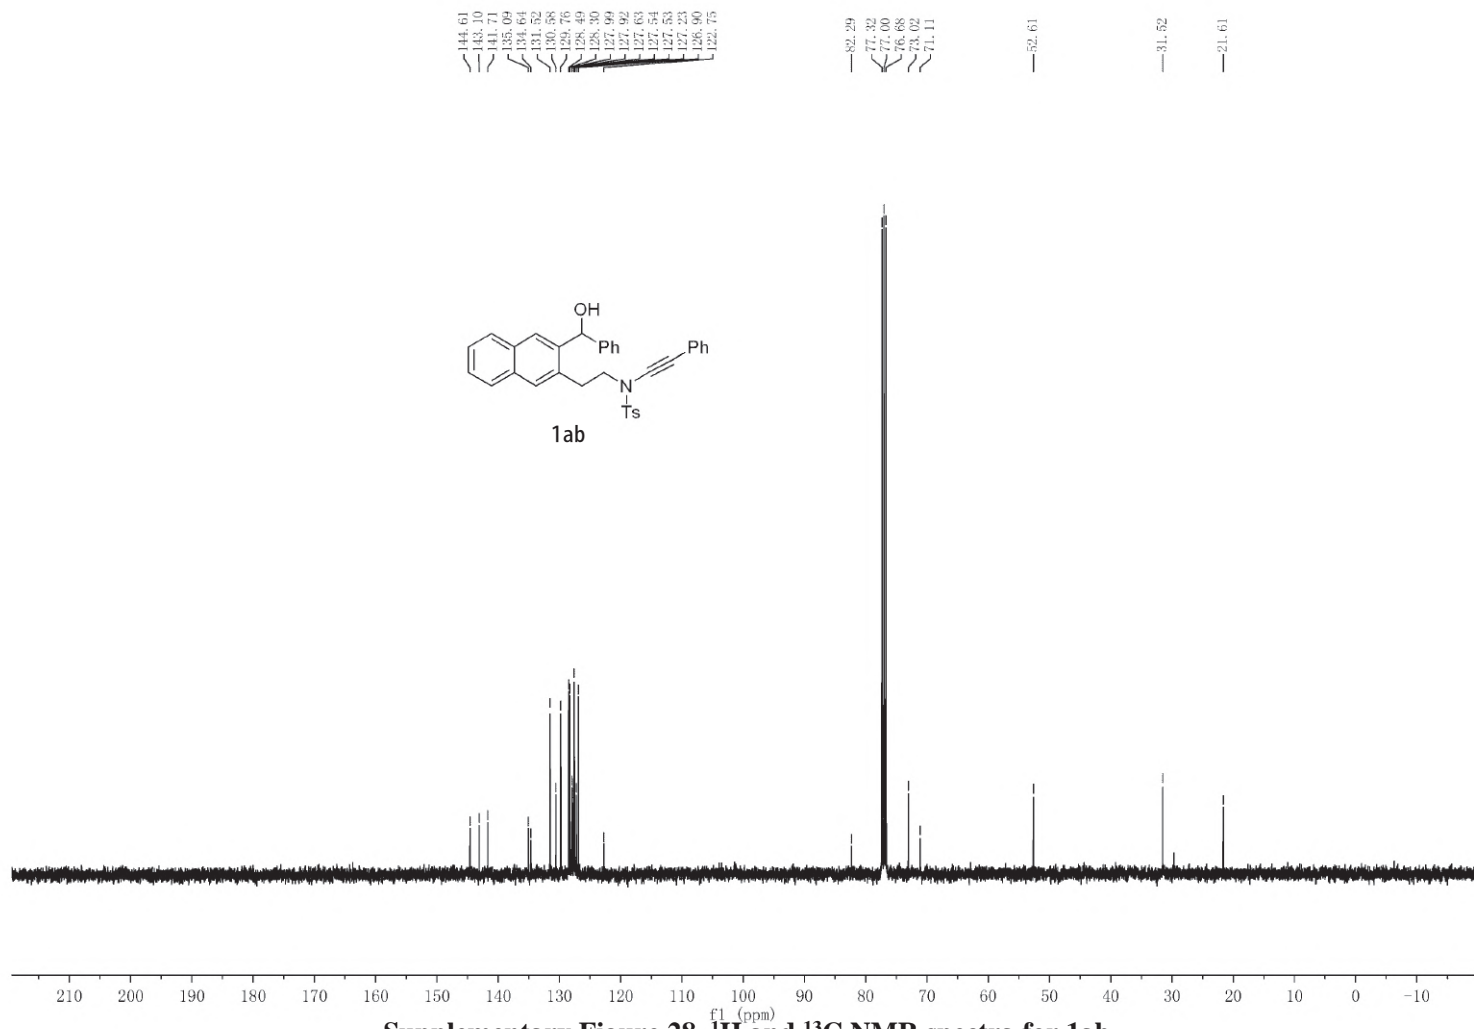

Supplementary Figure 28. <sup>1</sup>H and <sup>13</sup>C NMR spectra for 1ab

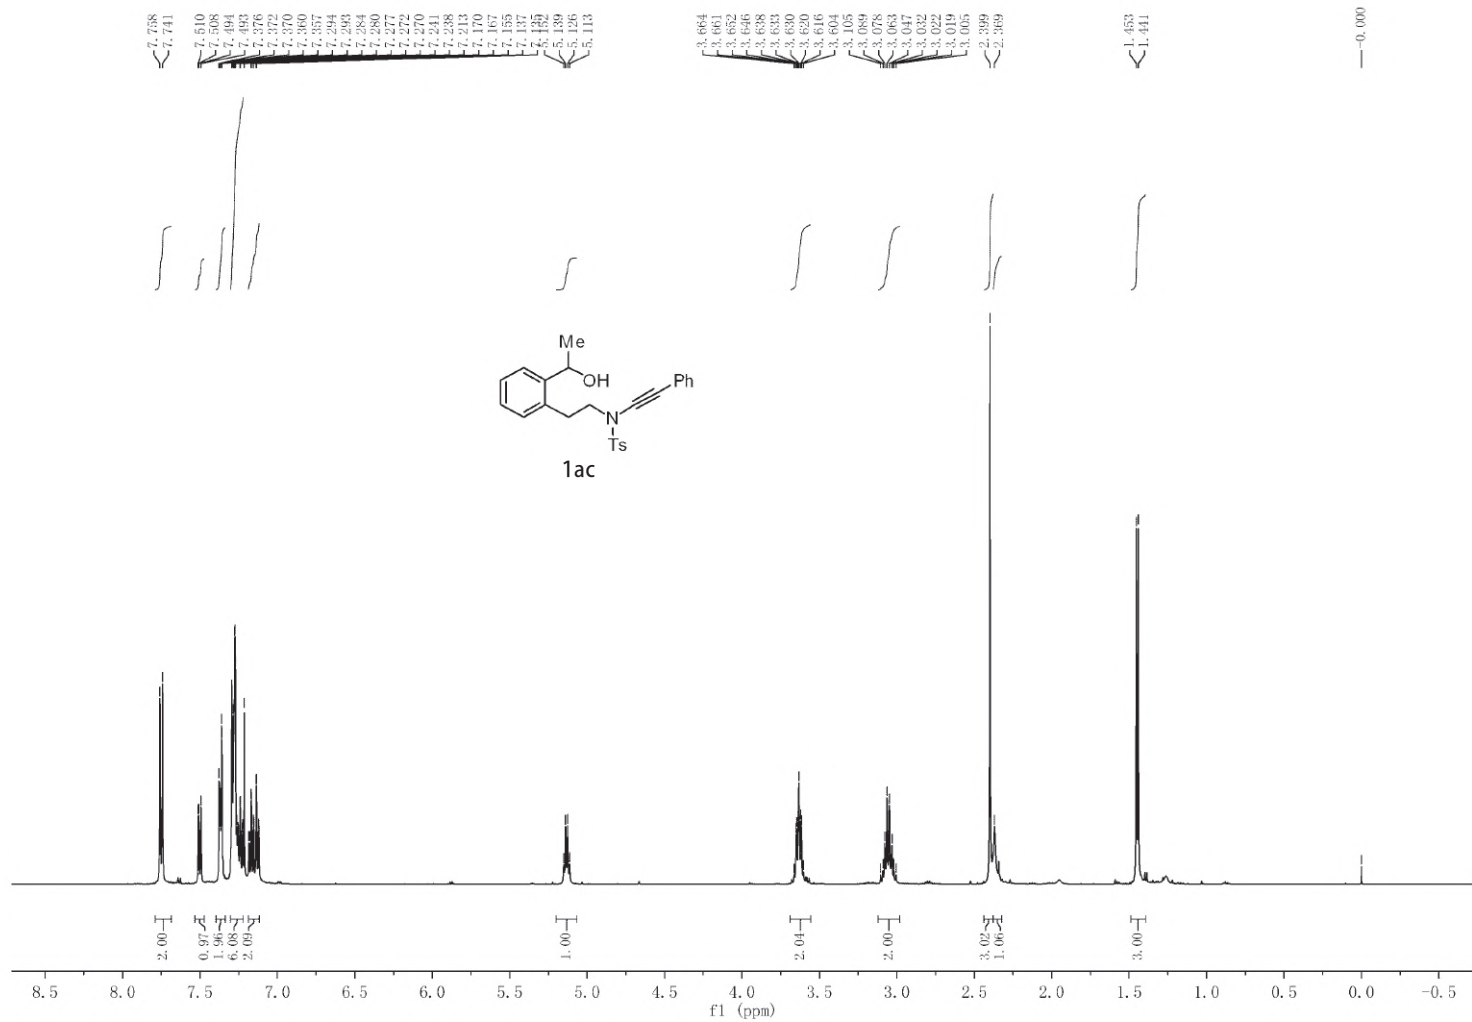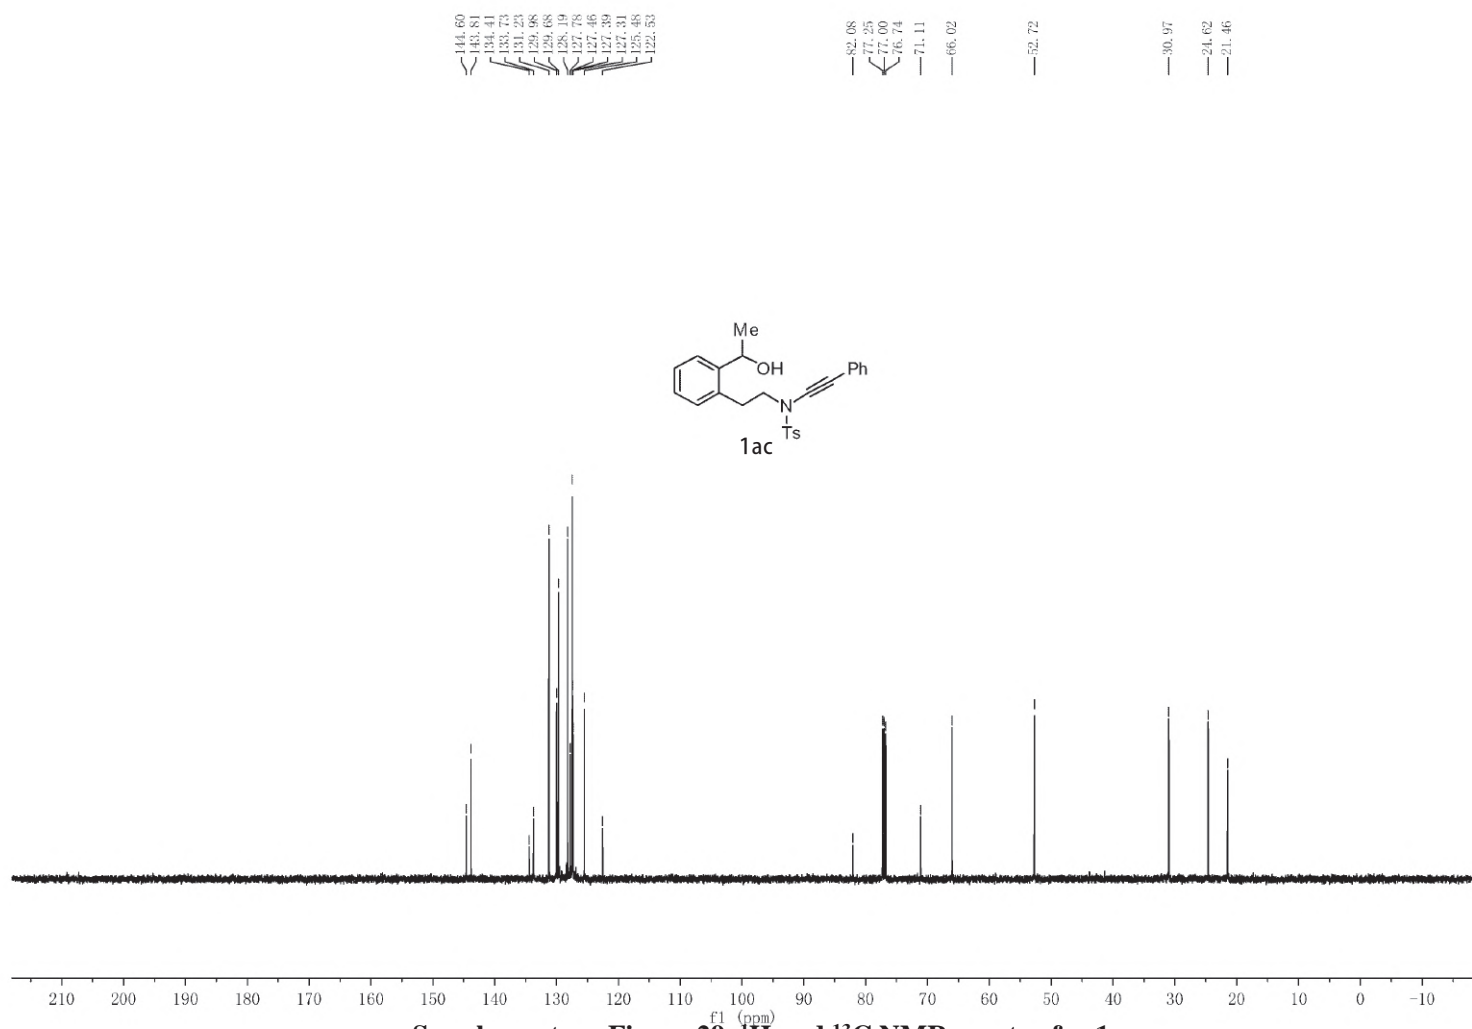

Supplementary Figure 29. <sup>1</sup>H and <sup>13</sup>C NMR spectra for 1ac

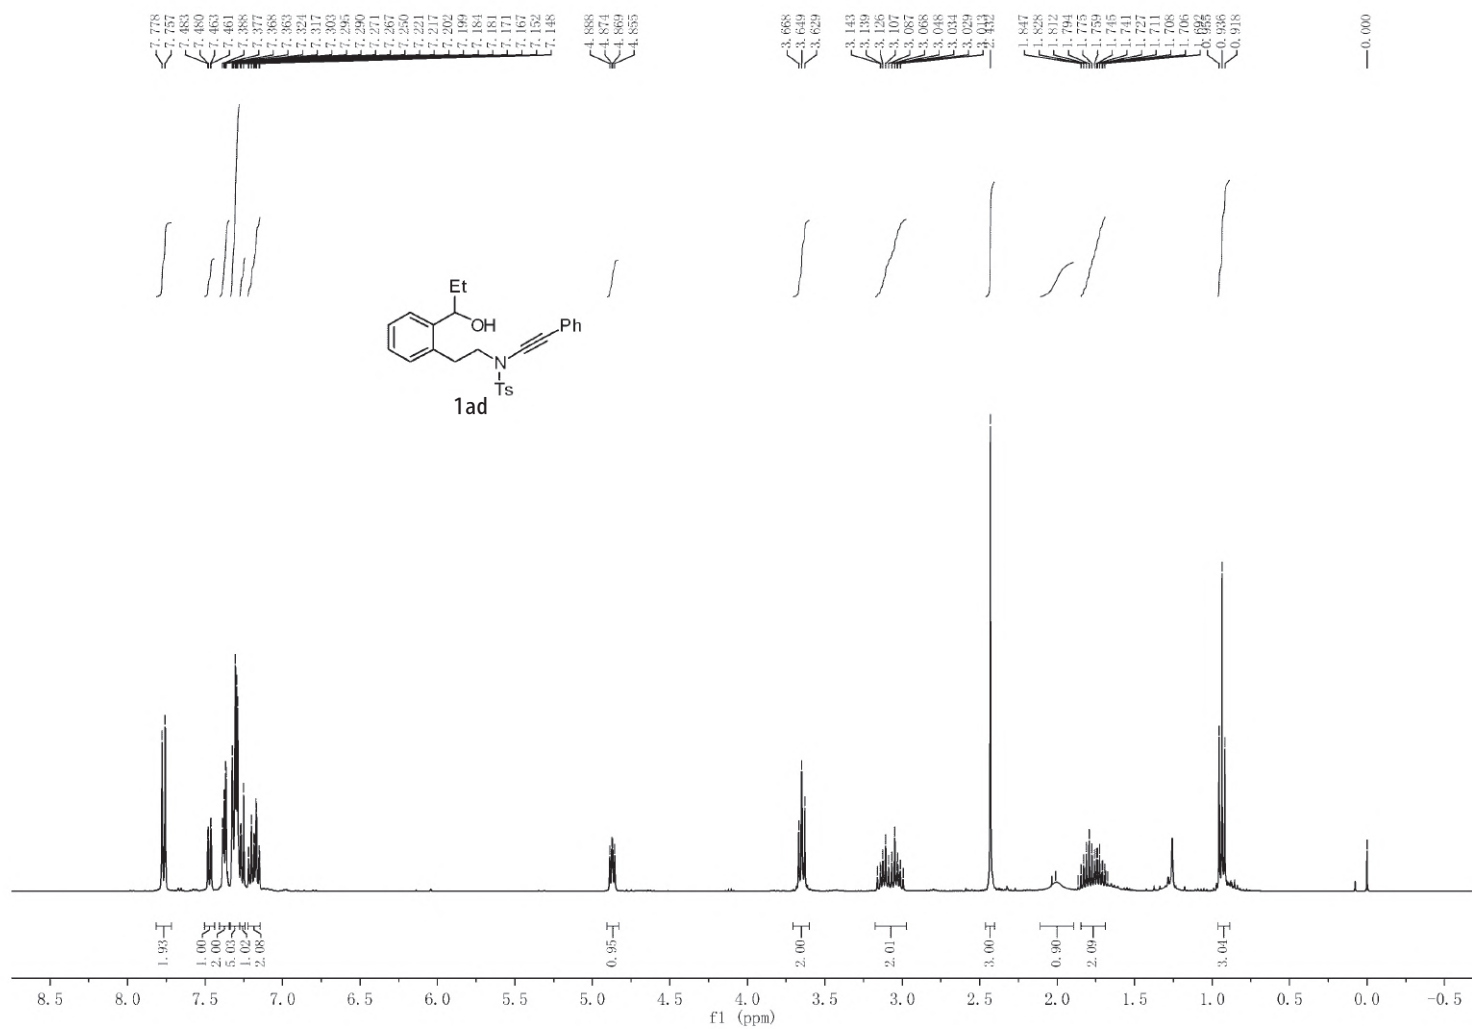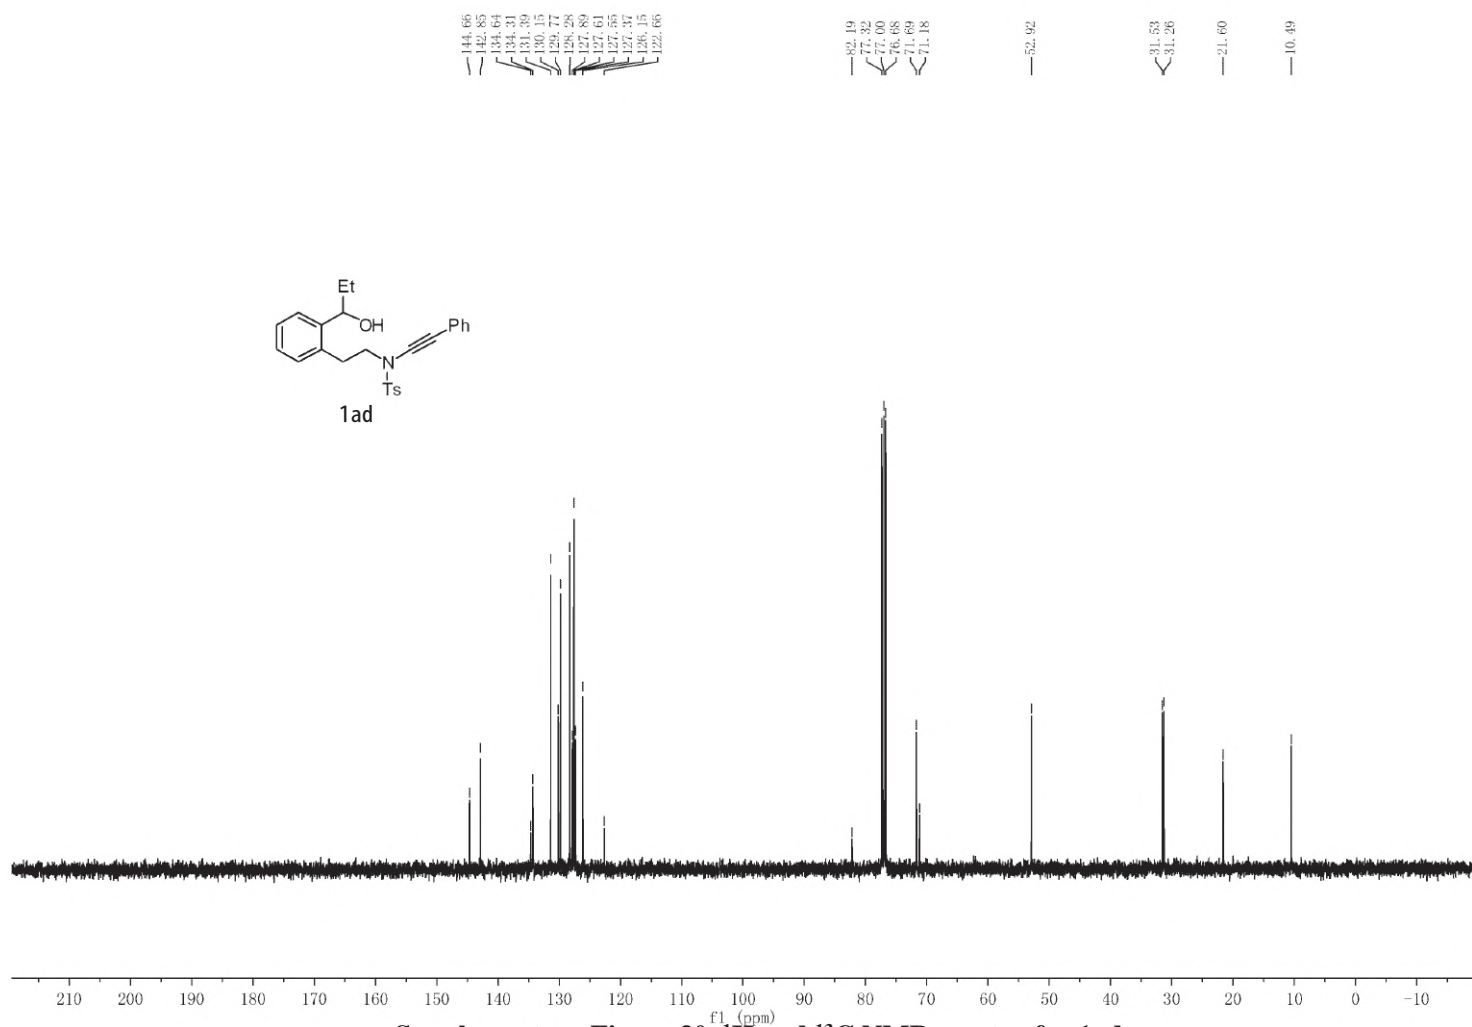

Supplementary Figure 30. <sup>1</sup>H and <sup>13</sup>C NMR spectra for **1ad**

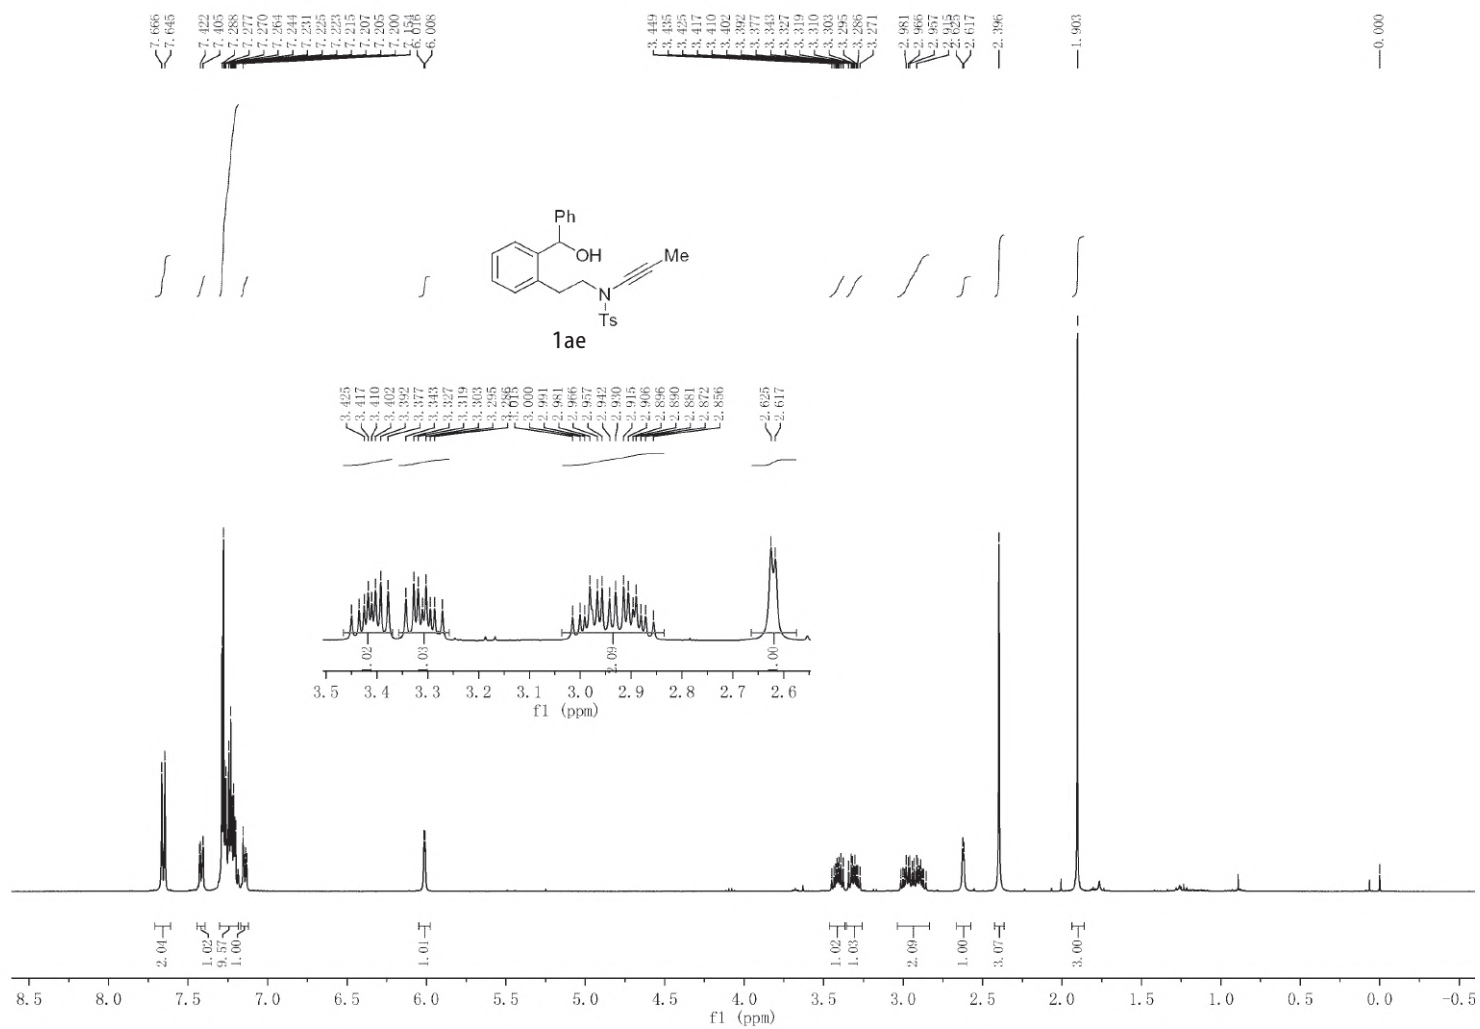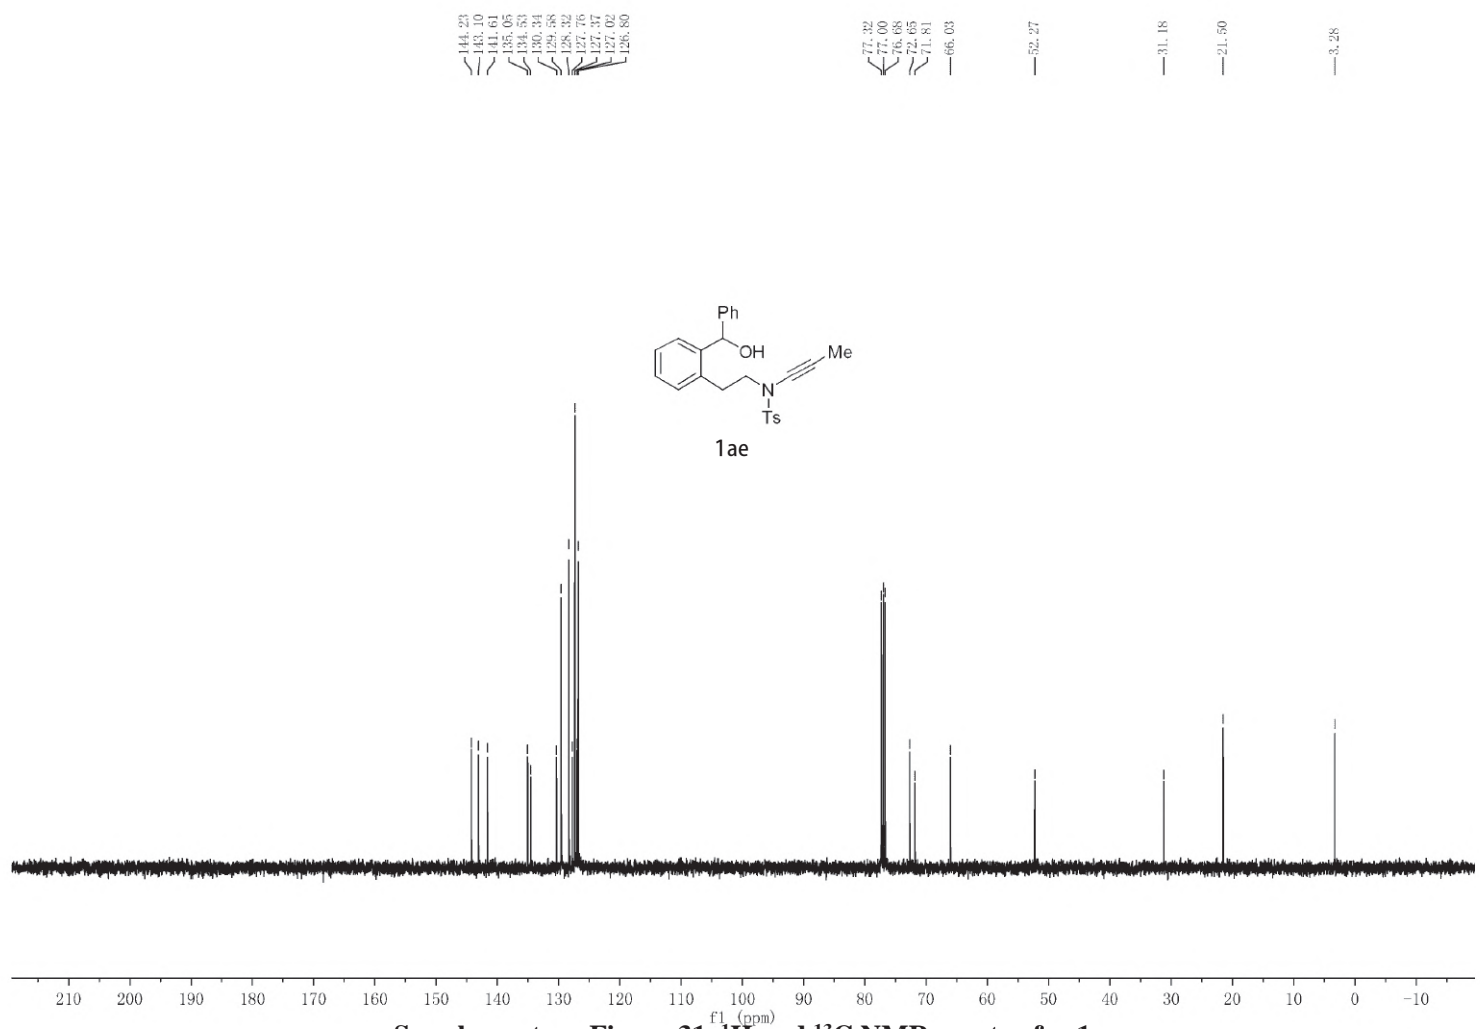

Supplementary Figure 31. <sup>1</sup>H and <sup>13</sup>C NMR spectra for 1ae



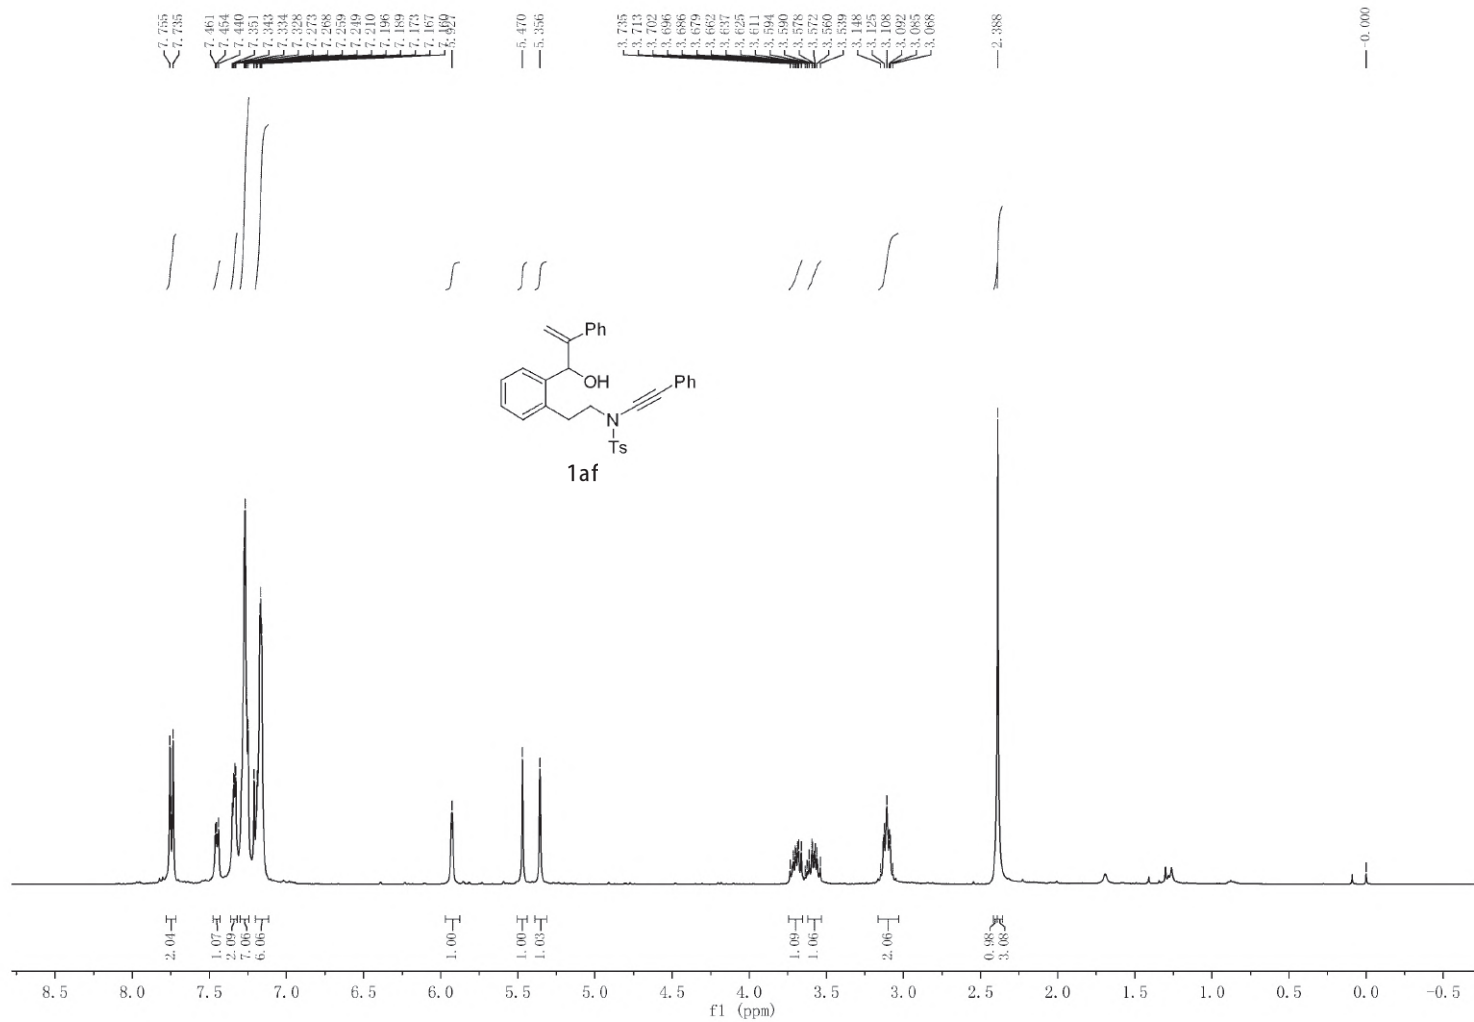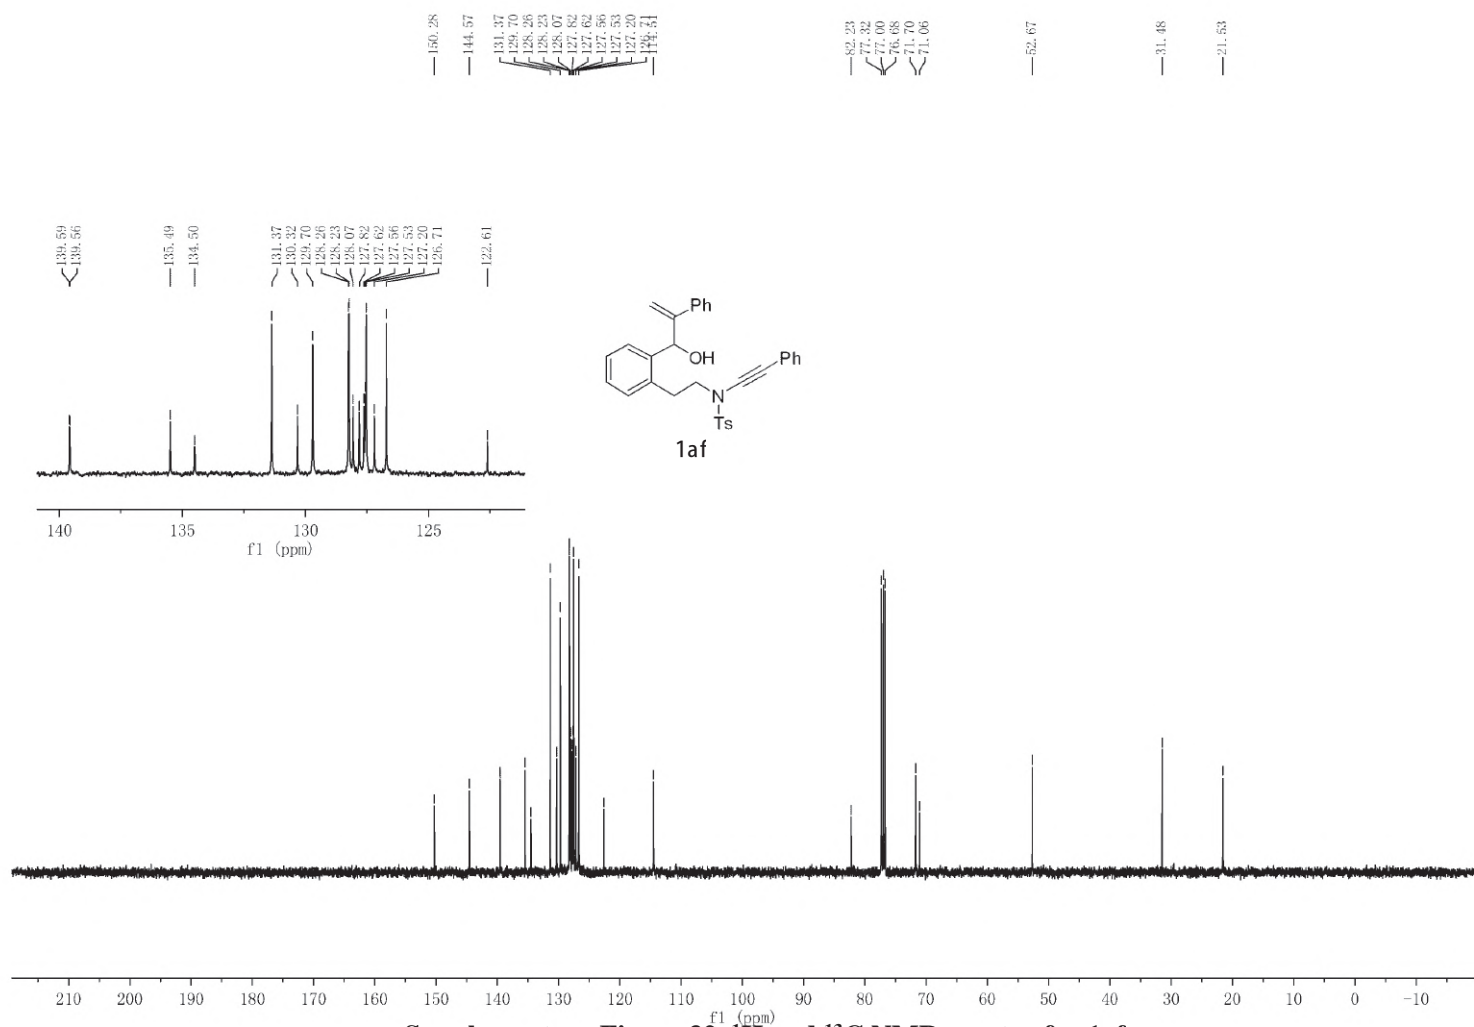

Supplementary Figure 32. <sup>1</sup>H and <sup>13</sup>C NMR spectra for 1af

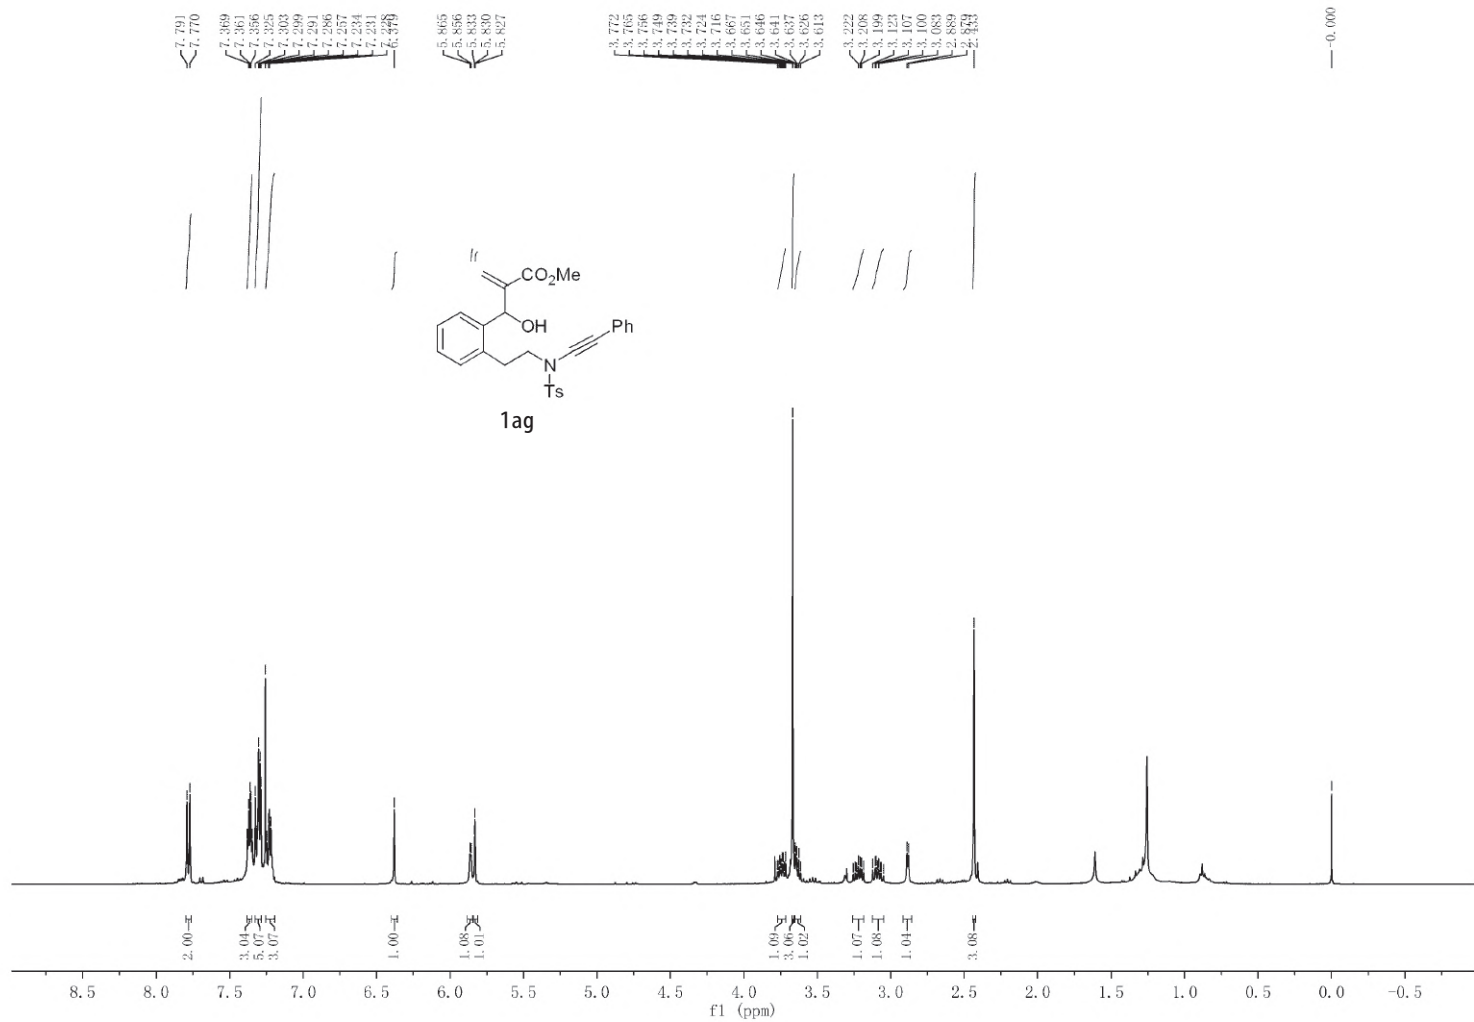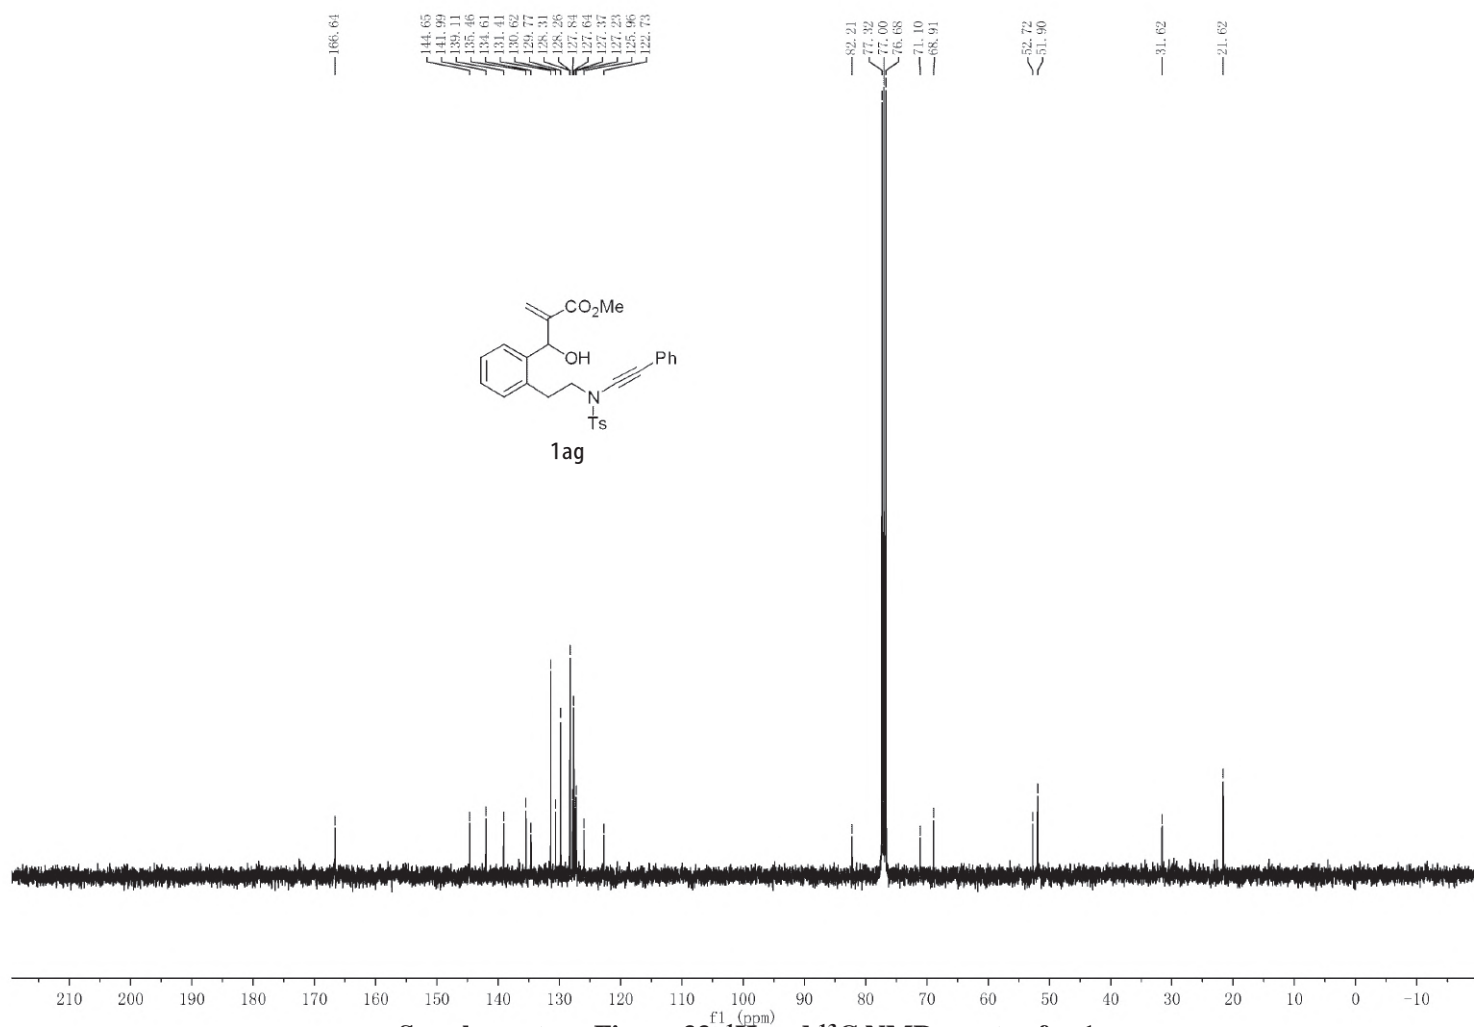

Supplementary Figure 33. <sup>1</sup>H and <sup>13</sup>C NMR spectra for **1ag**

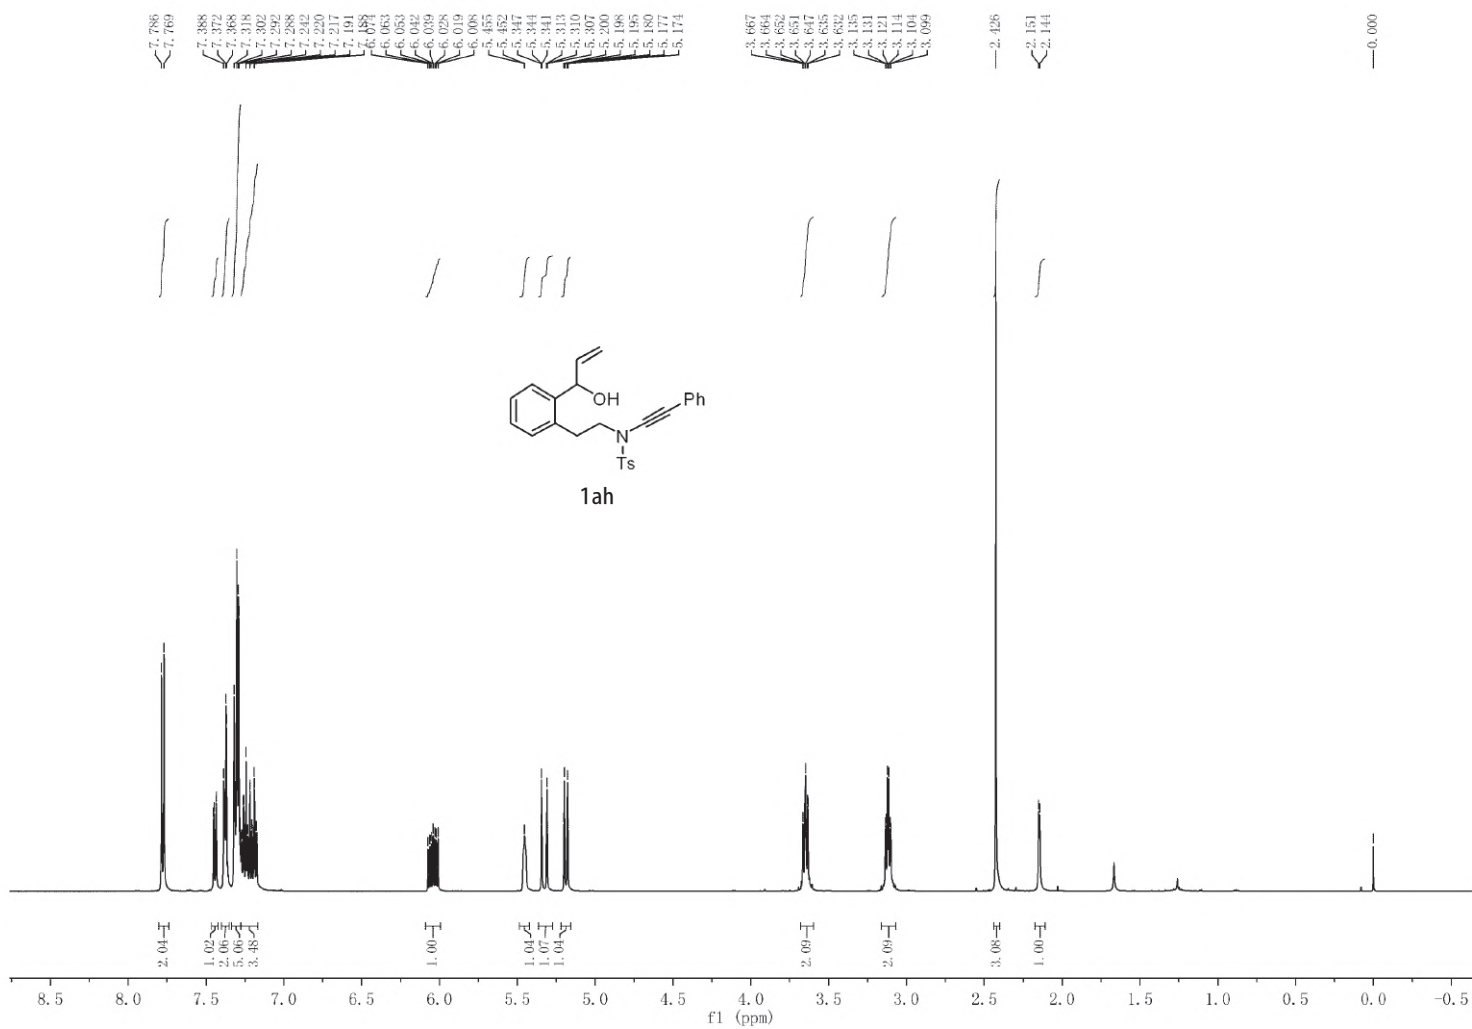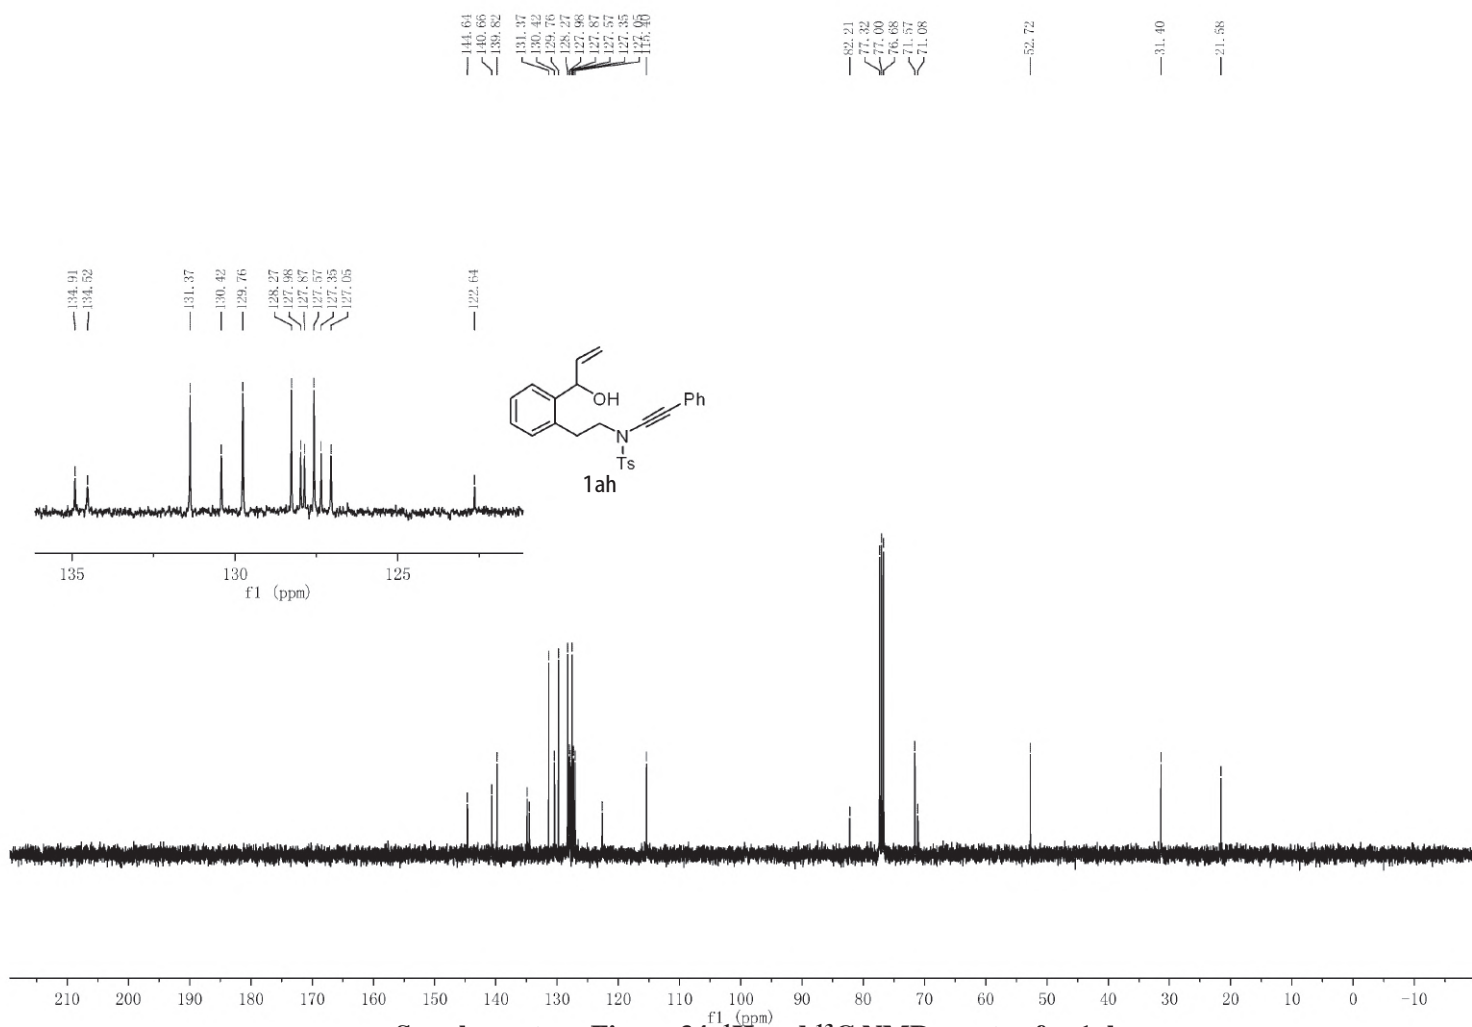

Supplementary Figure 34. <sup>1</sup>H and <sup>13</sup>C NMR spectra for 1ah

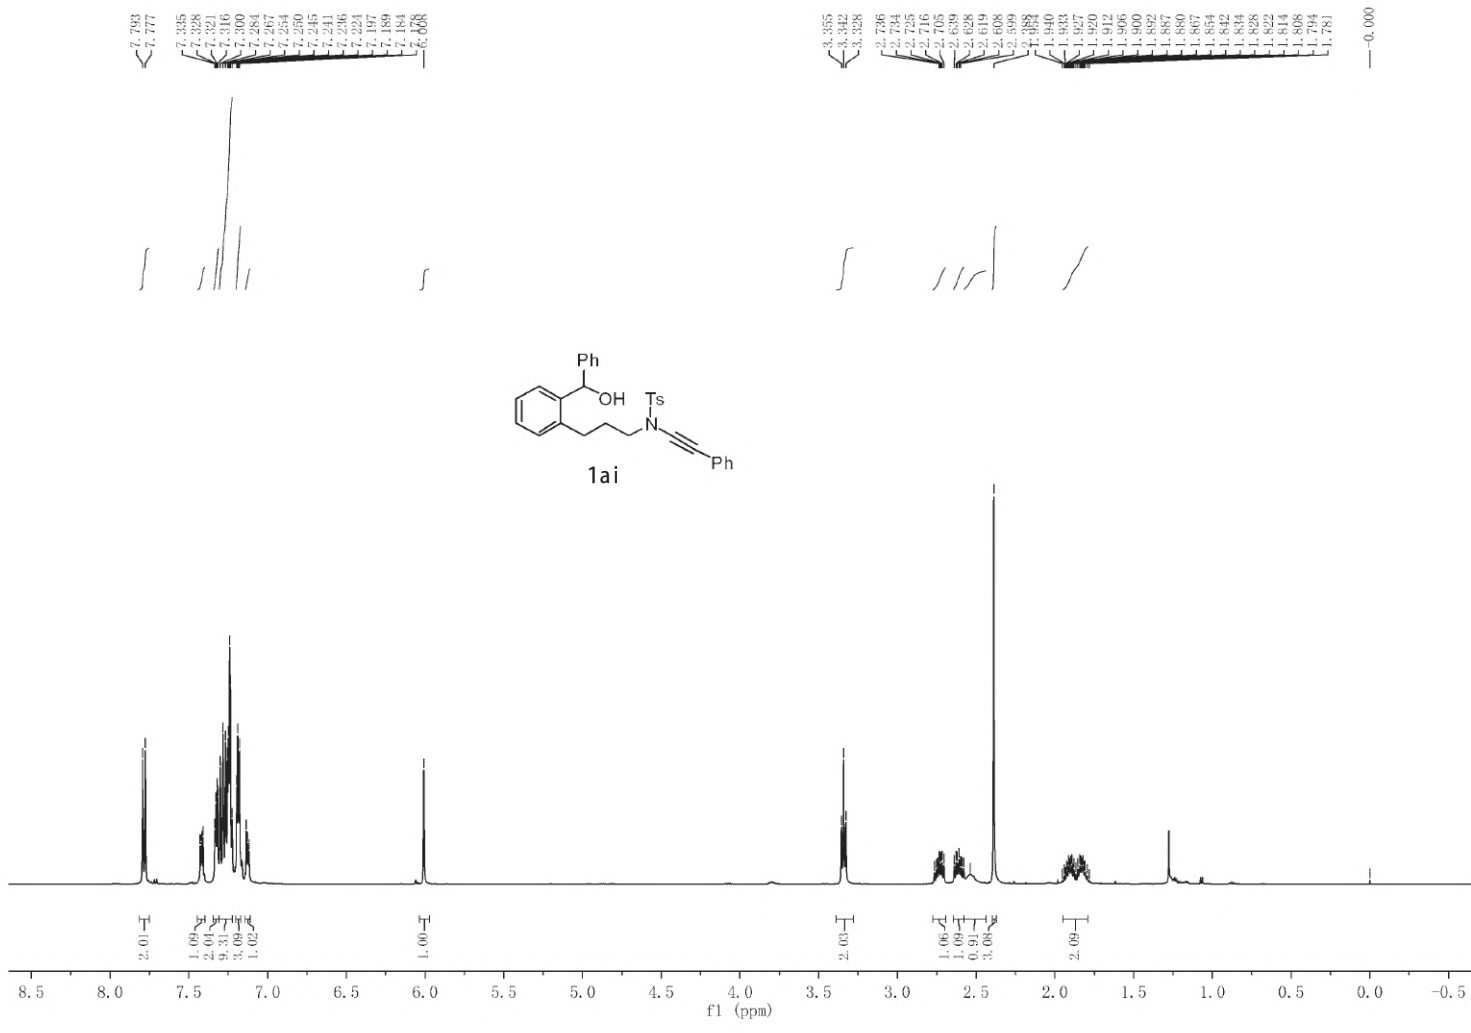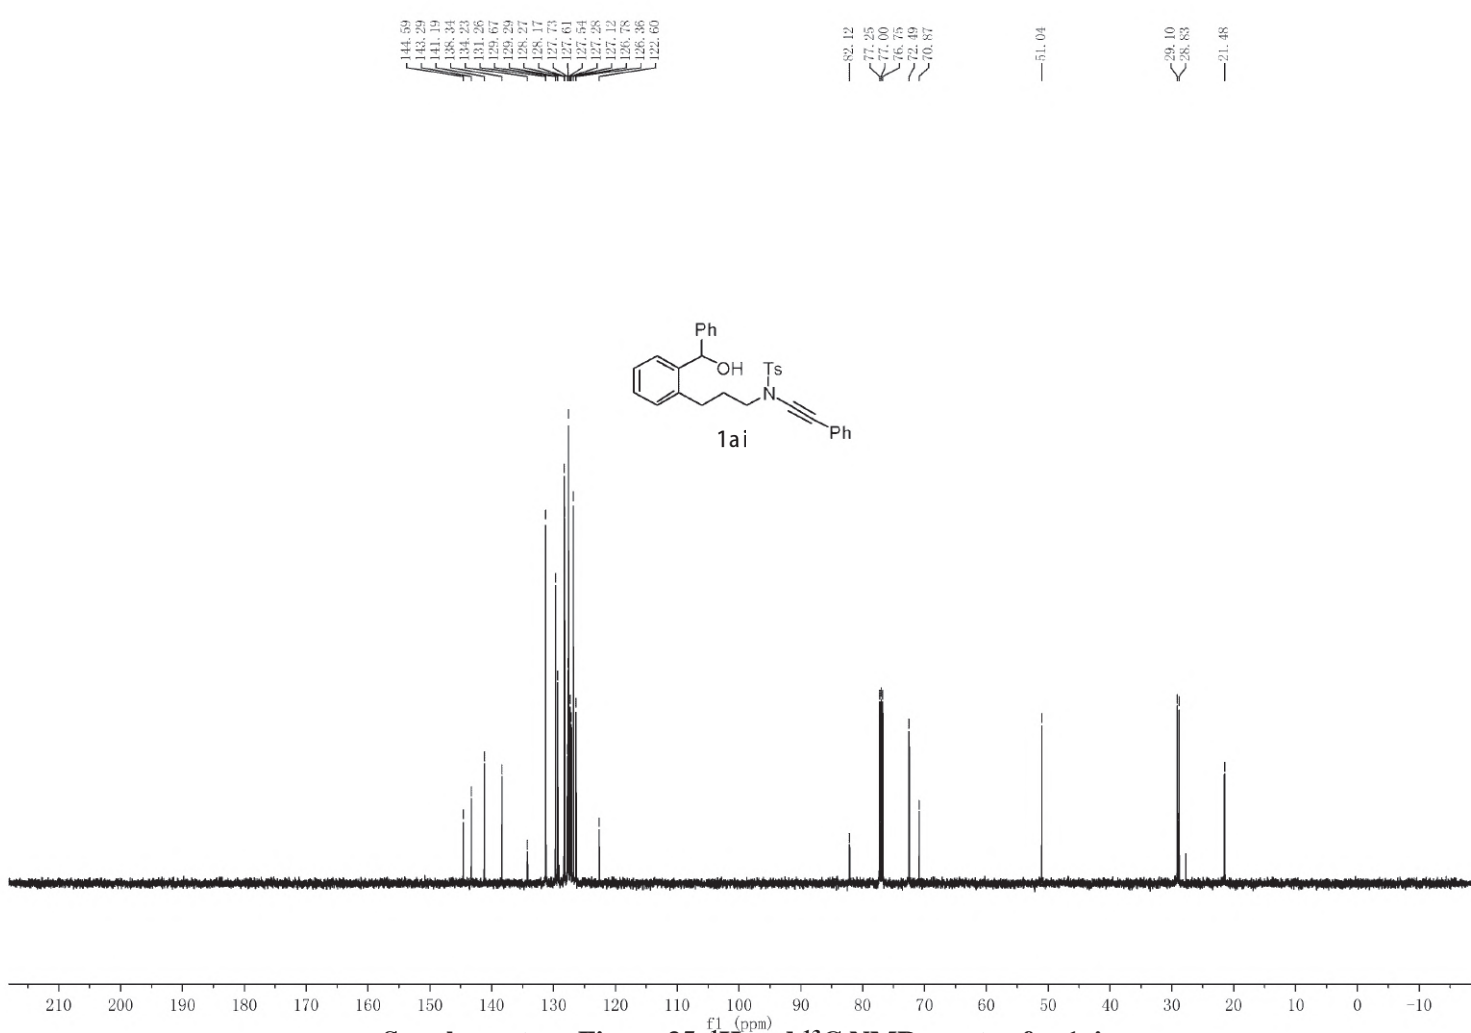

Supplementary Figure 35. <sup>1</sup>H and <sup>13</sup>C NMR spectra for 1ai

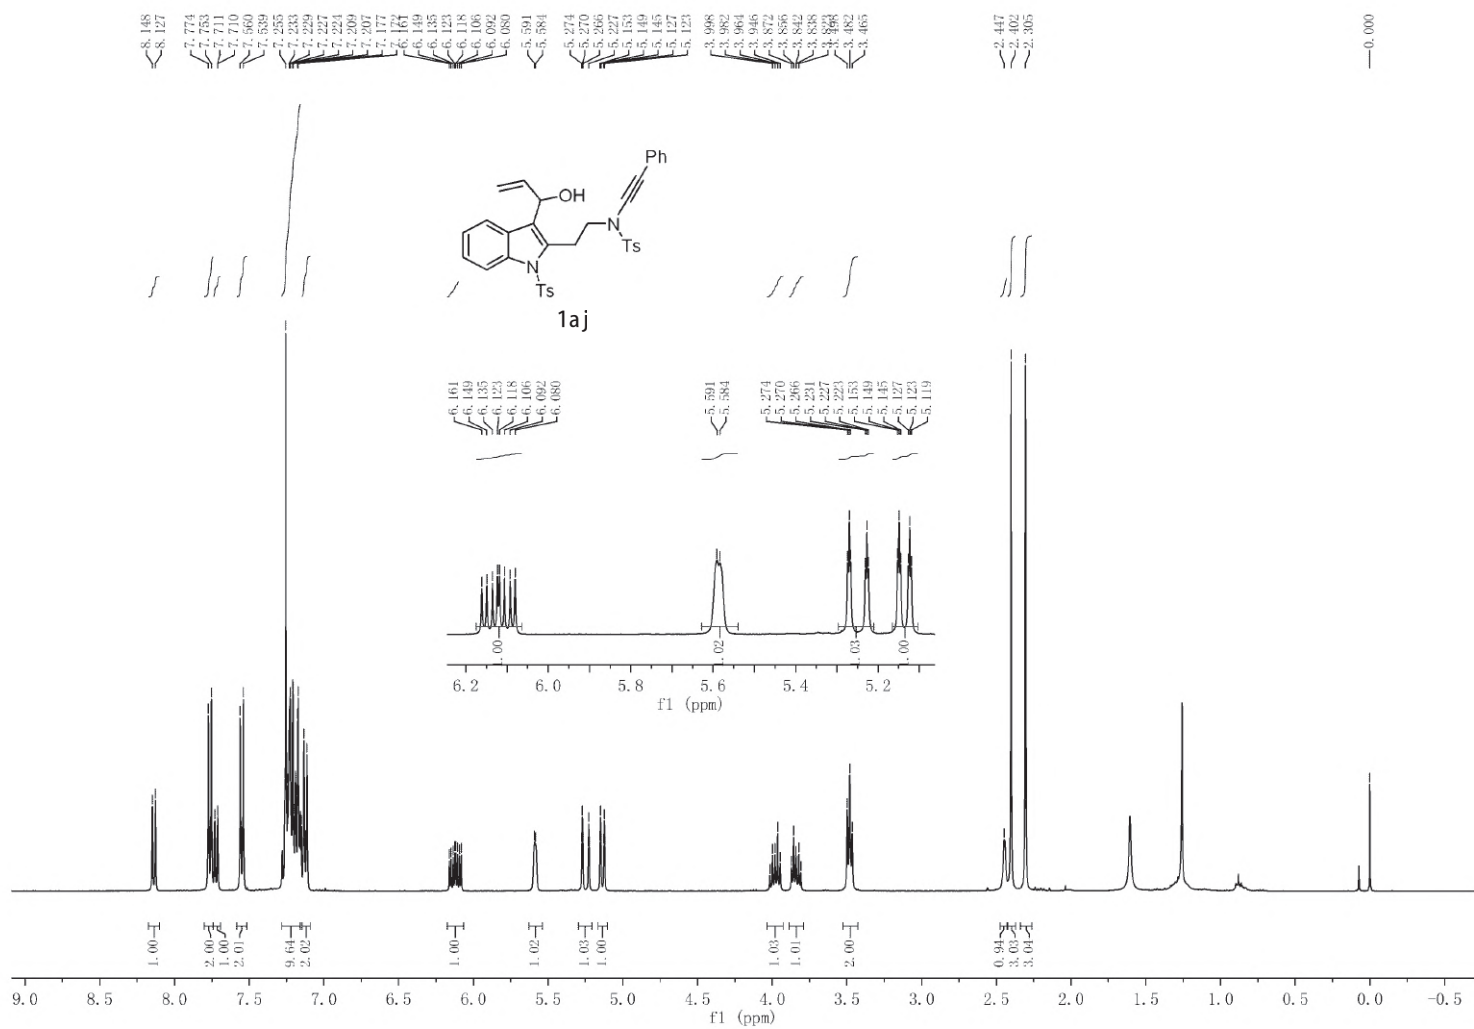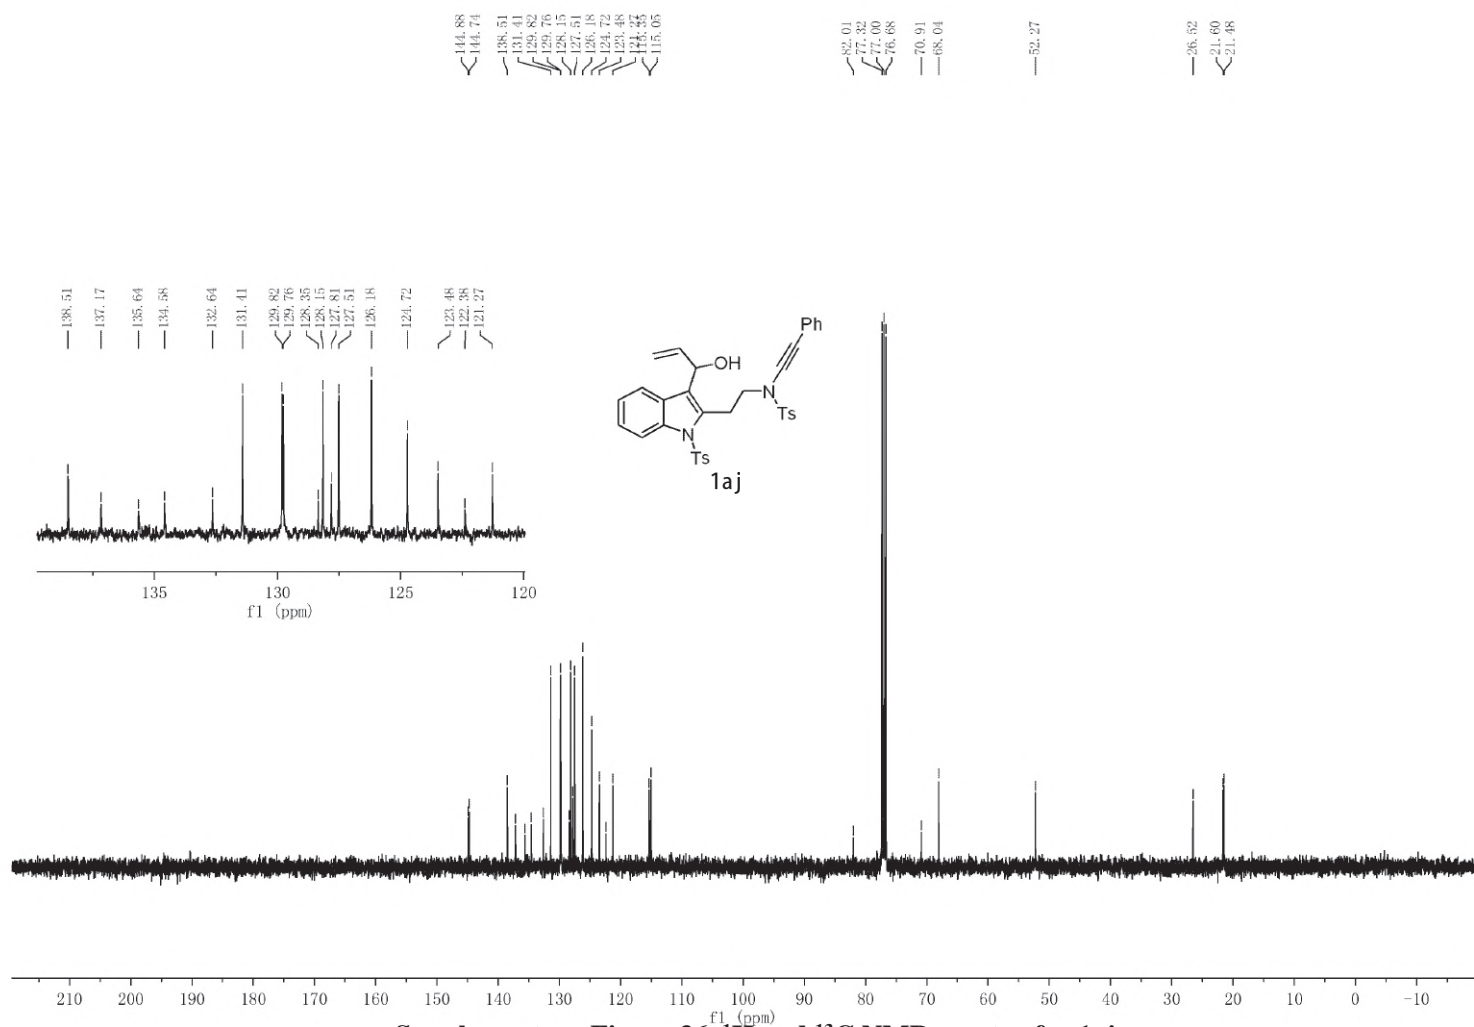

Supplementary Figure 36. <sup>1</sup>H and <sup>13</sup>C NMR spectra for 1aj

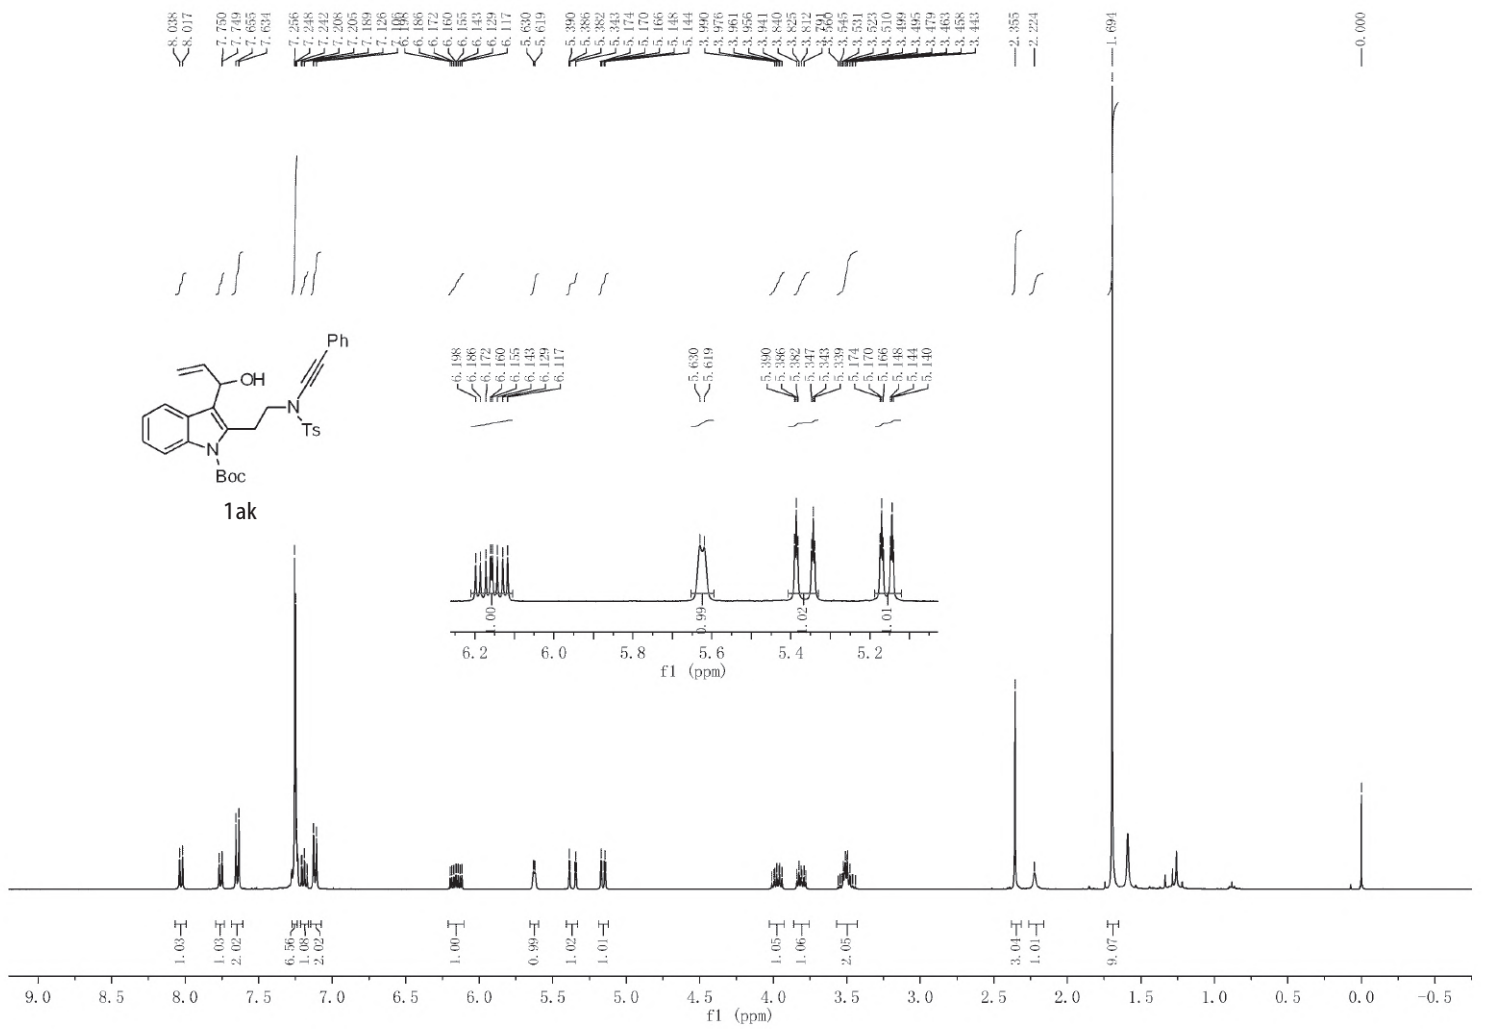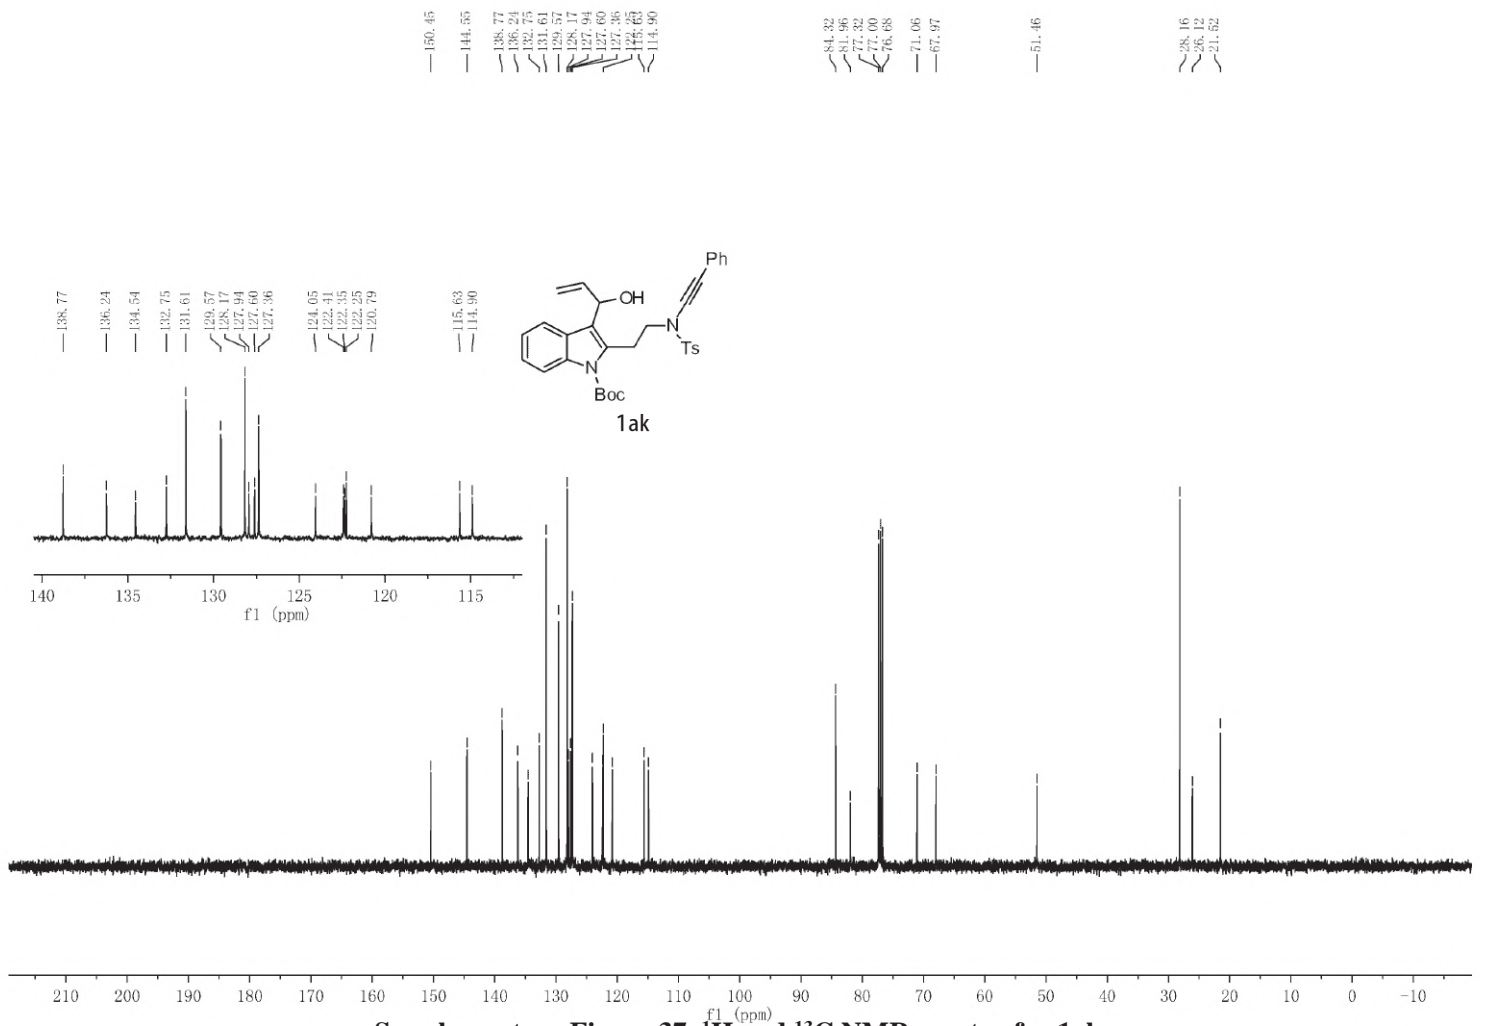

Supplementary Figure 37. <sup>1</sup>H and <sup>13</sup>C NMR spectra for 1ak

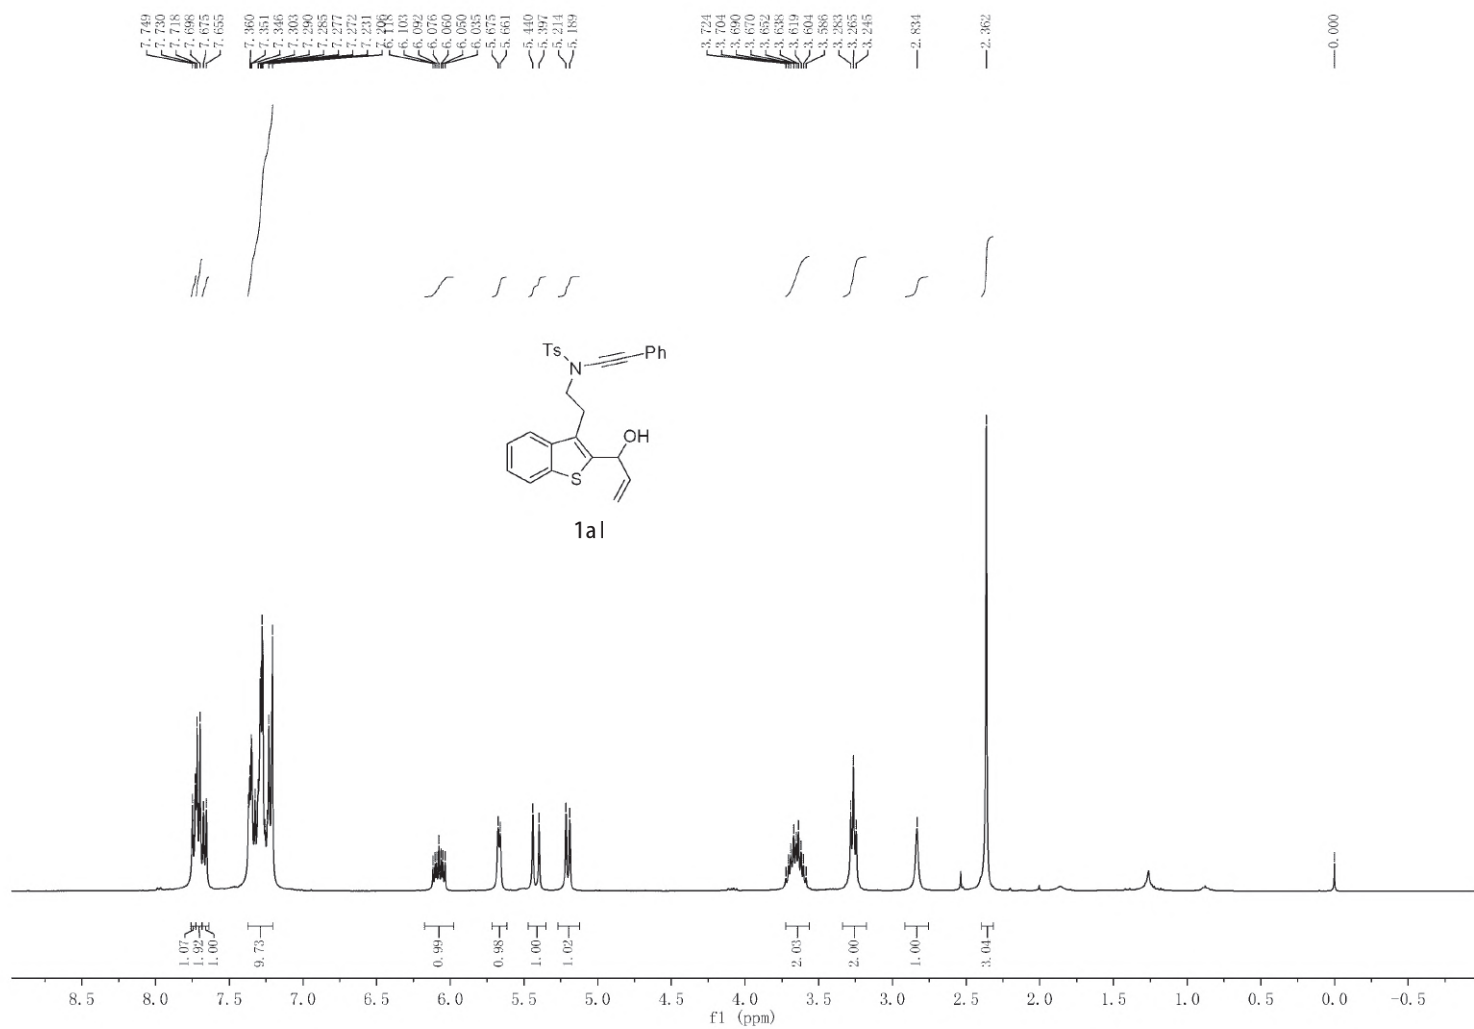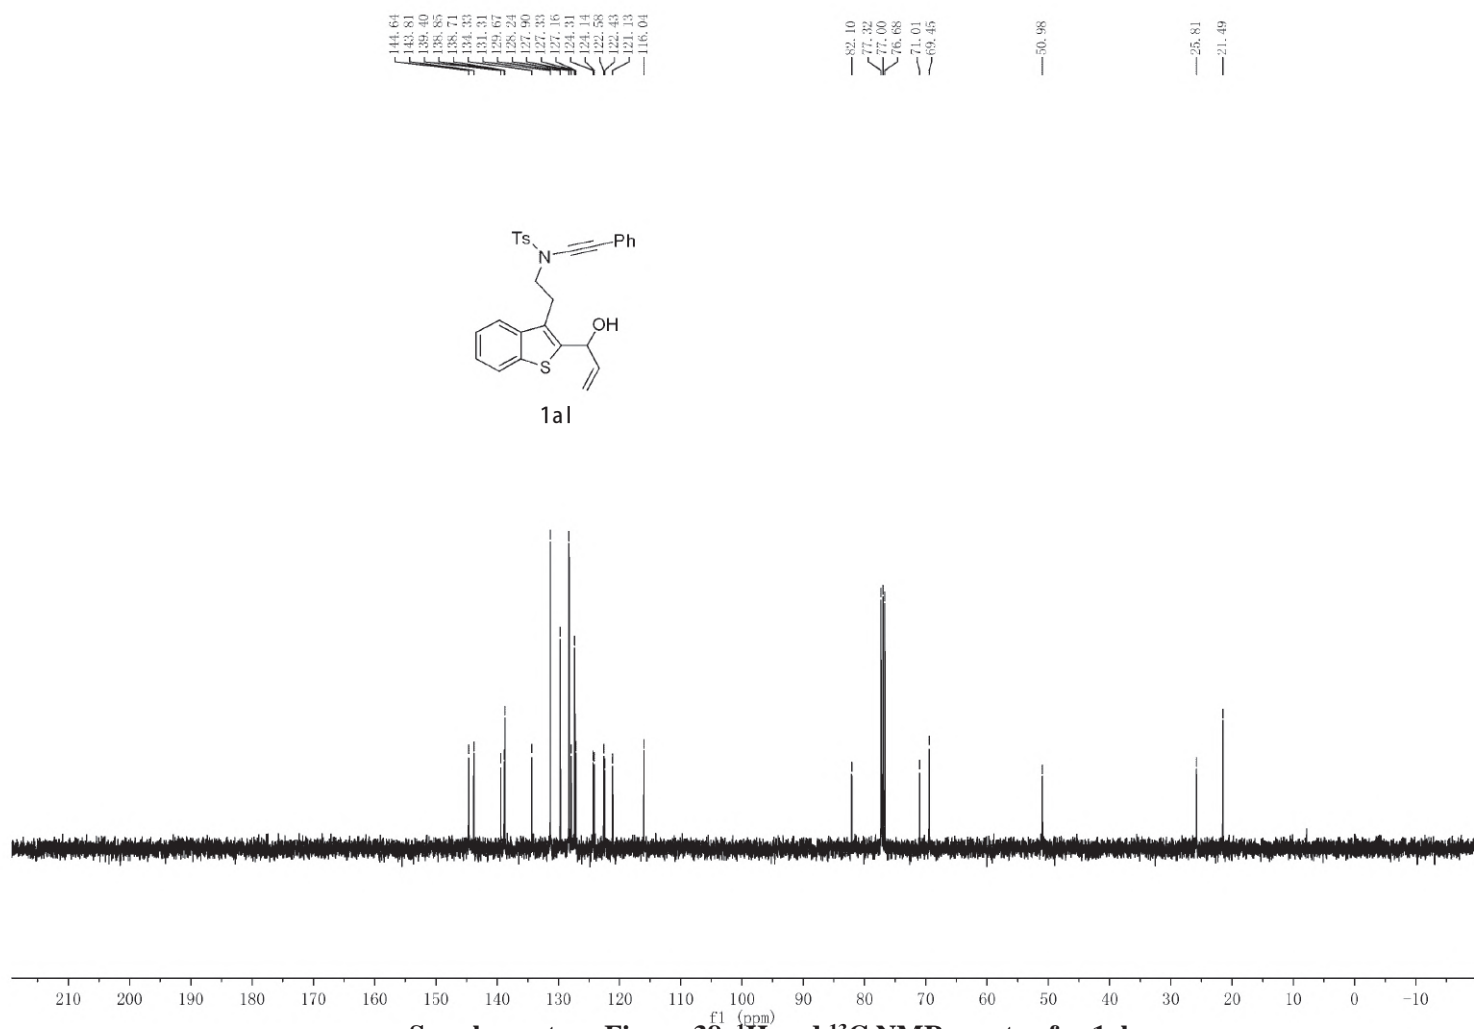

Supplementary Figure 38. <sup>1</sup>H and <sup>13</sup>C NMR spectra for 1a1

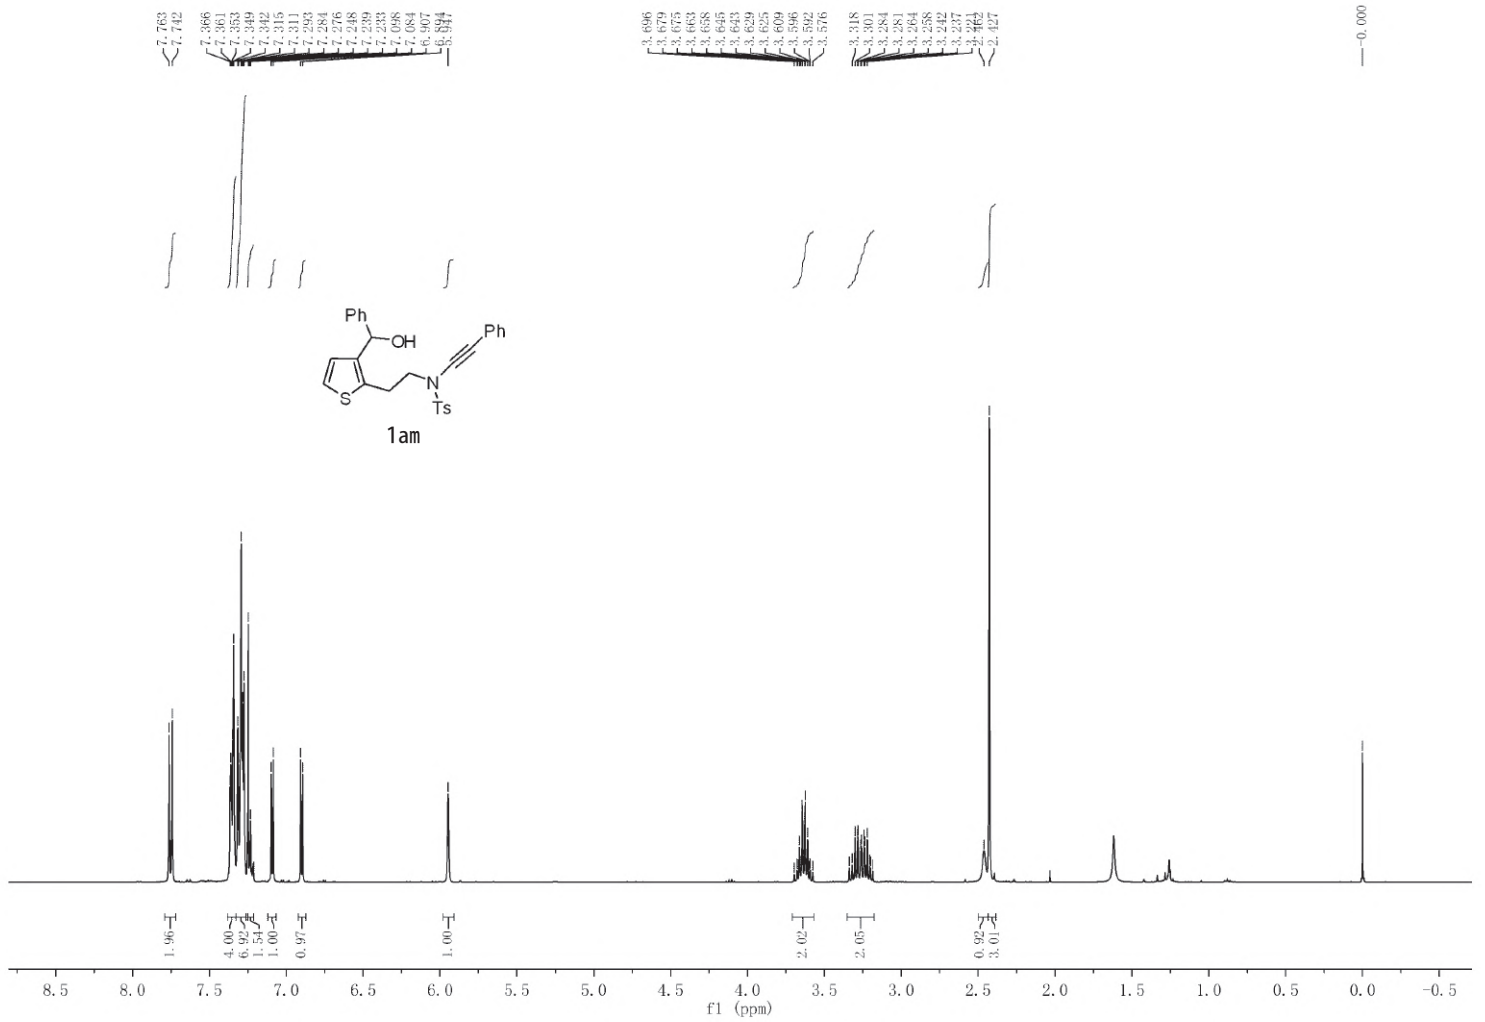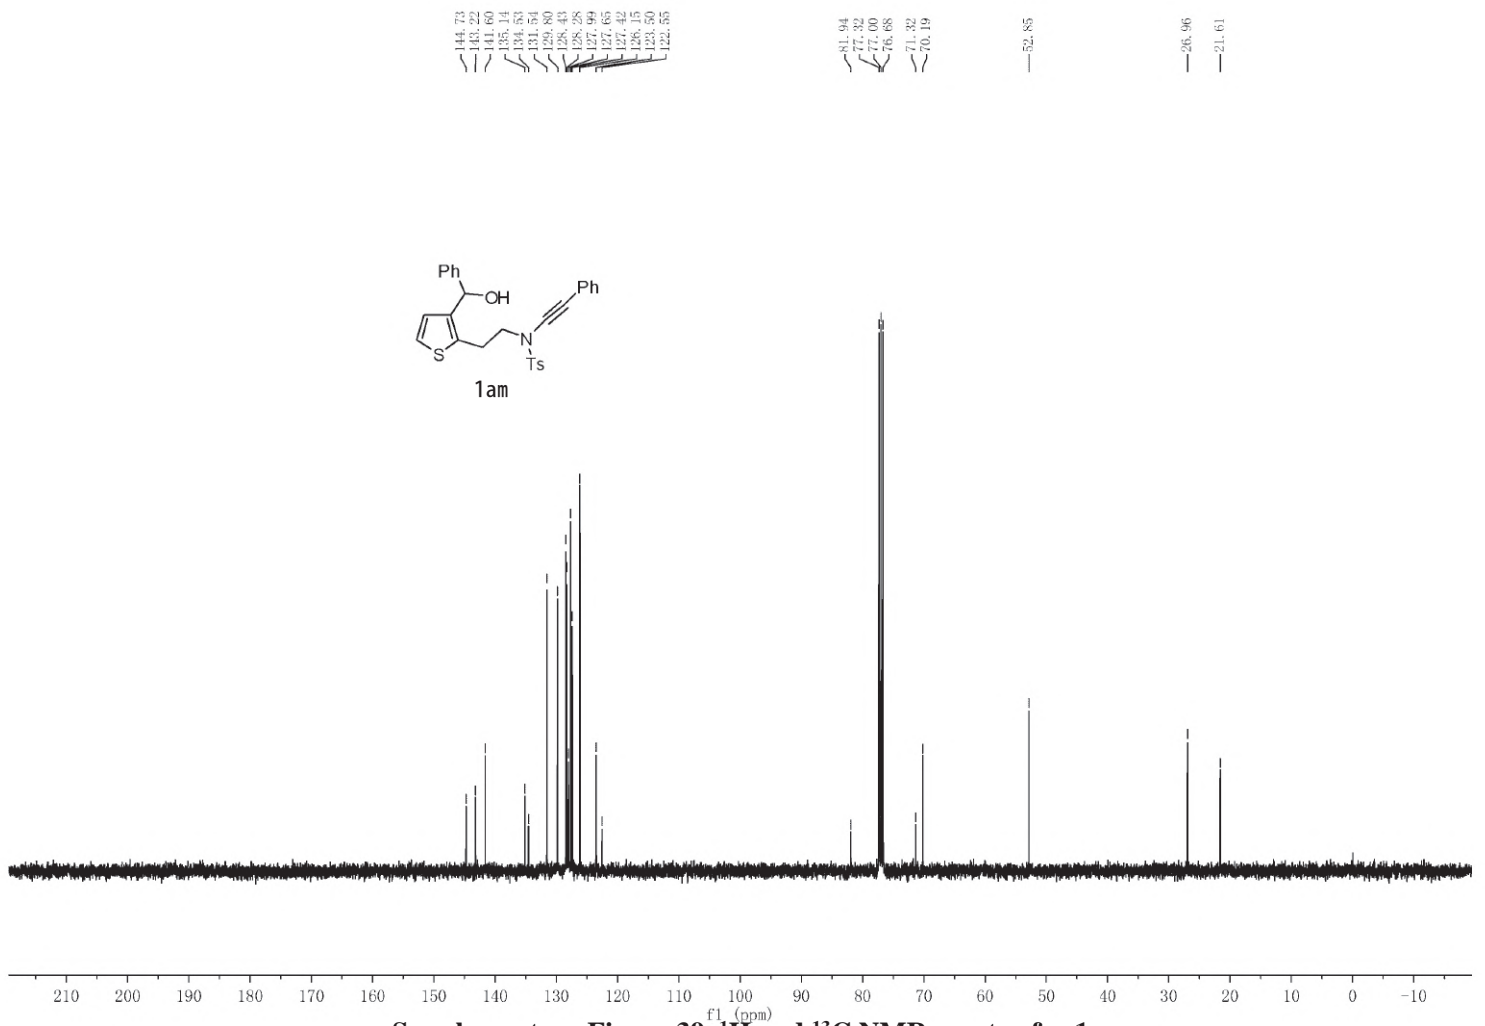

Supplementary Figure 39. <sup>1</sup>H and <sup>13</sup>C NMR spectra for 1am



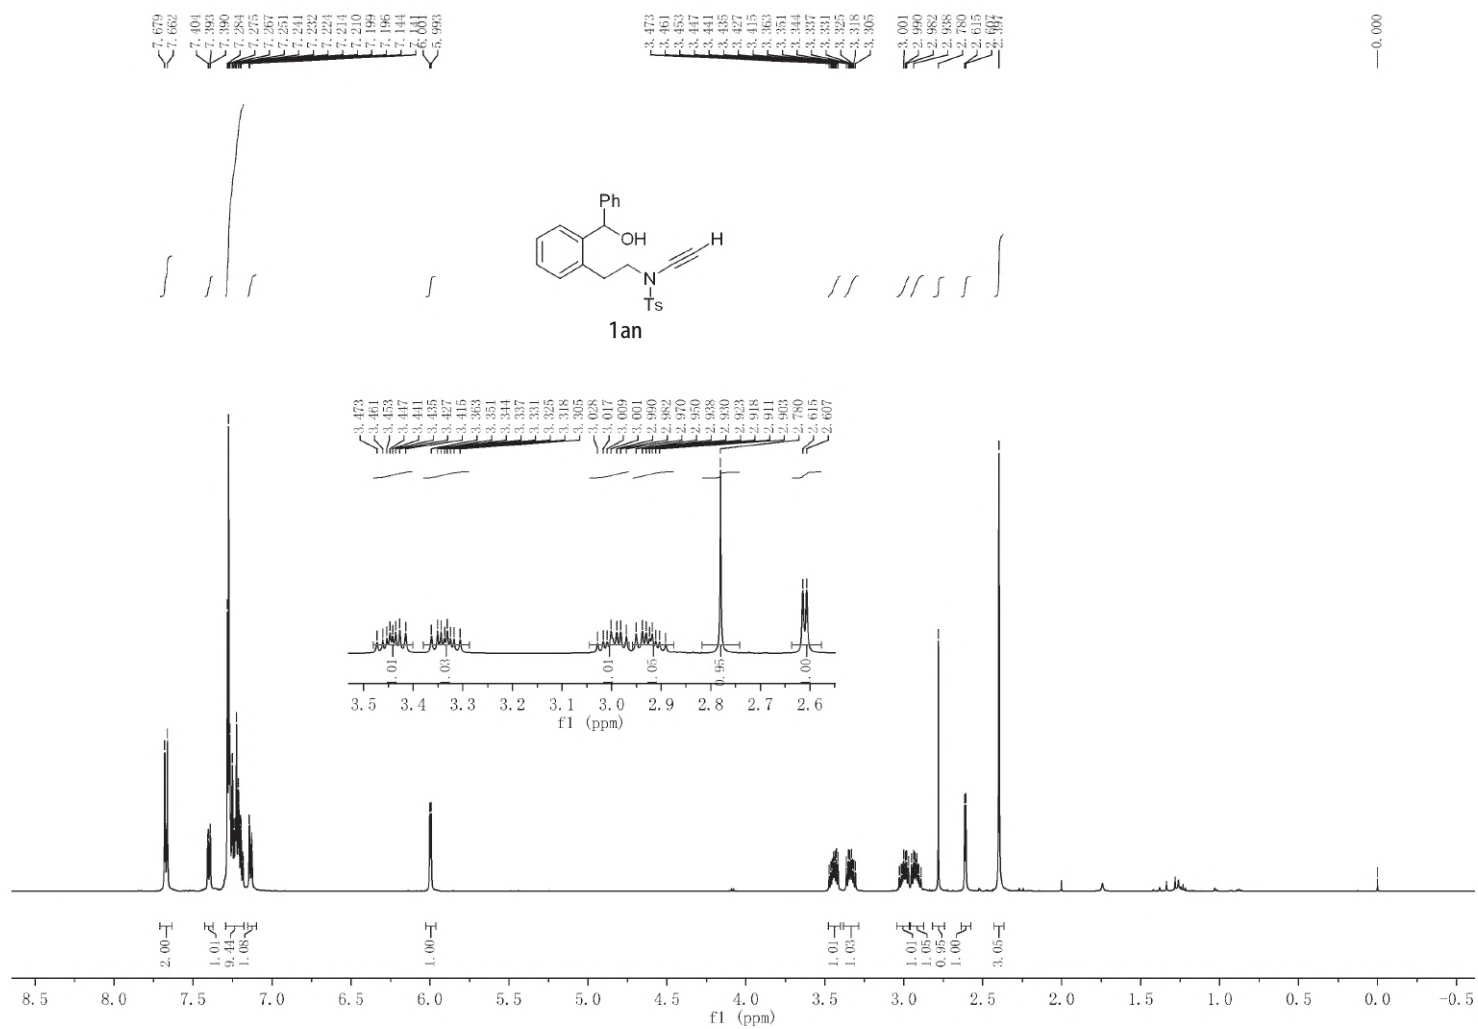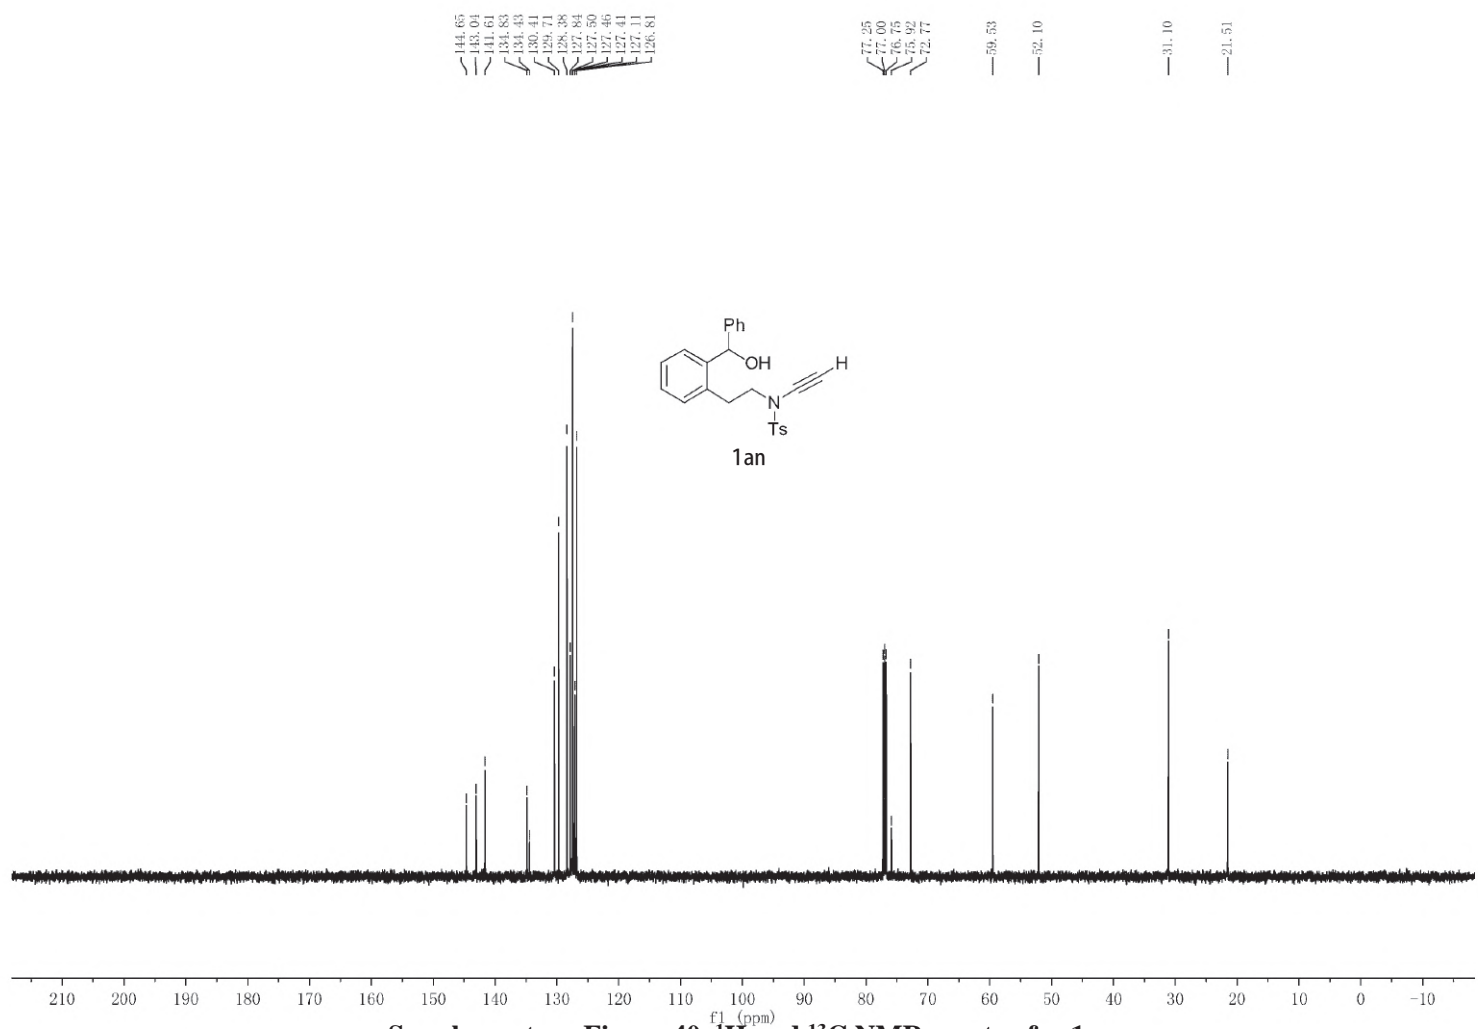

Supplementary Figure 40.  $^1\text{H}$  and  $^{13}\text{C}$  NMR spectra for **1an**

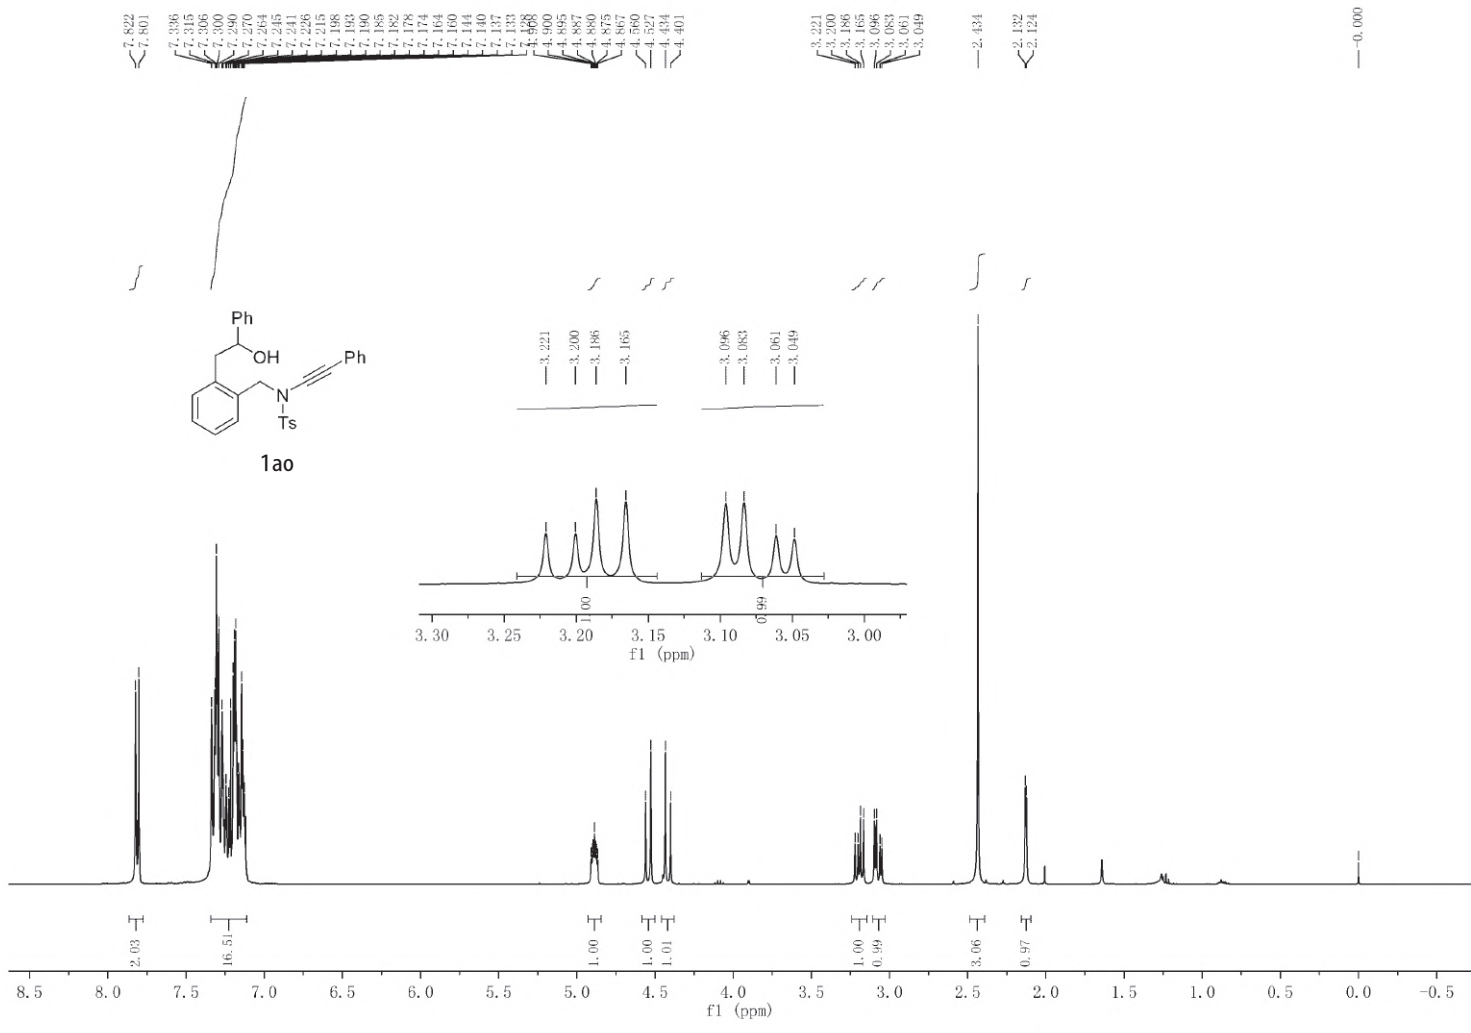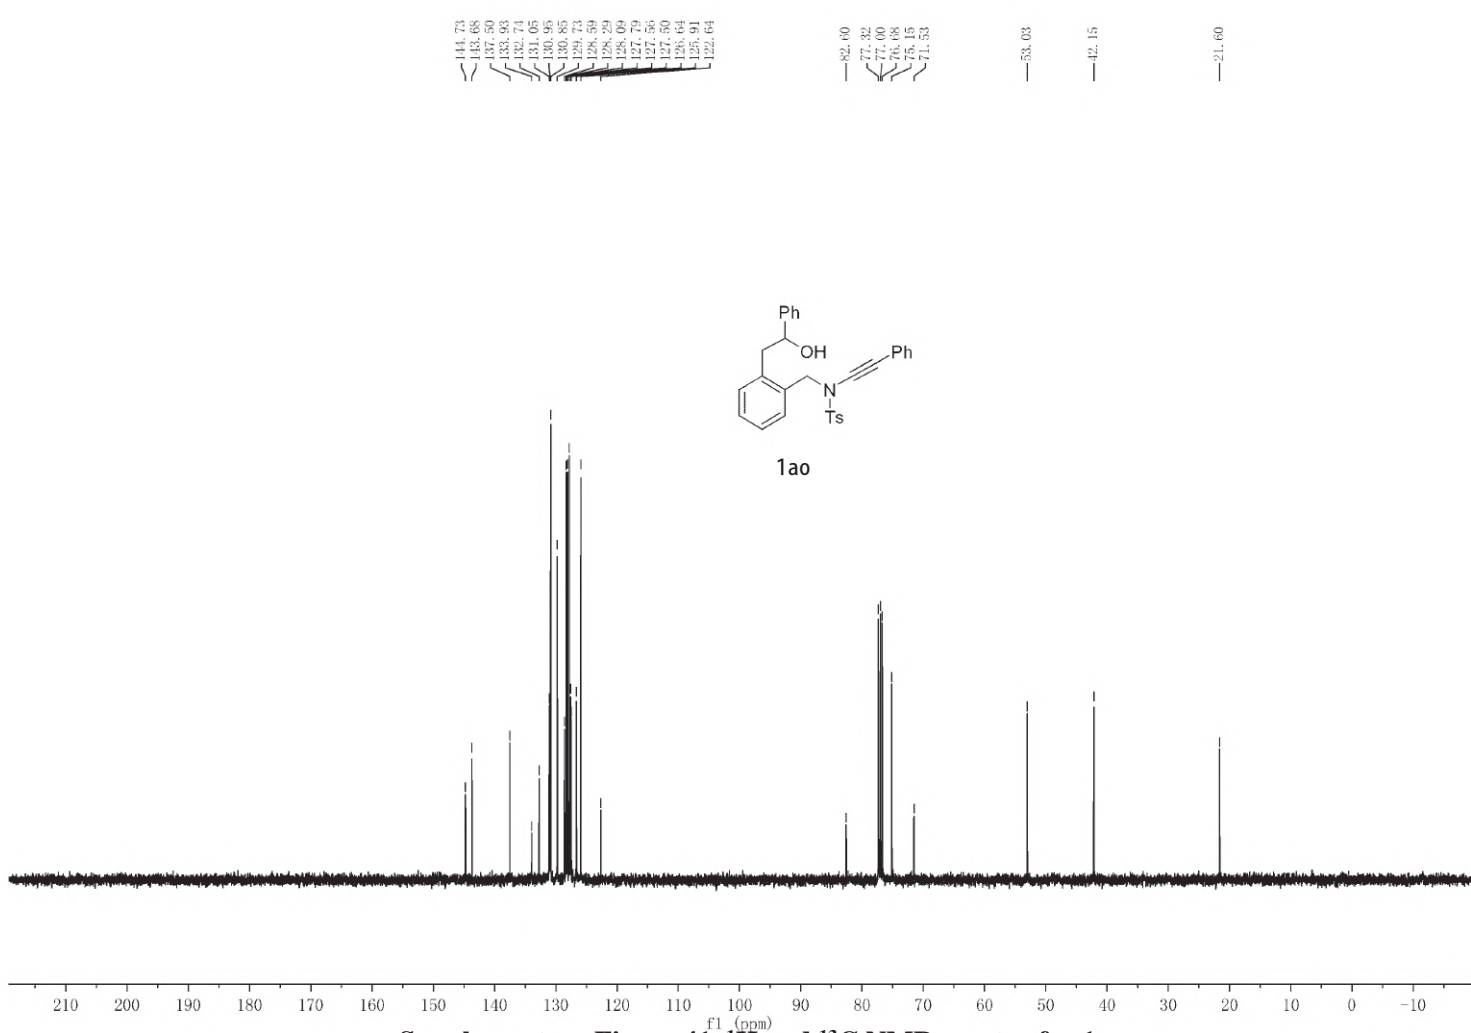

Supplementary Figure 41. <sup>1</sup>H and <sup>13</sup>C NMR spectra for 1ao

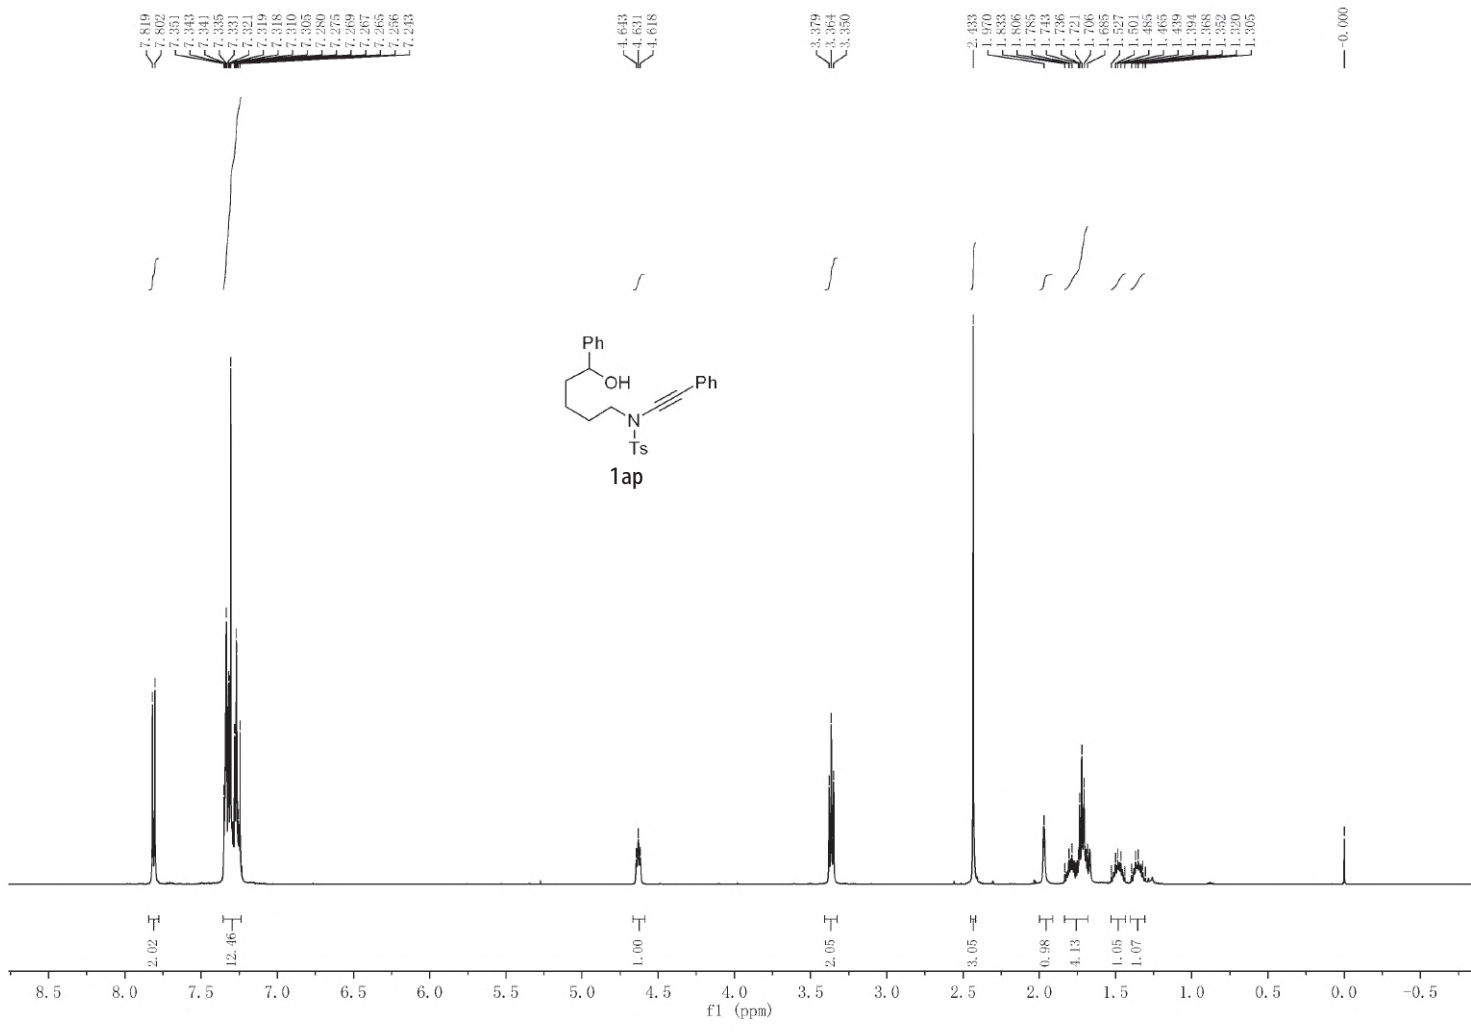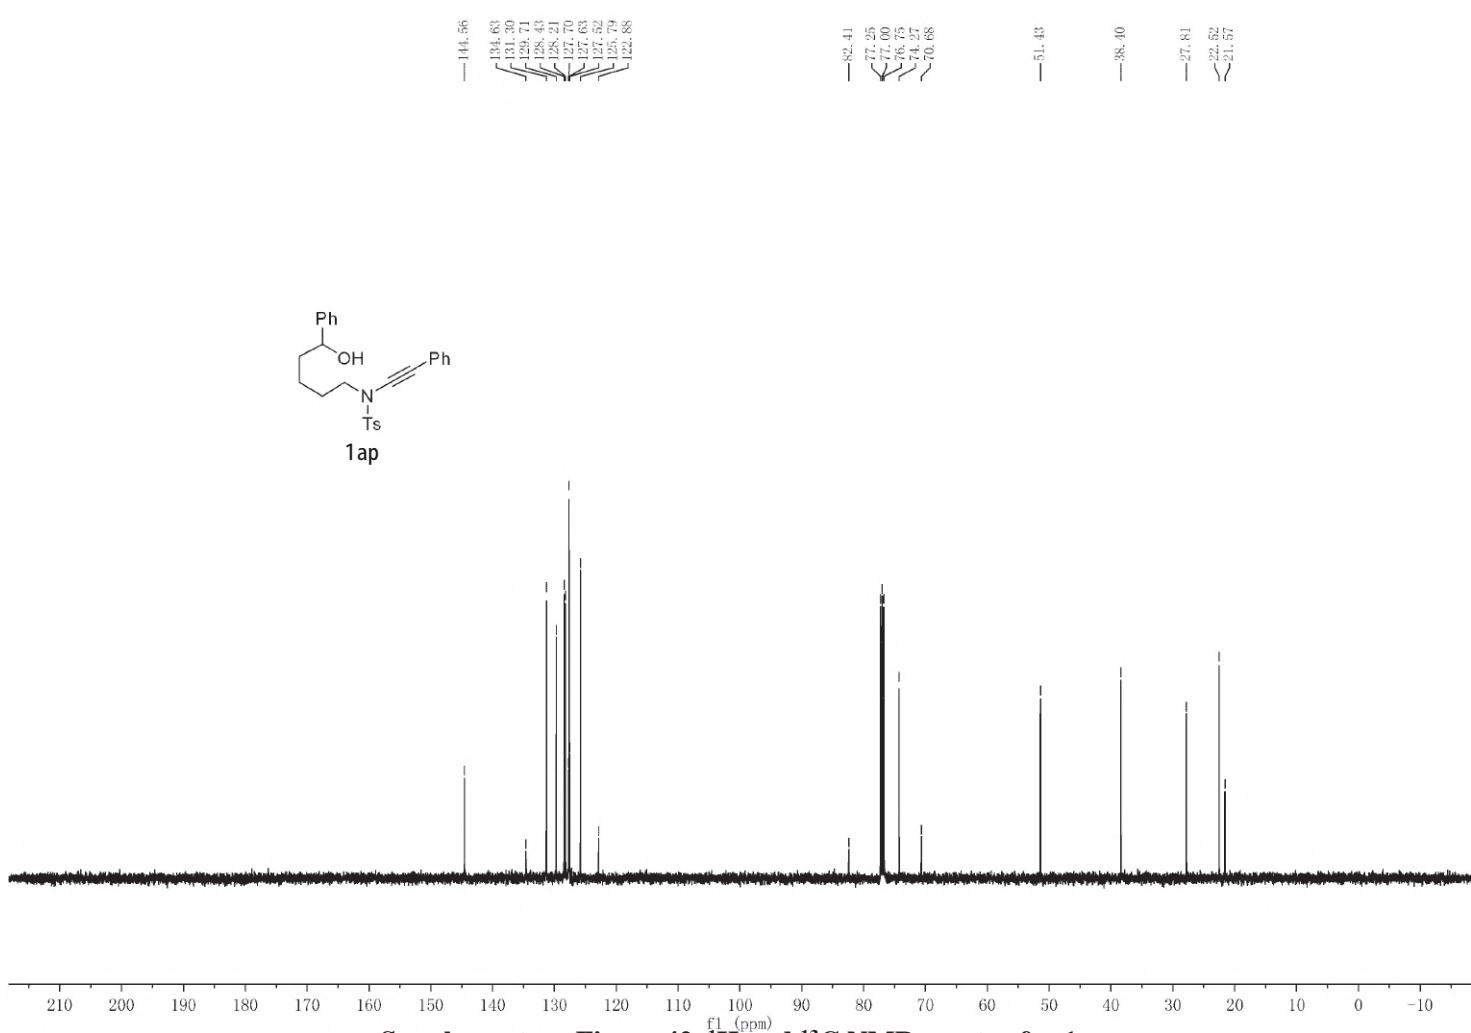

Supplementary Figure 42. <sup>1</sup>H and <sup>13</sup>C NMR spectra for 1ap

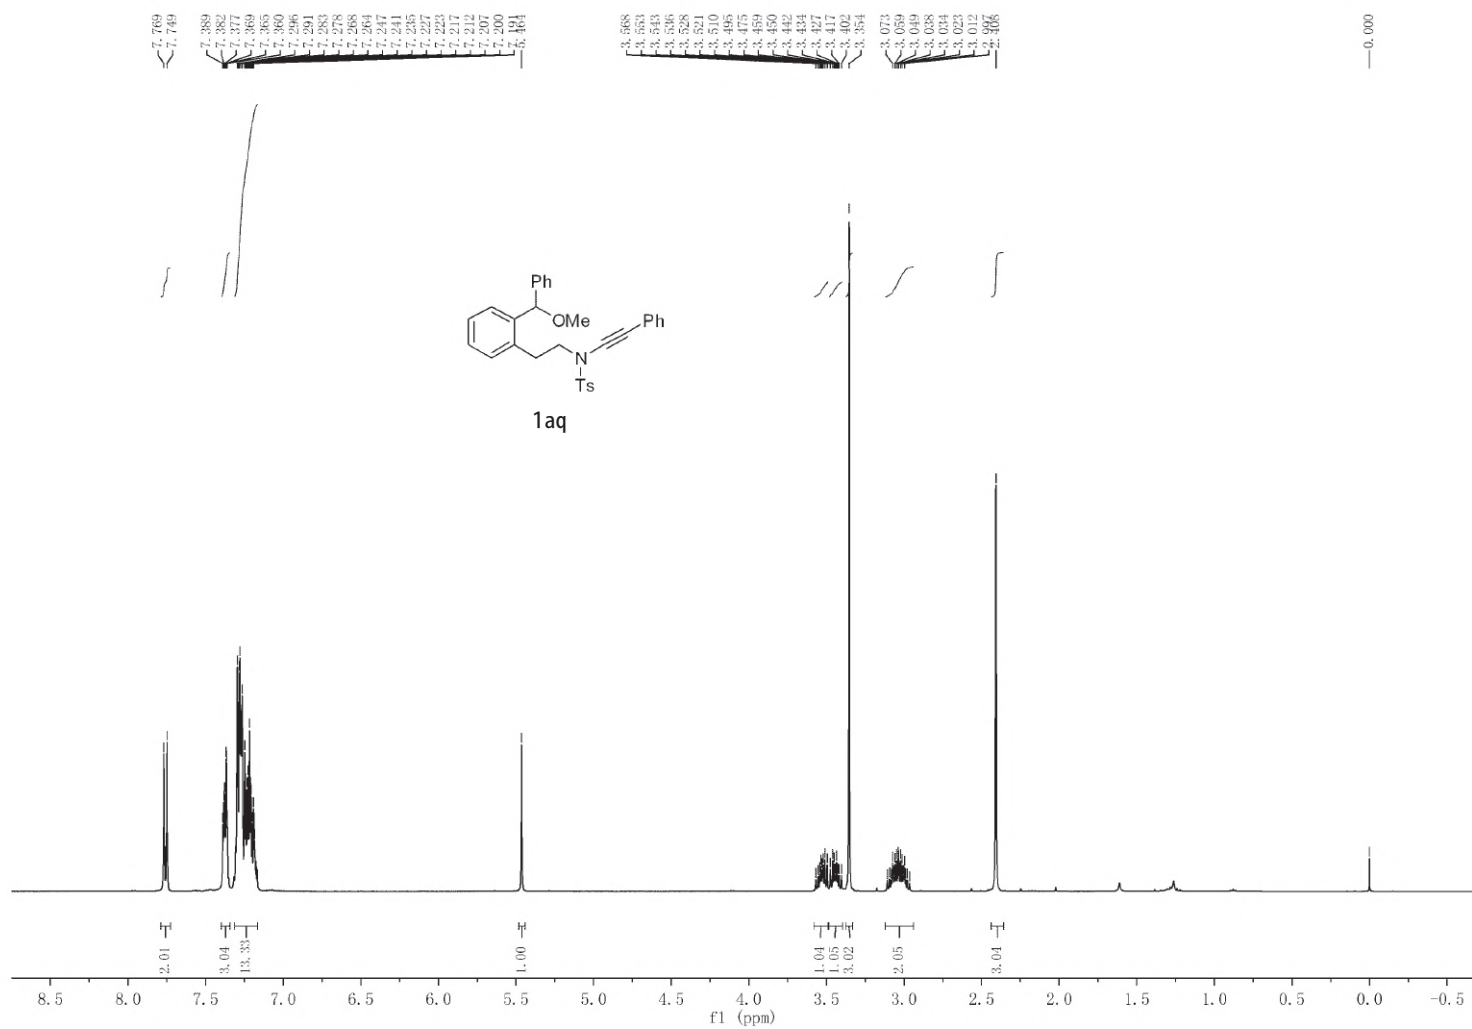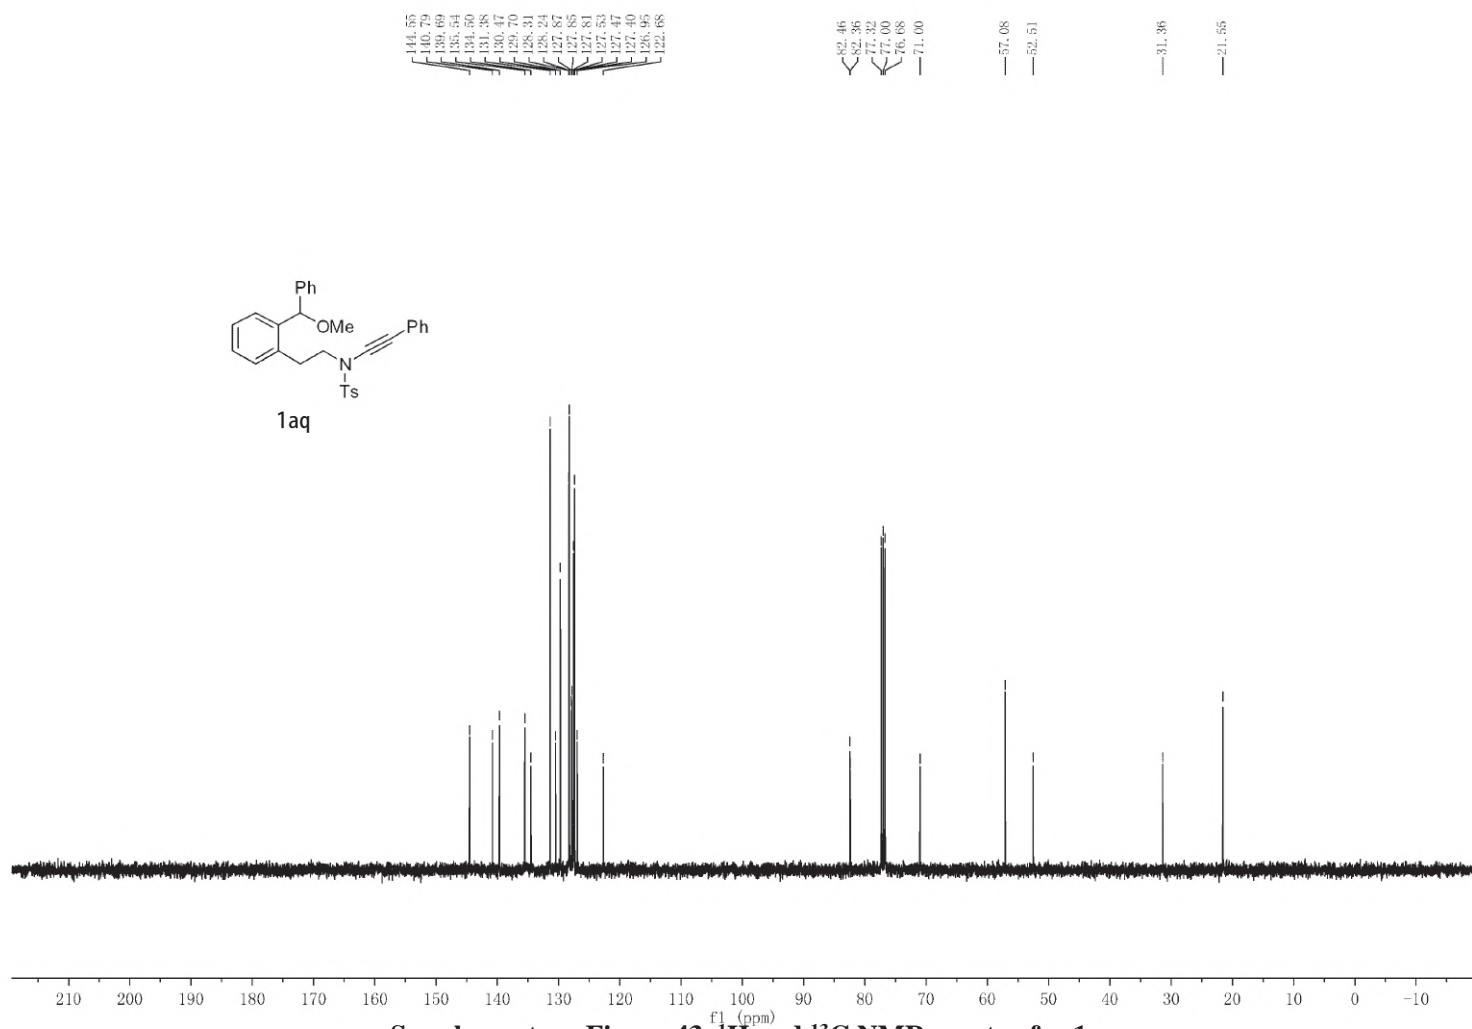

Supplementary Figure 43. <sup>1</sup>H and <sup>13</sup>C NMR spectra for 1aq



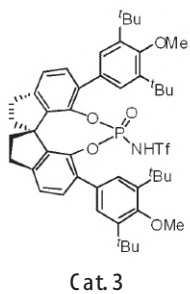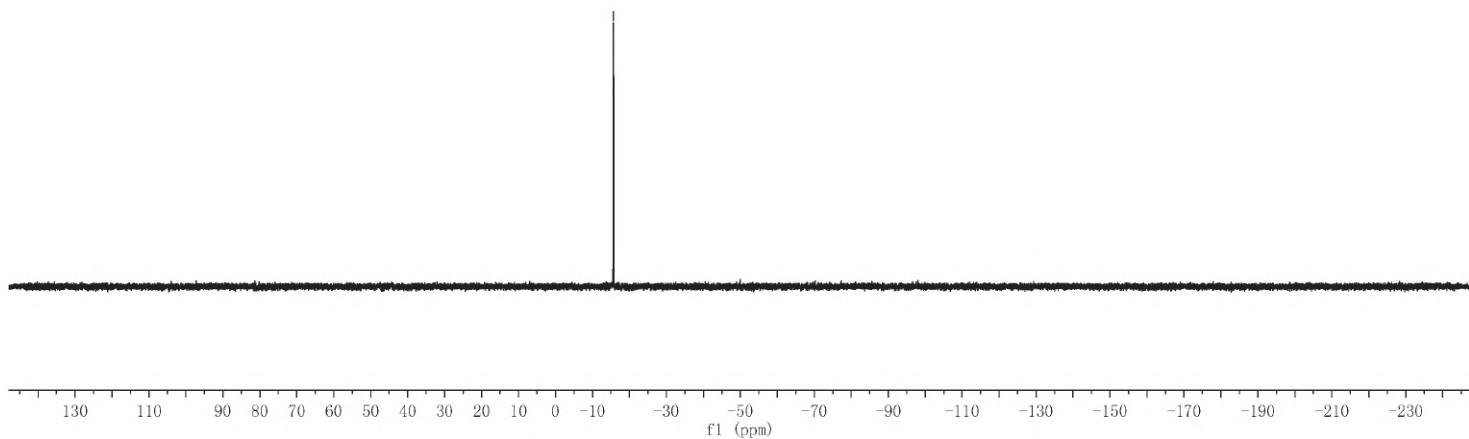

-77.360

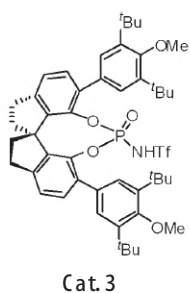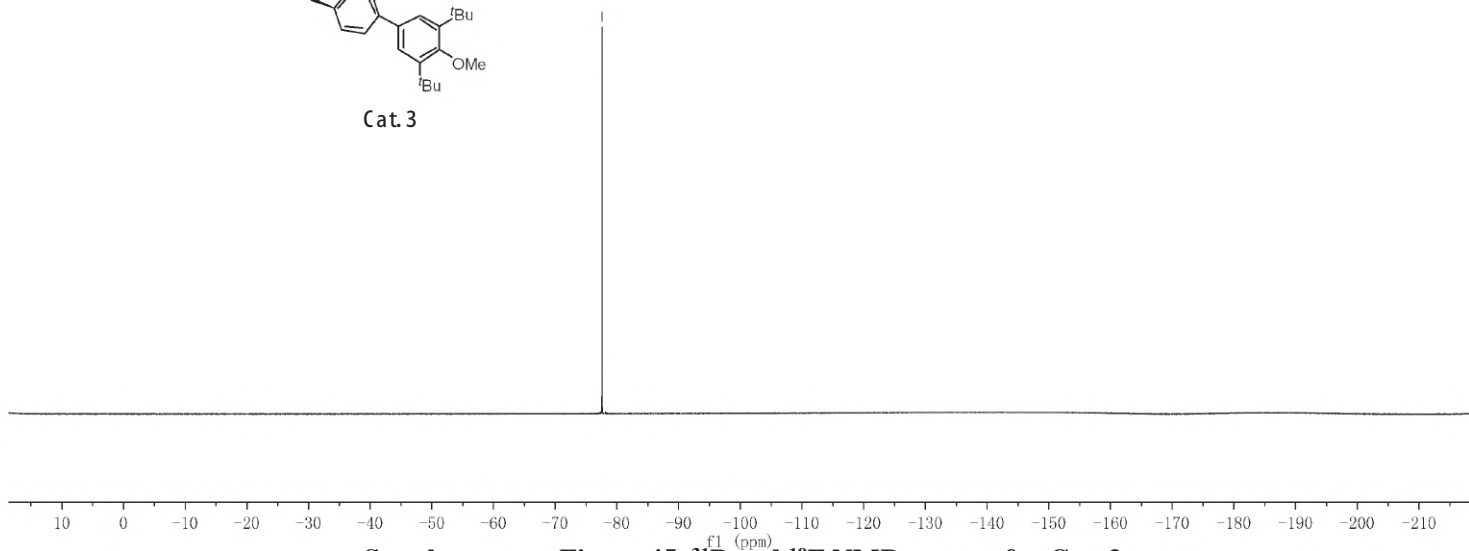

Supplementary Figure 45. <sup>31</sup>P and <sup>19</sup>F NMR spectra for Cat. 3







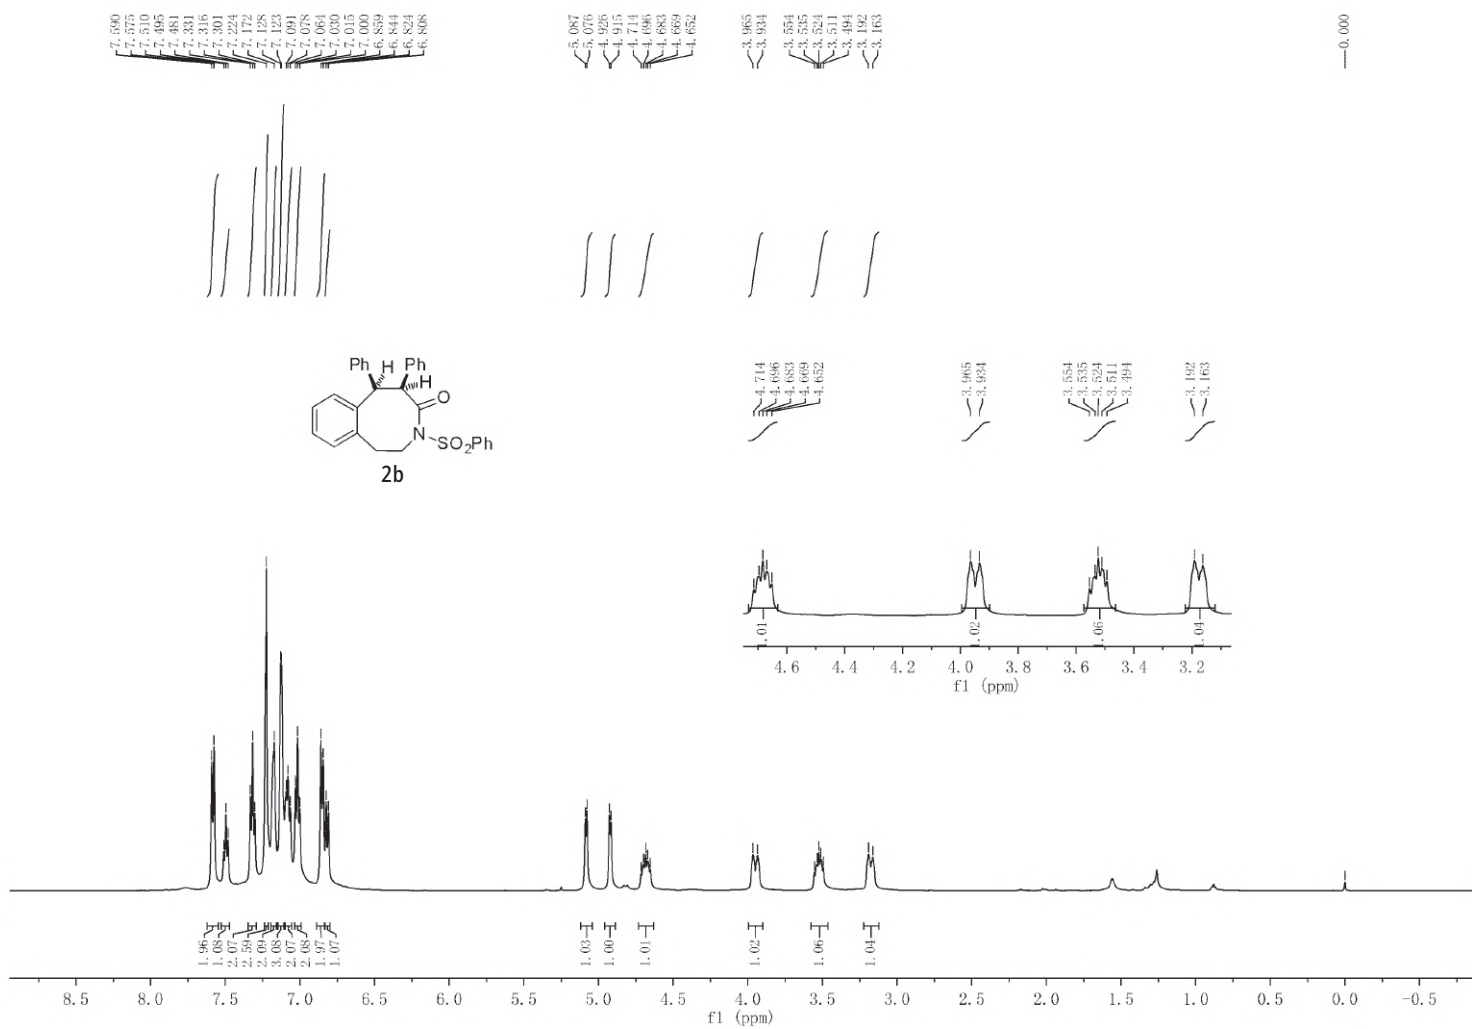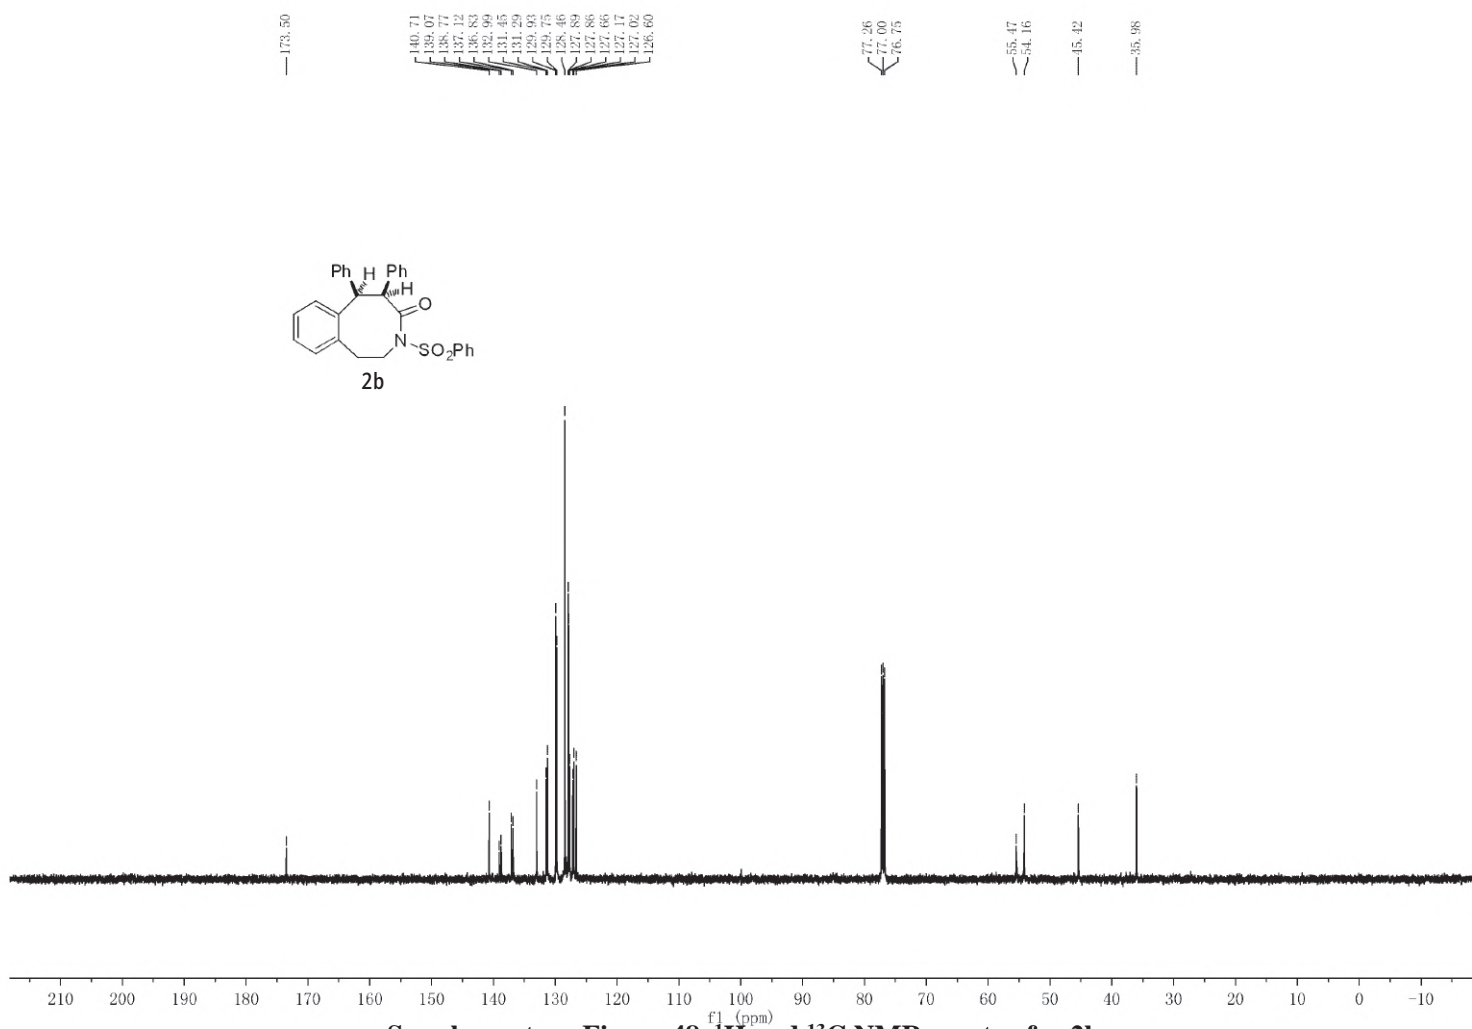

Supplementary Figure 48. <sup>1</sup>H and <sup>13</sup>C NMR spectra for 2b

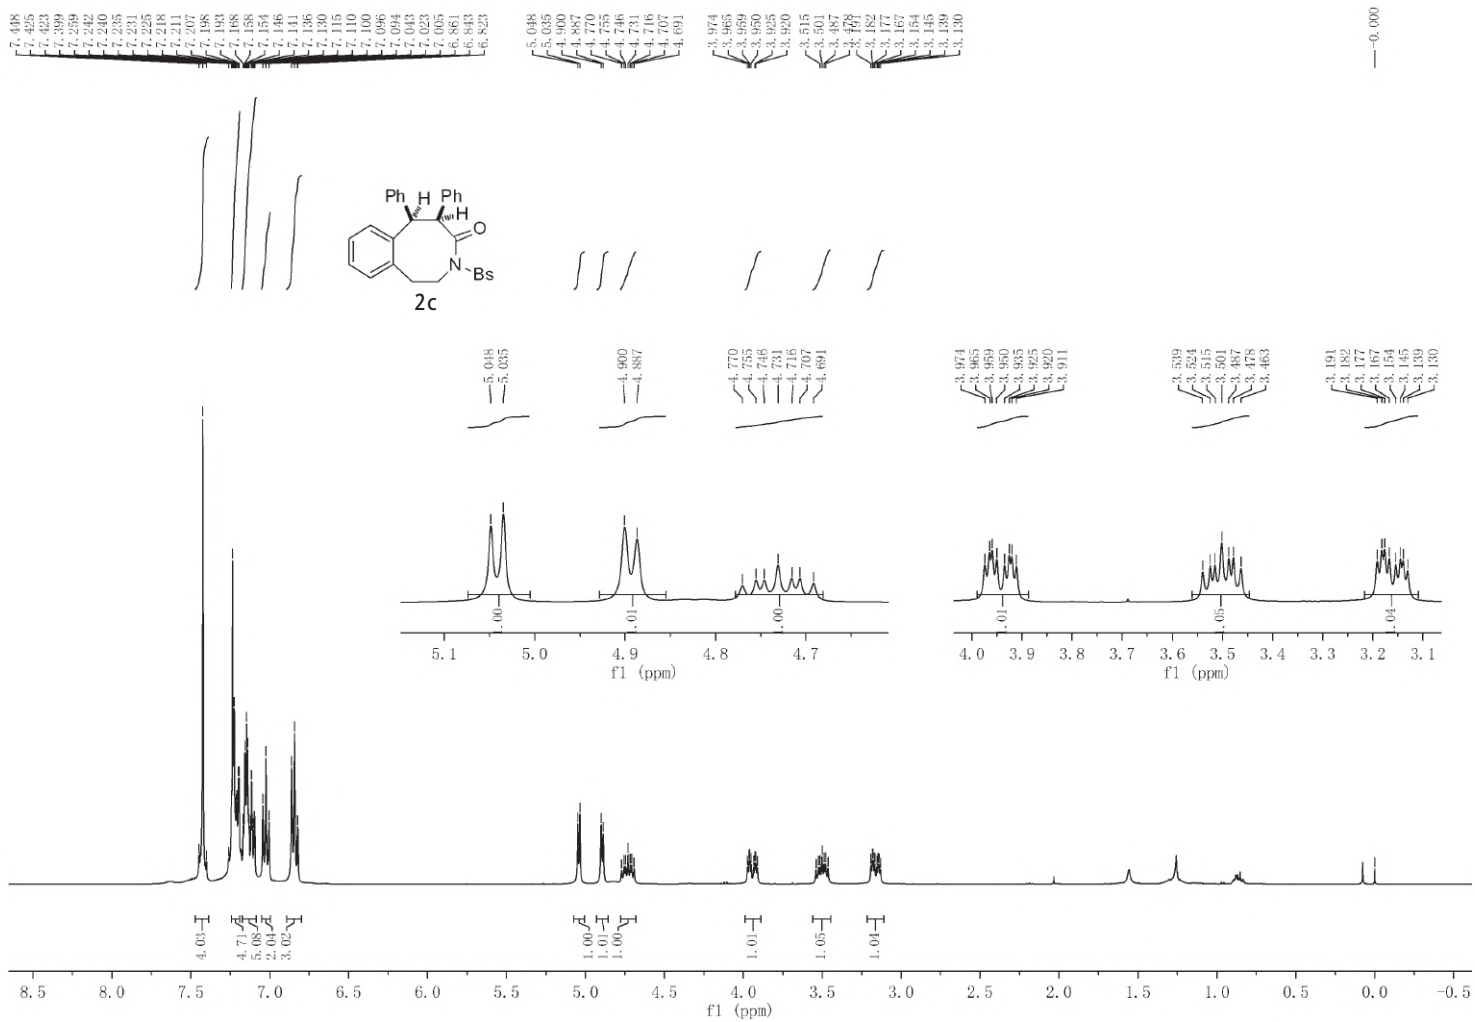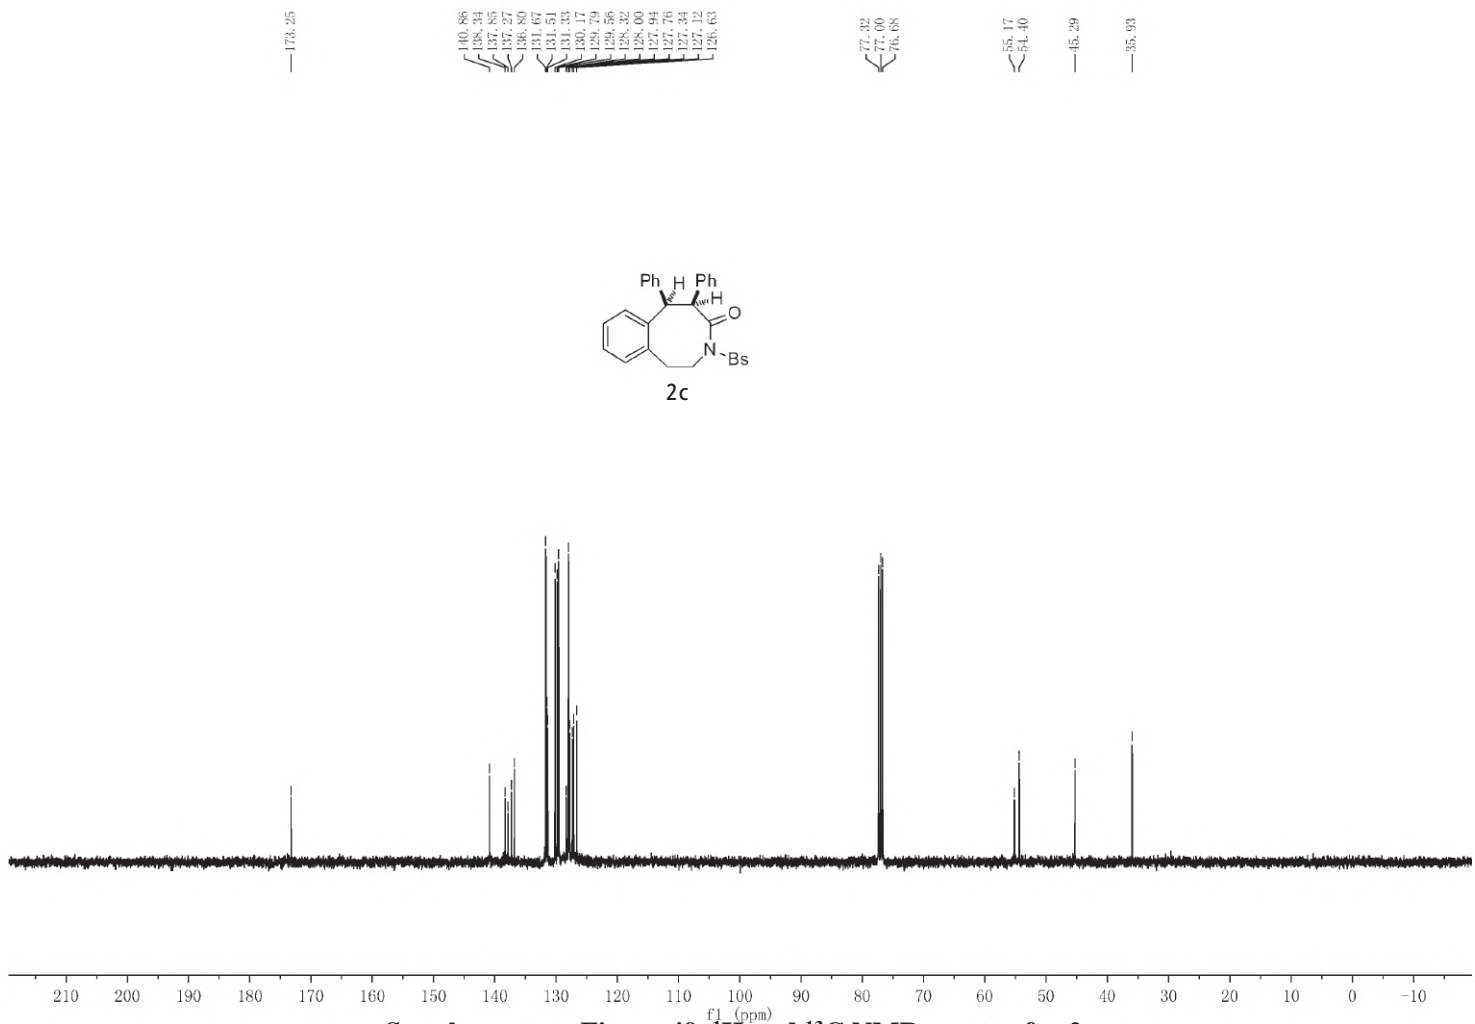

Supplementary Figure 49. <sup>1</sup>H and <sup>13</sup>C NMR spectra for 2c

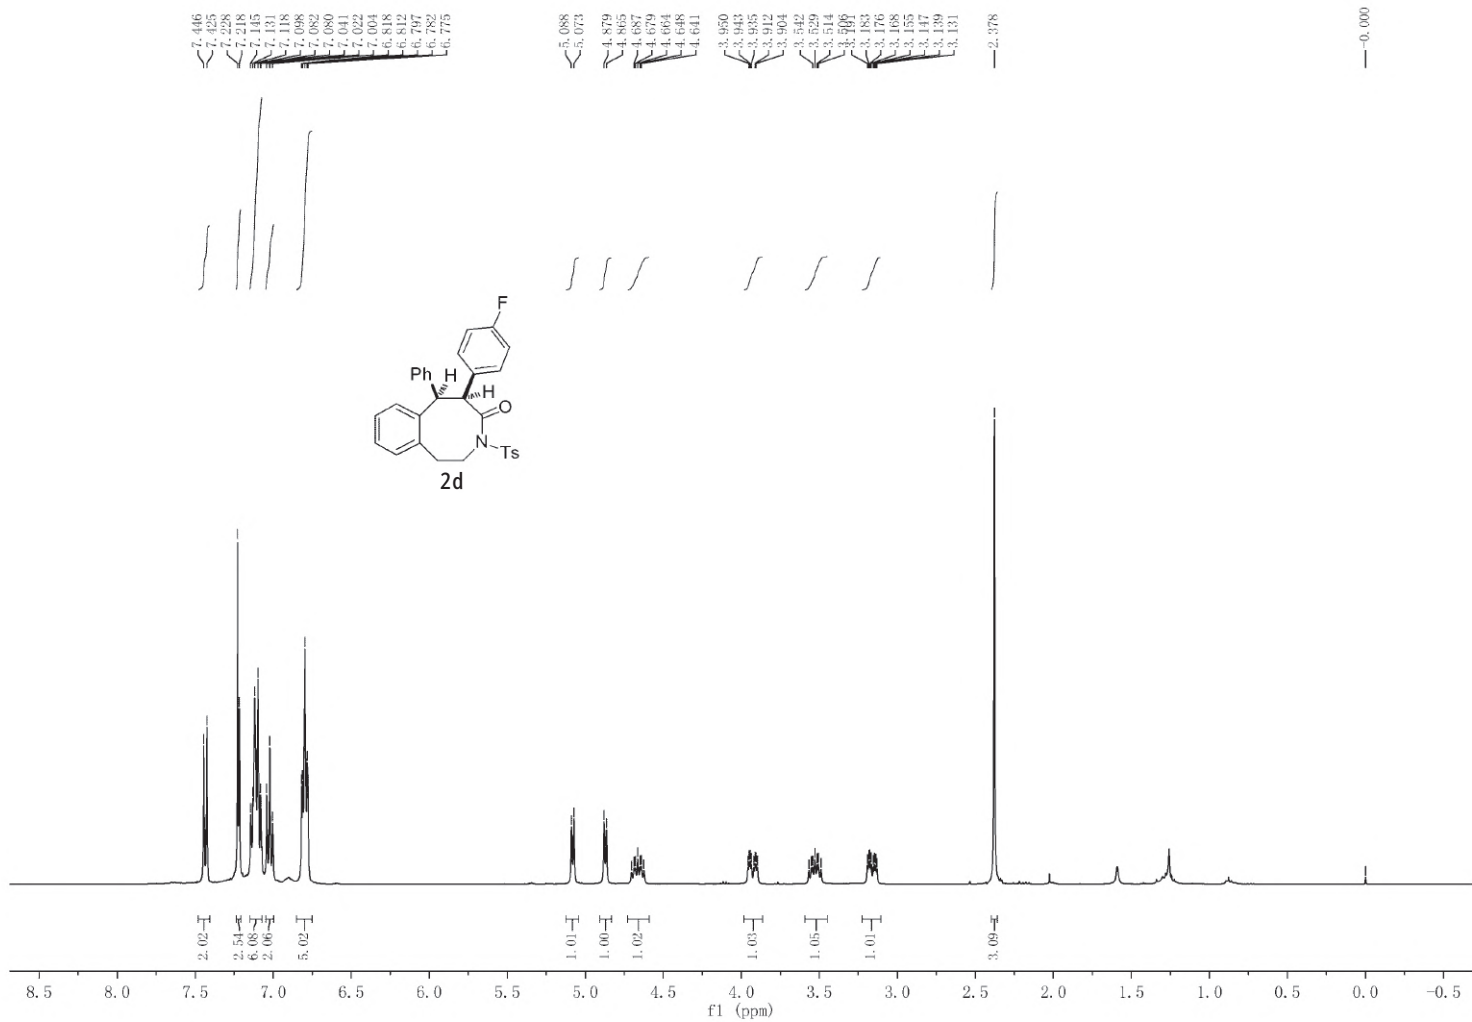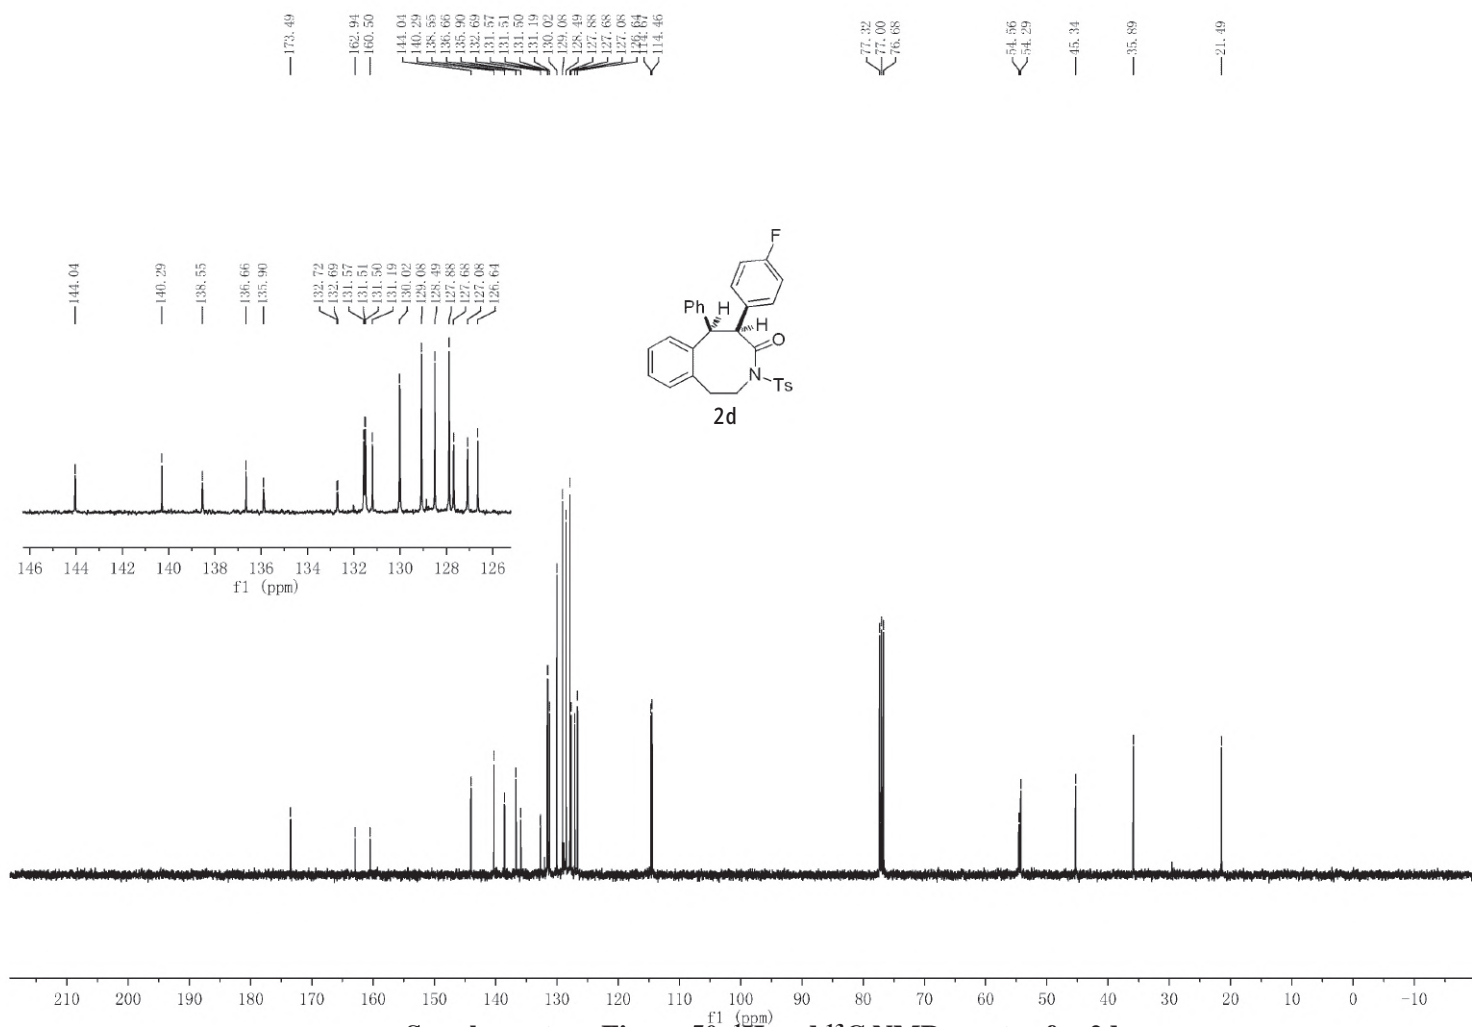

Supplementary Figure 50. <sup>1</sup>H and <sup>13</sup>C NMR spectra for 2d

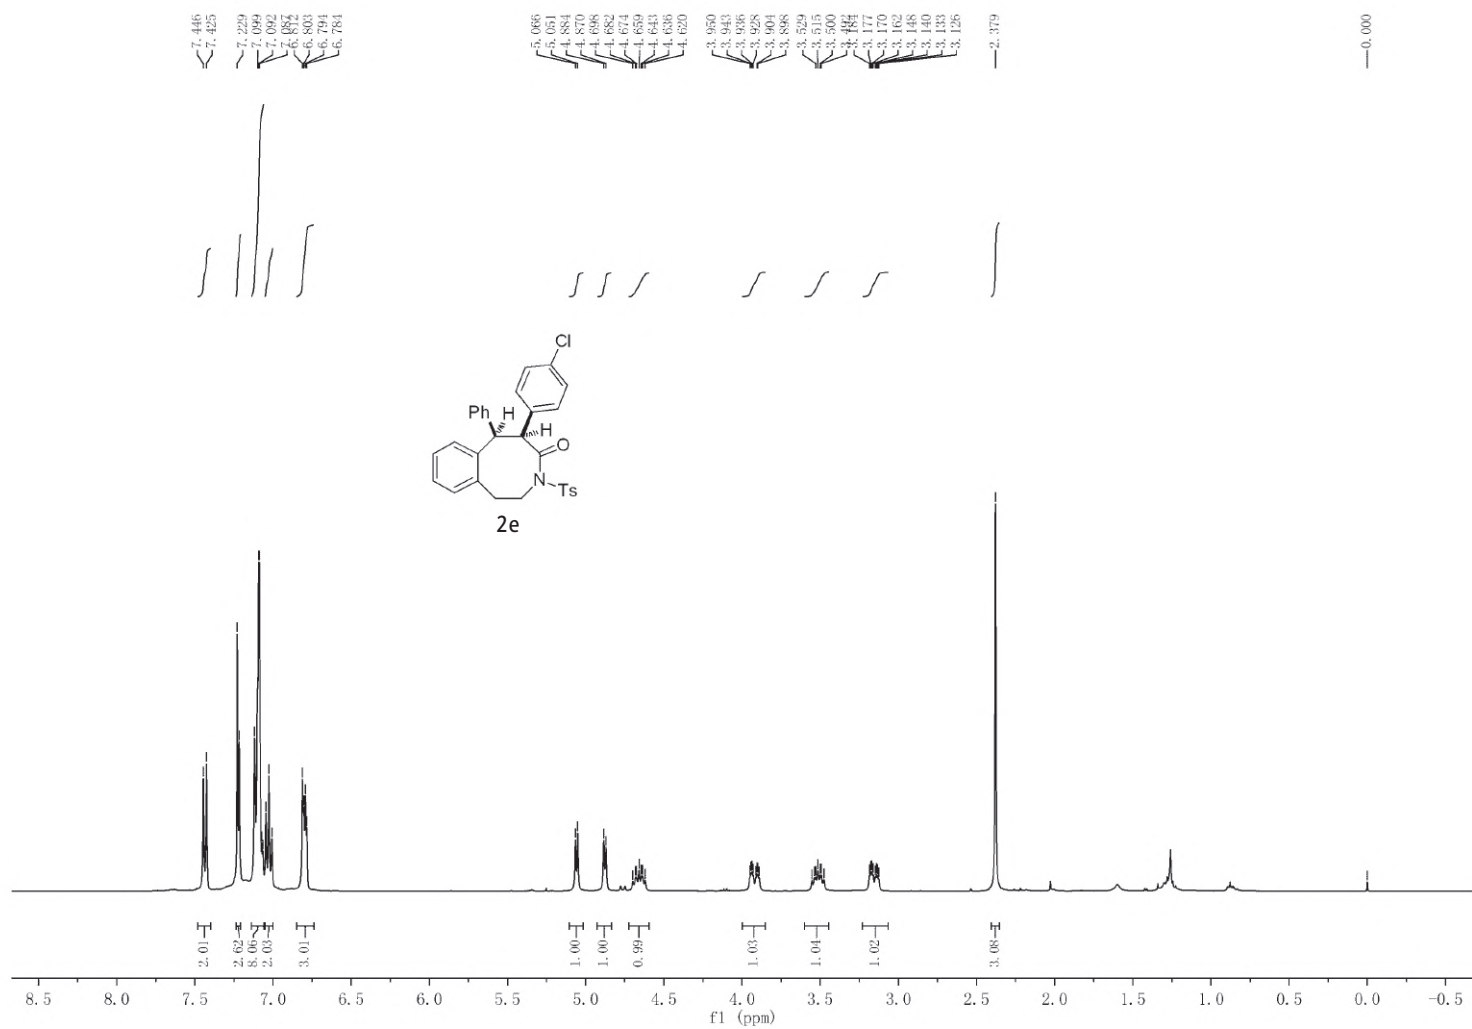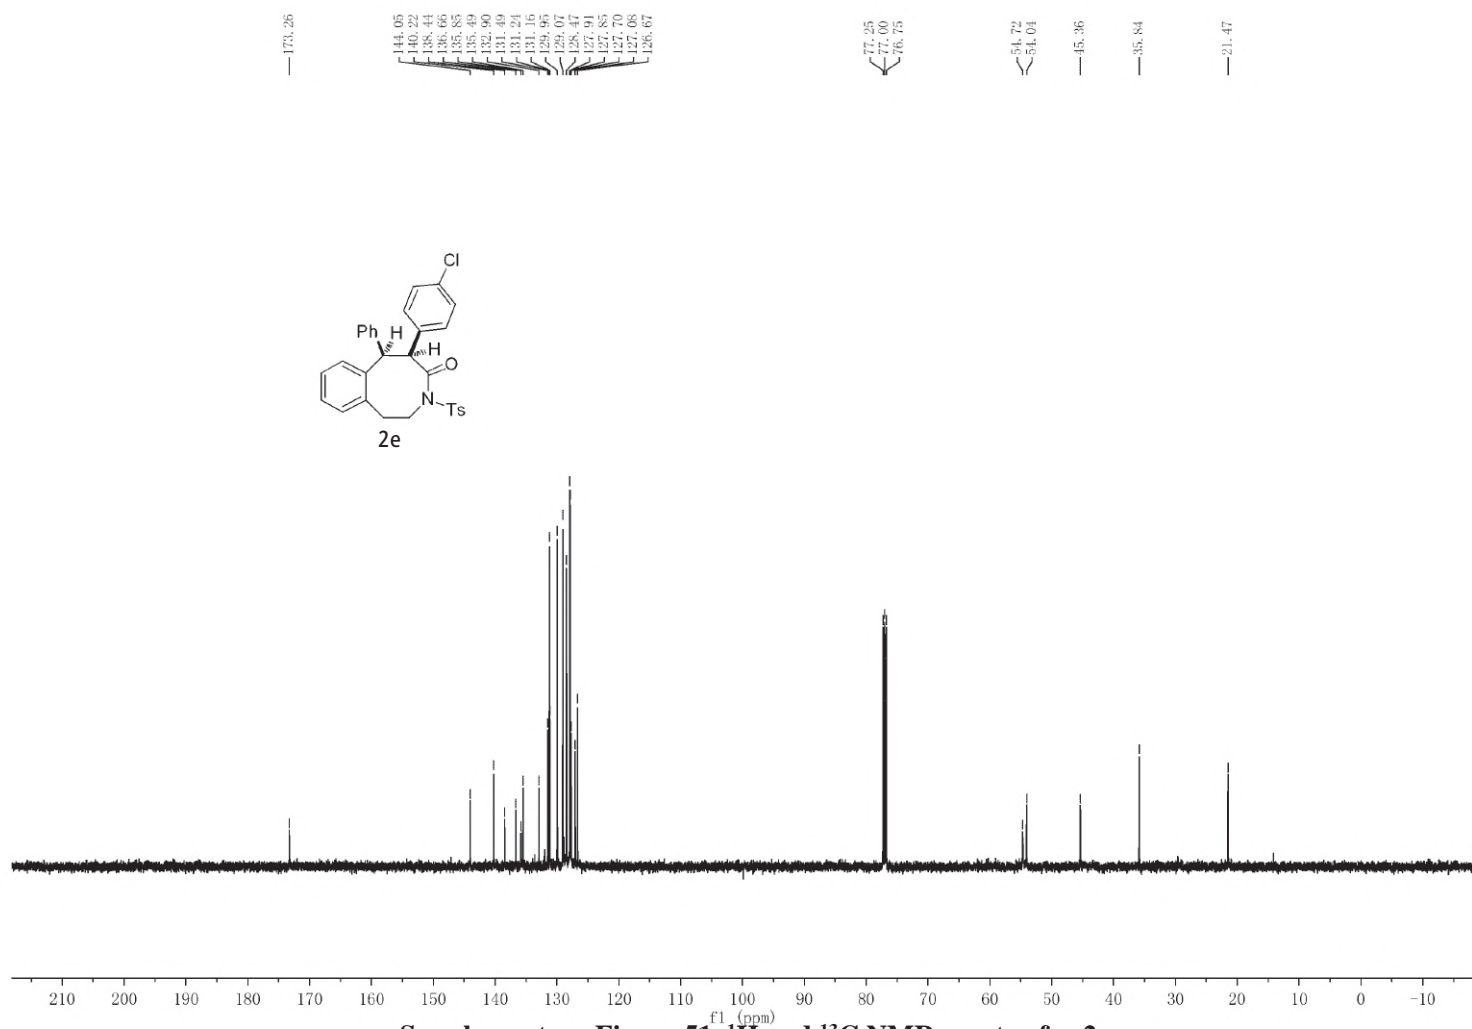

Supplementary Figure 51. <sup>1</sup>H and <sup>13</sup>C NMR spectra for 2e

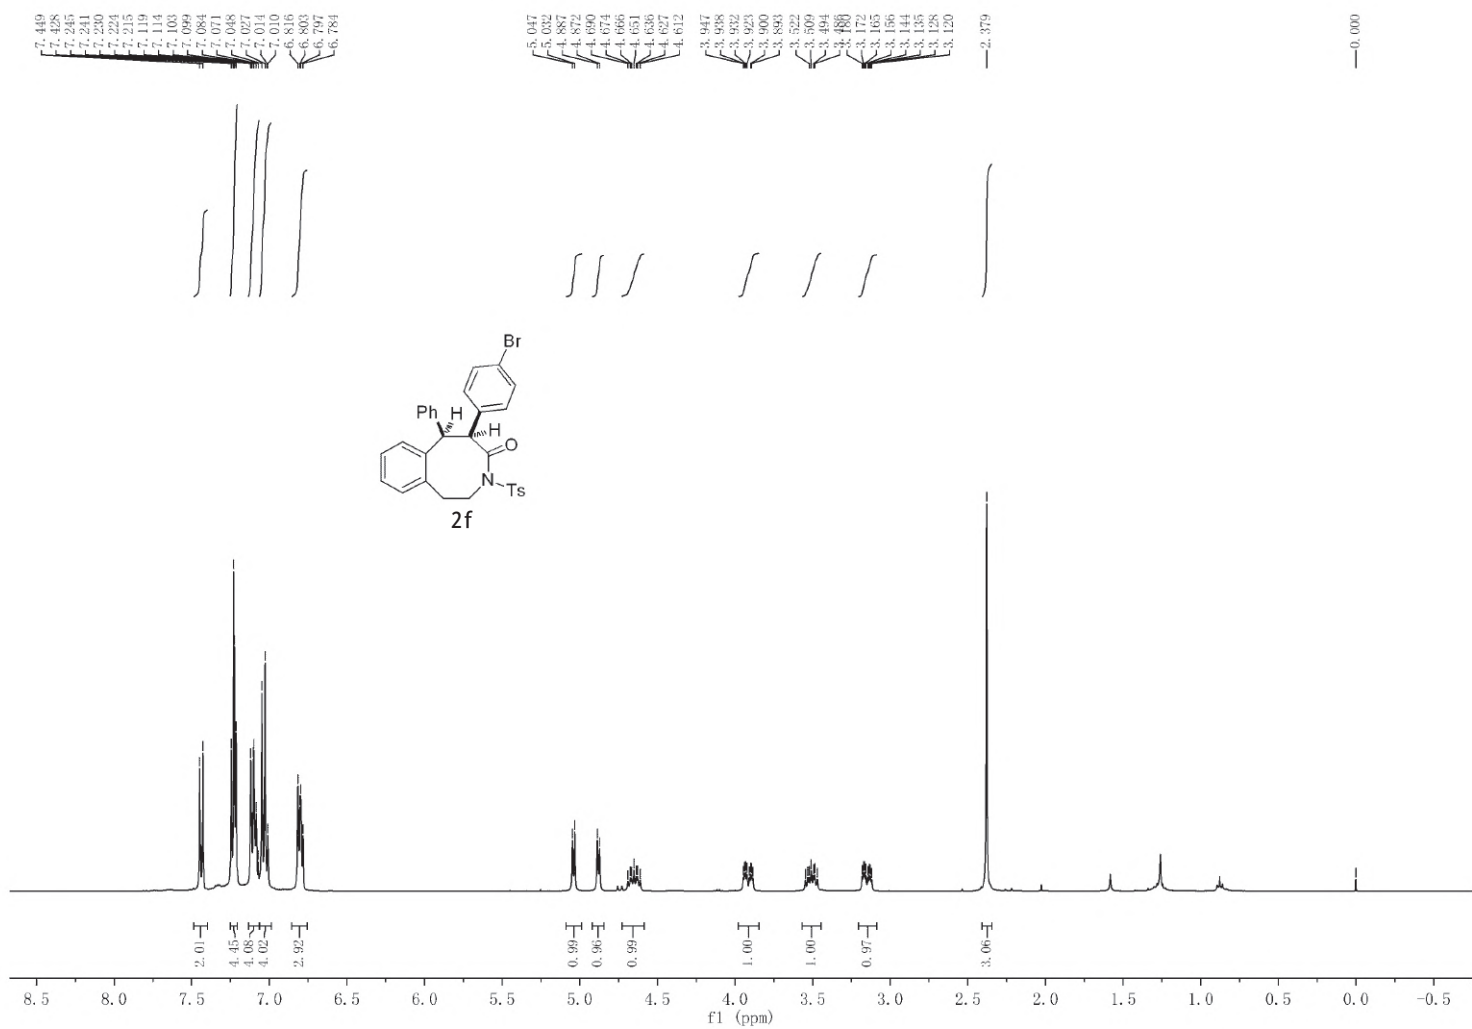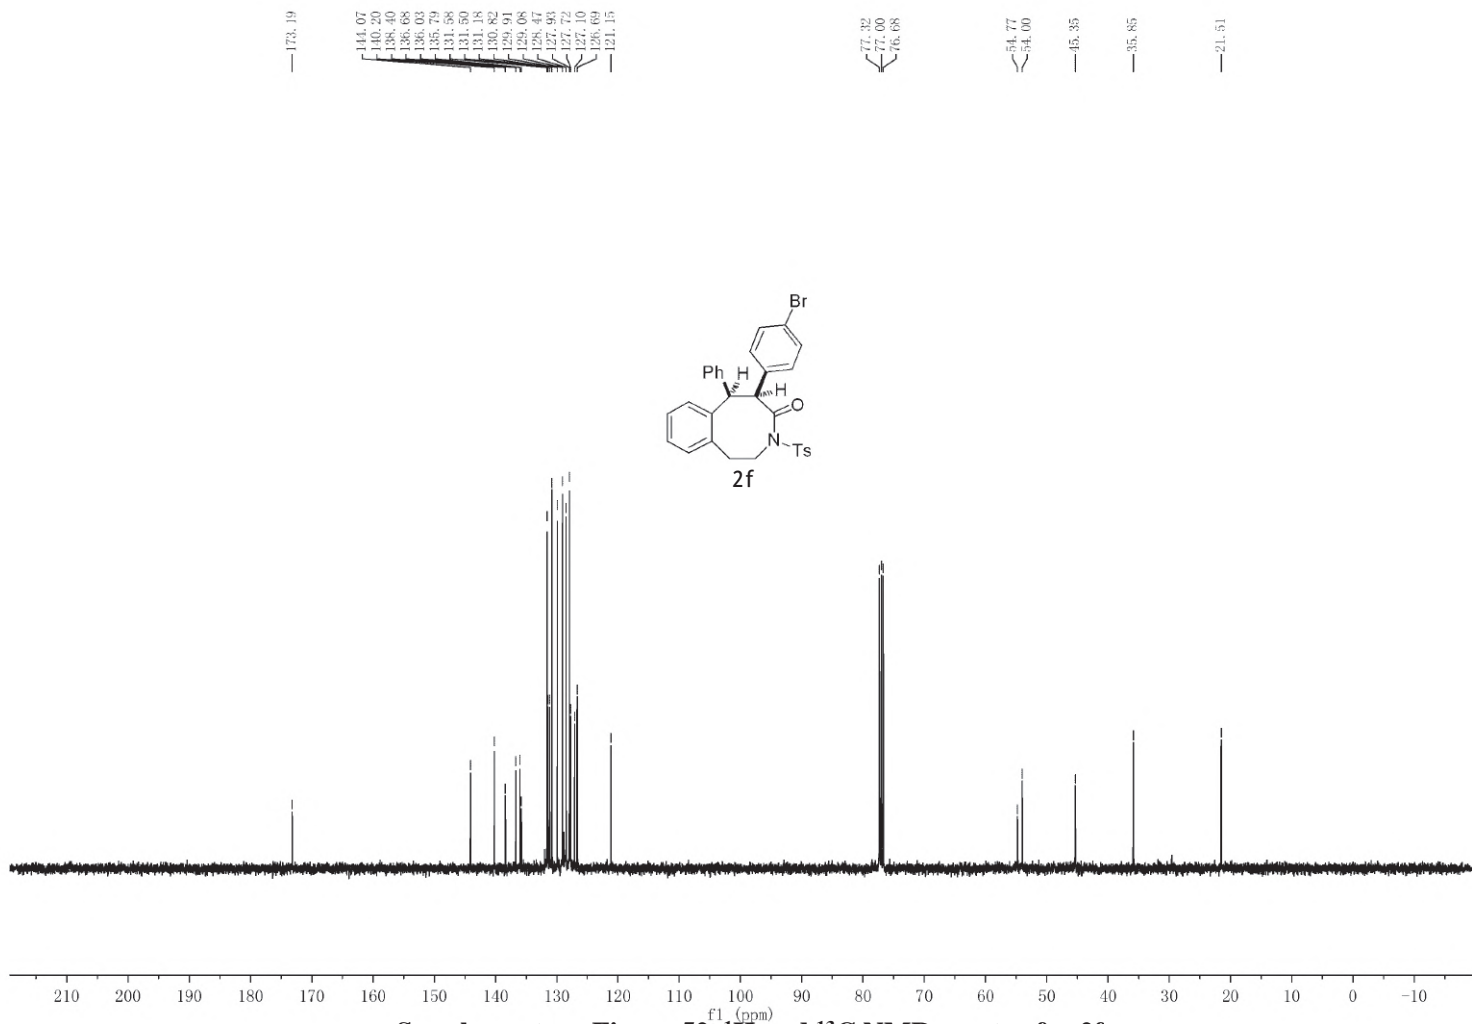

Supplementary Figure 52. <sup>1</sup>H and <sup>13</sup>C NMR spectra for 2f

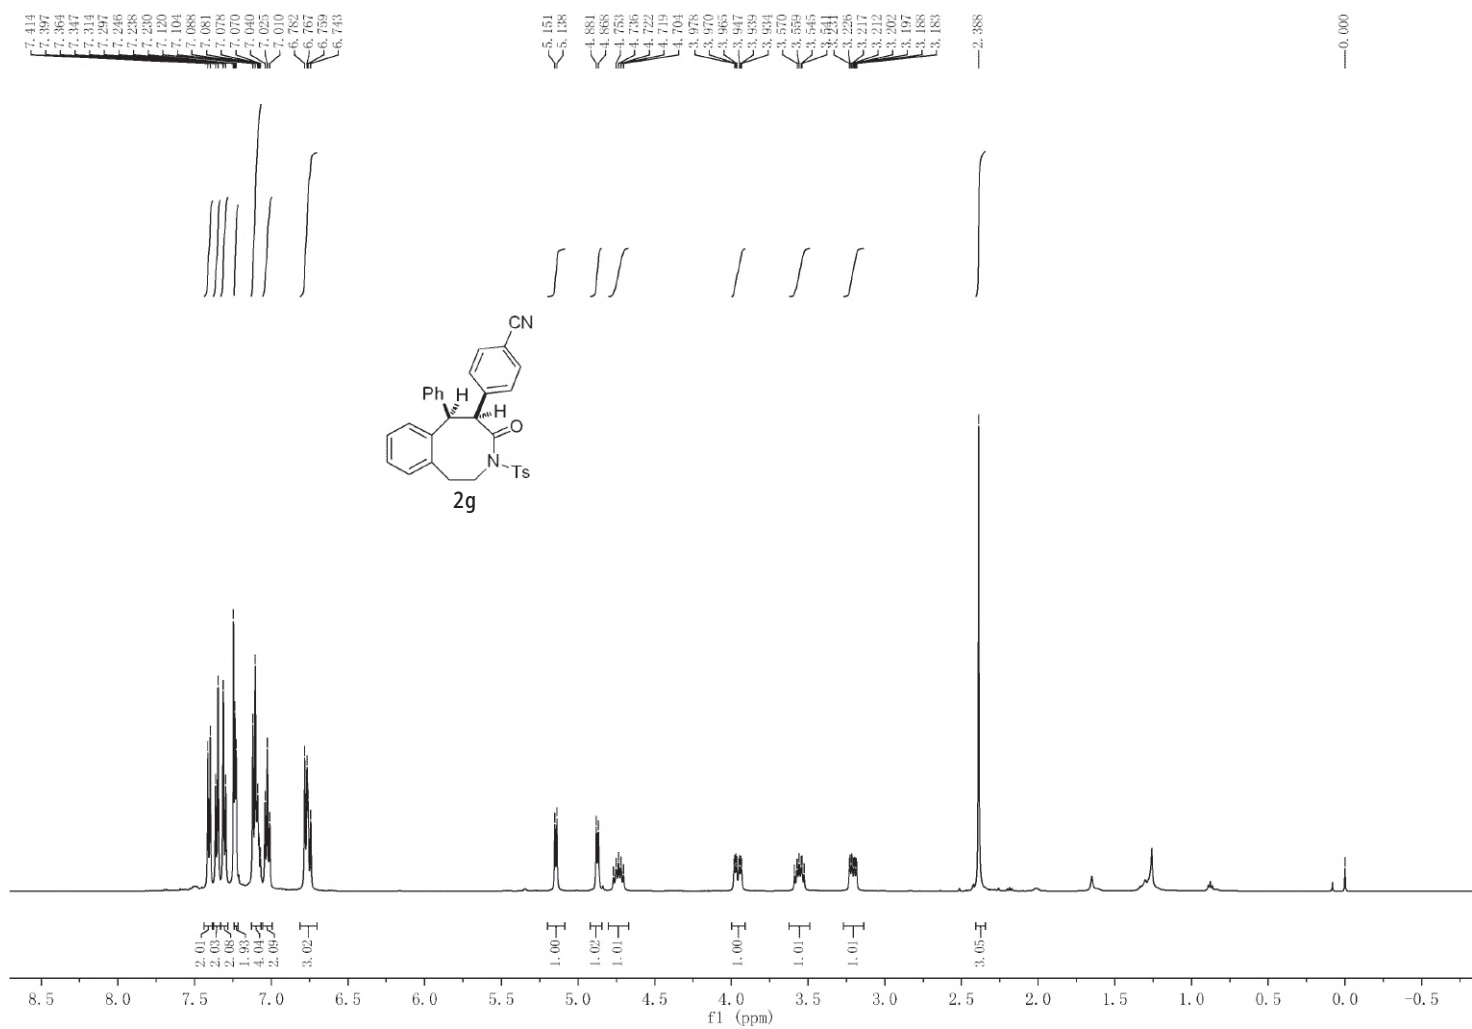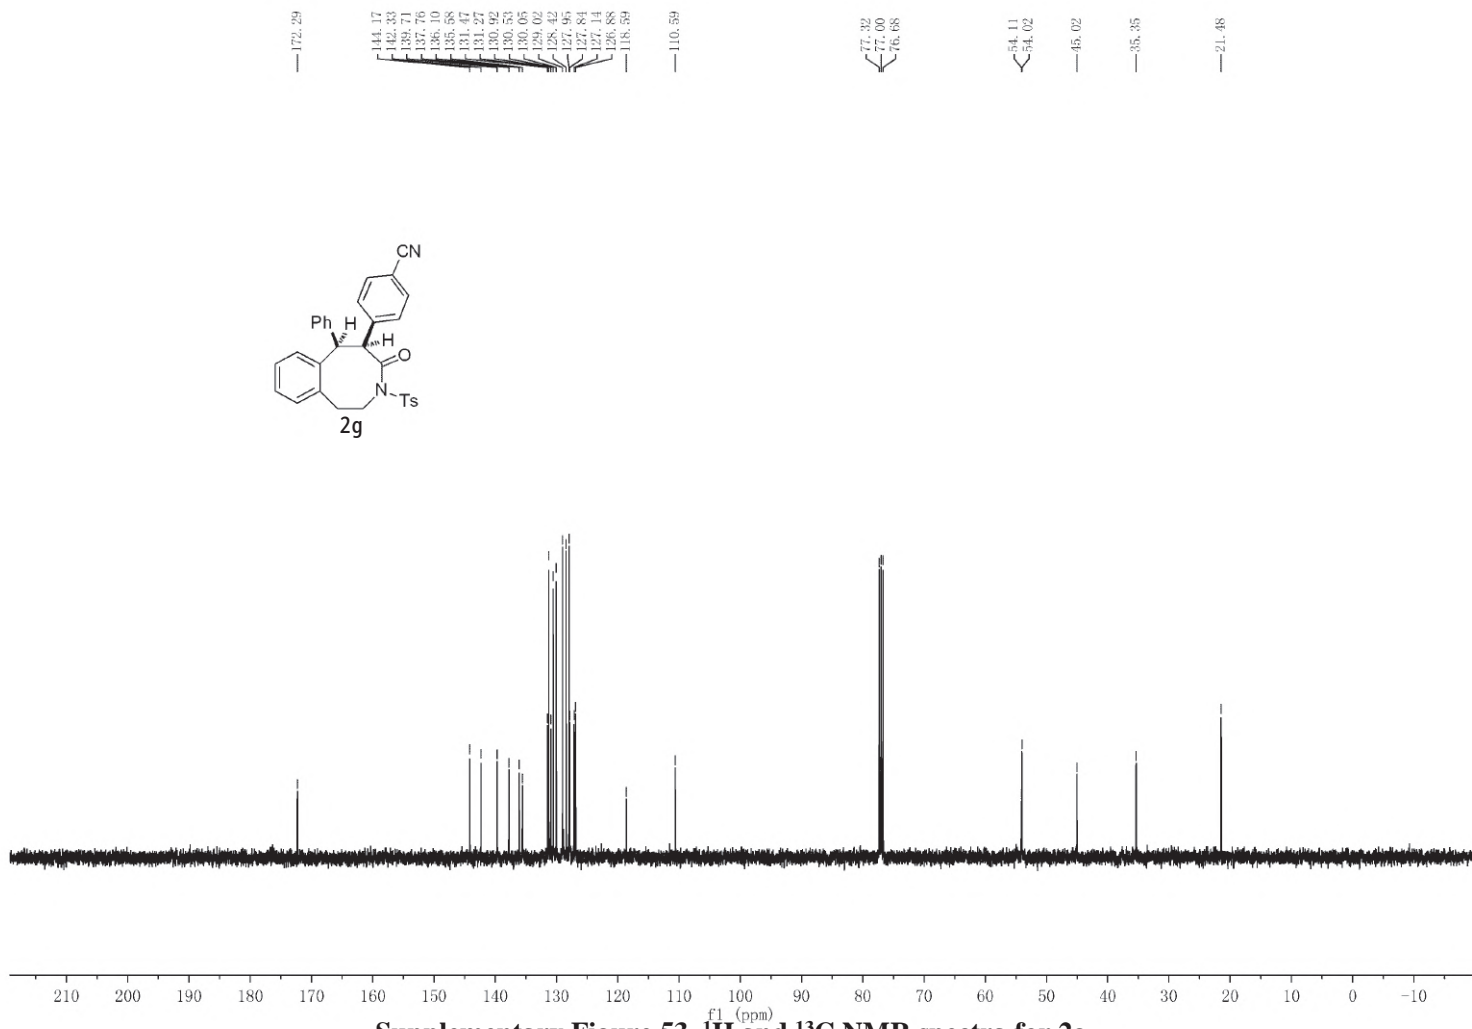

Supplementary Figure 53. <sup>1</sup>H and <sup>13</sup>C NMR spectra for 2g

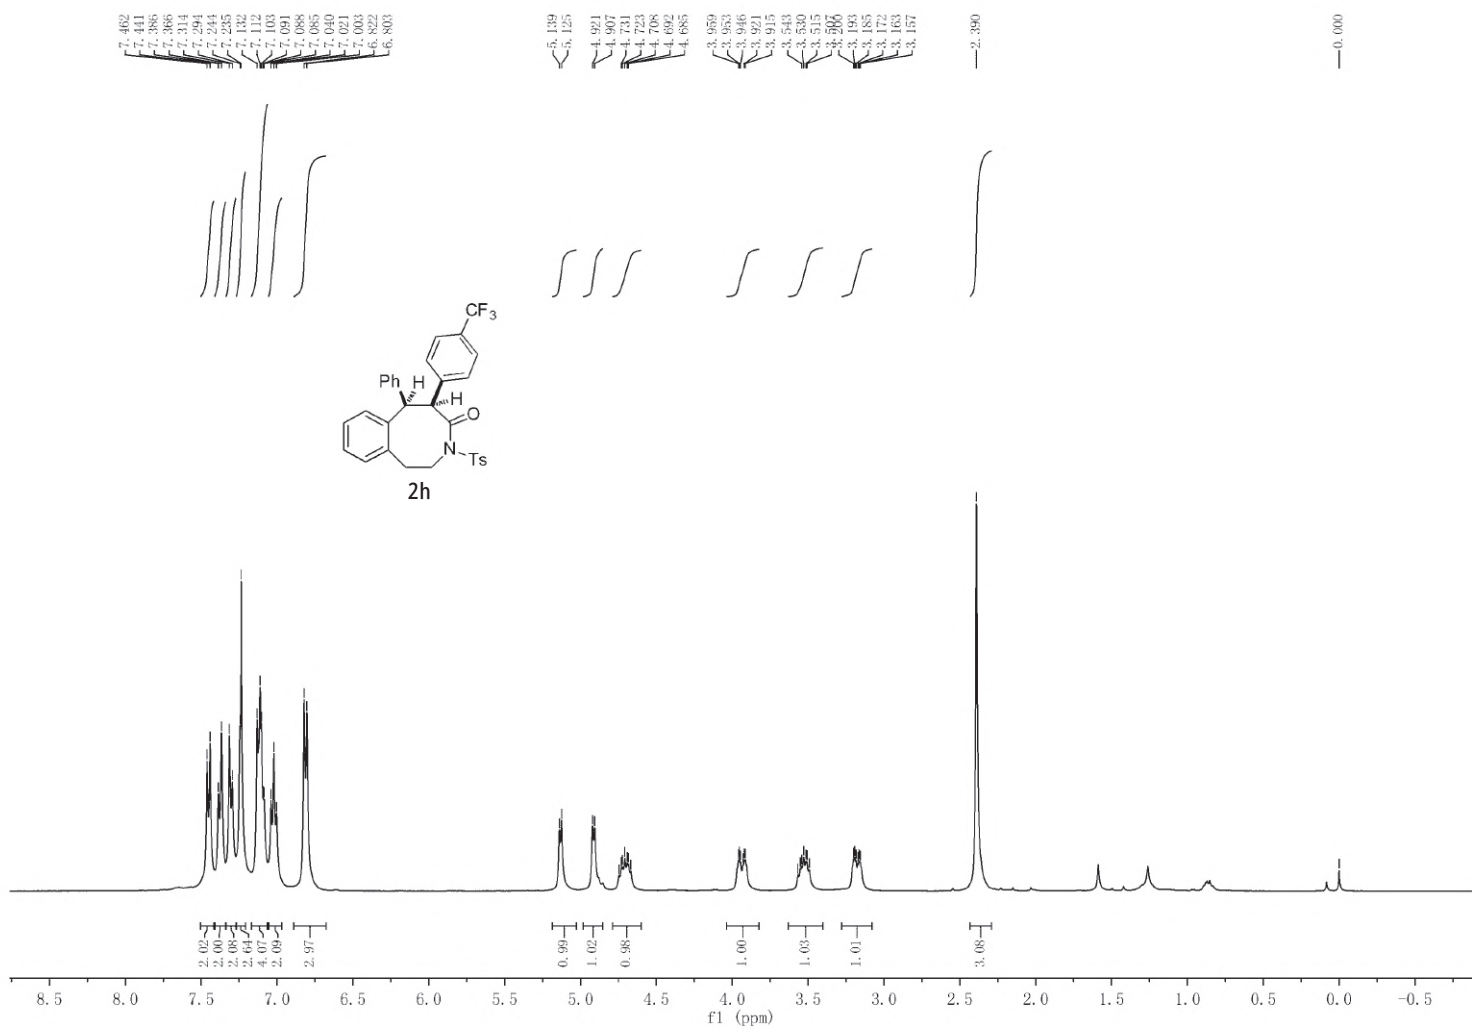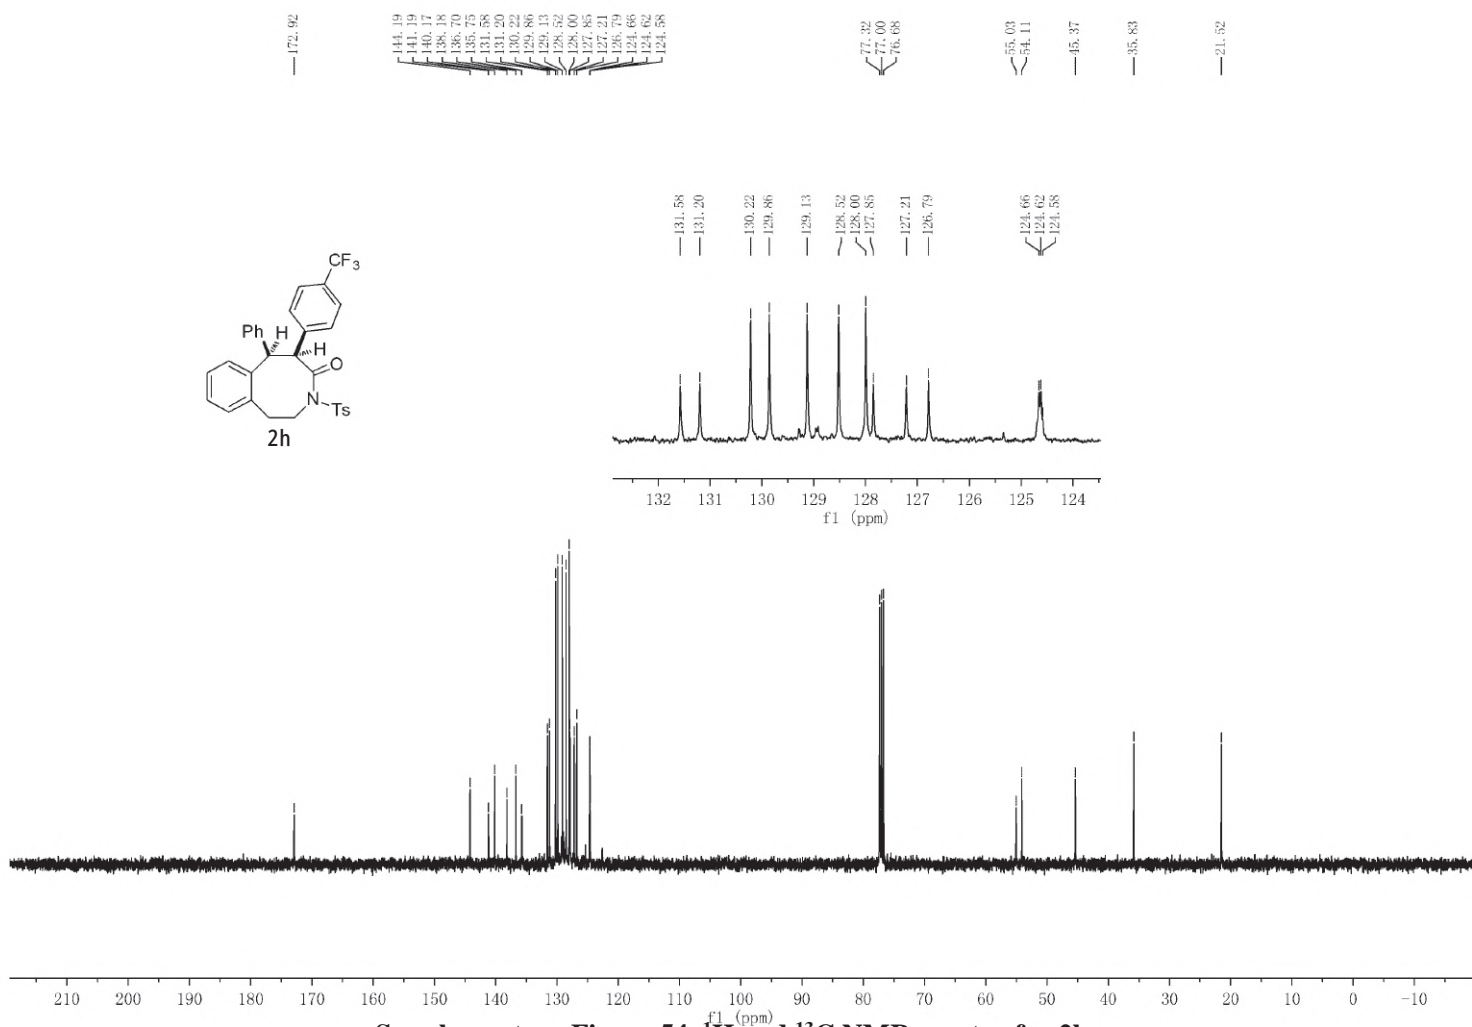

Supplementary Figure 54. <sup>1</sup>H and <sup>13</sup>C NMR spectra for 2h

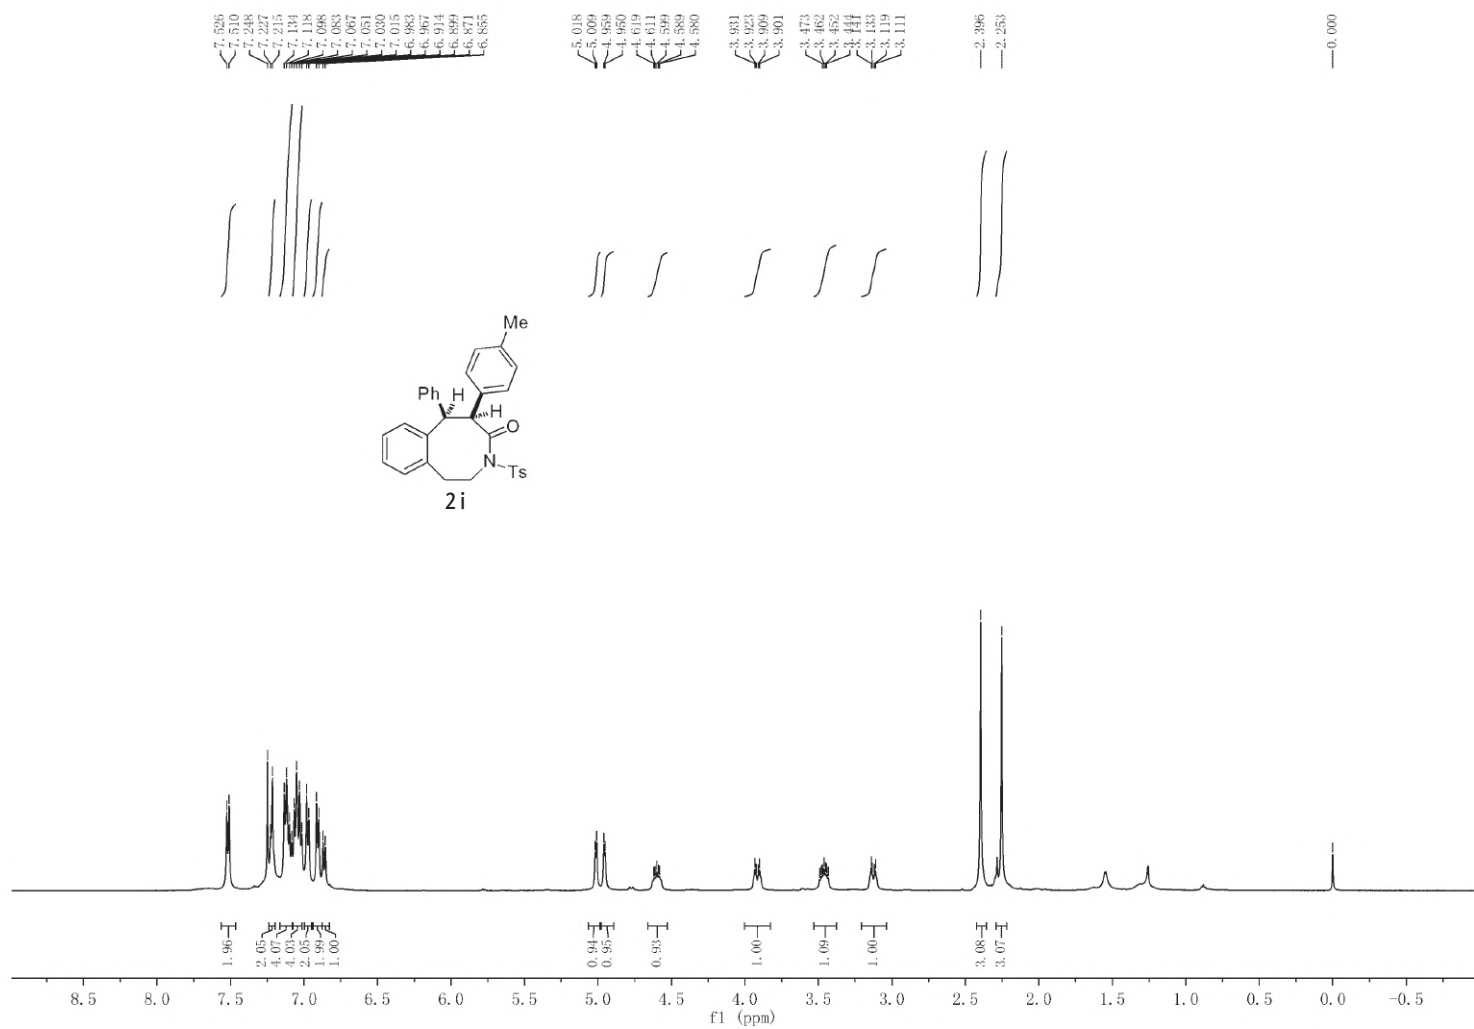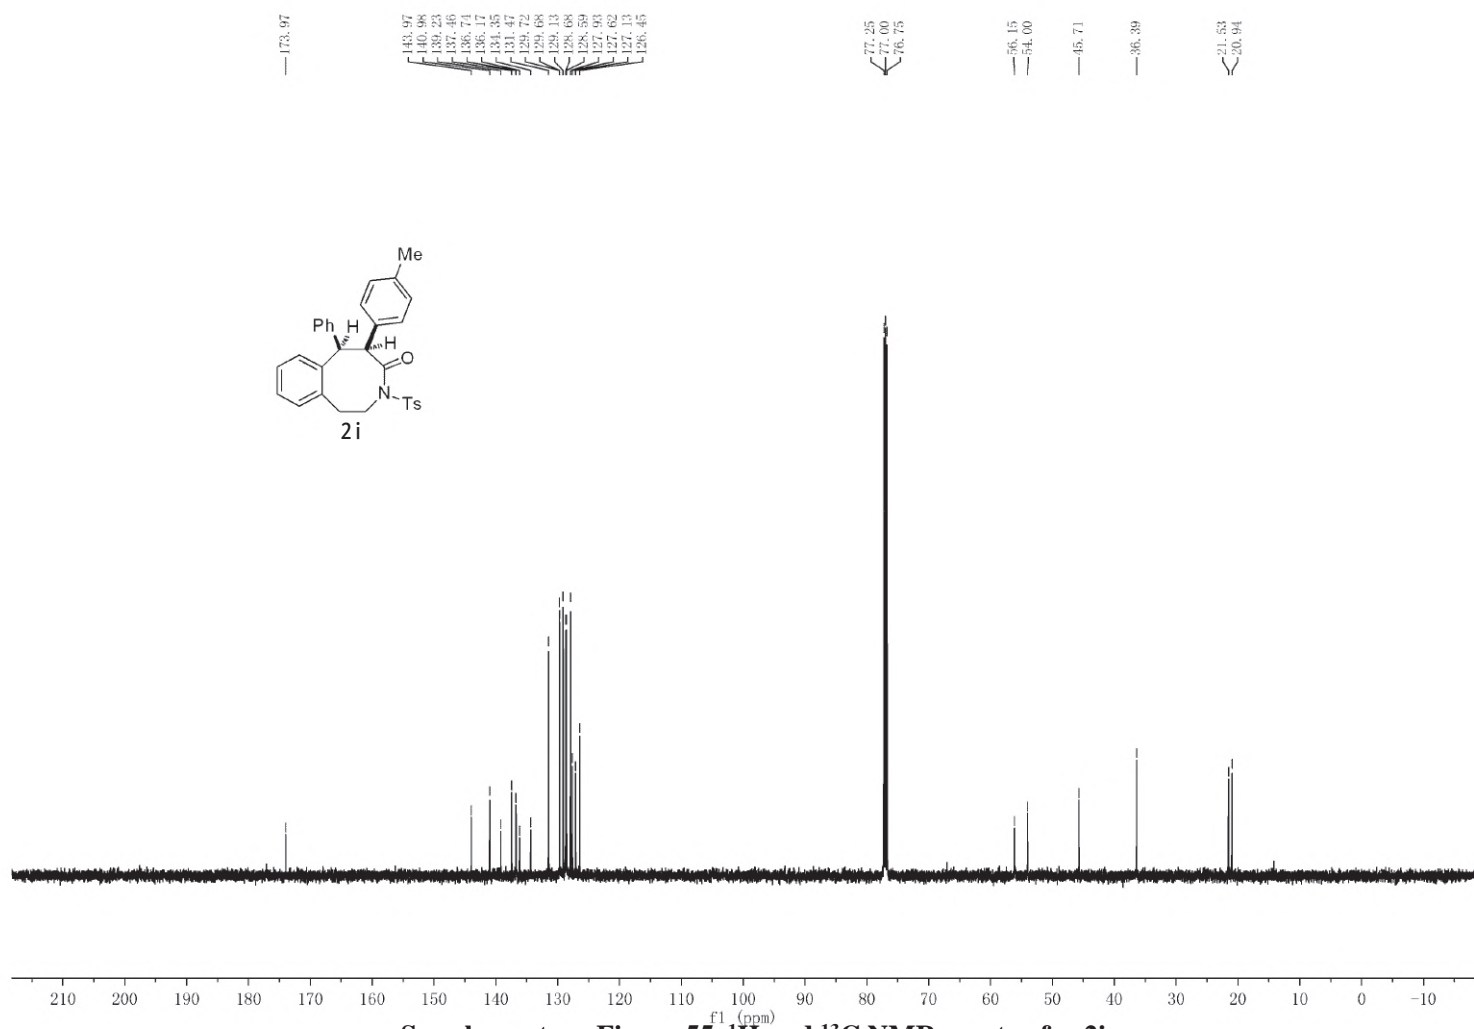

Supplementary Figure 55. <sup>1</sup>H and <sup>13</sup>C NMR spectra for 2i



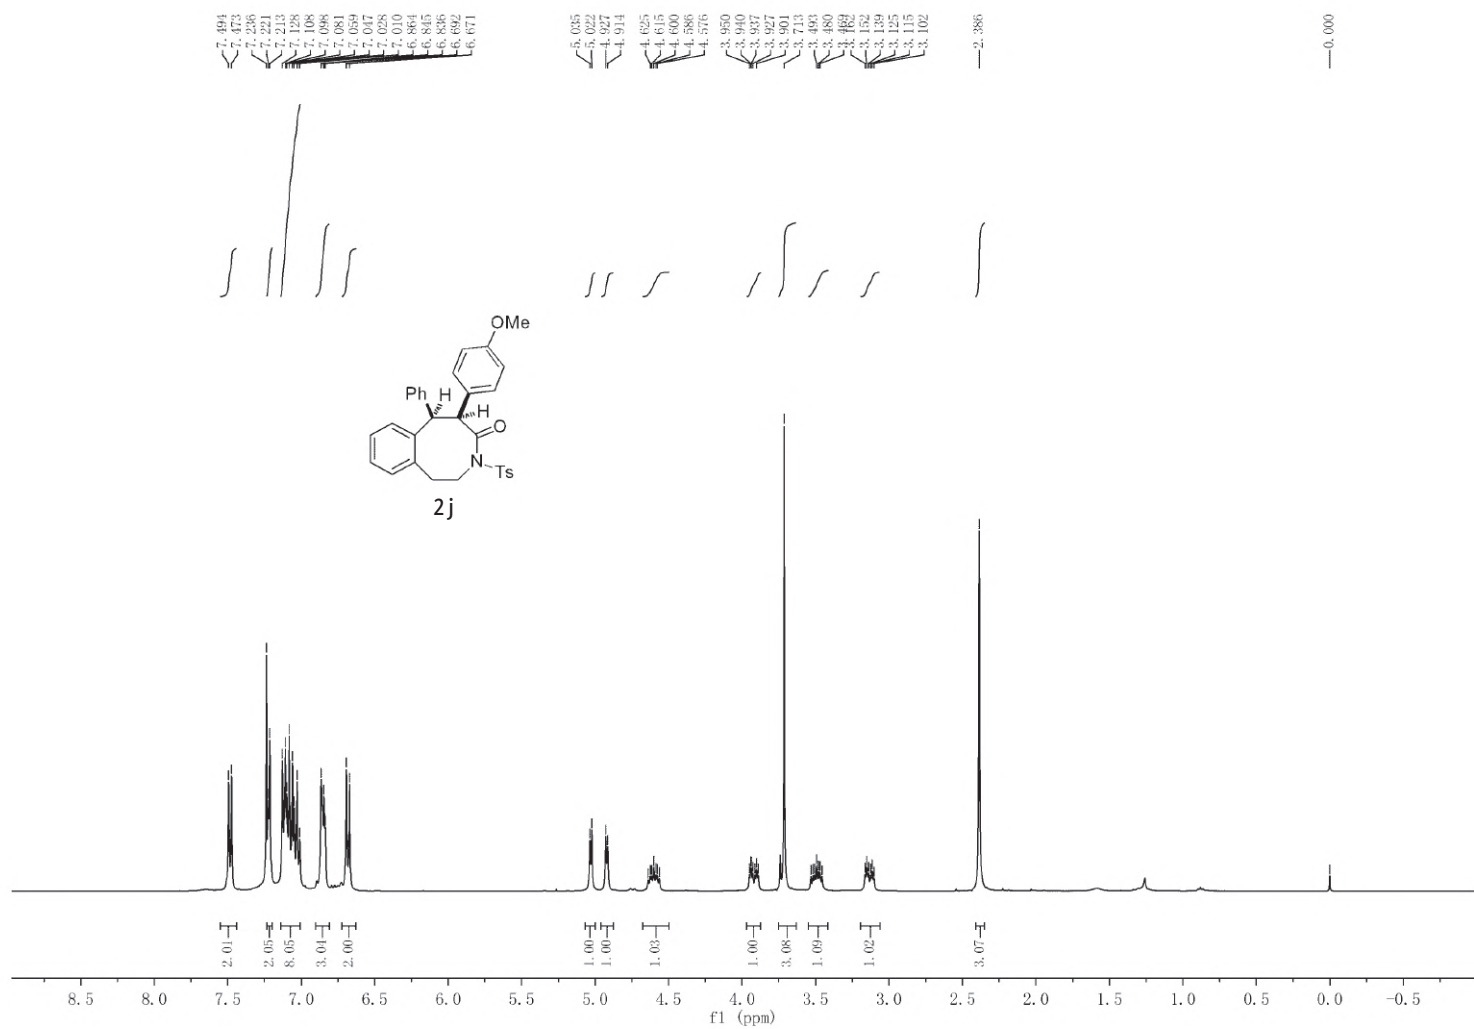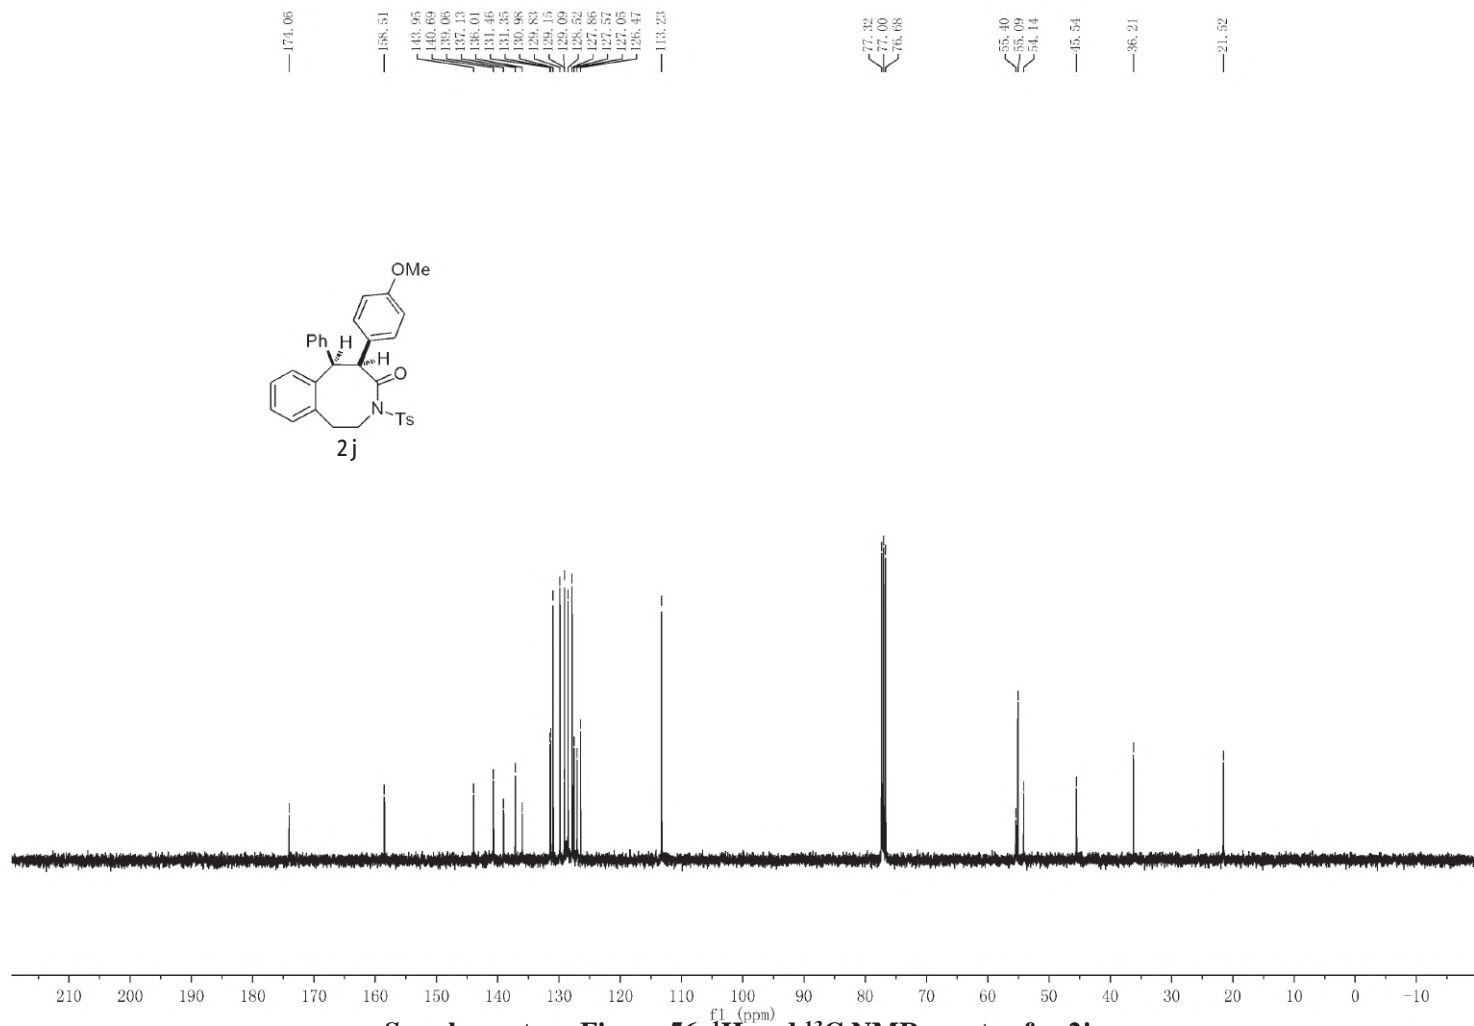

Supplementary Figure 56. <sup>1</sup>H and <sup>13</sup>C NMR spectra for **2j**

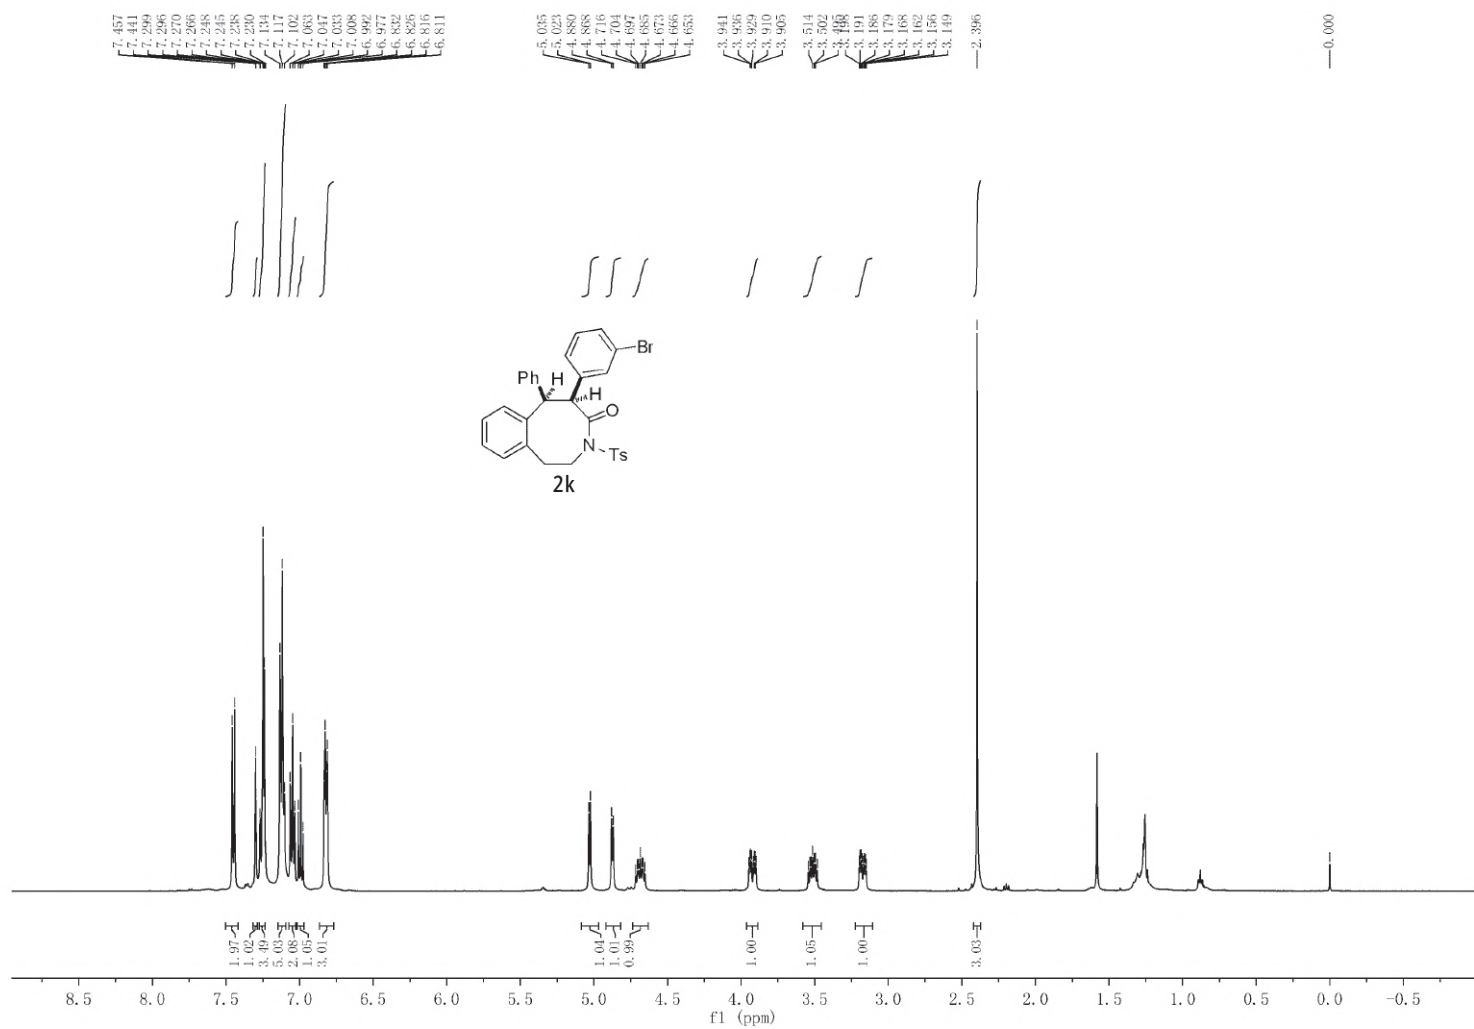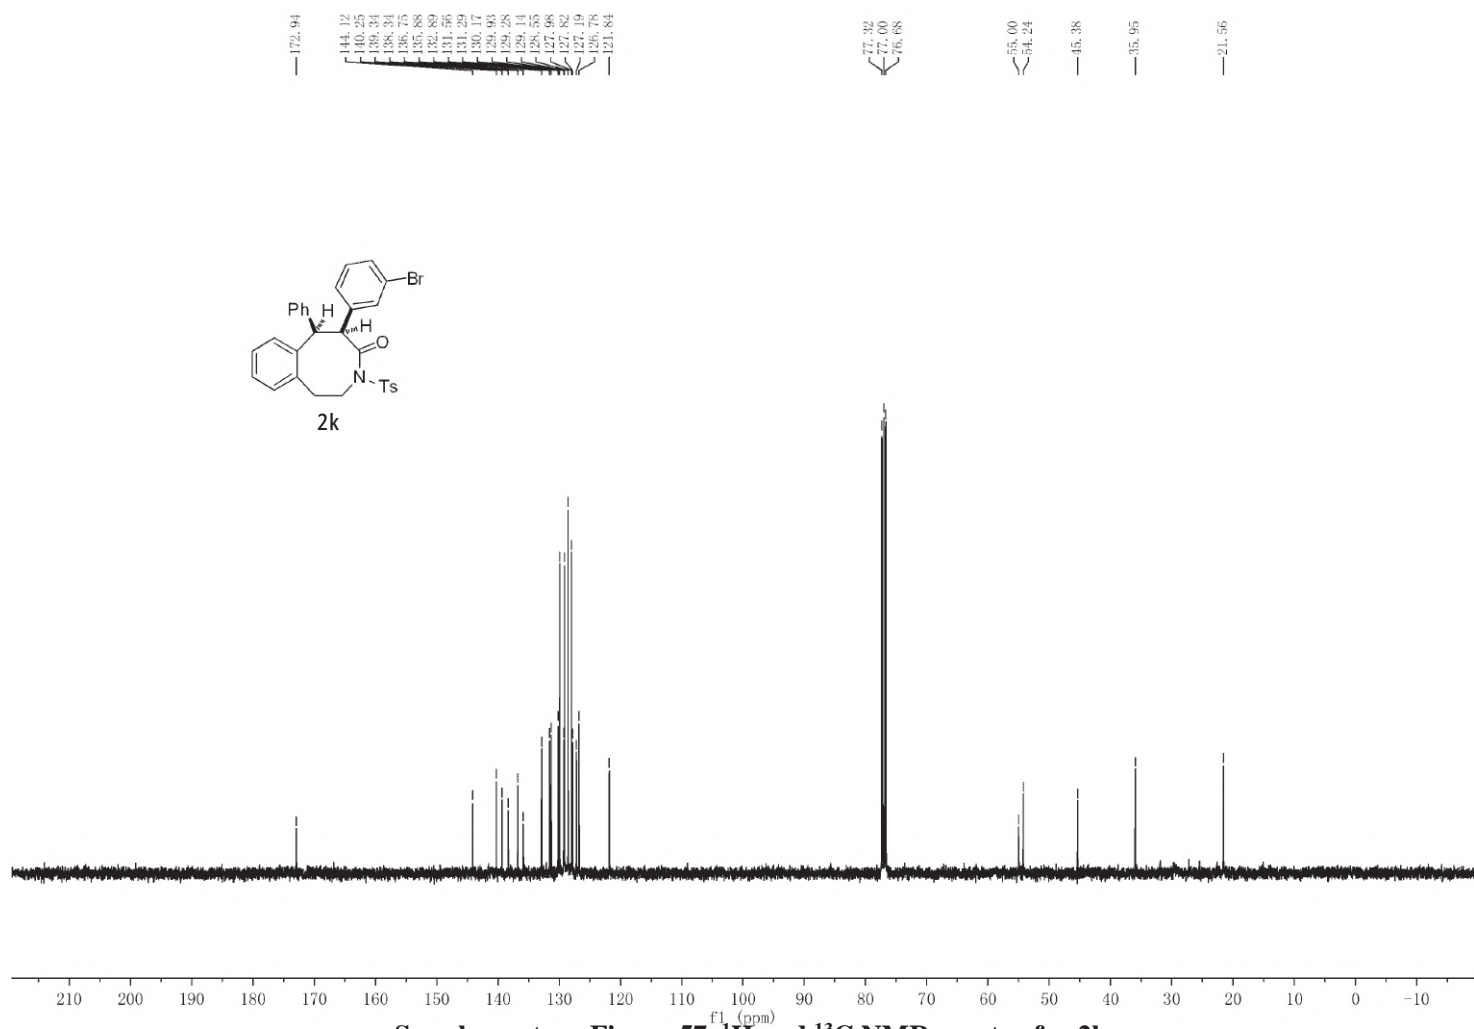

Supplementary Figure 57. <sup>1</sup>H and <sup>13</sup>C NMR spectra for 2k

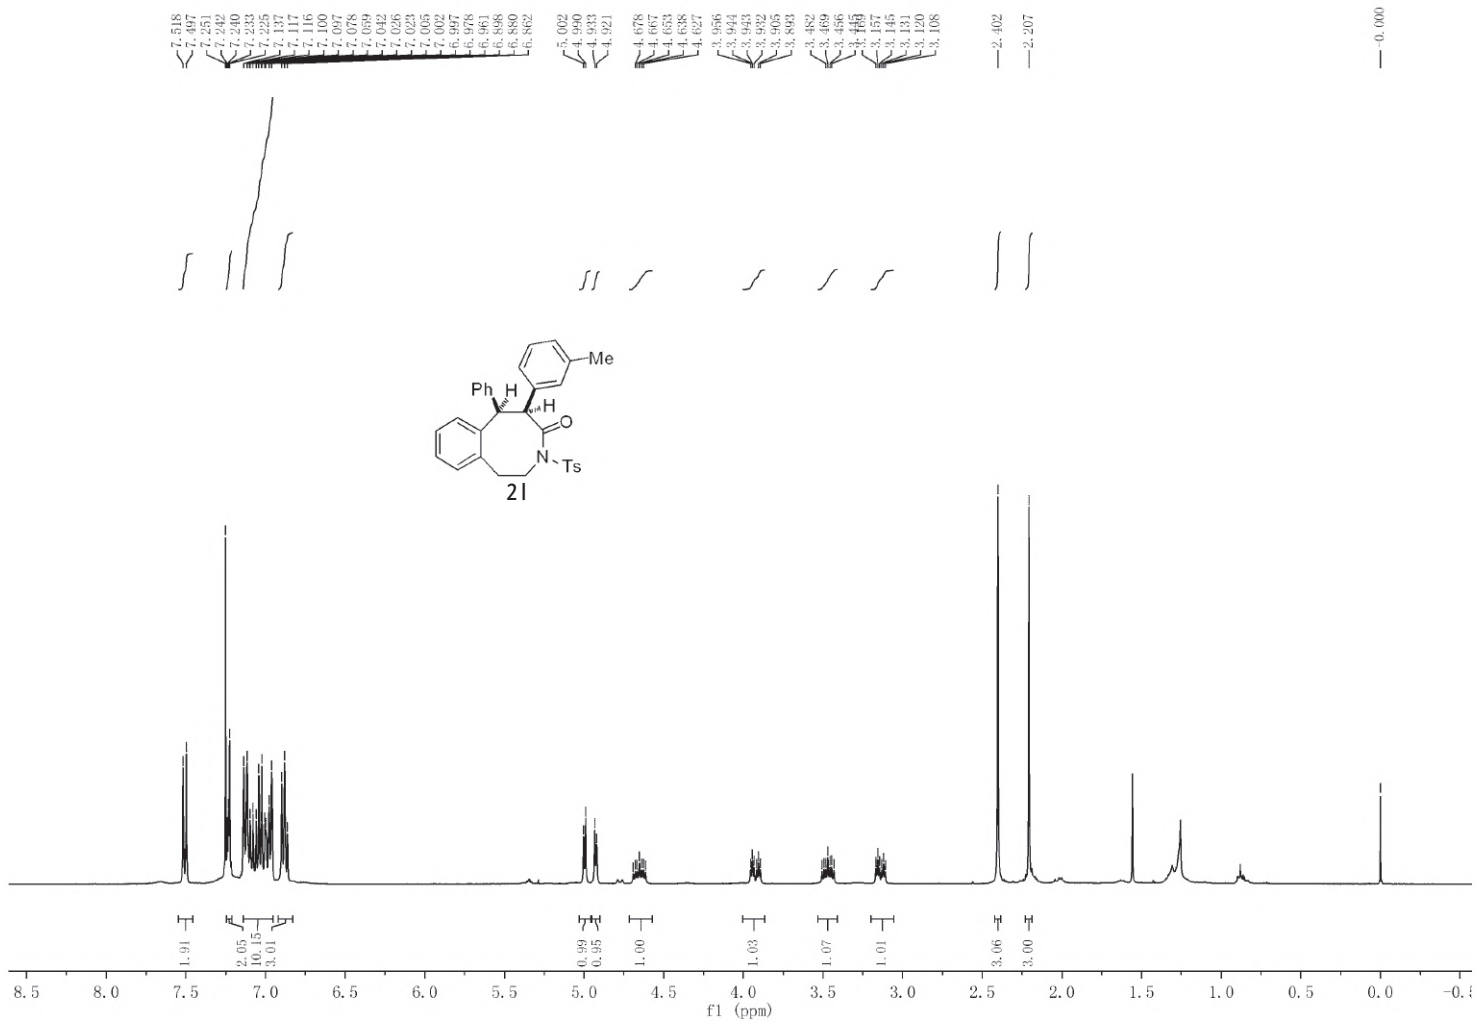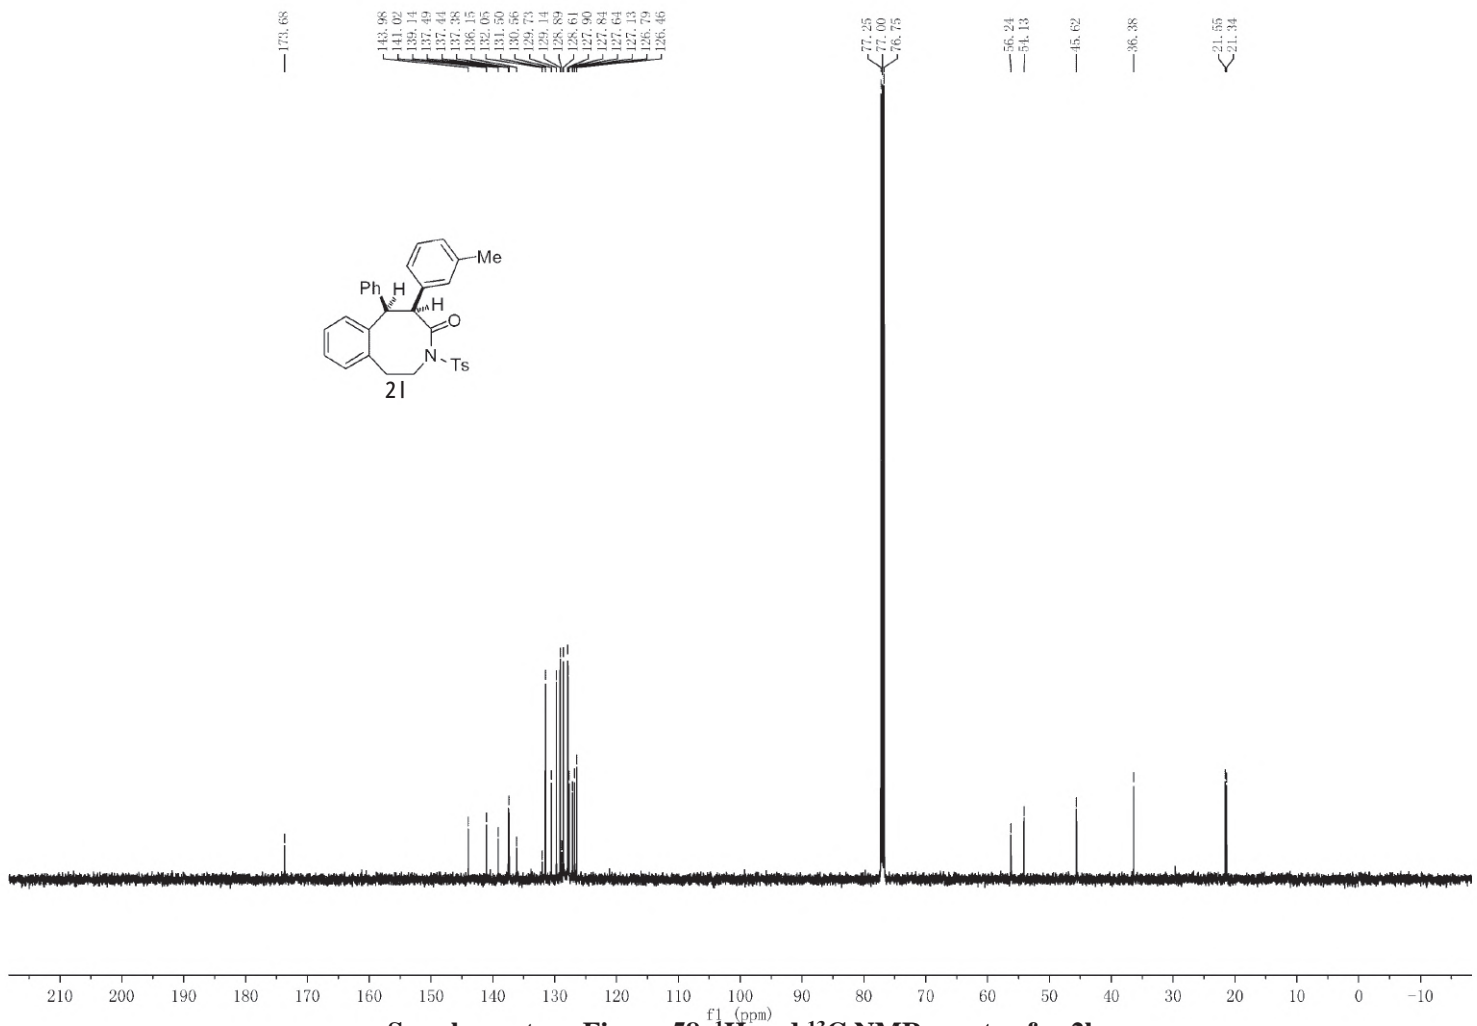

Supplementary Figure 58. <sup>1</sup>H and <sup>13</sup>C NMR spectra for 21

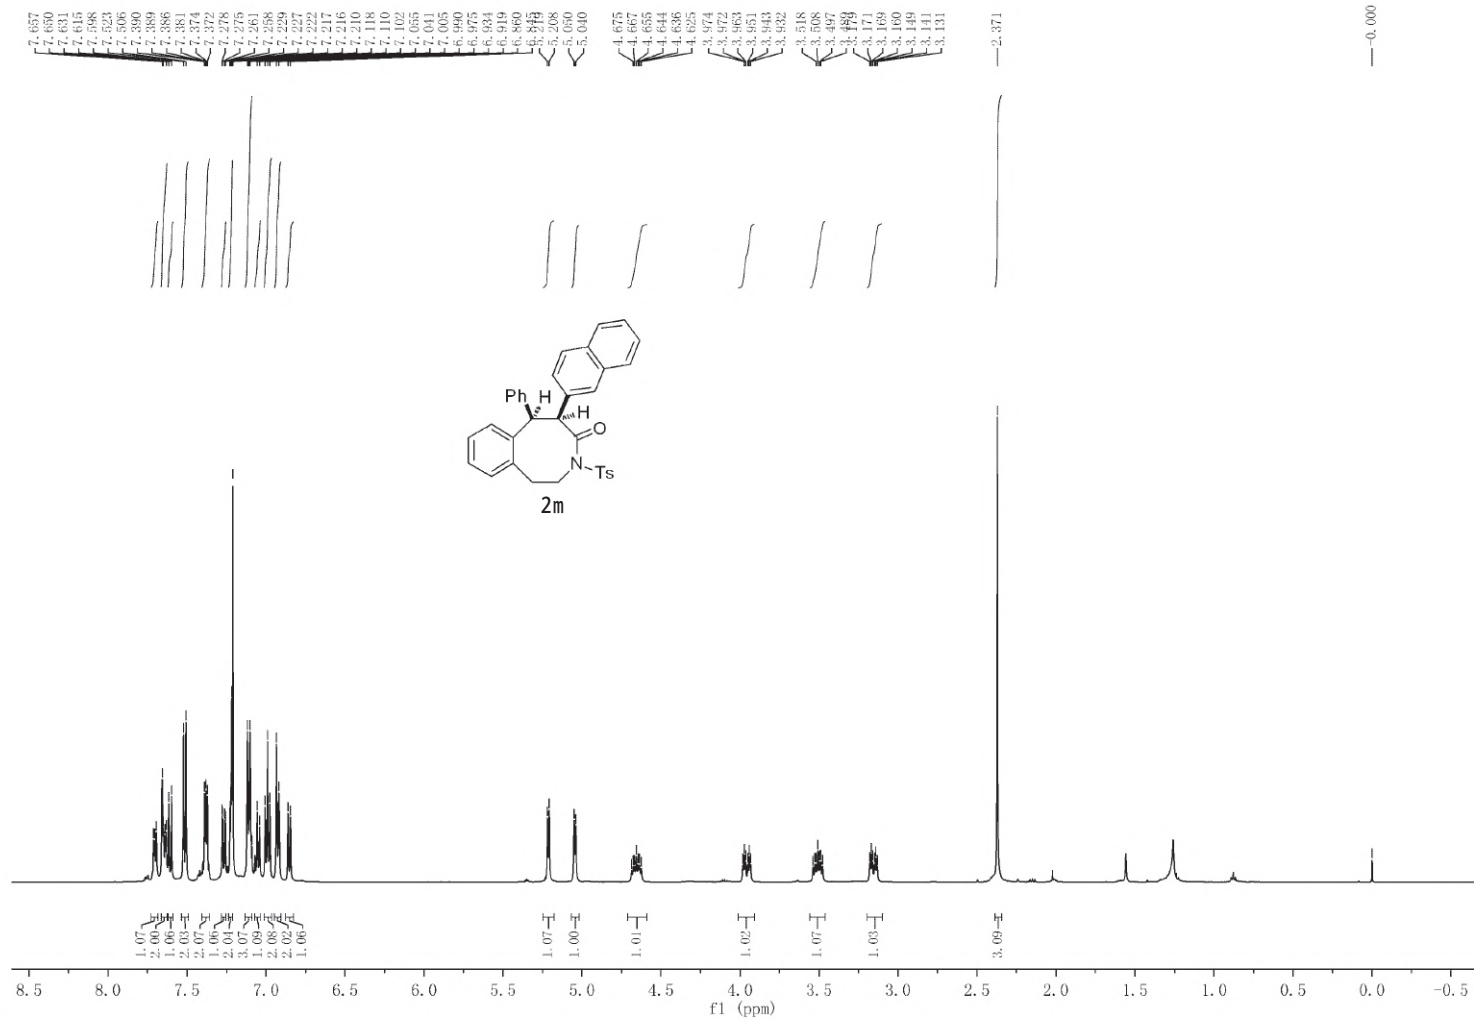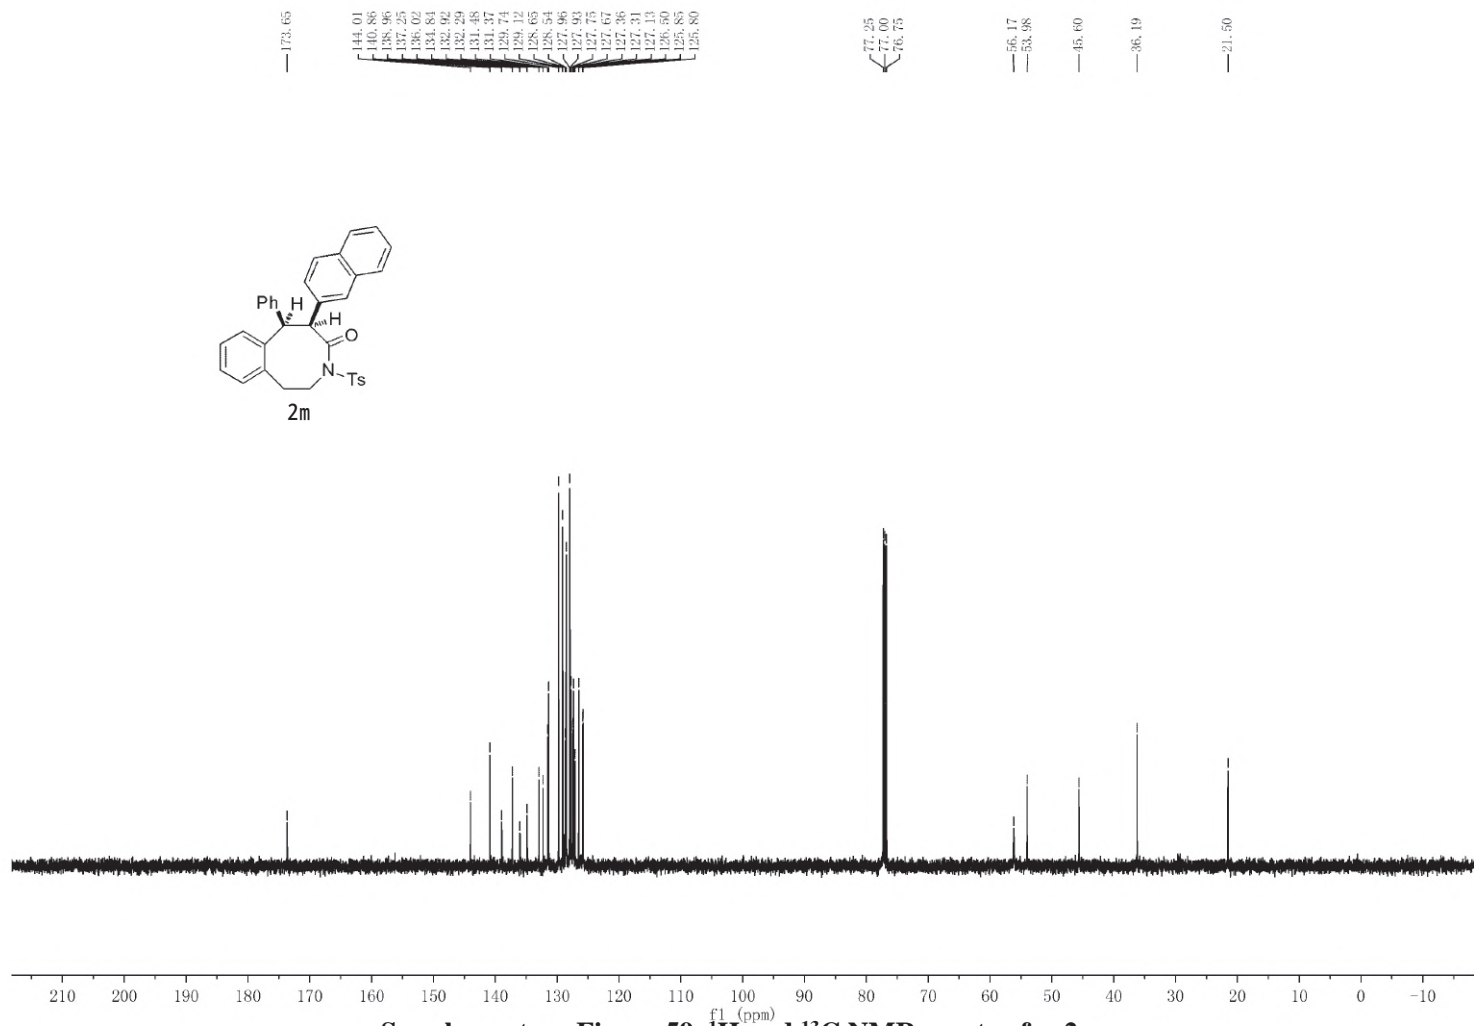

Supplementary Figure 59. <sup>1</sup>H and <sup>13</sup>C NMR spectra for 2m

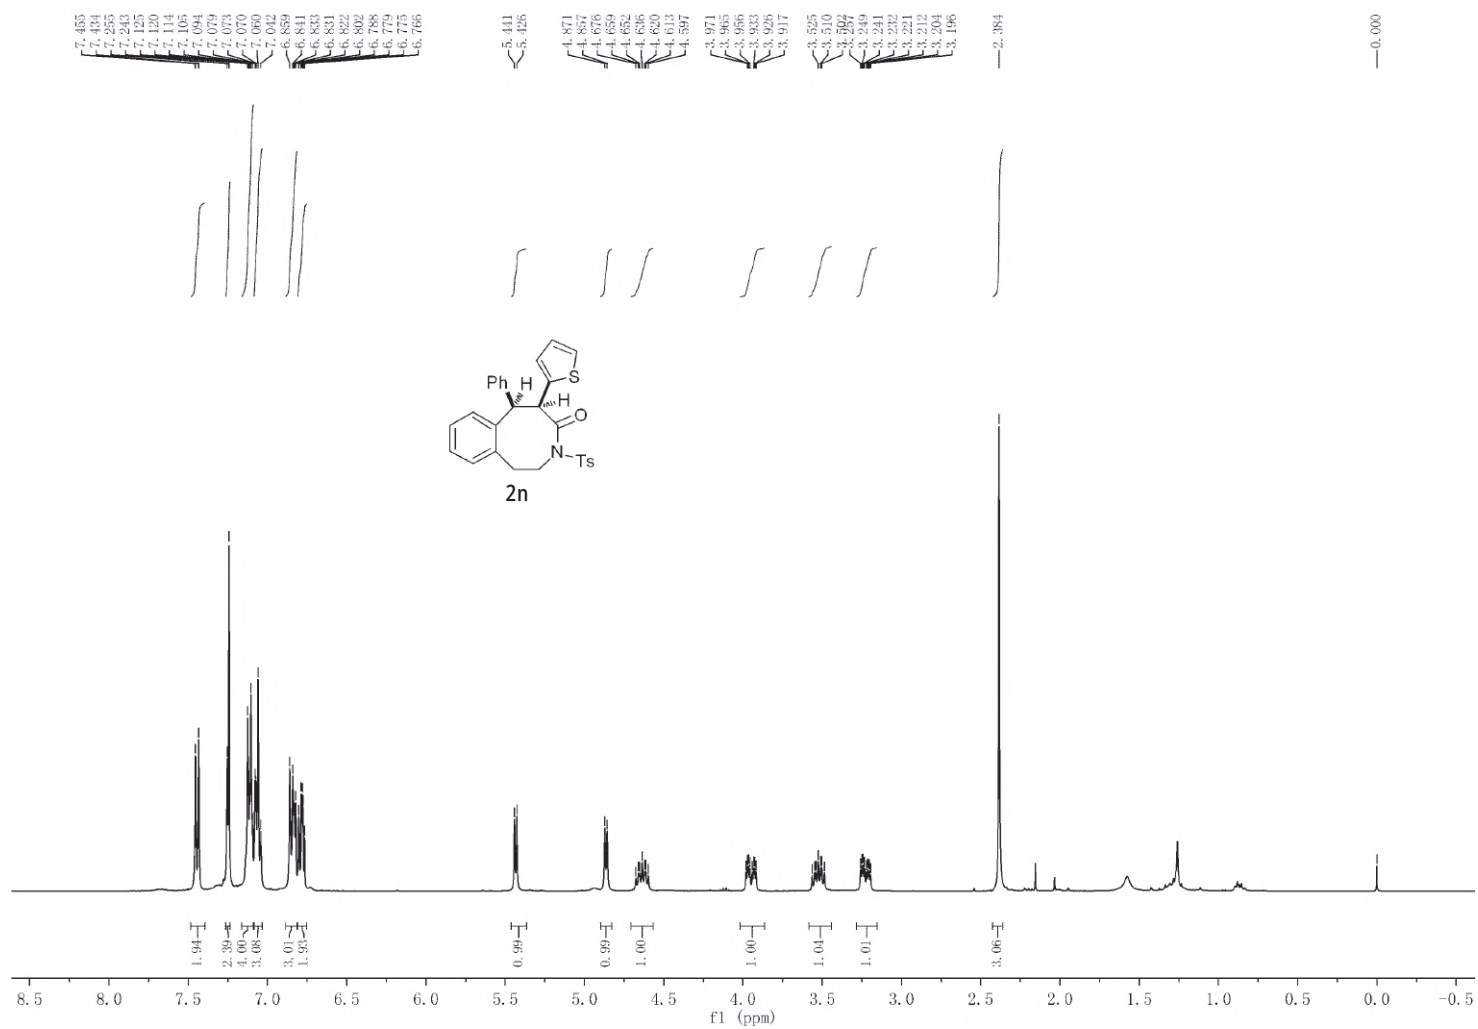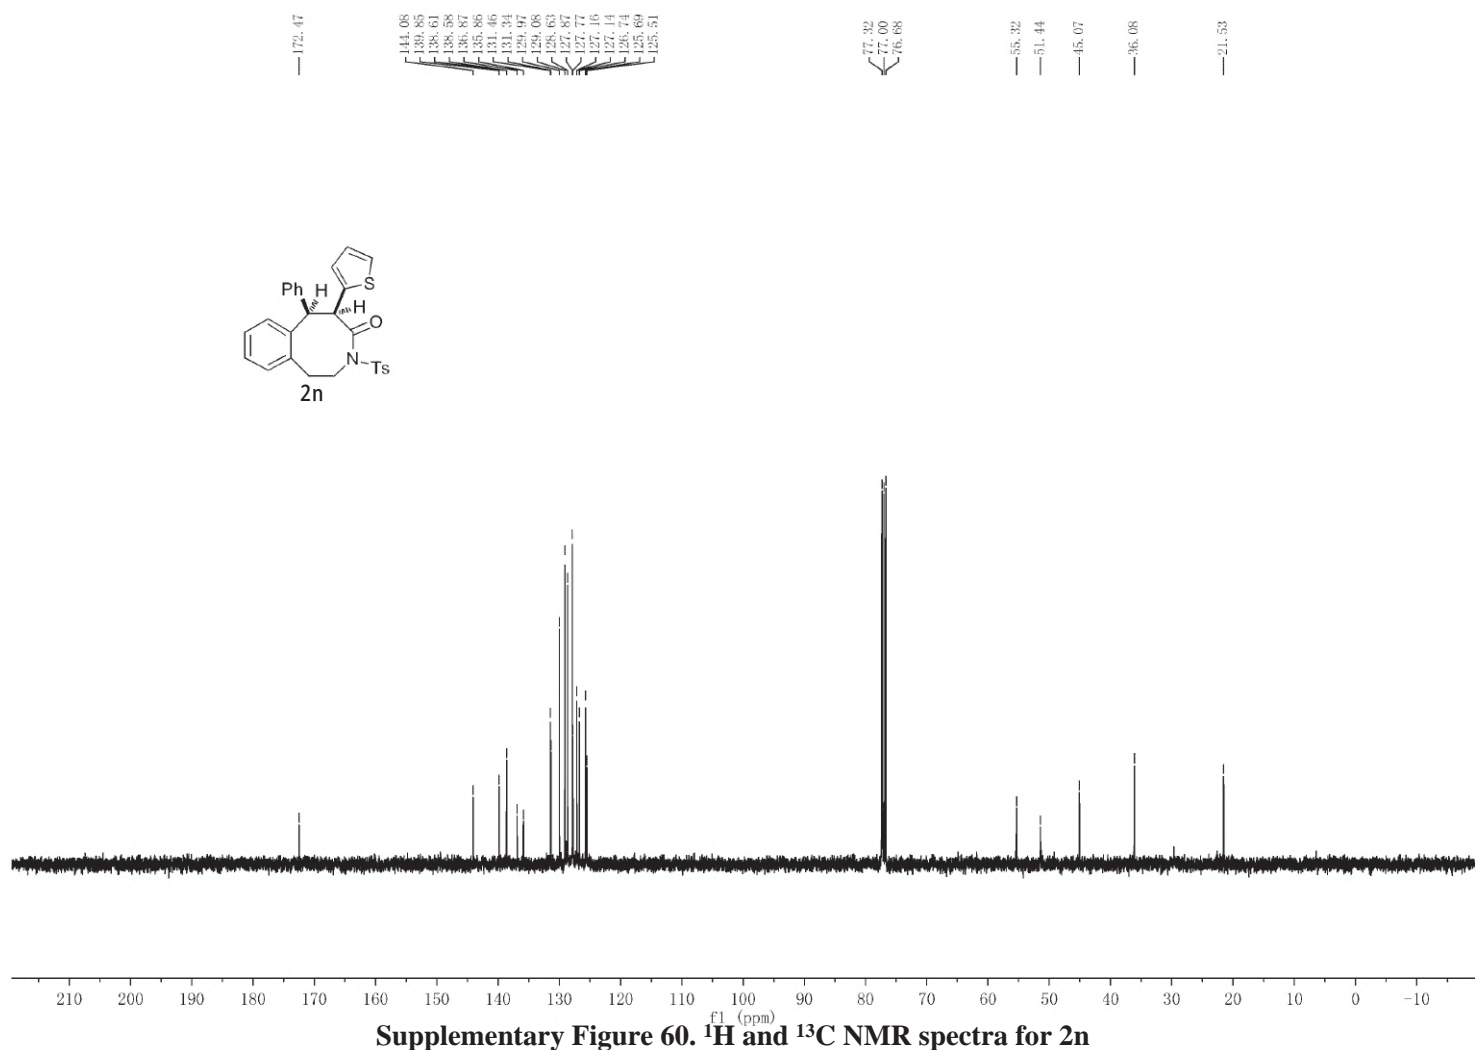

Supplementary Figure 60. <sup>1</sup>H and <sup>13</sup>C NMR spectra for 2n

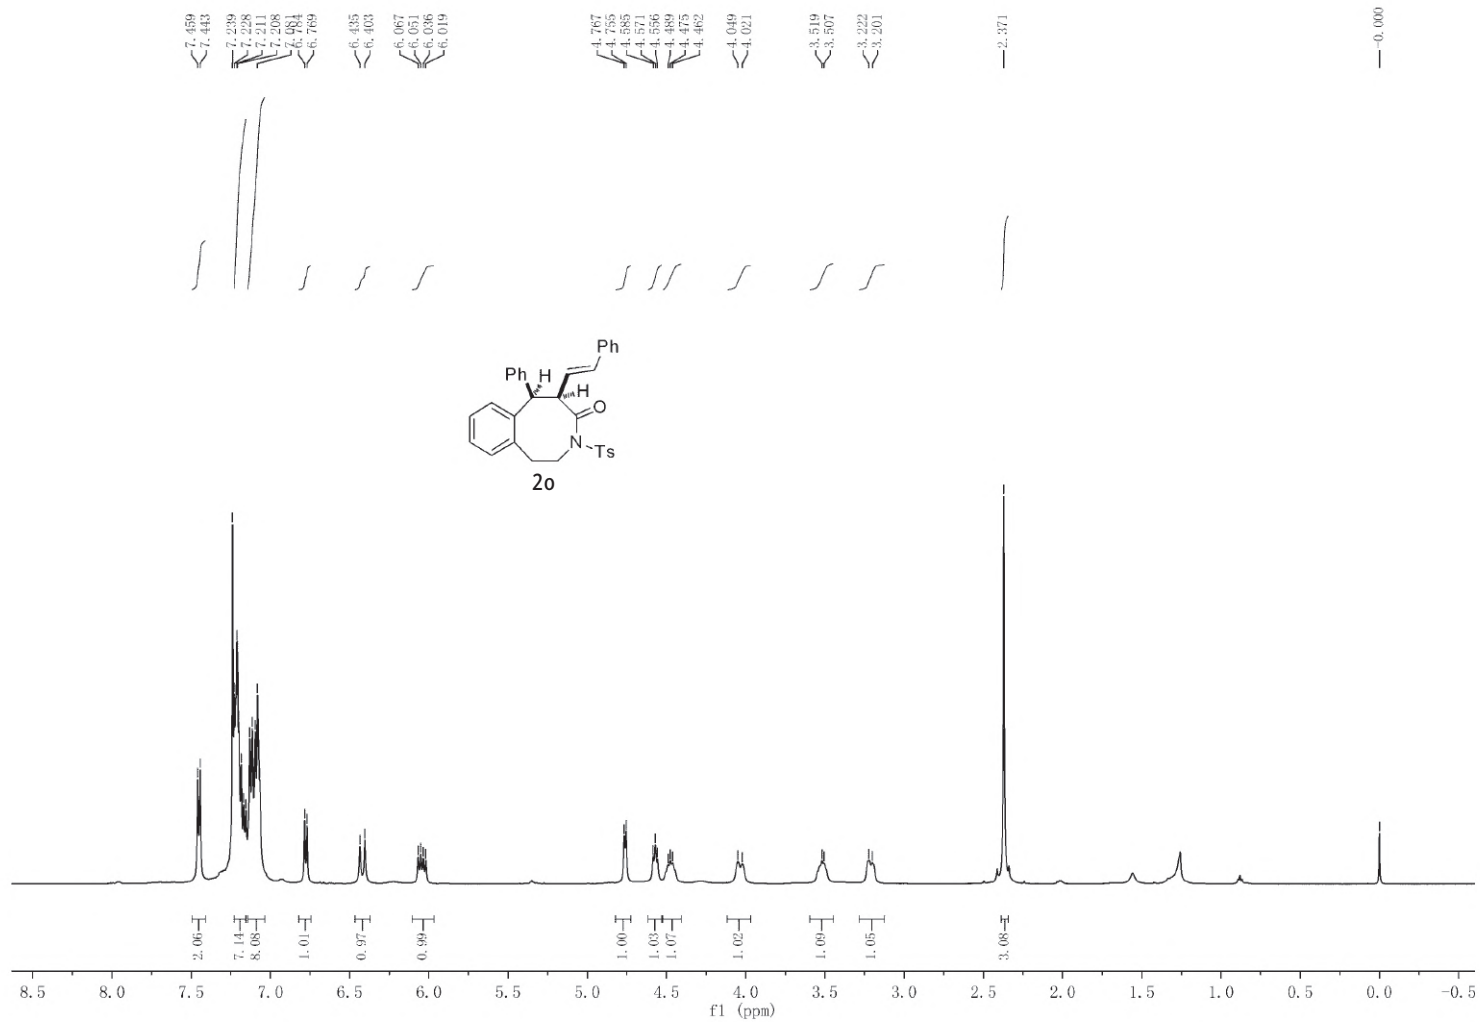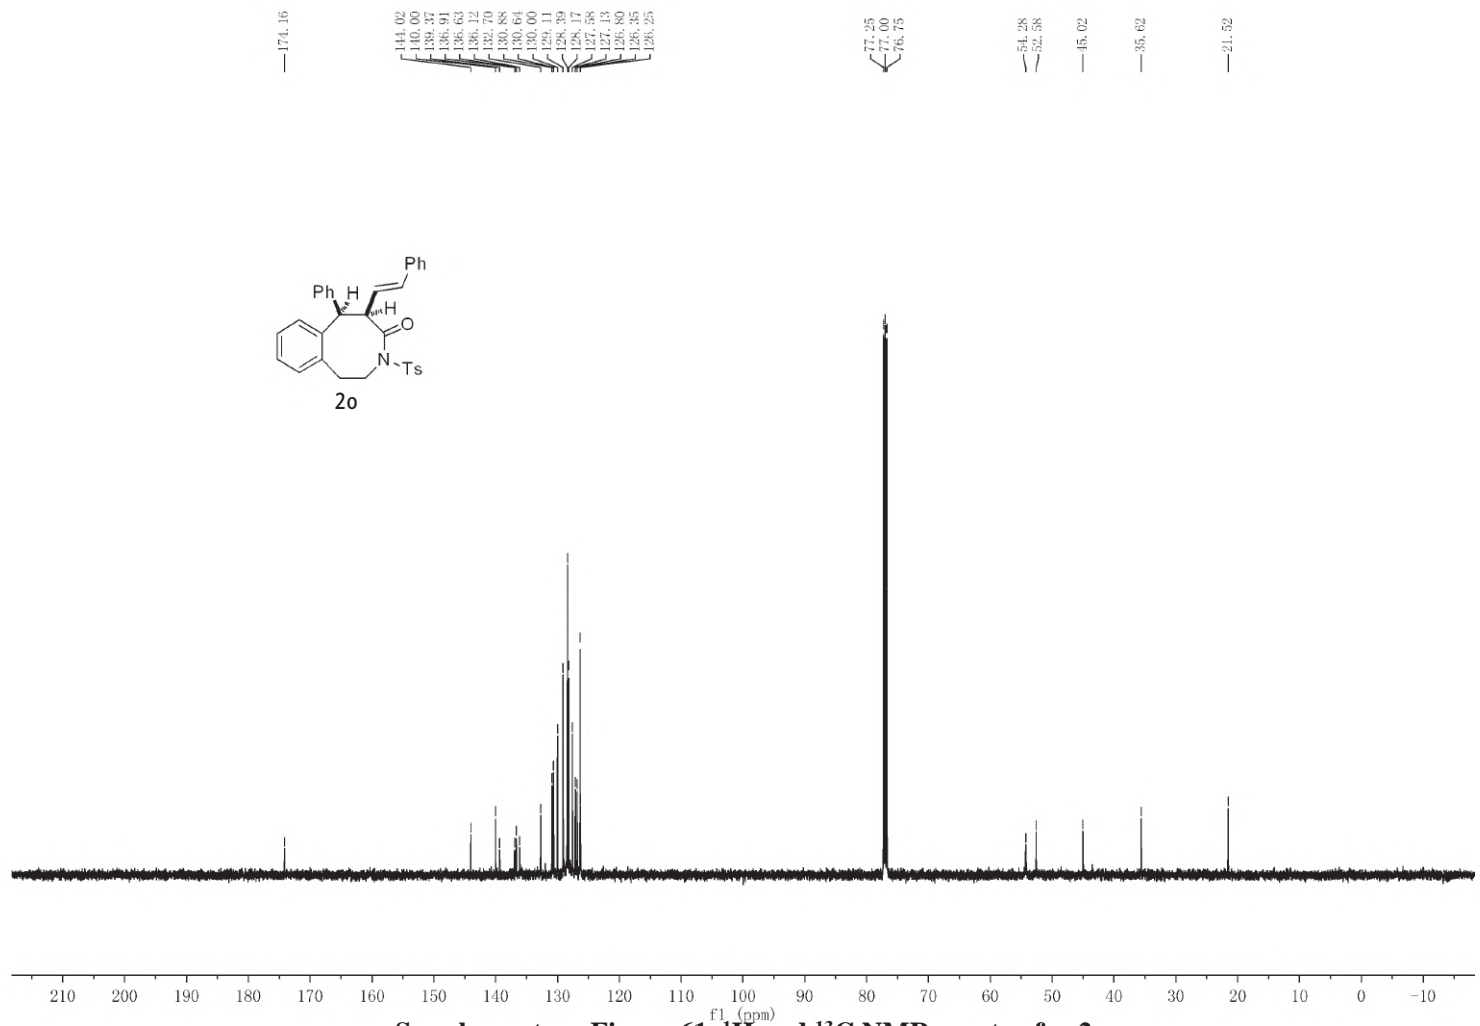

Supplementary Figure 61. <sup>1</sup>H and <sup>13</sup>C NMR spectra for **20**

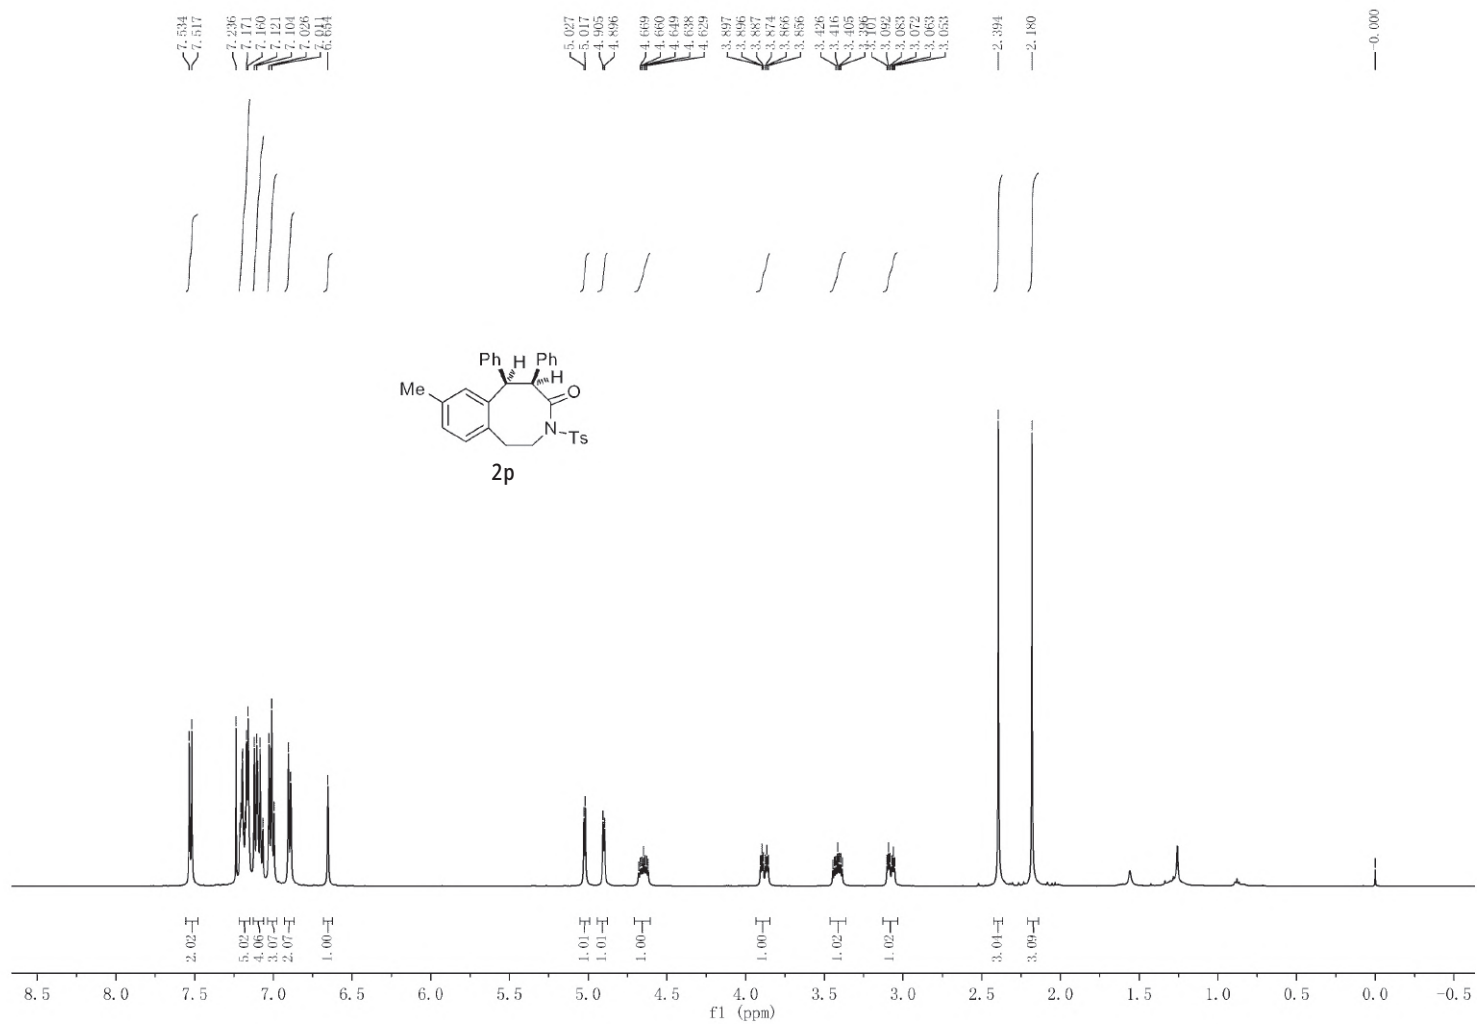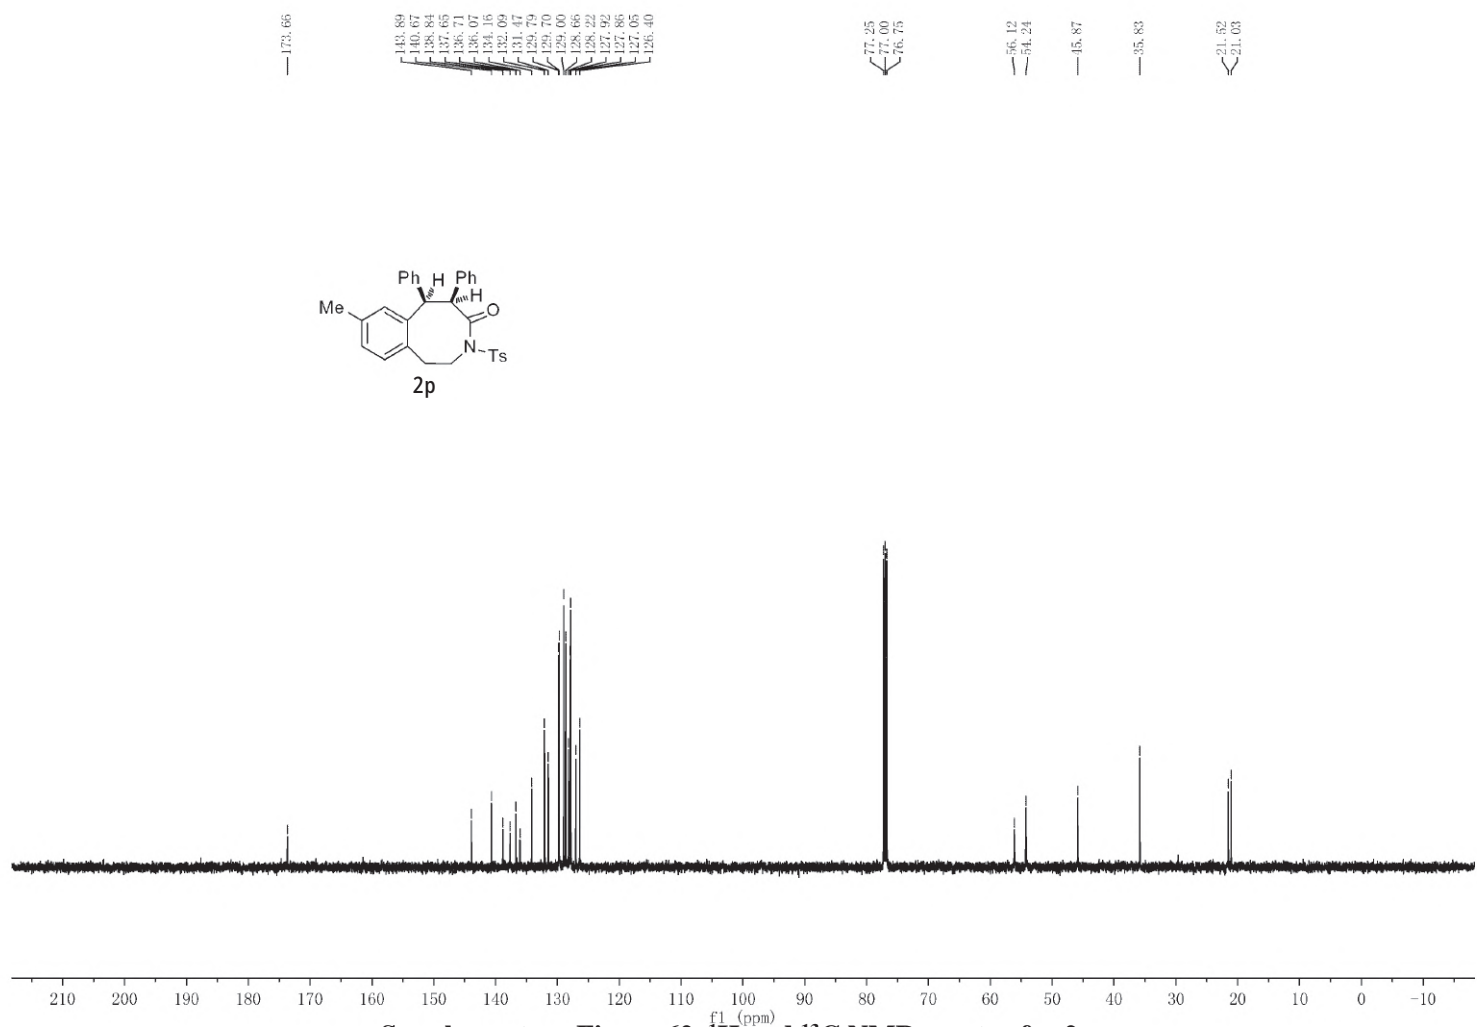

Supplementary Figure 62. <sup>1</sup>H and <sup>13</sup>C NMR spectra for **2p**

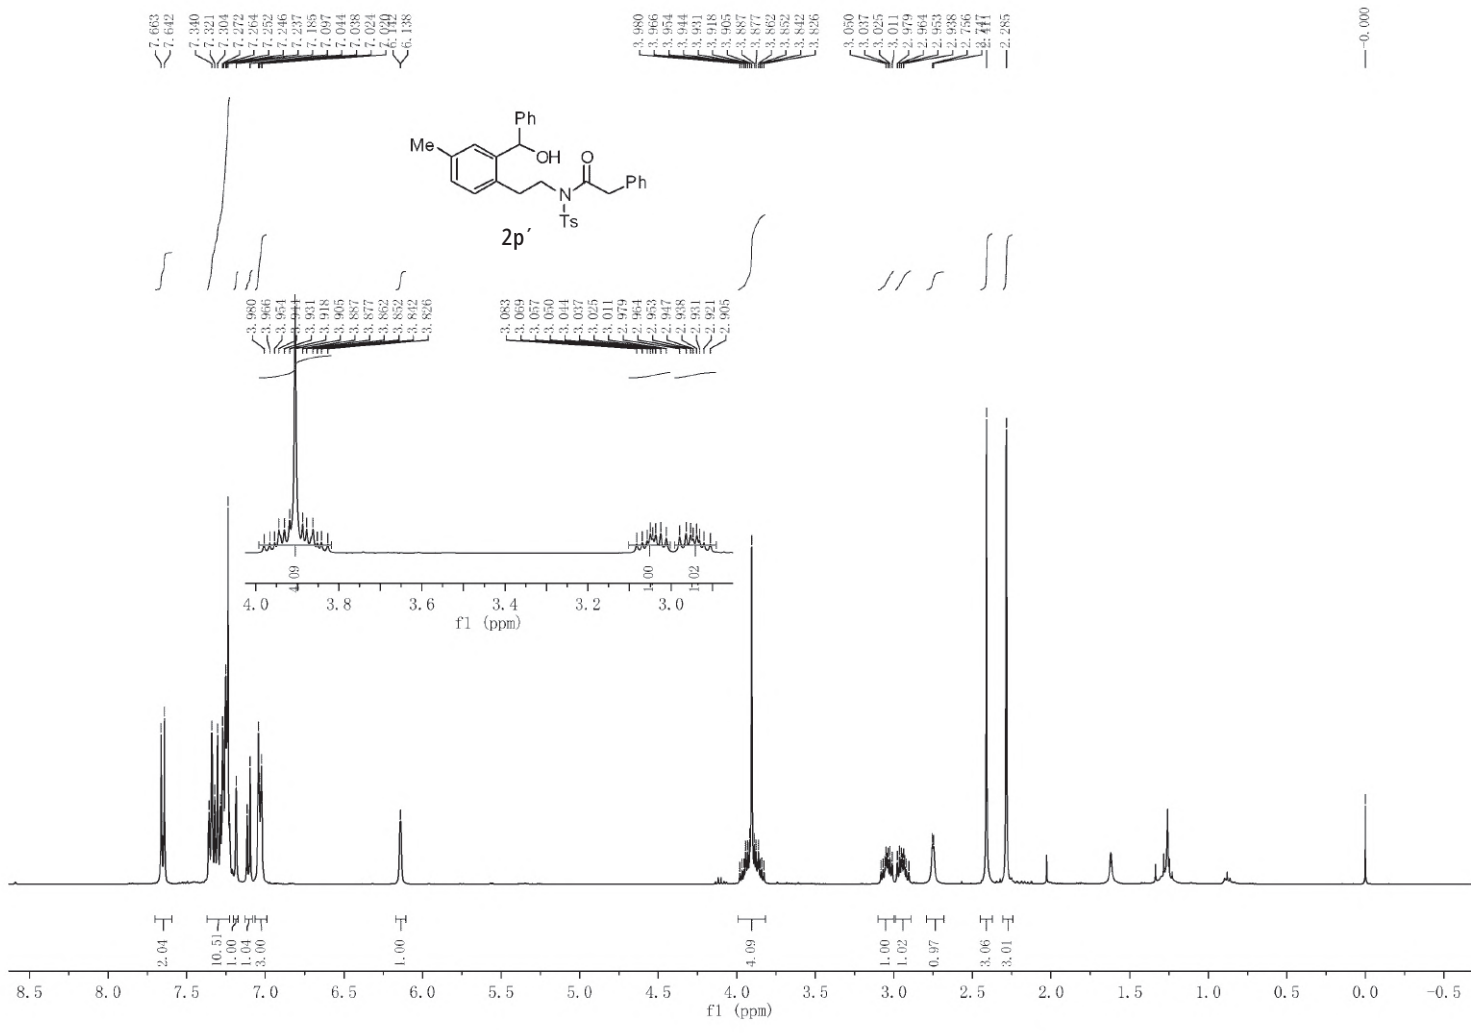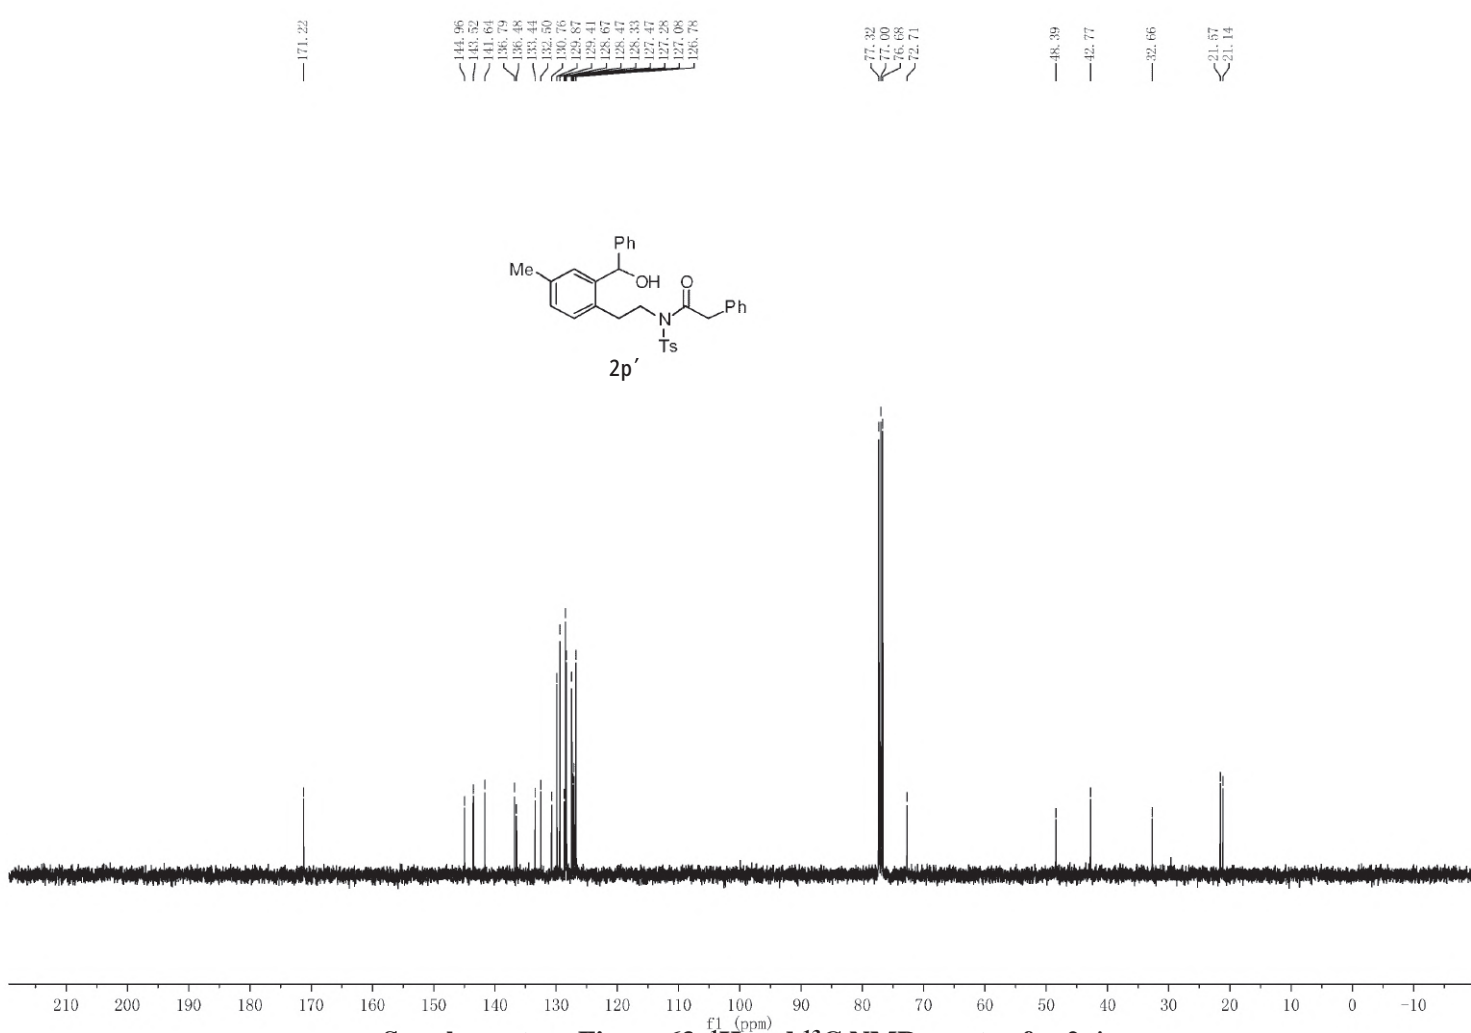

Supplementary Figure 63. <sup>1</sup>H and <sup>13</sup>C NMR spectra for 2p'



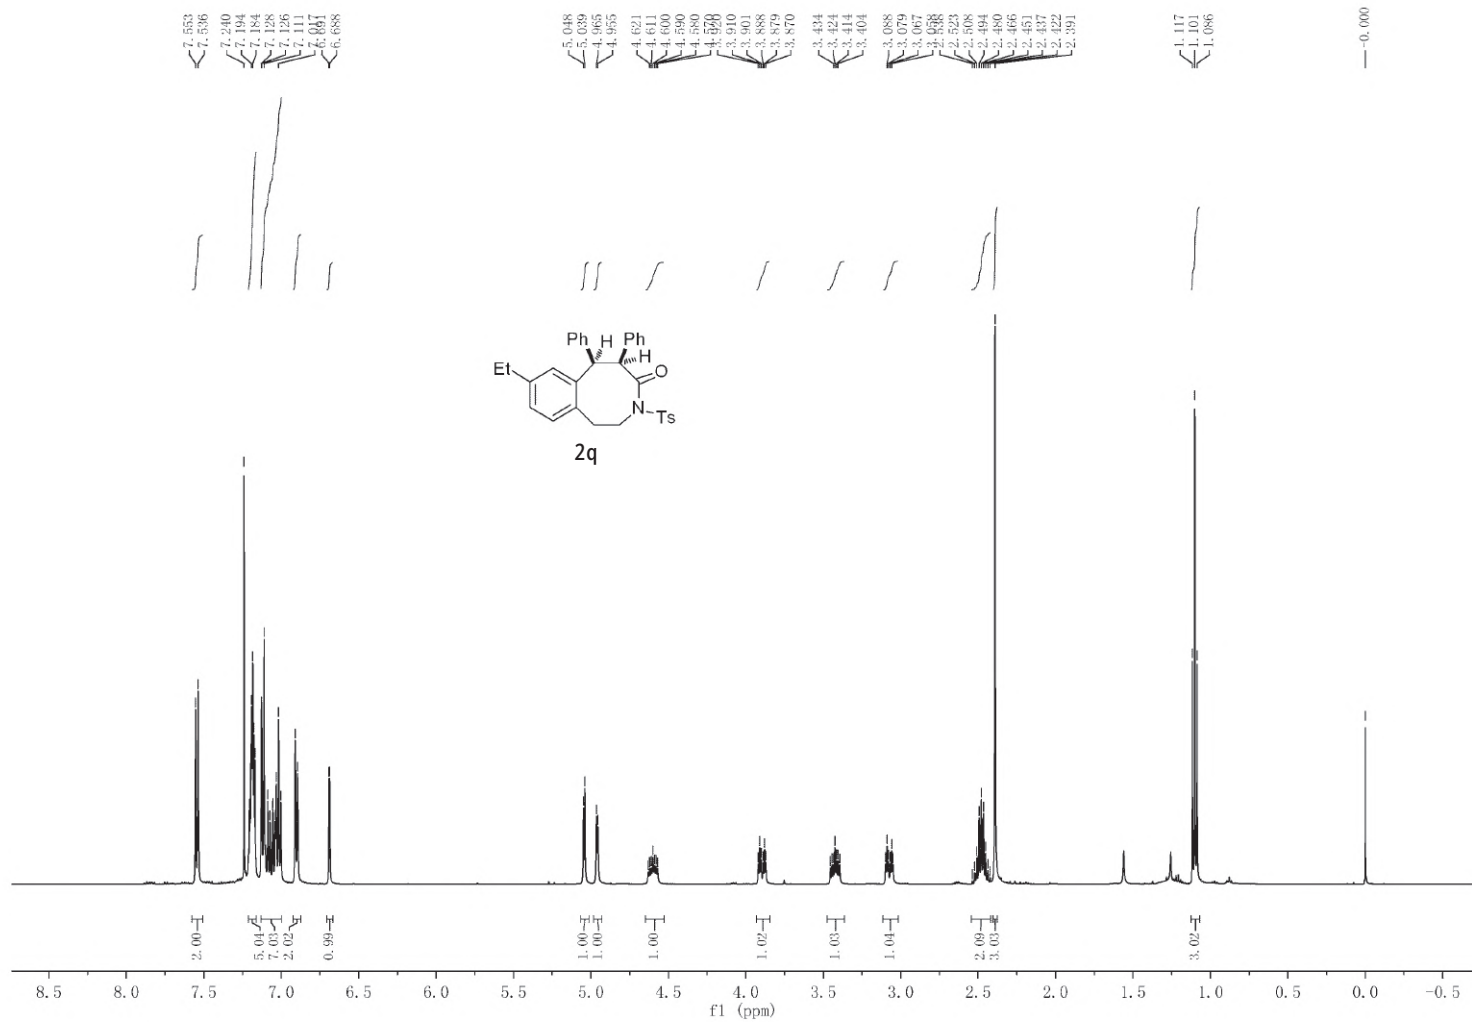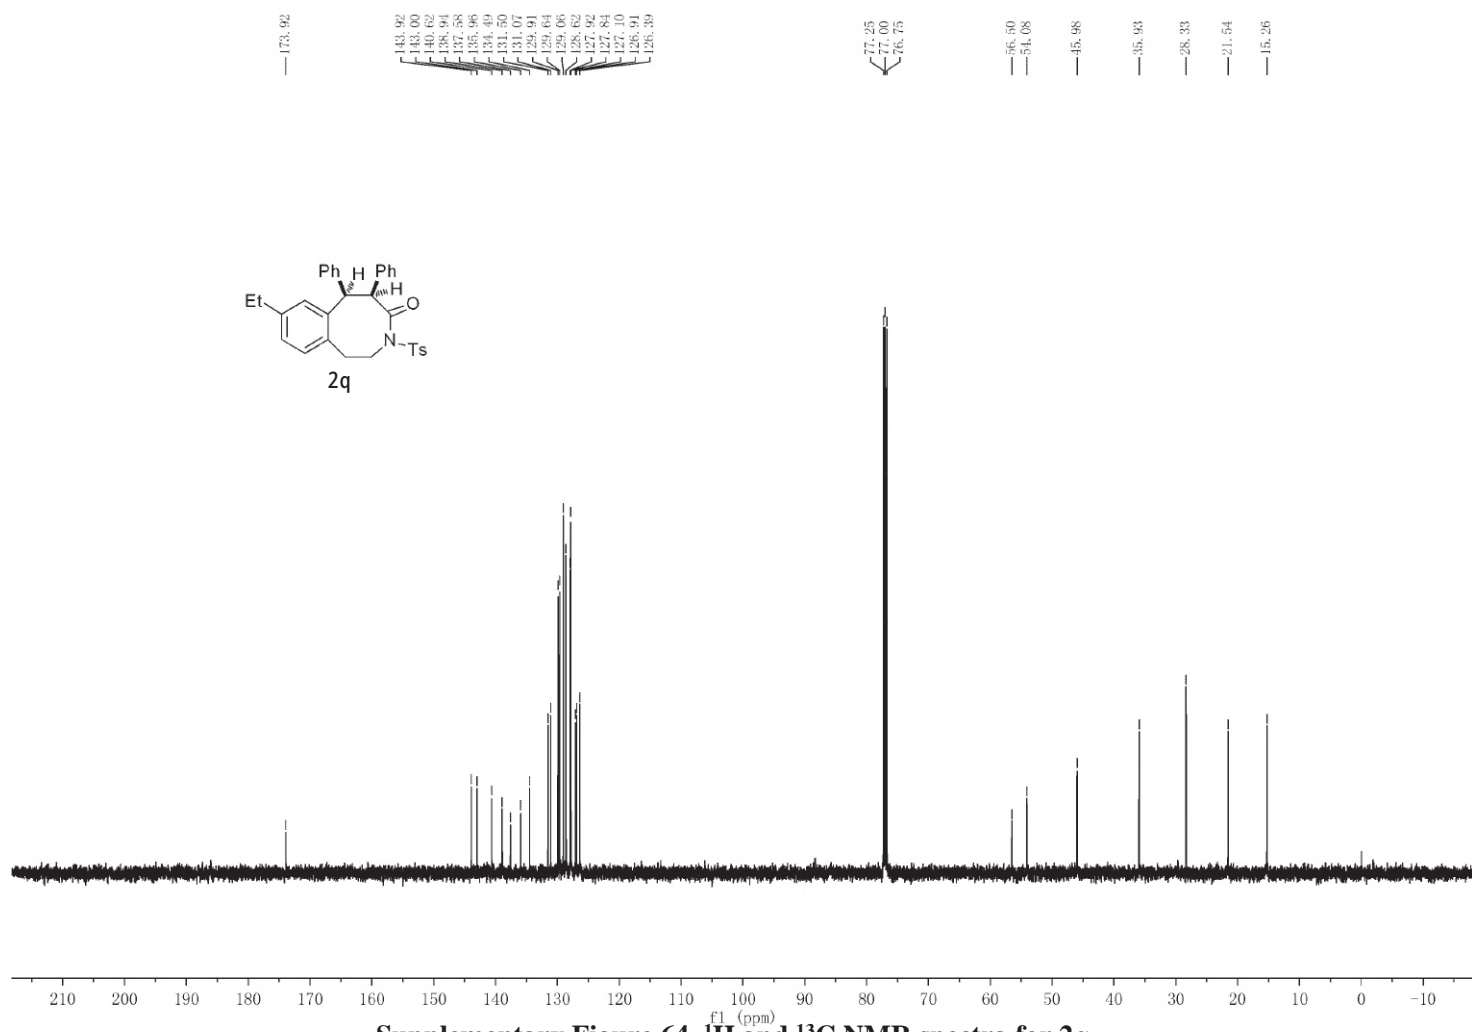

Supplementary Figure 64. <sup>1</sup>H and <sup>13</sup>C NMR spectra for 2q

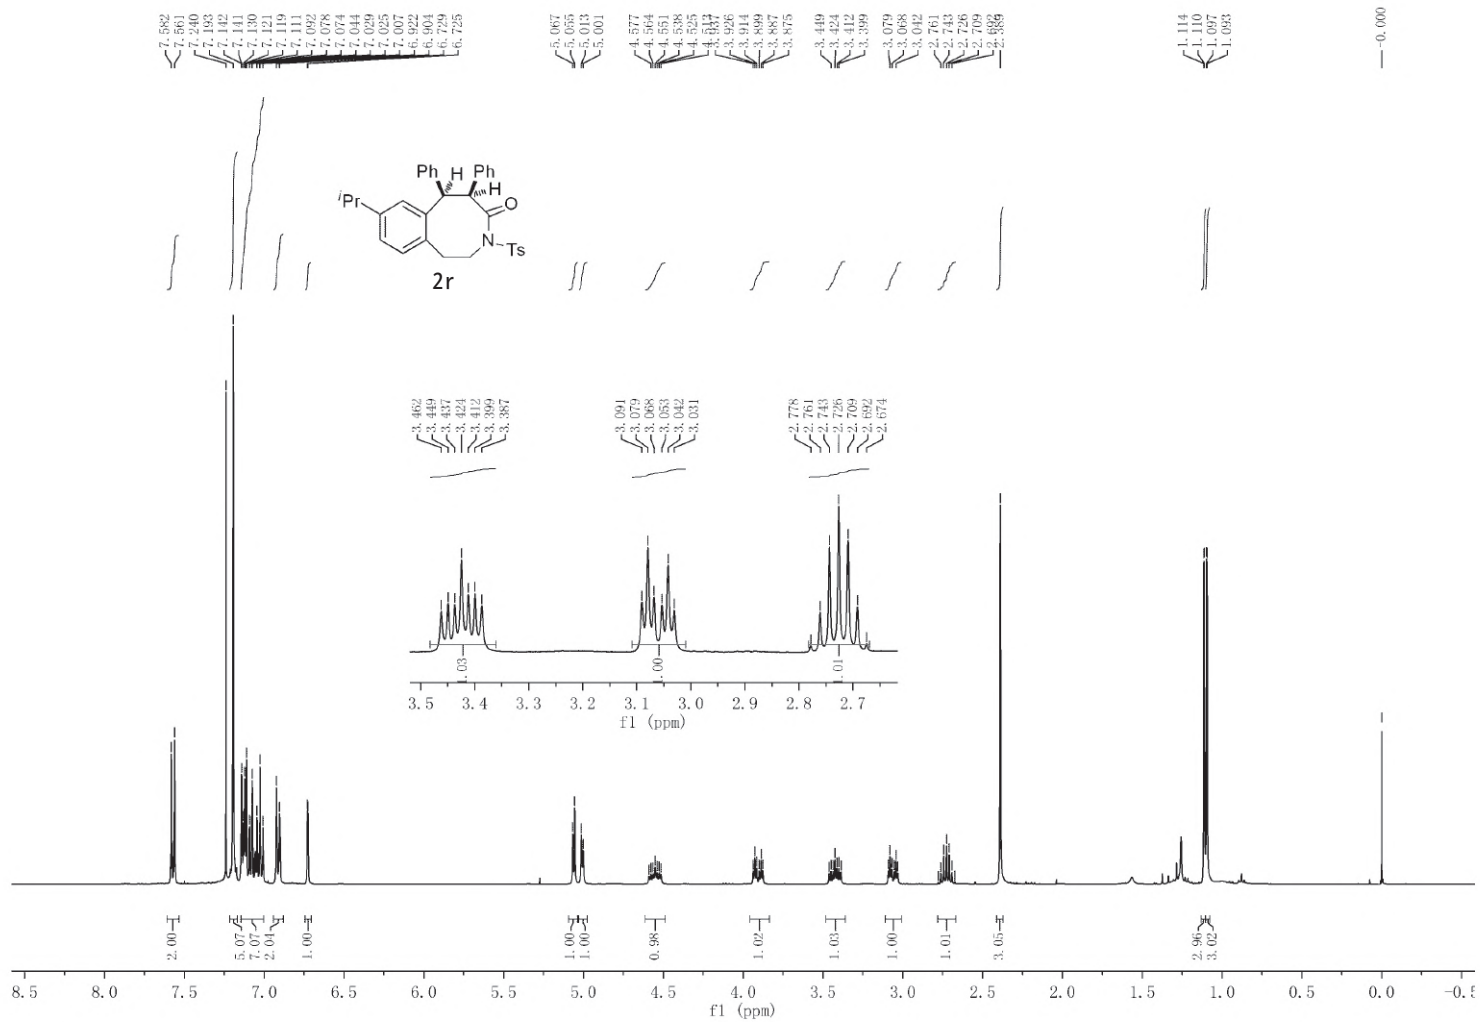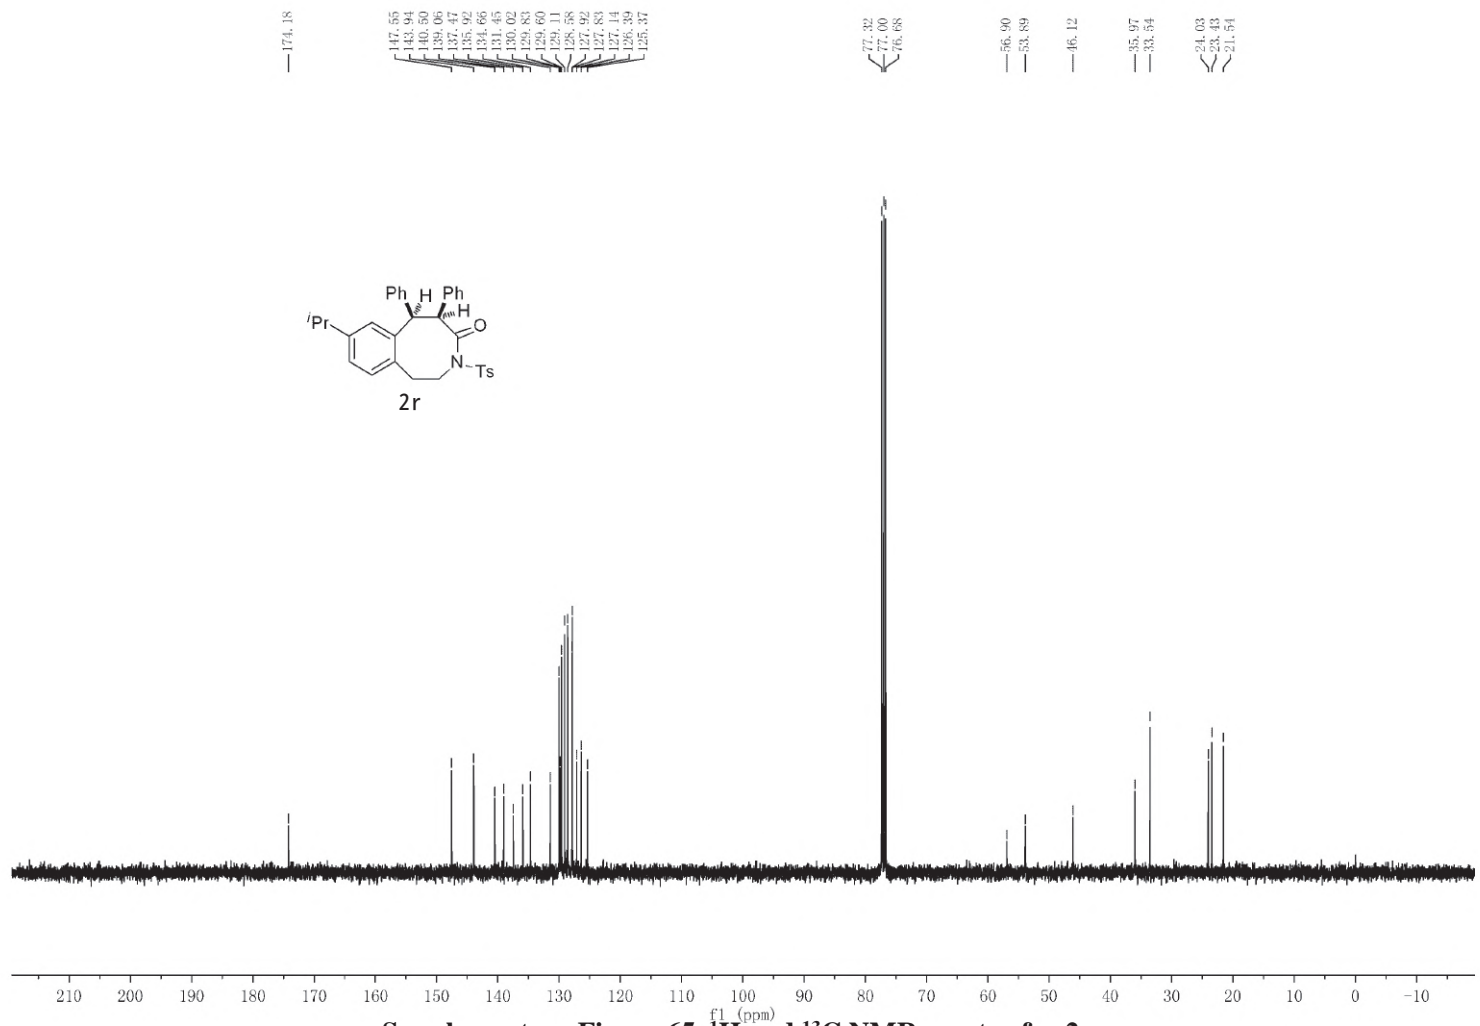

Supplementary Figure 65. <sup>1</sup>H and <sup>13</sup>C NMR spectra for **2r**

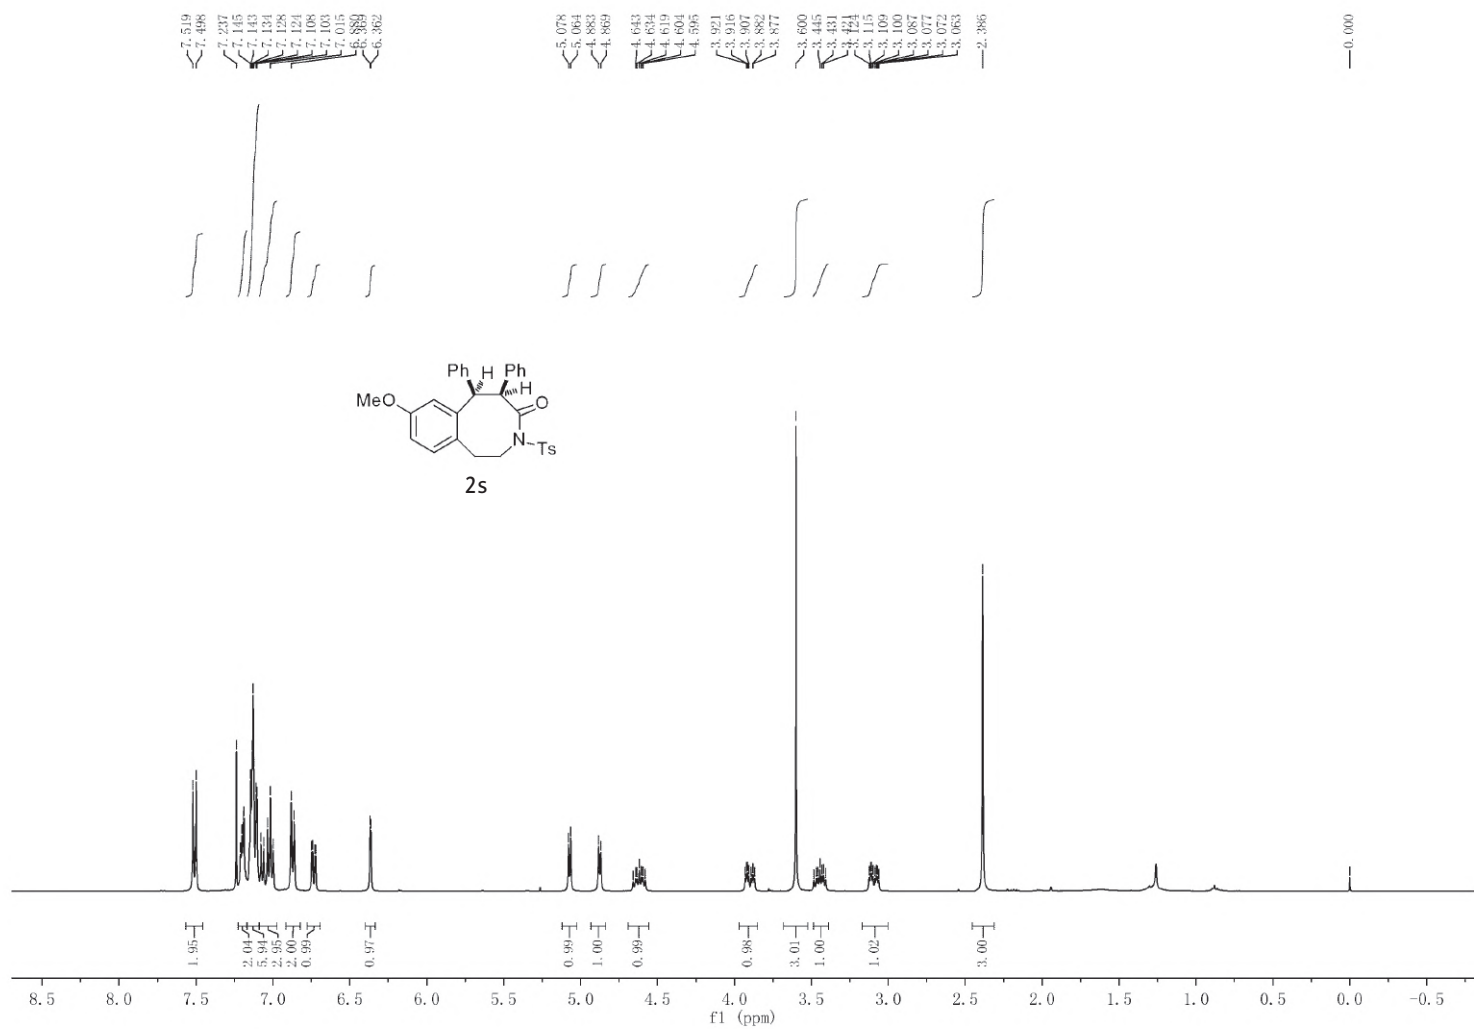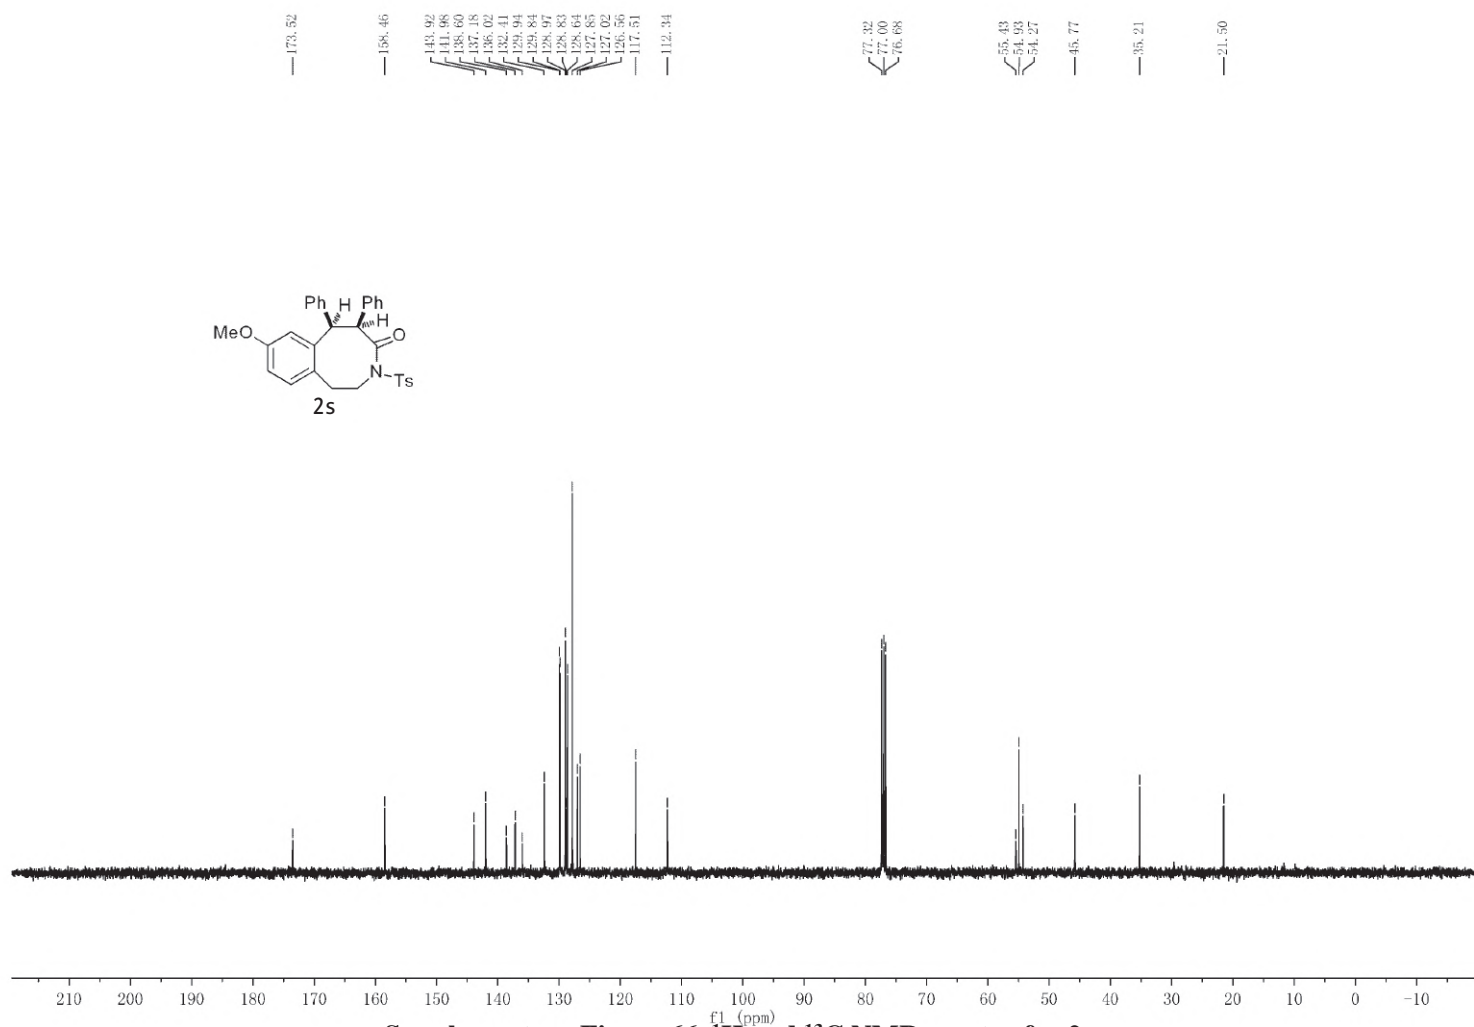

Supplementary Figure 66. <sup>1</sup>H and <sup>13</sup>C NMR spectra for **2s**

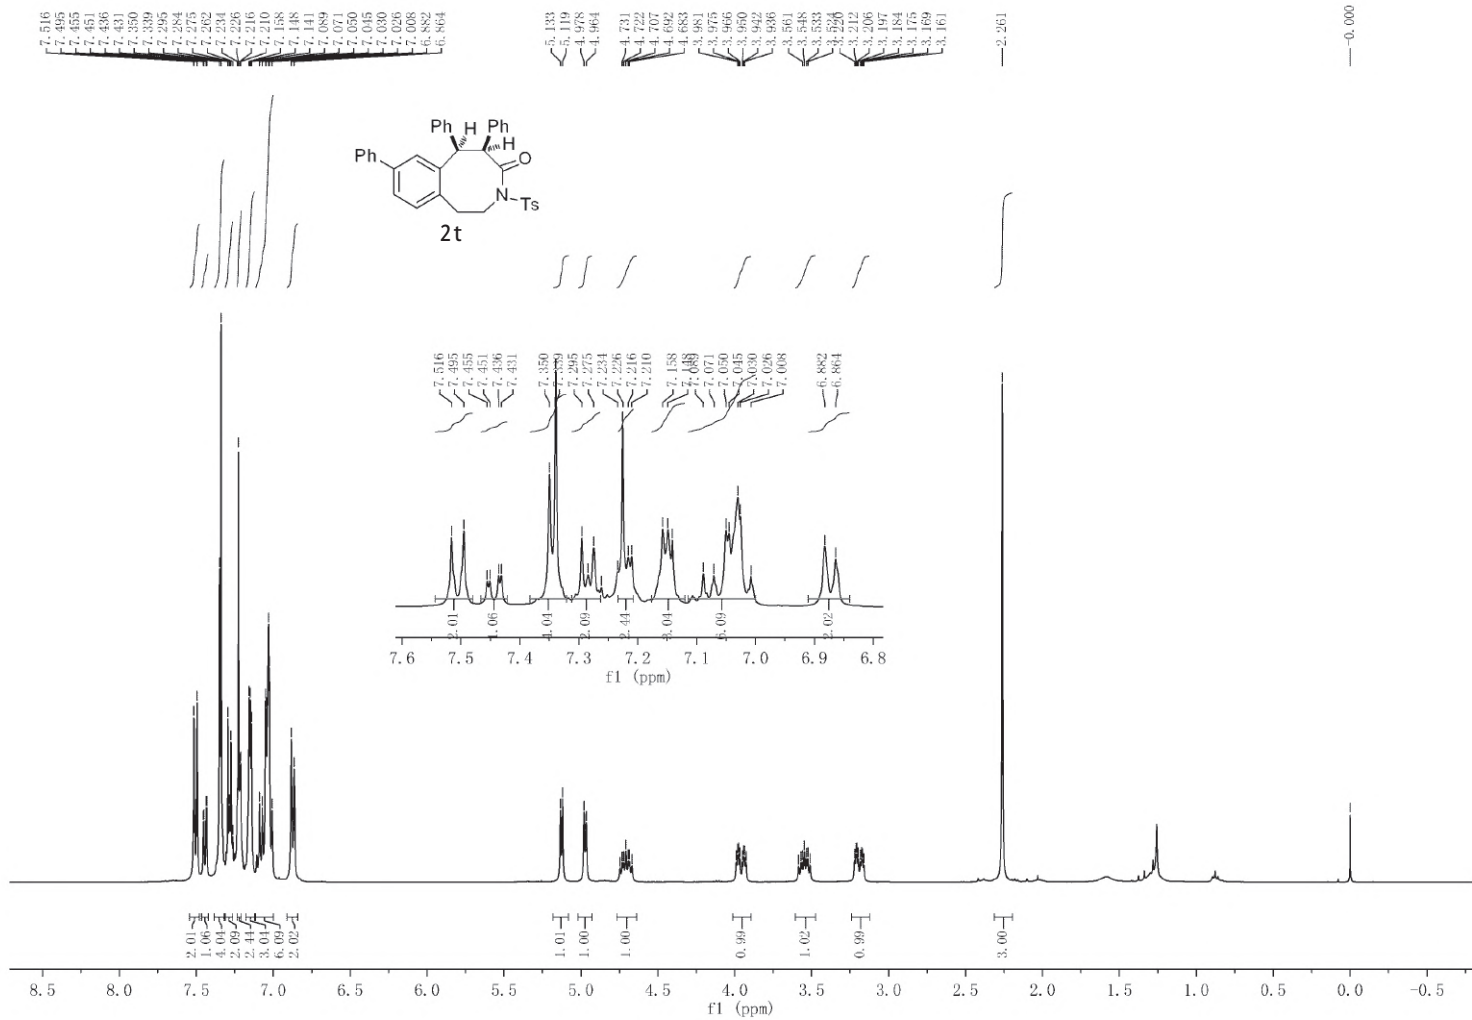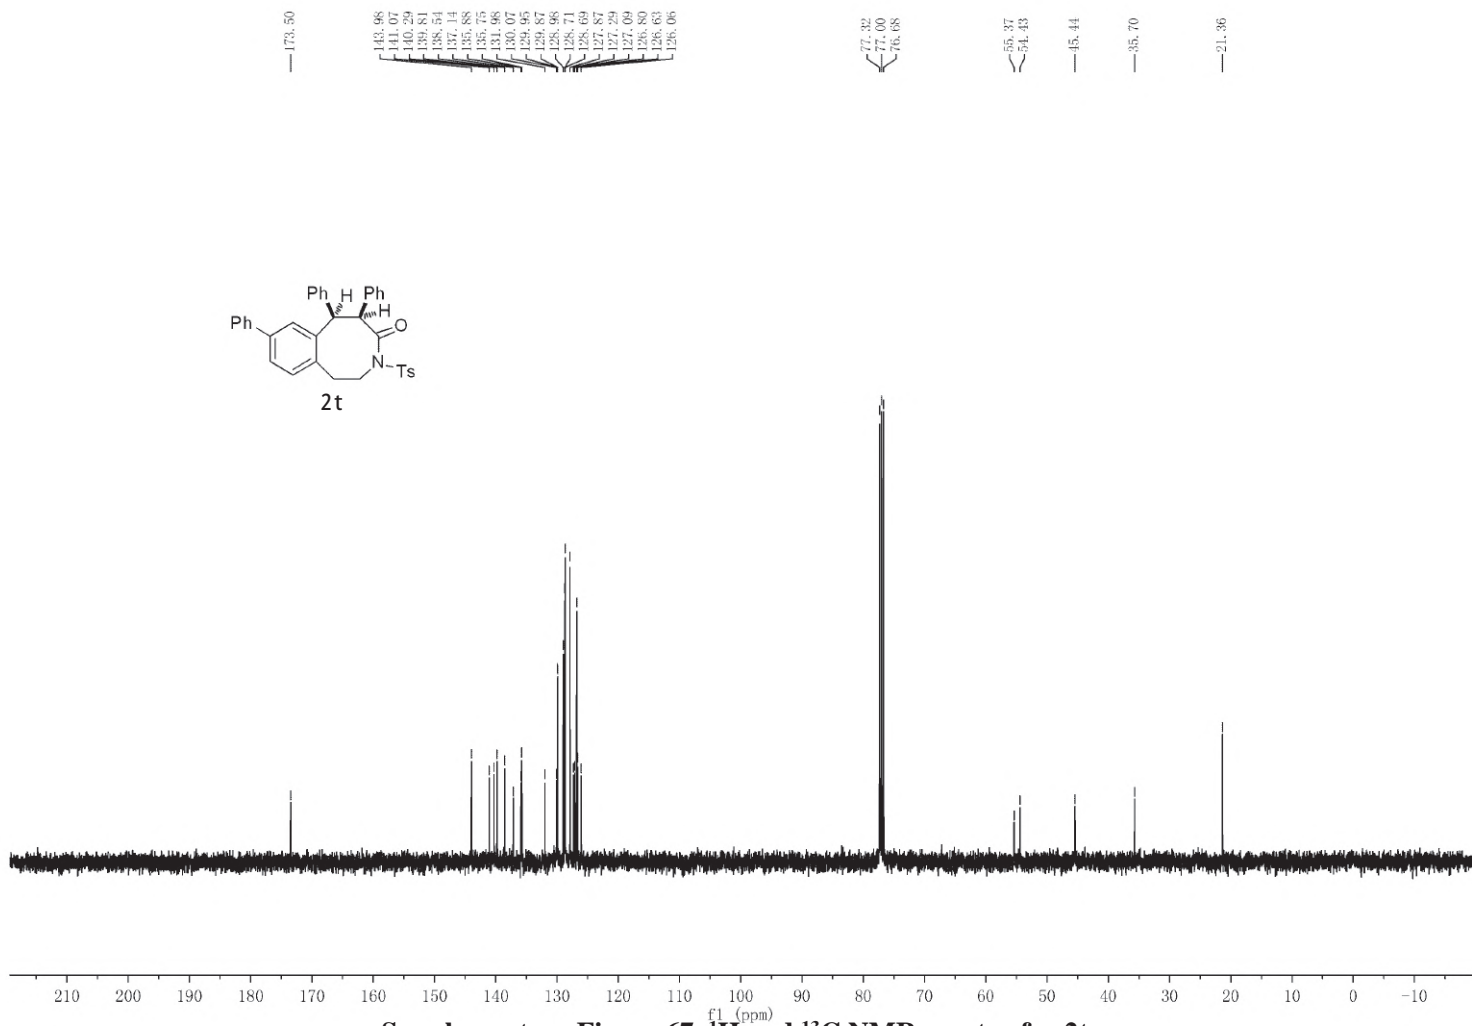

Supplementary Figure 67. <sup>1</sup>H and <sup>13</sup>C NMR spectra for **2t**

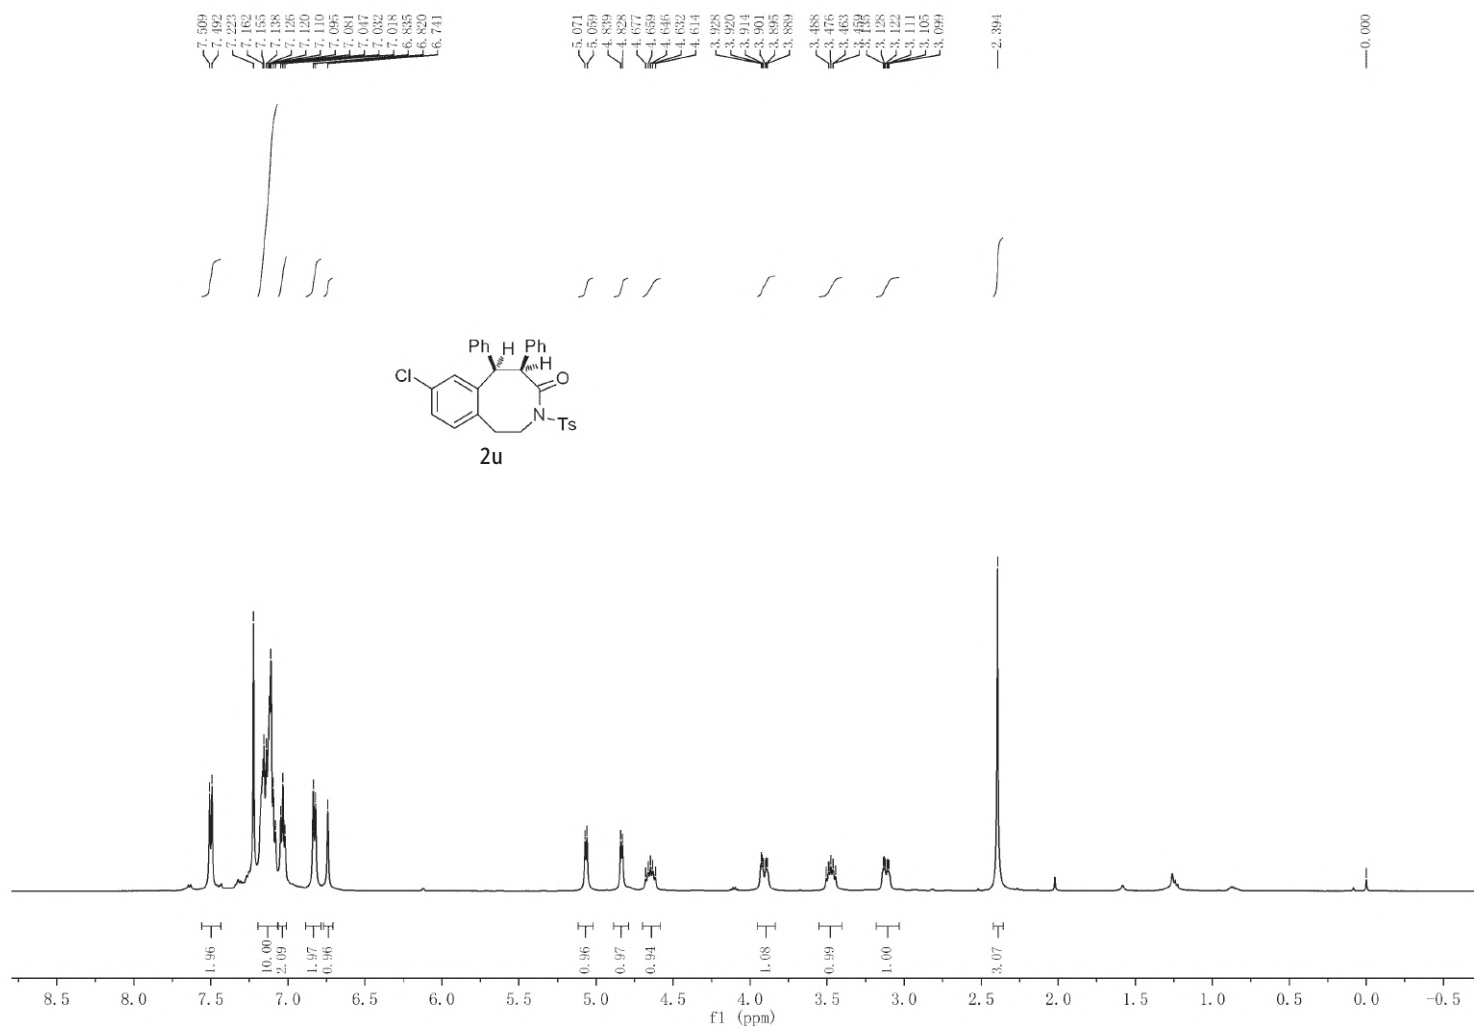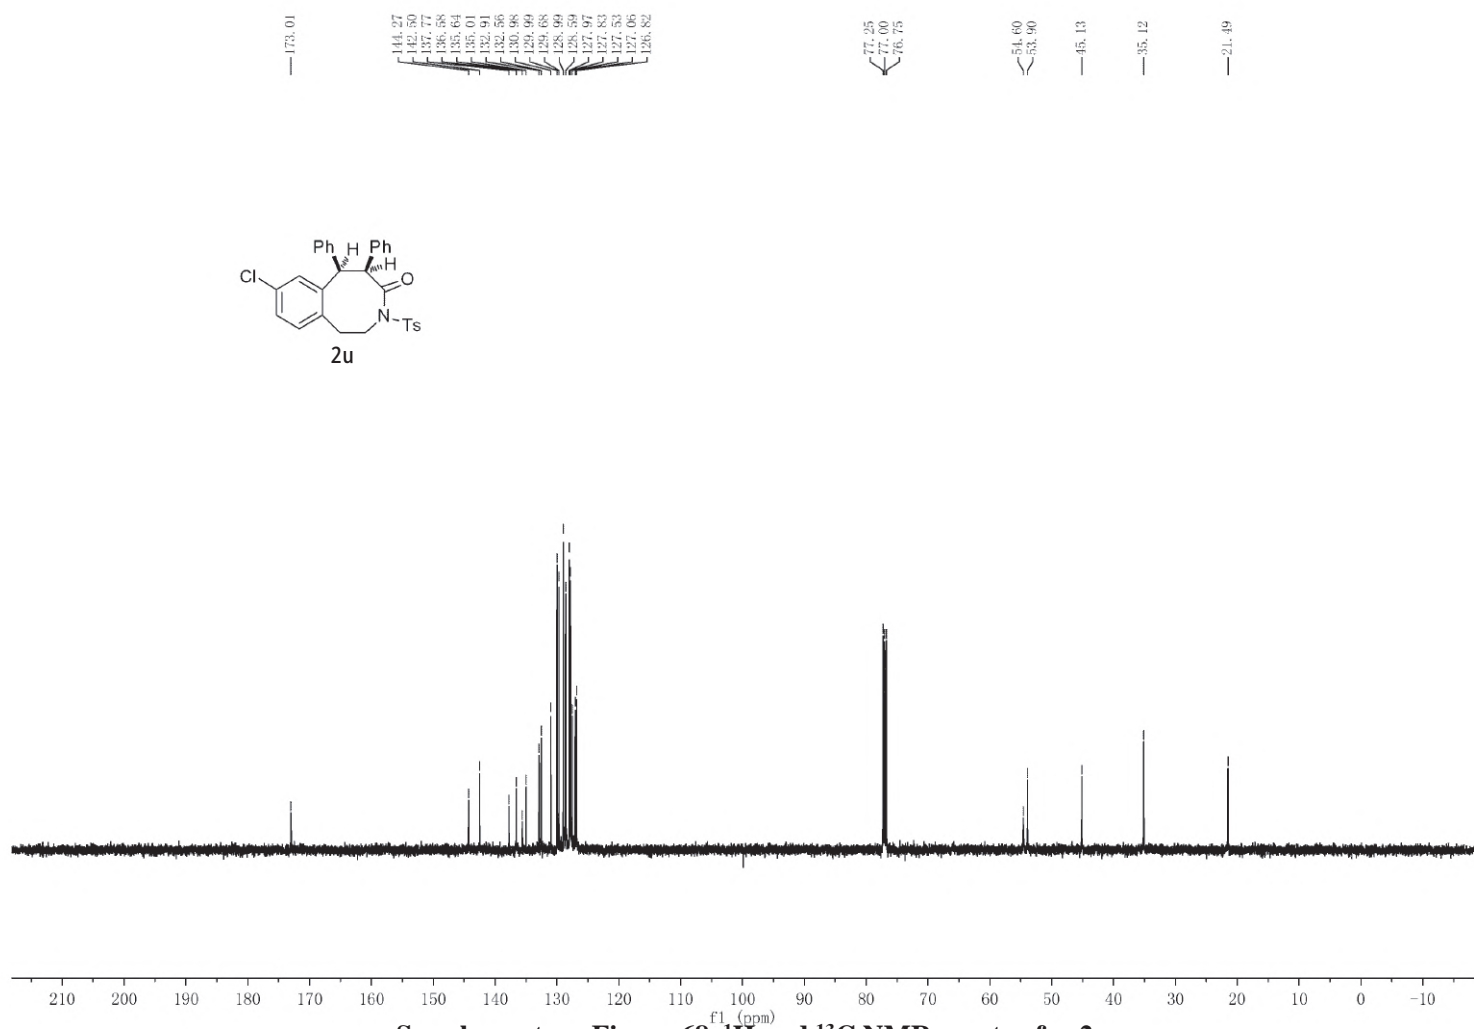

Supplementary Figure 68. <sup>1</sup>H and <sup>13</sup>C NMR spectra for 2u

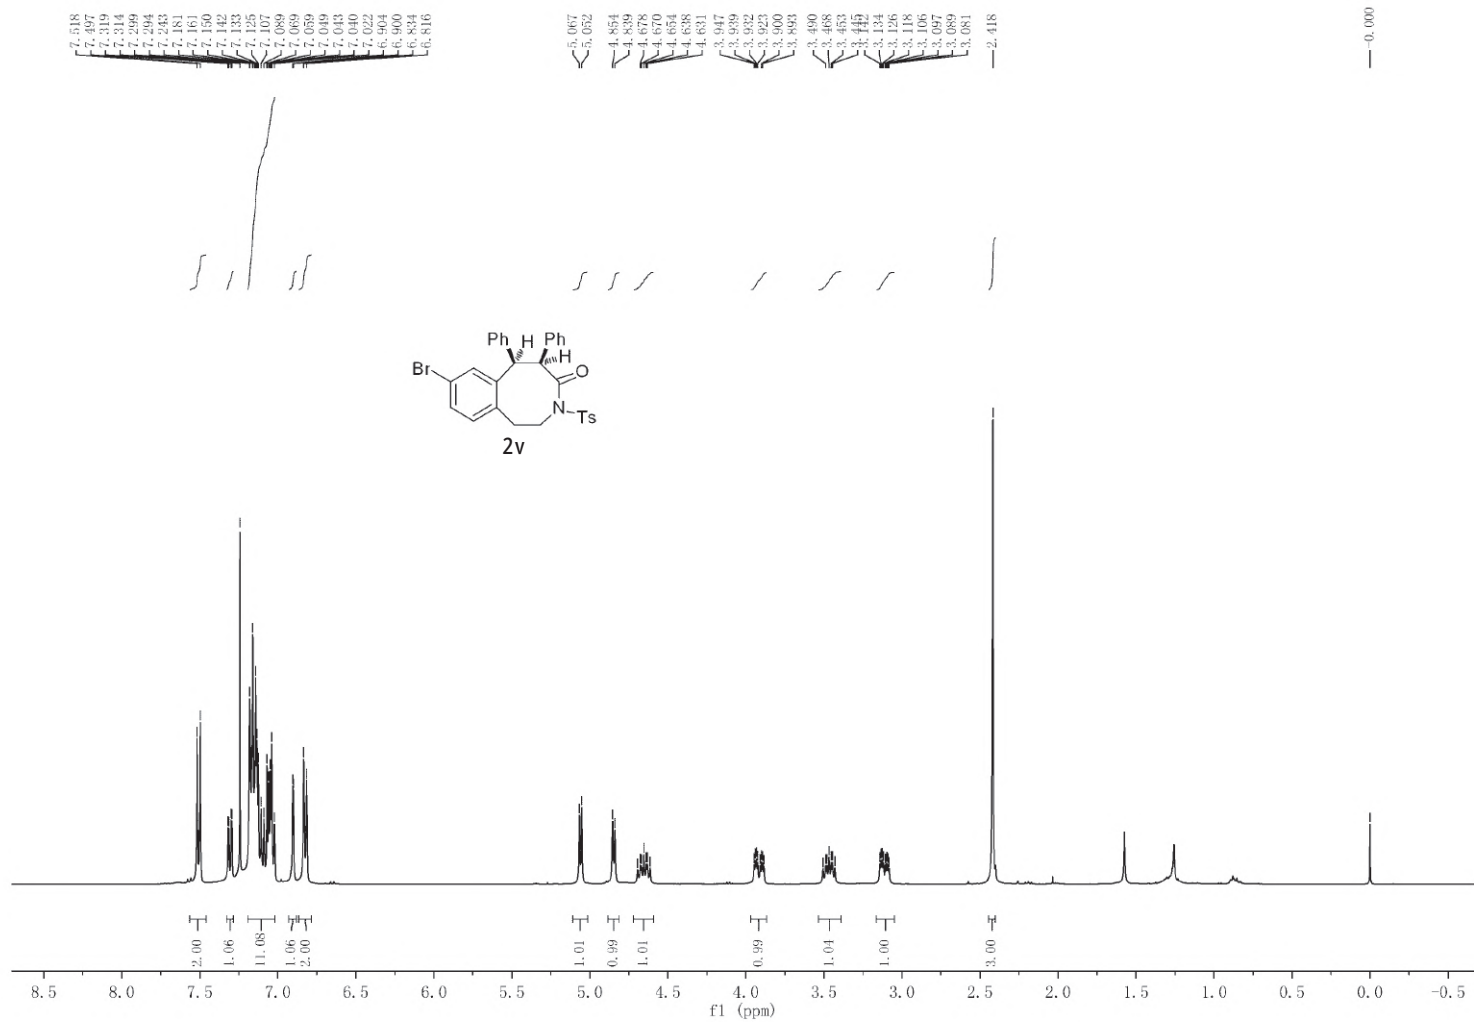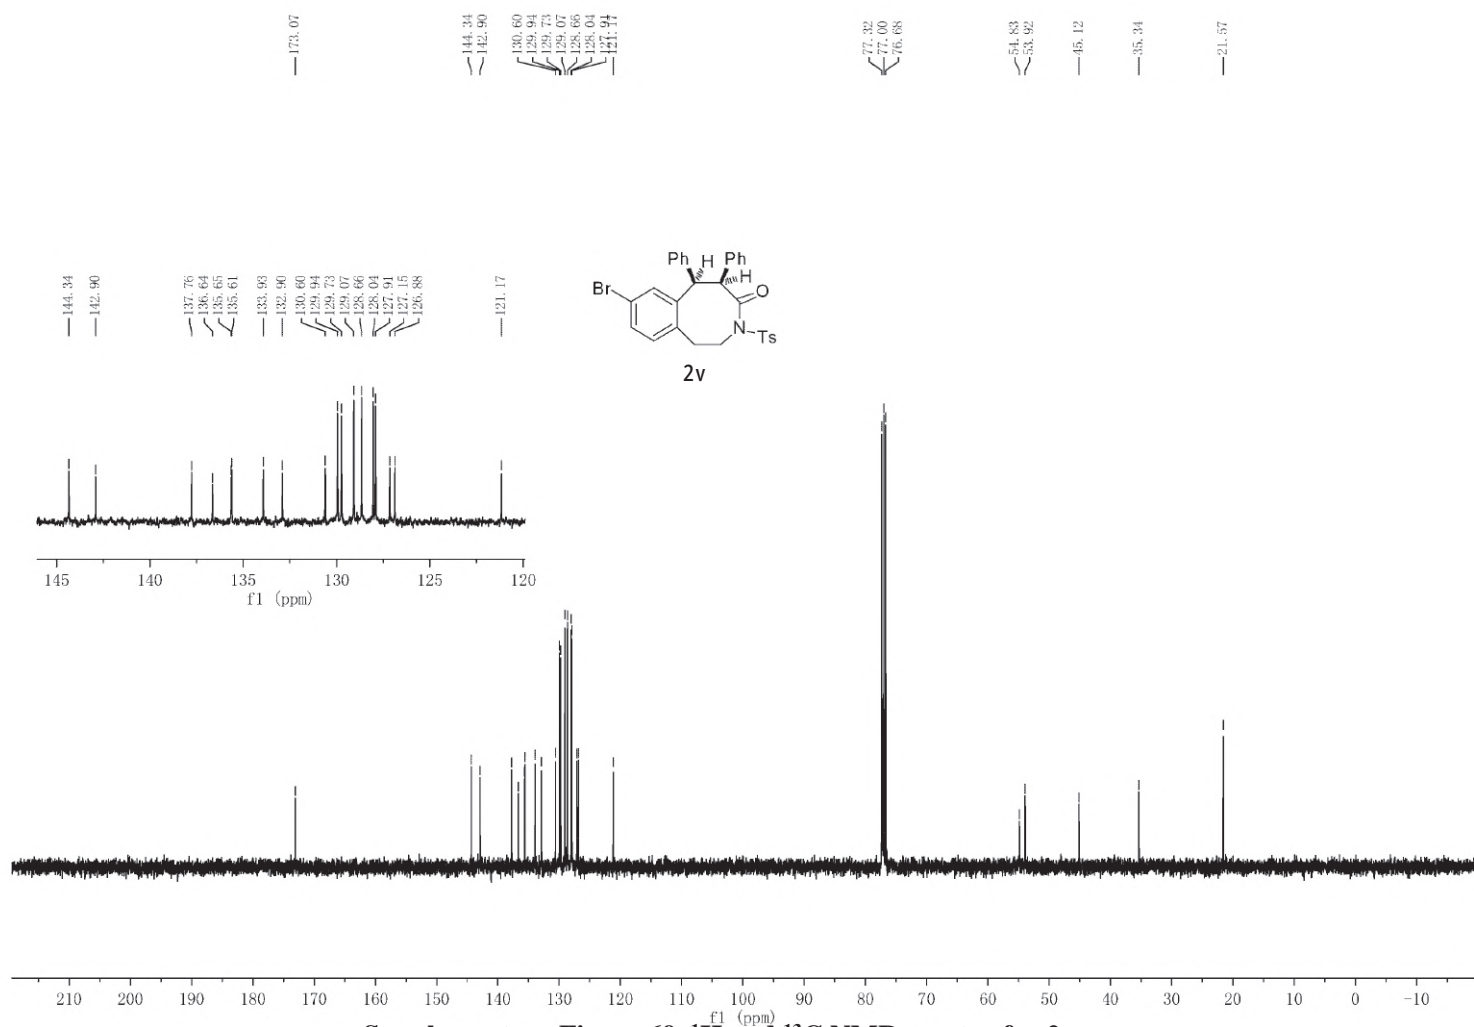

Supplementary Figure 69. <sup>1</sup>H and <sup>13</sup>C NMR spectra for **2v**

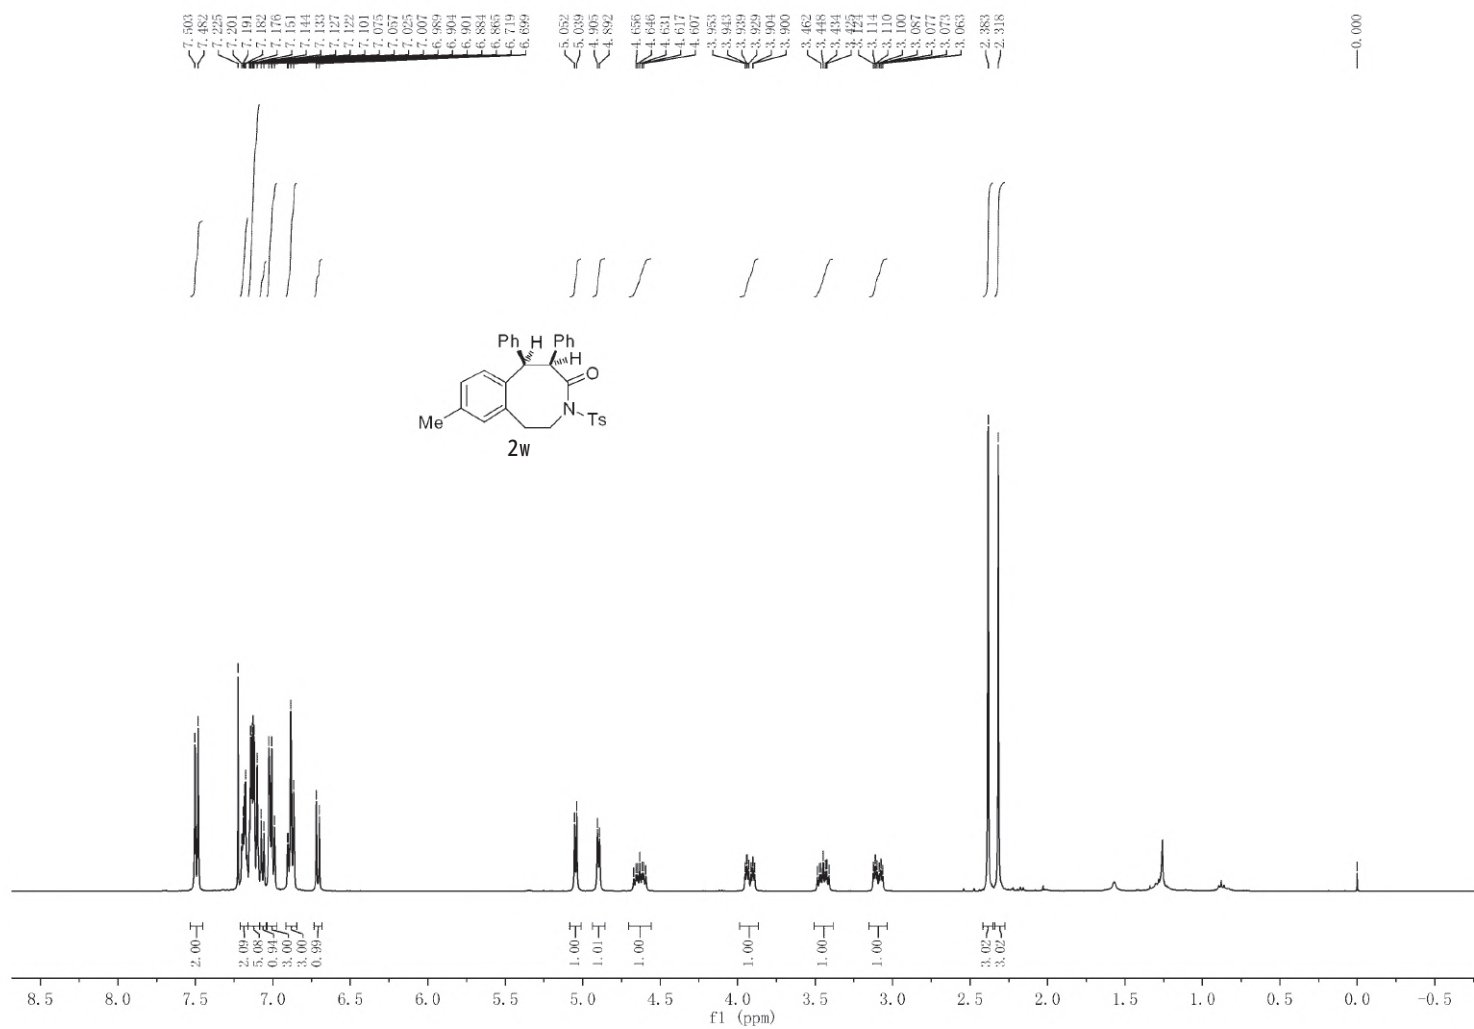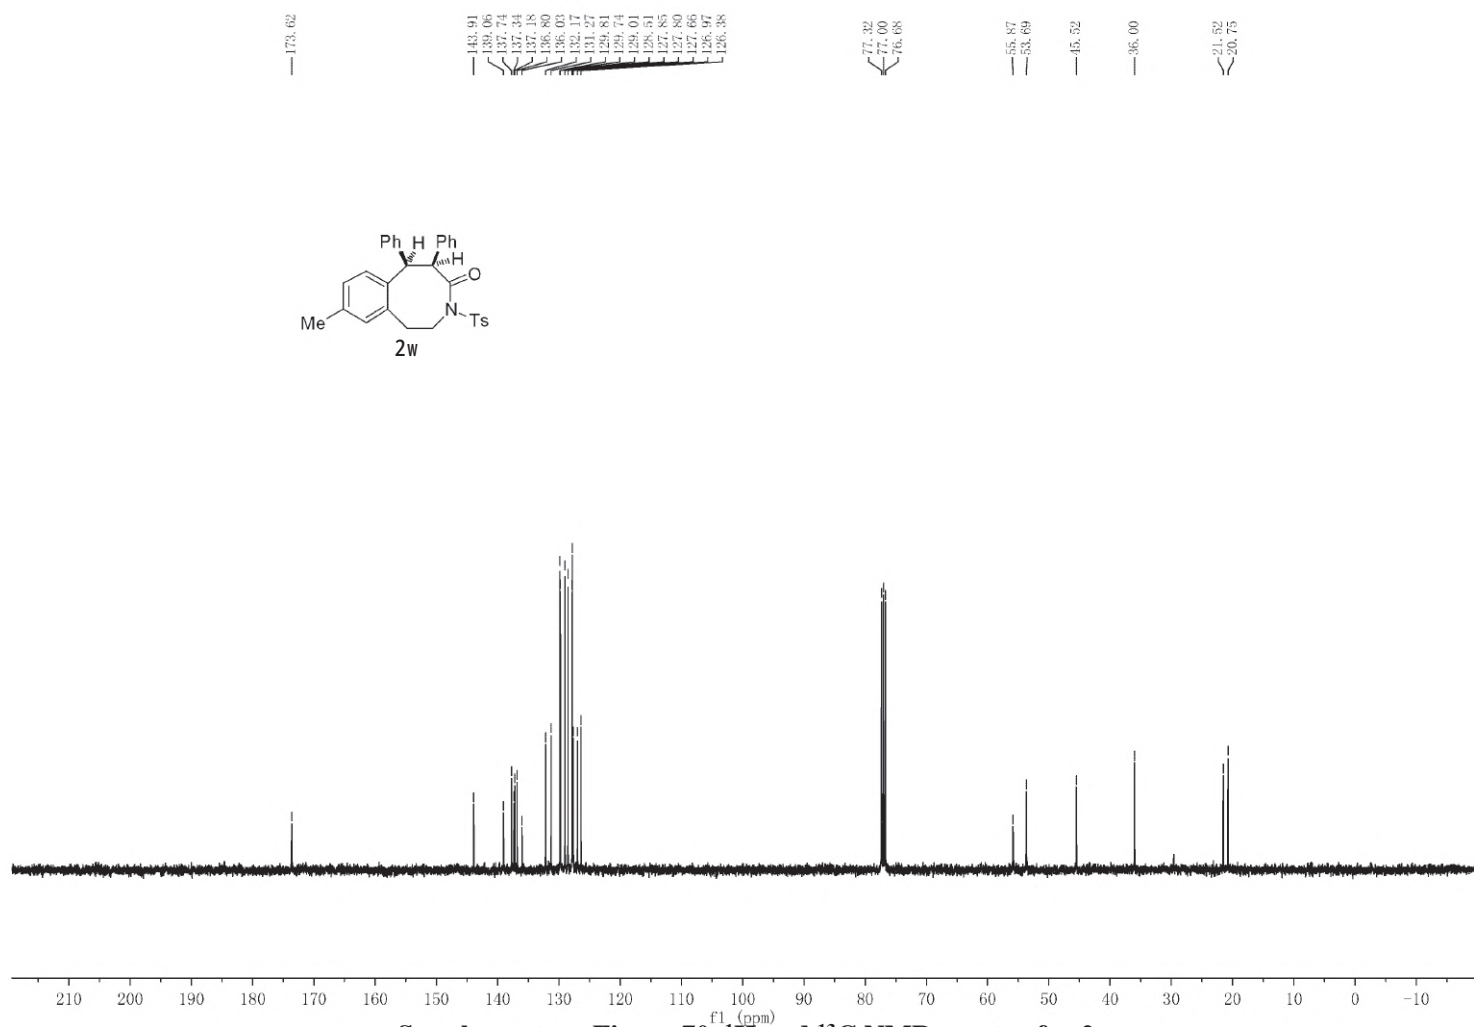

Supplementary Figure 70. <sup>1</sup>H and <sup>13</sup>C NMR spectra for 2w

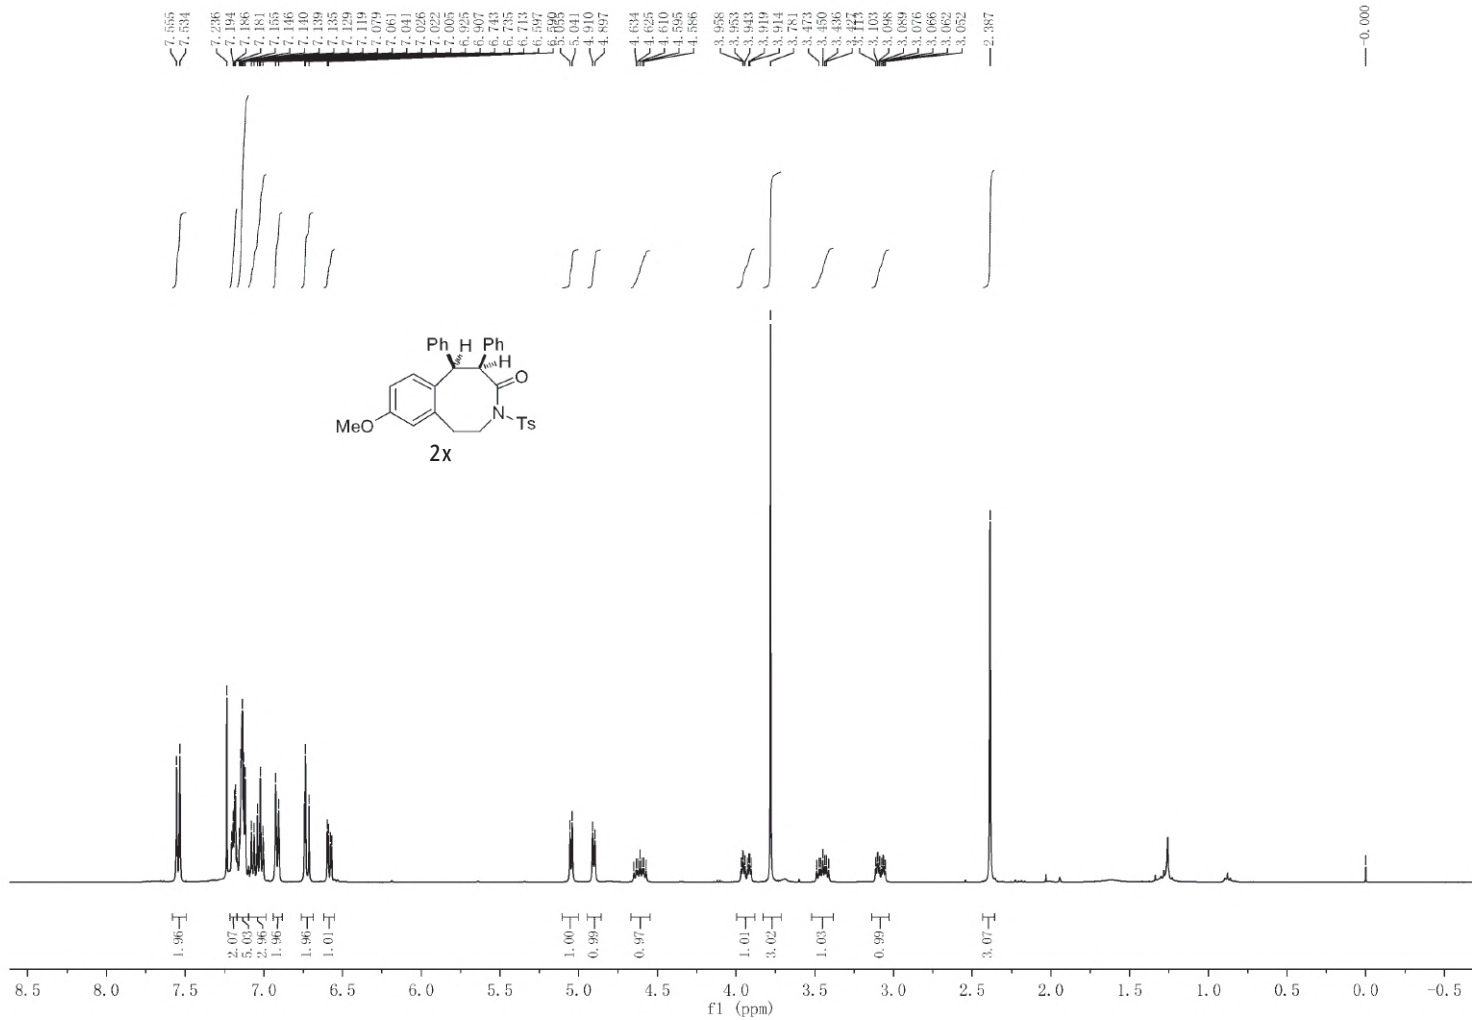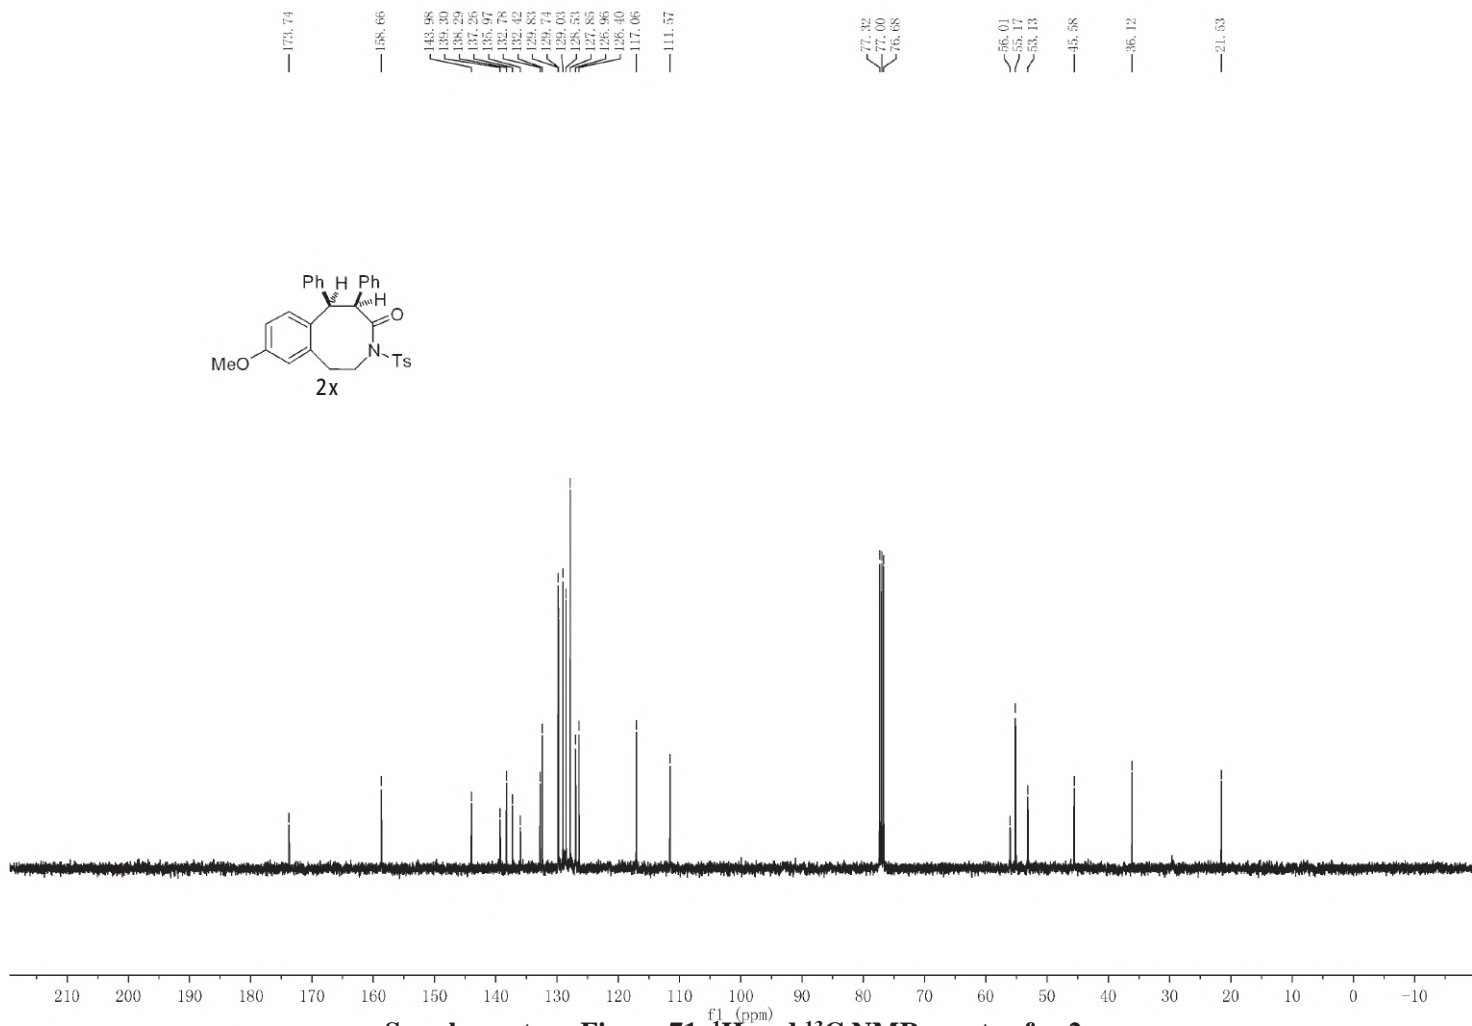

Supplementary Figure 71. <sup>1</sup>H and <sup>13</sup>C NMR spectra for **2x**



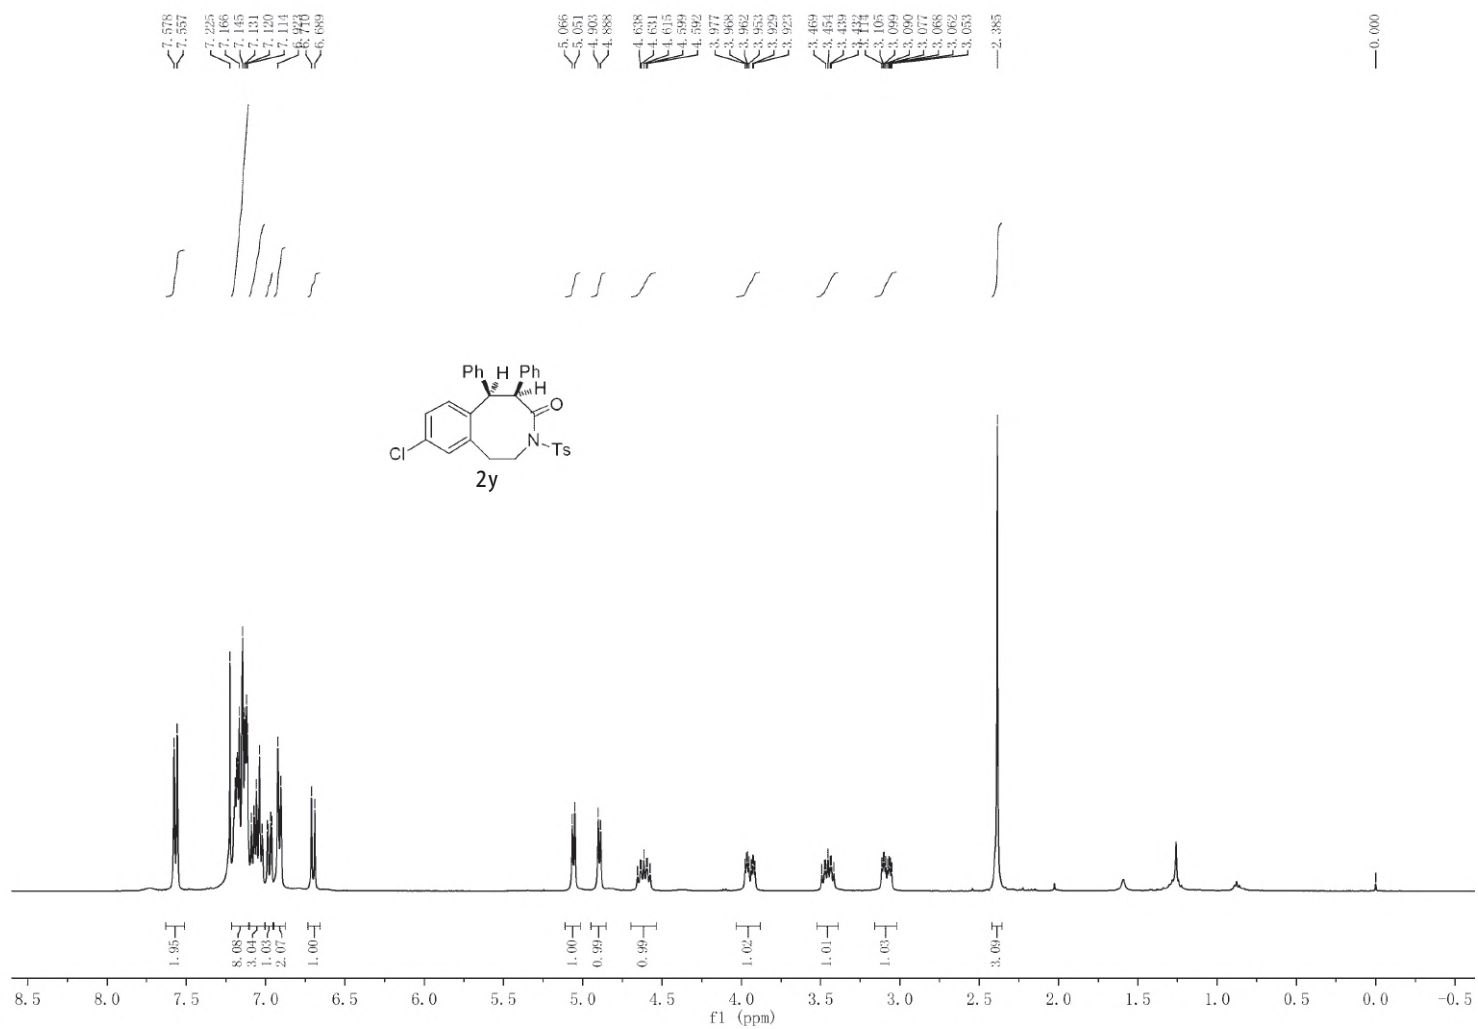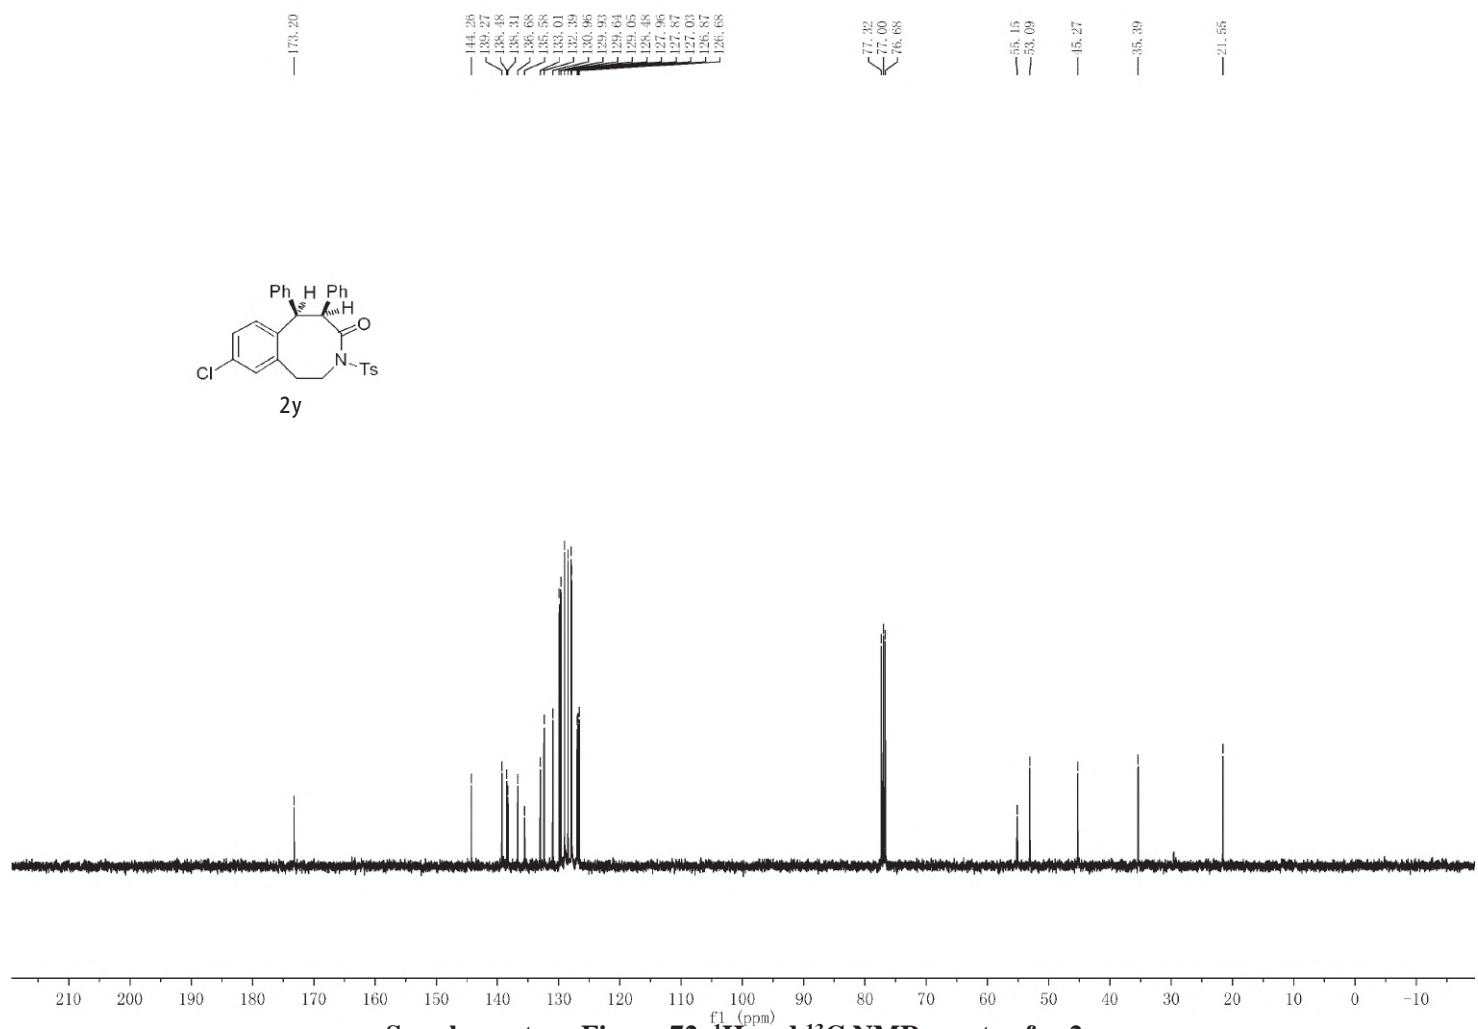

Supplementary Figure 72. <sup>1</sup>H and <sup>13</sup>C NMR spectra for 2y

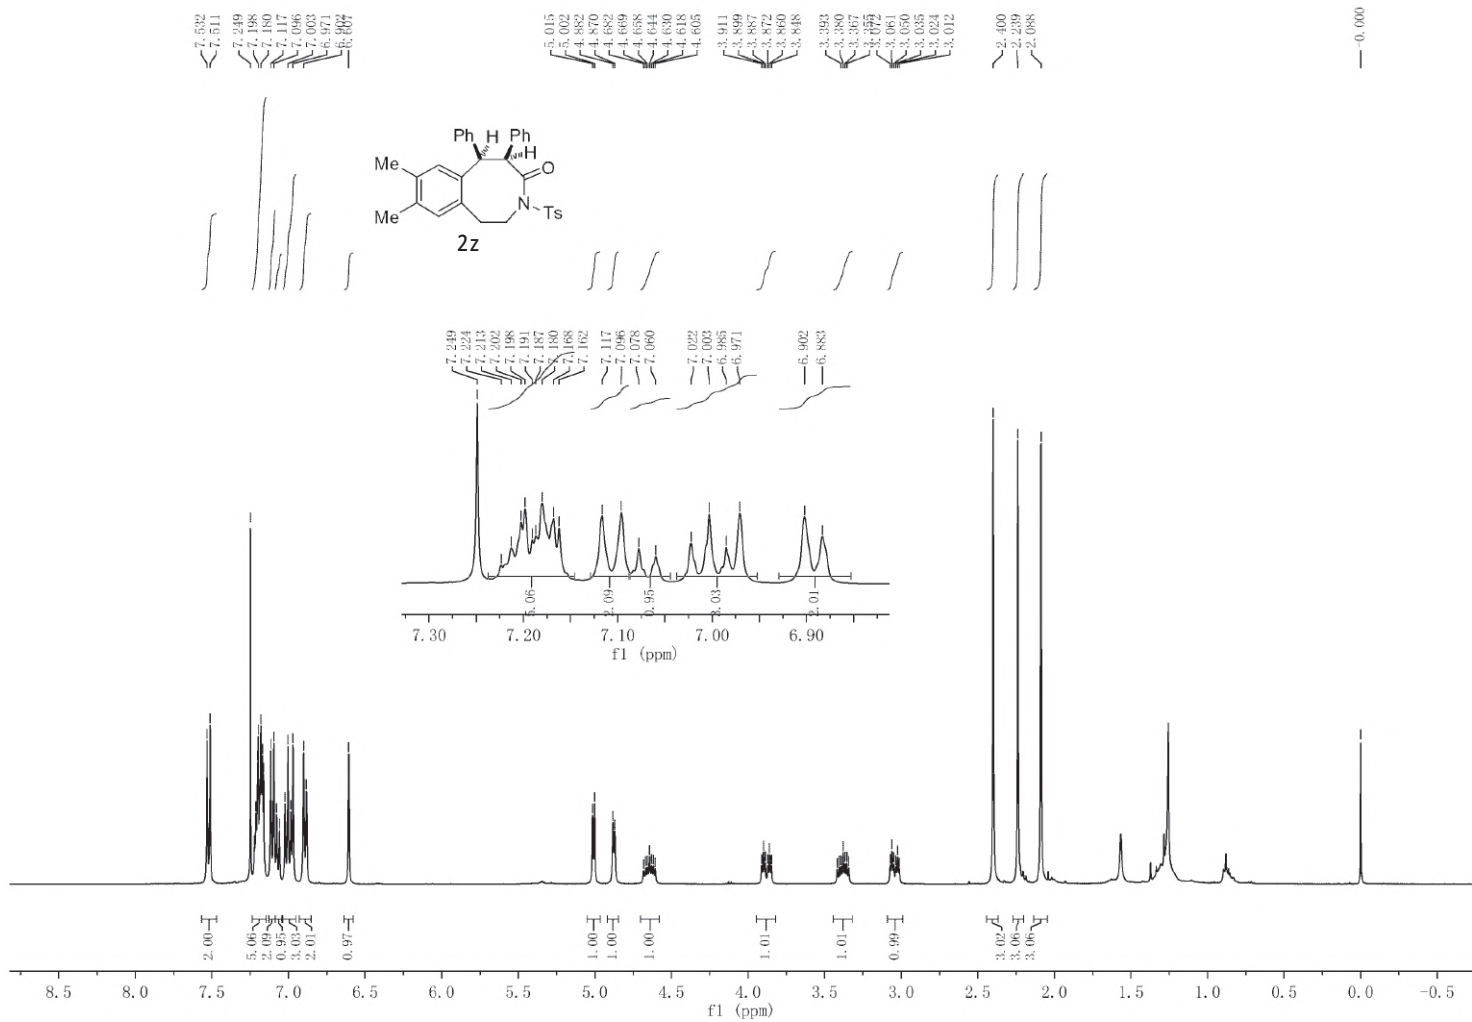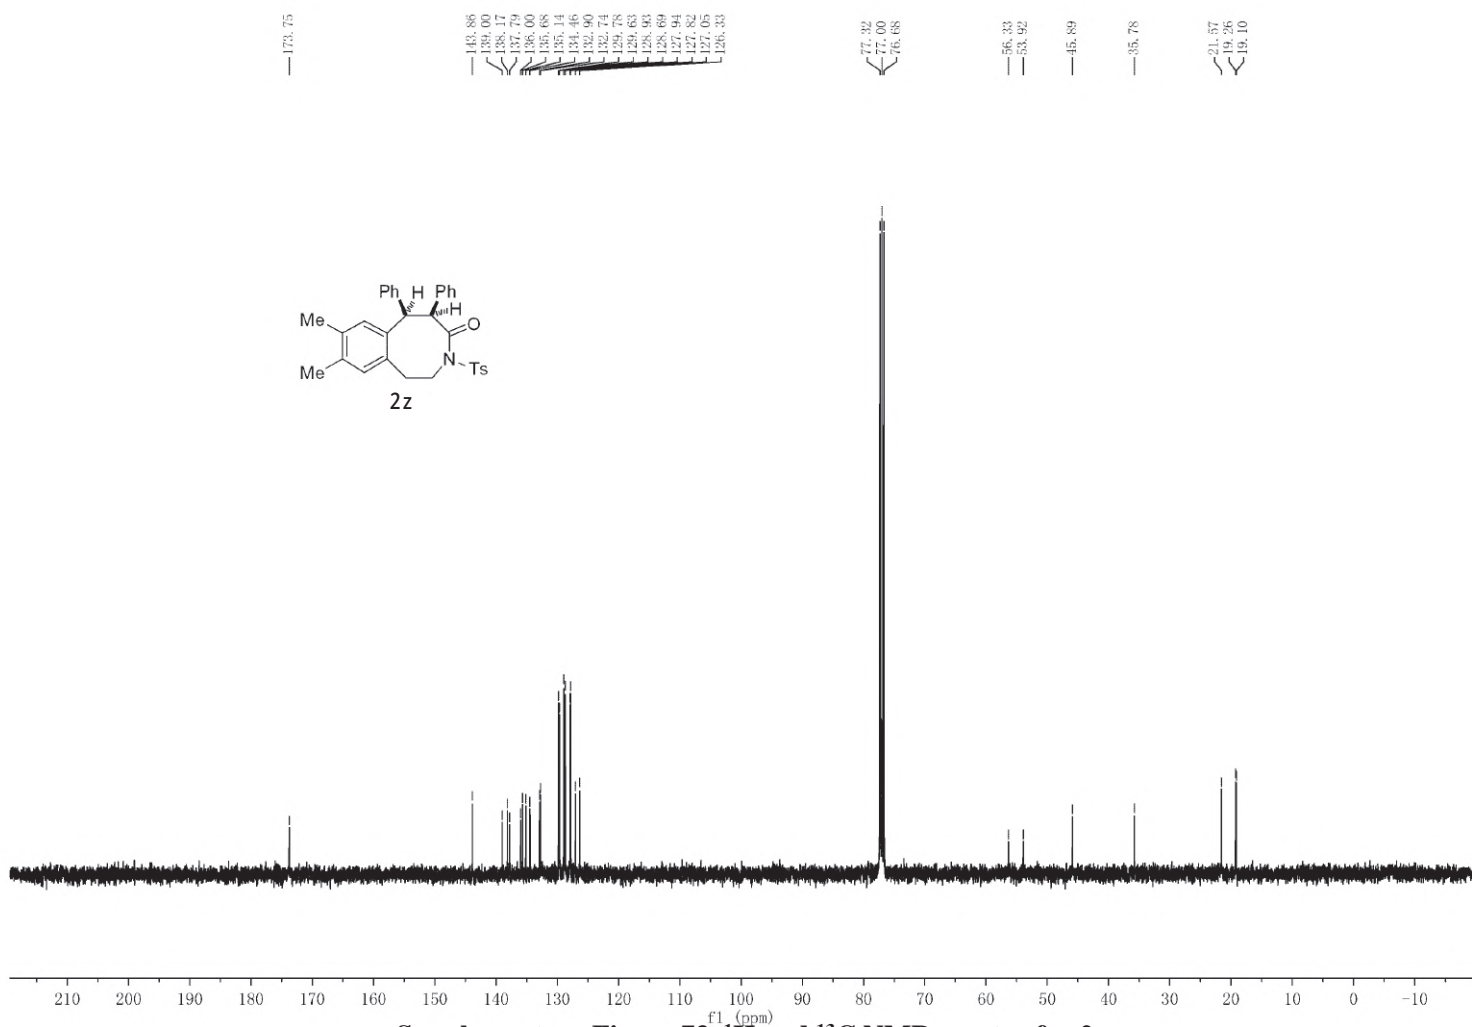

Supplementary Figure 73. <sup>1</sup>H and <sup>13</sup>C NMR spectra for 2z

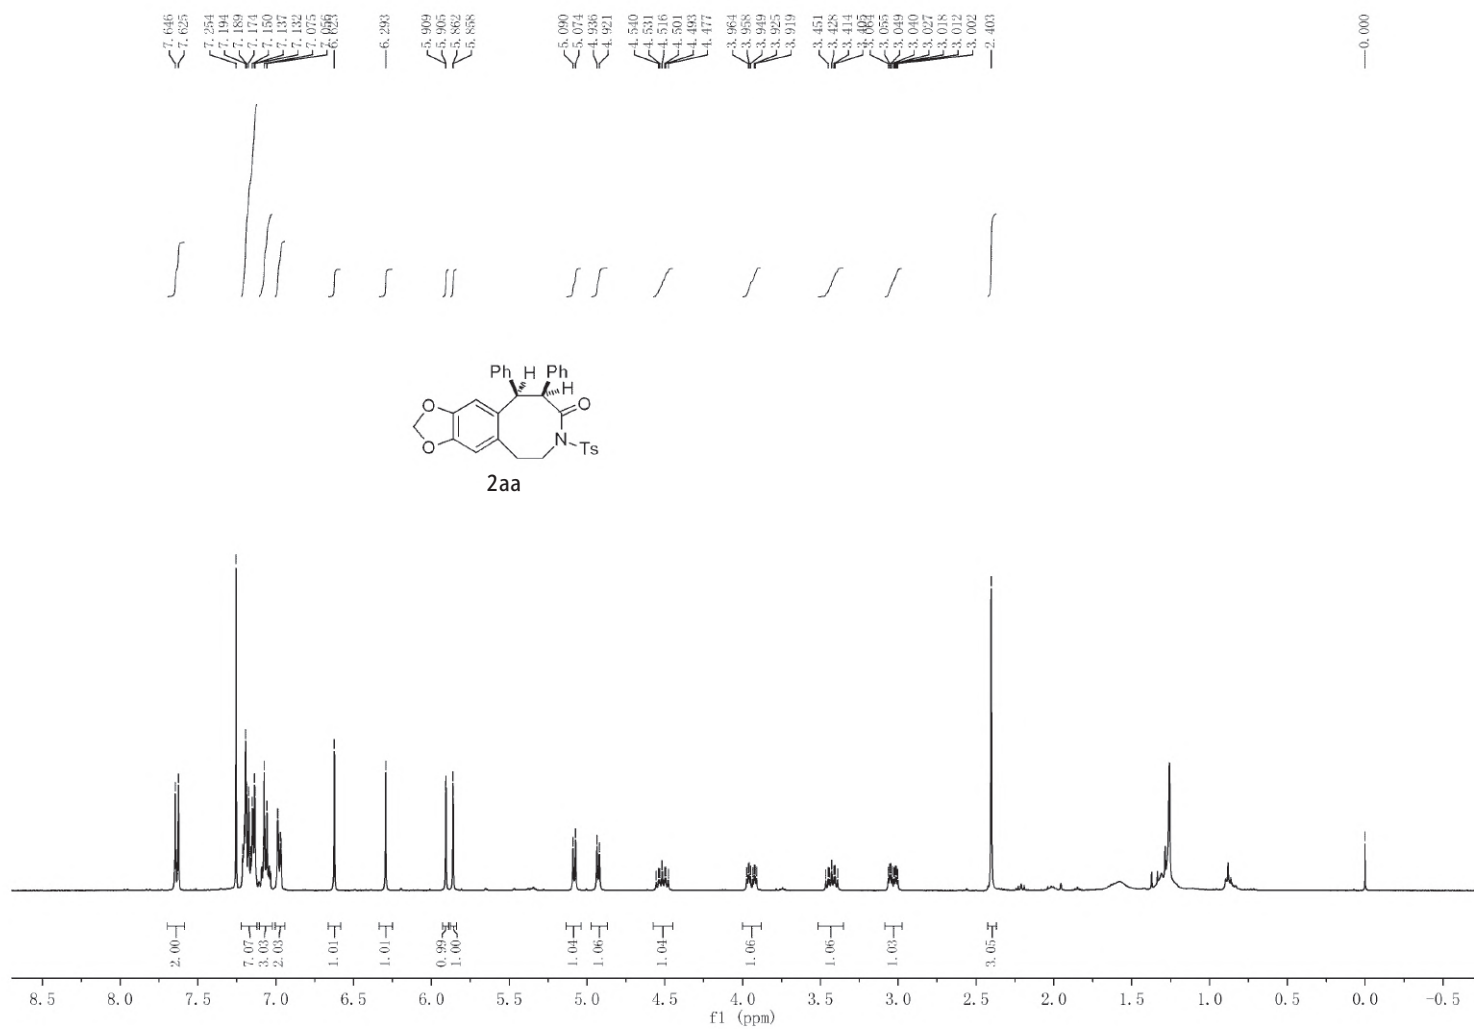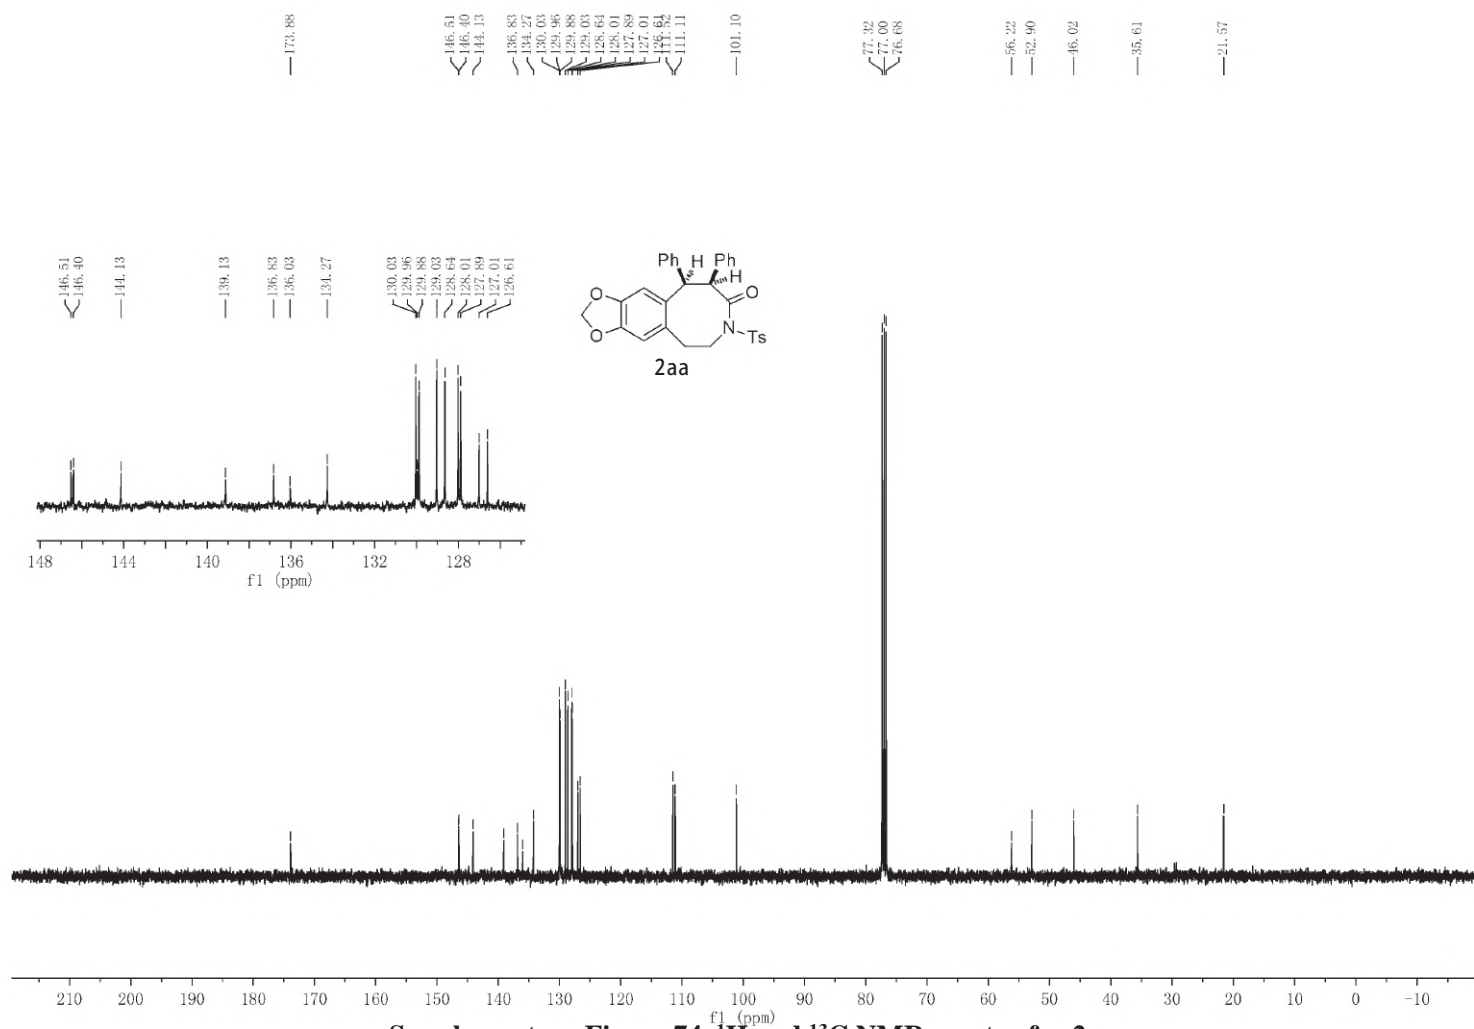

Supplementary Figure 74. <sup>1</sup>H and <sup>13</sup>C NMR spectra for 2aa

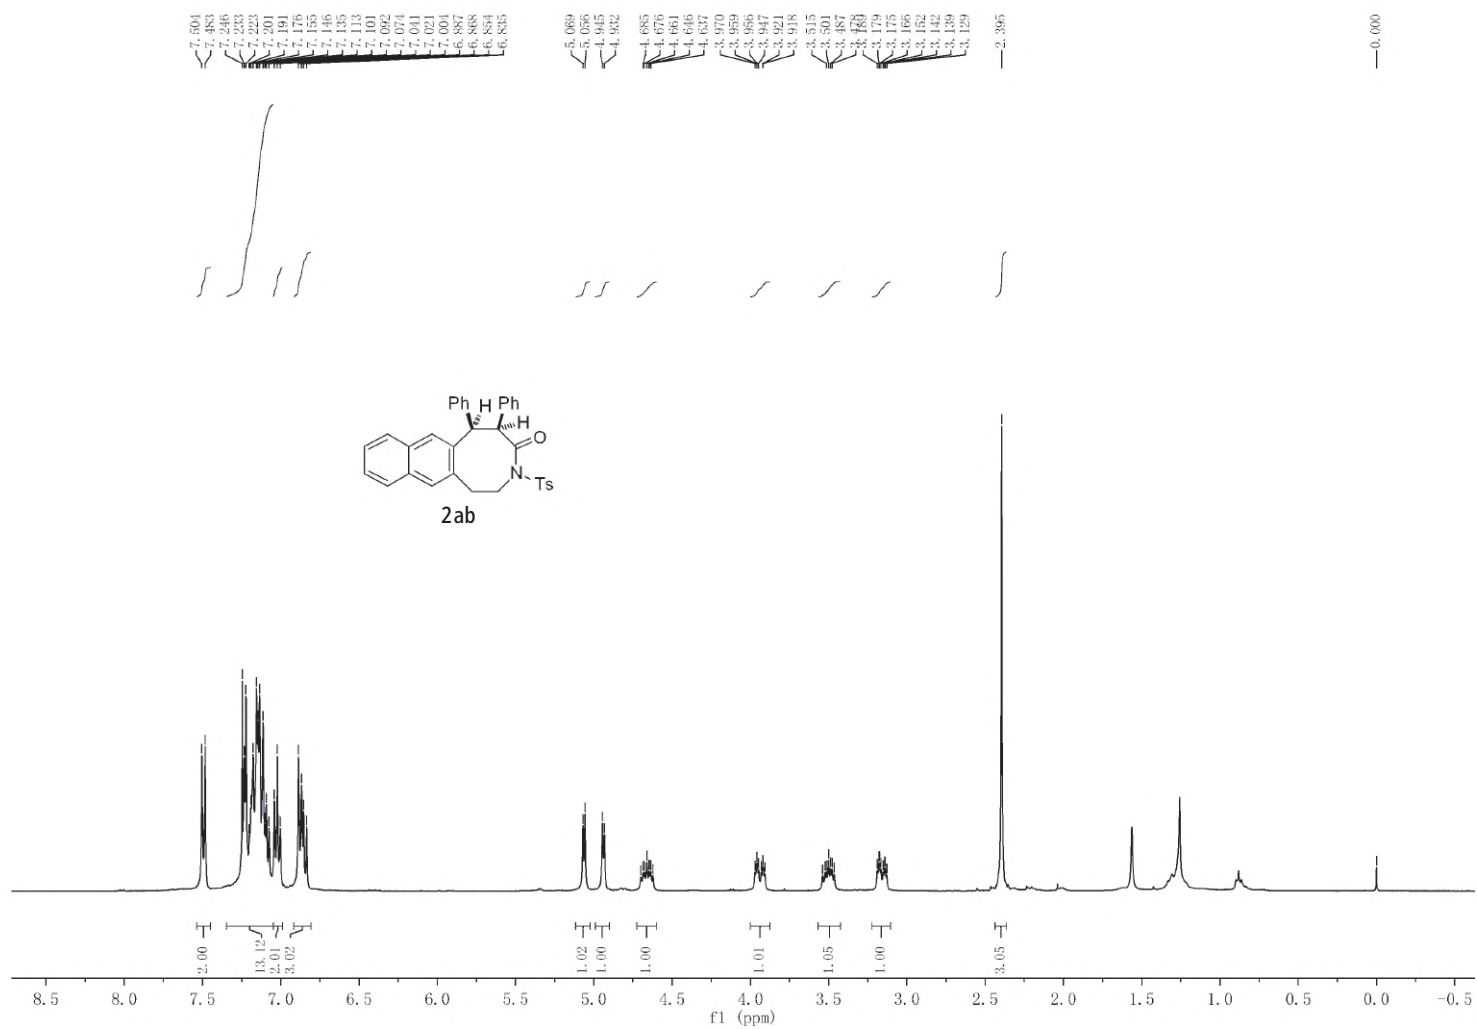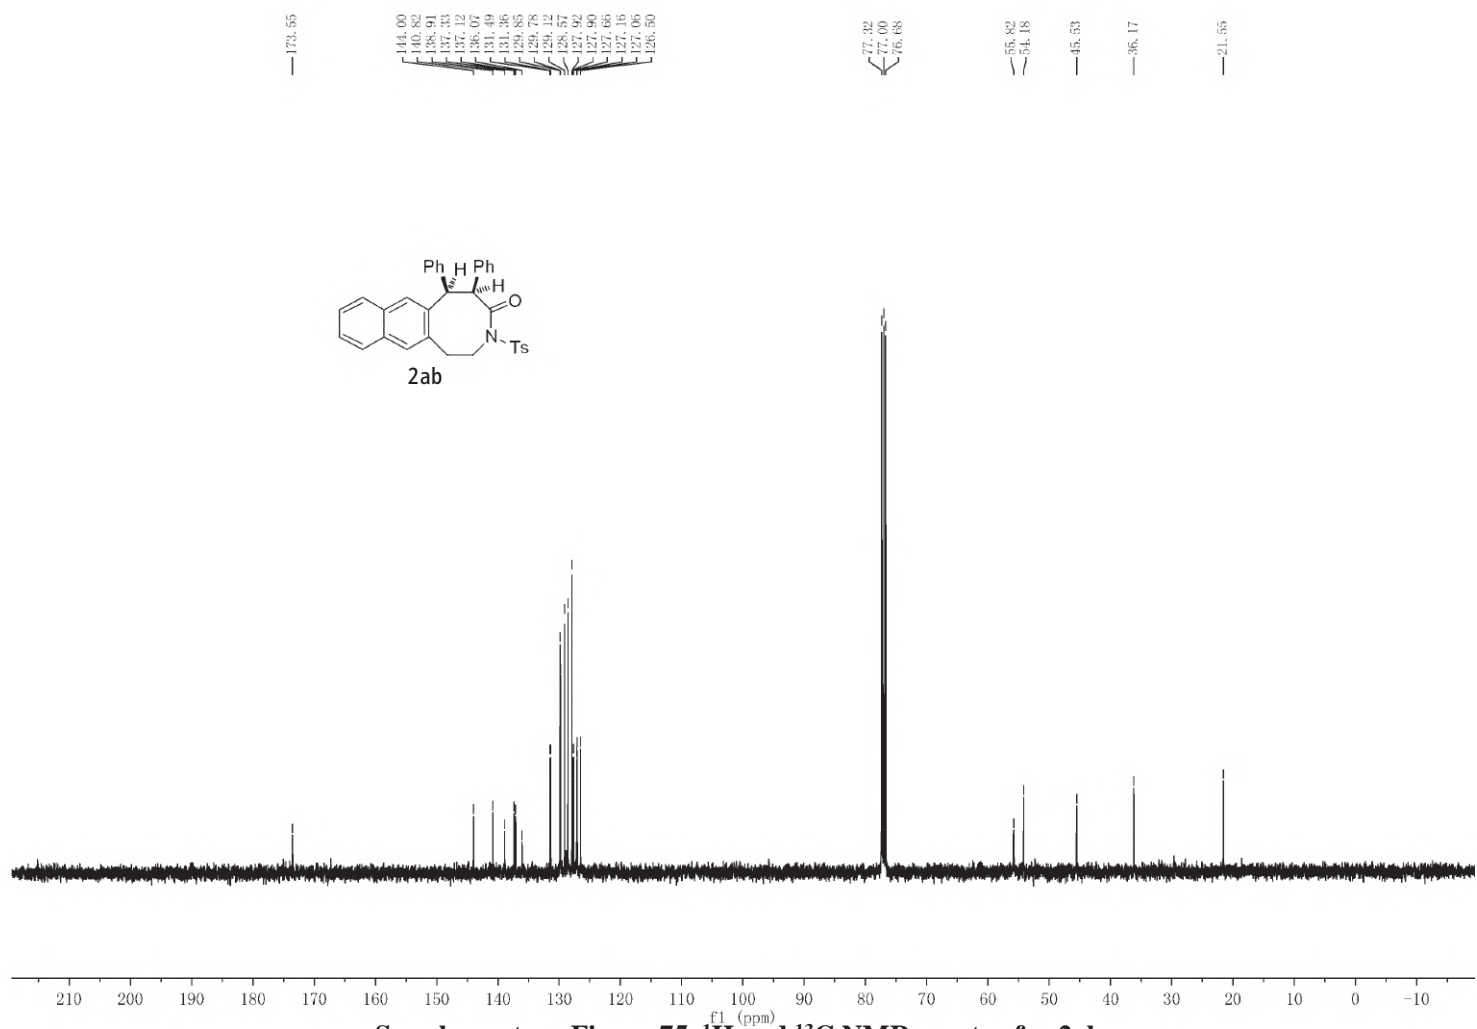

Supplementary Figure 75. <sup>1</sup>H and <sup>13</sup>C NMR spectra for **2ab**

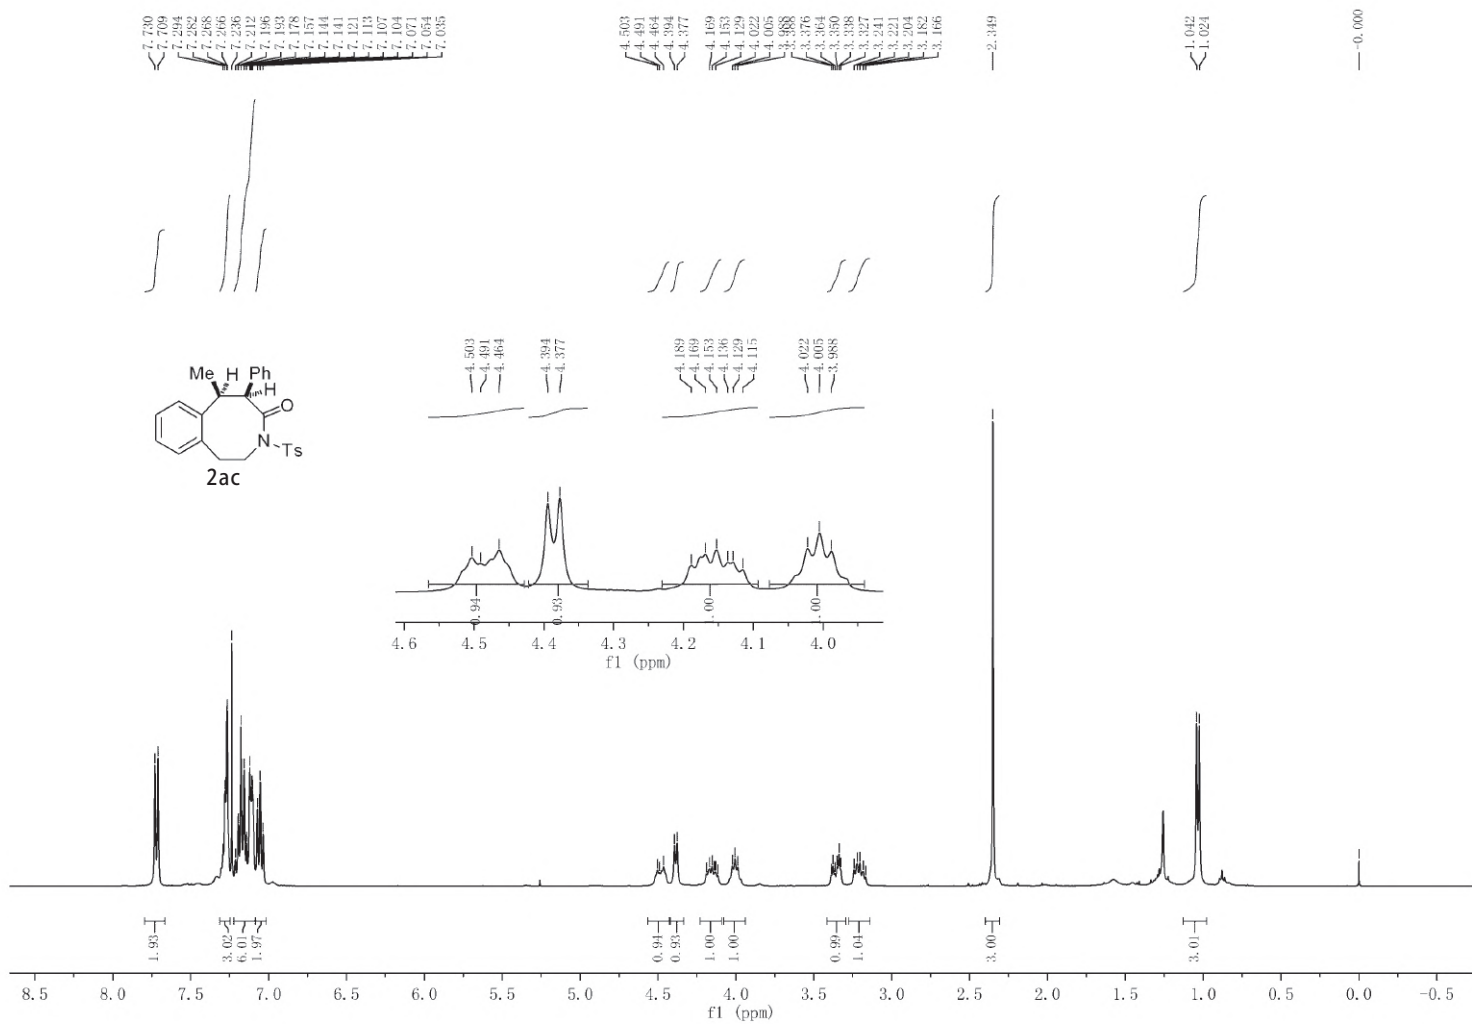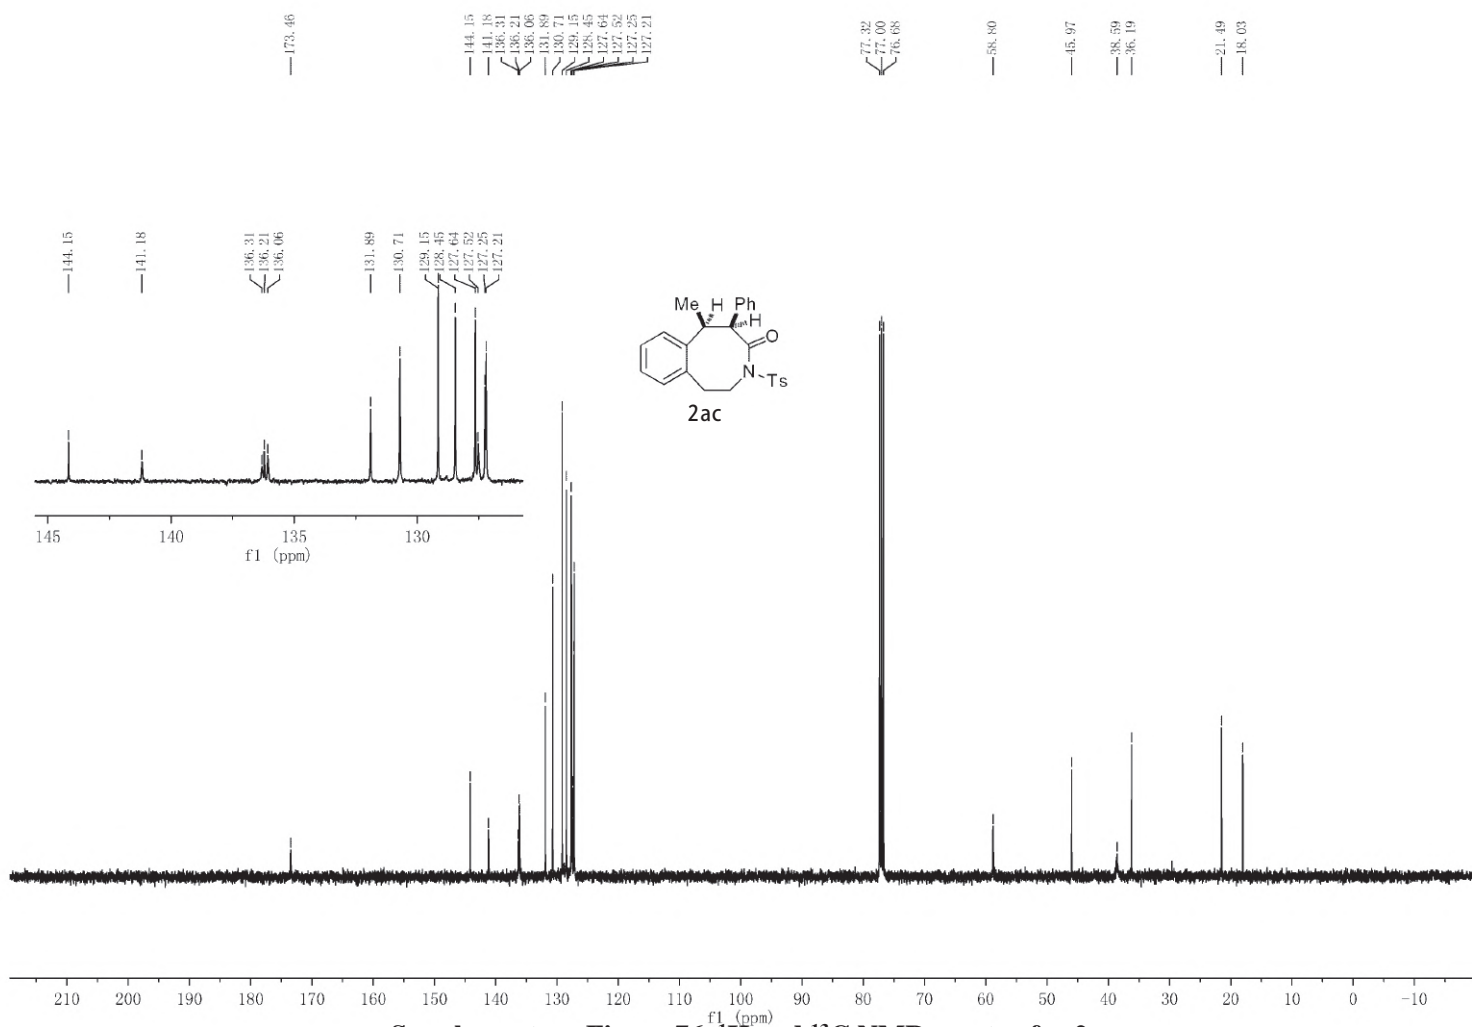

Supplementary Figure 76. <sup>1</sup>H and <sup>13</sup>C NMR spectra for 2ac

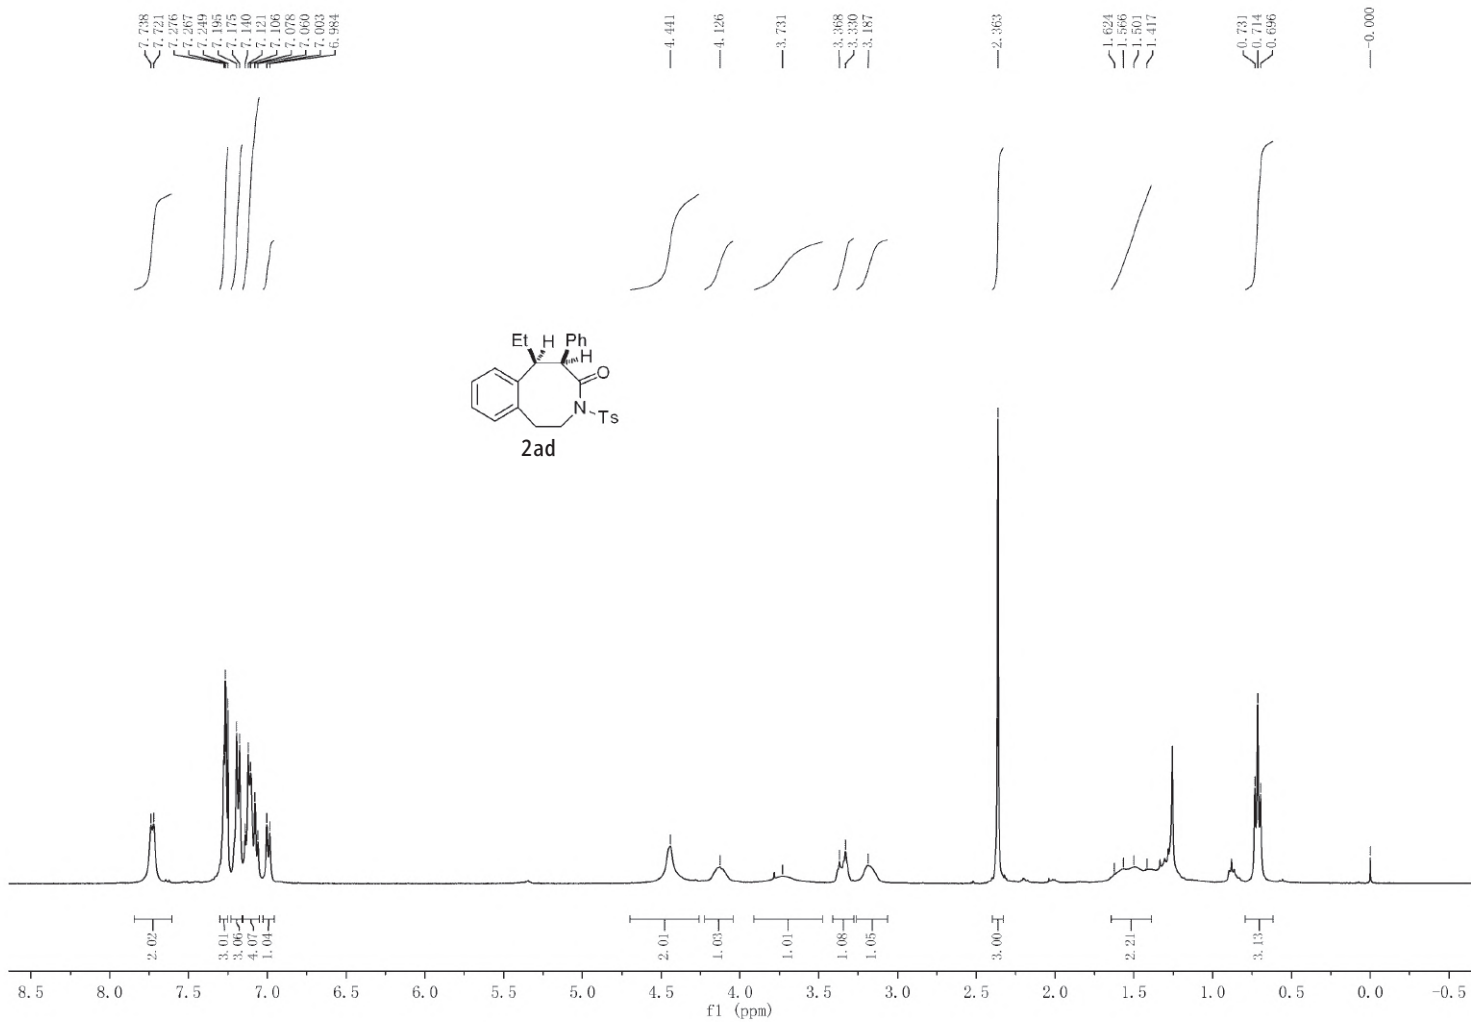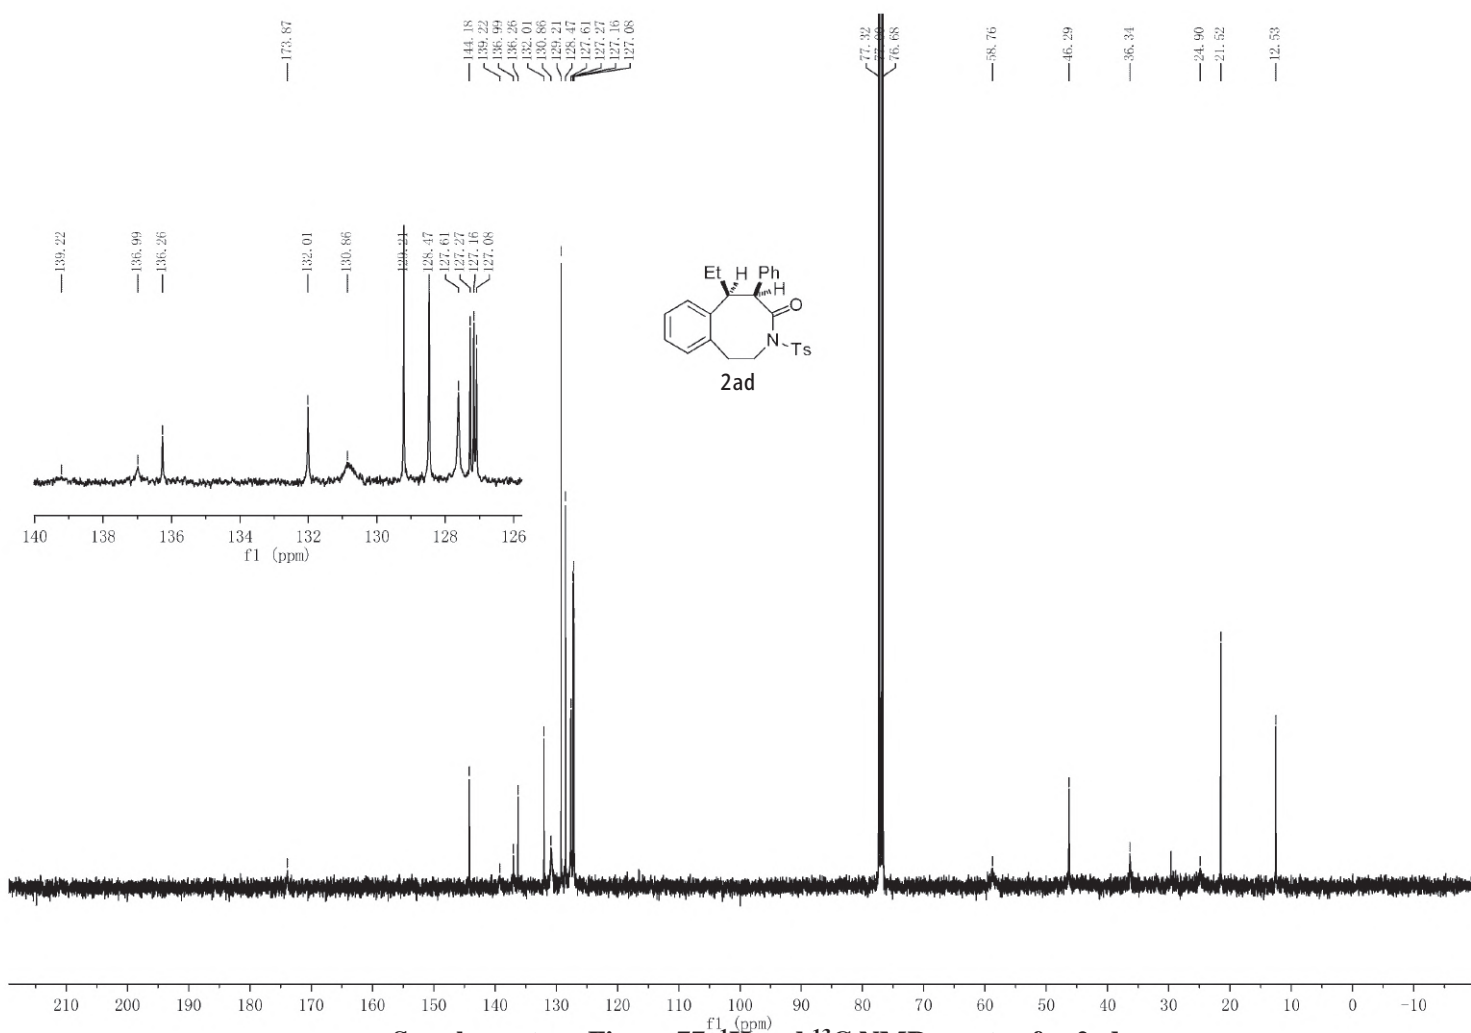

Supplementary Figure 77. <sup>1</sup>H and <sup>13</sup>C NMR spectra for 2ad

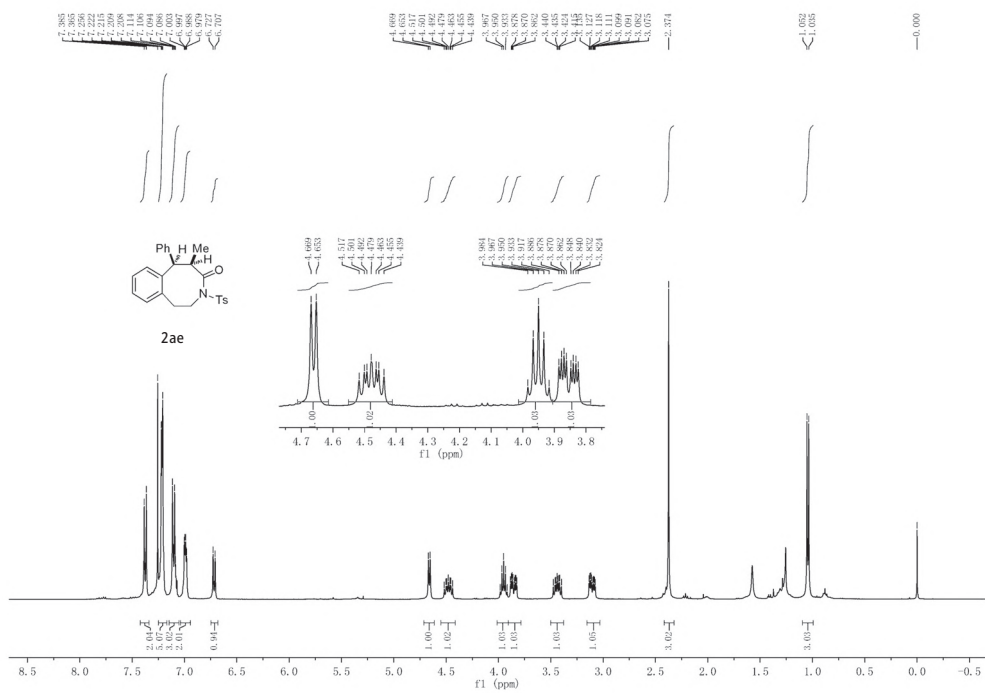





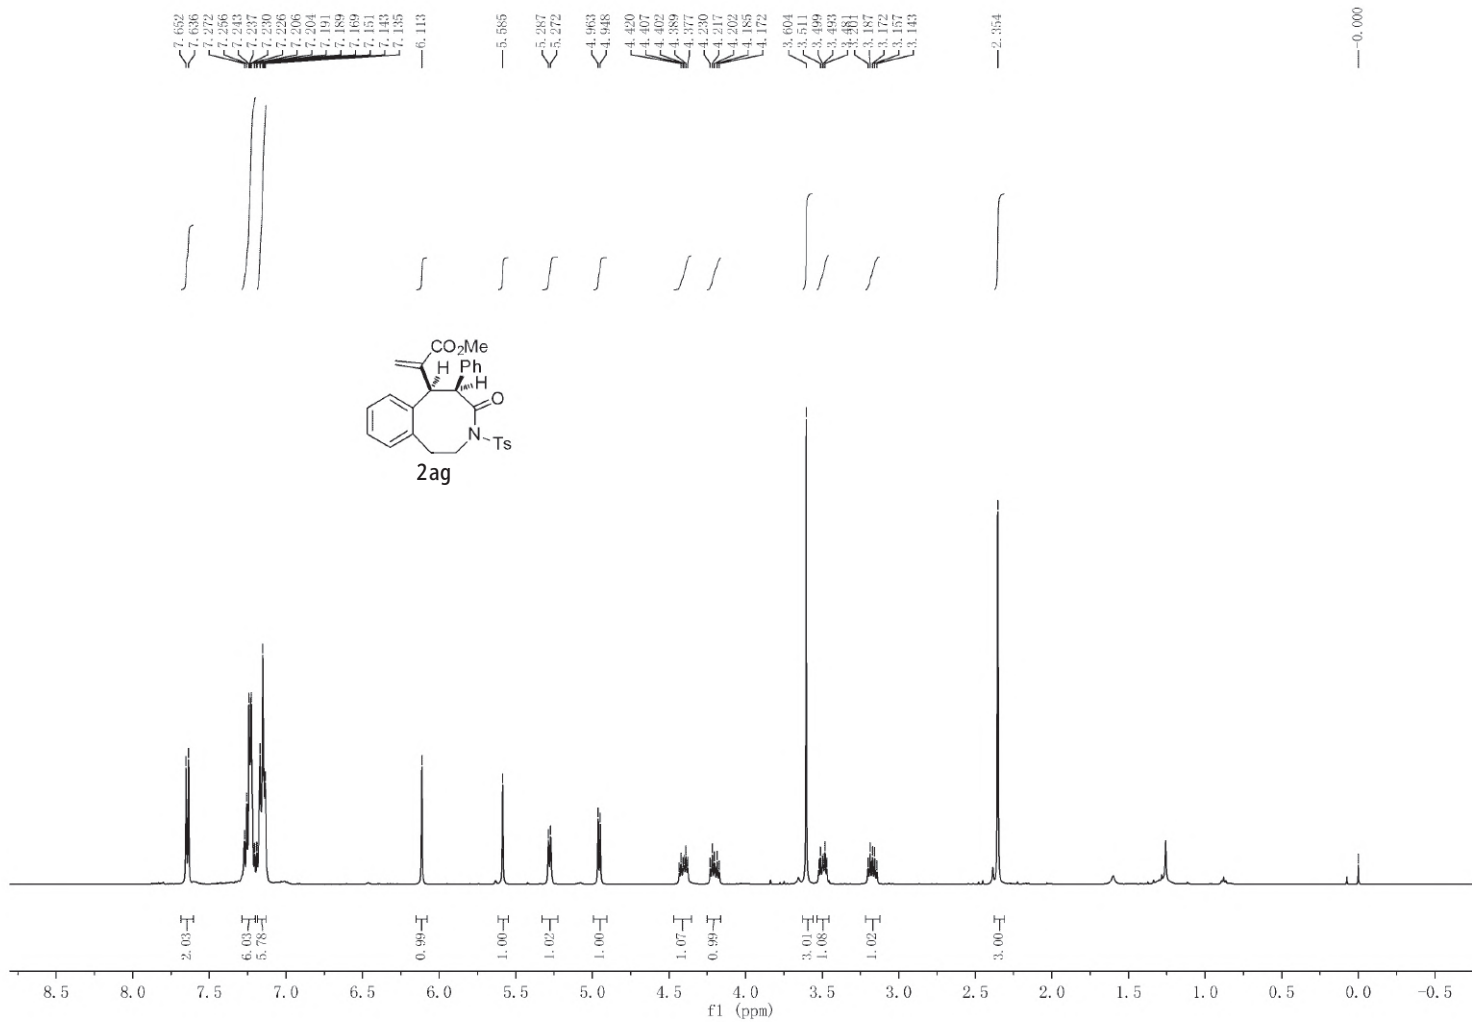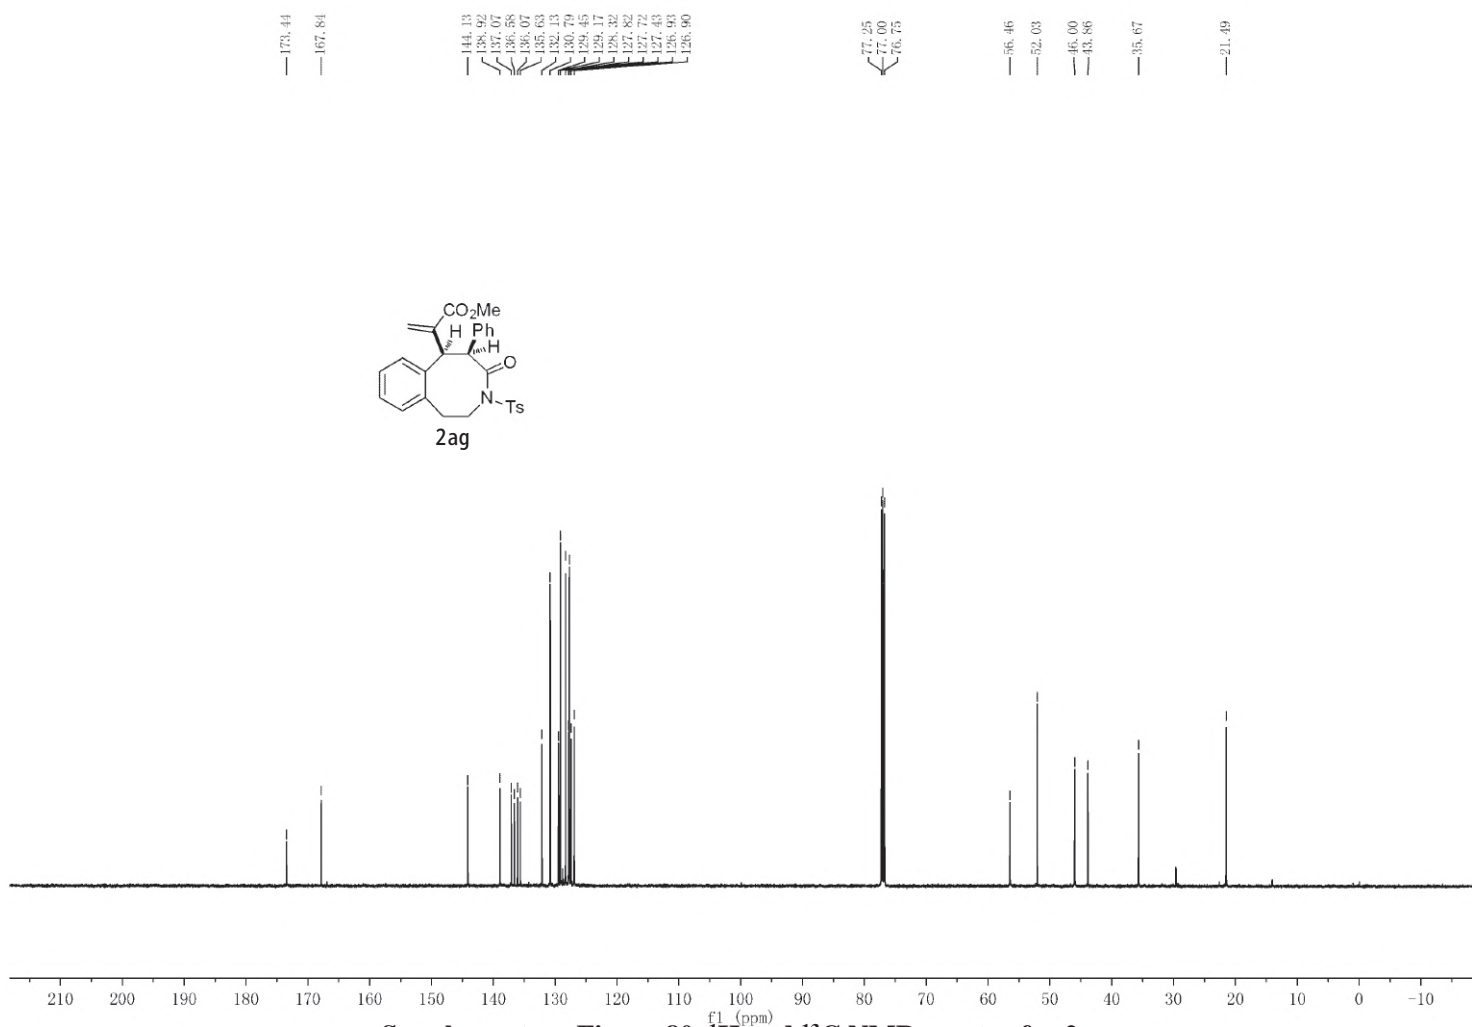

Supplementary Figure 80. <sup>1</sup>H and <sup>13</sup>C NMR spectra for **2ag**

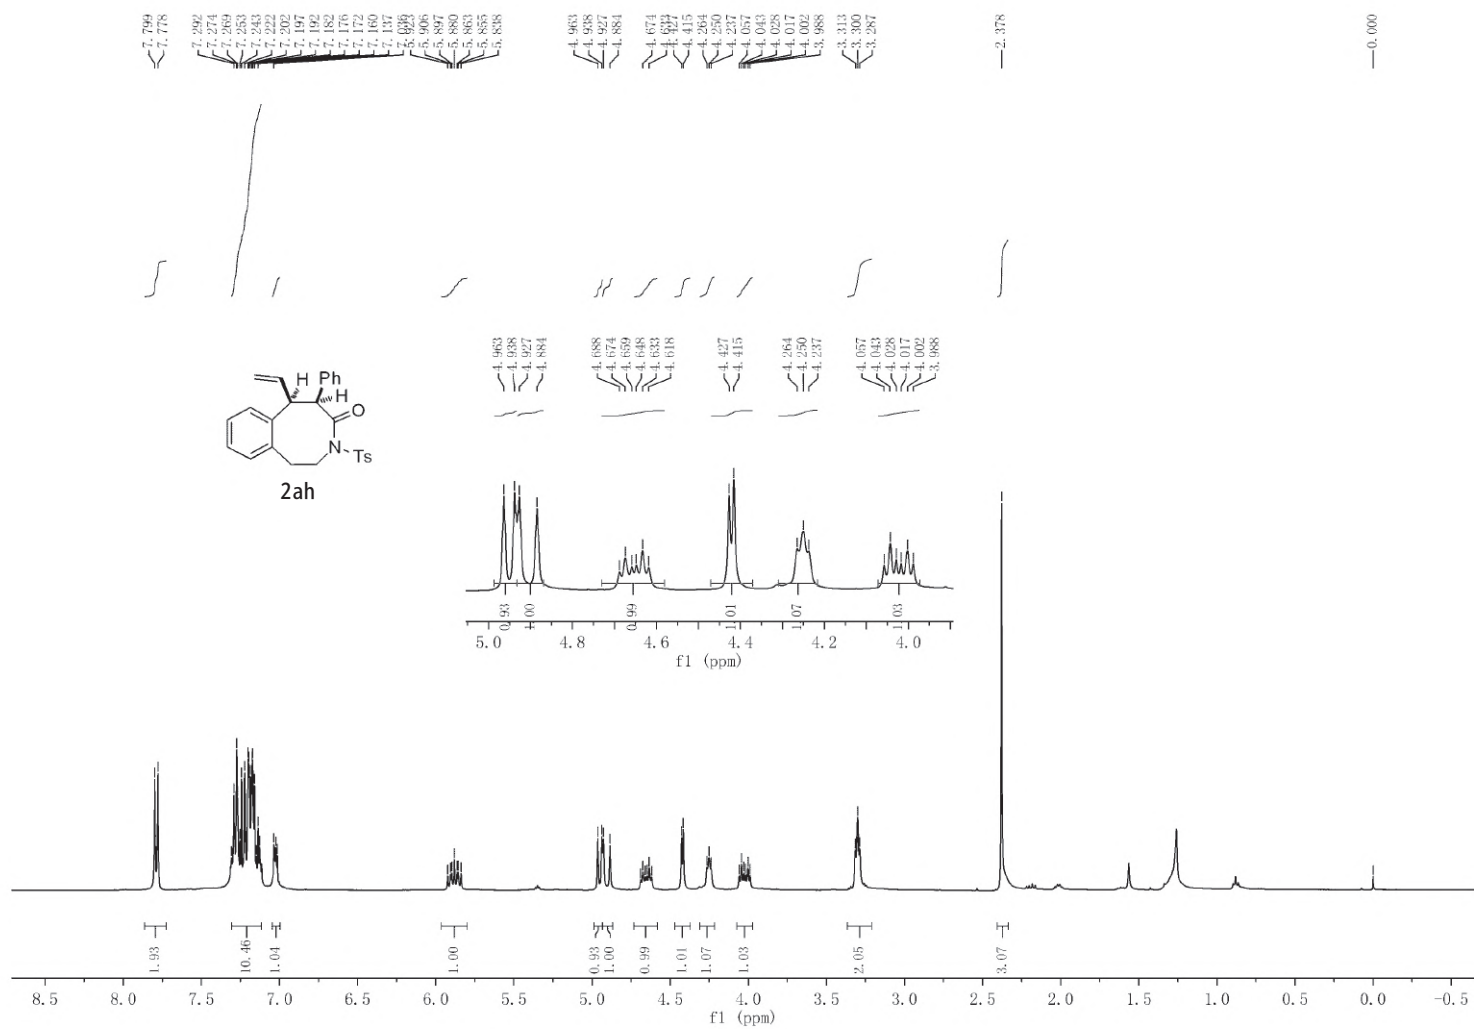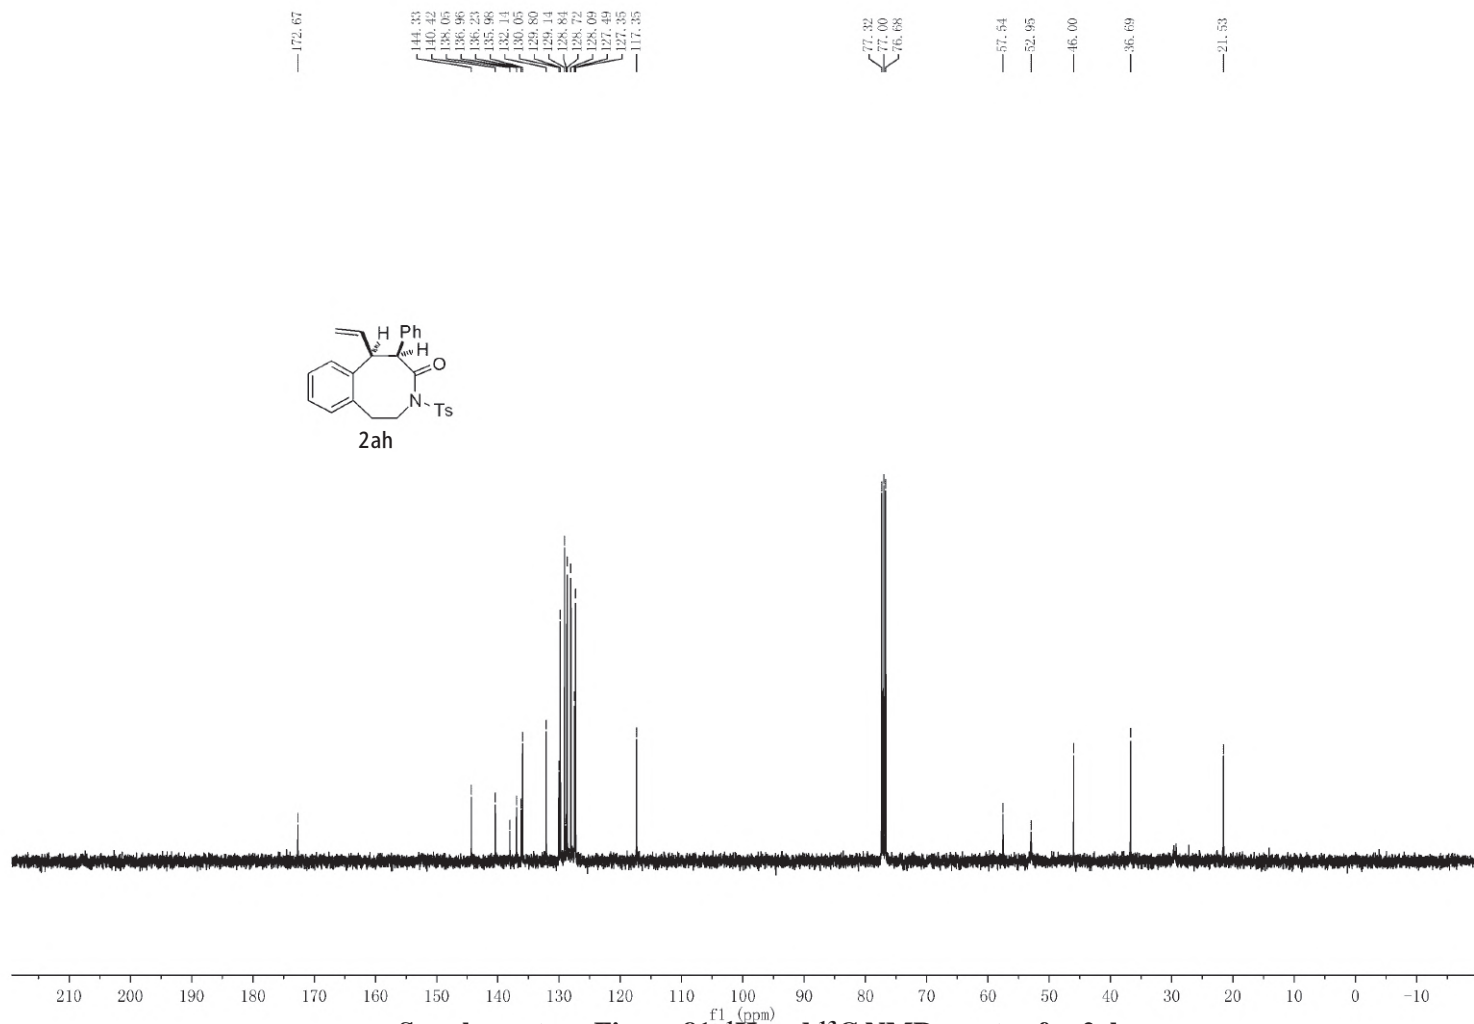

Supplementary Figure 81. <sup>1</sup>H and <sup>13</sup>C NMR spectra for 2ah

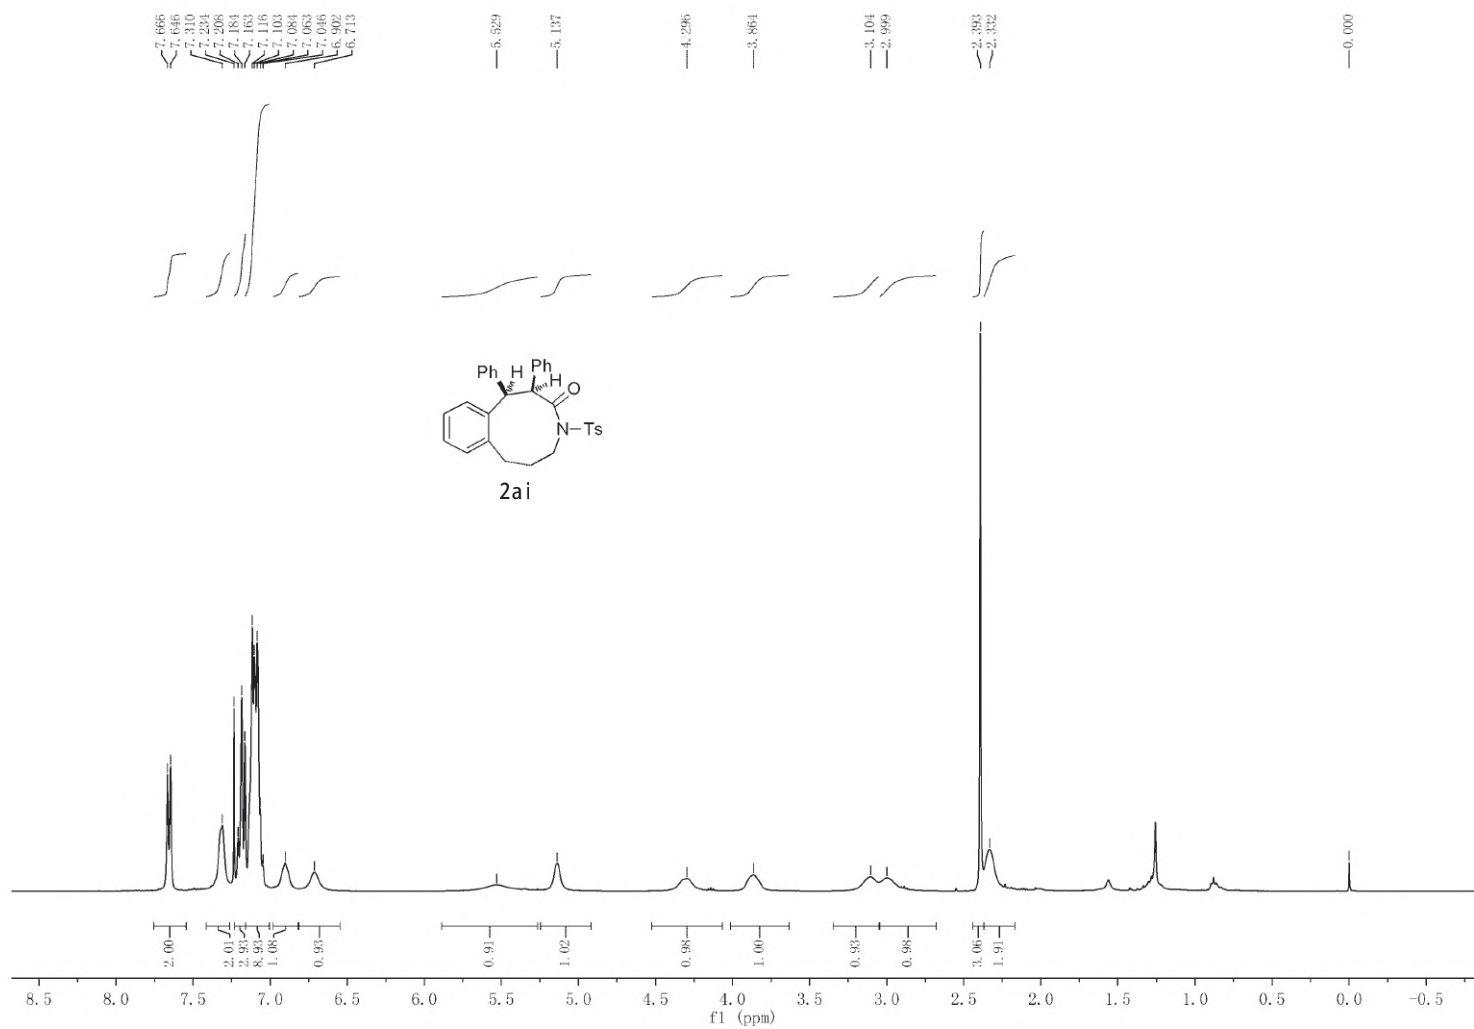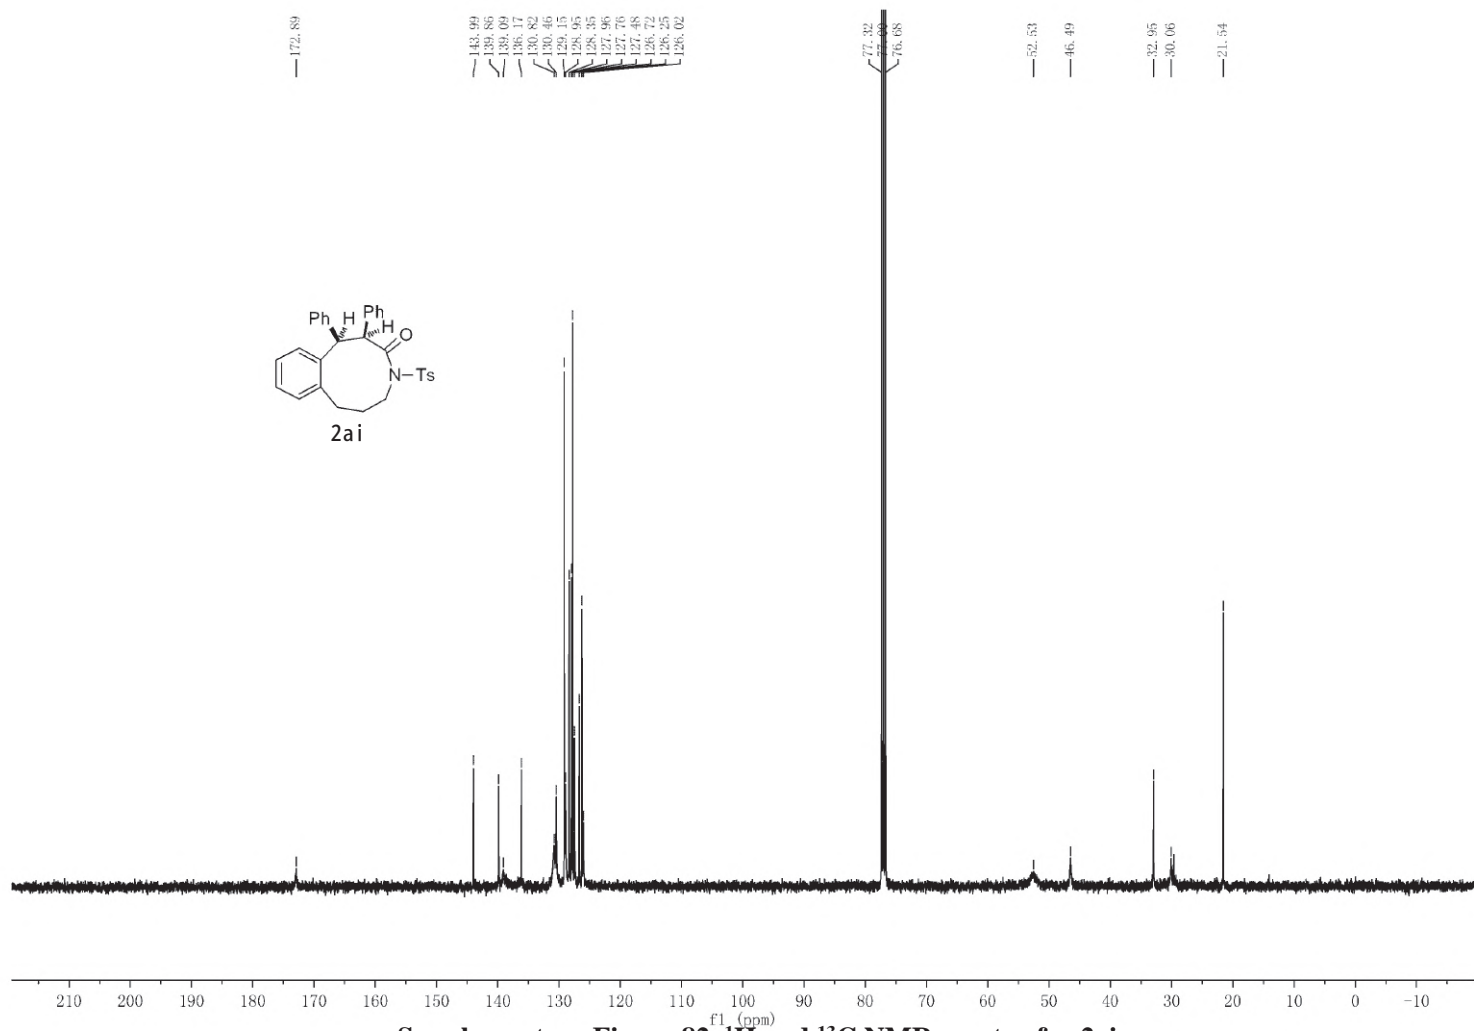

Supplementary Figure 82. <sup>1</sup>H and <sup>13</sup>C NMR spectra for 2ai

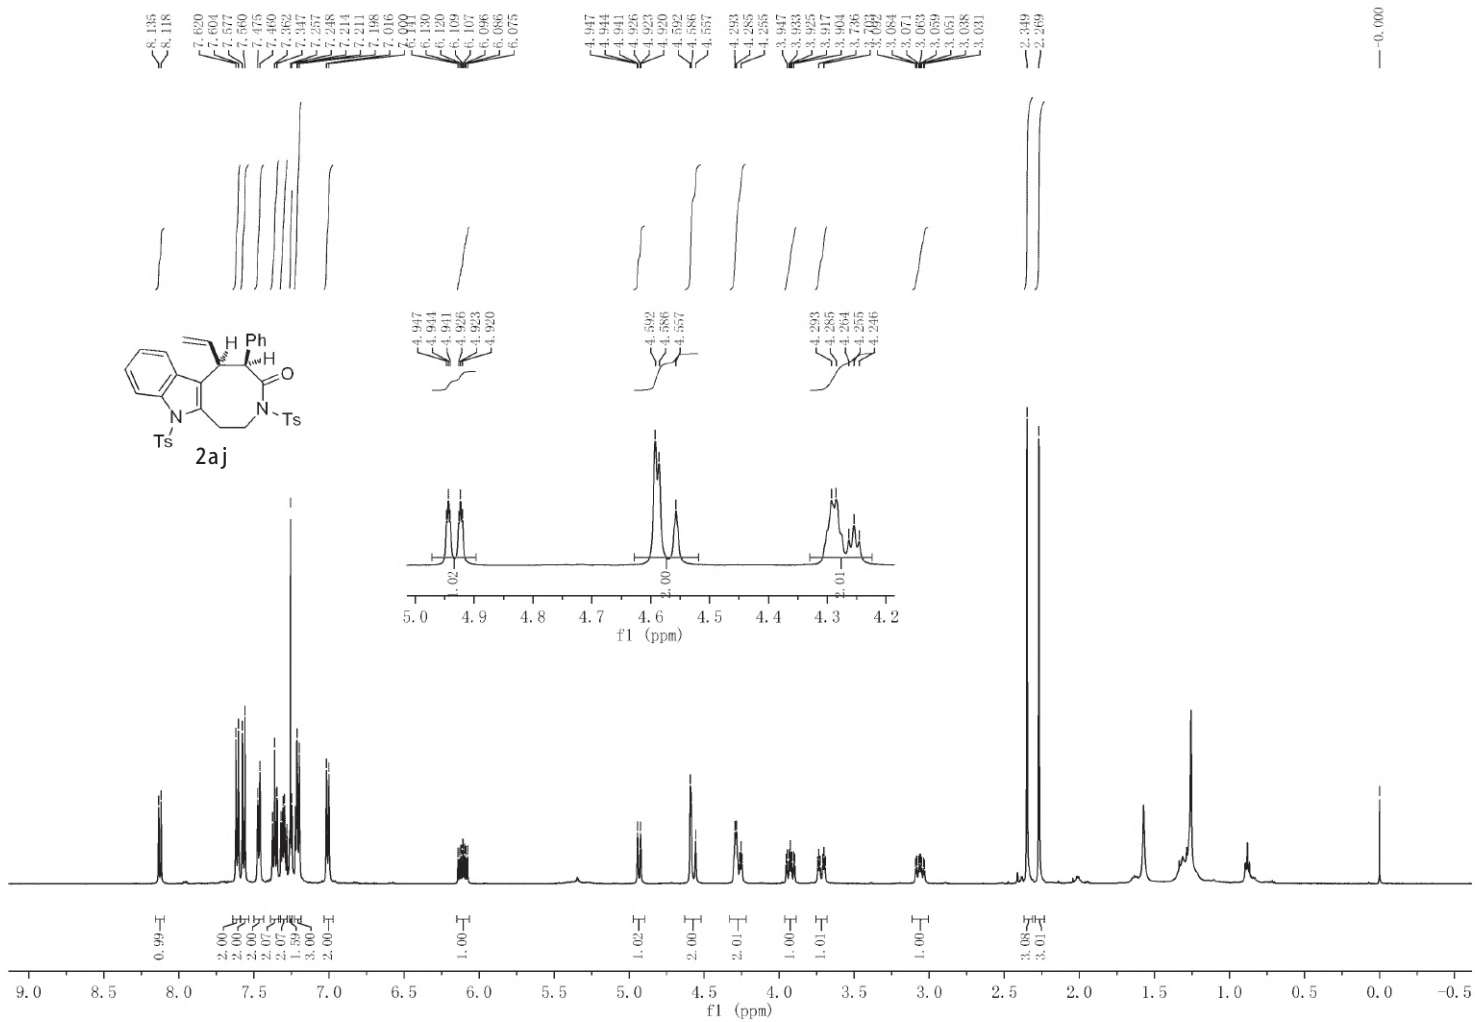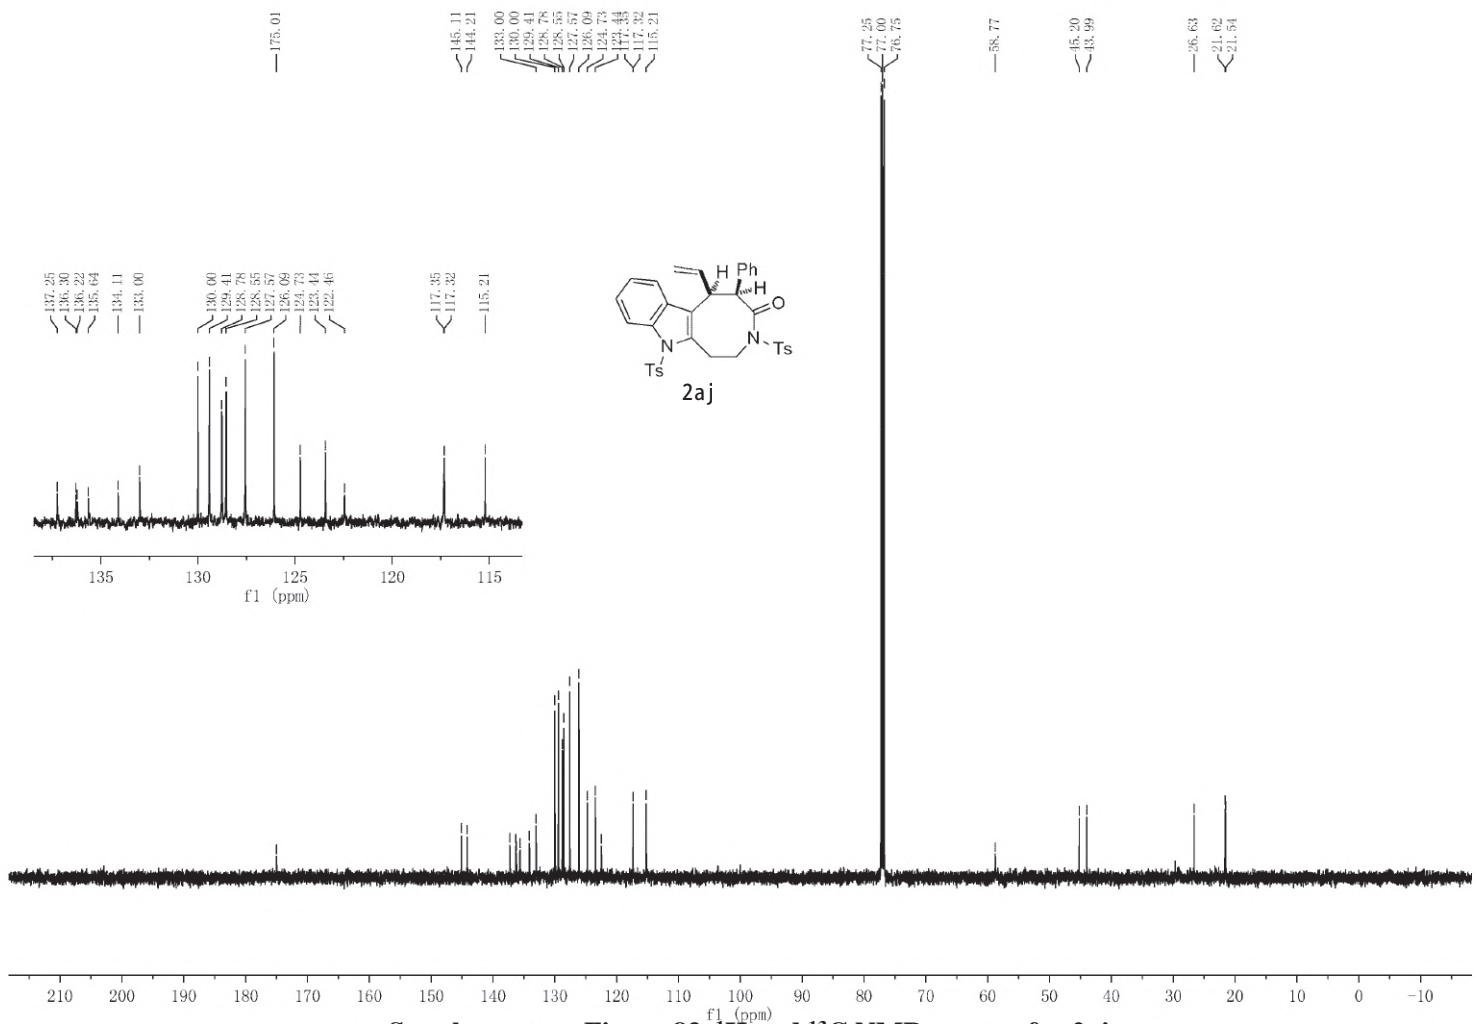

Supplementary Figure 83. <sup>1</sup>H and <sup>13</sup>C NMR spectra for 2aj





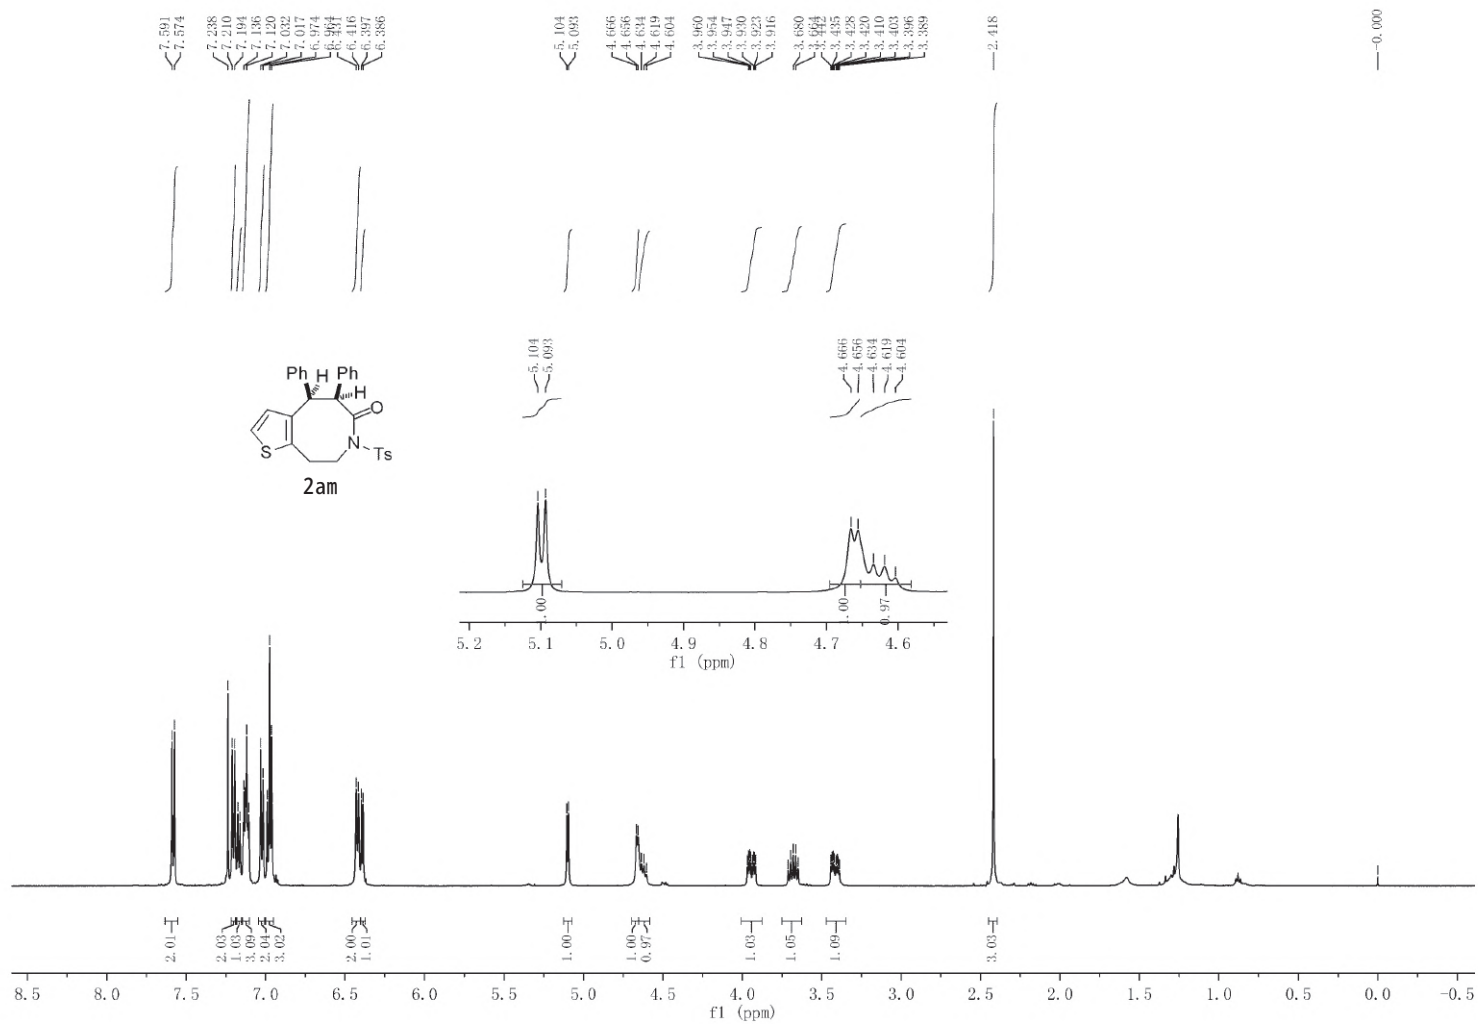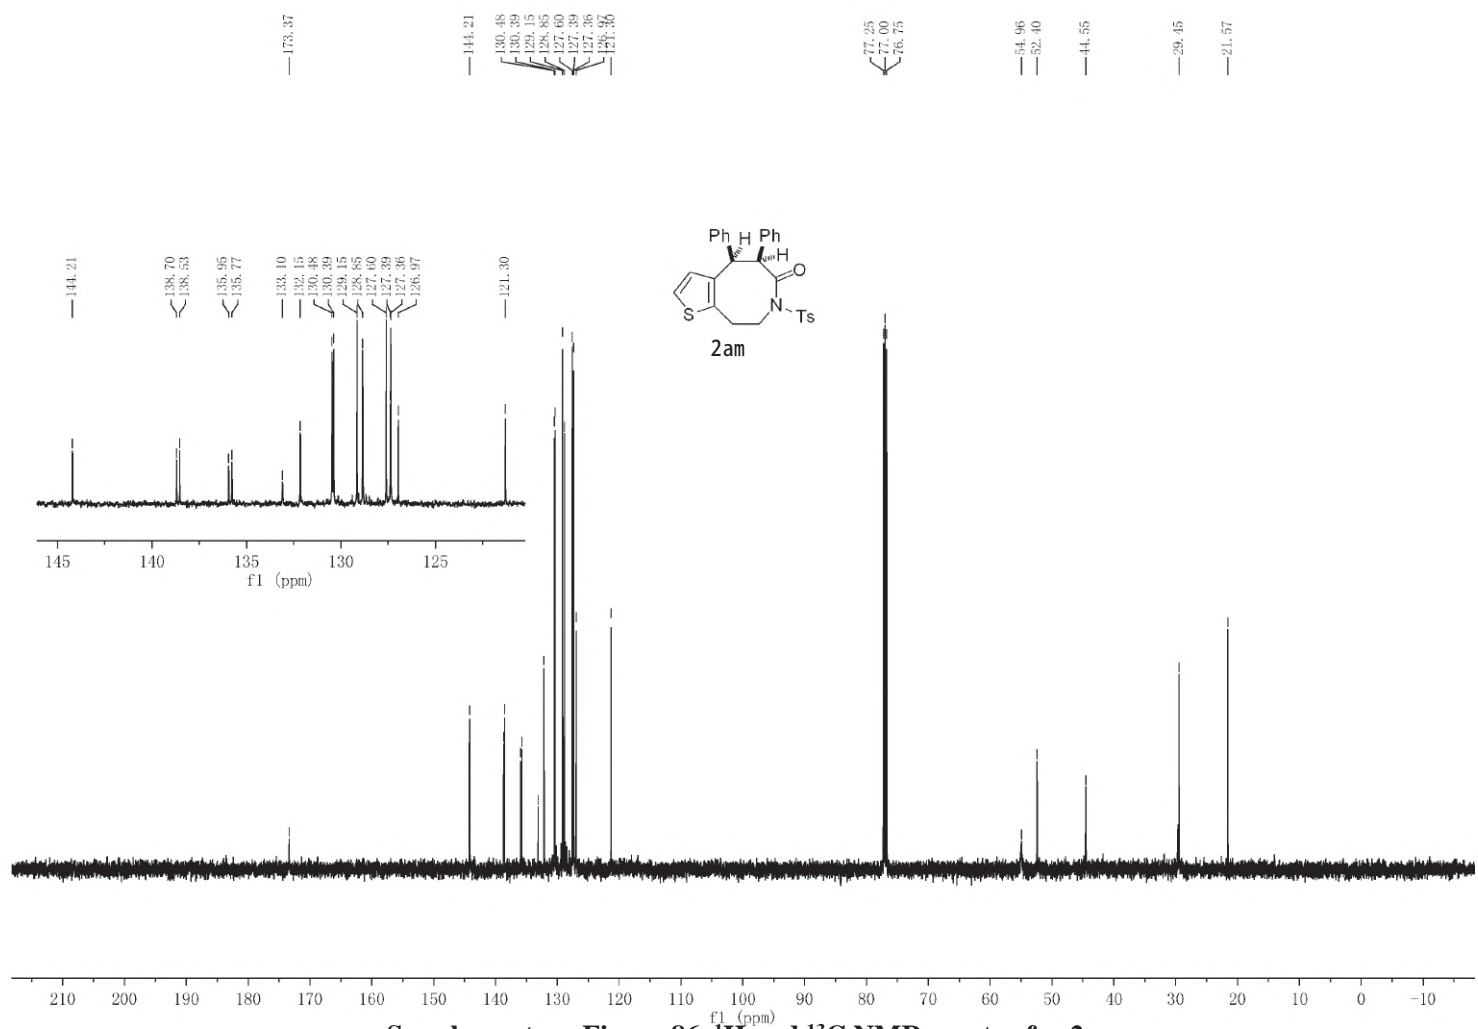

Supplementary Figure 86. <sup>1</sup>H and <sup>13</sup>C NMR spectra for 2am





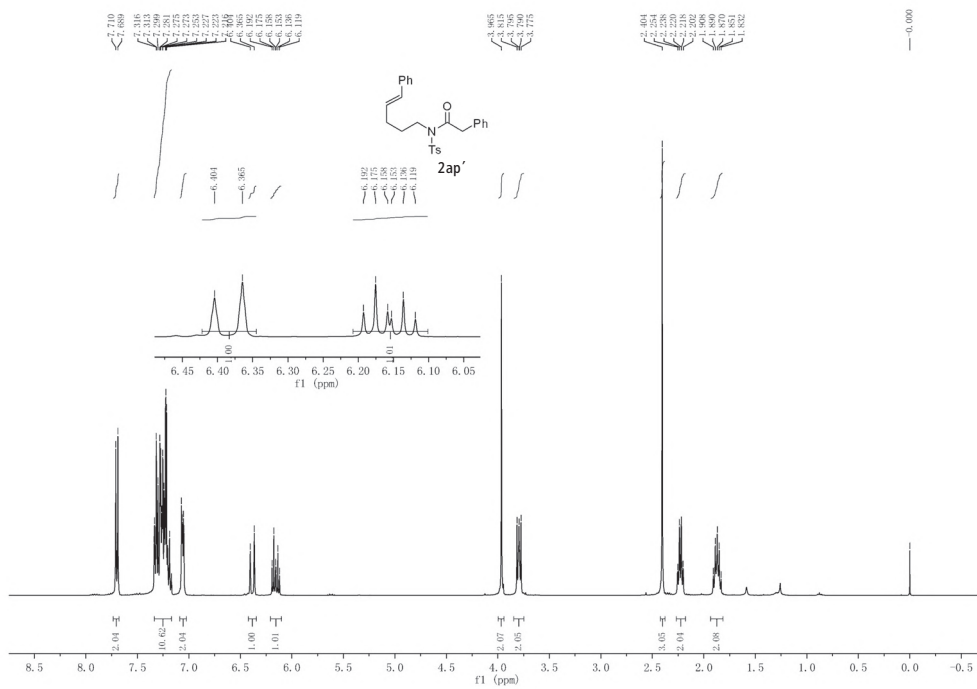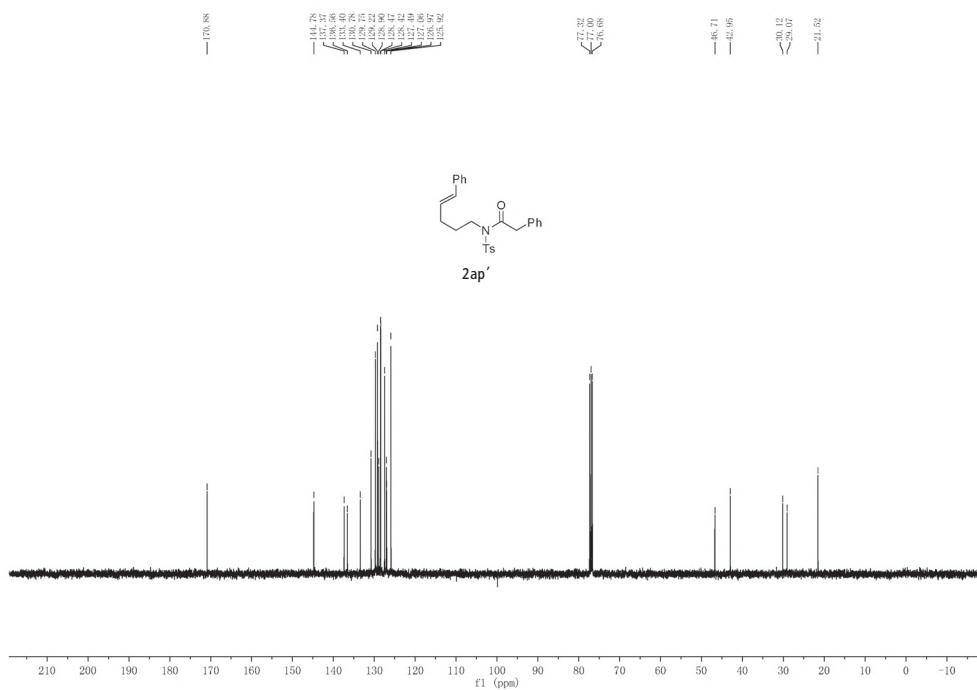

















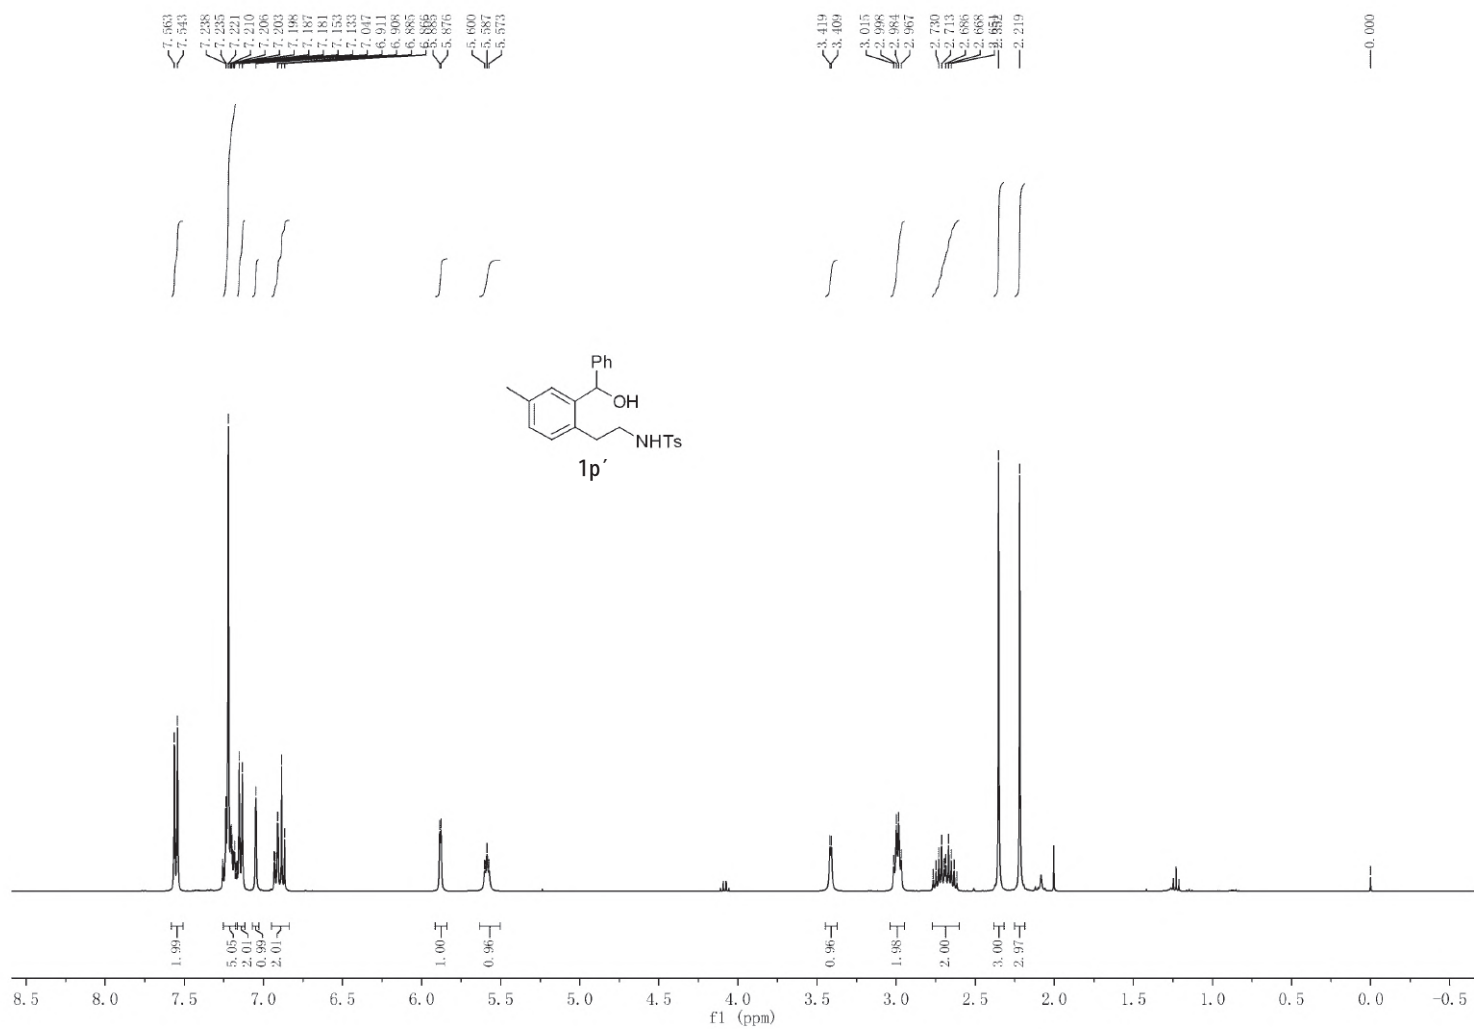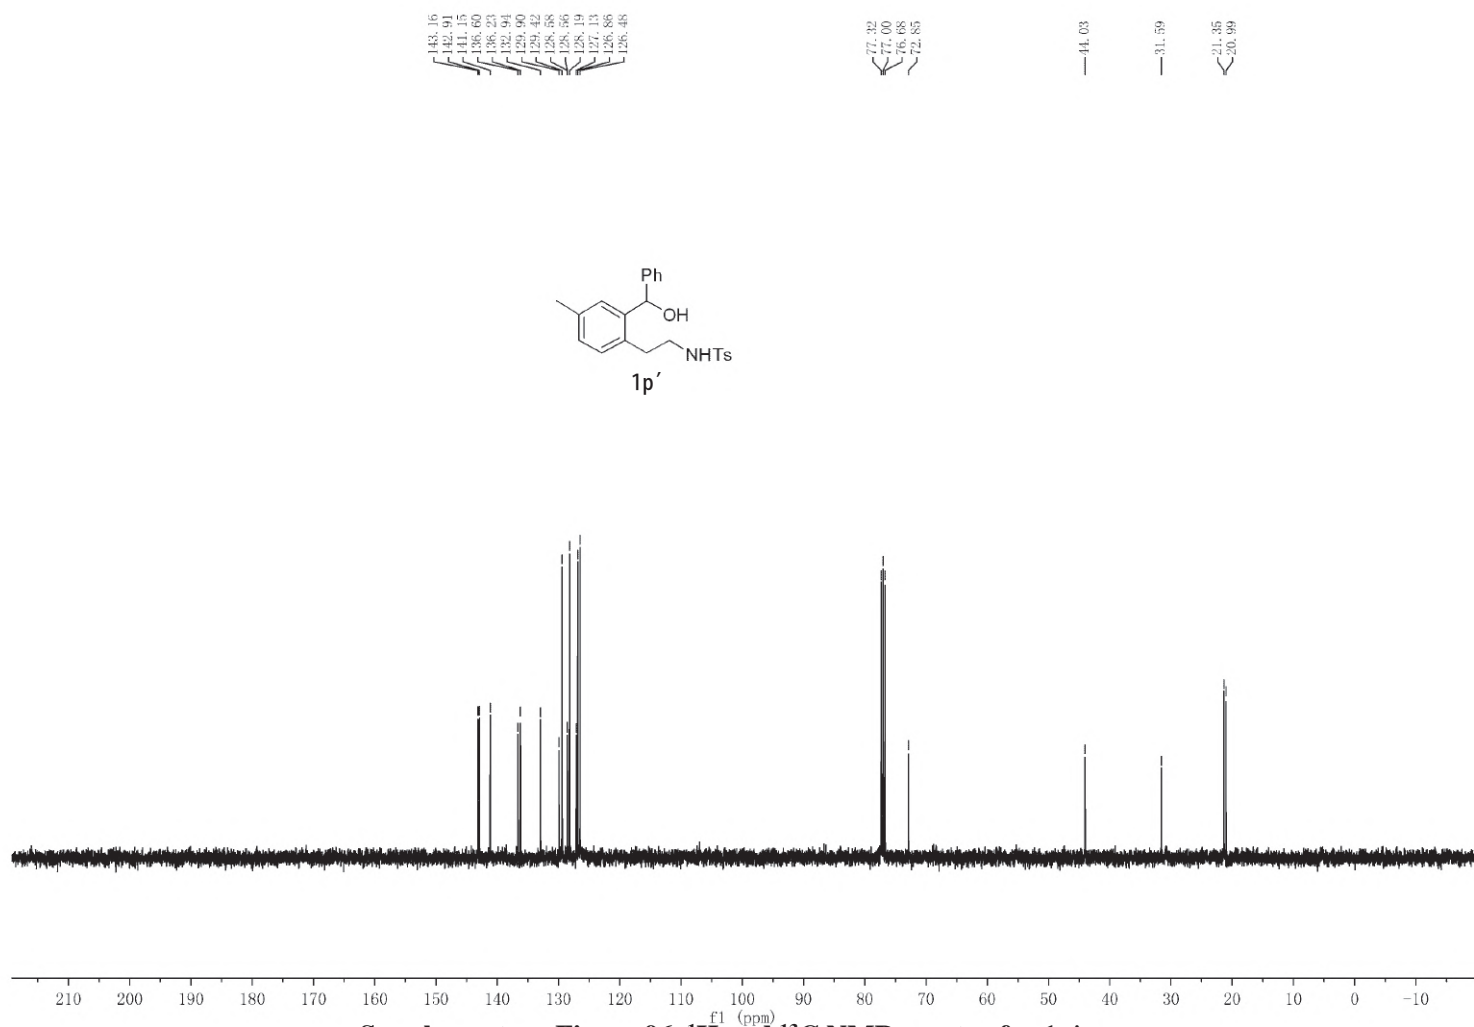

Supplementary Figure 96. <sup>1</sup>H and <sup>13</sup>C NMR spectra for **1p'**

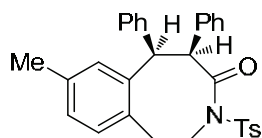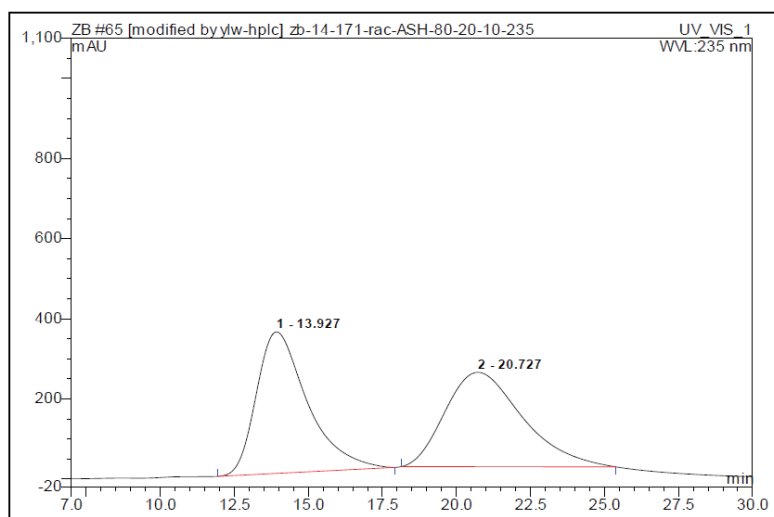

| No.           | Ret.Time<br>min | Peak Name | Height<br>mAU | Area<br>mAU*min | Rel.Area<br>% | Amount<br>n.a. | Type |
|---------------|-----------------|-----------|---------------|-----------------|---------------|----------------|------|
| 1             | 13.93           | n.a.      | 353.050       | 704.688         | 49.70         | n.a.           | BMB* |
| 2             | 20.73           | n.a.      | 235.496       | 713.245         | 50.30         | n.a.           | BMB* |
| <b>Total:</b> |                 |           | 588.546       | 1417.933        | 100.00        | 0.000          |      |

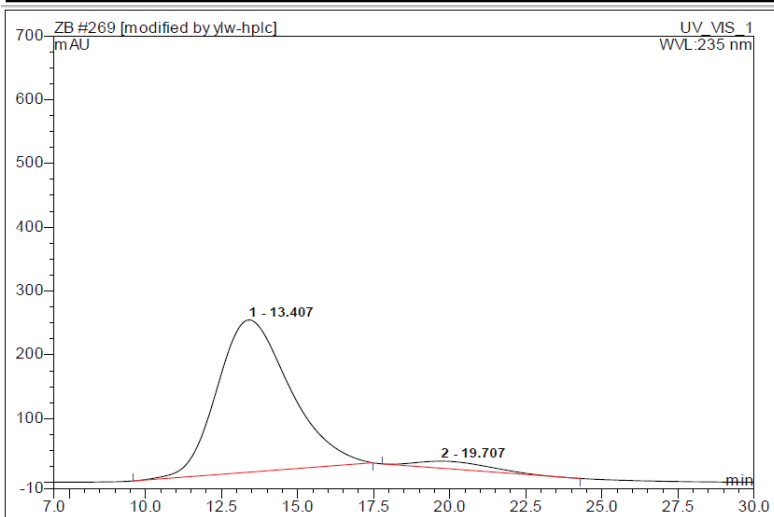

| No.           | Ret.Time<br>min | Peak Name | Height<br>mAU | Area<br>mAU*min | Rel.Area<br>% | Amount<br>n.a. | Type |
|---------------|-----------------|-----------|---------------|-----------------|---------------|----------------|------|
| 1             | 13.41           | n.a.      | 238.562       | 664.657         | 95.39         | n.a.           | BMB* |
| 2             | 19.71           | n.a.      | 11.018        | 32.114          | 4.61          | n.a.           | BMB* |
| <b>Total:</b> |                 |           | 249.580       | 696.771         | 100.00        | 0.000          |      |

Supplementary Figure 97. HPLC spectrum for compound 2p-ent

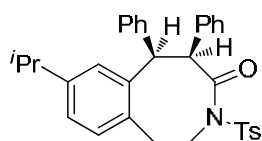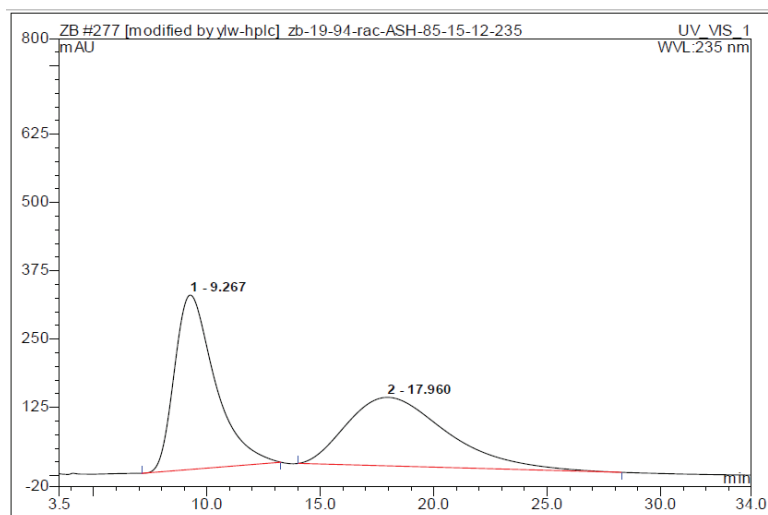

| No.           | Ret.Time<br>min | Peak Name | Height<br>mAU  | Area<br>mAU*min | Rel.Area<br>% | Amount<br>n.a. | Type |
|---------------|-----------------|-----------|----------------|-----------------|---------------|----------------|------|
| 1             | 9.27            | n.a.      | 319.115        | 663.684         | 50.83         | n.a.           | BMB* |
| 2             | 17.96           | n.a.      | 125.339        | 641.957         | 49.17         | n.a.           | BMB* |
| <b>Total:</b> |                 |           | <b>444.455</b> | <b>1305.641</b> | <b>100.00</b> | <b>0.000</b>   |      |

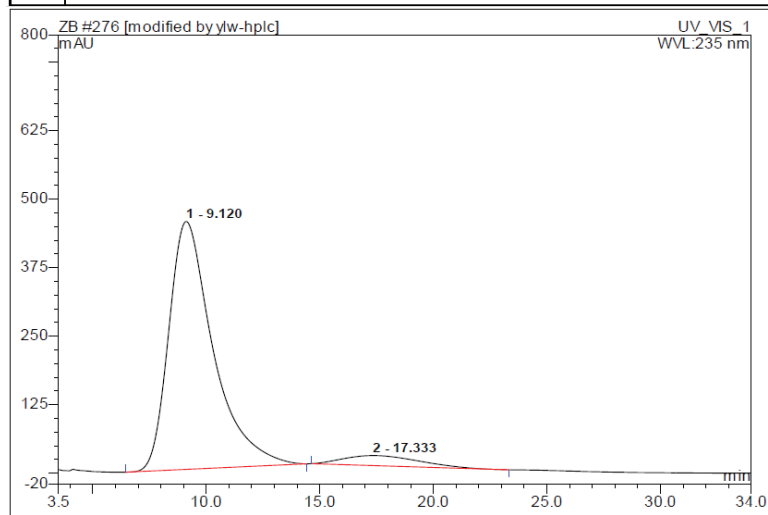

| No.           | Ret.Time<br>min | Peak Name | Height<br>mAU  | Area<br>mAU*min | Rel.Area<br>% | Amount<br>n.a. | Type |
|---------------|-----------------|-----------|----------------|-----------------|---------------|----------------|------|
| 1             | 9.12            | n.a.      | 452.239        | 1023.860        | 93.51         | n.a.           | BMB* |
| 2             | 17.33           | n.a.      | 18.266         | 71.011          | 6.49          | n.a.           | BMB* |
| <b>Total:</b> |                 |           | <b>470.505</b> | <b>1094.871</b> | <b>100.00</b> | <b>0.000</b>   |      |

Supplementary Figure 98. HPLC spectrum for compound 2r-ent

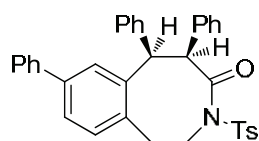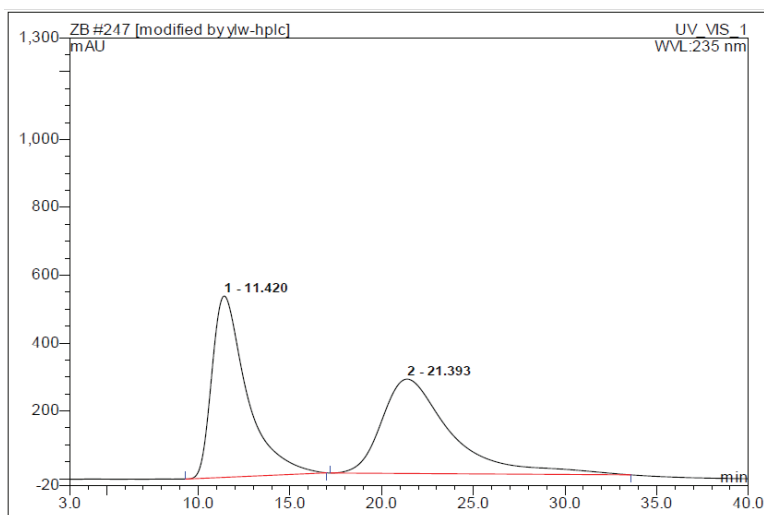

| No.           | Ret.Time<br>min | Peak Name | Height<br>mAU  | Area<br>mAU*min | Rel.Area<br>% | Amount<br>n.a. | Type |
|---------------|-----------------|-----------|----------------|-----------------|---------------|----------------|------|
| 1             | 11.42           | n.a.      | 534.200        | 1182.780        | 49.35         | n.a.           | BMB* |
| 2             | 21.39           | n.a.      | 278.088        | 1214.101        | 50.65         | n.a.           | BMB* |
| <b>Total:</b> |                 |           | <b>812.289</b> | <b>2396.881</b> | <b>100.00</b> | <b>0.000</b>   |      |

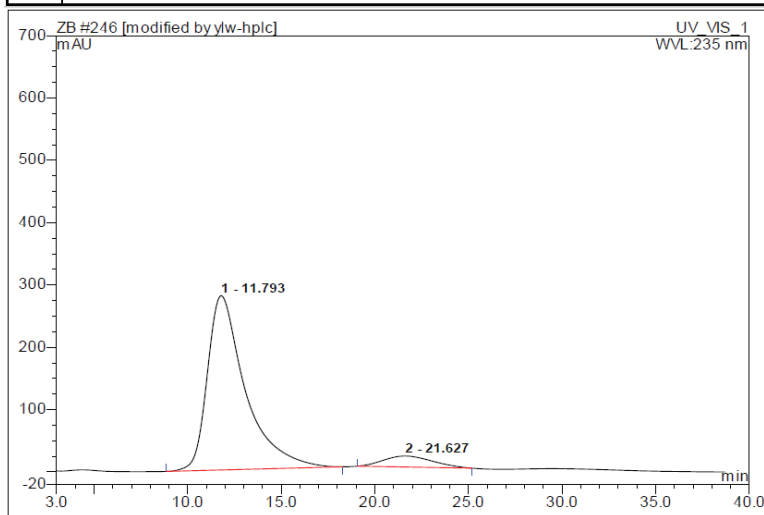

| No.           | Ret.Time<br>min | Peak Name | Height<br>mAU  | Area<br>mAU*min | Rel.Area<br>% | Amount<br>n.a. | Type |
|---------------|-----------------|-----------|----------------|-----------------|---------------|----------------|------|
| 1             | 11.79           | n.a.      | 279.579        | 657.566         | 92.50         | n.a.           | BMB* |
| 2             | 21.63           | n.a.      | 17.601         | 53.327          | 7.50          | n.a.           | BMB* |
| <b>Total:</b> |                 |           | <b>297.180</b> | <b>710.893</b>  | <b>100.00</b> | <b>0.000</b>   |      |

Supplementary Figure 99. HPLC spectrum for compound 2t-ent

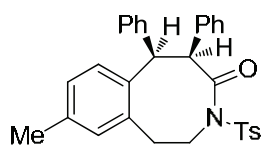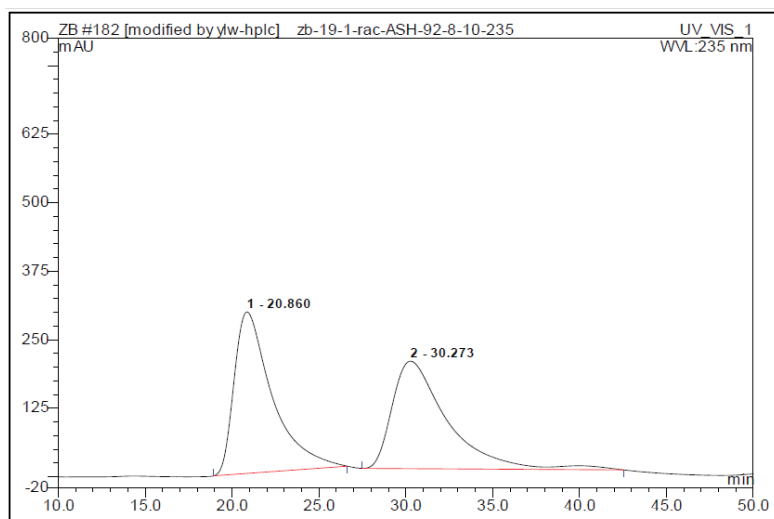

| No.           | Ret.Time<br>min | Peak Name | Height<br>mAU | Area<br>mAU*min | Rel.Area<br>% | Amount<br>n.a. | Type |
|---------------|-----------------|-----------|---------------|-----------------|---------------|----------------|------|
| 1             | 20.86           | n.a.      | 294.475       | 749.115         | 50.89         | n.a.           | BMB* |
| 2             | 30.27           | n.a.      | 196.082       | 722.913         | 49.11         | n.a.           | BMB* |
| <b>Total:</b> |                 |           | 490.557       | 1472.028        | 100.00        | 0.000          |      |

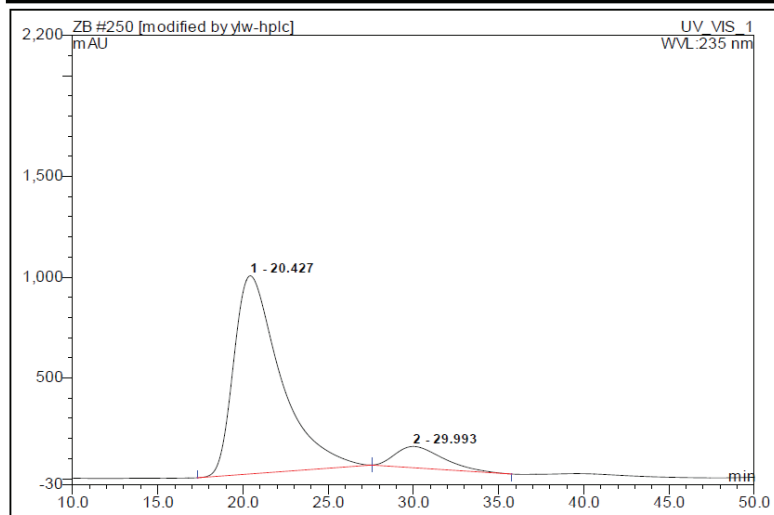

| No.           | Ret.Time<br>min | Peak Name | Height<br>mAU | Area<br>mAU*min | Rel.Area<br>% | Amount<br>n.a. | Type |
|---------------|-----------------|-----------|---------------|-----------------|---------------|----------------|------|
| 1             | 20.43           | n.a.      | 982.941       | 3138.106        | 90.10         | n.a.           | BMB* |
| 2             | 29.99           | n.a.      | 105.486       | 344.625         | 9.90          | n.a.           | bMB* |
| <b>Total:</b> |                 |           | 1088.428      | 3482.731        | 100.00        | 0.000          |      |

Supplementary Figure 100. HPLC spectrum for compound 2w-ent

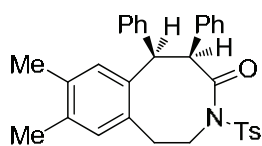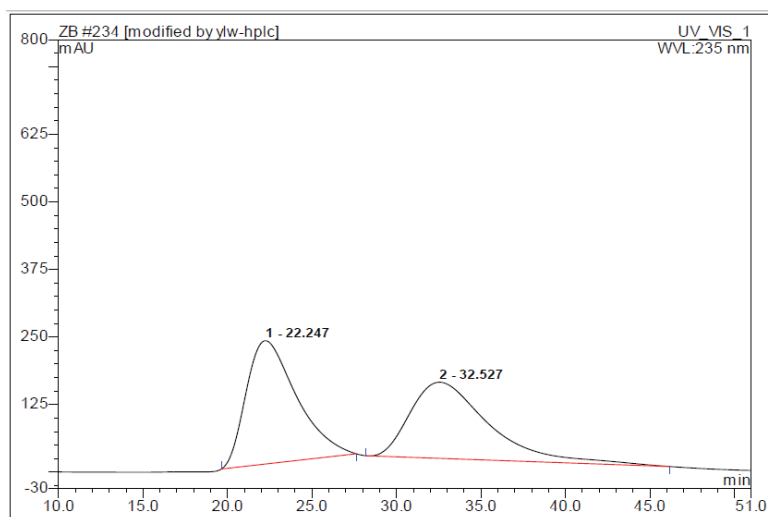

| No.           | Ret.Time<br>min | Peak Name | Height<br>mAU | Area<br>mAU*min | Rel.Area<br>% | Amount<br>n.a. | Type |
|---------------|-----------------|-----------|---------------|-----------------|---------------|----------------|------|
| 1             | 22.25           | n.a.      | 228.036       | 787.109         | 50.96         | n.a.           | BMB* |
| 2             | 32.53           | n.a.      | 140.791       | 757.498         | 49.04         | n.a.           | BMB* |
| <b>Total:</b> |                 |           | 368.827       | 1544.607        | 100.00        | 0.000          |      |

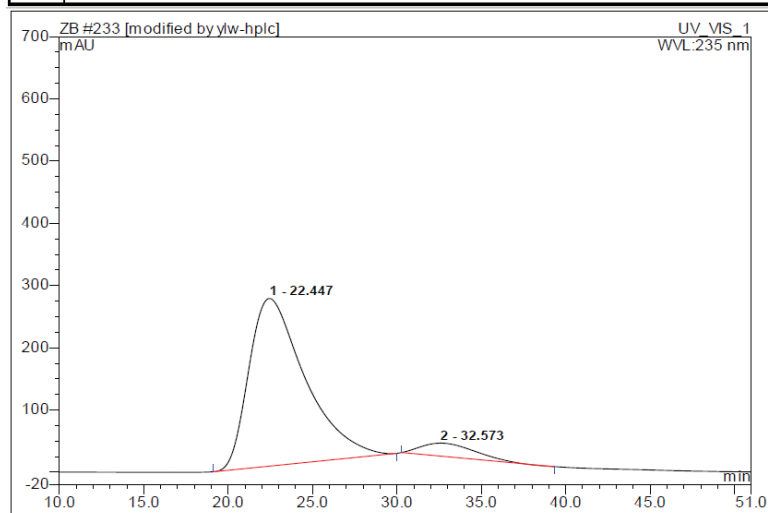

| No.           | Ret.Time<br>min | Peak Name | Height<br>mAU | Area<br>mAU*min | Rel.Area<br>% | Amount<br>n.a. | Type |
|---------------|-----------------|-----------|---------------|-----------------|---------------|----------------|------|
| 1             | 22.45           | n.a.      | 269.337       | 1041.655        | 93.01         | n.a.           | BMB* |
| 2             | 32.57           | n.a.      | 20.839        | 78.234          | 6.99          | n.a.           | BMB* |
| <b>Total:</b> |                 |           | 290.176       | 1119.889        | 100.00        | 0.000          |      |

Supplementary Figure 101. HPLC spectrum for compound *2z-ent*

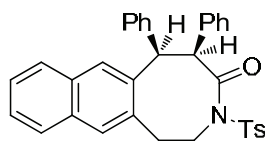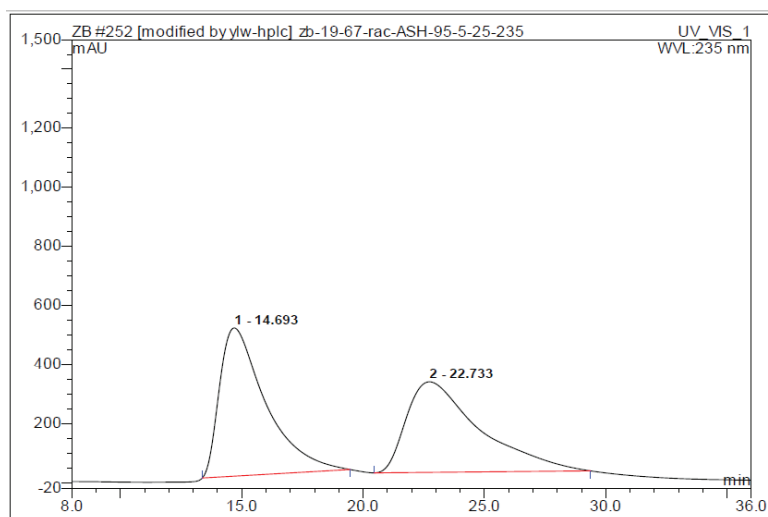

| No.           | Ret.Time<br>min | Peak Name | Height<br>mAU | Area<br>mAU*min | Rel.Area<br>% | Amount<br>n.a. | Type |
|---------------|-----------------|-----------|---------------|-----------------|---------------|----------------|------|
| 1             | 14.69           | n.a.      | 501.866       | 1107.688        | 50.95         | n.a.           | BMB* |
| 2             | 22.73           | n.a.      | 306.584       | 1066.463        | 49.05         | n.a.           | BMB* |
| <b>Total:</b> |                 |           | 808.451       | 2174.151        | 100.00        | 0.000          |      |

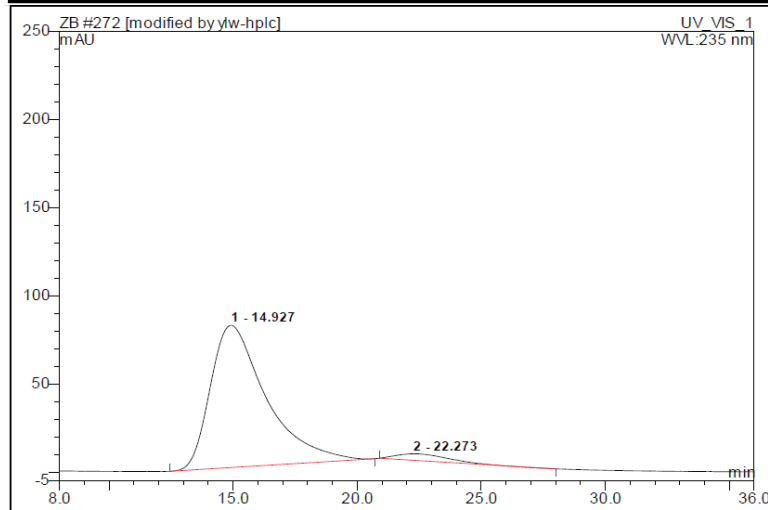

| No.           | Ret.Time<br>min | Peak Name | Height<br>mAU | Area<br>mAU*min | Rel.Area<br>% | Amount<br>n.a. | Type |
|---------------|-----------------|-----------|---------------|-----------------|---------------|----------------|------|
| 1             | 14.93           | n.a.      | 80.709        | 210.113         | 95.99         | n.a.           | BMB* |
| 2             | 22.27           | n.a.      | 3.705         | 8.782           | 4.01          | n.a.           | BMB* |
| <b>Total:</b> |                 |           | 84.415        | 218.895         | 100.00        | 0.000          |      |

Supplementary Figure 102. HPLC spectrum for compound 2ab-ent

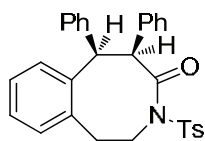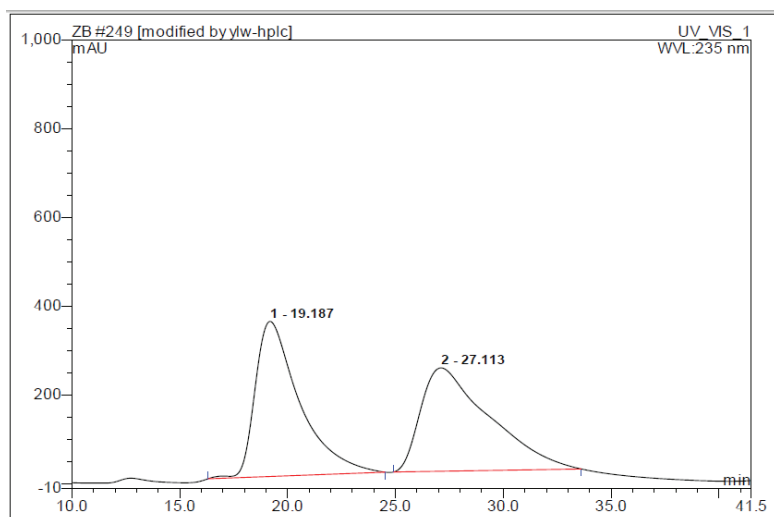

| No.           | Ret.Time<br>min | Peak Name | Height<br>mAU | Area<br>mAU*min | Rel.Area<br>% | Amount<br>n.a. | Type |
|---------------|-----------------|-----------|---------------|-----------------|---------------|----------------|------|
| 1             | 19.19           | n.a.      | 348.898       | 831.918         | 49.36         | n.a.           | BMB* |
| 2             | 27.11           | n.a.      | 232.567       | 853.459         | 50.64         | n.a.           | BMB* |
| <b>Total:</b> |                 |           | 581.465       | 1685.376        | 100.00        | 0.000          |      |

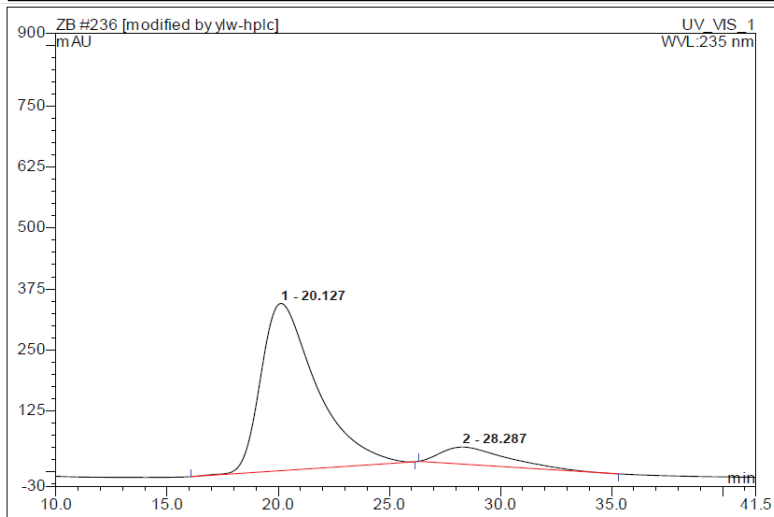

| No.           | Ret.Time<br>min | Peak Name | Height<br>mAU | Area<br>mAU*min | Rel.Area<br>% | Amount<br>n.a. | Type |
|---------------|-----------------|-----------|---------------|-----------------|---------------|----------------|------|
| 1             | 20.13           | n.a.      | 342.851       | 997.626         | 89.07         | n.a.           | BMB* |
| 2             | 28.29           | n.a.      | 34.906        | 122.469         | 10.93         | n.a.           | BMB* |
| <b>Total:</b> |                 |           | 377.757       | 1120.095        | 100.00        | 0.000          |      |

Supplementary Figure 103. HPLC spectrum for compound 2a-ent



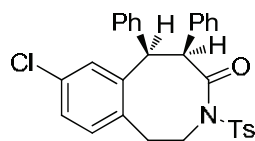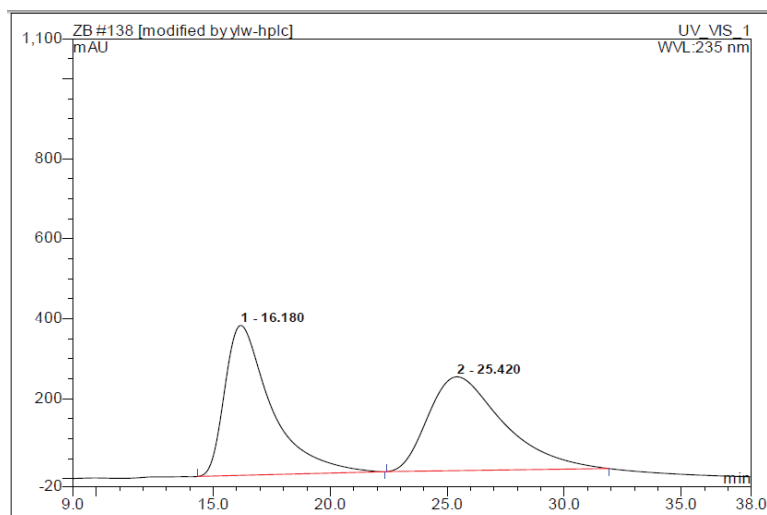

| No.           | Ret.Time<br>min | Peak Name | Height<br>mAU | Area<br>mAU*min | Rel.Area<br>% | Amount<br>n.a. | Type |
|---------------|-----------------|-----------|---------------|-----------------|---------------|----------------|------|
| 1             | 16.18           | n.a.      | 374.636       | 863.325         | 49.76         | n.a.           | BMB* |
| 2             | 25.42           | n.a.      | 234.462       | 871.671         | 50.24         | n.a.           | BMB* |
| <b>Total:</b> |                 |           | 609.098       | 1734.995        | 100.00        | 0.000          |      |

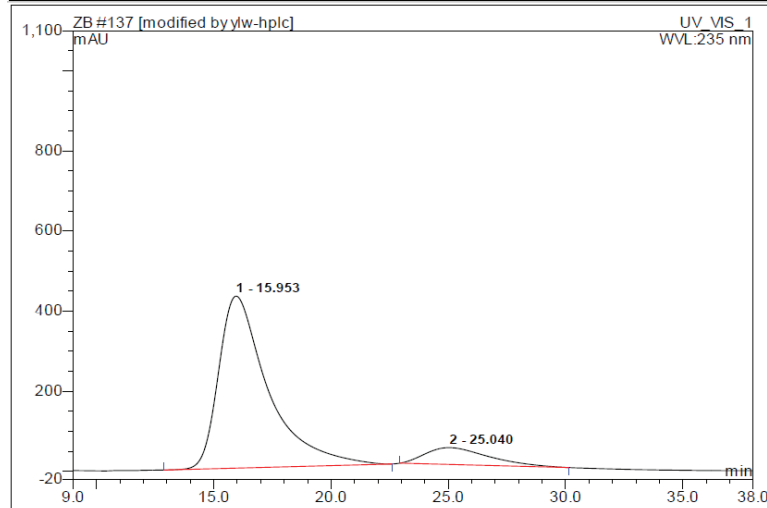

| No.           | Ret.Time<br>min | Peak Name | Height<br>mAU | Area<br>mAU*min | Rel.Area<br>% | Amount<br>n.a. | Type |
|---------------|-----------------|-----------|---------------|-----------------|---------------|----------------|------|
| 1             | 15.95           | n.a.      | 429.203       | 1052.856        | 88.91         | n.a.           | BMB* |
| 2             | 25.04           | n.a.      | 41.986        | 131.373         | 11.09         | n.a.           | BMB* |
| <b>Total:</b> |                 |           | 471.188       | 1184.229        | 100.00        | 0.000          |      |

Supplementary Figure 104. HPLC spectrum for compound 2u-ent

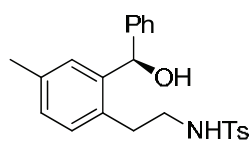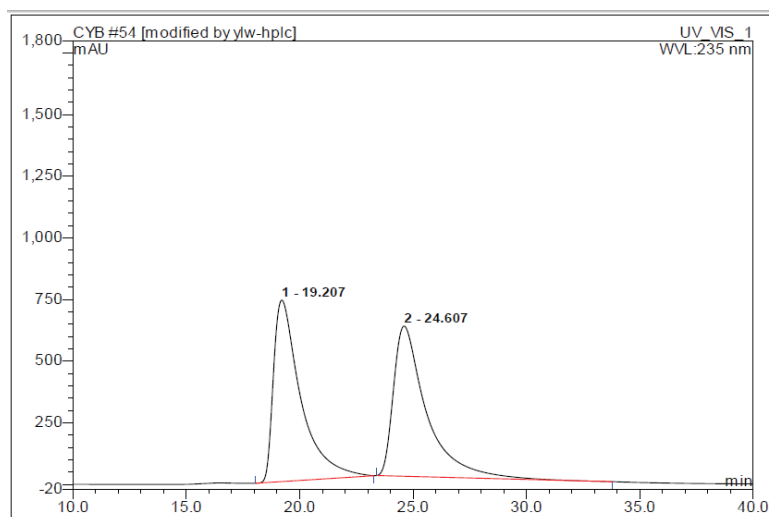

| No.           | Ret.Time<br>min | Peak Name | Height<br>mAU | Area<br>mAU*min | Rel.Area<br>% | Amount<br>n.a. | Type |
|---------------|-----------------|-----------|---------------|-----------------|---------------|----------------|------|
| 1             | 19.21           | n.a.      | 735.733       | 1025.693        | 50.00         | n.a.           | BMB* |
| 2             | 24.61           | n.a.      | 608.879       | 1025.516        | 50.00         | n.a.           | BMB* |
| <b>Total:</b> |                 |           | 1344.613      | 2051.209        | 100.00        | 0.000          |      |

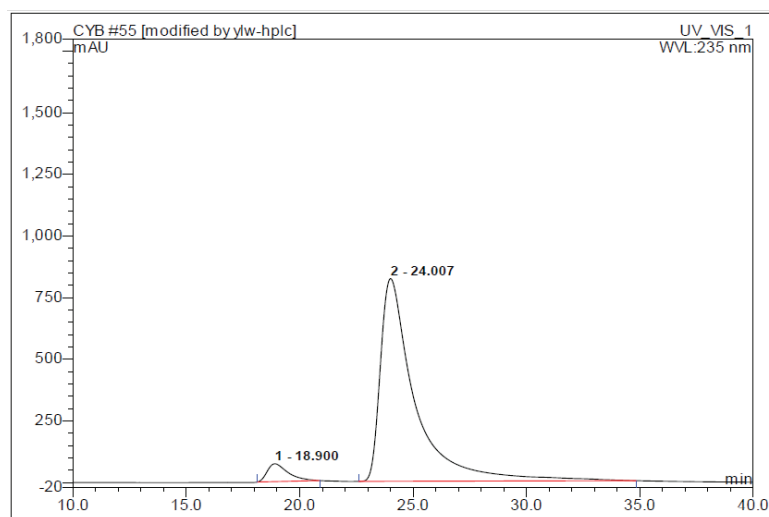

| No.           | Ret.Time<br>min | Peak Name | Height<br>mAU | Area<br>mAU*min | Rel.Area<br>% | Amount<br>n.a. | Type |
|---------------|-----------------|-----------|---------------|-----------------|---------------|----------------|------|
| 1             | 18.90           | n.a.      | 72.345        | 76.914          | 5.00          | n.a.           | BMB* |
| 2             | 24.01           | n.a.      | 821.705       | 1461.503        | 95.00         | n.a.           | BMB* |
| <b>Total:</b> |                 |           | 894.050       | 1538.416        | 100.00        | 0.000          |      |

Supplementary Figure 105. HPLC spectrum for compound (R)-1p'

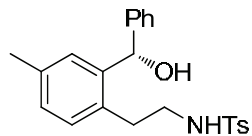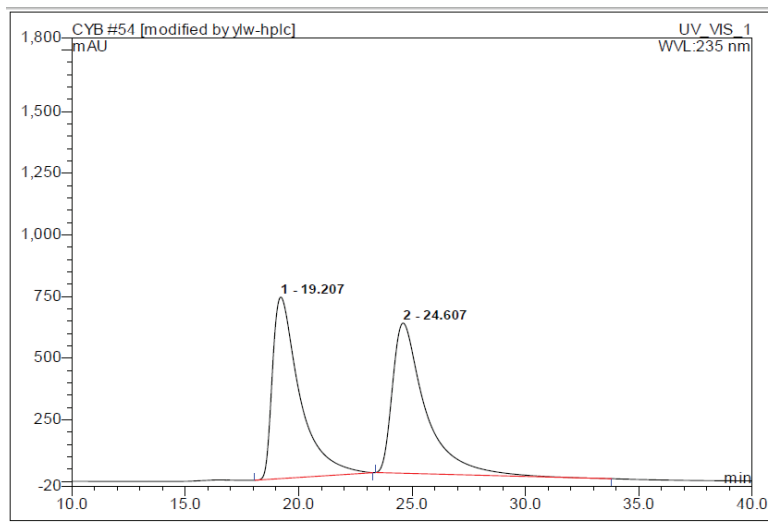

| No.           | Ret.Time<br>min | Peak Name | Height<br>mAU | Area<br>mAU*min | Rel.Area<br>% | Amount<br>n.a. | Type |
|---------------|-----------------|-----------|---------------|-----------------|---------------|----------------|------|
| 1             | 19.21           | n.a.      | 735.733       | 1025.693        | 50.00         | n.a.           | BMB* |
| 2             | 24.61           | n.a.      | 608.879       | 1025.516        | 50.00         | n.a.           | BMB* |
| <b>Total:</b> |                 |           | 1344.613      | 2051.209        | 100.00        | 0.000          |      |

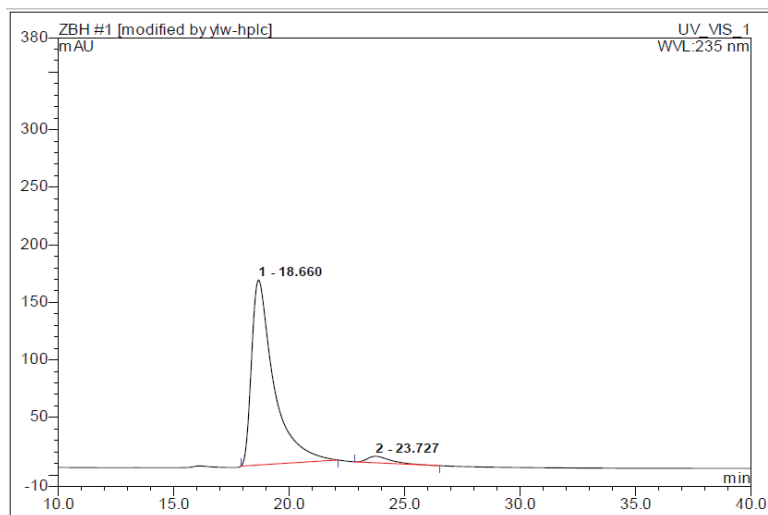

| No.           | Ret.Time<br>min | Peak Name | Height<br>mAU | Area<br>mAU*min | Rel.Area<br>% | Amount<br>n.a. | Type |
|---------------|-----------------|-----------|---------------|-----------------|---------------|----------------|------|
| 1             | 18.66           | n.a.      | 160.709       | 179.191         | 96.48         | n.a.           | BMB* |
| 2             | 23.73           | n.a.      | 5.615         | 6.528           | 3.52          | n.a.           | BMB* |
| <b>Total:</b> |                 |           | 166.324       | 185.719         | 100.00        | 0.000          |      |

Supplementary Figure 106. HPLC spectrum for compound (S)-1p'

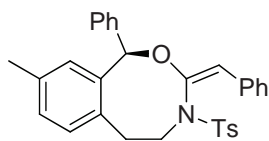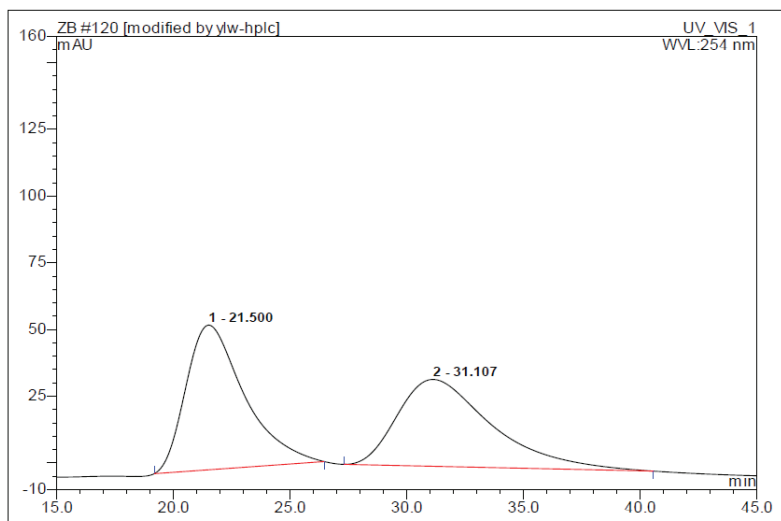

| No.           | Ret.Time<br>min | Peak Name | Height<br>mAU | Area<br>mAU*min | Rel.Area<br>% | Amount<br>n.a. | Type |
|---------------|-----------------|-----------|---------------|-----------------|---------------|----------------|------|
| 1             | 21.50           | n.a.      | 54.216        | 157.360         | 50.94         | n.a.           | BMB* |
| 2             | 31.11           | n.a.      | 32.553        | 151.555         | 49.06         | n.a.           | BMB* |
| <b>Total:</b> |                 |           | 86.770        | 308.915         | 100.00        | 0.000          |      |

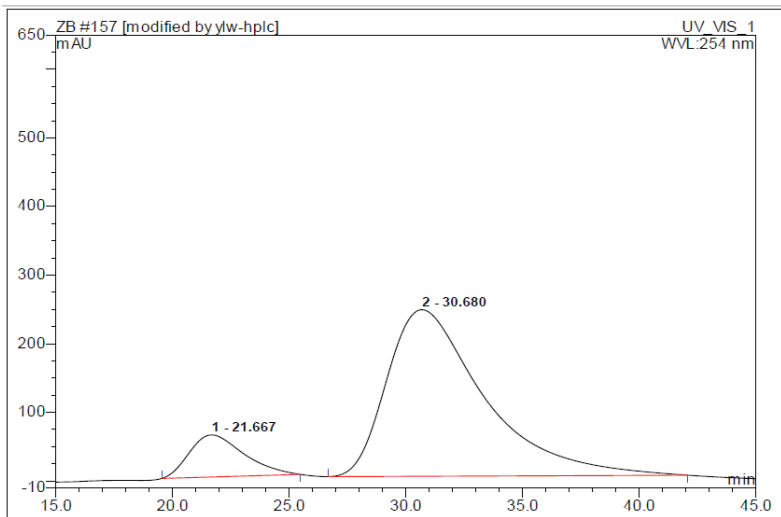

| No.           | Ret.Time<br>min | Peak Name | Height<br>mAU | Area<br>mAU*min | Rel.Area<br>% | Amount<br>n.a. | Type |
|---------------|-----------------|-----------|---------------|-----------------|---------------|----------------|------|
| 1             | 21.67           | n.a.      | 61.269        | 165.574         | 12.37         | n.a.           | BMB* |
| 2             | 30.68           | n.a.      | 242.713       | 1172.507        | 87.63         | n.a.           | BMB* |
| <b>Total:</b> |                 |           | 303.982       | 1338.081        | 100.00        | 0.000          |      |

Supplementary Figure 107. HPLC spectrum for compound (R)-6p

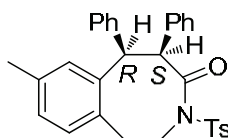

| No.           | Ret.Time min | Peak Name | Height mAU | Area mAU*min | Rel.Area % | Amount n.a. | Type |
|---------------|--------------|-----------|------------|--------------|------------|-------------|------|
| 1             | 13.93        | n.a.      | 353.050    | 704.688      | 49.70      | n.a.        | BMB* |
| 2             | 20.73        | n.a.      | 235.496    | 713.245      | 50.30      | n.a.        | BMB* |
| <b>Total:</b> |              |           | 588.546    | 1417.933     | 100.00     | 0.000       |      |

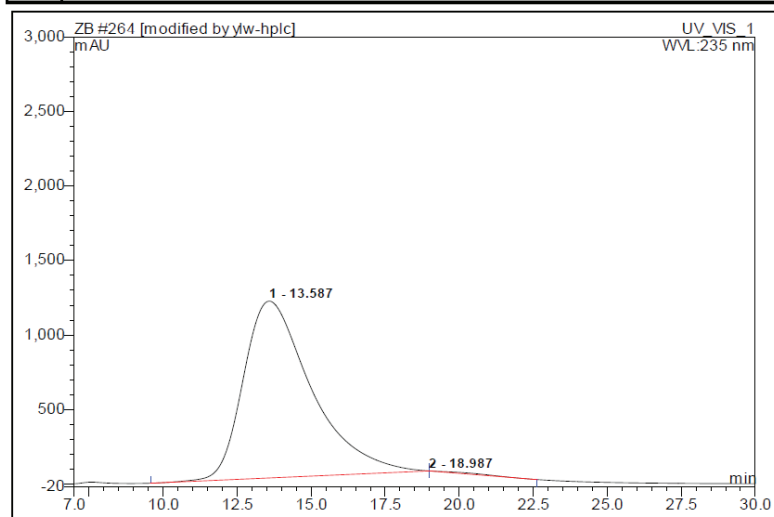

| No.           | Ret.Time min | Peak Name | Height mAU | Area mAU*min | Rel.Area % | Amount n.a. | Type |
|---------------|--------------|-----------|------------|--------------|------------|-------------|------|
| 1             | 13.59        | n.a.      | 1187.794   | 3170.963     | 99.63      | n.a.        | BMB* |
| 2             | 18.99        | n.a.      | 0.024      | 11.624       | 0.37       | n.a.        | bMB* |
| <b>Total:</b> |              |           | 1187.818   | 3182.587     | 100.00     | 0.000       |      |

**Supplementary Figure 108. HPLC spectrum for compound (R,S)-2p, prepared from (R)-1p (e.r. 95:5) with Cat. 3**

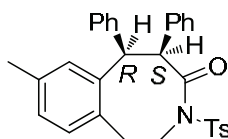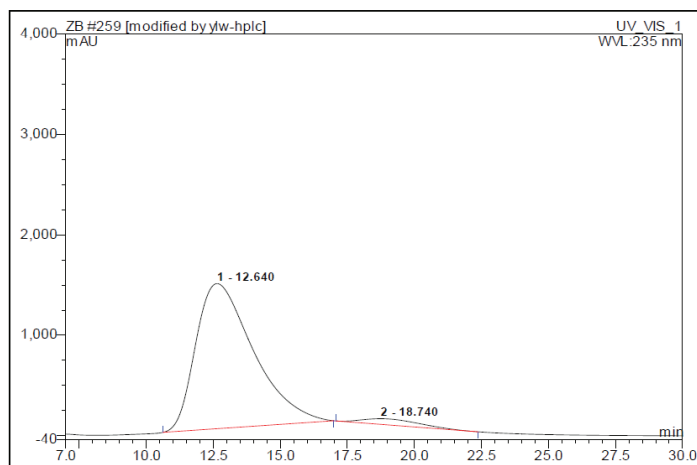

| No.           | Ret.Time<br>min | Peak Name | Height<br>mAU | Area<br>mAU*min | Rel.Area<br>% | Amount<br>n.a. | Type |
|---------------|-----------------|-----------|---------------|-----------------|---------------|----------------|------|
| 1             | 12.64           | n.a.      | 1444.777      | 3606.924        | 96.11         | n.a.           | BMB* |
| 2             | 18.74           | n.a.      | 56.251        | 145.862         | 3.89          | n.a.           | BMB* |
| <b>Total:</b> |                 |           | 1501.028      | 3752.785        | 100.00        | 0.000          |      |

**Supplementary Figure 109. HPLC spectrum for compound (*R,S*)-2p, prepared from (*R*)-1p (e.r. 95:5) with HOTf**

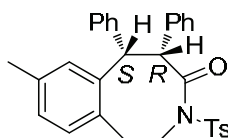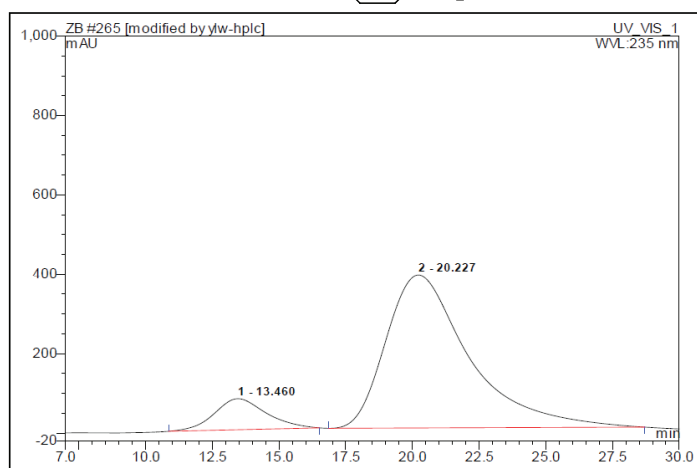

| No.           | Ret.Time<br>min | Peak Name | Height<br>mAU | Area<br>mAU*min | Rel.Area<br>% | Amount<br>n.a. | Type |
|---------------|-----------------|-----------|---------------|-----------------|---------------|----------------|------|
| 1             | 13.46           | n.a.      | 78.179        | 175.306         | 11.20         | n.a.           | BMB* |
| 2             | 20.23           | n.a.      | 385.289       | 1389.695        | 88.80         | n.a.           | BMB* |
| <b>Total:</b> |                 |           | 463.469       | 1565.001        | 100.00        | 0.000          |      |

**Supplementary Figure 110. HPLC spectrum for compound (*S,R*)-2p, prepared from (*S*)-1p (e.r. 96:4) with Cat. 3**

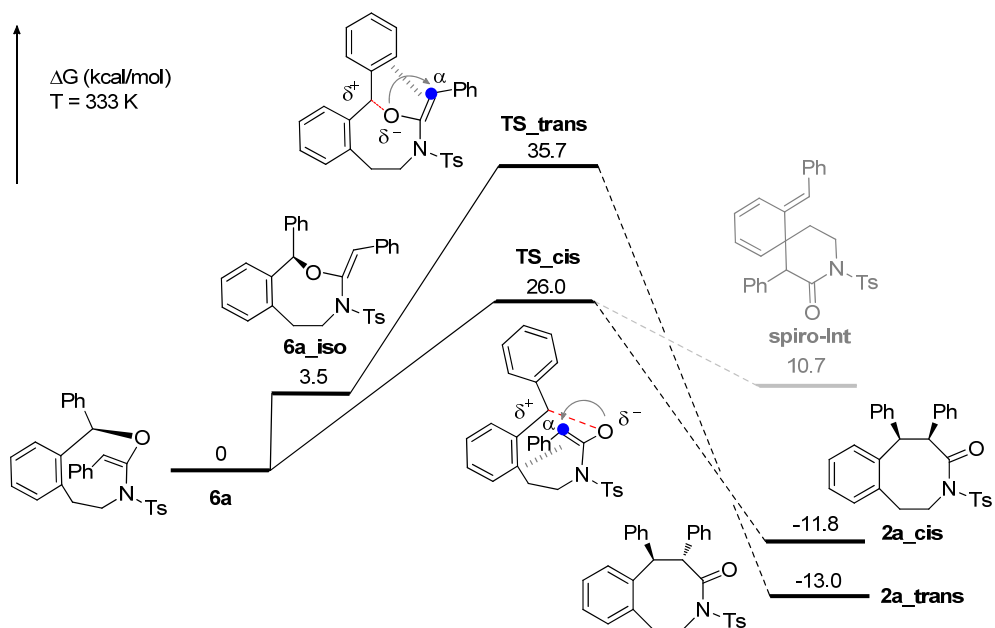

**Supplementary Figure 111.** Free energy profiles of the reaction using B3LYP-D3. The free energies with solvation corrections (solvent = chlorobenzene) and temperature corrections are given in kcal/mol.

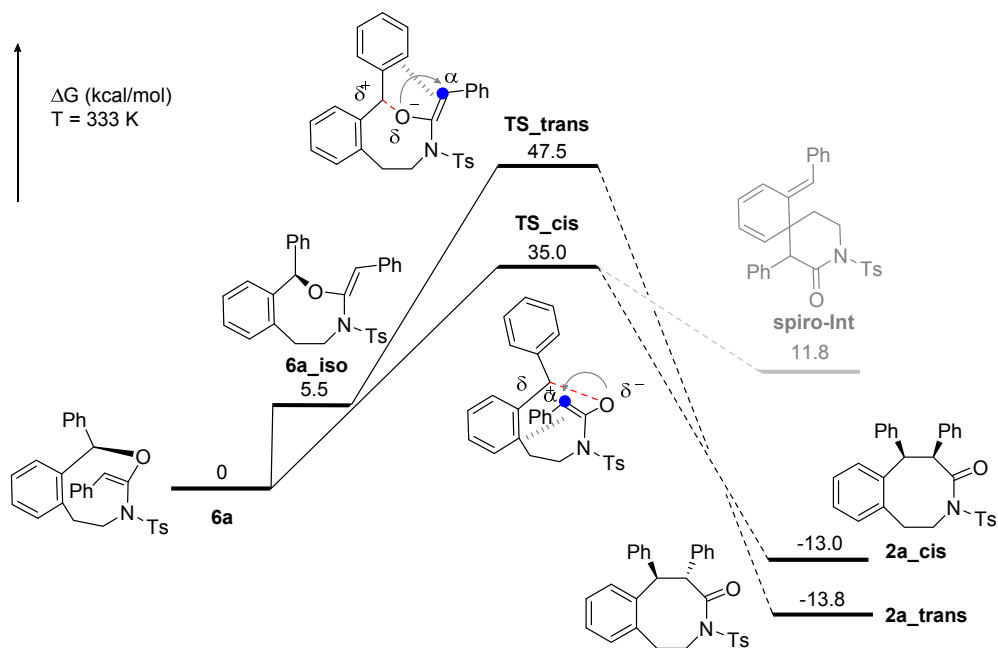

**Supplementary Figure 112.** Free energy profiles of the reaction using M062X. The free energies with solvation corrections (solvent = chlorobenzene) and temperature corrections are given in kcal/mol.

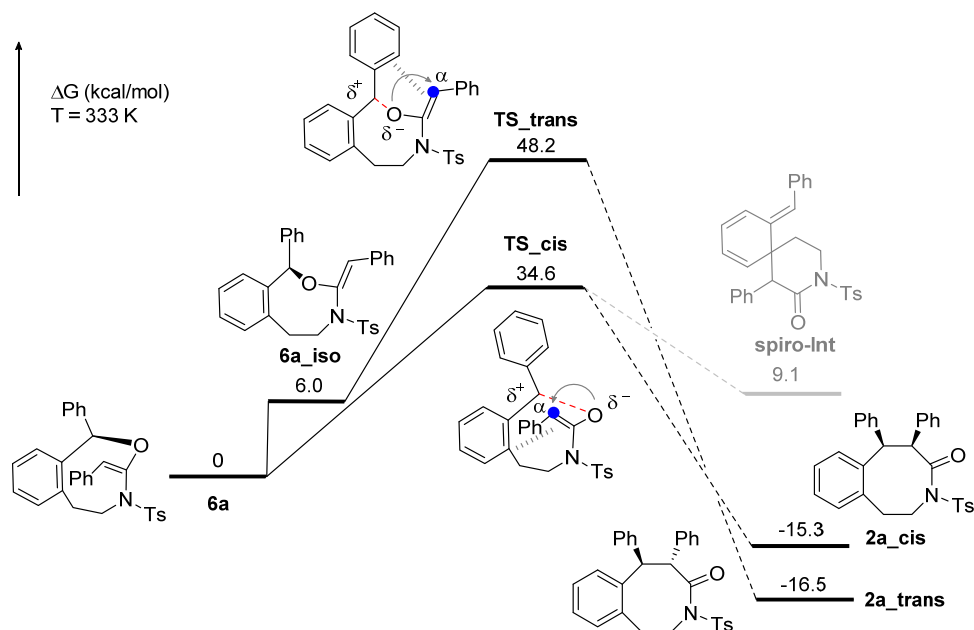

**Supplementary Figure 113.** Free energy profiles of the reaction using  $\omega$ B97XD . The free energies with solvation corrections (solvent = chlorobenzene) and temperature corrections are given in kcal/mol.

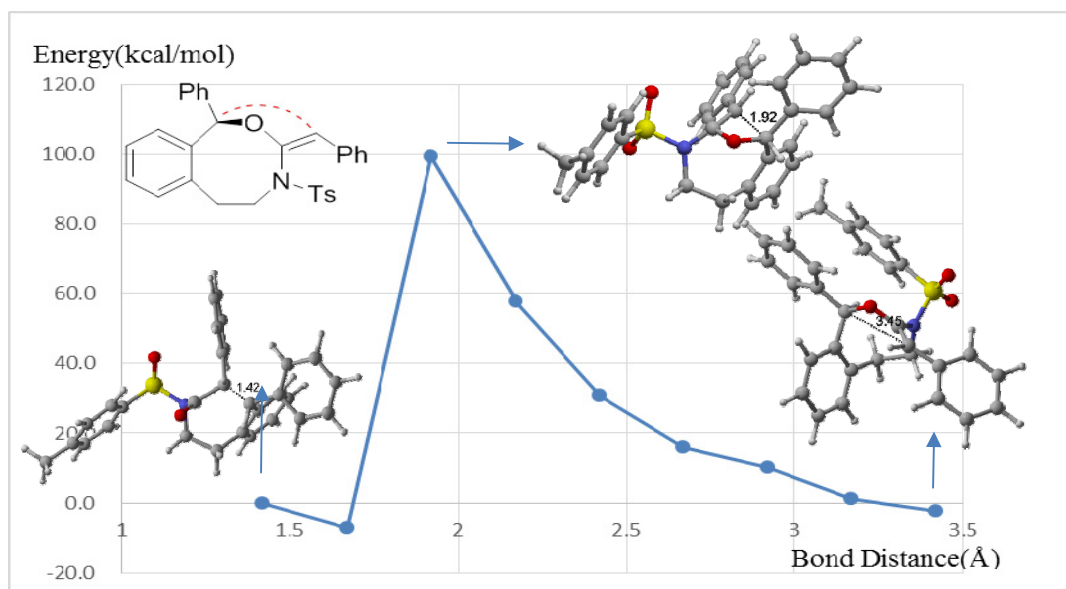

**Supplementary Figure 114.** Energy scans depended on C-C bond distance to form possible transition states of [1,3]-rearrangement. Due to extremely high energy barrier, direct [1,3] O-to-C rearrangement seems not to be accessible in our case at the B3LYP-D3 level of theory.



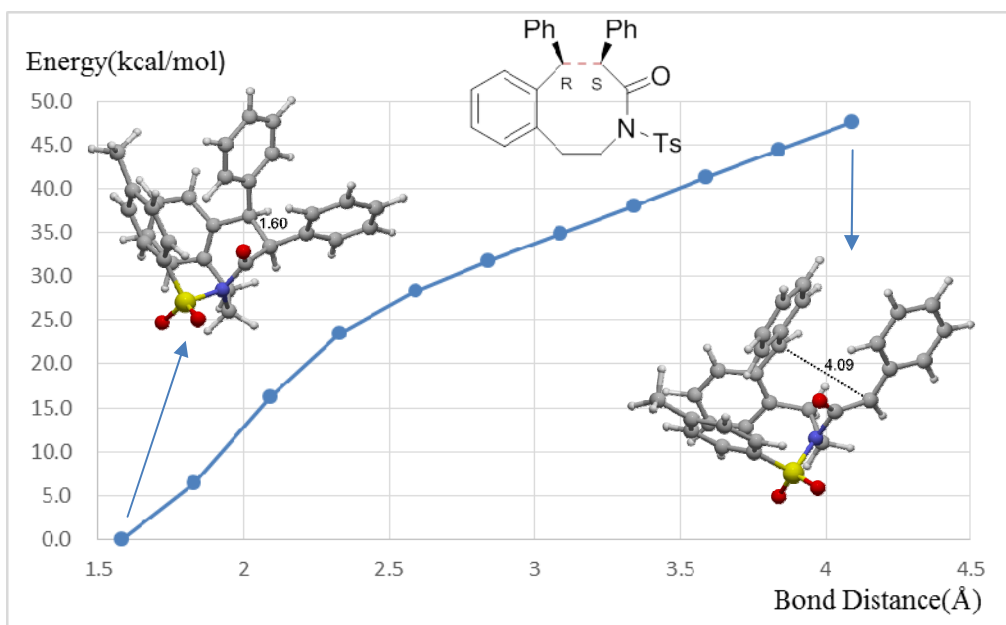

**Supplementary Figure 115.** Energy scans depended on C-C bond distance to form **2a-cis**. The figure indicates the process of C-C bond formation is exothermic without an apparent transition state at the B3LYP-D3 level of theory.

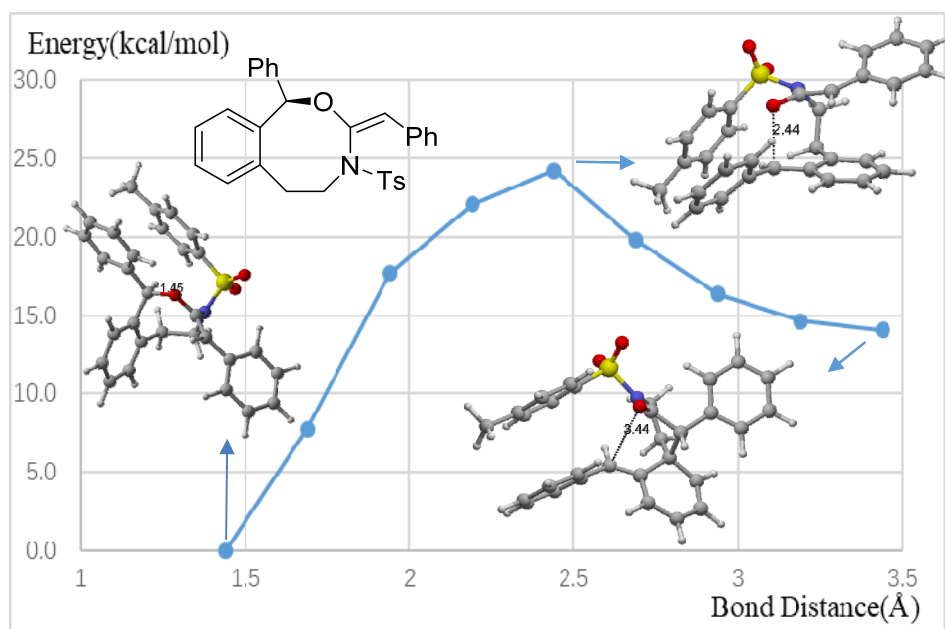

**Supplementary Figure 116.** Energy scans depended on C-O bond distance to form spiro-Int via [3,3]-rearrangement at the B3LYP-D3 level of theory.

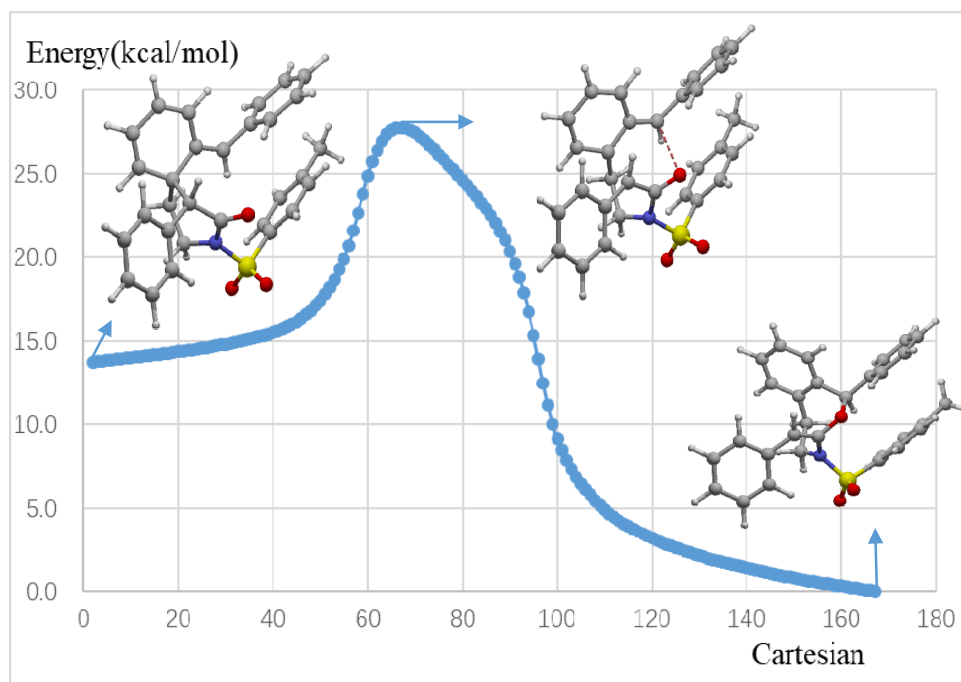

**Supplementary Figure 117.** The intrinsic reaction coordinate (IRC) of the calculated reaction at the B3LYP-D3 level of theory.

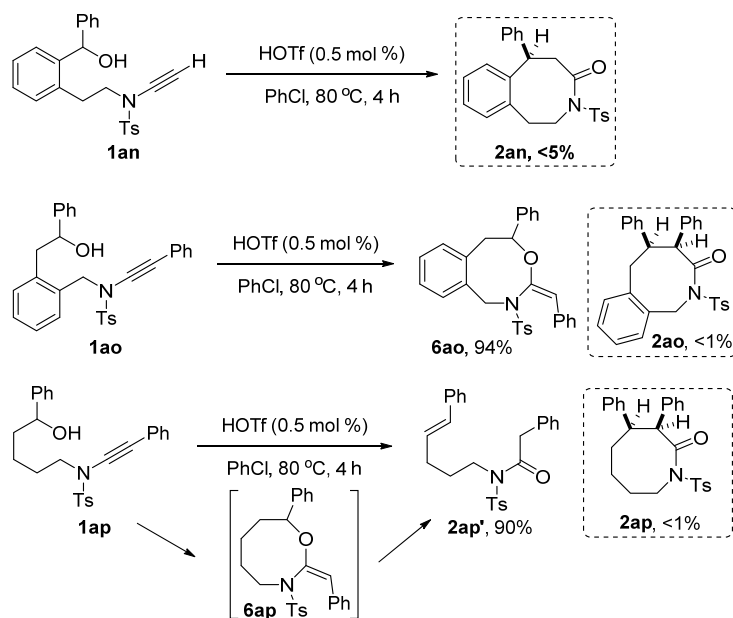

**Supplementary Figure 118.** Ynamides **1an-1ap** which failed to give the desired products.

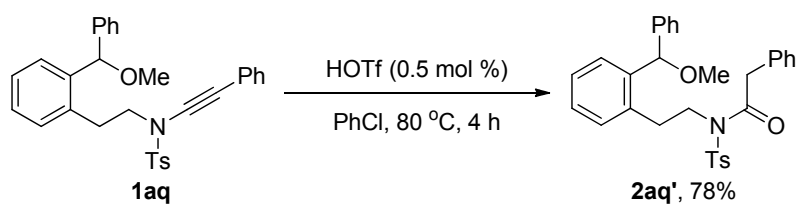

Supplementary Figure 119. HOTf-catalyzed cascade cyclization of ynamide **1aq**.

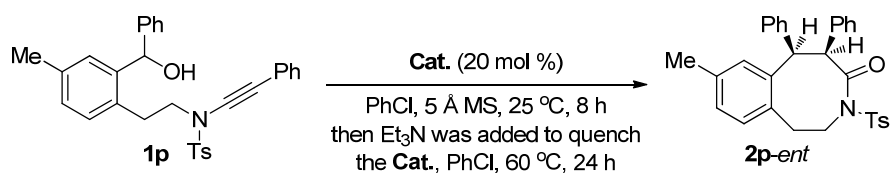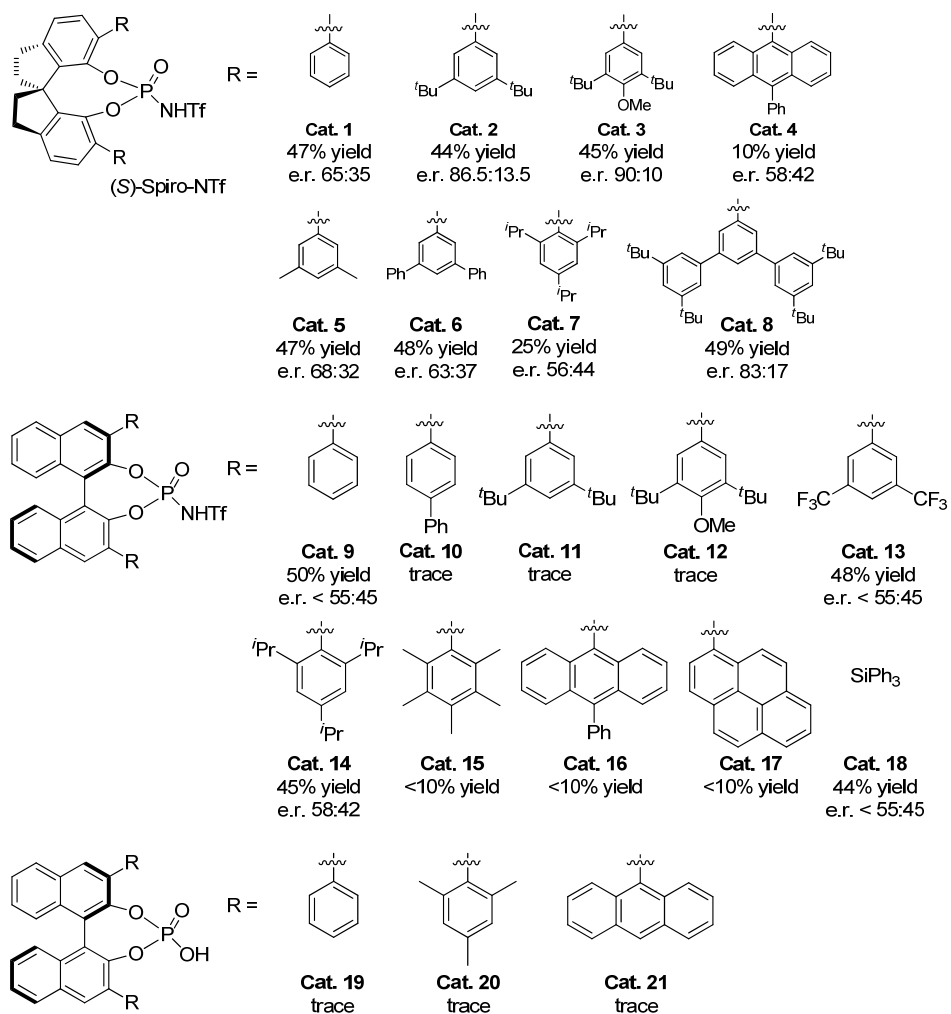

Supplementary Figure 120. The effect of other Brønsted acid catalysts.

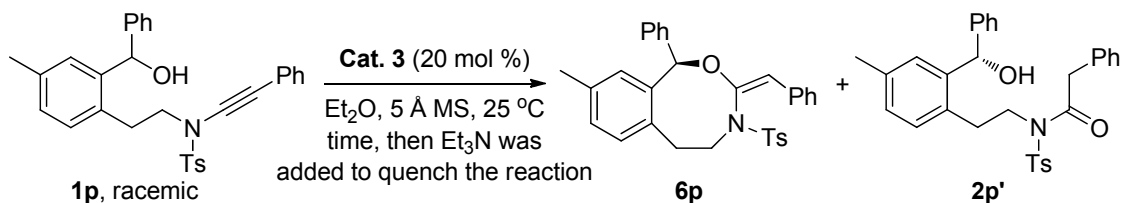

| entry <sup>a</sup> | time | conversion | yield of <b>6p</b> | e.r. of <b>6p</b> | yield of <b>2p'</b> | e.r. of <b>2p'</b> |
|--------------------|------|------------|--------------------|-------------------|---------------------|--------------------|
| 1                  | 3 h  | 35%        | 18%                | 93:7              | 16%                 | 80:20              |
| 2                  | 8 h  | 84%        | 43%                | 90.5:9.5          | 40%                 | 82:18              |
| 3 <sup>b</sup>     | 9 h  | 92%        | 44%                | 87:13             | 41%                 | 79:21              |
| 4 <sup>c</sup>     | 12 h | 100%       | 46%                | 85:15             | 44%                 | 79:21              |

<sup>a</sup> Yields are measured by  $^1\text{H}$  NMR using diethyl phthalate as internal standard; ers are determined by HPLC analysis on a chiral stationary phase. <sup>b</sup> **2p** was obtained in 7% yield. <sup>c</sup> **2p** was obtained in 9% yield.

**Supplementary Figure 121.** Control experiments on the transformation of racemic ynamide **1p**.

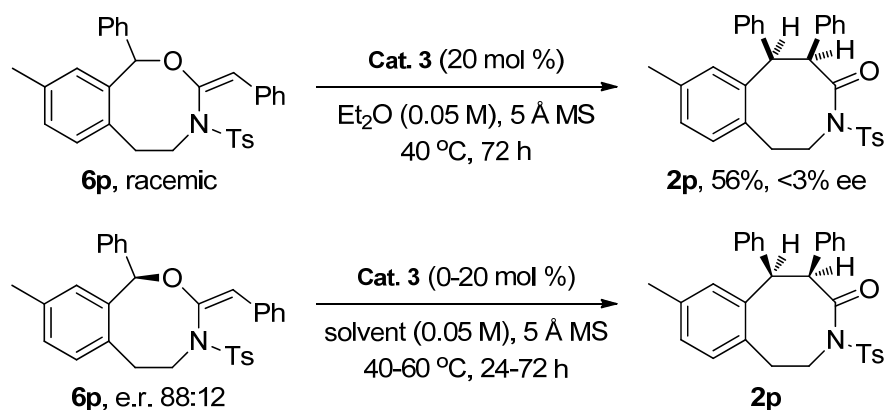

**Cat. 3** (20 mol %),  $\text{Et}_2\text{O}$ , 40 °C, 72 h: **2p**, 53%, e.r. 90:10  
 no catalyst,  $\text{Et}_2\text{O}$ , 40 °C, 72 h: **2p**, 54%, e.r. 90:10  
 no catalyst,  $\text{Et}_2\text{O}$ , 40 °C, 48 h: **2p**, 36%, e.r. 90:10 (recovered **6p**, e.r. 88:12)  
 no catalyst,  $\text{PhCl}$ , 60 °C, 24 h: **2p**, 85%, e.r. 91:9

**Supplementary Figure 122.** Control experiments on the transformation of **6p** into **2p**.

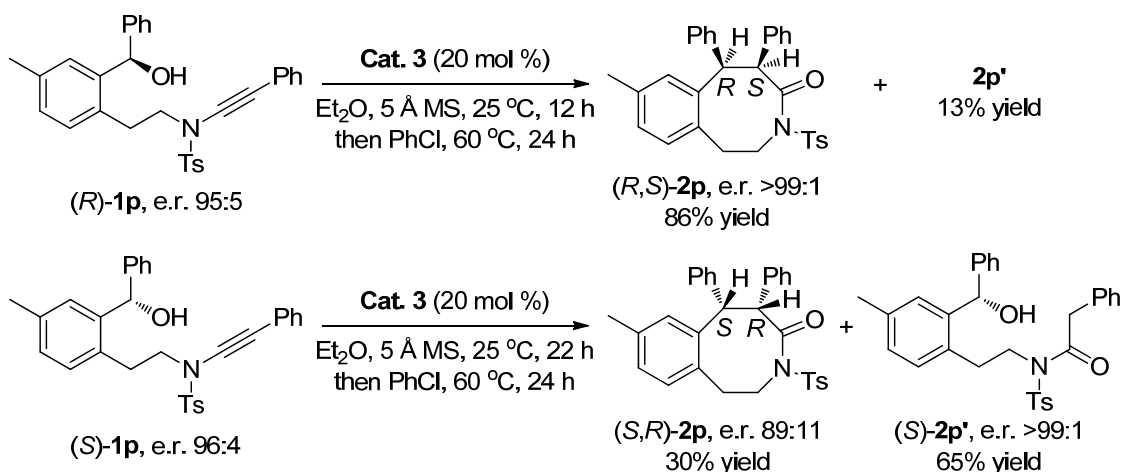

**Supplementary Figure 123.** Chiral Brønsted acid-catalyzed cascade cyclization of chiral ynamide **1p**.

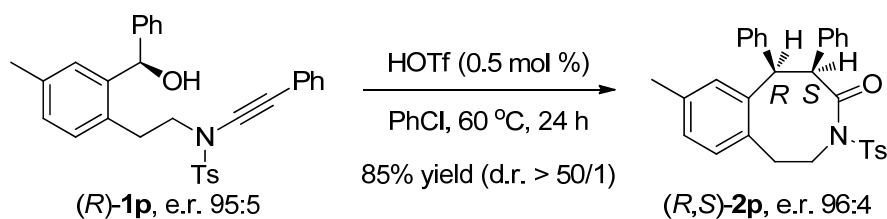

**Supplementary Figure 124.** HOTf-catalyzed cascade cyclization of chiral ynamide **1p**.

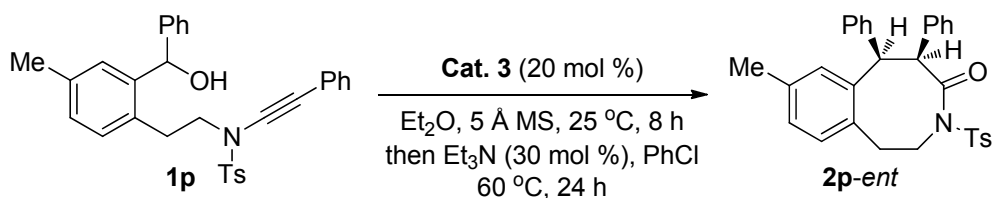

| time   | 1    | 2    | 3        | 4    | 5    |
|--------|------|------|----------|------|------|
| e.r.   | 95:5 | 95:5 | 95.5:4.5 | 95:5 | 94:6 |
| yield% | 42   | 44   | 40       | 42   | 44   |

**Supplementary Figure 125.** Studies on the reuse of the chiral catalyst.

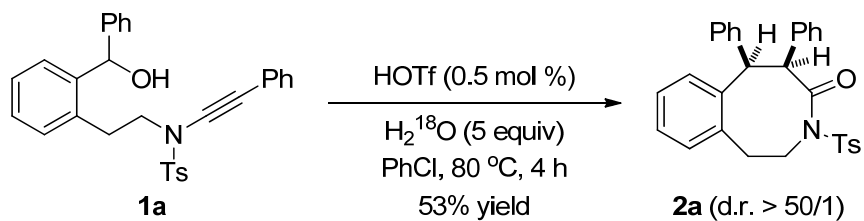

**Supplementary Figure 126.** H<sub>2</sub><sup>18</sup>O isotopic labeling study.

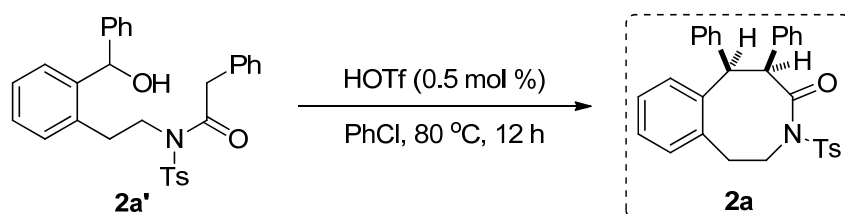

**Supplementary Figure 127.** Attempts on the conversion of **2a'** into **2a**.

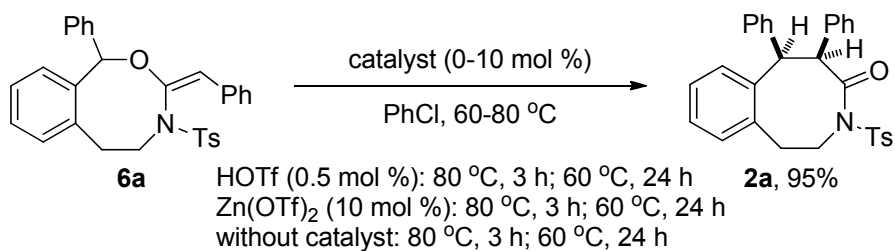

**Supplementary Figure 128.** Control experiments on the transformation of **6a** into **2a**.

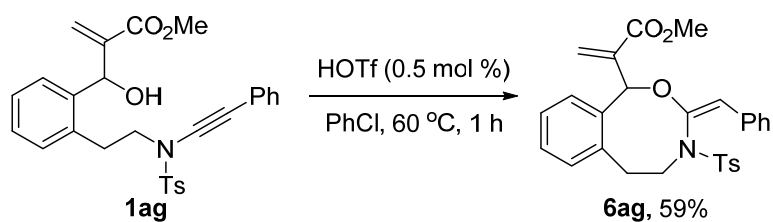

**Supplementary Figure 129.** HOTf-catalyzed transformation of **1ag** into **6ag**.

## Supplementary Tables

### Supplementary Table 1. Other reaction condition studies<sup>a</sup>

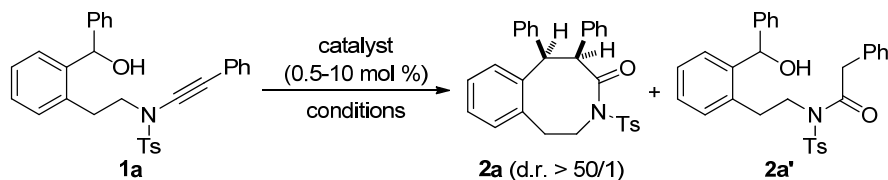

| entry            | catalyst                        | reaction conditions            | yield (%) <sup>b</sup> |            |
|------------------|---------------------------------|--------------------------------|------------------------|------------|
|                  |                                 |                                | <b>2a</b>              | <b>2a'</b> |
| 1 <sup>c</sup>   | Zn(OTf) <sub>2</sub> (10 mol %) | PhCl, 80 °C, 4 h               | 92                     | <1         |
| 2 <sup>c</sup>   | MsOH (10 mol %)                 | PhCl, 80 °C, 4 h               | 81                     | <1         |
| 3 <sup>c,d</sup> | HOTf (0.5 mol %)                | PhCl, 80 °C, 12 h              | <5                     | <1         |
| 4                | HNTf <sub>2</sub> (10 mol %)    | PhCl, 80 °C, 4 h               | <5                     | <1         |
| 5 <sup>d</sup>   | HNTf <sub>2</sub> (1 mol %)     | PhCl, 80 °C, 12 h              | <5                     | <1         |
| 6 <sup>d</sup>   | HNTf <sub>2</sub> (0.5 mol %)   | PhCl, 80 °C, 12 h              | <5                     | <1         |
| 7 <sup>d</sup>   | /                               | PhCl, 80 °C, 24 h              | <1                     | <1         |
| 8                | HOTf (0.5 mol %)                | DCE, 80 °C, 18 h               | 62                     | <1         |
| 9                | HOTf (0.5 mol %)                | MeNO <sub>2</sub> , 80 °C, 4 h | 56                     | <1         |
| 10               | HOTf (0.5 mol %)                | PhCl, 60 °C, 24 h              | 90                     | <1         |
| 11 <sup>d</sup>  | HOTf (0.2 mol %)                | PhCl, 80 °C, 24 h              | <5                     | <1         |

<sup>a</sup> Reaction conditions: [**1a**] = 0.05 M. <sup>b</sup> Measured by <sup>1</sup>H NMR using diethyl phthalate as the internal standard. <sup>c</sup> Using 5 Å MS (60 mg/0.1 mmol) as additive. <sup>d</sup> > 95% of **1a** remained unreacted.

### Supplementary Table 2. The effect of reaction time when Et<sub>3</sub>N was added to quench the first step<sup>a</sup>

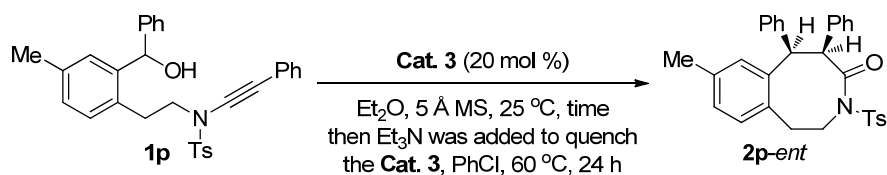

| entry | time (h) | yield (%) <sup>b</sup> | e.r. <sup>c</sup> |
|-------|----------|------------------------|-------------------|
| 1     | 3        | 18 (35% conversion)    | 96:4              |
| 2     | 8        | 42 (84% conversion)    | 95:5              |
| 3     | 9        | 46 (92% conversion)    | 91:9              |
| 4     | 12       | 57 (100% conversion)   | 90:10             |

<sup>a</sup> Reaction conditions: **1p** (0.1 mmol), **Cat. 3** (0.02 mmol), Et<sub>2</sub>O (2 mL), 25 °C, 3–12 h, then Et<sub>3</sub>N (0.03 mmol), PhCl (1 mL), 60 °C, 24 h, in vials. <sup>b</sup> Isolated yields. <sup>c</sup> Determined by HPLC analysis on a chiral stationary phase.

Supplementary Table 3. Crystal data and structure refinement for 2a. CCDC  
Number = 1880379

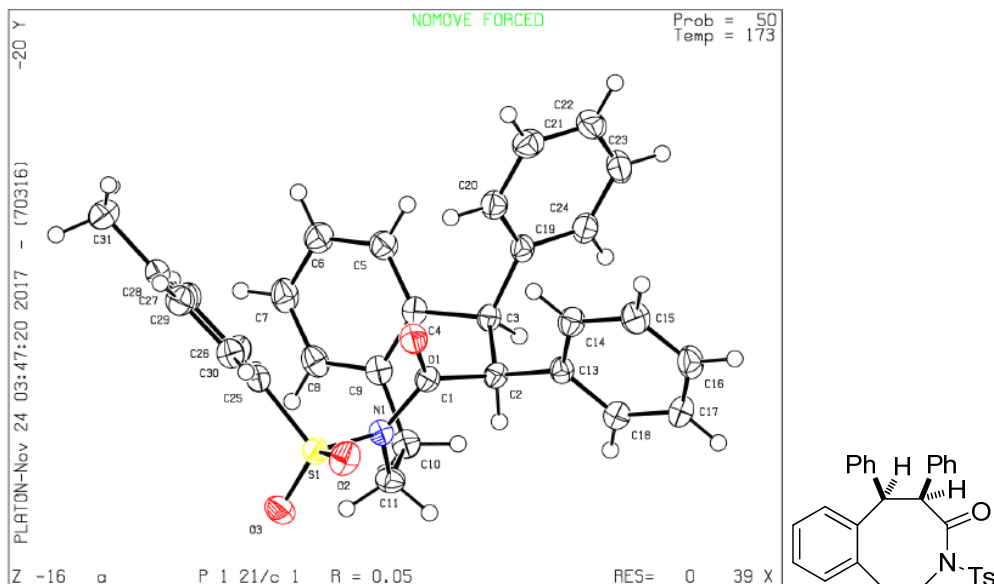

Bond precision: C-C = 0.0030 Å

Wavelength=0.71073

Cell: a=22.762 (3) b=8.4040 (11) c=12.0766 (15)  
alpha=90 beta=96.442 (2) gamma=90  
Temperature: 173 K

|                        | Calculated     | Reported       |
|------------------------|----------------|----------------|
| Volume                 | 2295.6 (5)     | 2295.6 (5)     |
| Space group            | P 21/c         | P 1 21/c 1     |
| Hall group             | -P 2ybc        | -P 2ybc        |
| Moiety formula         | C30 H27 N O3 S | C30 H27 N O3 S |
| Sum formula            | C30 H27 N O3 S | C30 H27 N O3 S |
| Mr                     | 481.59         | 481.58         |
| Dx, g cm <sup>-3</sup> | 1.393          | 1.393          |
| Z                      | 4              | 4              |
| Mu (mm <sup>-1</sup> ) | 0.176          | 0.176          |
| F000                   | 1016.0         | 1016.0         |
| F000'                  | 1016.92        |                |
| h, k, lmax             | 29, 10, 15     | 29, 10, 15     |
| Nref                   | 5257           | 5212           |
| Tmin, Tmax             | 0.919, 0.949   |                |
| Tmin'                  | 0.914          |                |

Correction method= Not given

Data completeness= 0.991 Theta (max)= 27.484

R(reflections)= 0.0536 ( 4708) wR2(reflections)= 0.1478 ( 5212)

S = 1.161 Npar= 317



**Supplementary Table 4. Crystal data and structure refinement for 2ac. CCDC  
Number = 1880411**

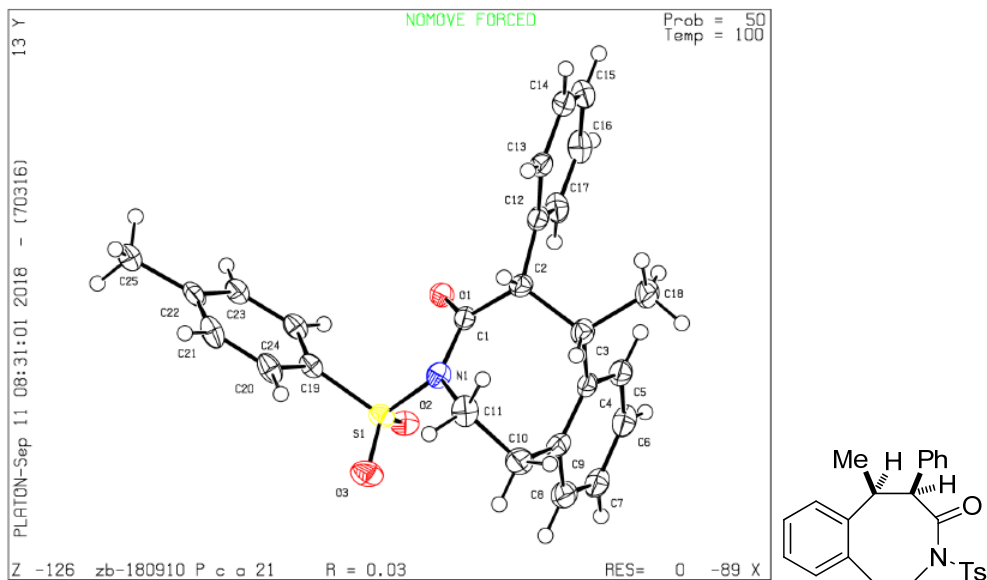


---

|                 |                           |                         |                           |
|-----------------|---------------------------|-------------------------|---------------------------|
| Bond precision: | C-C = 0.0041 Å            | Wavelength=1.54184      |                           |
| Cell:           | a=15.2812 (3)<br>alpha=90 | b=6.2107 (1)<br>beta=90 | c=22.0986 (4)<br>gamma=90 |
| Temperature:    | 100 K                     |                         |                           |

  

|                        | Calculated                                         | Reported                                           |
|------------------------|----------------------------------------------------|----------------------------------------------------|
| Volume                 | 2097.31 (7)                                        | 2097.31 (7)                                        |
| Space group            | P c a 21                                           | P c a 21                                           |
| Hall group             | P 2c -2ac                                          | P 2c -2ac                                          |
| Moiety formula         | C <sub>25</sub> H <sub>25</sub> N O <sub>3</sub> S | C <sub>25</sub> H <sub>25</sub> N O <sub>3</sub> S |
| Sum formula            | C <sub>25</sub> H <sub>25</sub> N O <sub>3</sub> S | C <sub>25</sub> H <sub>25</sub> N O <sub>3</sub> S |
| Mr                     | 419.52                                             | 419.52                                             |
| Dx, g cm <sup>-3</sup> | 1.329                                              | 1.329                                              |
| Z                      | 4                                                  | 4                                                  |
| Mu (mm <sup>-1</sup> ) | 1.587                                              | 1.587                                              |
| F <sub>000</sub>       | 888.0                                              | 888.0                                              |
| F <sub>000</sub> '     | 891.75                                             |                                                    |
| h, k, lmax             | 18, 7, 27                                          | 18, 7, 26                                          |
| Nref                   | 4101 [ 2109]                                       | 3838                                               |
| Tmin, Tmax             | 0.859, 0.881                                       | 0.815, 1.000                                       |
| Tmin'                  | 0.853                                              |                                                    |

Correction method= # Reported T Limits: Tmin=0.815 Tmax=1.000  
AbsCorr = MULTI-SCAN

|                               |                                 |
|-------------------------------|---------------------------------|
| Data completeness= 1.82/0.94  | Theta (max)= 71.527             |
| R(reflections)= 0.0318( 3715) | wR2(reflections)= 0.1039( 3838) |
| S = 0.915                     | Npar= 273                       |

---

Supplementary Table 5. Crystal data and structure refinement for 2ai. CCDC  
Number = 1880414

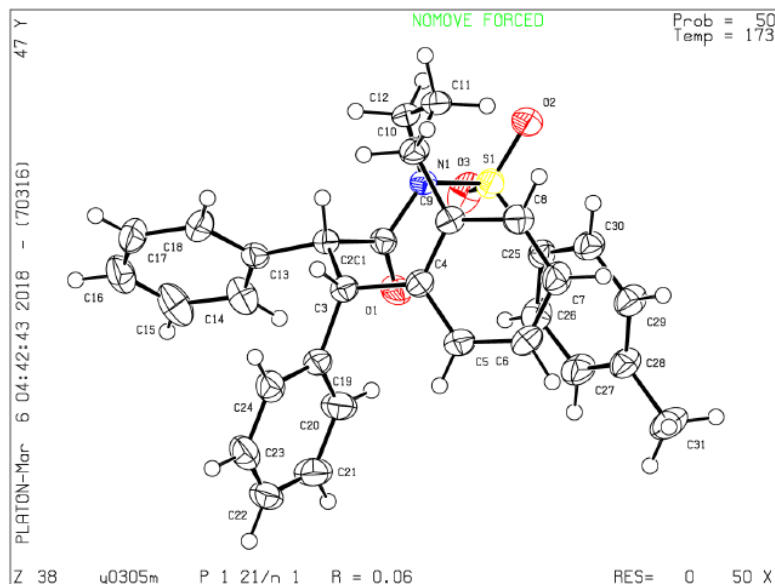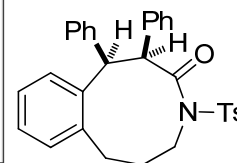

Bond precision: C-C = 0.0032 Å

Wavelength=0.71073

Cell: a=8.5854 (16) b=21.341 (4) c=14.045 (3)  
alpha=90 beta=104.004 (3) gamma=90  
Temperature: 173 K

|                        | Calculated     | Reported       |
|------------------------|----------------|----------------|
| Volume                 | 2496.9 (8)     | 2496.9 (8)     |
| Space group            | P 21/n         | P 1 21/n 1     |
| Hall group             | -P 2yn         | -P 2yn         |
| Moiety formula         | C31 H29 N O3 S | C31 H29 N O3 S |
| Sum formula            | C31 H29 N O3 S | C31 H29 N O3 S |
| Mr                     | 495.61         | 495.61         |
| Dx, g cm <sup>-3</sup> | 1.318          | 1.318          |
| Z                      | 4              | 4              |
| Mu (mm <sup>-1</sup> ) | 0.164          | 0.164          |
| F000                   | 1048.0         | 1048.0         |
| F000'                  | 1048.92        |                |
| h, k, lmax             | 11, 27, 18     | 11, 27, 18     |
| Nref                   | 5725           | 5671           |
| Tmin, Tmax             | 0.971, 0.984   |                |
| Tmin'                  | 0.968          |                |

Correction method= Not given

Data completeness= 0.991 Theta (max)= 27.485

R(reflections)= 0.0576 ( 5280) wR2(reflections)= 0.1431 ( 5671)

S = 1.160

Npar= 346

**Supplementary Table 6. Crystal data and structure refinement for 2*p-ent*. CCDC  
Number = 1887308**

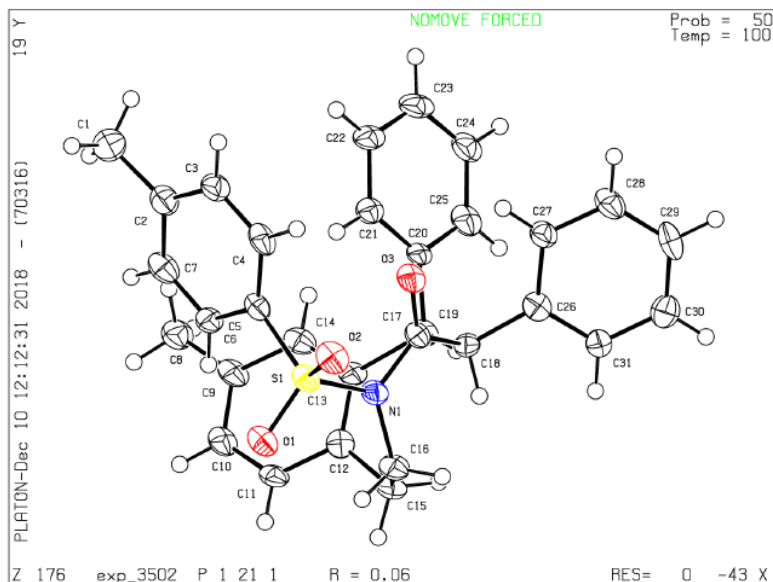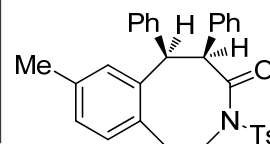

Bond precision: C-C = 0.0098 Å

Wavelength=1.54184

Cell: a=11.6192 (7) b=8.1266 (4) c=13.9581 (6)  
 alpha=90 beta=107.818 (6) gamma=90  
 Temperature: 100 K

|                        | Calculated     | Reported       |
|------------------------|----------------|----------------|
| Volume                 | 1254.77 (12)   | 1254.77 (12)   |
| Space group            | P 21           | P 1 21 1       |
| Hall group             | P 2yb          | P 2yb          |
| Moiety formula         | C31 H29 N O3 S | C31 H29 N O3 S |
| Sum formula            | C31 H29 N O3 S | C31 H29 N O3 S |
| Mr                     | 495.61         | 495.61         |
| Dx, g cm <sup>-3</sup> | 1.312          | 1.312          |
| Z                      | 2              | 2              |
| Mu (mm <sup>-1</sup> ) | 1.412          | 1.412          |
| F000                   | 524.0          | 524.0          |
| F000'                  | 526.08         |                |
| h, k, lmax             | 13, 9, 16      | 13, 9, 16      |
| Nref                   | 4280 [ 2308]   | 3877           |
| Tmin, Tmax             | 0.868, 0.932   | 0.784, 1.000   |
| Tmin'                  | 0.868          |                |

Correction method= # Reported T Limits: Tmin=0.784 Tmax=1.000  
 AbsCorr = MULTI-SCAN

Data completeness= 1.68/0.91 Theta (max)= 65.085

R(reflections)= 0.0611 ( 3285) wR2(reflections)= 0.1517 ( 3877)

S = 1.036

Npar= 327

Supplementary Table 7. Crystal data and structure refinement for 6ag. CCDC  
Number = 1887311

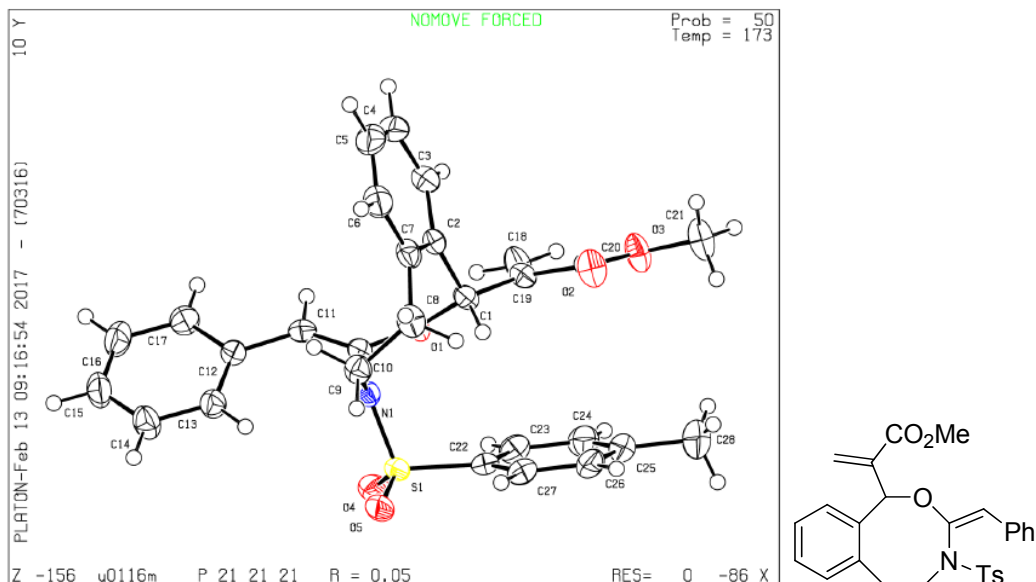

Bond precision: C-C = 0.0045 Å

Wavelength=0.71073

Cell: a=11.0930 (19) Å, b=11.2707 (19) Å, c=19.181 (3) Å  
alpha=90, beta=90, gamma=90  
Temperature: 173 K

|                        | Calculated     | Reported       |
|------------------------|----------------|----------------|
| Volume                 | 2398.1 (7)     | 2398.2 (7)     |
| Space group            | P 21 21 21     | P 21 21 21     |
| Hall group             | P 2ac 2ab      | P 2ac 2ab      |
| Moiety formula         | C28 H27 N O5 S | C28 H27 N O5 S |
| Sum formula            | C28 H27 N O5 S | C28 H27 N O5 S |
| Mr                     | 489.57         | 489.56         |
| Dx, g cm <sup>-3</sup> | 1.356          | 1.356          |
| Z                      | 4              | 4              |
| Mu (mm <sup>-1</sup> ) | 0.176          | 0.176          |
| F000                   | 1032.0         | 1032.0         |
| F000'                  | 1032.98        |                |
| h, k, lmax             | 14, 15, 25     | 15, 15, 25     |
| Nref                   | 6173 [ 3466]   | 5752           |
| Tmin, Tmax             | 0.869, 0.900   |                |
| Tmin'                  | 0.869          |                |

Correction method= Not given

Data completeness= 1.66/0.93 Theta (max)= 28.672

R(reflections)= 0.0466 ( 4935) wR2(reflections)= 0.1103 ( 5752)

S = 1.023 Npar= 318

**Supplementary Table 8. The cytotoxic effects of the newly synthesized medium-sized lactam compounds against cancer cells<sup>a</sup>**

| Cmpd ID | Cell viability at 20 $\mu$ M (%) |         |          |        |            |
|---------|----------------------------------|---------|----------|--------|------------|
|         | A375                             | SK-GT-4 | KYSE-450 | MCF-7  | MDA-MB-231 |
| 2a      | 87.88                            | 77.59   | 90.68    | 87.25  | 95.63      |
| 2b      | 51.93                            | 71.03   | 87.66    | 86.65  | 104.44     |
| 2c      | 43.67                            | 67.15   | 62.13    | 61.99  | 111.49     |
| 2d      | 11.95                            | 55.26   | 86.15    | 61.95  | 110.85     |
| 2e      | 65.28                            | 81.64   | 79.19    | 80.81  | 116.52     |
| 2f      | 67.52                            | 88.55   | 80.15    | 75.58  | 115.89     |
| 2g      | 81.66                            | 91.13   | 86.09    | 84.81  | 109.12     |
| 2h      | 39.66                            | 98.32   | 92.16    | 64.58  | 121.84     |
| 2i      | 78.06                            | 82.88   | 88.96    | 87.24  | 102.28     |
| 2j      | 74.75                            | 82.53   | 88.68    | 89.13  | 90.63      |
| 2k      | 74.78                            | 85.23   | 90.19    | 88.56  | 107.79     |
| 2l      | 67.43                            | 90.09   | 85.34    | 81.45  | 98.51      |
| 2m      | 98.09                            | 94.38   | 83.10    | 91.14  | 97.06      |
| 2n      | 72.46                            | 87.47   | 84.59    | 92.49  | 93.68      |
| 2o      | 85.99                            | 99.47   | 87.11    | 89.20  | 104.61     |
| 2p      | 52.70                            | 86.39   | 80.07    | 78.64  | 99.63      |
| 2q      | 45.77                            | 68.96   | 73.07    | 82.75  | 98.46      |
| 2r      | 46.93                            | 70.24   | 79.37    | 84.03  | 99.54      |
| 2s      | 23.63                            | 80.55   | 86.28    | 92.71  | 91.45      |
| 2t      | 73.81                            | 71.61   | 82.42    | 94.27  | 82.21      |
| 2u      | 38.85                            | 53.22   | 57.54    | 63.78  | 102.61     |
| 2v      | 46.54                            | 62.52   | 65.04    | 78.32  | 112.98     |
| 2w      | 55.09                            | 71.57   | 81.04    | 76.14  | 94.17      |
| 2x      | 77.52                            | 71.09   | 83.22    | 91.31  | 91.38      |
| 2y      | 45.26                            | 62.19   | 67.50    | 63.29  | 104.77     |
| 2z      | 69.59                            | 85.32   | 75.67    | 95.72  | 86.32      |
| 2aa     | 19.13                            | 60.79   | 87.83    | 88.07  | 94.56      |
| 2ab     | 54.69                            | 77.65   | 71.69    | 81.17  | 101.28     |
| 2ac     | 19.11                            | 30.03   | 71.57    | 50.08  | 74.08      |
| 2ad     | 23.90                            | 87.75   | 89.07    | 67.61  | 86.27      |
| 2ae     | 76.10                            | 73.44   | 84.68    | 88.10  | 84.18      |
| 2ah     | 15.80                            | 24.88   | 62.02    | 57.02  | 63.87      |
| 2ai     | 85.76                            | 78.22   | 81.78    | 95.87  | 94.42      |
| 2aj     | 86.04                            | 87.62   | 71.29    | 104.29 | 93.82      |
| 2ak     | 17.55                            | 94.65   | 89.75    | 99.09  | 94.83      |
| 2al     | 18.01                            | 74.82   | 91.44    | 71.96  | 89.83      |
| 2am     | 18.14                            | 97.43   | 93.84    | 46.68  | 99.89      |
| 2p-ent  | 87.19                            | 43.30   | 68.71    | 99.45  | 93.46      |
| 3a      | 75.00                            | 37.16   | 83.94    | 98.68  | 96.47      |
| 4a      | 68.80                            | 104.40  | 90.05    | 77.19  | 93.89      |
| 5a      | 22.70                            | 109.48  | 87.84    | 103.03 | 104.69     |

<sup>a</sup> Results are average of two experiments.

**Supplementary Table 9. Selectivity factor for this chiral Brønsted acid-catalyzed kinetic resolution**

| <b>Product</b> | <b>Conversion (%)</b> | <b>Ee of product (%)</b> | <b><i>S</i> from product</b> |
|----------------|-----------------------|--------------------------|------------------------------|
| <b>2p-ent</b>  | 48                    | 90                       | 49.4                         |
| <b>2r-ent</b>  | 45                    | 87                       | 30.6                         |
| <b>2t-ent</b>  | 54                    | 85                       | 81.8                         |
| <b>2w-ent</b>  | 55                    | 80                       | 39.5                         |
| <b>2z-ent</b>  | 50                    | 86                       | 36.6                         |
| <b>2ab-ent</b> | 51                    | 92                       | 93.0                         |
| <b>2a-ent</b>  | 51                    | 78                       | 20.0                         |
| <b>2u-ent</b>  | 49                    | 78                       | 18.0                         |

## Supplementary Methods

### General Information

Unless otherwise noted, materials were obtained commercially and used without further purification. All the solvents were treated according to general methods. Flash column chromatography was performed over silica gel (300-400 mesh).  $^1\text{H}$  NMR spectra and  $^{13}\text{C}$  NMR spectra were recorded on a Bruker AV-400 spectrometer and a Bruker AV-500 spectrometer in chloroform- $d_3$ . For  $^1\text{H}$  NMR spectra, chemical shifts are reported in ppm with the internal TMS signal at 0.0 ppm as a standard. For  $^{13}\text{C}$  NMR spectra, chemical shifts are reported in ppm with the internal chloroform signal at 77.0 ppm as a standard. Infrared spectra were recorded on a Nicolet AVATER FTIR330 spectrometer as thin film and are reported in reciprocal centimeter ( $\text{cm}^{-1}$ ). Mass spectra were recorded with Micromass QTOF2 Quadrupole/Time-of-Flight Tandem mass spectrometer using electron spray ionization.

### Cell Viability Assay

We also tested the newly synthesized 3-benzazocinones for their bioactivity as antitumor agents. The cytotoxic effects of these compounds were evaluated against a panel of cancer cells, including melanoma cells A375, esophageal cancer cells SK-GT-4 and KYSE-450, and breast cancer cells MCF-7 and MDA-MB-231 by the use of cell viability assay, using a commercially available proliferation assay kit (Promega, US). Briefly, the cells were plated in 96-well culture plates at an appropriate density in culture medium and allowed to attach overnight. After treatment of vehicle (0.1% DMSO as control) or test compounds for indicated times and concentrations, 20  $\mu\text{L}$  of MTS reaction solution (3-(4, 5-dimethylthiazol-2-yl)-5-(3-carboxymethoxyphenyl)-2-(4-sulfophenyl)-2H-tetrazolium, inner salt; MTS (a) and 100  $\mu\text{g}/\text{mL}$  phenazine methosulfate; PES) was added to each well. The absorbance values were read at 490 nm wavelength with a spectrophotometer (Varioskan Flash, Thermo, US) after 1 to 4 hours incubation. The cell viability was calculated as: cell survival =  $(\text{OD}_{\text{compd.}} - \text{OD}_{\text{blank}})/(\text{OD}_{\text{control}} - \text{OD}_{\text{blank}}) * 100\%$ . The relevant results are summarized in Supplementary Table 8.

Compounds **1a-1p**, **1u**, **1w**, **1y-z** were prepared according to the following procedures.<sup>1-3</sup>

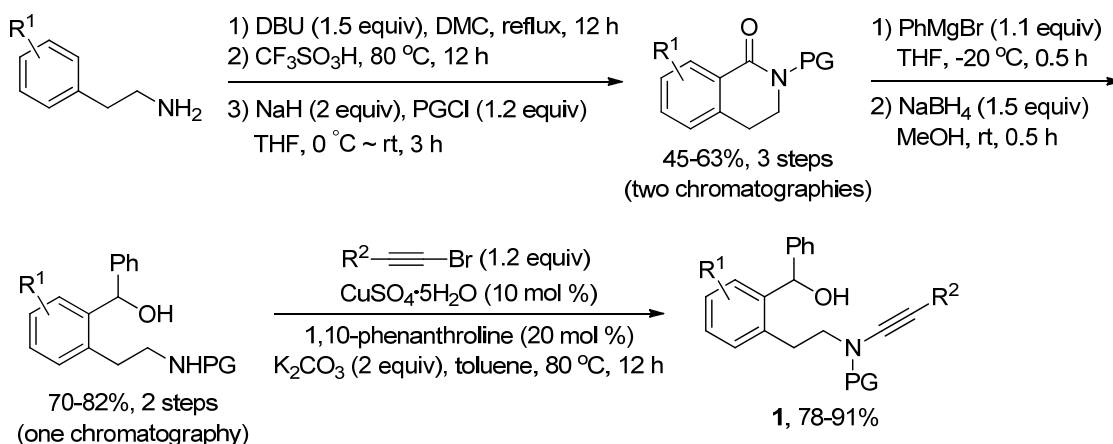

**Supplementary Figure 130.** Procedures for the preparation of ynamides **1a-1p**, **1u**, **1w**, **1y-z**.

***N*-(2-(hydroxy(phenyl)methyl)phenethyl)-4-methyl-*N*-(phenylethynyl)benzenesulfonamide (1a)**

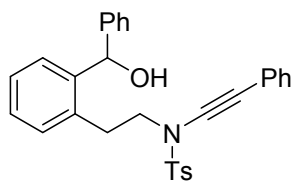

**1a**

Pale yellow oil. <sup>1</sup>H NMR (500 MHz, CDCl<sub>3</sub>) δ 7.71 (d, *J* = 8.5 Hz, 2H), 7.42 (dd, *J* = 7.5 Hz, *J* = 2.0 Hz, 1H), 7.38 – 7.33 (m, 2H), 7.28 – 7.14 (m, 13H), 6.01 (s, 1H), 3.52 (ddd, *J* = 16.0 Hz, *J* = 10.0 Hz, *J* = 6.0 Hz, 1H), 3.42 (ddd, *J* = 16.0 Hz, *J* = 9.5 Hz, *J* = 6.0 Hz, 1H), 3.04 (ddd, *J* = 15.5 Hz, *J* = 9.5 Hz, *J* = 6.0 Hz, 1H), 2.96 (ddd, *J* = 16.0 Hz, *J* = 10.0 Hz, *J* = 6.0 Hz, 1H), 2.66 (s, 1H), 2.38 (s, 3H); <sup>13</sup>C NMR (125 MHz, CDCl<sub>3</sub>) δ 144.5, 143.0, 141.6, 134.9, 134.4, 131.4, 130.4, 129.7, 128.3, 128.2, 127.8(2), 127.8(0), 127.5, 127.4, 127.3, 127.1, 126.8, 122.6, 82.2, 72.8, 71.0, 52.4, 31.3, 21.5; IR (neat): 3438(bs), 2930, 2234(s), 1493, 1364, 1168, 1089, 755, 691, 597, 546; HRESIMS Calcd for [C<sub>30</sub>H<sub>27</sub>NNaO<sub>3</sub>S]<sup>+</sup> (M + Na<sup>+</sup>) 504.1604, found 504.1604.

***N*-(2-(hydroxy(phenyl)methyl)phenethyl)-*N*-(phenylethynyl)benzenesulfonamide (1b)**



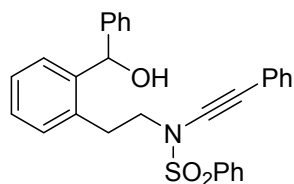

**1b**

Pale yellow oil.  $^1\text{H}$  NMR (500 MHz,  $\text{CDCl}_3$ )  $\delta$  7.85 (d,  $J = 7.5$  Hz, 2H), 7.65 – 7.59 (m, 1H), 7.53 – 7.48 (m, 2H), 7.46 (dd,  $J = 7.0$  Hz,  $J = 1.5$  Hz, 1H), 7.38 – 7.34 (m, 2H), 7.32 – 7.28 (m, 5H), 7.27 – 7.18 (m, 6H), 6.07 (s, 1H), 3.58 (ddd,  $J = 16.0$  Hz,  $J = 10.0$  Hz,  $J = 6.0$  Hz, 1H), 3.48 (ddd,  $J = 16.0$  Hz,  $J = 10.0$  Hz,  $J = 6.5$  Hz, 1H), 3.09 (ddd,  $J = 15.5$  Hz,  $J = 9.5$  Hz,  $J = 6.0$  Hz, 1H), 3.00 (ddd,  $J = 16.0$  Hz,  $J = 10.0$  Hz,  $J = 6.5$  Hz, 1H), 2.36 (s, 1H);  $^{13}\text{C}$  NMR (125 MHz,  $\text{CDCl}_3$ )  $\delta$  143.0, 141.7, 137.5, 135.0, 133.6, 131.6, 130.6, 129.1, 128.5, 128.3, 128.0, 127.9, 127.6, 127.5, 127.3, 126.9, 122.6, 82.0, 73.0, 71.1, 52.6, 31.5; IR (neat): 3440(br), 2955, 2922, 2235(s), 1448, 1364, 1170, 753, 688, 571; HRESIMS Calcd for  $[\text{C}_{29}\text{H}_{25}\text{NNaO}_3\text{S}]^+$  ( $\text{M} + \text{Na}^+$ ) 490.1447, found 490.1449.

**4-bromo-*N*-(2-(hydroxy(phenyl)methyl)phenethyl)-*N*-(phenylethynyl)benzenesulfonamide (1c)**

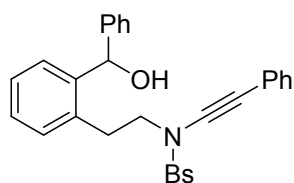

**1c**

Yellow oil.  $^1\text{H}$  NMR (400 MHz,  $\text{CDCl}_3$ )  $\delta$  7.65 (d,  $J = 8.8$  Hz, 2H), 7.59 (d,  $J = 8.8$  Hz, 2H), 7.43 (dd,  $J = 7.6$  Hz,  $J = 1.6$  Hz, 1H), 7.40 – 7.34 (m, 2H), 7.33 – 7.12 (m, 11H), 6.03 (s, 1H), 3.53 (ddd,  $J = 15.6$  Hz,  $J = 9.6$  Hz,  $J = 6.4$  Hz, 1H), 3.44 (ddd,  $J = 15.6$  Hz,  $J = 9.2$  Hz,  $J = 6.4$  Hz, 1H), 3.12 – 2.91 (m, 2H), 2.56 (s, 1H);  $^{13}\text{C}$  NMR (100 MHz,  $\text{CDCl}_3$ )  $\delta$  143.0, 141.6, 136.3, 134.8, 132.4, 131.6, 130.6, 128.9, 128.8, 128.4, 128.3, 128.1, 127.9, 127.6, 127.5, 127.2, 126.8, 122.3, 81.6, 73.1, 71.4, 52.6, 31.4; IR (neat): 3455(br), 2923, 2236(s), 1573, 1390, 1367, 1171, 756, 739, 609; HRESIMS Calcd for  $[\text{C}_{29}\text{H}_{24}\text{BrNNaO}_3\text{S}]^+$  ( $\text{M} + \text{Na}^+$ ) 568.0552, found 568.0560.

***N*-((4-fluorophenyl)ethynyl)-*N*-(2-(hydroxy(phenyl)methyl)phenethyl)-4-methylbenzenesulfonamide (1d)**

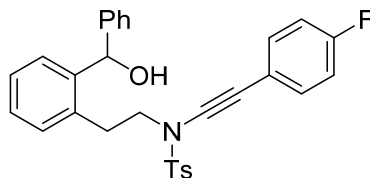

**1d**

Pale yellow oil.  $^1\text{H}$  NMR (500 MHz,  $\text{CDCl}_3$ )  $\delta$  7.71 (d,  $J = 8.5$  Hz, 2H), 7.43 (dd,  $J = 7.5$  Hz,  $J = 2.0$  Hz, 1H), 7.35 – 7.31 (m, 2H), 7.30 – 7.20 (m, 9H), 7.18 (dd,  $J = 7.0$  Hz,  $J = 1.5$  Hz, 1H), 7.02 – 6.95 (m, 2H), 6.04 (d,  $J = 4.0$  Hz, 1H), 3.54 (ddd,  $J = 16.0$  Hz,  $J = 10.0$  Hz,  $J = 6.0$  Hz, 1H), 3.46 (ddd,  $J = 15.5$  Hz,  $J = 9.5$  Hz,  $J = 6.0$  Hz, 1H), 3.06 (ddd,  $J = 15.5$  Hz,  $J = 10.0$  Hz,  $J = 6.0$  Hz, 1H), 2.98 (ddd,  $J = 15.5$  Hz,  $J = 9.5$  Hz,  $J = 6.0$  Hz, 1H), 2.46 (d,  $J = 4.0$  Hz, 1H), 2.42 (s, 3H);  $^{13}\text{C}$  NMR (125 MHz,  $\text{CDCl}_3$ )  $\delta$  162.3 (d,  $J = 247.8$  Hz), 144.6, 143.1, 141.7, 135.0, 134.6, 133.6 (d,  $J = 8.3$  Hz), 130.5, 129.8, 128.4, 127.9, 127.6, 127.5, 127.2, 126.8, 118.7 (d,  $J = 3.6$  Hz), 115.5 (d,  $J = 22.0$  Hz), 81.9, 73.0, 70.0, 52.5, 31.5, 21.6; IR (neat): 3449(bs), 2954, 2923, 2229(s), 1460, 1376, 1167, 699, 658, 543; HRESIMS Calcd for  $[\text{C}_{30}\text{H}_{26}\text{FNNaO}_3\text{S}]^+$  ( $\text{M} + \text{Na}^+$ ) 522.1510, found 522.1511.

***N*-((4-chlorophenyl)ethynyl)-*N*-(2-(hydroxy(phenyl)methyl)phenethyl)-4-methylbenzenesulfonamide (1e)**

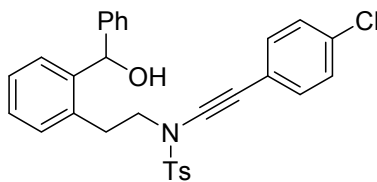

**1e**

Pale yellow oil.  $^1\text{H}$  NMR (400 MHz,  $\text{CDCl}_3$ )  $\delta$  7.69 (d,  $J = 8.4$  Hz, 2H), 7.43 – 7.37 (m, 1H), 7.31 – 7.11 (m, 14H), 5.99 (s, 1H), 3.51 (ddd,  $J = 15.6$  Hz,  $J = 9.6$  Hz,  $J = 6.0$  Hz, 1H), 3.42 (ddd,  $J = 15.6$  Hz,  $J = 9.2$  Hz,  $J = 6.0$  Hz, 1H), 3.08 – 2.90 (m, 2H), 2.79 (s, 1H), 2.38 (s, 3H);  $^{13}\text{C}$  NMR (100 MHz,  $\text{CDCl}_3$ )  $\delta$  144.6, 143.0, 141.6, 134.8, 134.3, 133.7, 132.5, 130.4, 129.7, 128.5, 128.3, 127.8, 127.5, 127.4, 127.3, 127.0, 126.7, 121.1, 83.1, 72.8, 70.0, 52.3, 31.3, 21.5; IR (neat): 3536(bs), 3061, 3026, 2235(s), 1597, 1492, 1448,

1363, 1168, 755, 547; HRESIMS Calcd for  $[C_{30}H_{26}ClNNaO_3S]^+$  ( $M + Na^+$ ) 538.1214, found 538.1220.

***N*-((4-bromophenyl)ethynyl)-*N*-(2-(hydroxy(phenyl)methyl)phenethyl)-4-methylbenzenesulfonamide (1f)**

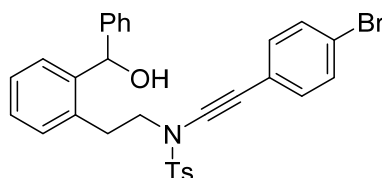

**1f**

Pale yellow oil.  $^1H$  NMR (400 MHz,  $CDCl_3$ )  $\delta$  7.71 (d,  $J = 8.4$  Hz, 2H), 7.47 – 7.39 (m, 3H), 7.31 – 7.16 (m, 12H), 6.05 (s, 1H), 3.55 (ddd,  $J = 16.0$  Hz,  $J = 9.6$  Hz,  $J = 6.0$  Hz, 1H), 3.47 (ddd,  $J = 15.6$  Hz,  $J = 9.2$  Hz,  $J = 6.4$  Hz, 1H), 3.07 (ddd,  $J = 15.2$  Hz,  $J = 9.6$  Hz,  $J = 6.4$  Hz, 1H), 2.98 (ddd,  $J = 16.0$  Hz,  $J = 9.6$  Hz,  $J = 6.0$  Hz, 1H), 2.42 (s, 3H), 2.40 (s, 1H);  $^{13}C$  NMR (100 MHz,  $CDCl_3$ )  $\delta$  144.7, 143.1, 141.7, 135.0, 134.6, 132.8, 131.5, 130.5, 129.8, 128.5, 128.0, 127.5(9), 127.5(7), 127.5(3), 127.2, 126.8, 122.0, 121.7, 83.4, 73.0, 70.2, 52.5, 31.5, 21.6; IR (neat): 3438(bs), 3063, 2924, 2236(s), 1599, 1488, 1364, 1168, 1088, 701, 657, 562; HRESIMS Calcd for  $[C_{30}H_{26}BrNNaO_3S]^+$  ( $M + Na^+$ ) 582.0709, found 582.0709.

***N*-((4-cyanophenyl)ethynyl)-*N*-(2-(hydroxy(phenyl)methyl)phenethyl)-4-methylbenzenesulfonamide (1g)**

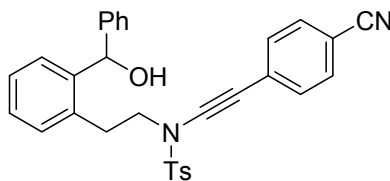

**1g**

Pale yellow oil.  $^1H$  NMR (400 MHz,  $CDCl_3$ )  $\delta$  7.71 (d,  $J = 8.4$  Hz, 2H), 7.52 (d,  $J = 8.4$  Hz, 2H), 7.44 – 7.39 (m, 1H), 7.36 (d,  $J = 8.4$  Hz, 2H), 7.31 – 7.19 (m, 9H), 7.18 – 7.13 (m, 1H), 6.02 (s, 1H), 3.61 – 3.42 (m, 2H), 3.10 – 2.93 (m, 2H), 2.78 (s, 1H), 2.41 (s, 3H);  $^{13}C$  NMR (100 MHz,  $CDCl_3$ )  $\delta$  145.0, 143.0, 141.6, 134.7, 134.2, 131.9, 130.9, 130.4, 129.8, 128.3, 127.9, 127.8, 127.7, 127.4, 127.3, 127.2, 126.7, 118.5, 110.4, 87.0, 72.9,

70.6, 52.3, 31.4, 21.5; IR (neat): 3464(bs), 3063, 2224(s), 1450, 1367, 1169, 1089, 700, 660, 543; HRESIMS Calcd for  $[C_{31}H_{26}N_2NaO_3S]^+$  ( $M + Na^+$ ) 529.1556, found 529.1554.

***N*-(2-(hydroxy(phenyl)methyl)phenethyl)-4-methyl-*N*-((4-(trifluoromethyl)phenyl)ethynyl)benzenesulfonamide (1h)**

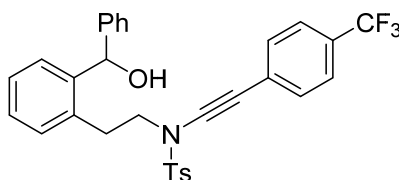

**1h**

Pale yellow oil.  $^1H$  NMR (500 MHz,  $CDCl_3$ )  $\delta$  7.71 (d,  $J = 8.5$  Hz, 2H), 7.52 (d,  $J = 8.0$  Hz, 2H), 7.45 – 7.37 (m, 3H), 7.29 – 7.19 (m, 9H), 7.18 – 7.15 (m, 1H), 6.02 (d,  $J = 3.0$  Hz, 1H), 3.55 (ddd,  $J = 16.0$  Hz,  $J = 10.0$  Hz,  $J = 6.5$  Hz, 1H), 3.47 (ddd,  $J = 15.5$  Hz,  $J = 9.5$  Hz,  $J = 6.0$  Hz, 1H), 3.06 (ddd,  $J = 15.5$  Hz,  $J = 9.5$  Hz,  $J = 6.0$  Hz, 1H), 2.99 (ddd,  $J = 16.0$  Hz,  $J = 10.0$  Hz,  $J = 6.5$  Hz, 1H), 2.67 (d,  $J = 3.5$  Hz, 1H), 2.40 (s, 3H);  $^{13}C$  NMR (125 MHz,  $CDCl_3$ )  $\delta$  144.9, 143.0, 141.7, 134.9, 134.4, 131.0, 130.5, 129.8, 128.4, 127.9, 127.6, 127.5, 127.4, 127.2, 126.8, 126.7, 125.1 (q,  $J = 3.5$  Hz), 125.0, 122.8, 84.9, 73.0, 70.4, 52.4, 31.5, 21.5; IR (neat): 3434(bs), 2927, 2234(s), 1598, 1367, 1322, 1065, 742, 601, 563; HRESIMS Calcd for  $[C_{31}H_{26}F_3NNaO_3S]^+$  ( $M + Na^+$ ) 572.1478, found 572.1481.

***N*-(2-(hydroxy(phenyl)methyl)phenethyl)-4-methyl-*N*-(*p*-tolylethynyl)benzenesulfonamide (1i)**

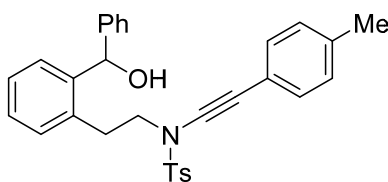

**1i**

Pale yellow oil.  $^1H$  NMR (400 MHz,  $CDCl_3$ )  $\delta$  7.71 (d,  $J = 8.4$  Hz, 2H), 7.46 – 7.42 (m, 1H), 7.30 – 7.19 (m, 11H), 7.19 – 7.15 (m, 1H), 7.10 (d,  $J = 8.0$  Hz, 2H), 6.04 (s, 1H), 3.53 (ddd,  $J = 16.0$  Hz,  $J = 10.0$  Hz,  $J = 6.0$  Hz, 1H), 3.43 (ddd,  $J = 15.6$  Hz,  $J = 9.6$  Hz,  $J = 6.4$  Hz, 1H), 3.06 (ddd,  $J = 15.6$  Hz,  $J = 9.6$  Hz,  $J = 6.0$  Hz, 1H), 2.97 (ddd,  $J = 16.0$

Hz,  $J = 10.0$  Hz,  $J = 6.4$  Hz, 1H), 2.47 (s, 1H), 2.40 (s, 3H), 2.33 (s, 3H);  $^{13}\text{C}$  NMR (100 MHz,  $\text{CDCl}_3$ )  $\delta$  144.5, 143.1, 141.7, 138.1, 135.0, 134.6, 131.6, 130.5, 129.7, 129.0, 128.4, 127.9, 127.6, 127.4, 127.1, 126.9, 119.5, 81.5, 72.9, 71.0, 52.5, 31.4, 21.5, 21.4; IR (neat): 3438(bs), 2954, 2923, 2235(s), 1597, 1364, 1167, 1089, 755, 691, 587; HRESIMS Calcd for  $[\text{C}_{31}\text{H}_{29}\text{NNaO}_3\text{S}]^+$  ( $\text{M} + \text{Na}^+$ ) 518.1760, found 518.1758.

***N*-(2-(hydroxy(phenyl)methyl)phenethyl)-*N*-((4-methoxyphenyl)ethynyl)-4-methylbenzenesulfonamide (1j)**

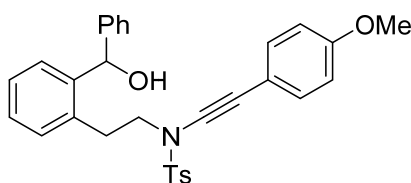

**1j**

Pale yellow oil.  $^1\text{H}$  NMR (400 MHz,  $\text{CDCl}_3$ )  $\delta$  7.72 (d,  $J = 8.4$  Hz, 2H), 7.49 – 7.43 (m, 1H), 7.34 – 7.18 (m, 12H), 6.84 (d,  $J = 8.8$  Hz, 2H), 6.07 (s, 1H), 3.81 (s, 3H), 3.55 (ddd,  $J = 15.6$  Hz,  $J = 9.6$  Hz,  $J = 6.0$  Hz, 1H), 3.45 (ddd,  $J = 15.6$  Hz,  $J = 9.6$  Hz,  $J = 6.4$  Hz, 1H), 3.08 (ddd,  $J = 15.6$  Hz,  $J = 9.6$  Hz,  $J = 6.0$  Hz, 1H), 2.98 (ddd,  $J = 16.0$  Hz,  $J = 10.0$  Hz,  $J = 6.0$  Hz, 1H), 2.43 (s, 3H), 2.34 (s, 1H);  $^{13}\text{C}$  NMR (100 MHz,  $\text{CDCl}_3$ )  $\delta$  159.6, 144.5, 143.1, 141.7, 135.1, 134.7, 133.6, 130.6, 129.7, 128.5, 127.9, 127.6, 127.5, 127.4, 127.2, 126.9, 114.6, 114.0, 80.8, 72.9, 70.7, 55.3, 52.7, 31.5, 21.6; IR (neat): 3421(bs), 2935, 2848, 2242(s), 1511, 1361, 1248, 1167, 1030, 666, 545; HRESIMS Calcd for  $[\text{C}_{31}\text{H}_{29}\text{NNaO}_4\text{S}]^+$  ( $\text{M} + \text{Na}^+$ ) 534.1710, found 534.1710.

***N*-((3-bromophenyl)ethynyl)-*N*-(2-(hydroxy(phenyl)methyl)phenethyl)-4-methylbenzenesulfonamide (1k)**

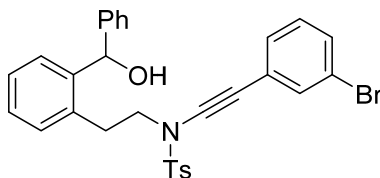

**1k**

Pale yellow oil.  $^1\text{H}$  NMR (400 MHz,  $\text{CDCl}_3$ )  $\delta$  7.71 (d,  $J = 8.4$  Hz, 2H), 7.48 – 7.46 (m, 1H), 7.45 – 7.42 (m, 1H), 7.41 – 7.38 (m, 1H), 7.31 – 7.21 (m, 10H), 7.19 – 7.12 (m, 2H),

6.04 (d,  $J = 4.0$  Hz, 1H), 3.55 (ddd,  $J = 16.0$  Hz,  $J = 9.6$  Hz,  $J = 6.0$  Hz, 1H), 3.46 (ddd,  $J = 15.6$ , 9.2, 6.0 Hz, 1H), 3.05 (ddd,  $J = 15.6$  Hz,  $J = 9.2$  Hz,  $J = 6.4$  Hz, 1H), 2.97 (ddd,  $J = 16.0$ , 10.0, 6.4 Hz, 1H), 2.45 (d,  $J = 4.0$  Hz, 1H), 2.42 (s, 3H);  $^{13}\text{C}$  NMR (100 MHz,  $\text{CDCl}_3$ )  $\delta$  144.8, 143.0, 141.6, 134.9, 134.5, 133.9, 130.9, 130.5, 129.8, 129.7, 129.6, 128.5, 128.0, 127.6, 127.5, 127.2, 126.8, 124.8, 122.0, 83.6, 73.0, 69.9, 52.5, 31.5, 21.6; IR (neat): 3434(bs), 2922, 2855, 2234(s), 1449, 1367, 1167, 1088, 664, 544; HRESIMS Calcd for  $[\text{C}_{30}\text{H}_{26}\text{BrNNaO}_3\text{S}]^+$  ( $\text{M} + \text{Na}^+$ ) 582.0709, found 582.0708.

***N*-2-(hydroxy(phenyl)methyl)phenethyl-4-methyl-*N*-(*m*-tolylethynyl)benzenesulfonamide (1l)**

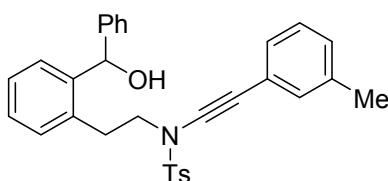

**1l**

Pale yellow oil.  $^1\text{H}$  NMR (400 MHz,  $\text{CDCl}_3$ )  $\delta$  7.72 (d,  $J = 8.4$  Hz, 2H), 7.47 – 7.41 (m, 1H), 7.31 – 7.16 (m, 13H), 7.13 – 7.07 (m, 1H), 6.06 (s, 1H), 3.55 (ddd,  $J = 15.6$  Hz,  $J = 9.6$  Hz,  $J = 5.6$  Hz, 1H), 3.46 (ddd,  $J = 15.6$  Hz,  $J = 9.6$  Hz,  $J = 6.0$  Hz, 1H), 3.08 (ddd,  $J = 15.2$  Hz,  $J = 9.2$  Hz,  $J = 6.0$  Hz, 1H), 2.99 (ddd,  $J = 16.0$  Hz,  $J = 10.0$  Hz,  $J = 6.4$  Hz, 1H), 2.41 (s, 3H), 2.31 (s, 3H);  $^{13}\text{C}$  NMR (100 MHz,  $\text{CDCl}_3$ )  $\delta$  144.5, 143.1, 141.7, 137.9, 135.1, 134.6, 132.1, 130.5, 129.7, 128.8, 128.5, 128.4, 128.2, 127.9, 127.6, 127.5, 127.2, 126.9, 122.5, 81.9, 72.9, 71.2, 52.6, 31.4, 21.6, 21.2; IR (neat): 3466(bs), 2925, 2850, 2237(s), 1496, 1447, 1359, 1167, 654, 591; HRESIMS Calcd for  $[\text{C}_{31}\text{H}_{29}\text{NNaO}_3\text{S}]^+$  ( $\text{M} + \text{Na}^+$ ) 518.1760, found 518.1762.

***N*-2-(hydroxy(phenyl)methyl)phenethyl-4-methyl-*N*-(naphthalen-2-ylethynyl)benzenesulfonamide (1m)**

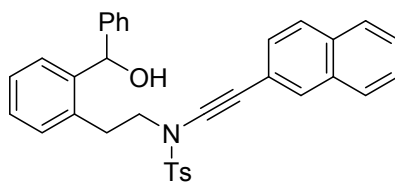

**1m**

Pale yellow oil.  $^1\text{H}$  NMR (500 MHz,  $\text{CDCl}_3$ )  $\delta$  7.85 (s, 1H), 7.78 – 7.69 (m, 5H), 7.46 – 7.37 (m, 4H), 7.28 – 7.14 (m, 10H), 6.03 (d,  $J = 3.5$  Hz, 1H), 3.56 (ddd,  $J = 15.5$  Hz,  $J = 10.0$  Hz,  $J = 6.0$  Hz, 1H), 3.47 (ddd,  $J = 16.0$  Hz,  $J = 9.5$  Hz,  $J = 6.5$  Hz, 1H), 3.08 (ddd,  $J = 15.5$  Hz,  $J = 9.5$  Hz,  $J = 6.0$  Hz, 1H), 3.00 (ddd,  $J = 16.0$  Hz,  $J = 9.5$  Hz,  $J = 6.0$  Hz, 1H), 2.69 (d,  $J = 4.0$  Hz, 1H), 2.35 (s, 3H);  $^{13}\text{C}$  NMR (125 MHz,  $\text{CDCl}_3$ )  $\delta$  144.6, 143.0, 141.6, 134.9, 134.4, 132.9, 132.4, 130.9, 130.4, 129.7, 128.3, 128.2, 127.8(4), 127.8(0), 127.6, 127.5, 127.4, 127.3, 127.1, 126.8, 126.4, 126.3, 119.9, 82.5, 72.8, 71.5, 52.4, 31.3, 21.5; IR (neat): 3518(bs), 2954, 2924, 2234(s), 1596, 1364, 1168, 1089, 756, 702, 696; HRESIMS Calcd for  $[\text{C}_{34}\text{H}_{29}\text{NNaO}_3\text{S}]^+$  ( $\text{M} + \text{Na}^+$ ) 554.1760, found 554.1760.

***N*-(2-(hydroxy(phenyl)methyl)phenethyl)-4-methyl-*N*-(thiophen-2-ylethynyl)benzenesulfonamide (1n)**

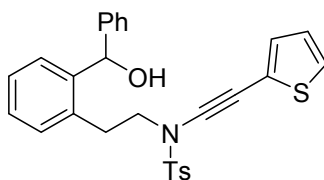

**1n**

Pale yellow oil.  $^1\text{H}$  NMR (500 MHz,  $\text{CDCl}_3$ )  $\delta$  7.68 (d,  $J = 8.0$  Hz, 2H), 7.43 (dd,  $J = 7.5$  Hz,  $J = 1.5$  Hz, 1H), 7.28 – 7.16 (m, 11H), 7.13 (dd,  $J = 7.0$  Hz,  $J = 1.5$  Hz, 1H), 6.95 (dd,  $J = 5.0$  Hz,  $J = 3.5$  Hz, 1H), 5.98 (s, 1H), 3.49 (ddd,  $J = 16.0$  Hz,  $J = 10.0$  Hz,  $J = 6.0$  Hz, 1H), 3.38 (ddd,  $J = 16.0$  Hz,  $J = 10.0$  Hz,  $J = 6.5$  Hz, 1H), 3.01 (ddd,  $J = 15.5$  Hz,  $J = 10.0$  Hz,  $J = 6.0$  Hz, 1H), 2.92 (ddd,  $J = 16.5$  Hz,  $J = 10.0$  Hz,  $J = 6.5$  Hz, 1H), 2.62 (s, 1H), 2.40 (s, 3H);  $^{13}\text{C}$  NMR (125 MHz,  $\text{CDCl}_3$ )  $\delta$  144.6, 143.0, 141.6, 134.8, 134.4, 133.1, 130.4, 129.7, 128.3, 127.8, 127.7, 127.5, 127.3(8), 127.3(6), 127.1, 127.0, 126.9, 122.7, 85.8, 72.9, 64.4, 52.5, 31.3, 21.5; IR (neat): 3451(bs), 2920, 2848, 2229(s), 1478, 1359, 1165, 1090, 671, 547; HRESIMS Calcd for  $[\text{C}_{28}\text{H}_{25}\text{NNaO}_3\text{S}_2]^+$  ( $\text{M} + \text{Na}^+$ ) 510.1168, found 510.1172.

***(E)*-(2-(hydroxy(phenyl)methyl)phenethyl)-4-methyl-*N*-(4-phenylbut-3-en-1-yn-1-yl)benzenesulfonamide (1o)**

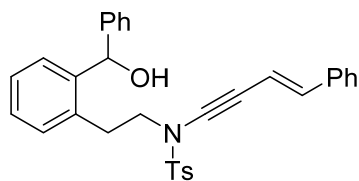

**1o**

Pale yellow oil.  $^1\text{H}$  NMR (500 MHz,  $\text{CDCl}_3$ )  $\delta$  7.69 (d,  $J = 8.5$  Hz, 2H), 7.44 – 7.39 (m, 1H), 7.33 (d,  $J = 7.5$  Hz, 2H), 7.31 – 7.18 (m, 12H), 7.16 – 7.13 (m, 1H), 6.82 (d,  $J = 16.0$  Hz, 1H), 6.24 (d,  $J = 16.0$  Hz, 1H), 6.00 (d,  $J = 2.5$  Hz, 1H), 3.49 (ddd,  $J = 16.0$  Hz,  $J = 10.0$  Hz,  $J = 6.0$  Hz, 1H), 3.39 (ddd,  $J = 15.5$  Hz,  $J = 9.5$  Hz,  $J = 6.0$  Hz, 1H), 3.01 (ddd,  $J = 15.5$  Hz,  $J = 10.0$  Hz,  $J = 6.0$  Hz, 1H), 2.93 (ddd,  $J = 16.0$  Hz,  $J = 10.0$  Hz,  $J = 6.5$  Hz, 1H), 2.73 (d,  $J = 3.0$  Hz, 1H), 2.37 (s, 3H);  $^{13}\text{C}$  NMR (125 MHz,  $\text{CDCl}_3$ )  $\delta$  144.5, 143.1, 141.6, 139.7, 136.2, 134.9, 134.4, 130.4, 129.7, 128.6, 128.3, 128.2, 127.8, 127.4(3), 127.3(9), 127.3(3), 127.0, 126.8, 125.9, 107.3, 84.2, 72.8, 70.7, 52.4, 31.3, 21.5; IR (neat): 3534(bs), 3027, 2923, 2217(s), 1596, 1448, 1361, 1166, 1088, 749, 692, 542; HRESIMS Calcd for  $[\text{C}_{32}\text{H}_{29}\text{NNaO}_3\text{S}]^+$  ( $\text{M} + \text{Na}^+$ ) 530.1760, found 530.1761.

***N*-(2-(hydroxy(phenyl)methyl)-4-methylphenethyl)-4-methyl-*N*-(phenylethynyl)benzenesulfonamide (1p)**

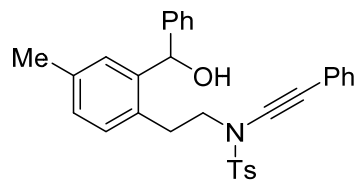

**1p**

Pale yellow oil.  $^1\text{H}$  NMR (500 MHz,  $\text{CDCl}_3$ )  $\delta$  7.71 (d,  $J = 8.0$  Hz, 2H), 7.37 – 7.33 (m, 2H), 7.28 – 7.17 (m, 11H), 7.05 (d,  $J = 7.5$  Hz, 1H), 7.01 (dd,  $J = 8.0$  Hz,  $J = 1.5$  Hz, 1H), 5.98 (d,  $J = 3.5$  Hz, 1H), 3.49 (ddd,  $J = 16.0$  Hz,  $J = 10.0$  Hz,  $J = 6.0$  Hz, 1H), 3.40 (ddd,  $J = 16.0$  Hz,  $J = 9.5$  Hz,  $J = 6.0$  Hz, 1H), 3.00 (ddd,  $J = 15.0$  Hz,  $J = 9.5$  Hz,  $J = 6.0$  Hz, 1H), 2.92 (ddd,  $J = 16.0$  Hz,  $J = 10.0$  Hz,  $J = 6.5$  Hz, 1H), 2.59 (d,  $J = 4.0$  Hz, 1H), 2.38 (s, 3H), 2.28 (s, 3H);  $^{13}\text{C}$  NMR (125 MHz,  $\text{CDCl}_3$ )  $\delta$  144.5, 143.1, 141.4, 136.6, 134.5, 131.8, 131.4, 130.4, 129.6, 128.5, 128.3, 128.2, 128.0, 127.8, 127.5, 127.3, 126.8, 122.6, 82.2, 72.8, 71.0, 52.5, 31.0, 21.5, 21.1; IR (neat): 3553(bs), 2923, 2877, 2234(s), 1597,



1493, 1363, 1090, 754, 691, 546; HRESIMS Calcd for  $[C_{31}H_{29}NNaO_3S]^+$  ( $M + Na^+$ ) 518.1760, found 518.1762.

Compounds **1q-1s**, **1x** were prepared according to the following procedures.<sup>1,3,4</sup>

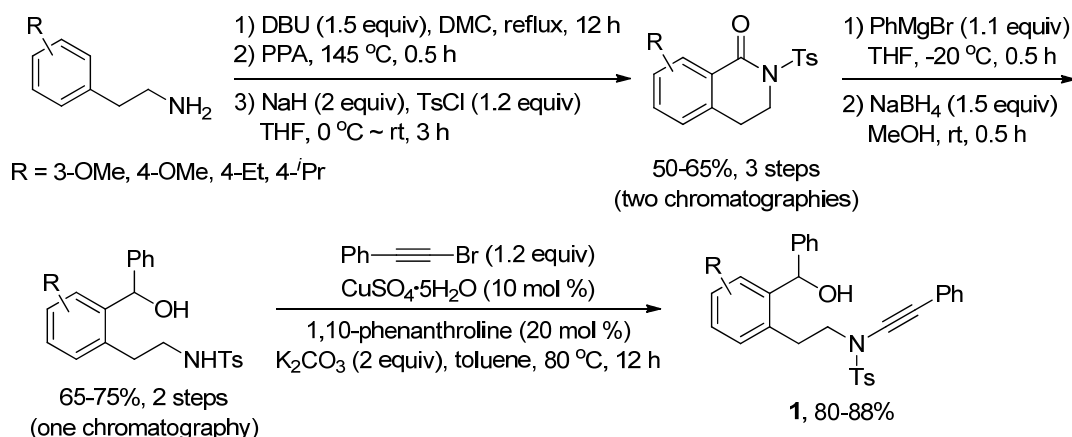

**Supplementary Figure 131.** Procedures for the preparation of ynamides **1q-1s**, **1x**.

*N*-(4-ethyl-2-(hydroxy(phenyl)methyl)phenethyl)-4-methyl-*N*-(phenylethynyl)benzenesulfonamide (**1q**)

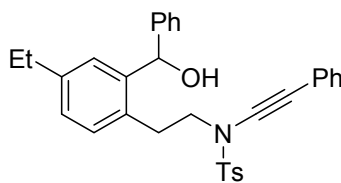

**1q**

Pale yellow oil. <sup>1</sup>H NMR (400 MHz, CDCl<sub>3</sub>) δ 7.72 (d, *J* = 8.4 Hz, 2H), 7.38 – 7.33 (m, 2H), 7.31 – 7.16 (m, 11H), 7.11 – 7.04 (m, 2H), 6.01 (d, *J* = 4.0 Hz, 1H), 3.50 (ddd, *J* = 16.0 Hz, *J* = 10.0 Hz, *J* = 6.0 Hz, 1H), 3.41 (ddd, *J* = 15.6 Hz, *J* = 9.6 Hz, *J* = 6.0 Hz, 1H), 3.01 (ddd, *J* = 15.6 Hz, *J* = 10.0 Hz, *J* = 6.4 Hz, 1H), 2.93 (ddd, *J* = 16.4 Hz, *J* = 10.0 Hz, *J* = 6.4 Hz, 1H), 2.60 (q, *J* = 7.6 Hz, 2H), 2.48 (d, *J* = 3.6 Hz, 1H), 2.40 (s, 3H), 1.19 (t, *J* = 7.6 Hz, 3H); <sup>13</sup>C NMR (100 MHz, CDCl<sub>3</sub>) δ 144.5, 143.1, 143.0, 141.4, 134.5, 132.0, 131.4, 130.5, 129.7, 128.4, 128.2, 127.8, 127.5, 127.4, 127.3, 126.9, 122.7, 82.3, 73.0, 71.0, 52.5, 31.0, 28.5, 21.5, 15.4; IR (neat): 3540(bs), 2963, 2928, 2235(s), 1493, 1363, 1167, 1090, 755, 691, 584; HRESIMS Calcd for  $[C_{32}H_{31}NNaO_3S]^+$  ( $M + Na^+$ ) 532.1917, found 532.1915.

***N*-(2-(hydroxy(phenyl)methyl)-4-isopropylphenethyl)-4-methyl-*N*-(phenylethynyl)benzenesulfonamide (1r)**

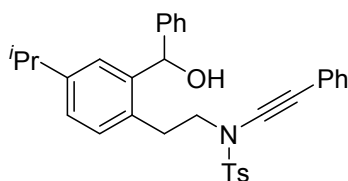

**1r**

Yellow oil.  $^1\text{H}$  NMR (400 MHz,  $\text{CDCl}_3$ )  $\delta$  7.71 (d,  $J = 8.4$  Hz, 2H), 7.38 – 7.32 (m, 3H), 7.30 – 7.14 (m, 10H), 7.11 – 7.06 (m, 2H), 5.99 (d,  $J = 3.6$  Hz, 1H), 3.47 (ddd,  $J = 16.0$  Hz,  $J = 10.0$  Hz,  $J = 6.0$  Hz, 1H), 3.38 (ddd,  $J = 16.0$  Hz,  $J = 10.0$  Hz,  $J = 6.4$  Hz, 1H), 3.04 – 2.88 (m, 2H), 2.88 – 2.79 (m, 1H), 2.62 (d,  $J = 3.6$  Hz, 1H), 2.38 (s, 3H), 1.20 (d,  $J = 7.2$  Hz, 6H);  $^{13}\text{C}$  NMR (100 MHz,  $\text{CDCl}_3$ )  $\delta$  147.6, 144.5, 143.1, 141.3, 134.3, 132.1, 131.3, 130.4, 129.6, 128.3, 128.2, 127.8, 127.5, 127.3, 126.8, 125.6, 125.5, 122.6, 82.2, 73.1, 70.9, 52.4, 33.7, 30.9, 23.9, 23.8, 21.5; IR (neat): 3438(bs), 2959, 2925, 2235(s), 1493, 1364, 1168, 756, 691, 586; HRESIMS Calcd for  $[\text{C}_{33}\text{H}_{33}\text{NNaO}_3\text{S}]^+$  ( $\text{M} + \text{Na}^+$ ) 546.2073, found 546.2072.

***N*-(2-(hydroxy(phenyl)methyl)-4-methoxyphenethyl)-4-methyl-*N*-(phenylethynyl)benzenesulfonamide (1s)**

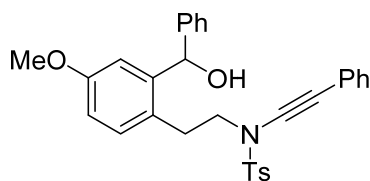

**1s**

Yellow oil.  $^1\text{H}$  NMR (400 MHz,  $\text{CDCl}_3$ )  $\delta$  7.69 (d,  $J = 8.4$  Hz, 2H), 7.38 – 7.32 (m, 2H), 7.28 – 7.14 (m, 10H), 7.08 – 7.01 (m, 2H), 6.72 (dd,  $J = 8.4$  Hz,  $J = 2.8$  Hz, 1H), 5.95 (s, 1H), 3.68 (s, 3H), 3.46 (ddd,  $J = 16.0$  Hz,  $J = 10.0$  Hz,  $J = 6.4$  Hz, 1H), 3.36 (ddd,  $J = 15.6$  Hz,  $J = 9.6$  Hz,  $J = 6.4$  Hz, 1H), 3.01 – 2.76 (m, 3H), 2.36 (s, 3H);  $^{13}\text{C}$  NMR (100 MHz,  $\text{CDCl}_3$ )  $\delta$  158.5, 144.5, 142.9, 142.8, 134.3, 131.4, 131.3, 129.6, 128.3, 128.1, 127.7, 127.4, 127.3, 126.8, 126.7, 122.6, 113.0, 112.8, 82.2, 72.7, 71.0, 55.0, 52.4, 30.4,

21.4; IR (neat): 3533(bs), 2926, 2234(s), 1495, 1364, 1167, 1089, 1043, 756, 586; HRESIMS Calcd for  $[C_{31}H_{29}NNaO_4S]^+$  ( $M + Na^+$ ) 534.1710, found 534.1714.

***N*-(2-(3-(hydroxy(phenyl)methyl)-[1,1'-biphenyl]-4-yl)ethyl)-4-methyl-*N*-(phenylethynyl)benzenesulfonamide (1t)**

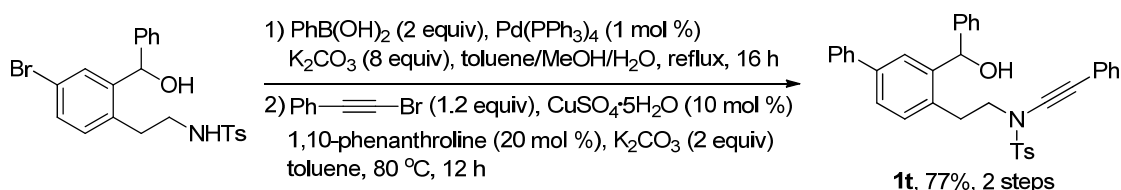

**Supplementary Figure 132.** Procedures for the preparation of ynamide **1t**.

Compound **1t** was prepared according to the above known procedures.<sup>1,3,5,6</sup> Pale yellow oil.  $^1H$  NMR (400 MHz,  $CDCl_3$ )  $\delta$  7.73 (d,  $J = 2.0$  Hz, 1H), 7.71 (d,  $J = 8.4$  Hz, 2H), 7.57 – 7.52 (m, 2H), 7.43 (dd,  $J = 7.6$  Hz,  $J = 2.0$  Hz, 1H), 7.41 – 7.33 (m, 4H), 7.32 – 7.17 (m, 12H), 6.07 (d,  $J = 3.2$  Hz, 1H), 3.55 (ddd,  $J = 15.6$  Hz,  $J = 9.6$  Hz,  $J = 6.4$  Hz, 1H), 3.46 (ddd,  $J = 15.6$  Hz,  $J = 9.2$  Hz,  $J = 6.4$  Hz, 1H), 3.12 – 2.94 (m, 2H), 2.62 (d,  $J = 3.2$  Hz, 1H), 2.35 (s, 3H);  $^{13}C$  NMR (100 MHz,  $CDCl_3$ )  $\delta$  144.6, 142.9, 142.1, 140.5, 139.9, 134.4, 134.0, 131.4, 131.0, 129.7, 128.7, 128.4, 128.2, 127.9, 127.5(1), 127.4(9), 127.2, 126.9(2), 126.9(0), 126.4, 126.0, 122.6, 82.2, 73.0, 71.1, 52.4, 31.1, 21.5; IR (neat): 3444(bs), 2955, 2922, 2234(s), 1455, 1364, 1167, 1018, 757, 698, 546; HRESIMS Calcd for  $[C_{36}H_{31}NNaO_3S]^+$  ( $M + Na^+$ ) 580.1917, found 580.1917.

***N*-(4-chloro-2-(hydroxy(phenyl)methyl)phenethyl)-4-methyl-*N*-(phenylethynyl)benzenesulfonamide (1u)**

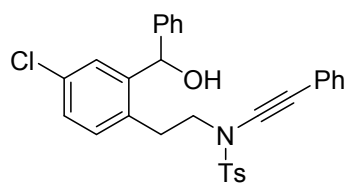

**1u**

Pale yellow oil.  $^1H$  NMR (400 MHz,  $CDCl_3$ )  $\delta$  7.68 (d,  $J = 8.0$  Hz, 2H), 7.49 (d,  $J = 2.0$  Hz, 1H), 7.38 – 7.32 (m, 2H), 7.31 – 7.20 (m, 10H), 7.14 (dd,  $J = 8.0$  Hz,  $J = 2.0$  Hz, 1H), 7.07 (d,  $J = 8.4$  Hz, 1H), 5.97 (d,  $J = 2.4$  Hz, 1H), 3.49 (ddd,  $J = 15.2$  Hz,  $J = 9.2$  Hz,  $J = 6.4$  Hz, 1H), 3.39 (ddd,  $J = 14.8$  Hz,  $J = 8.8$  Hz,  $J = 6.4$  Hz, 1H), 3.05 – 2.94 (m, 1H),

2.94 – 2.83 (m, 1H), 2.71 (d,  $J = 2.8$  Hz, 1H), 2.41 (s, 3H);  $^{13}\text{C}$  NMR (100 MHz,  $\text{CDCl}_3$ )  $\delta$  144.7, 143.5, 142.3, 134.3, 133.3, 133.0, 131.8, 131.5, 129.7, 128.6, 128.3, 128.0, 127.8, 127.4, 127.3, 126.9, 122.5, 82.0, 72.5, 71.2, 52.1, 30.7, 21.5; IR (neat): 3438(bs), 2955, 2923, 2234(s), 1460, 1364, 1167, 1090, 756, 669; HRESIMS Calcd for  $[\text{C}_{30}\text{H}_{26}\text{ClNNaO}_3\text{S}]^+$  ( $\text{M} + \text{Na}^+$ ) 538.1214, found 538.1214.

***N*-(4-bromo-2-(hydroxy(phenyl)methyl)phenethyl)-4-methyl-*N*-(phenylethynyl)benzenesulfonamide (1v)**

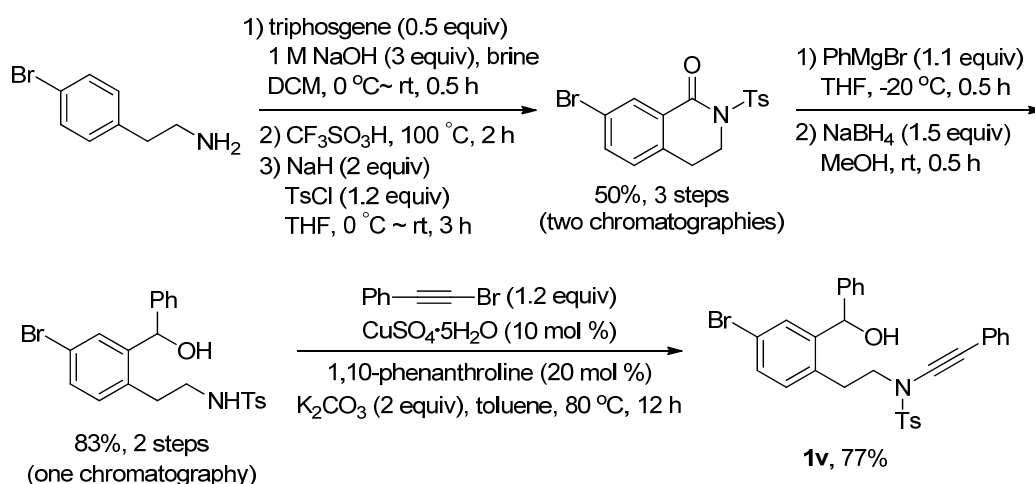

**Supplementary Figure 133.** Procedures for the preparation of ynamide **1v**.

Compound **1v** was prepared according to the above known procedures.<sup>1,3,6</sup> Yellow oil.  $^1\text{H}$  NMR (400 MHz,  $\text{CDCl}_3$ )  $\delta$  7.67 (d,  $J = 8.4$  Hz, 2H), 7.64 (d,  $J = 2.0$  Hz, 1H), 7.36 – 7.32 (m, 2H), 7.31 – 7.26 (m, 5H), 7.26 – 7.19 (m, 6H), 7.01 (d,  $J = 8.0$  Hz, 1H), 5.96 (d,  $J = 3.2$  Hz, 1H), 3.48 (ddd,  $J = 15.2$  Hz,  $J = 8.8$  Hz,  $J = 6.4$  Hz, 1H), 3.39 (ddd,  $J = 14.8$  Hz,  $J = 8.4$  Hz,  $J = 6.0$  Hz, 1H), 3.01 – 2.92 (m, 1H), 2.91 – 2.81 (m, 1H), 2.73 (d,  $J = 3.2$  Hz, 1H), 2.40 (s, 3H);  $^{13}\text{C}$  NMR (100 MHz,  $\text{CDCl}_3$ )  $\delta$  144.7, 143.8, 142.2, 134.3, 133.8, 132.1, 131.4, 130.7, 130.2, 129.7, 128.5, 128.3, 128.0, 127.8, 127.4, 126.9, 122.4, 121.1, 82.0, 72.5, 71.2, 52.0, 30.8, 21.6; IR (neat): 3447(bs), 3030, 2925, 2235(s), 1492, 1453, 1362, 1167, 755, 546; HRESIMS Calcd for  $[\text{C}_{30}\text{H}_{26}\text{BrNNaO}_3\text{S}]^+$  ( $\text{M} + \text{Na}^+$ ) 582.0709, found 582.0713.

***N*-(2-(hydroxy(phenyl)methyl)-5-methylphenethyl)-4-methyl-*N*-(phenylethynyl)benzenesulfonamide (1w)**

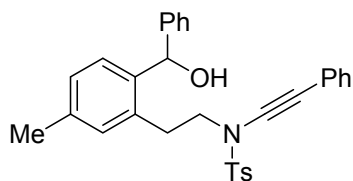

**1w**

Pale yellow oil.  $^1\text{H}$  NMR (400 MHz,  $\text{CDCl}_3$ )  $\delta$  7.72 (d,  $J = 8.4$  Hz, 2H), 7.39 – 7.34 (m, 2H), 7.30 – 7.19 (m, 11H), 7.04 (d,  $J = 8.0$  Hz, 1H), 6.98 (s, 1H), 6.00 (d,  $J = 3.2$  Hz, 1H), 3.55 (ddd,  $J = 16.0$  Hz,  $J = 10.0$  Hz,  $J = 6.0$  Hz, 1H), 3.45 (ddd,  $J = 16.0$  Hz,  $J = 10.0$  Hz,  $J = 6.4$  Hz, 1H), 3.03 (ddd,  $J = 15.6$  Hz,  $J = 9.6$  Hz,  $J = 6.0$  Hz, 1H), 2.95 (ddd,  $J = 16.4$  Hz,  $J = 10.0$  Hz,  $J = 6.4$  Hz, 1H), 2.46 (d,  $J = 3.6$  Hz, 1H), 2.40 (s, 3H), 2.28 (s, 3H);  $^{13}\text{C}$  NMR (100 MHz,  $\text{CDCl}_3$ )  $\delta$  144.5, 143.3, 138.8, 137.5, 134.8, 134.5, 131.5, 131.2, 129.7, 128.3, 128.2, 127.9, 127.5(3), 127.5(1), 127.3, 126.8, 122.7, 82.2, 72.8, 71.0, 52.5, 31.4, 21.5, 20.9; IR (neat): 3435(bs), 2954, 2924, 2235(s), 1597, 1453, 1364, 1168, 1089, 756, 692, 546; HRESIMS Calcd for  $[\text{C}_{31}\text{H}_{29}\text{NNaO}_3\text{S}]^+$  ( $\text{M} + \text{Na}^+$ ) 518.1760, found 518.1761.

***N*-(2-(hydroxy(phenyl)methyl)-5-methoxyphenethyl)-4-methyl-*N*-(phenylethynyl)benzenesulfonamide (1x)**

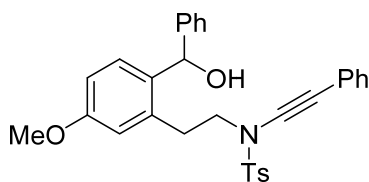

**1x**

Pale yellow oil.  $^1\text{H}$  NMR (400 MHz,  $\text{CDCl}_3$ )  $\delta$  7.71 (d,  $J = 8.0$  Hz, 2H), 7.39 – 7.32 (m, 2H), 7.31 – 7.17 (m, 11H), 6.78 – 6.68 (m, 2H), 5.98 (s, 1H), 3.72 (s, 3H), 3.57 (ddd,  $J = 15.6$  Hz,  $J = 9.6$  Hz,  $J = 6.4$  Hz, 1H), 3.49 (ddd,  $J = 15.6$  Hz,  $J = 8.8$  Hz,  $J = 6.4$  Hz, 1H), 3.10 – 2.92 (m, 2H), 2.55 (s, 1H), 2.40 (s, 3H);  $^{13}\text{C}$  NMR (100 MHz,  $\text{CDCl}_3$ )  $\delta$  158.9, 144.6, 143.4, 136.6, 134.4, 134.0, 131.4, 129.7, 129.0, 128.3, 128.2, 127.8, 127.5, 127.2, 126.6, 122.6, 115.9, 112.4, 82.2, 72.5, 71.1, 55.1, 52.4, 31.5, 21.5; IR (neat): 3449(bs), 3065, 2928, 2235(s), 1578, 1363, 1170, 1090, 756, 692, 572; HRESIMS Calcd for  $[\text{C}_{31}\text{H}_{29}\text{NNaO}_4\text{S}]^+$  ( $\text{M} + \text{Na}^+$ ) 534.1710, found 534.1710.

***N*-(5-chloro-2-(hydroxy(phenyl)methyl)phenethyl)-4-methyl-*N*-(phenylethynyl)benzenesulfonamide (1y)**

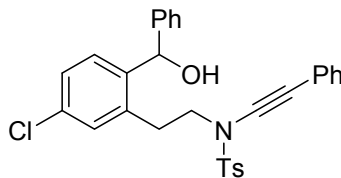

**1y**

Pale yellow oil.  $^1\text{H}$  NMR (400 MHz,  $\text{CDCl}_3$ )  $\delta$  7.66 (d,  $J = 8.0$  Hz, 2H), 7.39 – 7.30 (m, 3H), 7.28 – 7.15 (m, 10H), 7.12 (dd,  $J = 8.4$  Hz,  $J = 2.0$  Hz, 1H), 7.08 (d,  $J = 2.0$  Hz, 1H), 5.92 (d,  $J = 3.6$  Hz, 1H), 3.48 (ddd,  $J = 15.6$  Hz,  $J = 9.2$  Hz,  $J = 6.4$  Hz, 1H), 3.38 (ddd,  $J = 15.2$  Hz,  $J = 8.8$  Hz,  $J = 6.4$  Hz, 1H), 3.17 (d,  $J = 4.0$  Hz, 1H), 3.01 – 2.82 (m, 2H), 2.36 (s, 3H);  $^{13}\text{C}$  NMR (100 MHz,  $\text{CDCl}_3$ )  $\delta$  144.6, 142.5, 140.2, 136.7, 134.0, 133.1, 131.4, 130.0, 129.6, 128.8, 128.3, 128.1, 127.9, 127.4, 127.3, 126.9, 126.7, 122.3, 81.8, 72.2, 71.2, 51.8, 30.9, 21.4; IR (neat): 3452(bs), 2954, 2923, 2234(s), 1455, 1364, 1168, 1089, 755, 546; HRESIMS Calcd for  $[\text{C}_{30}\text{H}_{26}\text{ClNNaO}_3\text{S}]^+$  ( $\text{M} + \text{Na}^+$ ) 538.1214, found 538.1211.

***N*-(2-(hydroxy(phenyl)methyl)-4,5-dimethylphenethyl)-4-methyl-*N*-(phenylethynyl)benzenesulfonamide (1z)**

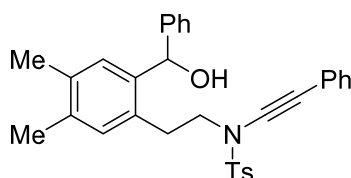

**1z**

Pale yellow oil.  $^1\text{H}$  NMR (400 MHz,  $\text{CDCl}_3$ )  $\delta$  7.71 (d,  $J = 8.0$  Hz, 2H), 7.38 – 7.33 (m, 2H), 7.30 – 7.18 (m, 10H), 7.17 (s, 1H), 6.91 (s, 1H), 5.96 (d,  $J = 1.6$  Hz, 1H), 3.56 – 3.35 (m, 2H), 3.04 – 2.86 (m, 2H), 2.55 (d,  $J = 2.8$  Hz, 1H), 2.38 (s, 3H), 2.18 (s, 3H), 2.17 (s, 3H);  $^{13}\text{C}$  NMR (100 MHz,  $\text{CDCl}_3$ )  $\delta$  144.5, 143.4, 139.0, 136.0, 135.3, 134.4, 132.1, 131.8, 131.4, 129.6, 128.6, 128.3, 128.2, 127.8, 127.5, 127.2, 126.7, 122.7, 82.2, 72.6, 71.0, 52.6, 30.9, 21.5, 19.3, 19.2; IR (neat): 3534(bs), 3060, 2922, 2235(s), 1597, 1450, 1363, 1168, 756, 738, 547; HRESIMS Calcd for  $[\text{C}_{32}\text{H}_{31}\text{NNaO}_3\text{S}]^+$  ( $\text{M} + \text{Na}^+$ ) 532.1917, found 532.1915.

***N*-(2-(6-(hydroxy(phenyl)methyl)benzo[*d*][1,3]dioxol-5-yl)ethyl)-4-methyl-*N*-(phenylethynyl)benzenesulfonamide (1aa)**

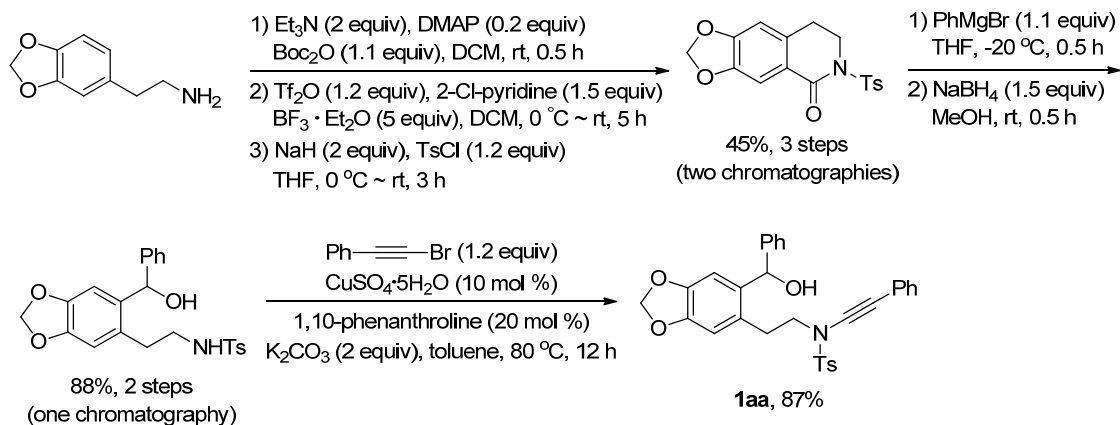

**Supplementary Figure 134.** Procedures for the preparation of ynamide **1aa**.

Compound **1aa** was prepared according to the above known procedures.<sup>1,3,7</sup> Yellow solid. (mp 170-171 °C). <sup>1</sup>H NMR (400 MHz, CDCl<sub>3</sub>) δ 7.71 (d, *J* = 8.4 Hz, 2H), 7.39 – 7.32 (m, 2H), 7.31 – 7.17 (m, 10H), 6.87 (s, 1H), 6.61 (s, 1H), 5.96 (s, 1H), 5.82 (dd, *J* = 4.4 Hz, *J* = 1.2 Hz, 2H), 3.52 (ddd, *J* = 15.6 Hz, *J* = 9.6 Hz, *J* = 6.4 Hz, 1H), 3.43 (ddd, *J* = 15.2 Hz, *J* = 8.8 Hz, *J* = 6.0 Hz, 1H), 3.00 (ddd, *J* = 14.8 Hz, *J* = 9.2 Hz, *J* = 6.4 Hz, 1H), 2.90 (ddd, *J* = 15.6 Hz, *J* = 9.2 Hz, *J* = 6.4 Hz, 1H), 2.73 (s, 1H), 2.38 (s, 3H); <sup>13</sup>C NMR (100 MHz, CDCl<sub>3</sub>) δ 146.8, 146.6, 144.6, 143.2, 135.5, 134.4, 131.4, 129.6, 128.3, 128.2, 127.8, 127.4, 127.3, 126.6, 122.5, 110.0, 107.8, 100.9, 82.1, 72.1, 71.1, 52.6, 31.3, 21.5; IR (neat): 3445(bs), 2923, 2234(s), 1503, 1484, 1363, 1168, 1040, 676, 576; HRESIMS Calcd for [C<sub>31</sub>H<sub>27</sub>NNaO<sub>5</sub>S]<sup>+</sup> (M + Na<sup>+</sup>) 548.1502, found 548.1506.

***N*-(2-(3-(hydroxy(phenyl)methyl)naphthalen-2-yl)ethyl)-4-methyl-*N*-(phenylethynyl)benzenesulfonamide (1ab)**

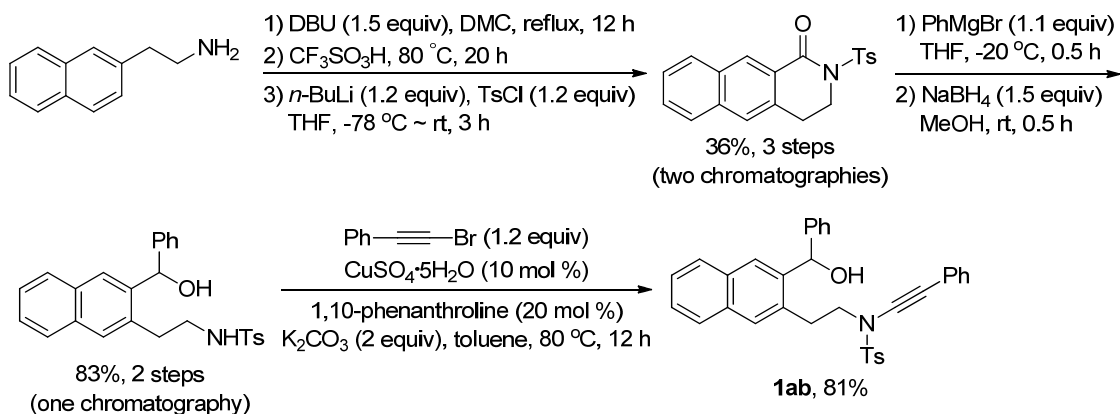

**Supplementary Figure 135.** Procedures for the preparation of ynamide **1ab**.

Compound **1ab** was prepared according to the above known procedures.<sup>1-3,8</sup> Pale yellow oil. <sup>1</sup>H NMR (400 MHz, CDCl<sub>3</sub>) δ 7.74 (d, *J* = 8.4 Hz, 2H), 7.49 – 7.44 (m, 1H), 7.43 – 6.98 (m, 17H), 6.08 (d, *J* = 2.0 Hz, 1H), 3.57 (ddd, *J* = 15.6 Hz, *J* = 9.6 Hz, *J* = 6.0 Hz, 1H), 3.47 (ddd, *J* = 15.6 Hz, *J* = 9.2 Hz, *J* = 6.0 Hz, 1H), 3.09 (ddd, *J* = 15.2 Hz, *J* = 9.6 Hz, *J* = 6.0 Hz, 1H), 3.00 (ddd, *J* = 16.0 Hz, *J* = 10.0 Hz, *J* = 6.0 Hz, 1H), 2.43 (s, 3H), 2.36 (d, *J* = 3.6 Hz, 1H); <sup>13</sup>C NMR (100 MHz, CDCl<sub>3</sub>) δ 144.6, 143.1, 141.7, 135.1, 134.6, 131.5, 130.6, 129.8, 128.5, 128.3, 128.0, 127.9, 127.6, 127.5(4), 127.5(3), 127.2, 126.9, 122.8, 82.3, 73.0, 71.1, 52.6, 31.5, 21.6; IR (neat): 3440(bs), 2917, 2848, 2234(s), 1493, 1363, 1168, 1089, 692, 597, 546; HRESIMS Calcd for [C<sub>34</sub>H<sub>29</sub>NNaO<sub>3</sub>S]<sup>+</sup> (M + Na<sup>+</sup>) 554.1760, found 554.1761.

Compounds **1ac-1ad**, **1af** and **1ah** were prepared according to the following procedures.<sup>1-</sup>

3

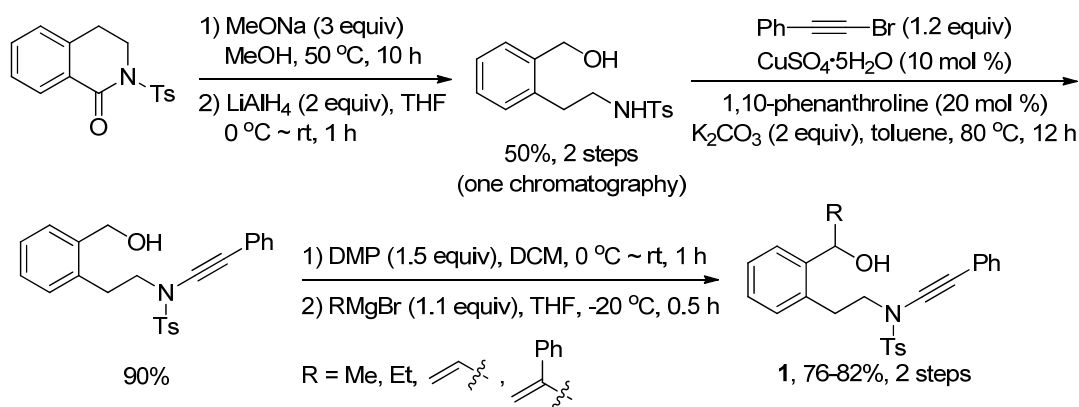



**Supplementary Figure 136.** Procedures for the preparation of ynamides **1ac-1ad**, **1af** and **1ah**.

***N*-(2-(1-hydroxyethyl)phenethyl)-4-methyl-*N*-(phenylethynyl)benzenesulfonamide**  
**(1ac)**

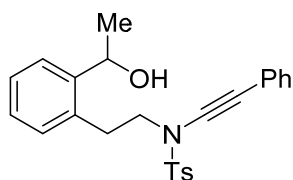

**1ac**

Pale yellow oil.  $^1\text{H}$  NMR (500 MHz,  $\text{CDCl}_3$ )  $\delta$  7.75 (d,  $J = 8.5$  Hz, 2H), 7.50 (dd,  $J = 8.0$  Hz,  $J = 1.0$  Hz, 1H), 7.40 – 7.34 (m, 2H), 7.30 – 7.22 (m, 6H), 7.19 – 7.11 (m, 2H), 5.13 (q,  $J = 6.5$  Hz, 1H), 3.69 – 3.56 (m, 2H), 3.11 – 2.98 (m, 2H), 2.40 (s, 3H), 2.37 (s, 1H), 1.45 (d,  $J = 6.0$  Hz, 3H);  $^{13}\text{C}$  NMR (125 MHz,  $\text{CDCl}_3$ )  $\delta$  144.6, 143.8, 134.4, 133.7, 131.2, 130.0, 129.7, 128.2, 127.8, 127.5, 127.4, 127.3, 125.5, 122.5, 82.1, 71.1, 66.0, 52.7, 31.0, 24.6, 21.5; IR (neat): 3443(bs), 2971, 2926, 2235(s), 1597, 1443, 1364, 1168, 1089, 756, 546; HRESIMS Calcd for  $[\text{C}_{25}\text{H}_{25}\text{NNaO}_3\text{S}]^+$  ( $\text{M} + \text{Na}^+$ ) 442.1447, found 442.1447.

***N*-(2-(1-hydroxypropyl)phenethyl)-4-methyl-*N*-(phenylethynyl)benzenesulfonamide**  
**(1ad)**

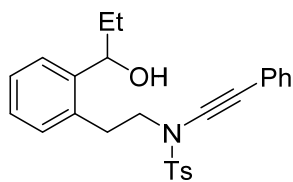

**1ad**

Pale yellow oil.  $^1\text{H}$  NMR (400 MHz,  $\text{CDCl}_3$ )  $\delta$  7.77 (d,  $J = 8.4$  Hz, 2H), 7.47 (dd,  $J = 8.0$  Hz,  $J = 1.2$  Hz, 1H), 7.41 – 7.35 (m, 2H), 7.34 – 7.28 (m, 5H), 7.28 – 7.24 (m, 1H), 7.22 – 7.14 (m, 2H), 4.87 (dd,  $J = 7.6$  Hz,  $J = 5.6$  Hz, 1H), 3.65 (t,  $J = 7.6$  Hz, 2H), 3.18 – 2.98 (m, 2H), 2.43 (s, 3H), 2.01 (s, 1H), 1.88 – 1.68 (m, 2H), 0.94 (t,  $J = 7.6$  Hz, 3H);  $^{13}\text{C}$  NMR (100 MHz,  $\text{CDCl}_3$ )  $\delta$  144.7, 142.9, 134.6, 134.3, 131.4, 130.2, 129.8, 128.3, 127.9, 127.6, 127.5, 127.4, 126.2, 122.7, 82.2, 71.7, 71.2, 52.9, 31.5, 31.3, 21.6, 10.5; IR (neat):

3448(bs), 2918, 2232(s), 1494, 1454, 1362, 1166, 1089, 753, 587, 545; HRESIMS Calcd for  $[\text{C}_{26}\text{H}_{27}\text{NNaO}_3\text{S}]^+$  ( $\text{M} + \text{Na}^+$ ) 456.1604, found 456.1601.

Compounds **1ae** and **1an** were prepared according to the following procedures.<sup>1-3</sup>

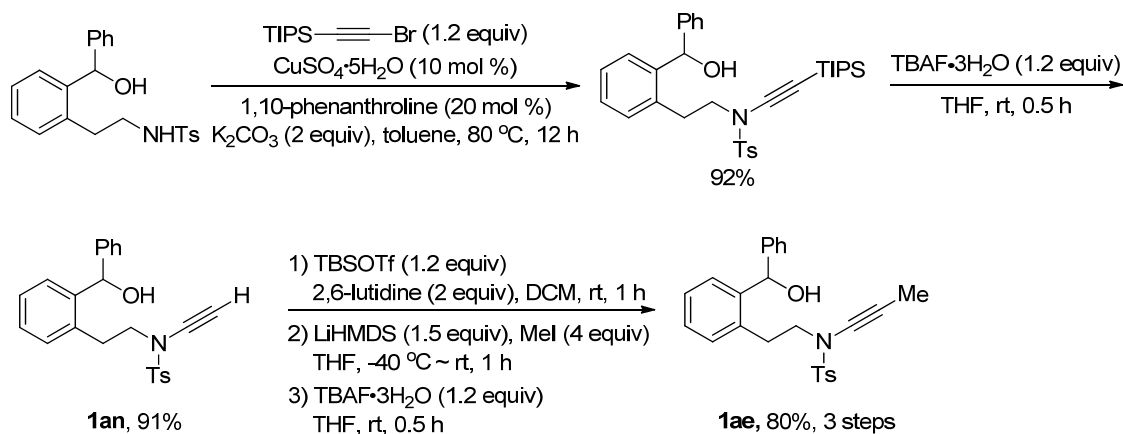

**Supplementary Figure 137.** Procedures for the preparation of ynamides **1ae** and **1an**.

***N*-(2-(hydroxy(phenyl)methyl)phenethyl)-4-methyl-*N*-(prop-1-yn-1-yl)benzenesulfonamide (**1ae**)**

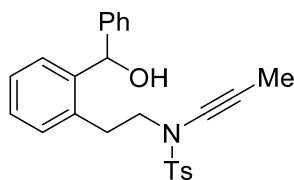

**1ae**

Colorless oil.  $^1\text{H}$  NMR (400 MHz,  $\text{CDCl}_3$ )  $\delta$  7.66 (d,  $J = 8.4$  Hz, 2H), 7.44 – 7.40 (m, 1H), 7.30 – 7.18 (m, 9H), 7.16 – 7.12 (m, 1H), 6.01 (d,  $J = 3.2$  Hz, 1H), 3.41 (ddd,  $J = 15.6$  Hz,  $J = 9.6$  Hz,  $J = 5.6$  Hz, 1H), 3.31 (ddd,  $J = 16.0$  Hz,  $J = 9.6$  Hz,  $J = 6.4$  Hz, 1H), 3.03 – 2.84 (m, 2H), 2.62 (d,  $J = 3.2$  Hz, 1H), 2.40 (s, 3H), 1.90 (s, 3H);  $^{13}\text{C}$  NMR (100 MHz,  $\text{CDCl}_3$ )  $\delta$  144.2, 143.1, 141.6, 135.1, 134.5, 130.3, 129.6, 128.3, 127.8, 127.4, 127.0, 126.8, 72.7, 71.8, 66.0, 52.3, 31.2, 21.5, 3.3; IR (neat): 3533(bs), 3029, 2922, 2260(s), 1452, 1359, 1166, 1018, 760, 700, 592; HRESIMS Calcd for  $[\text{C}_{25}\text{H}_{25}\text{NNaO}_3\text{S}]^+$  ( $\text{M} + \text{Na}^+$ ) 442.1447, found 442.1448.

***N*-(2-(1-hydroxy-2-phenylallyl)phenethyl)-4-methyl-*N*-(phenylethynyl)benzenesulfonamide (1af)**

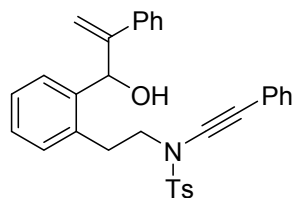

**1af**

Pale yellow oil.  $^1\text{H}$  NMR (400 MHz,  $\text{CDCl}_3$ )  $\delta$  7.75 (d,  $J = 8.0$  Hz, 2H), 7.48 – 7.42 (m, 1H), 7.36 – 7.32 (m, 2H), 7.30 – 7.23 (m, 7H), 7.20 – 7.12 (m, 6H), 5.93 (s, 1H), 5.47 (s, 1H), 5.36 (s, 1H), 3.75 – 3.65 (m, 1H), 3.63 – 3.52 (m, 1H), 3.17 – 3.04 (m, 2H), 2.38 (s, 1H), 2.39 (s, 3H);  $^{13}\text{C}$  NMR (100 MHz,  $\text{CDCl}_3$ )  $\delta$  150.3, 144.6, 139.5(9), 139.5(6), 135.5, 134.5, 131.4, 130.3, 129.7, 128.3, 128.2, 128.1, 127.8, 127.6(2), 127.5(6), 127.5(3), 127.2, 126.7, 122.6, 114.5, 82.2, 71.7, 71.1, 52.7, 31.5, 21.5; IR (neat): 3444(bs), 2955, 2923, 2233(s), 1462, 1364, 1170, 1085, 761, 554, ; HRESIMS Calcd for  $[\text{C}_{32}\text{H}_{29}\text{NNaO}_3\text{S}]^+$  ( $\text{M} + \text{Na}^+$ ) 530.1760, found 530.1761.

**Methyl-2-(hydroxy(2-(2-((4-methyl-*N*-(phenylethynyl)phenyl)sulfonamido)ethyl)phenyl)methyl)acrylate (1ag)**

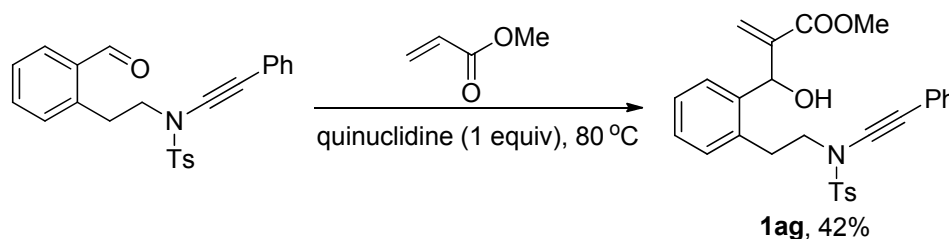

**Supplementary Figure 138. Synthesis of ynamide 1ag.**

Compound **1ag** was prepared according to the above known procedure.<sup>9</sup> Pale yellow oil.  $^1\text{H}$  NMR (400 MHz,  $\text{CDCl}_3$ )  $\delta$  7.78 (d,  $J = 8.4$  Hz, 2H), 7.38 – 7.35 (m, 3H), 7.33 – 7.28 (m, 5H), 7.25 – 7.19 (m, 3H), 6.39 – 6.36 (m, 1H), 5.86 (d,  $J = 3.6$  Hz, 1H), 5.84 – 5.81 (m, 1H), 3.77 – 3.71 (m, 1H), 3.67 (s, 3H), 3.65 – 3.61 (m, 1H), 3.22 (ddd,  $J = 15.2$  Hz,  $J = 9.2$  Hz,  $J = 5.6$  Hz, 1H), 3.09 (ddd,  $J = 16.0$  Hz,  $J = 9.2$  Hz,  $J = 6.4$  Hz, 1H), 2.88 (d,  $J = 4.0$  Hz, 1H), 2.43 (s, 3H);  $^{13}\text{C}$  NMR (100 MHz,  $\text{CDCl}_3$ )  $\delta$  166.6, 144.7, 142.0, 139.1, 135.5, 134.6, 131.4, 130.6, 129.8, 128.3, 128.2, 127.8, 127.6, 127.4, 127.2, 126.0, 122.7,

82.2, 71.1, 68.9, 52.7, 51.9, 31.6, 21.6; IR (neat): 3439(bs), 2923, 2235(s), 1716(s), 1492, 1441, 1364, 1168, 756, 692, 546; HRESIMS Calcd for  $[C_{28}H_{27}NNaO_5S]^+$  ( $M + Na^+$ ) 512.1502, found 512.1507.

***N*-(2-(1-hydroxyallyl)phenethyl)-4-methyl-*N*-(phenylethynyl)benzenesulfonamide (1ah)**

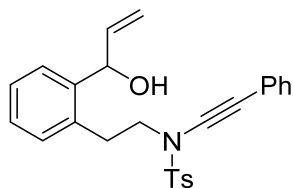

**1ah**

Pale yellow oil.  $^1H$  NMR (500 MHz,  $CDCl_3$ )  $\delta$  7.78 (d,  $J = 8.5$  Hz, 2H), 7.44 (dd,  $J = 7.5$  Hz,  $J = 1.5$  Hz, 1H), 7.40 – 7.35 (m, 2H), 7.34 – 7.28 (m, 5H), 7.27 – 7.17 (m, 3H), 6.04 (ddd,  $J = 17.5$  Hz,  $J = 10.5$  Hz,  $J = 5.5$  Hz, 1H), 5.48 – 5.42 (m, 1H), 5.36 – 5.28 (m, 1H), 5.22 – 5.15 (m, 1H), 3.69 – 3.59 (m, 2H), 3.17 – 3.05 (m, 2H), 2.43 (s, 3H), 2.15 (d,  $J = 3.5$  Hz, 1H);  $^{13}C$  NMR (100 MHz,  $CDCl_3$ )  $\delta$  144.6, 140.7, 139.8, 134.9, 134.5, 131.4, 130.4, 129.8, 128.3, 128.0, 127.9, 127.6, 127.4, 127.1, 122.6, 115.4, 82.2, 71.6, 71.1, 52.7, 31.4, 21.6; IR (neat): 3414(bs), 2922, 2853, 2234(s), 1491, 1449, 1364, 1167, 1088, 754, 606; HRESIMS Calcd for  $[C_{26}H_{25}NNaO_3S]^+$  ( $M + Na^+$ ) 454.1447, found 454.1453.

***N*-(3-(2-(hydroxy(phenyl)methyl)phenyl)propyl)-4-methyl-*N*-(phenylethynyl)benzenesulfonamide (1ai)**

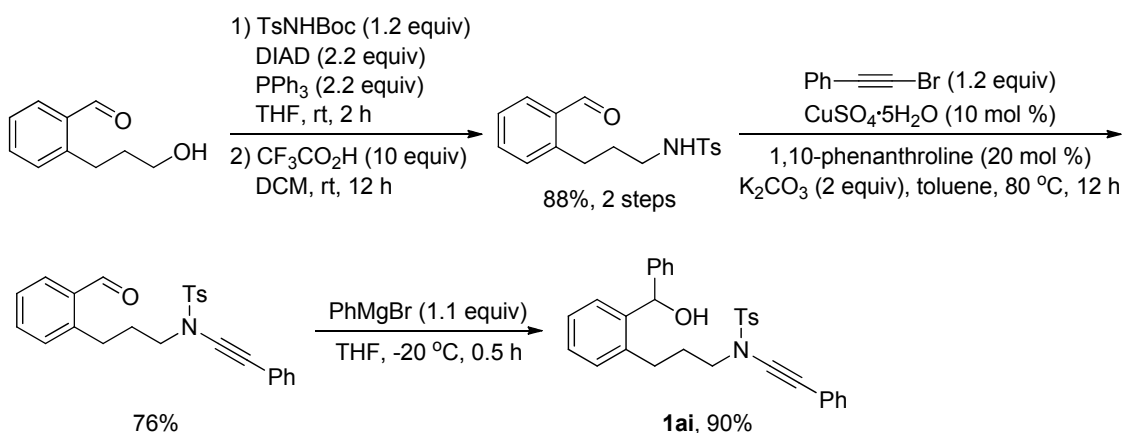

**Supplementary Figure 139.** Procedures for the preparation of ynamide **1ai**.

Compound **1ai** was prepared according to the above known procedures.<sup>1</sup> Pale yellow oil. <sup>1</sup>H NMR (500 MHz, CDCl<sub>3</sub>) δ 7.79 (d, *J* = 8.0 Hz, 2H), 7.45 – 7.40 (m, 1H), 7.35 – 7.31 (m, 2H), 7.31 – 7.22 (m, 9H), 7.20 – 7.17 (m, 3H), 7.14 – 7.11 (m, 1H), 6.01 (s, 1H), 3.34 (t, *J* = 6.5 Hz, 2H), 2.74 (ddd, *J* = 15.5 Hz, *J* = 10.0 Hz, *J* = 6.0 Hz, 1H), 2.61 (ddd, *J* = 15.5 Hz, *J* = 10.0 Hz, *J* = 5.5 Hz, 1H), 2.54 (s, 1H), 2.39 (s, 3H), 1.96 – 1.79 (m, 2H); <sup>13</sup>C NMR (125 MHz, CDCl<sub>3</sub>) δ 144.6, 143.3, 141.2, 138.3, 134.2, 131.3, 129.7, 129.3, 128.3, 128.2, 127.7, 127.6, 127.5, 127.3, 127.1, 126.8, 126.4, 122.6, 82.1, 72.5, 70.9, 51.0, 29.1, 28.8, 21.5; IR (neat): 3539(bs), 3061, 2925, 2236(s), 1595, 1450, 1364, 1168, 756, 676, 547; HRESIMS Calcd for [C<sub>31</sub>H<sub>29</sub>NNaO<sub>3</sub>S]<sup>+</sup> (*M* + Na<sup>+</sup>) 518.1760, found 518.1763.

***N*-(2-(3-(1-hydroxyallyl)-1-tosyl-1*H*-indol-2-yl)ethyl)-4-methyl-*N*-(phenylethynyl)benzenesulfonamide (**1aj**)**

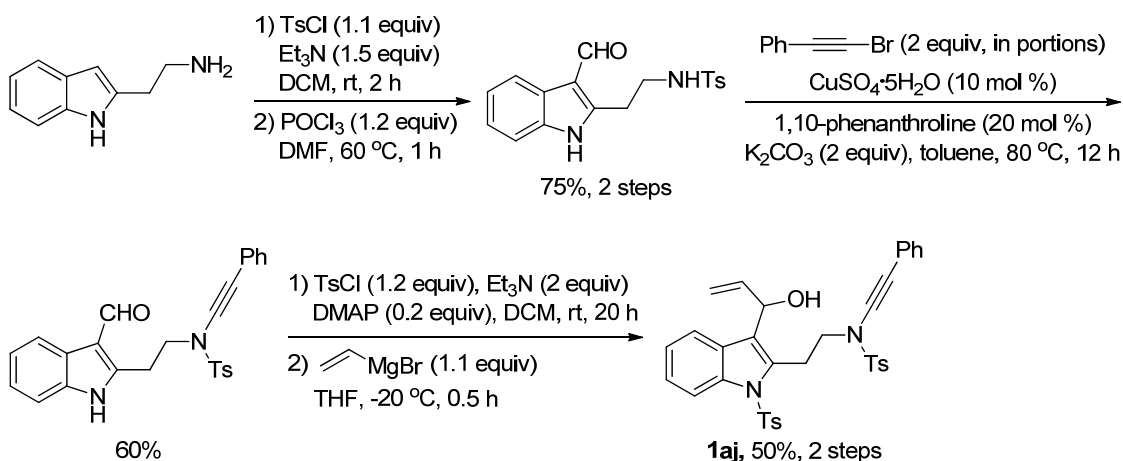

**Supplementary Figure 140.** Procedures for the preparation of ynamide **1aj**.

Compound **1aj** was prepared according to the above known procedures.<sup>1,10</sup> Pale yellow oil. <sup>1</sup>H NMR (400 MHz, CDCl<sub>3</sub>) δ 8.14 (d, *J* = 8.4 Hz, 1H), 7.76 (d, *J* = 8.4 Hz, 2H), 7.74 – 7.69 (m, 1H), 7.55 (d, *J* = 8.4 Hz, 2H), 7.28 – 7.16 (m, 9H), 7.12 (d, *J* = 8.0 Hz, 2H), 6.12 (ddd, *J* = 17.2 Hz, *J* = 10.4 Hz, *J* = 4.8 Hz, 1H), 5.59 (d, *J* = 2.8 Hz, 1H), 5.29 – 5.21 (m, 1H), 5.16 – 5.11 (m, 1H), 4.03 – 3.93 (m, 1H), 3.88 – 3.79 (m, 1H), 3.48 (t, *J* = 6.4 Hz, 2H), 2.45 (s, 1H), 2.40 (s, 3H), 2.31 (s, 3H); <sup>13</sup>C NMR (100 MHz, CDCl<sub>3</sub>) δ 144.9, 144.7, 138.5, 137.2, 135.6, 134.6, 132.6, 131.4, 129.8, 129.7, 128.4, 128.2, 127.8, 127.5, 126.2, 124.7, 123.5, 122.4, 121.3, 115.4, 115.1, 82.0, 70.9, 68.0, 52.3, 26.5, 21.6, 21.5;

IR (neat): 3446(bs), 2923, 2850, 2235(s), 1452, 1362, 1170, 1086, 676, 574; HRESIMS Calcd for  $[C_{35}H_{32}N_2NaO_5S_2]^+$  ( $M + Na^+$ ) 647.1645, found 647.1652.

***tert*-butyl-3-(1-hydroxyallyl)-2-(2-((4-methyl-*N*-(phenylethynyl)phenyl)sulfonamido)ethyl)-1*H*-indole-1-carboxylate (**1ak**)**

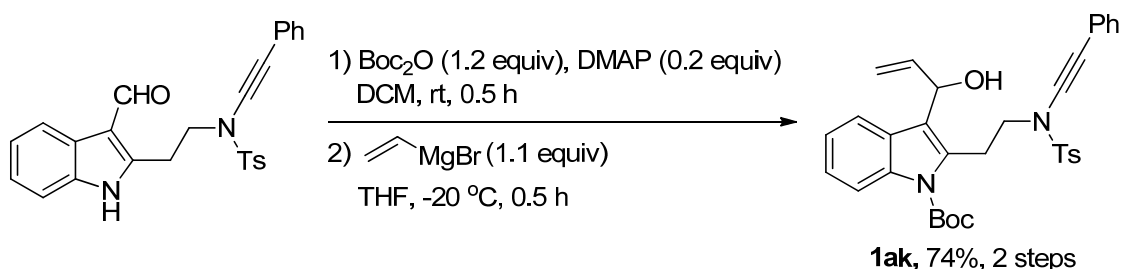

**Supplementary Figure 141.** Procedures for the preparation of ynamide **1ak**.

Compound **1ak** was prepared according to the above known procedures.<sup>1,10</sup> Pale yellow oil.  $^1H$  NMR (400 MHz,  $CDCl_3$ )  $\delta$  8.03 (d,  $J = 8.4$  Hz, 1H), 7.76 (dd,  $J = 8.0$  Hz,  $J = 0.8$  Hz, 1H), 7.64 (d,  $J = 8.4$  Hz, 2H), 7.27 – 7.23 (m, 6H), 7.22 – 7.16 (m, 1H), 7.12 (d,  $J = 8.0$  Hz, 2H), 6.16 (ddd,  $J = 17.2$  Hz,  $J = 10.4$  Hz,  $J = 4.8$  Hz, 1H), 5.62 (d,  $J = 4.4$  Hz, 1H), 5.40 – 5.33 (m, 1H), 5.19 – 5.12 (m, 1H), 4.02 – 3.92 (m, 1H), 3.85 – 3.75 (m, 1H), 3.57 – 3.43 (m, 2H), 2.36 (s, 3H), 2.22 (s, 1H), 1.69 (s, 9H);  $^{13}C$  NMR (100 MHz,  $CDCl_3$ )  $\delta$  150.5, 144.6, 138.8, 136.2, 134.5, 132.8, 131.6, 129.6, 128.2, 127.9, 127.6, 127.4, 124.1, 122.4, 122.3, 122.2, 120.8, 115.6, 114.9, 84.3, 82.0, 71.1, 68.0, 51.5, 28.2, 26.1, 21.5; IR (neat): 3439(bs), 2980, 2926, 2237(s), 1640(s), 1454, 1367, 1319, 1167, 1118, 754, 574; HRESIMS Calcd for  $[C_{33}H_{34}N_2NaO_5S]^+$  ( $M + Na^+$ ) 593.2081, found 593.2080.

***N*-(2-(2-(1-hydroxyallyl)benzo[*b*]thiophen-3-yl)ethyl)-4-methyl-*N*-(phenylethynyl)benzenesulfonamide (**1al**)**

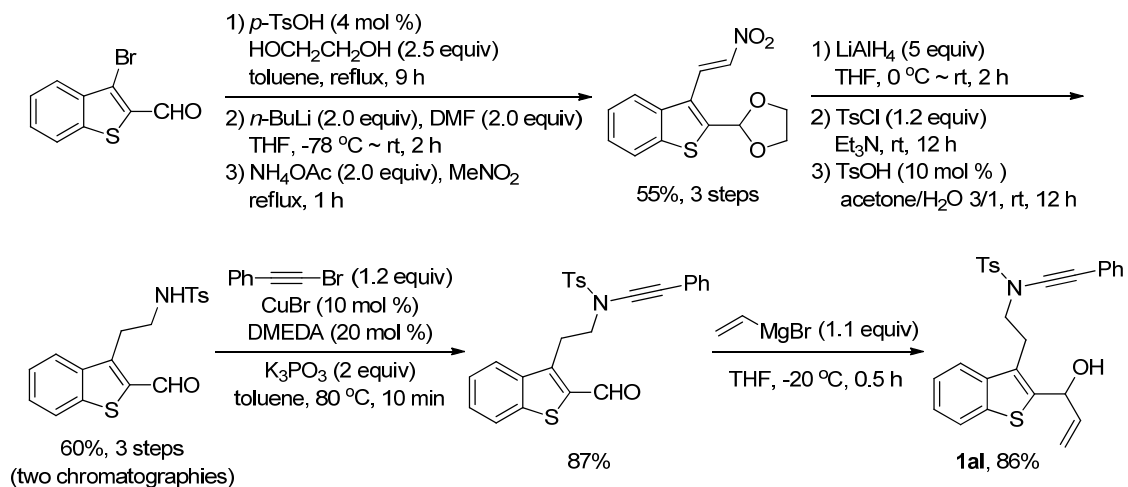

### Supplementary Figure 142. Procedures for the preparation of ynamide **1a1**.

Compound **1a1** was prepared according to the above known procedures.<sup>11-13</sup> Pale yellow oil. <sup>1</sup>H NMR (400 MHz, CDCl<sub>3</sub>) δ 7.74 (d, *J* = 7.6 Hz, 1H), 7.71 (d, *J* = 8.0 Hz, 2H), 7.66 (d, *J* = 8.0 Hz, 1H), 7.37 – 7.20 (m, 9H), 6.16 – 5.99 (m, 1H), 5.67 (d, *J* = 5.6 Hz, 1H), 5.42 (d, *J* = 17.2 Hz, 1H), 5.20 (d, *J* = 10.0 Hz, 1H), 3.74 – 3.55 (m, 2H), 3.26 (t, *J* = 7.2 Hz, 2H), 2.83 (s, 1H), 2.36 (s, 3H); <sup>13</sup>C NMR (100 MHz, CDCl<sub>3</sub>) δ 144.6, 143.8, 139.4, 138.9, 138.7, 134.3, 131.3, 129.7, 128.2, 127.9, 127.3, 127.2, 124.3, 124.1, 122.6, 122.4, 121.1, 116.0, 82.1, 71.0, 69.5, 51.0, 25.8, 21.5; IR (neat): 3446(bs), 3057, 2918, 2235(s), 1434, 1362, 1170, 1085, 674, 547; HRESIMS Calcd for [C<sub>28</sub>H<sub>25</sub>NNaO<sub>3</sub>S<sub>2</sub>]<sup>+</sup> (M + Na<sup>+</sup>) 510.1168, found 510.1167.

### *N*-(2-(3-(hydroxy(phenyl)methyl)thiophen-2-yl)ethyl)-4-methyl-*N*-(phenylethynyl)benzenesulfonamide (**1am**)

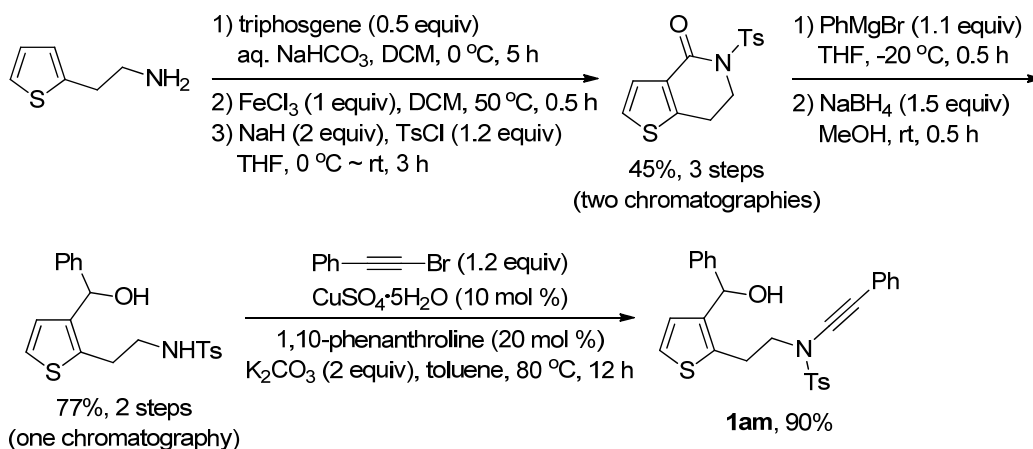

**Supplementary Figure 143.** Procedures for the preparation of ynamide **1am**.

Compound **1am** was prepared according to the above known procedures.<sup>1,3,14</sup> Pale yellow oil. <sup>1</sup>H NMR (400 MHz, CDCl<sub>3</sub>) δ 7.75 (d, *J* = 8.4 Hz, 2H), 7.38 – 7.33 (m, 4H), 7.32 – 7.26 (m, 7H), 7.26 – 7.21 (m, 1H), 7.09 (d, *J* = 5.6 Hz, 1H), 6.90 (d, *J* = 5.2 Hz, 1H), 5.95 (s, 1H), 3.70 – 3.57 (m, 2H), 3.35 – 3.17 (m, 2H), 2.46 (s, 1H), 2.43 (s, 3H); <sup>13</sup>C NMR (100 MHz, CDCl<sub>3</sub>) δ 144.7, 143.2, 141.6, 135.1, 134.5, 131.5, 129.8, 128.4, 128.3, 128.0, 127.7, 127.4, 126.2, 123.5, 122.6, 81.9, 71.3, 70.2, 52.9, 27.0, 21.6; IR (neat): 3463(bs), 2920, 2858, 2237(s), 1496, 1362, 1167, 1088, 759, 671; HRESIMS Calcd for [C<sub>28</sub>H<sub>25</sub>NNaO<sub>3</sub>S<sub>2</sub>]<sup>+</sup> (M + Na<sup>+</sup>) 510.1168, found 510.1168.

***N*-ethynyl-*N*-(2-(hydroxy(phenyl)methyl)phenethyl)-4-methylbenzenesulfonamide (1an)**

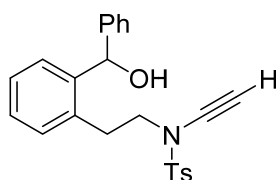

**1an**

Pale yellow oil. <sup>1</sup>H NMR (500 MHz, CDCl<sub>3</sub>) δ 7.67 (d, *J* = 8.5 Hz, 2H), 7.40 (dd, *J* = 7.5 Hz, *J* = 2.0 Hz, 1H), 7.29 – 7.18 (m, 9H), 7.14 (dd, *J* = 7.0 Hz, *J* = 2.0 Hz, 1H), 6.00 (d, *J* = 4.0 Hz, 1H), 3.44 (ddd, *J* = 16.0 Hz, *J* = 10.0 Hz, *J* = 6.0 Hz, 1H), 3.33 (ddd, *J* = 16.0 Hz, *J* = 9.5 Hz, *J* = 6.0 Hz, 1H), 3.04 – 2.96 (m, 1H), 2.92 (ddd, *J* = 16.0 Hz, *J* = 10.0 Hz, *J* = 6.0 Hz, 1H), 2.78 (s, 1H), 2.61 (d, *J* = 4.0 Hz, 1H), 2.40 (s, 3H); <sup>13</sup>C NMR (125 MHz, CDCl<sub>3</sub>) δ 144.7, 143.0, 141.6, 134.8, 134.4, 130.4, 129.7, 128.4, 127.8, 127.5, 127.4(6), 127.4(1), 127.1, 126.8, 75.9, 72.8, 59.5, 52.1, 31.1, 21.5; IR (neat): 3440(bs), 2924, 2136(s), 1597, 1451, 1361, 1168, 700, 597, 544; HRESIMS Calcd for [C<sub>24</sub>H<sub>23</sub>NNaO<sub>3</sub>S]<sup>+</sup> (M + Na<sup>+</sup>) 428.1291, found 428.1292.

***N*-(2-(2-hydroxy-2-phenylethyl)benzyl)-4-methyl-*N*-(phenylethynyl)benzenesulfonamide (1ao)**



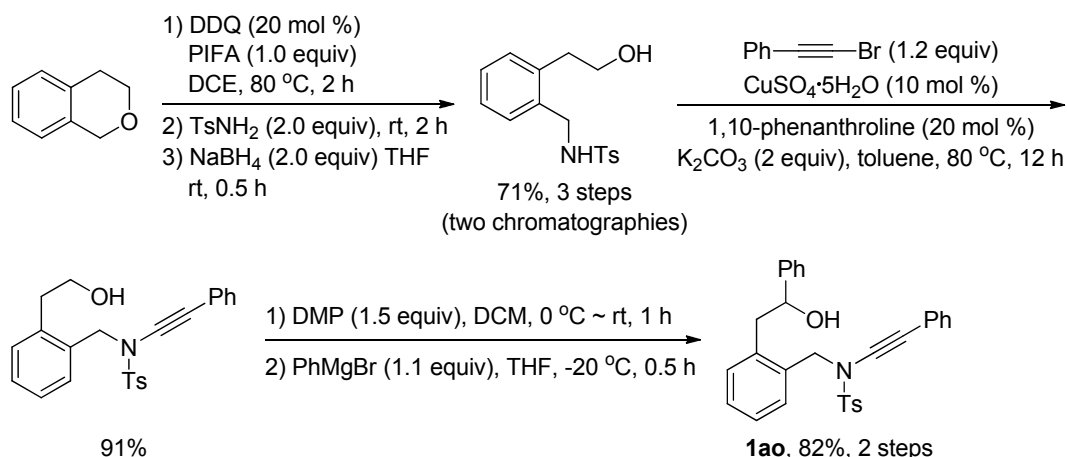

**Supplementary Figure 144.** Procedures for the preparation of ynamide **1ao**.

Compound **1ao** was prepared according to the above known procedures.<sup>1,15,16</sup> Pale yellow oil. <sup>1</sup>H NMR (400 MHz, CDCl<sub>3</sub>) δ 7.81 (d, *J* = 8.4 Hz, 2H), 7.35 – 7.11 (m, 16H), 4.92 – 4.85 (m, 1H), 4.54 (d, *J* = 13.2 Hz, 1H), 4.42 (d, *J* = 13.2 Hz, 1H), 3.19 (dd, *J* = 14.0 Hz, *J* = 8.4 Hz, 1H), 3.07 (dd, *J* = 14.0 Hz, *J* = 5.2 Hz, 1H), 2.43 (s, 3H), 2.13 (d, *J* = 3.2 Hz, 1H); <sup>13</sup>C NMR (100 MHz, CDCl<sub>3</sub>) δ 144.7, 143.7, 137.5, 133.9, 132.7, 131.0, 130.9, 130.8, 129.7, 128.6, 128.3, 128.1, 127.8, 127.6, 127.5, 126.6, 125.9, 122.6, 82.6, 75.2, 71.5, 53.0, 42.2, 21.6; IR (neat): 3444(bs), 2922, 2954, 2233(s), 1454, 1363, 1167, 1020, 690, 544, ; HRESIMS Calcd for [C<sub>30</sub>H<sub>27</sub>NNaO<sub>3</sub>S]<sup>+</sup> (M + Na<sup>+</sup>) 504.1604, found 504.1604.

***N*-(5-hydroxy-5-phenylpentyl)-4-methyl-*N*-(phenylethynyl)benzenesulfonamide (1ap)**

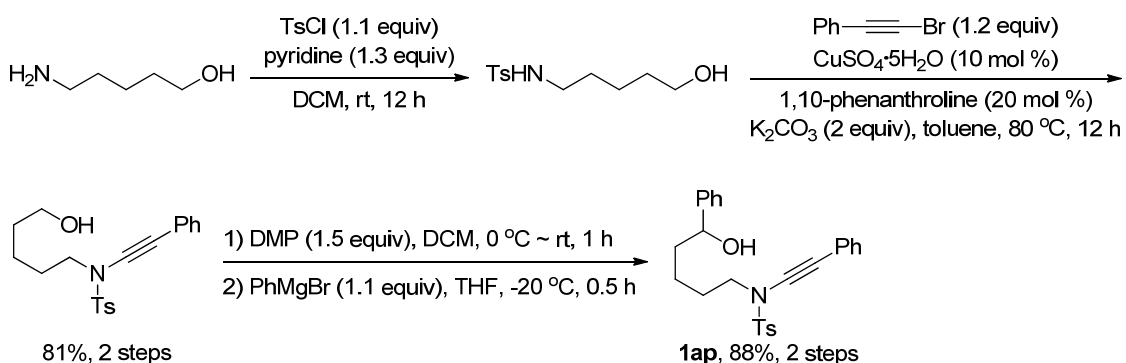

**Supplementary Figure 145.** Procedures for the preparation of ynamide **1ap**.

Compound **1ap** was prepared according to the above known procedures.<sup>1,17</sup> Pale yellow oil. <sup>1</sup>H NMR (500 MHz, CDCl<sub>3</sub>) δ 7.81 (d, *J* = 8.5 Hz, 2H), 7.35 – 7.24 (m, 12H), 4.63 (t, *J* = 6.5 Hz, 1H), 3.36 (t, *J* = 7.0 Hz, 2H), 2.43 (s, 3H), 1.97 (s, 1H), 1.84 – 1.68 (m, 4H),

1.53 – 1.44 (m, 1H), 1.40 – 1.30 (m, 1H);  $^{13}\text{C}$  NMR (125 MHz,  $\text{CDCl}_3$ )  $\delta$  144.6, 134.6, 131.3, 129.7, 128.4, 128.2, 127.7, 127.6, 127.5, 125.8, 122.9, 82.4, 74.3, 70.7, 51.4, 38.4, 27.8, 22.5, 21.6; IR (neat): 3419(bs), 2939, 2236(s), 1597, 1453, 1363, 1168, 1090, 756, 585; HRESIMS Calcd for  $[\text{C}_{26}\text{H}_{27}\text{NNaO}_3\text{S}]^+$  ( $\text{M} + \text{Na}^+$ ) 456.1604, found 456.1606.

***N*-2-(methoxy(phenyl)methyl)phenethyl-4-methyl-*N*-(phenylethynyl)benzenesulfonamide (1aq)**

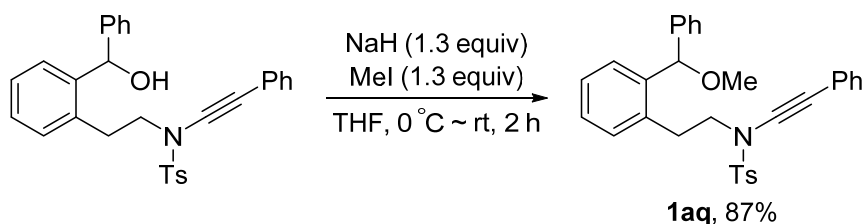

**Supplementary Figure 146. Synthesis of ynamide 1aq.**

Compound **1aq** was prepared according to the above known procedure. Yellow oil.  $^1\text{H}$  NMR (400 MHz,  $\text{CDCl}_3$ )  $\delta$  7.76 (d,  $J = 8.0$  Hz, 2H), 7.40 – 7.34 (m, 3H), 7.32 – 7.16 (m, 13H), 5.46 (s, 1H), 3.53 (ddd,  $J = 16.0$  Hz,  $J = 10.0$  Hz,  $J = 6.0$  Hz, 1H), 3.44 (ddd,  $J = 16.4$  Hz,  $J = 10.0$  Hz,  $J = 6.4$  Hz, 1H), 3.35 (s, 3H), 3.12 – 2.94 (m, 2H), 2.41 (s, 3H);  $^{13}\text{C}$  NMR (100 MHz,  $\text{CDCl}_3$ )  $\delta$  144.6, 140.8, 139.7, 135.5, 134.5, 131.4, 130.5, 129.7, 128.3, 128.2, 127.8(7), 127.8(5), 127.8(1), 127.5(3), 127.4(7), 127.4(0), 127.0, 122.7, 82.5, 82.4, 71.0, 57.1, 52.5, 31.4, 21.6; IR (neat): 2927, 2821, 2234(s), 1492, 1451, 1367, 1169, 1089, 755, 692, 546; HRESIMS Calcd for  $[\text{C}_{31}\text{H}_{29}\text{NNaO}_3\text{S}]^+$  ( $\text{M} + \text{Na}^+$ ) 518.1760, found 518.1762.

***(S)*-*N*-(1,10-bis(3,5-di-*tert*-butyl-4-methoxyphenyl)-12-oxido-4,5,6,7-tetrahydroindeno[7,1-de:1',7'-*fg*][1,3,2]dioxaphosphocin-12-yl)-1,1,1-trifluoromethanesulfonamide (Cat. 3)**

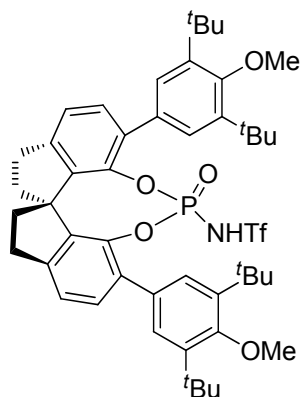

**Cat. 3**

Compound **Cat. 3** was prepared according to the reported procedure.<sup>18</sup> White solid (mp 156-157 °C). <sup>1</sup>H NMR (400 MHz, CDCl<sub>3</sub>) δ 7.45 (s, 2H), 7.36 (dd, *J* = 7.6 Hz, *J* = 0.4 Hz, 1H), 7.25 – 7.18 (m, 5H), 3.70 (s, 3H), 3.67 (s, 3H), 3.21 – 3.06 (m, 2H), 3.00 – 2.88 (m, 2H), 2.41 – 2.32 (m, 2H), 2.29 – 2.16 (m, 2H), 1.41 (s, 18H), 1.39 (s, 18H); <sup>13</sup>C NMR (125 MHz, CDCl<sub>3</sub>) <sup>13</sup>C NMR (100 MHz, CDCl<sub>3</sub>) δ 159.7, 159.0, 145.8 (d, *J* = 2.4 Hz), 144.9 (d, *J* = 2.4 Hz), 144.5, 142.9, 141.7 (d, *J* = 10.0 Hz), 140.4, 140.3 (d, *J* = 0.9 Hz), 140.2, 140.1 (d, *J* = 3.4 Hz), 136.5 (d, *J* = 3.9 Hz), 133.4 (d, *J* = 4.1 Hz), 131.7, 131.6 (d, *J* = 2.1 Hz), 130.7, 130.1, 128.3, 128.1, 123.6 (d, *J* = 2.4 Hz), 123.3 (d, *J* = 2.3 Hz), 64.2, 64.1, 60.3(7), 60.3(6), 39.0, 38.5, 35.9, 35.7, 31.9(2), 31.9(0), 30.2; <sup>31</sup>P NMR (162 MHz, CDCl<sub>3</sub>) δ -15.7(s); <sup>19</sup>F NMR (376 MHz, CDCl<sub>3</sub>) δ -77.6(s); IR (neat): 3452(bs), 2923, 1462, 1413, 1397, 1302, 1263, 1211, 1186, 1093, 1021, 891, 628; HRESIMS Calcd for [C<sub>48</sub>H<sub>59</sub>F<sub>3</sub>NNaO<sub>7</sub>PS]<sup>+</sup> (M + Na<sup>+</sup>) 904.3594, found 904.3595.

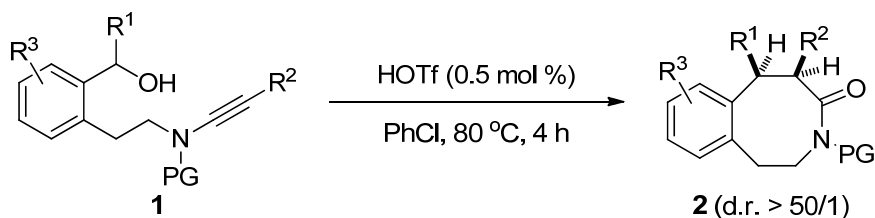

**Supplementary Figure 147.** Synthesis of 3-benzazocinones **2**.

**General procedure for the synthesis of 3-benzazocinones 2:**

To a mixture of the ynamide **1** (0.20 mmol) in PhCl (3.75 mL) at room temperature, HOTf(0.001 mmol/0.25 mL) in 0.25 mL PhCl was added. Then, the reaction mixture was stirred at 80 °C and the progress of the reaction was monitored by TLC. The reaction typically took 4 h. Upon completion, the mixture was concentrated and the residue was purified by chromatography on silica gel (eluent: hexanes/ethyl acetate) to afford the desired 3-benzazocinones **2**.

**5,6-diphenyl-3-tosyl-2,3,5,6-tetrahydrobenzo[d]azocin-4(1H)-one (2a)**

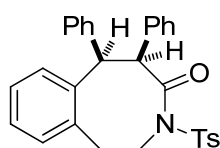

**2a**

Compound **2a** was prepared in 94% yield (90.6 mg) according to the general procedure (Table 2, entry 1). Pale yellow solid (mp 177-178 °C). <sup>1</sup>H NMR (500 MHz, CDCl<sub>3</sub>) δ 7.48 (d, *J* = 8.5 Hz, 2H), 7.21 (d, *J* = 4.0 Hz, 2H), 7.19 – 7.16 (m, 2H), 7.15 – 7.05 (m, 7H), 7.04 – 6.98 (m, 2H), 6.87 (d, *J* = 7.5 Hz, 2H), 6.83 (d, *J* = 8.0 Hz, 1H), 5.06 (d, *J* = 5.0 Hz, 1H), 4.93 (d, *J* = 5.0 Hz, 1H), 4.70 – 4.59 (m, 1H), 3.97 – 3.87 (m, 1H), 3.54 – 3.44 (m, 1H), 3.19 – 3.10 (m, 1H), 2.37 (s, 3H); <sup>13</sup>C NMR (125 MHz, CDCl<sub>3</sub>) δ 173.5, 143.9, 140.7, 138.9, 137.3, 137.0, 136.0, 131.4, 131.3, 129.8, 129.7, 129.1, 128.5, 127.8, 127.6, 127.1, 127.0, 126.5, 55.7, 54.1, 45.5, 36.1, 21.5; IR (neat): 2962, 2927, 1643(s), 1454, 1260, 1164, 1087, 1018, 799, 699, 561; HRESIMS Calcd for [C<sub>30</sub>H<sub>27</sub>NNaO<sub>3</sub>S]<sup>+</sup> (M + Na<sup>+</sup>) 504.1604, found 504.1604.

***N*-(2-(hydroxy(phenyl)methyl)phenethyl)-2-phenyl-*N*-tosylacetamide (2a')**

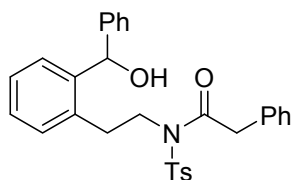

**2a'**

Pale yellow oil. <sup>1</sup>H NMR (500 MHz, CDCl<sub>3</sub>) δ 7.65 (d, *J* = 8.0 Hz, 2H), 7.37 – 7.32 (m, 3H), 7.31 – 7.21 (m, 11H), 7.06 – 7.01 (m, 2H), 6.17 (s, 1H), 3.97 (ddd, *J* = 16.0 Hz, *J* =

11.0 Hz,  $J = 5.5$  Hz, 1H), 3.91 (s, 2H), 3.90 – 3.83 (m, 1H), 3.09 (ddd,  $J = 15.5$  Hz,  $J = 10.5$  Hz,  $J = 5.5$  Hz, 1H), 2.98 (ddd,  $J = 16.5$  Hz,  $J = 11.0$  Hz,  $J = 6.0$  Hz, 1H), 2.89 (s, 1H), 2.41 (s, 3H);  $^{13}\text{C}$  NMR (125 MHz,  $\text{CDCl}_3$ )  $\delta$  171.2, 145.0, 143.4, 141.9, 136.4, 135.6, 133.4, 130.8, 129.9, 129.4, 128.5, 128.3, 127.9, 127.8, 127.4, 127.3, 127.2, 127.1, 126.8, 72.7, 48.3, 42.7, 33.0, 21.6; IR (neat): 3465, 2956, 2922, 1692(s), 1597, 1453, 1351, 1158, 1084, 724, 697; HRESIMS Calcd for  $[\text{C}_{30}\text{H}_{29}\text{NNaO}_4\text{S}]^+$  ( $\text{M} + \text{Na}^+$ ) 522.1710, found 522.1716.

**5,6-diphenyl-3-(phenylsulfonyl)-2,3,5,6-tetrahydrobenzo[*d*]azocin-4(1*H*)-one (2b)**

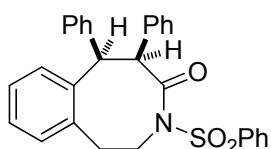

**2b**

Compound **2b** was prepared in 89% yield (83.2 mg) according to the general procedure except by using 1 mol % of HOTf as catalyst (Table 2, entry 2). Pale yellow oil.  $^1\text{H}$  NMR (500 MHz,  $\text{CDCl}_3$ )  $\delta$  7.58 (d,  $J = 7.5$  Hz, 2H), 7.52 – 7.47 (m, 1H), 7.35 – 7.29 (m, 2H), 7.24 – 7.20 (m, 2H), 7.19 – 7.16 (m, 2H), 7.14 – 7.11 (m, 3H), 7.10 – 7.05 (m, 2H), 7.04 – 6.98 (m, 2H), 6.85 (d,  $J = 7.5$  Hz, 2H), 6.82 (d,  $J = 8.0$  Hz, 1H), 5.08 (d,  $J = 5.5$  Hz, 1H), 4.92 (d,  $J = 5.5$  Hz, 1H), 4.73 – 4.63 (m, 1H), 3.99 – 3.89 (m, 1H), 3.57 – 3.47 (m, 1H), 3.22 – 3.13 (m, 1H);  $^{13}\text{C}$  NMR (125 MHz,  $\text{CDCl}_3$ )  $\delta$  173.5, 140.7, 139.1, 138.8, 137.1, 136.8, 133.0, 131.5, 131.3, 129.9, 129.8, 128.5, 127.8(9), 127.8(6), 127.7, 127.2, 127.0, 126.6, 55.5, 54.2, 45.4, 36.0; IR (neat): 2925, 2848, 1696(s), 1494, 1449, 1350, 1167, 1088, 699, 596; HRESIMS Calcd for  $[\text{C}_{29}\text{H}_{25}\text{NNaO}_3\text{S}]^+$  ( $\text{M} + \text{Na}^+$ ) 490.1447, found 490.1447.

**3-((4-bromophenyl)sulfonyl)-5,6-diphenyl-2,3,5,6-tetrahydrobenzo[*d*]azocin-4(1*H*)-one (2c)**

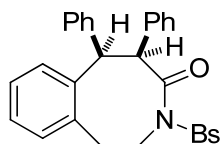

**2c**

Compound **2c** was prepared in 73% yield (79.7 mg) according to the general procedure except by using 1 mol % of HOTf as catalyst (Table 2, entry 3). Pale yellow solid (mp 190-191 °C). <sup>1</sup>H NMR (400 MHz, CDCl<sub>3</sub>) δ 7.47 – 7.38 (m, 4H), 7.26 – 7.19 (m, 4H), 7.18 – 7.08 (m, 5H), 7.05 – 6.99 (m, 2H), 6.89 – 6.80 (m, 3H), 5.04 (d, *J* = 5.2 Hz, 1H), 4.89 (d, *J* = 5.2 Hz, 1H), 4.78 – 4.68 (m, 1H), 3.94 (ddd, *J* = 15.6 Hz, *J* = 6.0 Hz, *J* = 2.4 Hz, 1H), 3.55 – 3.45 (m, 1H), 3.16 (ddd, *J* = 14.8 Hz, *J* = 5.6 Hz, *J* = 2.0 Hz, 1H); <sup>13</sup>C NMR (100 MHz, CDCl<sub>3</sub>) δ 173.3, 140.9, 138.3, 137.9, 137.3, 136.8, 131.7, 131.5, 131.3, 130.2, 129.8, 129.6, 128.3, 128.0, 127.9, 127.8, 127.3, 127.1, 126.6, 55.2, 54.4, 45.3, 35.9; IR (neat): 3028, 2927, 1698(s), 1573, 1390, 1351, 1168, 1084, 737, 700, 542; HRESIMS Calcd for [C<sub>29</sub>H<sub>24</sub>BrNNaO<sub>3</sub>S]<sup>+</sup> (M + Na<sup>+</sup>) 568.0552, found 568.0551.

**5-(4-fluorophenyl)-6-phenyl-3-tosyl-2,3,5,6-tetrahydrobenzo[*d*]azocin-4(1*H*)-one (2d)**

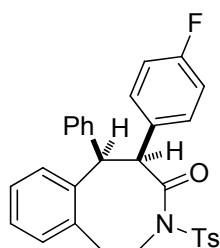

**2d**

Compound **2d** was prepared in 87% yield (86.9 mg) according to the general procedure (Table 2, entry 4). Pale yellow oil. <sup>1</sup>H NMR (400 MHz, CDCl<sub>3</sub>) δ 7.44 (d, *J* = 8.4 Hz, 2H), 7.22 (d, *J* = 4.0 Hz, 2H), 7.16 – 7.06 (m, 6H), 7.05 – 6.99 (m, 2H), 6.84 – 6.75 (m, 5H), 5.08 (d, *J* = 6.0 Hz, 1H), 4.87 (d, *J* = 5.6 Hz, 1H), 4.72 – 4.60 (m, 1H), 3.93 (ddd, *J* = 15.2 Hz, *J* = 6.0 Hz, *J* = 3.2 Hz, 1H), 3.58 – 3.48 (m, 1H), 3.16 (ddd, *J* = 14.4 Hz, *J* = 6.0 Hz, *J* = 3.2 Hz, 1H), 2.38 (s, 3H); <sup>13</sup>C NMR (100 MHz, CDCl<sub>3</sub>) δ 173.5, 161.7 (*J* = 244.8 Hz), 144.0, 140.3, 138.6, 136.7, 135.9, 132.7 (*J* = 3.3 Hz), 131.5(3) (*J* = 7.7 Hz), 131.5(1), 131.2, 130.0, 129.1, 128.5, 127.9, 127.7, 127.1, 126.6, 114.6 (*J* = 21.0 Hz), 54.6, 54.3, 45.3, 35.9, 21.5; IR (neat): 2925, 1698(s), 1508, 1346, 1165, 1119, 1086, 736, 703, 546; HRESIMS Calcd for [C<sub>30</sub>H<sub>26</sub>FNNaO<sub>3</sub>S]<sup>+</sup> (M + Na<sup>+</sup>) 522.1510, found 522.1504.

**5-(4-chlorophenyl)-6-phenyl-3-tosyl-2,3,5,6-tetrahydrobenzo[*d*]azocin-4(1*H*)-one (2e)**

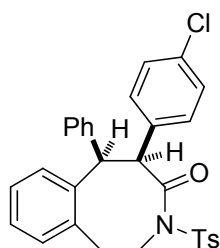

**2e**

Compound **2e** was prepared in 93% yield (96.0 mg) according to the general procedure (Table 2, entry 5). Pale yellow solid (mp 179-180 °C). <sup>1</sup>H NMR (400 MHz, CDCl<sub>3</sub>) δ 7.44 (d, *J* = 8.4 Hz, 2H), 7.22 (m, *J* = 5.2 Hz, 2H), 7.13 – 7.06 (m, 8H), 7.05 – 7.00 (m, 2H), 6.84 – 6.77 (m, 3H), 5.06 (d, *J* = 6.0 Hz, 1H), 4.88 (d, *J* = 5.6 Hz, 1H), 4.72 – 4.59 (m, 1H), 3.92 (ddd, *J* = 15.2 Hz, *J* = 5.6 Hz, *J* = 2.8 Hz, 1H), 3.59 – 3.42 (m, 1H), 3.15 (ddd, *J* = 14.4 Hz, *J* = 5.6 Hz, *J* = 2.8 Hz, 1H), 2.38 (s, 3H); <sup>13</sup>C NMR (125 MHz, CDCl<sub>3</sub>) δ 173.3, 144.1, 140.2, 138.4, 136.7, 135.9, 135.5, 132.9, 131.5, 131.2, 131.1, 130.0, 129.1, 128.5, 127.9, 127.8, 127.7, 127.1, 126.7, 54.7, 54.0, 45.4, 35.8, 21.5; IR (neat): 2924, 1697(s), 1596, 1492, 1346, 1164, 1088, 747, 703, 543; HRESIMS Calcd for [C<sub>30</sub>H<sub>26</sub>ClNNaO<sub>3</sub>S]<sup>+</sup> (M + Na<sup>+</sup>) 538.1214, found 538.1214.

**5-(4-bromophenyl)-6-phenyl-3-tosyl-2,3,5,6-tetrahydrobenzo[d]azocin-4(1H)-one (2f)**

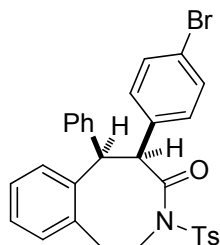

**2f**

Compound **2f** was prepared in 88% yield (98.6 mg) according to the general procedure (Table 2, entry 6). Yellow solid (mp 199-200 °C). <sup>1</sup>H NMR (400 MHz, CDCl<sub>3</sub>) δ 7.44 (d, *J* = 8.4 Hz, 2H), 7.26 – 7.21 (m, 4H), 7.14 – 7.07 (m, 4H), 7.06 – 6.98 (m, 4H), 6.84 – 6.76 (m, 3H), 5.04 (d, *J* = 6.0 Hz, 1H), 4.88 (d, *J* = 6.0 Hz, 1H), 4.71 – 4.58 (m, 1H), 3.92 (ddd, *J* = 15.6 Hz, *J* = 6.0 Hz, *J* = 2.4 Hz, 1H), 3.57 – 3.45 (m, 1H), 3.15 (ddd, *J* = 14.4 Hz, *J* = 6.0 Hz, *J* = 2.8 Hz, 1H), 2.38 (s, 3H); <sup>13</sup>C NMR (100 MHz, CDCl<sub>3</sub>) δ 173.2, 144.1, 140.2, 138.4, 136.7, 136.0, 135.8, 131.6, 131.5, 131.2, 130.8, 129.9, 129.1, 128.5, 127.9,

127.7, 127.1, 126.7, 121.2, 54.8, 54.0, 45.4, 35.9, 21.5; IR (neat): 2925, 1698(s), 1489, 1346, 1165, 1118, 1086, 1011, 702, 542; HRESIMS Calcd for  $[C_{30}H_{26}BrNNaO_3S]^+$  ( $M + Na^+$ ) 582.0709, found 582.0709.

**4-(4-oxo-6-phenyl-3-tosyl-1,2,3,4,5,6-hexahydrobenzo[d]azocin-5-yl)benzonitrile (2g)**

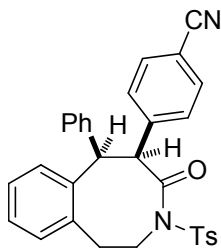

**2g**

Compound **2g** was prepared in 96% yield (97.3 mg) according to the general procedure (Table 2, entry 7). Pale yellow solid (mp 181-182 °C).  $^1H$  NMR (500 MHz,  $CDCl_3$ )  $\delta$  7.41 (d,  $J = 8.5$  Hz, 2H), 7.36 (d,  $J = 8.5$  Hz, 2H), 7.31 (d,  $J = 8.5$  Hz, 2H), 7.25 – 7.21 (m, 2H), 7.14 – 7.06 (m, 4H), 7.05 – 6.99 (m, 2H), 6.81 – 6.71 (m, 3H), 5.14 (d,  $J = 6.5$  Hz, 1H), 4.87 (d,  $J = 6.5$  Hz, 1H), 4.79 – 4.67 (m, 1H), 3.96 (ddd,  $J = 15.5$  Hz,  $J = 6.5$  Hz,  $J = 4.0$  Hz, 1H), 3.61 – 3.50 (m, 1H), 3.21 (ddd,  $J = 14.5$  Hz,  $J = 7.0$  Hz,  $J = 4.5$  Hz, 1H), 2.39 (s, 3H);  $^{13}C$  NMR (100 MHz,  $CDCl_3$ )  $\delta$  172.3, 144.2, 142.3, 139.7, 137.8, 136.1, 135.6, 131.5, 131.3, 130.9, 130.5, 130.1, 129.0, 128.4, 128.0, 127.8, 127.1, 126.9, 118.6, 110.6, 54.1, 54.0, 45.0, 35.4, 21.5; IR (neat): 2925, 2227, 1635(s), 1453, 1345, 1164, 1118, 1087, 733, 543; HRESIMS Calcd for  $[C_{31}H_{26}N_2NaO_3S]^+$  ( $M + Na^+$ ) 529.1556, found 529.1555.

**6-phenyl-3-tosyl-5-(4-(trifluoromethyl)phenyl)-2,3,5,6-tetrahydrobenzo[d]azocin-4(1H)-one (2h)**

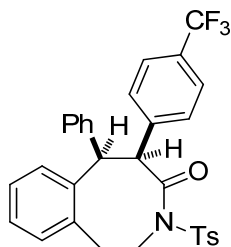

**2h**



Compound **2h** was prepared in 96% yield (105.5 mg) according to the general procedure (Table 2, entry 8). Pale yellow oil. <sup>1</sup>H NMR (400 MHz, CDCl<sub>3</sub>) δ 7.45 (d, *J* = 8.4 Hz, 2H), 7.38 (d, *J* = 8.0 Hz, 2H), 7.30 (d, *J* = 8.0 Hz, 2H), 7.27 – 7.20 (m, 2H), 7.17 – 7.07 (m, 4H), 7.06 – 6.97 (m, 2H), 6.87 – 6.69 (m, 3H), 5.13 (d, *J* = 5.6 Hz, 1H), 4.91 (d, *J* = 5.6 Hz, 1H), 4.78 – 4.60 (m, 1H), 4.02 – 3.82 (m, 1H), 3.62 – 3.41 (m, 1H), 3.27 – 3.08 (m, 1H), 2.39 (s, 3H); <sup>13</sup>C NMR (100 MHz, CDCl<sub>3</sub>) δ 172.9, 144.2, 141.2, 140.2, 138.2, 136.7, 135.8, 131.6, 131.2, 130.2, 129.9, 129.1, 128.5, 128.0, 127.9, 127.2, 126.8, 124.6 (q, *J* = 3.5 Hz), 55.0, 54.1, 45.4, 35.8, 21.5; IR (neat): 2927, 1698(s), 1454, 1325, 1165, 1120, 1069, 737, 677, 542; HRESIMS Calcd for [C<sub>31</sub>H<sub>26</sub>F<sub>3</sub>NNaO<sub>3</sub>S]<sup>+</sup> (M + Na<sup>+</sup>) 572.1478, found 572.1479.

**6-phenyl-5-(*p*-tolyl)-3-tosyl-2,3,5,6-tetrahydrobenzo[*d*]azocin-4(1*H*)-one (2i)**

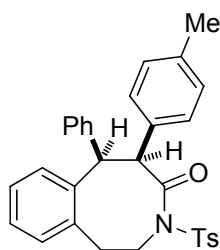

**2i**

Compound **2i** was prepared in 82% yield (81.3 mg) according to the general procedure (Table 2, entry 9). Pale yellow solid (mp 174-175 °C). <sup>1</sup>H NMR (500 MHz, CDCl<sub>3</sub>) δ 7.52 (d, *J* = 8.0 Hz, 2H), 7.25 – 7.22 (m, 2H), 7.15 – 7.01 (m, 8H), 6.97 (d, *J* = 8.0 Hz, 2H), 6.91 (d, *J* = 7.5 Hz, 2H), 6.86 (d, *J* = 8.0 Hz, 1H), 5.01 (d, *J* = 4.5 Hz, 1H), 4.95 (d, *J* = 4.5 Hz, 1H), 4.66 – 4.53 (m, 1H), 3.97 – 3.86 (m, 1H), 3.52 – 3.38 (m, 1H), 3.18 – 3.07 (m, 1H), 2.40 (s, 3H), 2.25 (s, 3H); <sup>13</sup>C NMR (125 MHz, CDCl<sub>3</sub>) δ 174.0, 144.0, 141.0, 139.2, 137.5, 136.7, 136.2, 134.4, 131.5, 129.7, 129.6, 129.1, 128.7, 128.6, 127.9, 127.6, 127.1, 126.5, 56.2, 54.0, 45.7, 36.4, 21.5, 20.9; IR (neat): 2923, 1698(s), 1597, 1494, 1347, 1165, 1119, 1087, 735, 547; HRESIMS Calcd for [C<sub>31</sub>H<sub>29</sub>NNaO<sub>3</sub>S]<sup>+</sup> (M + Na<sup>+</sup>) 518.1760, found 518.1759.

**5-(4-methoxyphenyl)-6-phenyl-3-tosyl-2,3,5,6-tetrahydrobenzo[*d*]azocin-4(1*H*)-one (2j)**

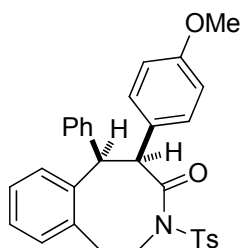

**2j**

Compound **2j** was prepared in 89% yield (91.1 mg) according to the general procedure (Table 2, entry 10). Pale yellow solid (mp 181-182 °C). <sup>1</sup>H NMR (400 MHz, CDCl<sub>3</sub>) δ 7.48 (d, *J* = 8.4 Hz, 2H), 7.23 – 7.19 (m, 2H), 7.14 – 7.00 (m, 8H), 6.88 – 6.81 (m, 3H), 6.68 (d, *J* = 8.4 Hz, 2H), 5.03 (d, *J* = 5.2 Hz, 1H), 4.92 (d, *J* = 5.2 Hz, 1H), 4.66 – 4.52 (m, 1H), 3.92 (ddd, *J* = 15.6 Hz, *J* = 5.2 Hz, *J* = 1.2 Hz, 1H), 3.71 (s, 3H), 3.55 – 3.42 (m, 1H), 3.20 – 3.07 (m, 1H), 2.39 (s, 3H); <sup>13</sup>C NMR (100 MHz, CDCl<sub>3</sub>) δ 174.1, 158.5, 144.0, 140.7, 139.1, 137.1, 136.0, 131.5, 131.4, 131.0, 129.8, 129.2, 129.1, 128.5, 127.9, 127.6, 127.1, 126.5, 113.2, 55.4, 55.1, 54.1, 45.5, 36.2, 21.5; IR (neat): 2924, 1697(s), 1512, 1347, 1251, 1165, 1118, 1087, 735, 549; HRESIMS Calcd for [C<sub>31</sub>H<sub>29</sub>NNaO<sub>4</sub>S]<sup>+</sup> (M + Na<sup>+</sup>) 534.1710, found 534.1711.

**5-(3-bromophenyl)-6-phenyl-3-tosyl-2,3,5,6-tetrahydrobenzo[d]azocin-4(1H)-one (2k)**

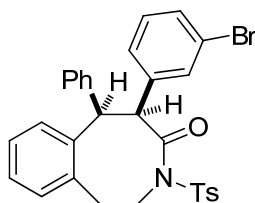

**2k**

Compound **2k** was prepared in 80% yield (89.7 mg) according to the general procedure (Table 2, entry 11). Pale yellow solid (mp 193-194 °C). <sup>1</sup>H NMR (500 MHz, CDCl<sub>3</sub>) δ 7.45 (d, *J* = 8.0 Hz, 2H), 7.31 – 7.29 (m, 1H), 7.28 – 7.22 (m, 3H), 7.15 – 7.10 (m, 5H), 7.07 – 7.03 (m, 2H), 7.01 – 6.97 (m, 1H), 6.85 – 6.79 (m, 3H), 5.03 (d, *J* = 6.0 Hz, 1H), 4.87 (d, *J* = 6.0 Hz, 1H), 4.73 – 4.63 (m, 1H), 3.92 (ddd, *J* = 15.5 Hz, *J* = 6.0 Hz, *J* = 2.5 Hz, 1H), 3.57 – 3.46 (m, 1H), 3.17 (ddd, *J* = 15.0 Hz, *J* = 6.0 Hz, *J* = 2.5 Hz, 1H), 2.40 (s, 3H); <sup>13</sup>C NMR (100 MHz, CDCl<sub>3</sub>) δ 172.9, 144.1, 140.3, 139.3, 138.3, 136.8, 135.9, 132.9, 131.6, 131.3, 130.2, 129.9, 129.3, 129.1, 128.6, 128.0, 127.8, 127.2, 126.8, 121.8,

55.0, 54.2, 45.4, 36.0, 21.6; IR (neat): 2921, 1697(s), 1596, 1453, 1345, 1165, 1119, 735, 591; HRESIMS Calcd for  $[C_{30}H_{26}BrNNaO_3S]^+$  ( $M + Na^+$ ) 582.0709, found 582.0706.

**6-phenyl-5-(*m*-tolyl)-3-tosyl-2,3,5,6-tetrahydrobenzo[*d*]azocin-4(1*H*)-one (2l)**

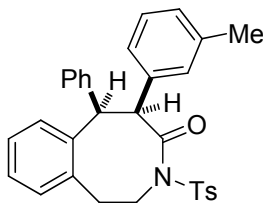

**2l**

Compound **2l** was prepared in 79% yield (78.3 mg) according to the general procedure (Table 2, entry 12). Pale yellow solid (mp 182-183 °C).  $^1H$  NMR (400 MHz,  $CDCl_3$ )  $\delta$  7.51 (d,  $J = 8.4$  Hz, 2H), 7.25 – 7.21 (m, 2H), 7.15 – 6.95 (m, 10H), 6.91 – 6.85 (m, 3H), 5.00 (d,  $J = 4.8$  Hz, 1H), 4.93 (d,  $J = 4.8$  Hz, 1H), 4.71 – 4.59 (m, 1H), 3.92 (ddd,  $J = 16.0$  Hz,  $J = 5.2$  Hz,  $J = 4.8$  Hz, 1H), 3.53 – 3.42 (m, 1H), 3.18 – 3.09 (m, 1H), 2.40 (s, 3H), 2.21 (s, 3H);  $^{13}C$  NMR (125 MHz,  $CDCl_3$ )  $\delta$  173.7, 144.0, 141.0, 139.1, 137.5, 137.4, 137.3, 136.2, 132.0, 131.5, 130.6, 129.7, 129.1, 128.9, 128.6, 127.9, 127.8, 127.6, 127.1, 126.8, 126.5, 56.2, 54.1, 45.6, 36.4, 21.5, 21.3; IR (neat): 2922, 1699(s), 1454, 1347, 1165, 1120, 1088, 913, 734, 671; HRESIMS Calcd for  $[C_{31}H_{29}NNaO_3S]^+$  ( $M + Na^+$ ) 518.1760, found 518.1762.

**5-(naphthalen-2-yl)-6-phenyl-3-tosyl-2,3,5,6-tetrahydrobenzo[*d*]azocin-4(1*H*)-one (2m)**

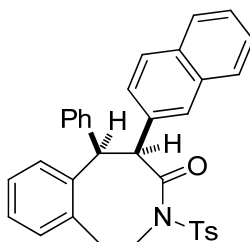

**2m**

Compound **2m** was prepared in 99% yield (105.3 mg) according to the general procedure (Table 2, entry 13). Pale yellow solid (mp 202-203 °C).  $^1H$  NMR (500 MHz,  $CDCl_3$ )  $\delta$  7.73 – 7.69 (m, 1H), 7.67 – 7.62 (m, 2H), 7.61 (d,  $J = 8.5$  Hz, 1H), 7.52 (d,  $J = 8.5$  Hz,

2H), 7.41 – 7.35 (m, 2H), 7.27 (dd,  $J = 8.5$  Hz,  $J = 1.5$  Hz, 1H), 7.24 – 7.21 (m, 2H), 7.14 – 7.09 (m, 3H), 7.08 – 7.03 (m, 1H), 7.02 – 6.96 (m, 2H), 6.93 (d,  $J = 7.5$  Hz, 2H), 6.85 (d,  $J = 7.5$  Hz, 1H), 5.21 (d,  $J = 5.5$  Hz, 1H), 5.05 (d,  $J = 5.0$  Hz, 1H), 4.71 – 4.60 (m, 1H), 3.96 (ddd,  $J = 15.5$  Hz,  $J = 5.0$  Hz,  $J = 4.0$  Hz, 1H), 3.55 – 3.46 (m, 1H), 3.16 (ddd,  $J = 15.0$  Hz,  $J = 5.0$  Hz,  $J = 4.0$  Hz, 1H), 2.37 (s, 3H);  $^{13}\text{C}$  NMR (125 MHz,  $\text{CDCl}_3$ )  $\delta$  173.7, 144.0, 140.9, 139.0, 137.3, 136.0, 134.8, 132.9, 132.3, 131.5, 131.4, 129.7, 129.1, 128.7, 128.5, 128.0, 127.9, 127.8, 127.7, 127.4, 127.3, 127.1, 126.5, 125.9, 125.8, 56.2, 54.0, 45.6, 36.2, 21.5; IR (neat): 2919, 1633(s), 1449, 1341, 1162, 1115, 1084, 700, 670, 544; HRESIMS Calcd for  $[\text{C}_{34}\text{H}_{29}\text{NNaO}_3\text{S}]^+$  ( $\text{M} + \text{Na}^+$ ) 554.1760, found 554.1761.

**6-phenyl-5-(thiophen-2-yl)-3-tosyl-2,3,5,6-tetrahydrobenzo[*d*]azocin-4(1*H*)-one (2n)**

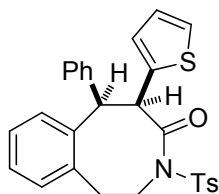

**2n**

Compound **2n** was prepared in 81% yield (80.0 mg) according to the general procedure (Table 2, entry 14). Pale yellow oil.  $^1\text{H}$  NMR (400 MHz,  $\text{CDCl}_3$ )  $\delta$  7.44 (d,  $J = 8.4$  Hz, 2H), 7.25 (d,  $J = 4.8$  Hz, 2H), 7.15 – 7.09 (m, 4H), 7.09 – 7.02 (m, 3H), 6.88 – 6.81 (m, 3H), 6.81 – 6.75 (m, 2H), 5.43 (d,  $J = 6.0$  Hz, 1H), 4.86 (d,  $J = 5.6$  Hz, 1H), 4.70 – 4.57 (m, 1H), 3.95 (ddd,  $J = 15.6$  Hz,  $J = 6.0$  Hz,  $J = 3.6$  Hz, 1H), 3.58 – 3.46 (m, 1H), 3.23 (ddd,  $J = 14.4$  Hz,  $J = 6.4$  Hz,  $J = 3.2$  Hz, 1H), 2.38 (s, 3H);  $^{13}\text{C}$  NMR (100 MHz,  $\text{CDCl}_3$ )  $\delta$  172.5, 144.1, 139.9, 138.6, 138.5, 136.9, 135.9, 131.5, 131.3, 130.0, 129.1, 128.6, 127.9, 127.8, 127.2, 127.1, 126.7, 125.7, 125.5, 55.3, 51.4, 45.1, 36.1, 21.5; IR (neat): 2930, 1640(s), 1457, 1396, 1349, 1152, 1086, 736, 680, 559; HRESIMS Calcd for  $[\text{C}_{28}\text{H}_{25}\text{NNaO}_3\text{S}_2]^+$  ( $\text{M} + \text{Na}^+$ ) 510.1168, found 510.1170.

**6-phenyl-5-((*E*)-styryl)-3-tosyl-2,3,5,6-tetrahydrobenzo[*d*]azocin-4(1*H*)-one (2o)**

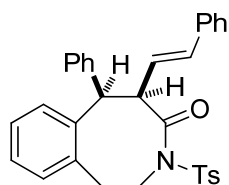

**2o**

Compound **2o** was prepared in 94% yield (95.4 mg) according to the general procedure (Table 2, entry 15). Pale yellow oil.  $^1\text{H}$  NMR (500 MHz,  $\text{CDCl}_3$ )  $\delta$  7.45 (d,  $J = 8.0$  Hz, 2H), 7.23 – 7.15 (m, 7H), 7.15 – 7.02 (m, 8H), 6.78 (d,  $J = 7.5$  Hz, 1H), 6.42 (d,  $J = 16.0$  Hz, 1H), 6.04 (dd,  $J = 15.5$  Hz,  $J = 8.0$  Hz, 1H), 4.76 (d,  $J = 6.0$  Hz, 1H), 4.62 – 4.53 (m, 1H), 4.52 – 4.41 (m, 1H), 4.08 – 3.98 (m, 1H), 3.57 – 3.46 (m, 1H), 3.26 – 3.16 (m, 1H), 2.37 (s, 3H);  $^{13}\text{C}$  NMR (125 MHz,  $\text{CDCl}_3$ )  $\delta$  174.2, 144.0, 140.0, 139.4, 136.9, 136.6, 136.1, 132.7, 130.9, 130.6, 130.0, 129.1, 128.4, 128.2, 127.6, 127.1, 126.8, 126.4, 126.3, 54.3, 52.6, 45.0, 35.6, 21.5; IR (neat): 2925, 1692(s), 1494, 1449, 1347, 1165, 1118, 1086, 909, 733, 545; HRESIMS Calcd for  $[\text{C}_{32}\text{H}_{29}\text{NNaO}_3\text{S}]^+$  ( $\text{M} + \text{Na}^+$ ) 530.1760, found 530.1766.

**8-methyl-5,6-diphenyl-3-tosyl-2,3,5,6-tetrahydrobenzo[d]azocin-4(1H)-one (2p)**

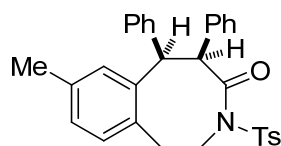

**2p**

Compound **2p** was prepared in 84% yield (83.3 mg) according to the general procedure (Table 2, entry 16). Pale yellow solid (mp 179-180 °C).  $^1\text{H}$  NMR (500 MHz,  $\text{CDCl}_3$ )  $\delta$  7.53 (d,  $J = 8.5$  Hz, 2H), 7.23 – 7.14 (m, 5H), 7.13 – 7.05 (m, 4H), 7.03 – 6.98 (m, 3H), 6.90 (d,  $J = 7.5$  Hz, 2H), 6.65 (s, 1H), 5.02 (d,  $J = 5.0$  Hz, 1H), 4.90 (d,  $J = 4.5$  Hz, 1H), 4.70 – 4.59 (m, 1H), 3.88 (ddd,  $J = 16.0$  Hz,  $J = 5.0$  Hz,  $J = 4.5$  Hz, 1H), 3.46 – 3.37 (m, 1H), 3.11 – 3.03 (m, 1H), 2.39 (s, 3H), 2.18 (s, 3H);  $^{13}\text{C}$  NMR (125 MHz,  $\text{CDCl}_3$ )  $\delta$  173.7, 143.9, 140.7, 138.8, 137.7, 136.7, 136.1, 134.2, 132.1, 131.5, 129.8, 129.7, 129.0, 128.7, 128.2, 127.9, 127.8, 127.1, 126.4, 56.1, 54.2, 45.9, 35.8, 21.5, 21.0; IR (neat): 2924, 1698(s), 1496, 1454, 1347, 1166, 1118, 1087, 699, 540; HRESIMS Calcd for  $[\text{C}_{31}\text{H}_{29}\text{NNaO}_3\text{S}]^+$  ( $\text{M} + \text{Na}^+$ ) 518.1760, found 518.1760.

***N*-(2-(hydroxy(phenyl)methyl)-4-methylphenethyl)-2-phenyl-*N*-tosylacetamide (2p')**

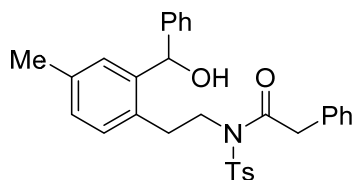

**2p'**

Pale yellow oil.  $^1\text{H}$  NMR (400 MHz,  $\text{CDCl}_3$ )  $\delta$  7.65 (d,  $J = 8.4$  Hz, 2H), 7.37 – 7.23 (m, 10H), 7.20 – 7.17 (m, 1H), 7.11 (d,  $J = 7.6$  Hz, 1H), 7.06 – 6.99 (m, 3H), 6.14 (d,  $J = 1.6$  Hz, 1H), 4.00 – 3.81 (m, 4H), 3.05 (ddd,  $J = 15.6$  Hz,  $J = 10.4$  Hz,  $J = 5.6$  Hz, 1H), 2.94 (ddd,  $J = 16.4$  Hz,  $J = 10.4$  Hz,  $J = 6.0$  Hz, 1H), 2.75 (d,  $J = 3.6$  Hz, 1H), 2.41 (s, 3H), 2.29 (s, 3H);  $^{13}\text{C}$  NMR (100 MHz,  $\text{CDCl}_3$ )  $\delta$  171.2, 145.0, 143.5, 141.6, 136.8, 136.5, 133.4, 132.5, 130.8, 129.9, 129.4, 128.7, 128.5, 128.3, 127.5, 127.3, 127.1, 126.8, 72.7, 48.4, 42.8, 32.7, 21.6, 21.1; IR (neat): 3486, 2924, 1694(s), 1495, 1453, 1355, 1161, 1087, 1032, 698, 587; HRESIMS Calcd for  $[\text{C}_{31}\text{H}_{31}\text{NNaO}_4\text{S}]^+$  ( $\text{M} + \text{Na}^+$ ) 536.1866, found 536.1865.

**8-ethyl-5,6-diphenyl-3-tosyl-2,3,5,6-tetrahydrobenzo[*d*]azocin-4(1*H*)-one (2q)**

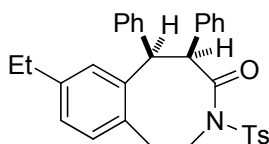

**2q**

Compound **2q** was prepared in 90% yield (91.8 mg) according to the general procedure (Table 2, entry 17). Pale yellow solid (mp 170-171 °C).  $^1\text{H}$  NMR (500 MHz,  $\text{CDCl}_3$ )  $\delta$  7.54 (d,  $J = 8.5$  Hz, 2H), 7.22 – 7.16 (m, 5H), 7.13 – 7.00 (m, 7H), 6.90 (d,  $J = 7.5$  Hz, 2H), 6.69 (d,  $J = 1.5$  Hz, 1H), 5.04 (d,  $J = 4.5$  Hz, 1H), 4.96 (d,  $J = 5.0$  Hz, 1H), 4.60 (ddd,  $J = 15.5$  Hz,  $J = 10.0$  Hz,  $J = 5.0$  Hz, 1H), 3.93 – 3.86 (m, 1H), 3.42 (ddd,  $J = 15.0$  Hz,  $J = 10.0$  Hz,  $J = 5.0$  Hz, 1H), 3.11 – 3.01 (m, 1H), 2.54 – 2.42 (m, 2H), 2.39 (s, 3H), 1.10 (t,  $J = 8.0$  Hz, 3H);  $^{13}\text{C}$  NMR (125 MHz,  $\text{CDCl}_3$ )  $\delta$  173.9, 143.9, 143.0, 140.6, 138.9, 137.6, 136.0, 134.5, 131.5, 131.1, 129.9, 129.6, 129.1, 128.6, 127.9, 127.8, 127.1, 126.9, 126.4, 56.5, 54.1, 46.0, 35.9, 28.3, 21.5, 15.3; IR (neat): 2965, 2927, 1643(s), 1455, 1346,

1166, 1118, 731, 548; HRESIMS Calcd for  $[C_{32}H_{31}NNaO_3S]^+$  ( $M + Na^+$ ) 532.1917, found 532.1914.

**8-isopropyl-5,6-diphenyl-3-tosyl-2,3,5,6-tetrahydrobenzo[d]azocin-4(1H)-one (2r)**

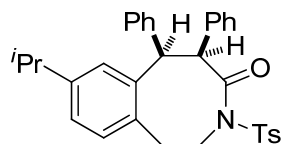

**2r**

Compound **2r** was prepared in 89% yield (93.3 mg) according to the general procedure (Table 2, entry 18). Pale yellow solid (mp 175-176 °C).  $^1H$  NMR (400 MHz,  $CDCl_3$ )  $\delta$  7.57 (d,  $J = 8.4$  Hz, 2H), 7.22 – 7.17 (m, 5H), 7.15 – 7.00 (m, 7H), 6.94 – 6.89 (m, 2H), 6.73 (d,  $J = 1.6$  Hz, 1H), 5.06 (d,  $J = 4.8$  Hz, 1H), 5.01 (d,  $J = 4.8$  Hz, 1H), 4.55 (ddd,  $J = 15.2$  Hz,  $J = 10.0$  Hz,  $J = 4.8$  Hz, 1H), 3.95 – 3.85 (m, 1H), 3.42 (ddd,  $J = 15.2$  Hz,  $J = 10.0$  Hz,  $J = 5.2$  Hz, 1H), 3.10 – 3.02 (m, 1H), 2.79 – 2.66 (m, 1H), 2.39 (s, 3H), 1.11 (d,  $J = 1.6$  Hz, 3H), 1.10 (d,  $J = 1.6$  Hz, 3H);  $^{13}C$  NMR (100 MHz,  $CDCl_3$ )  $\delta$  174.2, 147.6, 143.9, 140.5, 139.1, 137.5, 135.9, 134.7, 131.5, 130.0, 129.8, 129.6, 129.1, 128.6, 127.9, 127.8, 127.1, 126.4, 125.4, 56.9, 53.9, 46.1, 36.0, 33.5, 24.0, 23.4, 21.5; IR (neat): 2957, 1642(s), 1496, 1457, 1347, 1167, 1118, 911, 731, 676; HRESIMS Calcd for  $[C_{33}H_{33}NNaO_3S]^+$  ( $M + Na^+$ ) 546.2073, found 546.2072.

**8-methoxy-5,6-diphenyl-3-tosyl-2,3,5,6-tetrahydrobenzo[d]azocin-4(1H)-one (2s)**

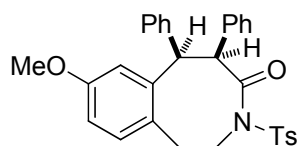

**2s**

Compound **2s** was prepared in 83% yield (85.0 mg) according to the general procedure except by using 10 mol % of  $Zn(OTf)_2$  as catalyst and 5 Å MS (60 mg/0.1 mmol) as additive (Table 2, entry 19). Pale yellow solid (mp 188-189 °C).  $^1H$  NMR (400 MHz,  $CDCl_3$ )  $\delta$  7.51 (d,  $J = 8.4$  Hz, 2H), 7.23 – 7.17 (m, 2H), 7.16 – 7.09 (m, 6H), 7.09 – 6.97 (m, 3H), 6.87 (d,  $J = 7.2$  Hz, 2H), 6.73 (dd,  $J = 8.4$  Hz,  $J = 2.8$  Hz, 1H), 6.37 (d,  $J = 2.8$  Hz, 1H), 5.07 (d,  $J = 5.6$  Hz, 1H), 4.88 (d,  $J = 5.6$  Hz, 1H), 4.67 – 4.56 (m, 1H), 3.90

(ddd,  $J = 15.2$  Hz,  $J = 5.6$  Hz,  $J = 3.6$  Hz, 1H), 3.60 (s, 3H), 3.49 – 3.39 (m, 1H), 3.09 (ddd,  $J = 14.8$  Hz,  $J = 6.0$  Hz,  $J = 3.6$  Hz, 1H), 2.39 (s, 3H);  $^{13}\text{C}$  NMR (100 MHz,  $\text{CDCl}_3$ )  $\delta$  173.5, 158.5, 143.9, 142.0, 138.6, 137.2, 136.0, 132.4, 129.9, 129.8, 129.0, 128.8, 128.6, 127.9, 127.0, 126.6, 117.5, 112.3, 55.4, 54.9, 54.3, 45.8, 35.2, 21.5; IR (neat): 2929, 1698(s), 1494, 1455, 1345, 1165, 1118, 1086, 732, 548; HRESIMS Calcd for  $[\text{C}_{31}\text{H}_{29}\text{NNaO}_4\text{S}]^+$  ( $\text{M} + \text{Na}^+$ ) 534.1710, found 534.1712.

### 5,6,8-triphenyl-3-tosyl-2,3,5,6-tetrahydrobenzo[*d*]azocin-4(1*H*)-one (2t)

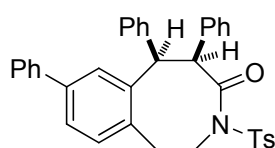

**2t**

Compound **2t** was prepared in 91% yield (101.6 mg) according to the general procedure (Table 2, entry 20). Pale yellow solid (mp 168-169 °C).  $^1\text{H}$  NMR (400 MHz,  $\text{CDCl}_3$ )  $\delta$  7.51 (d,  $J = 8.4$  Hz, 2H), 7.44 (dd,  $J = 7.6$  Hz,  $J = 1.6$  Hz, 1H), 7.38 – 7.32 (m, 4H), 7.32 – 7.26 (m, 2H), 7.23 – 7.20 (m, 2H), 7.17 – 7.12 (m, 3H), 7.11 – 7.00 (m, 6H), 6.87 (d,  $J = 7.2$  Hz, 2H), 5.13 (d,  $J = 5.6$  Hz, 1H), 4.97 (d,  $J = 5.6$  Hz, 1H), 4.76 – 4.65 (m, 1H), 3.96 (ddd,  $J = 15.6$  Hz,  $J = 5.6$  Hz,  $J = 3.2$  Hz, 1H), 3.60 – 3.49 (m, 1H), 3.19 (ddd,  $J = 14.4$  Hz,  $J = 5.6$  Hz,  $J = 3.2$  Hz, 1H), 2.26 (s, 3H);  $^{13}\text{C}$  NMR (100 MHz,  $\text{CDCl}_3$ )  $\delta$  173.5, 144.0, 141.1, 140.3, 139.8, 138.5, 137.1, 135.9, 135.8, 132.0, 130.1, 130.0, 129.9, 129.0, 128.7, 128.6, 127.9, 127.3, 127.1, 126.8, 126.6, 126.1, 55.4, 54.4, 45.4, 35.7, 21.4; IR (neat): 2925, 1639(s), 1484, 1349, 1170, 1120, 1088, 763, 701, 567; HRESIMS Calcd for  $[\text{C}_{36}\text{H}_{31}\text{NNaO}_3\text{S}]^+$  ( $\text{M} + \text{Na}^+$ ) 580.1917, found 580.1916.

### 8-chloro-5,6-diphenyl-3-tosyl-2,3,5,6-tetrahydrobenzo[*d*]azocin-4(1*H*)-one (2u)

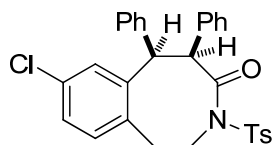

**2u**

Compound **2u** was prepared in 98% yield (101.1 mg) according to the general procedure (Table 2, entry 21). Pale yellow solid (mp 181-182 °C).  $^1\text{H}$  NMR (500 MHz,  $\text{CDCl}_3$ )  $\delta$



7.50 (d,  $J = 8.5$  Hz, 2H), 7.19 – 7.07 (m, 10H), 7.06 – 6.99 (m, 2H), 6.83 (d,  $J = 7.5$  Hz, 2H), 6.74 (s, 1H), 5.06 (d,  $J = 6.0$  Hz, 1H), 4.83 (d,  $J = 5.5$  Hz, 1H), 4.71 – 4.58 (m, 1H), 3.97 – 3.83 (m, 1H), 3.54 – 3.41 (m, 1H), 3.17 – 3.06 (m, 1H), 2.39 (s, 3H);  $^{13}\text{C}$  NMR (125 MHz,  $\text{CDCl}_3$ )  $\delta$  173.0, 144.3, 142.5, 137.8, 136.6, 135.6, 135.0, 132.9, 132.6, 131.0, 130.0, 129.7, 129.0, 128.6, 128.0, 127.8, 127.5, 127.1, 126.8, 54.6, 53.9, 45.1, 35.1, 21.5; IR (neat): 2926, 1700(s), 1596, 1496, 1349, 1166, 1087, 736, 700, 536; HRESIMS Calcd for  $[\text{C}_{30}\text{H}_{26}\text{ClNNaO}_3\text{S}]^+$  ( $\text{M} + \text{Na}^+$ ) 538.1214, found 538.1213.

**8-bromo-5,6-diphenyl-3-tosyl-2,3,5,6-tetrahydrobenzo[*d*]azocin-4(1*H*)-one (2v)**

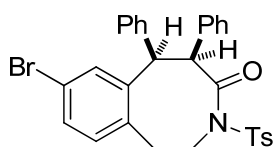

**2v**

Compound **2v** was prepared in 95% yield (106.5 mg) according to the general procedure (Table 2, entry 22). Pale yellow solid (mp 205-206 °C).  $^1\text{H}$  NMR (400 MHz,  $\text{CDCl}_3$ )  $\delta$  7.51 (d,  $J = 8.4$  Hz, 2H), 7.31 (dd,  $J = 8.0$  Hz,  $J = 2.0$  Hz, 1H), 7.19 – 7.02 (m, 11H), 6.90 (d,  $J = 1.6$  Hz, 1H), 6.83 (d,  $J = 7.2$  Hz, 2H), 5.06 (d,  $J = 6.0$  Hz, 1H), 4.85 (d,  $J = 6.0$  Hz, 1H), 4.71 – 4.59 (m, 1H), 3.92 (ddd,  $J = 15.6$  Hz,  $J = 6.0$  Hz,  $J = 3.2$  Hz, 1H), 3.53 – 3.40 (m, 1H), 3.11 (ddd,  $J = 14.4$  Hz,  $J = 6.4$  Hz,  $J = 3.2$  Hz, 1H), 2.42 (s, 3H);  $^{13}\text{C}$  NMR (100 MHz,  $\text{CDCl}_3$ )  $\delta$  173.1, 144.3, 142.9, 137.8, 136.6, 135.7, 135.6, 133.9, 132.9, 130.6, 129.9, 129.7, 129.1, 128.7, 128.0, 127.9, 127.2, 126.9, 121.2, 54.8, 53.9, 45.1, 35.3, 21.6; IR (neat): 2922, 1642(s), 1495, 1454, 1347, 1165, 1119, 732, 699, 565; HRESIMS Calcd for  $[\text{C}_{30}\text{H}_{26}\text{BrNNaO}_3\text{S}]^+$  ( $\text{M} + \text{Na}^+$ ) 582.0709, found 582.0709.

**9-methyl-5,6-diphenyl-3-tosyl-2,3,5,6-tetrahydrobenzo[*d*]azocin-4(1*H*)-one (2w)**

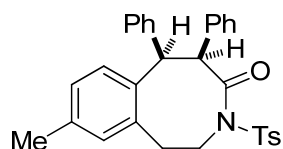

**2w**

Compound **2w** was prepared in 91% yield (90.2 mg) according to the general procedure (Table 2, entry 23). Pale yellow solid (mp 175-176 °C).  $^1\text{H}$  NMR (400 MHz,  $\text{CDCl}_3$ )  $\delta$

7.49 (d,  $J = 8.4$  Hz, 2H), 7.21 – 7.16 (m, 2H), 7.16 – 7.09 (m, 5H), 7.08 – 7.04 (m, 1H), 7.03 – 6.97 (m, 3H), 6.91 – 6.85 (m, 3H), 6.71 (d,  $J = 8.0$  Hz, 1H), 5.05 (d,  $J = 5.2$  Hz, 1H), 4.90 (d,  $J = 5.2$  Hz, 1H), 4.68 – 4.56 (m, 1H), 3.92 (ddd,  $J = 15.6$  Hz,  $J = 5.6$  Hz,  $J = 4.0$  Hz, 1H), 3.50 – 3.39 (m, 1H), 3.09 (ddd,  $J = 14.8$  Hz,  $J = 5.6$  Hz,  $J = 4.0$  Hz, 1H), 2.38 (s, 3H), 2.32 (s, 3H);  $^{13}\text{C}$  NMR (100 MHz,  $\text{CDCl}_3$ )  $\delta$  173.6, 143.9, 139.1, 137.7, 137.3, 137.2, 136.8, 136.0, 132.2, 131.3, 129.8, 129.7, 129.0, 128.5, 127.9, 127.8, 127.7, 127.0, 126.4, 55.9, 53.7, 45.5, 36.0, 21.5, 20.8; IR (neat): 2923, 1700(s), 1496, 1454, 1347, 1165, 1120, 1087, 701, 552; HRESIMS Calcd for  $[\text{C}_{31}\text{H}_{29}\text{NNaO}_3\text{S}]^+$  ( $\text{M} + \text{Na}^+$ ) 518.1760, found 518.1761.

**9-methoxy-5,6-diphenyl-3-tosyl-2,3,5,6-tetrahydrobenzo[*d*]azocin-4(1*H*)-one (2x)**

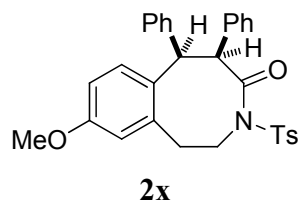

Compound **2x** was prepared in 89% yield (91.0 mg) according to the general procedure (Table 2, entry 24). Pale yellow solid (mp 188-189 °C).  $^1\text{H}$  NMR (400 MHz,  $\text{CDCl}_3$ )  $\delta$  7.54 (d,  $J = 8.4$  Hz, 2H), 7.22 – 7.17 (m, 2H), 7.16 – 7.10 (m, 5H), 7.10 – 6.98 (m, 3H), 6.92 (d,  $J = 7.2$  Hz, 2H), 6.76 – 6.70 (m, 2H), 6.58 (dd,  $J = 8.4$  Hz,  $J = 2.8$  Hz, 1H), 5.05 (d,  $J = 5.6$  Hz, 1H), 4.90 (d,  $J = 5.2$  Hz, 1H), 4.66 – 4.54 (m, 1H), 3.94 (ddd,  $J = 15.6$  Hz,  $J = 5.6$  Hz,  $J = 3.6$  Hz, 1H), 3.78 (s, 3H), 3.50 – 3.39 (m, 1H), 3.08 (ddd,  $J = 14.8$  Hz,  $J = 5.6$  Hz,  $J = 4.0$  Hz, 1H), 2.39 (s, 3H);  $^{13}\text{C}$  NMR (100 MHz,  $\text{CDCl}_3$ )  $\delta$  173.7, 158.7, 144.0, 139.3, 138.3, 137.3, 136.0, 132.8, 132.4, 129.8, 129.7, 129.0, 128.5, 127.9, 127.0, 126.4, 117.1, 111.6, 56.0, 55.2, 53.1, 45.6, 36.1, 21.5; IR (neat): 2925, 1699(s), 1496, 1455, 1349, 1243, 1166, 1087, 701, 559; HRESIMS Calcd for  $[\text{C}_{31}\text{H}_{29}\text{NNaO}_4\text{S}]^+$  ( $\text{M} + \text{Na}^+$ ) 534.1710, found 534.1708.

**9-chloro-5,6-diphenyl-3-tosyl-2,3,5,6-tetrahydrobenzo[*d*]azocin-4(1*H*)-one (2y)**

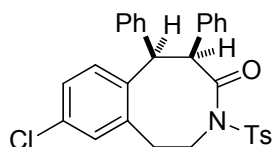

## 2y

Compound **2y** was prepared in 89% yield (91.8 mg) according to the general procedure (Table 2, entry 25). Pale yellow solid (mp 195-196 °C). <sup>1</sup>H NMR (400 MHz, CDCl<sub>3</sub>) δ 7.57 (d, *J* = 8.4 Hz, 2H), 7.21 – 7.10 (m, 8H), 7.10 – 7.00 (m, 3H), 6.98 (dd, *J* = 8.4 Hz, *J* = 2.4 Hz, 1H), 6.91 (d, *J* = 7.6 Hz, 2H), 6.70 (d, *J* = 8.4 Hz, 1H), 5.06 (d, *J* = 6.0 Hz, 1H), 4.90 (d, *J* = 6.0 Hz, 1H), 4.67 – 4.55 (m, 1H), 3.95 (ddd, *J* = 15.6 Hz, *J* = 6.0 Hz, *J* = 3.6 Hz, 1H), 3.52 – 3.39 (m, 1H), 3.08 (ddd, *J* = 14.8 Hz, *J* = 6.0 Hz, *J* = 3.6 Hz, 1H), 2.39 (s, 3H); <sup>13</sup>C NMR (100 MHz, CDCl<sub>3</sub>) δ 173.2, 144.3, 139.3, 138.5, 138.3, 136.7, 135.6, 133.0, 132.4, 131.0, 129.9, 129.6, 129.1, 128.5, 128.0, 127.9, 127.0, 126.9, 126.7, 55.2, 53.1, 45.3, 35.4, 21.6; IR (neat): 2921, 1638(s), 1452, 1344, 1163, 1111, 1083, 698, 547; HRESIMS Calcd for [C<sub>30</sub>H<sub>26</sub>ClNNaO<sub>3</sub>S]<sup>+</sup> (M + Na<sup>+</sup>) 538.1214, found 538.1214.

## 8,9-dimethyl-5,6-diphenyl-3-tosyl-2,3,5,6-tetrahydrobenzo[*d*]azocin-4(1*H*)-one (2z)

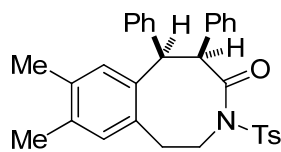

## 2z

Compound **2z** was prepared in 85% yield (86.7 mg) according to the general procedure (Table 2, entry 26). Pale yellow solid (mp 169-170 °C). <sup>1</sup>H NMR (400 MHz, CDCl<sub>3</sub>) δ 7.52 (d, *J* = 8.4 Hz, 2H), 7.23 – 7.15 (m, 5H), 7.11 (d, *J* = 8.4 Hz, 2H), 7.07 (d, *J* = 7.2 Hz, 1H), 7.03 – 6.95 (m, 3H), 6.89 (d, *J* = 7.6 Hz, 2H), 6.61 (s, 1H), 5.01 (d, *J* = 5.2 Hz, 1H), 4.88 (d, *J* = 4.8 Hz, 1H), 4.64 (ddd, *J* = 15.2 Hz, *J* = 9.6 Hz, *J* = 5.2 Hz, 1H), 3.93 – 3.82 (m, 1H), 3.38 (ddd, *J* = 14.8 Hz, *J* = 9.6 Hz, *J* = 5.2 Hz, 1H), 3.09 – 2.99 (m, 1H), 2.40 (s, 3H), 2.24 (s, 3H), 2.09 (s, 3H); <sup>13</sup>C NMR (100 MHz, CDCl<sub>3</sub>) δ 173.8, 143.9, 139.0, 138.2, 137.8, 136.0, 135.7, 135.1, 134.5, 132.9, 132.7, 129.8, 129.6, 128.9, 128.7, 127.9, 127.8, 127.1, 126.3, 56.3, 53.9, 45.9, 35.8, 21.6, 19.3, 19.1; IR (neat): 2923, 1638(s), 1496, 1453, 1347, 1166, 1114, 1087, 701, 673, 545; HRESIMS Calcd for [C<sub>32</sub>H<sub>31</sub>NNaO<sub>3</sub>S]<sup>+</sup> (M + Na<sup>+</sup>) 532.1917, found 532.1916.

## 9,10-diphenyl-7-tosyl-6,7,9,10-tetrahydro-[1,3]dioxolo[4',5':4,5]benzo[1,2-*d*]azocin-8(5*H*)-one (2aa)

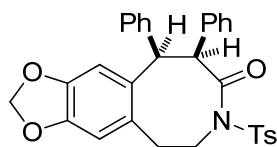

**2aa**

Compound **2aa** was prepared in 73% yield (76.7 mg) according to the general procedure except by using 10 mol % of  $\text{Zn}(\text{OTf})_2$  as catalyst and 5 Å MS (60 mg/0.1 mmol) as additive (Table 2, entry 27). Pale yellow solid (mp 201-202 °C).  $^1\text{H}$  NMR (400 MHz,  $\text{CDCl}_3$ )  $\delta$  7.64 (d,  $J = 8.4$  Hz, 2H), 7.23 – 7.12 (m, 7H), 7.10 – 7.03 (m, 3H), 7.01 – 6.96 (m, 2H), 6.62 (s, 1H), 6.29 (s, 1H), 5.91 (d,  $J = 1.6$  Hz, 1H), 5.86 (d,  $J = 1.6$  Hz, 1H), 5.08 (d,  $J = 6.4$  Hz, 1H), 4.93 (d,  $J = 6.0$  Hz, 1H), 4.57 – 4.45 (m, 1H), 3.94 (ddd,  $J = 15.6$  Hz,  $J = 6.0$  Hz,  $J = 3.6$  Hz, 1H), 3.48 – 3.36 (m, 1H), 3.03 (ddd,  $J = 14.8$  Hz,  $J = 6.0$  Hz,  $J = 3.6$  Hz, 1H), 2.40 (s, 3H);  $^{13}\text{C}$  NMR (100 MHz,  $\text{CDCl}_3$ )  $\delta$  173.9, 146.5, 146.4, 144.1, 139.1, 136.8, 136.0, 134.3, 130.0, 129.9, 129.8, 129.0, 128.6, 128.0, 127.9, 127.0, 126.6, 111.5, 111.1, 101.1, 56.2, 52.9, 46.0, 35.6, 21.6; IR (neat): 2922, 1702(s), 1485, 1455, 1346, 1166, 1112, 1039, 732, 672, 564; HRESIMS Calcd for  $[\text{C}_{31}\text{H}_{27}\text{NNaO}_5\text{S}]^+$  (M +  $\text{Na}^+$ ) 548.1502, found 548.1501.

**5,6-diphenyl-3-tosyl-2,3,5,6-tetrahydronaphtho[2,3-*d*]azocin-4(1*H*)-one (2ab)**

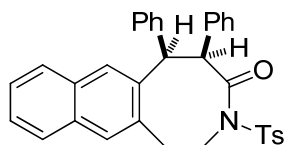

**2ab**

Compound **2ab** was prepared in 85% yield (90.3 mg) according to the general procedure (Table 2, entry 28). Pale yellow solid (mp 179-180 °C).  $^1\text{H}$  NMR (400 MHz,  $\text{CDCl}_3$ )  $\delta$  7.49 (d,  $J = 8.4$  Hz, 2H), 7.35 – 7.06 (m, 13H), 7.06 – 6.98 (m, 2H), 6.92 – 6.81 (m, 3H), 5.06 (d,  $J = 5.2$  Hz, 1H), 4.94 (d,  $J = 5.2$  Hz, 1H), 4.72 – 4.60 (m, 1H), 3.94 (ddd,  $J = 15.6$  Hz,  $J = 5.6$  Hz,  $J = 4.4$  Hz, 1H), 3.56 – 3.43 (m, 1H), 3.16 (ddd,  $J = 14.8$  Hz,  $J = 5.6$  Hz,  $J = 4.0$  Hz, 1H), 2.40 (s, 3H);  $^{13}\text{C}$  NMR (100 MHz,  $\text{CDCl}_3$ )  $\delta$  173.6, 144.0, 140.8, 138.9, 137.3, 137.1, 136.1, 131.5, 131.4, 129.9, 129.8, 129.1, 128.6, 127.9(2), 127.9(0), 127.7, 127.2, 127.1, 126.5, 55.8, 54.2, 45.5, 36.2, 21.6; IR (neat): 2924, 2853, 1698(s),

1454, 1346, 1165, 1119, 911, 733, 700, 543; HRESIMS Calcd for  $[C_{34}H_{30}NNaO_3S]^{2+}$  ( $M + H^+ + Na^+$ ) 555.1833, found 555.2675.

**6-methyl-5-phenyl-3-tosyl-2,3,5,6-tetrahydrobenzo[d]azocin-4(1H)-one (2ac)**

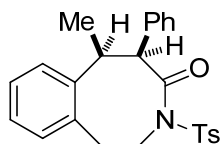

**2ac**

Compound **2ac** was prepared in 81% yield (67.9 mg) according to the general procedure except at 100 °C for 60 h (Table 2, entry 29). Pale yellow solid (mp 167-168 °C).  $^1H$  NMR (400 MHz,  $CDCl_3$ )  $\delta$  7.72 (d,  $J = 8.4$  Hz, 2H), 7.31 – 7.25 (m, 3H), 7.22 – 7.08 (m, 6H), 7.08 – 7.01 (m, 2H), 4.57 – 4.43 (m, 1H), 4.39 (d,  $J = 6.8$  Hz, 1H), 4.21 – 4.08 (m, 1H), 4.07 – 3.95 (m, 1H), 3.36 (dt,  $J = 15.2$  Hz,  $J = 4.8$  Hz, 1H), 3.27 – 3.13 (m, 1H), 2.35 (s, 3H), 1.03 (d,  $J = 7.2$  Hz, 3H);  $^{13}C$  NMR (100 MHz,  $CDCl_3$ )  $\delta$  173.5, 144.2, 141.2, 136.3, 136.2, 136.1, 131.9, 130.7, 129.2, 128.5, 127.6, 127.5, 127.3, 127.2, 58.8, 46.0, 38.6, 36.2, 21.5, 18.0; IR (neat): 2928, 2853, 1641(s), 1457, 1354, 1170, 1113, 739, 584; HRESIMS Calcd for  $[C_{25}H_{25}NNaO_3S]^+$  ( $M + Na^+$ ) 442.1447, found 442.1449.

**6-ethyl-5-phenyl-3-tosyl-2,3,5,6-tetrahydrobenzo[d]azocin-4(1H)-one (2ad)**

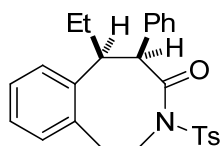

**2ad**

Compound **2ad** was prepared in 63% yield (54.6 mg) according to the general procedure except at 100 °C for 60 h (Table 2, entry 30). Pale yellow solid (mp 160-161 °C).  $^1H$  NMR (400 MHz,  $CDCl_3$ )  $\delta$  7.73 (d,  $J = 6.8$  Hz, 2H), 7.30 – 7.25 (m, 3H), 7.23 – 7.16 (m, 3H), 7.15 – 7.04 (m, 4H), 6.99 (d,  $J = 7.6$  Hz, 1H), 4.67 – 4.25 (m, 2H), 4.22 – 4.04 (m, 1H), 3.91 – 3.47 (m, 1H), 3.41 – 3.28 (m, 1H), 3.26 – 3.06 (m, 1H), 2.36 (s, 3H), 1.67 – 1.34 (m, 2H), 0.71 (t,  $J = 6.8$  Hz, 3H);  $^{13}C$  NMR (100 MHz,  $CDCl_3$ )  $\delta$  173.9, 144.2, 139.2, 137.0, 136.3, 132.0, 130.9, 129.2, 128.5, 127.6, 127.3, 127.2, 127.1, 58.8, 46.3, 36.3, 24.9,

21.5, 12.5; IR (neat): 2967, 2925, 1639(s), 1454, 1347, 1167, 1118, 706, 669, 549; HRESIMS Calcd for  $[C_{26}H_{27}NNaO_3S]^+$  ( $M + Na^+$ ) 456.1604, found 456.1606.

**5-methyl-6-phenyl-3-tosyl-2,3,5,6-tetrahydrobenzo[d]azocin-4(1H)-one (2ae)**

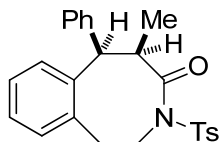

**2ae**

Compound **2ae** was prepared in 35% yield (29.4 mg) according to the general procedure except at 100 °C for 4 h (Table 2, entry 31). Pale yellow oil.  $^1H$  NMR (400 MHz,  $CDCl_3$ )  $\delta$  7.38 (d,  $J = 8.0$  Hz, 2H), 7.25 – 7.17 (m, 5H), 7.14 – 7.05 (m, 3H), 7.04 – 6.95 (m, 2H), 6.72 (d,  $J = 8.0$  Hz, 1H), 4.66 (d,  $J = 6.4$  Hz, 1H), 4.48 (ddd,  $J = 16.0$  Hz,  $J = 9.6$  Hz,  $J = 6.4$  Hz, 1H), 4.00 – 3.91 (m, 1H), 3.85 (ddd,  $J = 15.2$  Hz,  $J = 6.4$  Hz,  $J = 3.2$  Hz, 1H), 3.44 (ddd,  $J = 16.4$  Hz,  $J = 10.0$  Hz,  $J = 6.4$  Hz, 1H), 3.10 (ddd,  $J = 14.4$  Hz,  $J = 6.8$  Hz,  $J = 3.2$  Hz, 1H), 2.37 (s, 3H), 1.04 (d,  $J = 6.8$  Hz, 3H);  $^{13}C$  NMR (100 MHz,  $CDCl_3$ )  $\delta$  176.8, 143.9, 140.3, 139.0, 136.7, 136.1, 131.1, 130.6, 129.7, 129.1, 128.3, 128.1, 127.5, 126.9, 126.6, 51.3, 45.3, 44.3, 35.5, 21.5, 15.2; IR (neat): 2925, 1633(s), 1494, 1454, 1336, 1164, 1124, 1088, 746, 670, 544; HRESIMS Calcd for  $[C_{25}H_{25}NNaO_3S]^+$  ( $M + Na^+$ ) 442.1447, found 442.1448.

**5-phenyl-6-(1-phenylvinyl)-3-tosyl-2,3,5,6-tetrahydrobenzo[d]azocin-4(1H)-one (2af)**

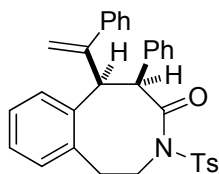

**2af**

Compound **2af** was prepared in 76% yield (77.2 mg) according to the general procedure (Eq. 1, entry 1). Pale yellow solid (mp 181-182 °C).  $^1H$  NMR (400 MHz,  $CDCl_3$ )  $\delta$  7.69 (d,  $J = 8.4$  Hz, 2H), 7.29 – 7.26 (m, 1H), 7.23 – 7.06 (m, 13H), 7.00 (dd,  $J = 7.6$  Hz,  $J = 1.6$  Hz, 2H), 5.32 (s, 1H), 5.25 – 5.20 (m, 2H), 5.07 (d,  $J = 5.2$  Hz, 1H), 4.15 – 4.04 (m, 1H), 4.02 – 3.92 (m, 1H), 3.41 (ddd,  $J = 14.8$  Hz,  $J = 9.2$  Hz,  $J = 4.8$  Hz, 1H), 3.13 – 3.05 (m, 1H), 2.38 (s, 3H);  $^{13}C$  NMR (125 MHz,  $CDCl_3$ )  $\delta$  175.8, 147.4, 144.3, 143.0, 137.9,

137.6, 135.9, 131.3, 131.2, 130.6, 129.4, 128.3, 128.1, 127.7, 127.6, 127.3, 127.2, 126.7, 126.6, 118.2, 58.6, 49.4, 47.0, 36.3, 21.5; IR (neat): 2950, 2844, 1613(s), 1594, 1495, 1366, 1187, 1167, 1024, 833, 572, 531; HRESIMS Calcd for  $[C_{32}H_{29}NNaO_3S]^+$  ( $M + Na^+$ ) 530.1760, found 530.1761.

**Methyl-2-(4-oxo-5-phenyl-3-tosyl-1,2,3,4,5,6-hexahydrobenzo[d]azocin-6-yl)acrylate (2ag)**

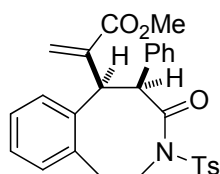

**2ag**

Compound **2ag** was prepared in 66% yield (64.6 mg) according to the general procedure (Eq. 1, entry 2). Pale yellow solid (mp 179-180 °C).  $^1H$  NMR (500 MHz,  $CDCl_3$ )  $\delta$  7.64 (d,  $J = 8.0$  Hz, 2H), 7.30 – 7.20 (m, 6H), 7.18 – 7.10 (m, 5H), 6.11 (s, 1H), 5.58 (s, 1H), 5.28 (d,  $J = 7.5$  Hz, 1H), 4.96 (d,  $J = 7.5$  Hz, 1H), 4.46 – 4.36 (m, 1H), 4.25 – 4.15 (m, 1H), 3.60 (s, 3H), 3.53 – 3.44 (m, 1H), 3.22 – 3.13 (m, 1H), 2.35 (s, 3H);  $^{13}C$  NMR (125 MHz,  $CDCl_3$ )  $\delta$  173.4, 167.8, 144.1, 138.9, 137.1, 136.6, 136.1, 135.6, 132.1, 130.8, 129.5, 129.2, 128.3, 127.8, 127.7, 127.4, 126.9(3), 126.9(0), 56.5, 52.0, 46.0, 43.9, 35.7, 21.5; IR (neat): 2951, 2923, 1713(s), 1448, 1367, 1273, 1151, 1074, 755, 686, 565; HRESIMS Calcd for  $[C_{28}H_{27}NNaO_5S]^+$  ( $M + Na^+$ ) 512.1502, found 512.1502.

**5-phenyl-3-tosyl-6-vinyl-2,3,5,6-tetrahydrobenzo[d]azocin-4(1H)-one (2ah)**

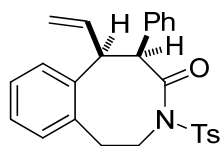

**2ah**

Compound **2ah** was prepared in 61% yield (52.6 mg) according to the general procedure (Eq. 1, entry 3). Pale yellow oil.  $^1H$  NMR (400 MHz,  $CDCl_3$ )  $\delta$  7.79 (d,  $J = 8.4$  Hz, 2H), 7.31 – 7.12 (m, 10H), 7.05 – 7.00 (m, 1H), 5.88 (ddd,  $J = 17.2$  Hz,  $J = 10.4$  Hz,  $J = 6.8$  Hz, 1H), 4.95 (d,  $J = 10.0$  Hz, 1H), 4.91 (d,  $J = 17.2$  Hz, 1H), 4.71 – 4.59 (m, 1H), 4.42 (d,  $J = 4.8$  Hz, 1H), 4.25 (t,  $J = 5.6$  Hz, 1H), 4.06 – 3.96 (m, 1H), 3.30 (t,  $J = 5.2$  Hz, 2H),

2.38 (s, 3H);  $^{13}\text{C}$  NMR (100 MHz,  $\text{CDCl}_3$ )  $\delta$  172.7, 144.3, 140.4, 138.1, 137.0, 136.2, 136.0, 132.1, 130.1, 129.8, 129.1, 128.8, 128.7, 128.1, 127.5, 127.4, 117.4, 57.5, 53.0, 46.0, 36.7, 21.5; IR (neat): 2920, 1693(s), 1453, 1351, 1166, 1116, 756, 738, 701, 550; HRESIMS Calcd for  $[\text{C}_{26}\text{H}_{25}\text{NNaO}_3\text{S}]^+$  ( $\text{M} + \text{Na}^+$ ) 454.1447, found 454.1447.

### 1,2-diphenyl-4-tosyl-1,2,4,5,6,7-hexahydro-3*H*-benzo[*e*]azonin-3-one (2ai)

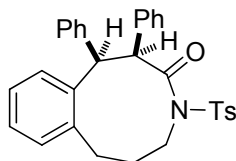

**2ai**

Compound **2ai** was prepared in 46% yield (45.6 mg) according to the general procedure except by using 10 mol % of  $\text{Zn}(\text{OTf})_2$  as catalyst and 5 Å MS (60 mg/0.1 mmol) as additive (Eq. 2). Pale yellow solid (mp 174-175 °C).  $^1\text{H}$  NMR (400 MHz,  $\text{CDCl}_3$ )  $\delta$  7.66 (d,  $J = 8.0$  Hz, 2H), 7.40 – 7.26 (m, 2H), 7.23 – 7.15 (m, 3H), 7.15 – 7.00 (m, 9H), 6.95 – 6.82 (m, 1H), 6.80 – 6.56 (m, 1H), 5.90 – 5.26 (m, 1H), 5.24 – 4.92 (m, 1H), 4.50 – 4.05 (m, 1H), 4.03 – 3.65 (m, 1H), 3.35 – 3.06 (m, 1H), 3.05 – 2.68 (m, 1H), 2.39 (s, 3H), 2.38 – 2.17 (m, 2H);  $^{13}\text{C}$  NMR (100 MHz,  $\text{CDCl}_3$ )  $\delta$  172.9, 144.0, 139.9, 139.1, 136.2, 130.8, 130.5, 129.2, 129.0, 128.4, 128.0, 127.8, 127.5, 126.7, 126.3, 126.0, 52.5, 46.5, 33.0, 30.1, 21.5; IR (neat): 2924, 1698(s), 1495, 1448, 1349, 1167, 1119, 1086, 738, 699, 597; HRESIMS Calcd for  $[\text{C}_{31}\text{H}_{29}\text{NNaO}_3\text{S}]^+$  ( $\text{M} + \text{Na}^+$ ) 518.1760, found 518.1759.

### 5,6-diphenyl-3,11-ditosyl-1,2,3,5,6,11-hexahydro-4*H*-azocino[4,5-*b*]indol-4-one (2aj)

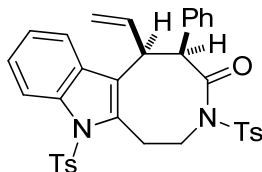

**2aj**

Compound **2aj** was prepared in 55% yield (68.7 mg) according to the general procedure except by using 20 mol % of  $\text{HNTf}_2$  as catalyst and 5 Å MS (60 mg/0.1 mmol) as additive (Eq. 3, entry 1). Yellow solid (mp 174-175 °C).  $^1\text{H}$  NMR (500 MHz,  $\text{CDCl}_3$ )  $\delta$  8.13 (d,  $J = 8.5$  Hz, 1H), 7.61 (d,  $J = 8.0$  Hz, 2H), 7.57 (d,  $J = 8.5$  Hz, 2H), 7.47 (d,  $J =$



7.5 Hz, 2H), 7.39 – 7.34 (m, 2H), 7.33 – 7.27 (m, 2H), 7.26 – 7.24 (m, 1H), 7.23 – 7.17 (m, 3H), 7.01 (d,  $J = 8.0$  Hz, 2H), 6.11 (ddd,  $J = 17.0$  Hz,  $J = 10.5$  Hz,  $J = 5.5$  Hz, 1H), 4.97 – 4.90 (m, 1H), 4.62 – 4.51 (m, 2H), 4.32 – 4.21 (m, 2H), 3.93 (ddd,  $J = 14.5$  Hz,  $J = 10.5$  Hz,  $J = 3.5$  Hz, 1H), 3.76 – 3.68 (m, 1H), 3.06 (ddd,  $J = 16.5$  Hz,  $J = 10.5$  Hz,  $J = 4.0$  Hz, 1H), 2.35 (s, 3H), 2.27 (s, 3H);  $^{13}\text{C}$  NMR (125 MHz,  $\text{CDCl}_3$ )  $\delta$  175.0, 145.1, 144.2, 137.3, 136.3, 136.2, 135.6, 134.1, 133.0, 130.0, 129.4, 128.8, 128.6, 127.6, 126.1, 124.7, 123.4, 122.5, 117.4, 117.3, 115.2, 58.8, 45.2, 44.0, 26.6, 21.6, 21.5; IR (neat): 2925, 1639(s), 1494, 1452, 1357, 1222, 1172, 1088, 671, 547; HRESIMS Calcd for  $[\text{C}_{35}\text{H}_{32}\text{N}_2\text{NaO}_5\text{S}_2]^+$  ( $\text{M} + \text{Na}^+$ ) 647.1645, found 647.1646.

***tert*-butyl-4-oxo-5,6-diphenyl-3-tosyl-1,2,3,4,5,6-hexahydro-11*H*-azocino[4,5-*b*]indole-11-carboxylate (**2ak**)**

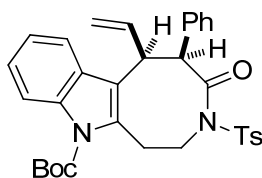

**2ak**

Compound **2ak** was prepared in 41% yield (46.8 mg) according to the general procedure except by using 20 mol % of  $\text{HNTf}_2$  as catalyst and 5 Å MS (60 mg/0.1 mmol) as additive (Eq. 3, entry 2). Pale yellow solid (mp 170-171 °C).  $^1\text{H}$  NMR (500 MHz,  $\text{CDCl}_3$ )  $\delta$  7.90 (d,  $J = 8.5$  Hz, 1H), 7.58 (d,  $J = 7.5$  Hz, 2H), 7.47 (d,  $J = 8.0$  Hz, 2H), 7.42 – 7.36 (m, 2H), 7.36 – 7.31 (m, 2H), 7.25 – 7.22 (m, 1H), 7.22 – 7.16 (m, 1H), 6.84 (d,  $J = 8.0$  Hz, 2H), 6.22 (ddd,  $J = 17.0$  Hz,  $J = 10.5$  Hz,  $J = 5.5$  Hz, 1H), 5.06 – 4.99 (m, 1H), 4.87 – 4.79 (m, 1H), 4.73 (d,  $J = 4.5$  Hz, 1H), 4.41 – 4.34 (m, 1H), 4.29 – 4.21 (m, 1H), 3.92 (ddd,  $J = 15.0$  Hz,  $J = 11.0$  Hz,  $J = 4.0$  Hz, 1H), 3.66 – 3.56 (m, 1H), 3.11 (ddd,  $J = 15.5$  Hz,  $J = 11.0$  Hz,  $J = 4.5$  Hz, 1H), 2.21 (s, 3H), 1.73 (s, 9H);  $^{13}\text{C}$  NMR (125 MHz,  $\text{CDCl}_3$ )  $\delta$  175.9, 150.2, 143.9, 137.1, 135.6, 135.3, 134.0, 133.2, 129.1, 128.9, 128.8, 128.5, 127.5, 127.2, 124.1, 122.6, 120.5, 117.5, 116.9, 115.4, 84.5, 59.0, 44.9, 44.0, 28.3, 26.8, 21.6; IR (neat): 2925, 1639(s), 1494, 1454, 1349, 1255, 1140, 1035, 671, 591; HRESIMS Calcd for  $[\text{C}_{33}\text{H}_{34}\text{N}_2\text{NaO}_5\text{S}]^+$  ( $\text{M} + \text{Na}^+$ ) 593.2081, found 593.2096.

**5-phenyl-3-tosyl-6-vinyl-2,3,5,6-tetrahydrobenzo[4,5]thieno[3,2-*d*]azocin-4(1*H*)-one (2al)**

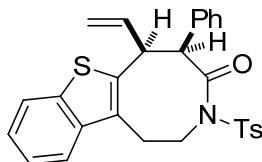

**2al**

Compound **2al** was prepared in 53% yield (51.7 mg) according to the general procedure except by using 20 mol % of HNTf<sub>2</sub> as catalyst and 5 Å MS (60 mg/0.1 mmol) as additive (Eq. 3, entry 3). Pale yellow solid (mp 161-162 °C). <sup>1</sup>H NMR (400 MHz, CDCl<sub>3</sub>) δ 7.75 – 7.64 (m, 2H), 7.49 – 7.38 (m, 5H), 7.37 – 7.27 (m, 4H), 6.90 (d, *J* = 8.4 Hz, 2H), 5.93 (ddd, *J* = 18.0 Hz, *J* = 10.0 Hz, *J* = 8.0 Hz, 1H), 5.07 (d, *J* = 10.4 Hz, 1H), 4.96 (d, *J* = 16.8 Hz, 1H), 4.88 (d, *J* = 5.2 Hz, 1H), 4.73 – 4.61 (m, 1H), 4.29 (dd, *J* = 8.0 Hz, *J* = 5.2 Hz, 1H), 4.08 – 3.99 (m, 1H), 3.53 – 3.36 (m, 2H), 2.29 (s, 3H); <sup>13</sup>C NMR (100 MHz, CDCl<sub>3</sub>) δ 172.8, 144.0, 141.1, 140.6, 138.5, 136.3, 135.5, 134.3, 129.7, 128.9, 128.3, 128.2, 127.6, 127.4, 124.4, 124.2, 122.2, 120.9, 119.2, 56.0, 49.4, 44.7, 26.9, 21.5; IR (neat): 2924, 1634(s), 1455, 1348, 1166, 1110, 1087, 733, 671, 544; HRESIMS Calcd for [C<sub>28</sub>H<sub>25</sub>NNaO<sub>3</sub>S<sub>2</sub>]<sup>+</sup> (M + Na<sup>+</sup>) 510.1168, found 510.1173.

**4,5-diphenyl-7-tosyl-4,7,8,9-tetrahydrothieno[2,3-*d*]azocin-6(5*H*)-one (2am)**

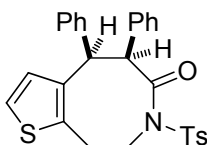

**2am**

Compound **2am** was prepared in 51% yield (49.8 mg) according to the general procedure except by using 20 mol % of HNTf<sub>2</sub> as catalyst and 5 Å MS (60 mg/0.1 mmol) as additive (Eq. 3, entry 4). Pale yellow solid (mp 162-163 °C). <sup>1</sup>H NMR (500 MHz, CDCl<sub>3</sub>) δ 7.58 (d, *J* = 8.5 Hz, 2H), 7.20 (d, *J* = 8.0 Hz, 2H), 7.19 – 7.15 (m, 1H), 7.15 – 7.10 (m, 3H), 7.02 (d, *J* = 7.5 Hz, 2H), 7.00 – 6.95 (m, 3H), 6.42 (d, *J* = 7.5 Hz, 2H), 6.39 (d, *J* = 5.5 Hz, 1H), 5.10 (d, *J* = 5.5 Hz, 1H), 4.66 (d, *J* = 5.0 Hz, 1H), 4.65 – 4.58 (m, 1H), 3.94 (ddd, *J* = 15.5 Hz, *J* = 7.0 Hz, *J* = 4.0 Hz, 1H), 3.74 – 3.62 (m, 1H), 3.42 (ddd, *J* = 16.0 Hz, *J* = 7.0 Hz, *J* = 3.5 Hz, 1H), 2.42 (s, 3H); <sup>13</sup>C NMR (125 MHz, CDCl<sub>3</sub>) δ 173.4, 144.2,

138.7, 138.5, 136.0, 135.8, 133.1, 132.2, 130.5, 130.4, 129.2, 128.9, 127.6, 127.3(9), 127.3(6), 127.0, 121.3, 55.0, 52.4, 44.6, 29.5, 21.6; IR (neat): 2923, 1696(s), 1596, 1453, 1345, 1166, 1120, 1087, 732, 701, 540; HRESIMS Calcd for  $[C_{28}H_{25}NNaO_3S_2]^+$  ( $M + Na^+$ ) 510.1168, found 510.1167.

**(E)-3-benzylidene-5-phenyl-2-tosyl-2,3,5,6-tetrahydro-1H-benzo[e][1,3]oxazocine (6ao)**

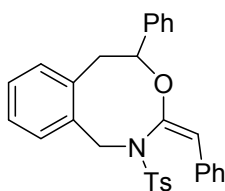

**6ao**

Compound **6ao** was prepared in 92% yield (88.6 mg) according to the general procedure. Yellow oil.  $^1H$  NMR (400 MHz,  $CDCl_3$ )  $\delta$  7.82 (d,  $J = 8.0$  Hz, 2H), 7.53 – 7.47 (m, 1H), 7.34 – 7.28 (m, 7H), 7.19 – 7.14 (m, 4H), 7.10 (d,  $J = 7.2$  Hz, 1H), 7.06 – 7.00 (m, 3H), 5.94 (s, 1H), 4.84 – 4.73 (m, 2H), 4.35 (d,  $J = 11.2$  Hz, 1H), 3.05 (dd,  $J = 14.4$  Hz,  $J = 10.0$  Hz, 1H), 2.82 (d,  $J = 14.0$  Hz, 1H), 2.48 (s, 3H);  $^{13}C$  NMR (100 MHz,  $CDCl_3$ )  $\delta$  145.9, 143.6, 141.1, 138.1, 135.7, 133.8, 133.0, 132.1, 130.4, 129.3, 129.1, 128.5, 128.2, 128.1, 127.8, 127.7, 127.5, 126.9, 125.5, 116.9, 88.1, 49.1, 44.6, 21.6; IR (neat): 2924, 2854, 1495, 1446, 1354, 1161, 1086, 755, 689, 579; HRESIMS Calcd for  $[C_{30}H_{27}NNaO_3S]^+$  ( $M + Na^+$ ) 504.1604, found 504.1609.

**(E)-2-phenyl-N-(5-phenylpent-4-en-1-yl)-N-tosylacetamide (2ap')**

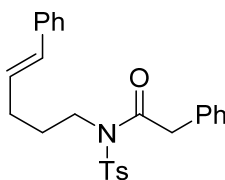

**2ap'**

Compound **2ap'** was prepared in 90% yield (78.0 mg) according to the general procedure. Pale yellow oil.  $^1H$  NMR (400 MHz,  $CDCl_3$ )  $\delta$  7.70 (d,  $J = 8.4$  Hz, 2H), 7.34 – 7.17 (m, 10H), 7.09 – 7.03 (m, 2H), 6.38 (d,  $J = 15.6$  Hz, 1H), 6.16 (dt,  $J = 15.6$  Hz,  $J = 6.8$  Hz,

1H), 3.96 (s, 2H), 3.84 – 3.75 (m, 2H), 2.40 (s, 3H), 2.27 – 2.18 (m, 2H), 1.92 – 1.82 (m, 2H); <sup>13</sup>C NMR (100 MHz, CDCl<sub>3</sub>) δ 170.9, 144.8, 137.4, 136.6, 133.4, 130.8, 129.8, 129.2, 128.9, 128.5, 128.4, 127.5, 127.1, 127.0, 125.9, 46.7, 43.0, 30.1, 29.1, 21.5; IR (neat): 3029, 2955, 1693(s), 1495, 1454, 1354, 1164, 1087, 725, 694, 585; HRESIMS Calcd for [C<sub>26</sub>H<sub>27</sub>NNaO<sub>3</sub>S]<sup>+</sup> (M + Na<sup>+</sup>) 456.1604, found 456.1604.

***N*-(2-(methoxy(phenyl)methyl)phenethyl)-2-phenyl-*N*-tosylacetamide (2aq')**

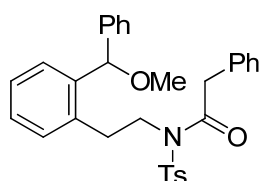

**2aq'**

Compound **2aq'** was prepared in 78% yield (80.2 mg) according to the general procedure. Yellow oil. <sup>1</sup>H NMR (400 MHz, CDCl<sub>3</sub>) δ 7.67 (d, *J* = 8.4 Hz, 2H), 7.41 (d, *J* = 6.4 Hz, 1H), 7.36 – 7.22 (m, 13H), 7.09 – 7.04 (m, 2H), 5.64 (s, 1H), 3.97 – 3.78 (m, 4H), 3.40 (s, 3H), 3.12 – 2.94 (m, 2H), 2.42 (s, 3H); <sup>13</sup>C NMR (100 MHz, CDCl<sub>3</sub>) δ 171.0, 144.9, 141.2, 139.8, 136.6, 136.1, 133.5, 130.7, 129.9, 129.4, 128.5, 128.4, 127.9, 127.7, 127.6, 127.5, 127.1(2), 127.0(9), 81.9, 57.1, 48.3, 42.8, 33.0, 21.6; IR (neat): 2920, 1693(s), 1494, 1453, 1355, 1160, 1087, 725, 698, 577; HRESIMS Calcd for [C<sub>31</sub>H<sub>31</sub>NNaO<sub>4</sub>S]<sup>+</sup> (M + Na<sup>+</sup>) 536.1866, found 536.1866.

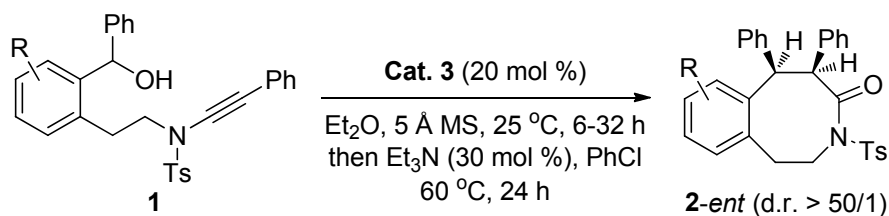

**Supplementary Figure 148.** Synthesis of chiral 3-benzazocinones **2-ent**.

**General procedure for the synthesis of chiral 3-benzazocinones 2-ent:**

To a mixture of the ynamide **1** (0.1 mmol) and 5 Å MS (60 mg) in Et<sub>2</sub>O (2 mL) at room temperature, **Cat. 3** (0.02 mmol, 17.6 mg) was added during stirring. Then, the reaction mixture was stirred at 25 °C and the progress of the reaction was monitored by TLC. After the corresponding reaction time (6-32 h), Et<sub>3</sub>N (0.03 mmol, 4.2 μL) and PhCl (1 mL) was added to the reaction mixture to quench the **Cat. 3**. The resulting reaction solution was stirred at 60 °C for another 24 h. The mixture was concentrated and the residue was purified by chromatography on silica gel (eluent: hexanes/ethyl acetate) to afford the desired chiral 3-benzazocinone **2-ent**.

**(5*S*,6*R*)-8-methyl-5,6-diphenyl-3-tosyl-2,3,5,6-tetrahydrobenzo[*d*]azocin-4(1*H*)-one (2*p-ent*)**

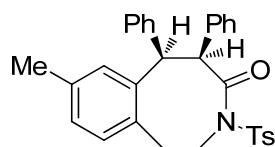

**2*p-ent***

Compound **2*p-ent*** was prepared in 42% yield (20.8 mg) according to the general procedure (Table 4, entry 1).  $[\alpha]_D^{20} = -100.8^\circ$  ( $c = 1.0$ , CHCl<sub>3</sub>). 95:5 e.r. (determined by HPLC: Chiralcel AS-H Column, 20/80 *i*-PrOH/hexane, 1.0 mL/min, 235 nm, 25 °C;  $t_R = 13.41$  min (major), 19.71 min (minor)).

**(5*S*,6*R*)-8-isopropyl-5,6-diphenyl-3-tosyl-2,3,5,6-tetrahydrobenzo[*d*]azocin-4(1*H*)-one (2*r-ent*)**

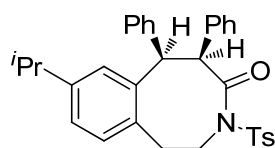

**2*r-ent***

Compound **2*r-ent*** was prepared in 40% yield (21.0 mg) according to the general procedure (Table 4, entry 2).  $[\alpha]_D^{20} = -86.3^\circ$  ( $c = 1.0$ , CHCl<sub>3</sub>). 93.5:6.5 e.r. (determined by HPLC: Chiralcel AS-H Column, 15/85 *i*-PrOH/hexane, 1.2 mL/min, 235 nm, 25 °C;  $t_R = 9.12$  min (major), 17.33 min (minor)).

**(5*S*,6*R*)-5,6,8-triphenyl-3-tosyl-2,3,5,6-tetrahydrobenzo[*d*]azocin-4(1*H*)-one (2*t-ent*)**

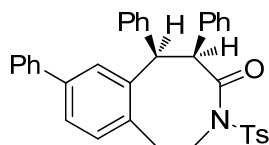

**2*t-ent***

Compound **2*t-ent*** was prepared in 50% yield (27.9 mg) according to the general procedure (Table 4, entry 3).  $[\alpha]_D^{20} = -90.0^\circ$  ( $c = 1.0$ ,  $\text{CHCl}_3$ ). 92.5:7.5 e.r. (determined by HPLC: Chiralcel AS-H Column, 10/90 *i*-PrOH/hexane, 2.0 mL/min, 235 nm, 25 °C;  $t_R = 11.79$  min (major), 21.63 min (minor)).

**(5*S*,6*R*)-9-methyl-5,6-diphenyl-3-tosyl-2,3,5,6-tetrahydrobenzo[*d*]azocin-4(1*H*)-one (2*w-ent*)**

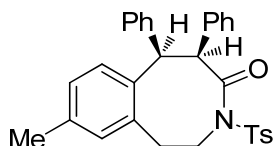

**2*w-ent***

Compound **2*w-ent*** was prepared in 51% yield (25.3 mg) according to the general procedure (Table 4, entry 4).  $[\alpha]_D^{20} = -83.2^\circ$  ( $c = 1.0$ ,  $\text{CHCl}_3$ ). 90:10 e.r. (determined by HPLC: Chiralcel AS-H Column, 8/92 *i*-PrOH/hexane, 1.0 mL/min, 235 nm, 25 °C;  $t_R = 20.43$  min (major), 29.99 min (minor)).

**(5*S*,6*R*)-8,9-dimethyl-5,6-diphenyl-3-tosyl-2,3,5,6-tetrahydrobenzo[*d*]azocin-4(1*H*)-one (2*z-ent*)**

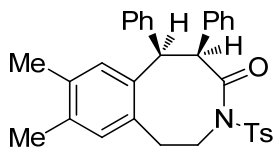

**2*z-ent***

Compound **2*z-ent*** was prepared in 46% yield (23.4 mg) according to the general procedure (Table 4, entry 5).  $[\alpha]_D^{20} = -115.9^\circ$  ( $c = 1.0$ ,  $\text{CHCl}_3$ ). 93:7 e.r. (determined by HPLC: Chiralcel AS-H Column, 5/95 *i*-PrOH/hexane, 1.3 mL/min, 235 nm, 25 °C;  $t_R = 22.45$  min (major), 32.57 min (minor)).

**(5*S*,6*R*)-5,6-diphenyl-3-tosyl-2,3,5,6-tetrahydronaphtho[2,3-*d*]azocin-4(1*H*)-one**  
**(2ab-ent)**

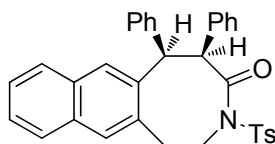

**2ab-ent**

Compound **2ab-ent** was prepared in 44% yield (23.4 mg) according to the general procedure (Table 4, entry 6).  $[\alpha]_D^{20} = -110.6^\circ$  ( $c = 1.0$ ,  $\text{CHCl}_3$ ). 96:4 e.r. (determined by HPLC: Chiralcel AS-H Column, 5/95 *i*-PrOH/hexane, 2.5 mL/min, 235 nm, 25 °C;  $t_R = 14.93$  min (major), 22.27 min (minor)).

**(5*S*,6*R*)-5,6-diphenyl-3-tosyl-2,3,5,6-tetrahydrobenzo[*d*]azocin-4(1*H*)-one** (**2a-ent**)

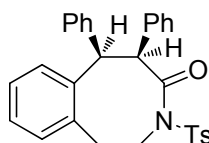

**2a-ent**

Compound **2a-ent** was prepared in 41% yield (19.8 mg) according to the general procedure (Table 4, entry 7).  $[\alpha]_D^{20} = -74.3^\circ$  ( $c = 1.0$ ,  $\text{CHCl}_3$ ). 89:11 e.r. (determined by HPLC: Chiralcel AS-H Column, 15/85 *i*-PrOH/hexane, 1.0 mL/min, 235 nm, 25 °C;  $t_R = 20.13$  min (major), 28.29 min (minor)).

**(5*S*,6*R*)-8-chloro-5,6-diphenyl-3-tosyl-2,3,5,6-tetrahydrobenzo[*d*]azocin-4(1*H*)-one**  
**(2u-ent)**

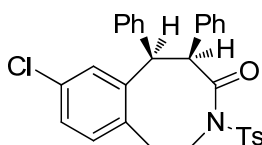

**2u-ent**

Compound **2u-ent** was prepared in 42% yield (21.7 mg) according to the general procedure (Table 4, entry 8).  $[\alpha]_D^{20} = -81.1^\circ$  ( $c = 1.0$ ,  $\text{CHCl}_3$ ). 89:11 e.r. (determined by

HPLC: Chiralcel AS-H Column, 20/80 *i*-PrOH/hexane, 1.0 mL/min, 235 nm, 25 °C;  $t_R$  = 15.95 min (major), 25.04 min (minor)).

### 5,6-diphenyl-2,3,5,6-tetrahydrobenzo[*d*]azocin-4(1*H*)-one (3a)

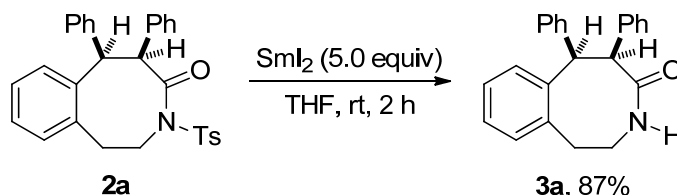

### Supplementary Figure 149. Synthesis of compound 3a.

Compound **3a** was prepared in 87% yield according to the known procedure.<sup>19</sup> Pale yellow solid (mp 199-200 °C).  $^1\text{H}$  NMR (500 MHz,  $\text{CDCl}_3$ )  $\delta$  7.39 (d,  $J = 7.5$  Hz, 2H), 7.34 (d,  $J = 7.5$  Hz, 2H), 7.22 – 7.06 (m, 9H), 6.90 (d,  $J = 7.5$  Hz, 1H), 6.22 (s, 1H), 4.92 (d,  $J = 5.0$  Hz, 1H), 4.81 (d,  $J = 5.0$  Hz, 1H), 3.67 – 3.54 (m, 1H), 3.35 – 3.14 (m, 2H), 2.99 – 2.87 (m, 1H);  $^{13}\text{C}$  NMR (125 MHz,  $\text{CDCl}_3$ )  $\delta$  175.8, 142.4, 140.1, 139.2, 138.1, 131.0, 130.9(9), 129.9, 129.2, 127.9(2), 127.9(1), 127.2, 126.9, 126.4, 126.3, 54.1, 53.2, 42.1, 36.4; IR (neat): 3286, 2922, 1660(s), 1496, 1446, 1412, 1288, 1032, 727, 530; HRESIMS Calcd for  $[\text{C}_{23}\text{H}_{21}\text{NNaO}]^+$  ( $\text{M} + \text{Na}^+$ ) 350.1515, found 350.1514.

### 3-methyl-5,6-diphenyl-2,3,5,6-tetrahydrobenzo[*d*]azocin-4(1*H*)-one (4a)

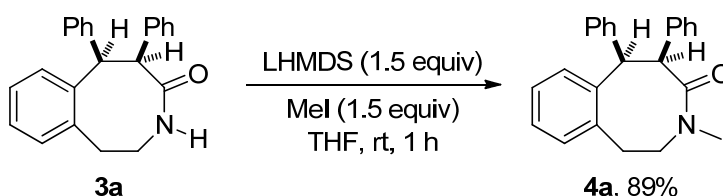

### Supplementary Figure 150. Synthesis of compound 4a.

Compound **4a** was prepared in 89% yield according to the known procedure.<sup>20</sup> Pale yellow oil.  $^1\text{H}$  NMR (500 MHz,  $\text{CDCl}_3$ )  $\delta$  7.42 (d,  $J = 7.5$  Hz, 2H), 7.37 (d,  $J = 7.0$  Hz, 2H), 7.19 – 7.06 (m, 9H), 6.88 (d,  $J = 8.0$  Hz, 1H), 5.04 (d,  $J = 6.5$  Hz, 1H), 4.93 (d,  $J = 7.0$  Hz, 1H), 4.09 – 3.96 (m, 1H), 3.47 – 3.33 (m, 2H), 3.11 – 3.03 (m, 1H), 2.73 (s, 3H);  $^{13}\text{C}$  NMR (125 MHz,  $\text{CDCl}_3$ )  $\delta$  172.6, 142.4, 139.9, 139.4, 137.0, 130.7, 130.6, 130.5, 129.4, 127.8, 127.7, 127.1, 127.0, 126.2, 126.1, 54.1, 52.2, 50.4, 36.9, 35.3; IR (neat):



2925, 1642(s), 1492, 1453, 1398, 1185, 1091, 733, 698, 559; HRESIMS Calcd for  $[C_{24}H_{23}NNaO]^+$  ( $M + Na^+$ ) 364.1672, found 364.1673.

**(Z)-5,6-diphenyl-2,3-dihydrobenzo[d]azocin-4(1H)-one (5a)**

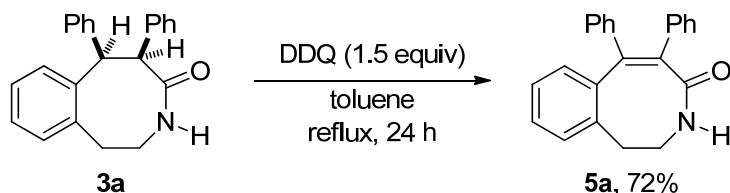

**Supplementary Figure 151. Synthesis of compound 5a.**

Compound **5a** was prepared in 72% yield according to the known procedure.<sup>21</sup> Pale yellow oil.  $^1H$  NMR (400 MHz,  $CDCl_3$ )  $\delta$  7.52 – 7.41 (m, 2H), 7.26 – 7.09 (m, 9H), 7.04 (d,  $J = 7.2$  Hz, 1H), 7.02 – 6.94 (m, 2H), 6.08 – 5.88 (m, 1H), 3.79 – 3.62 (m, 1H), 3.60 – 3.45 (m, 1H), 3.37 – 3.21 (m, 1H), 3.10 – 2.96 (m, 1H);  $^{13}C$  NMR (100 MHz,  $CDCl_3$ )  $\delta$  173.5, 142.0, 139.6, 139.5, 135.9, 135.8, 135.2, 130.4, 130.3, 130.2, 129.3, 128.3, 128.2, 128.0, 127.7, 127.4, 127.1, 40.2, 33.9; IR (neat): 3446, 2923, 1650(s), 1487, 1442, 1404, 1350, 1110, 732, 697, 508; HRESIMS Calcd for  $[C_{23}H_{19}NNaO]^+$  ( $M + Na^+$ ) 348.1359, found 348.1357.

**(E)-3-benzylidene-1-phenyl-4-tosyl-3,4,5,6-tetrahydro-1H-benzo[f][1,3]oxazocine (6a)**

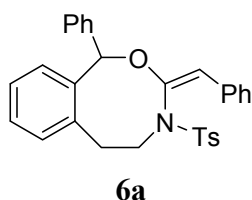

Compound **6a** was prepared in 53% yield (51.0 mg) according to the general procedure (Eq. 4). White solid (mp 181-182 °C).  $^1H$  NMR (500 MHz,  $CDCl_3$ )  $\delta$  7.81 (d,  $J = 8.0$  Hz, 2H), 7.36 – 7.29 (m, 3H), 7.24 – 7.18 (m, 6H), 7.17 – 7.09 (m, 3H), 6.99 (d,  $J = 8.0$  Hz, 2H), 6.93 (dd,  $J = 7.0$  Hz,  $J = 1.5$  Hz, 1H), 6.84 (dd,  $J = 7.0$  Hz,  $J = 1.5$  Hz, 1H), 5.51 (s, 1H), 5.38 (s, 1H), 4.41 – 4.30 (m, 1H), 3.10 (t,  $J = 12.5$  Hz, 1H), 2.91 (t,  $J = 13.5$  Hz, 1H), 2.59 (dd,  $J = 14.5$  Hz,  $J = 2.0$  Hz, 1H), 2.26 (s, 3H);  $^{13}C$  NMR (125 MHz,  $CDCl_3$ )  $\delta$  144.2, 143.7, 139.1, 139.0, 138.3, 138.1, 133.1, 129.7, 129.4, 129.1, 129.0, 128.4, 127.8, 127.6, 127.5, 127.4, 127.2, 127.0, 126.6, 113.0, 75.8, 49.4, 34.5, 21.4; IR (neat): 2927,

1488, 1447, 1351, 1220, 1161, 1085, 776, 697, 577; HRESIMS Calcd for  $[\text{C}_{30}\text{H}_{27}\text{NNaO}_3\text{S}]^+$  ( $\text{M} + \text{Na}^+$ ) 504.1604, found 504.1606.

**(*E*)-3-benzylidene-9-methyl-1-phenyl-4-tosyl-3,4,5,6-tetrahydro-1*H*-benzo[*f*][1,3]oxazocine (6p)**

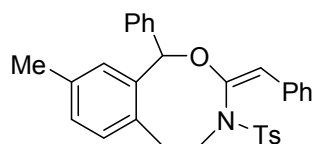

**6p**

White solid (mp 175-176 °C).  $^1\text{H}$  NMR (500 MHz,  $\text{CDCl}_3$ )  $\delta$  7.79 (d,  $J = 7.5$  Hz, 2H), 7.37 – 7.30 (m, 3H), 7.25 – 7.12 (m, 7H), 6.97 (d,  $J = 8.0$  Hz, 2H), 6.93 (d,  $J = 7.5$  Hz, 1H), 6.81 (d,  $J = 7.5$  Hz, 1H), 6.62 (s, 1H), 5.54 (s, 1H), 5.34 (s, 1H), 4.35 (d,  $J = 14.5$  Hz, 1H), 3.04 (t,  $J = 13.5$  Hz, 1H), 2.89 (t,  $J = 13.5$  Hz, 1H), 2.55 (d,  $J = 14.0$  Hz, 1H), 2.24 (s, 3H), 2.15 (s, 3H);  $^{13}\text{C}$  NMR (125 MHz,  $\text{CDCl}_3$ )  $\delta$  144.2, 143.6, 139.2, 138.1, 138.0, 137.0, 136.1, 133.2, 129.8, 129.7, 129.4, 129.3, 128.4, 127.7, 127.6, 127.3, 127.1, 126.9, 126.6, 112.8, 75.8, 49.6, 34.1, 21.4, 21.0; IR (neat): 2922, 1597, 1494, 1445, 1352, 1219, 1161, 1086, 688, 579; HRESIMS Calcd for  $[\text{C}_{31}\text{H}_{29}\text{NNaO}_3\text{S}]^+$  ( $\text{M} + \text{Na}^+$ ) 518.1760, found 518.1764.

**Methyl-(*E*)-2-(3-benzylidene-4-tosyl-3,4,5,6-tetrahydro-1*H*-benzo[*f*][1,3]oxazocin-1-yl)acrylate (6ag)**

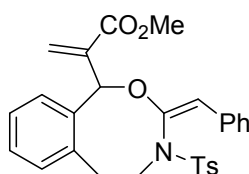

**6ag**

Compound **6ag** was prepared in 59% yield (57.8 mg) according to the general procedure. Yellow solid (mp 189-190 °C).  $^1\text{H}$  NMR (400 MHz,  $\text{CDCl}_3$ )  $\delta$  7.87 (d,  $J = 8.0$  Hz, 2H), 7.30 – 7.07 (m, 10H), 6.92 (d,  $J = 7.2$  Hz, 1H), 6.60 (s, 1H), 6.39 (s, 1H), 5.42 (s, 1H), 5.08 (s, 1H), 4.40 – 4.30 (m, 1H), 3.49 (s, 3H), 3.11 – 2.99 (m, 1H), 2.91 – 2.80 (m, 1H), 2.52 (dd,  $J = 14.4$  Hz,  $J = 2.8$  Hz, 1H), 2.39 (s, 3H);  $^{13}\text{C}$  NMR (100 MHz,  $\text{CDCl}_3$ )  $\delta$  165.0, 143.8, 143.7, 138.9, 138.3, 137.4, 135.7, 132.9, 129.8, 129.7, 129.2, 128.4, 127.6,

127.4, 127.1, 126.2, 113.1, 72.5, 51.6, 49.4, 34.0, 21.5; IR (neat): 2924, 1720(s), 1597, 1490, 1445, 1352, 1288, 1160, 1085, 757, 670; HRESIMS Calcd for  $[C_{28}H_{27}NNaO_5S]^+$  ( $M + Na^+$ ) 512.1502, found 512.1501.

Of note, the two enantiomers of **1p** could not be separated by chiral HPLC, so we determined the ee of **1p**'s precursor **1p'**.

**(R)-N-(2-(hydroxy(phenyl)methyl)-4-methylphenethyl)-4-methylbenzenesulfonamide (R-1p')**

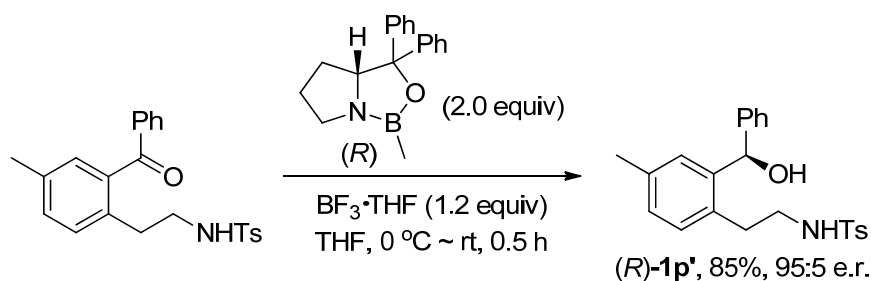

**Supplementary Figure 152. Synthesis of compound (R)-1p'.**

Compound (R)-**1p'** was prepared in 85% yield according to the known procedure.<sup>22</sup> The absolute configuration of (R)-**1p'** was determined by Corey's protocol.<sup>23</sup>  $[\alpha]_D^{20} = -55.3^\circ$  ( $c = 1.0$ ,  $CHCl_3$ ). 95:5 e.r. (determined by HPLC: Chiralcel AD-H Column, 20/80 *i*-PrOH/hexane, 1.0 mL/min, 235 nm, 25 °C;  $t_R = 18.90$  min (minor), 24.01 min (major)). Pale yellow oil. <sup>1</sup>H NMR (400 MHz,  $CDCl_3$ )  $\delta$  7.55 (d,  $J = 8.0$  Hz, 2H), 7.25 – 7.17 (m, 5H), 7.14 (d,  $J = 8.0$  Hz, 2H), 7.05 (s, 1H), 6.94 – 6.85 (m, 2H), 5.88 (d,  $J = 3.6$  Hz, 1H), 5.59 (t,  $J = 5.2$  Hz, 1H), 3.41 (d,  $J = 4.0$  Hz, 1H), 2.99 (dd,  $J = 12.4$  Hz,  $J = 6.8$  Hz, 2H), 2.77 – 2.60 (m, 2H), 2.35 (s, 3H), 2.22 (s, 3H); <sup>13</sup>C NMR (100 MHz,  $CDCl_3$ )  $\delta$  143.2, 142.9, 141.2, 136.6, 136.2, 132.9, 129.9, 129.4, 128.5(8), 128.5(6), 128.2, 127.1, 126.9, 126.5, 72.9, 44.0, 31.6, 21.4, 21.0; IR (neat): 3461 (bs), 2979, 1493, 1450, 1322, 1154, 1093, 1018, 761, 662, 550; HRESIMS Calcd for  $[C_{23}H_{25}NNaO_3S]^+$  ( $M + Na^+$ ) 418.1447, found 418.1443.

**(S)-N-(2-(hydroxy(phenyl)methyl)-4-methylphenethyl)-4-methylbenzenesulfonamide (S-1p')**

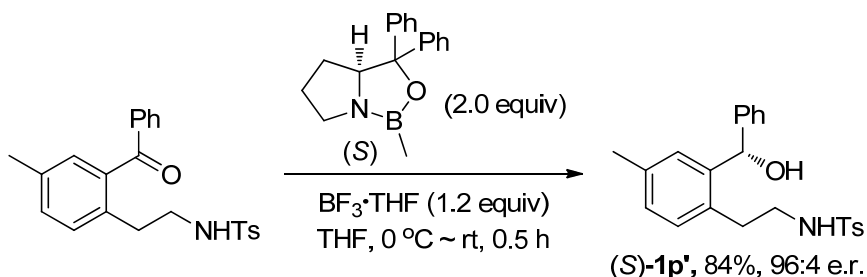

**Supplementary Figure 153.** Synthesis of compound **(S)-1p'**.

Compound **(S)-1p'** was prepared in 84% yield according to the known procedure.<sup>22</sup>  $[\alpha]_{\text{D}}^{20} = +58.1^\circ$  ( $c = 1.0$ ,  $\text{CHCl}_3$ ). 96:4 e.r. (determined by HPLC: Chiralcel AD-H Column, 20/80 *i*-PrOH/hexane, 1.0 mL/min, 235 nm, 25 °C;  $t_{\text{R}} = 18.66$  min (major), 23.73 min (minor)).

**(R,E)-3-benzylidene-9-methyl-1-phenyl-4-tosyl-3,4,5,6-tetrahydro-1H-benzo[f][1,3]oxazocine (R-6p)**

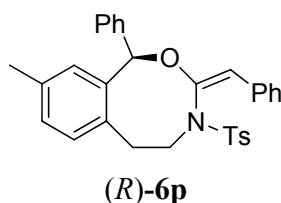

$[\alpha]_{\text{D}}^{20} = -63.6^\circ$  ( $c = 1.0$ ,  $\text{CHCl}_3$ ). 88:12 e.r. (determined by HPLC: Chiralcel AS-H Column, 10/90 *i*-PrOH/hexane, 1.0 mL/min, 254 nm, 25 °C;  $t_{\text{R}} = 21.67$  min (minor), 30.68 min (major)).

**(5S,6R)-8-methyl-5,6-diphenyl-3-tosyl-2,3,5,6-tetrahydrobenzo[d]azocin-4(1H)-one (R, S-2p)**

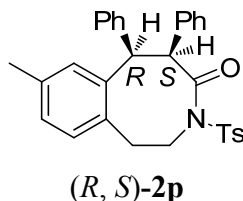

Compound **(R, S)-2p** was prepared from **(R)-1p** (e.r. 95:5) with **Cat. 3** according to the general procedure.  $[\alpha]_{\text{D}}^{20} = -120.8^\circ$  ( $c = 1.0$ ,  $\text{CHCl}_3$ ). >99:1 e.r. (determined by HPLC: Chiralcel AS-H Column, 20/80 *i*-PrOH/hexane, 1.0 mL/min, 235 nm, 25 °C;  $t_{\text{R}} = 13.59$  min (major), 18.99 min (minor)).

**(5*S*,6*R*)-8-methyl-5,6-diphenyl-3-tosyl-2,3,5,6-tetrahydrobenzo[*d*]azocin-4(1*H*)-one**  
**(*R*, *S*-2p)**

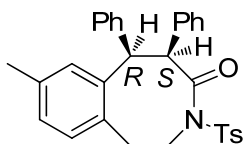

**(*R*, *S*)-2p**

Compound (*R*, *S*)-2p was prepared from (*R*)-1p (e.r. 95:5) with HOTf according to the general procedure.  $[\alpha]_D^{20} = -104.1^\circ$  ( $c = 1.0$ ,  $\text{CHCl}_3$ ). 96:4 e.r. (determined by HPLC: Chiralcel AS-H Column, 20/80 *i*-PrOH/hexane, 1.0 mL/min, 235 nm, 25 °C;  $t_R = 12.64$  min (major), 18.74 min (minor)).

**(5*R*,6*S*)-8-methyl-5,6-diphenyl-3-tosyl-2,3,5,6-tetrahydrobenzo[*d*]azocin-4(1*H*)-one**  
**(*S*, *R*-2p)**

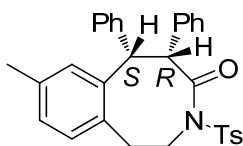

**(*S*, *R*)-2p**

Compound (*S*, *R*)-2p was prepared from (*S*)-1p (e.r. 96:4) with **Cat. 3** according to the general procedure.  $[\alpha]_D^{20} = +80.3^\circ$  ( $c = 1.0$ ,  $\text{CHCl}_3$ ). 89:11 e.r. (determined by HPLC: Chiralcel AS-H Column, 20/80 *i*-PrOH/hexane, 1.0 mL/min, 235 nm, 25 °C;  $t_R = 13.46$  min (minor), 20.23 min (major)).

## Supplementary Notes

### Computational Methods

All the geometry optimizations and related single point energy amelioration were performed by Gaussian 09<sup>24</sup> at the level of density functional theory, using the dispersion-corrected B3LYP, M062X and  $\omega$ B97XD functional without any symmetry constraints.<sup>25-27</sup> The 6-31G(d,p) basis set was used for optimizations for all three methods. The single point energies were further estimated using a larger basis set def2TZVPP<sup>28-29</sup> for all atoms with the SMD solvation model.<sup>30</sup> In accordance with the experimental conditions, chlorobenzene was used as solvent in the calculations. All optimized species were verified as either minima or transition structures by the presence of zero or a single imaginary vibrational frequency. Free energies were evaluated at 298.15 K using harmonic vibrational frequencies. Quasi-harmonic Gibbs free energies<sup>31</sup> were evaluated at the reaction temperature (333.15K) using vibrational frequencies: rigid rotor harmonic oscillator (RRHO) vibrational entropies were used above 100 cm<sup>-1</sup>, while a free rotor description was used below this value, as described by Grimme.<sup>32-33</sup> In testing, this correction was more robust toward choice of cutoff frequency than an alternative quasi-harmonic treatment proposed by Cramer and Truhlar.<sup>34</sup> All the calculated structures were displayed with the CYLview software.<sup>35</sup> The relevant calculation results are summarized in Supplementary Figs. 111-117 and and Supplementary Datasets 1-4.

## Supplementary Discussion

### More Reaction Scope Study

Attempts to extend the reaction to the terminal ynamide **1an** only gave a complex mixture of products (Supplementary Figs. 118). In addition, the reaction of ynamides **1ao** and **1ap** only led to the formation of the corresponding hydroalkoxylation product **6ao** (even with longer reaction time and higher temperature) and transfer hydration product **2ap'** (presumably via intermediate **6ap**) in 94% and 90% yields, respectively (Supplementary Figs. 118). These results indicate that the formation of stable benzylic carbocation is the key for the subsequent [1,3]-rearrangement. Of note, the reaction of methoxyl-protected ynamide **1aq** only led to the formation of the corresponding hydration product **2aq'** in 78% yield (Supplementary Figs. 119).

### Detailed Studies on the Asymmetric Process

1) Control experiments revealed that the chiral induction was achieved via kinetic resolution of racemic ynamide substrate (Supplementary Figs. 121). That is, one enantiomer ((*R*)-**1p**) favored formation of the desired chiral benzo[*d*]azocinone **2p-ent** while the other enantiomer ((*S*)-**1p**), which does not match with the **Cat. 3**, favored formation of the corresponding hydration product **2p'** catalyzed by the acid. Notably, the e.r. of **2p'** should depend on the reaction rate of the hydration of the two enantiomers in the presence of **Cat. 3**.

2) The chirality of product was determined in the hydroalkoxylation process and the [1,3]-rearrangement is a stereospecific process, as also confirmed by the control reactions of the ketene aminal **6p** (Supplementary Figs. 122). It is notable that the e.r. of product **2p** is slightly higher than the intermediate **6p**. While the exact reason for the slight chirality amplification remains unclear, we suspect that it may come from the measurement error of HPLC due to the different UV absorption of two enantiomers, or a small amount of the minor enantiomer may undergo other side reactions due to its unique configuration of eight-membered ring.

3) To further confirm the above results, we first synthesized both enantiomers of **1p**. It was found that the reaction of ynamide (*R*)-**1p** led to the desired chiral benzo[*d*]azocinone (*R,S*)-**2p** smoothly while ynamide (*S*)-**1p**, which does not match with the **Cat. 3**, was mainly converted into the corresponding hydration product (*S*)-**2p'** in 65% yield catalyzed by the acid (Supplementary Figs. 123). And the residue of (*S*)-**1p** was eventually converted into the corresponding chiral benzo[*d*]azocinone (*S,R*)-**2p** with opposite enantioselectivity in 30% yield with a much longer reaction time (22 h vs 12 h). This result also well explained the significantly improved e.r. (>99:1) of the benzo[*d*]azocinone product in comparison with the e.r. of chiral ynamide (*R*)-**1p** (95:5), as most of the other enantiomer (*S*)-**1p** underwent hydration reaction readily in the presence of the unmatched chiral catalyst.

4) Of note, efficient chirality transfer was also observed starting from the chiral ynamide in the presence of HOTf as catalyst, which is quite consistent with the above experimental results (Supplementary Figs. 124).

5) Although the use of 20 mol % of chiral catalyst is not so impressive, chiral catalyst can be readily recovered by column chromatography and reused five times with almost unchanged enantioselectivity and reactivity (Supplementary Figs. 125).

6) As mentioned above, the kinetic resolution in this reaction is actually a parallel kinetic resolution. Therefore, the conversion is almost 100% in every case if based on the starting material. To better calculate or understand the selectivity factor of this kinetic resolution, the conversion in this case is based on the NMR yield of the cyclization product. Thus, the detailed Selectivity factors are summarized in Supplementary Table 9.

#### Other Mechanistic Studies

Control experiment with H<sub>2</sub><sup>18</sup>O isotopic labeling revealed that no incorporation of <sup>18</sup>O into the product **2a** was observed (Supplementary Figs. 126). In addition, attempts to convert the hydration product **2a'** into the corresponding benzo[*d*]azocinone **2a** under the standard conditions failed, and only **2a'** was recovered (Supplementary Figs. 127). Notably, both HOTf and Zn(OTf)<sub>2</sub> did not promote the [1,3] rearrangement process (Supplementary Figs. 128). Finally, the structure of **6ag** was confirmed by X-ray diffraction (Supplementary Figs. 129 and Supplementary Table 7), and the configuration of **6a** was assigned (as *E* configuration of the double bond) by analogy. Of note, only the *cis* diastereoisomer (d.r. > 50:1; determined by crude <sup>1</sup>H NMR spectroscopy) of products **2** was observed in all cases, and the *trans* diastereoisomer was not detected even by monitoring the tandem process by <sup>1</sup>H NMR. These results indicate that the present [1,3]-rearrangement is highly stereospecific, and the *E* isomer of intermediate **6** leads to the stereospecific formation of *cis* diastereoisomer of final product **2**.



## Supplementary References

1. Zhang, Y.; Hsung, R. P.; Tracey, M. R.; Kurtz, K. C. M.; Vera, E. L. Copper sulfate-pentahydrate-1,10-phenanthroline catalyzed amidations of alkynyl bromides. Synthesis of heteroaromatic amine substituted ynamides. *Org. Lett.* **2004**, *6*, 1151.
2. Kurouchi, H.; Kawamoto, K.; Sugimoto, H.; Nakamura, S.; Otani, Y.; Ohwada, T. Activation of electrophilicity of stable Y-delocalized carbamate cations in intramolecular aromatic substitution reaction: evidence for formation of diprotonated carbamates leading to generation of isocyanates. *J. Org. Chem.* **2012**, *77*, 9313.
3. Kong, K.; Moussa, Z.; Lee, C.; Romo, D. Total synthesis of the spirocyclic imine marine toxin (-)-Gymnodimine and an unnatural C4-epimer. *J. Am. Chem. Soc.* **2011**, *133*, 19844.
4. Sall, D. J.; Grunewald, G. L. Inhibition of phenylethanolamine *N*-methyltransferase (PNMT) by aromatic hydroxy-substituted 1,2,3,4-tetrahydroisoquinolines. Further studies on the hydrophilic pocket of the aromatic ring binding region of the active site. *J. Med. Chem.* **1987**, *30*, 2208.
5. Wang, M.; Khan, S.; Miliordos, E.; Chen, M. Enantioselective syntheses of homopropargylic alcohols via asymmetric allenylboration. *Org. Lett.* **2018**, *20*, 3810.
6. Murashige, R.; Ohtsuka, Y.; Sagisawa, K.; Shiraishi, M. Versatile synthesis of 3,4-dihydroisoquinolin-1(2*H*)-one derivatives via intra-molecular Friedel-Crafts reaction with trifluoromethanesulfonic acid. *Tetrahedron Lett.* **2015**, *56*, 3410.
7. In, J.; Hwang, S.; Kim, C.; Seo, J. H.; Kim, S. Synthesis of 3,4-dihydroisoquinolin-1-ones from *N*-Boc-( $\beta$ -arylethyl)carbamates via isocyanate intermediates. *Eur. J. Org. Chem.* **2013**, 965.
8. Michon, C. et al. Catalytic asymmetric allylic alkylation of 3-arylated piperidin-2-ones. *Eur. J. Org. Chem.* **2013**, 4979.
9. He, Z.; Wibbeling, B.; Studer, A. Oxidative Heck coupling of allylic amines with 2,2,6,6-tetramethylpiperidine-*N*-oxyl (TEMPO) as oxidant for the preparation of tetrasubstituted alkenes. *Adv. Synth. Catal.* **2013**, *355*, 3639.
10. Chen, S.; Feng, B.; Zheng, X.; Yin, J.; Yang, S.; You, J. Iridium-catalyzed direct regioselective C4-amidation of indoles under mild conditions. *Org. Lett.* **2017**, *19*, 2502.

11. Mondal, A.; Hazra, R.; Grover, J.; Raghu, M.; Ramasastry, S. S. V. Organophosphine-catalyzed intramolecular hydroacylation of activated alkynes. *ACS Catal.* **2018**, *8*, 2748.
12. Gigant, N.; Claveau, E.; Bouyssou, P.; Gillaizeau, I. Diversity-oriented synthesis of polycyclic diazinic scaffolds. *Org. Lett.* **2012**, *14*, 844.
13. Hirano, S.; Tanaka, R.; Urabe, H.; Sato, F. Practical preparation of *N*-(1-alkynyl)sulfonamides and their remote diastereoselective addition to aldehydes via titanation. *Org. Lett.* **2004**, *6*, 727.
14. Salamoun, J. M. et al. Photooxygenation of an amino-thienopyridone yields a more potent PTP4A3 inhibitor. *Org. Biomol. Chem.* **2016**, *14*, 6398.
15. Nissen, F.; Richard, V.; Alayrac, C.; Witulski, B. Synthesis of  $\beta$ - and  $\gamma$ -carbolines via ruthenium and rhodium catalysed [2+2+2] cycloadditions of yne-ynamides with methylcyanoformate. *Chem. Commun.* **2011**, *47*, 6656.
16. Feng, J.; Lv, M. F.; Lu, G. P.; Cai, C. Selective formation of C–N and C=N bonds via C(sp<sup>3</sup>)–H activation of isochroman in the presence of DTBP. *Org. Chem. Front.* **2015**, *2*, 60.
17. Poloukhine, A.; Rassadin, V.; Kuzmin, A.; Popik, V. V. Nucleophilic cycloaromatization of ynamide-terminated enediynes. *J. Org. Chem.* **2010**, *75*, 5953.
18. Hong, X. et al. Mechanism and selectivity of *N*-triflylphosphoramidate catalyzed (3<sup>+</sup>+2) cycloaddition between hydrazones and alkenes. *J. Am. Chem. Soc.* **2014**, *136*, 13769.
19. Pace, V.; Rae, J. P.; Procter, D. J. Cu(I)–NHC catalyzed asymmetric silyl transfer to unsaturated lactams and amides. *Org. Lett.* **2014**, *16*, 476.
20. Li, S.; Ji, H.; Cai, L.; Li, G. Pd(II)-catalyzed remote regiodivergent *ortho*- and *meta*-C–H functionalizations of phenylethylamines. *Chem. Sci.* **2015**, *6*, 5595.
21. Magolan, J.; Carson, C. A.; Kerr, M. A. Total synthesis of (±)-Mersicarpine. *Org. Lett.* **2008**, *10*, 1437.
22. Corey, E. J.; Bakshi, R. K.; Shibata, S. Highly enantioselective borane reduction of ketones catalyzed by chiral oxazaborolidines. Mechanism and synthetic implications. *J. Am. Chem. Soc.* **1987**, *109*, 5551.

23. Corey, E. J.; Helal, C. J. Asymmetric synthesis of (*S*)-carbinoxamine. New aspects of oxazaborolidine-catalyzed enantioselective carbonyl reduction. *Tetrahedron Lett.* **1996**, *37*, 5675.
24. Frisch, M. J. et al. *Gaussian 09, Revision D.01*, Gaussian, Inc., Wallingford CT, (2013).
25. Zhao, Y.; Truhlar, D. G. The M06 suite of density functionals for main group thermochemistry, thermochemical kinetics, noncovalent interactions, excited states, and transition elements: two new functionals and systematic testing of four M06-class functionals and 12 other functionals. *Theor. Chem. Accounts.* **2008**, *120*, 215.
26. Chai, J. D.; Head-Gordon, M. Long-range corrected hybrid density functionals with damped atom–atom dispersion corrections. *Phys. Chem. Chem. Phys.* **2008**, *10*, 6615.
27. Stephens, P. J.; Devlin, F. J.; Chabalowski, C. F.; Frisch, M. J. Ab initio calculation of vibrational absorption and circular dichroism spectra using density functional force fields. *J. Phys. Chem.* **1994**, *98*, 11623.
28. Weigend, F.; Ahlrichs, R. Balanced basis sets of split valence, triple zeta valence and quadruple zeta valence quality for H to Rn: design and assessment of accuracy. *Phys. Chem. Chem. Phys.* **2005**, *7*, 3297.
29. Weigend, F. Accurate Coulomb-fitting basis sets for H to Rn. *Phys. Chem. Chem. Phys.* **2006**, *8*, 1057.
30. Marenich, A. V.; Cramer, C. J.; Truhlar, D. G. Universal solvation model based on solute electron density and on a continuum model of the solvent defined by the bulk dielectric constant and atomic surface tensions. *J. Phys. Chem. B* **2009**, *113*, 6378.
31. Funes-Ardoiz, I.; Paton, R. S. GoodVibes fv2.0.1; doi: 0.5281/ zenodo.56091 (accessed 21 June 2016).
32. Grimme, S.; Ehrlich, S.; Georigk, L. Effect of the damping function in dispersion corrected density functional theory. *J. Comput. Chem.* **2011**, *32*, 1456.
33. Grimme, S. Supramolecular binding thermodynamics by dispersion-corrected density functional theory. *Chem. - Eur. J.* **2012**, *18*, 9955.
34. Ribeiro, R. F.; Marenich, A. V.; Cramer, C. J.; Truhlar, D. G. Use of solution-phase vibrational frequencies in continuum models for the free energy of solvation. *J. Phys. Chem. B* **2011**, *115*, 14556 .

35. Legault, C. Y. *CYLview, 1.0b*; Université de Sherbrooke uébec, Montreal, Canada, 2009 <http://www.cylview.org>.
