# Supplementary material for: Stereoselective synthesis of medium lactams enabled by metal-free hydroalkoxylation/stereospecific [1,3]-rearrangement
Source: PubMed Central journal article supplement (PMC6642132; doi:10.1038/s41467-019-11245-2), 2019-07-19
Supplement: 41467_2019_11245_MOESM3_ESM.pdf [file 41467_2019_11245_MOESM3_ESM.pdf]

## Description of Additional Supplementary Files

Supplementary Data 1: Energy and imaginary vibrational frequency of calculated structures using B3LYP-D3 method.

Supplementary Data 2: Energy and imaginary vibrational frequency of calculated structures using M062X method.

Supplementary Data 3: Energy and imaginary vibrational frequency of calculated structures using  $\omega$ B97XD method.

Supplementary Data 4: B3LYP-D3 (SMD, chlorobenzene) for optimization, Cartesian Coordinates and Energies in Hartree
