# Supplementary material for: Stereoselective synthesis of medium lactams enabled by metal-free hydroalkoxylation/stereospecific [1,3]-rearrangement
Source: PubMed Central journal article supplement (PMC6642132; doi:10.1038/s41467-019-11245-2), 2019-07-19
Supplement: 41467_2019_11245_MOESM4_ESM.pdf [file 41467_2019_11245_MOESM4_ESM.pdf]

Energy and imaginary vibrational frequency of calculated structures using  
B3LYP-D3 method.

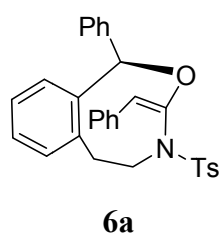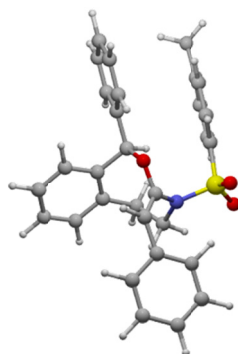

E= -1838.109717 Hartree

E<sub>SMD</sub>=-1838.720846 Hartree

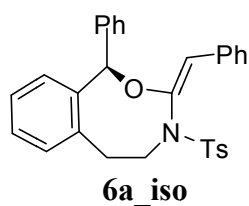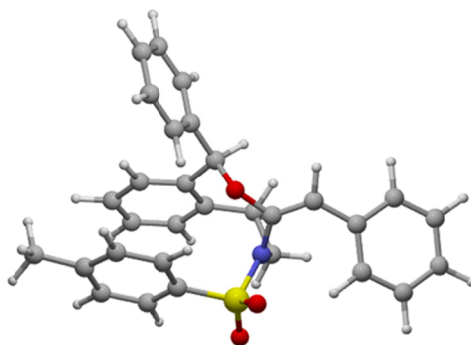

E= -1838.102423 Hartree

E<sub>SMD</sub>= -1838.71482 Hartree

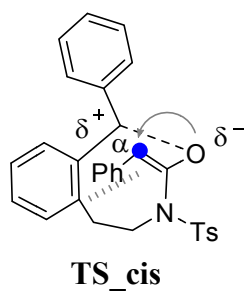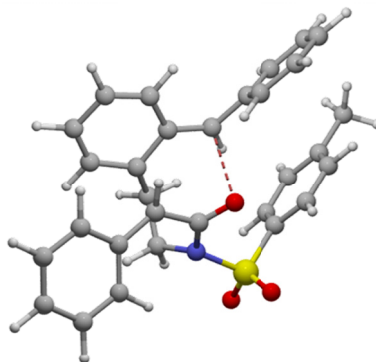

E=-1838.064467 Hartree

E<sub>SMD</sub>= -1838.677033 Hartree

Frequency= -205.64 cm<sup>-1</sup>

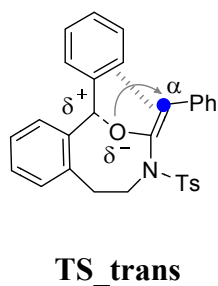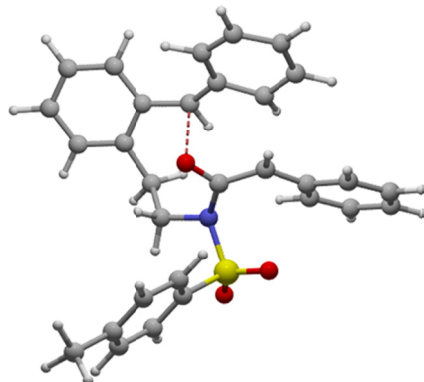

E= -1838.042421 Hartree

E<sub>SMD</sub>= -1838.660252 Hartree

Frequency= -203.95 cm<sup>-1</sup>

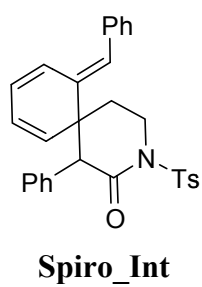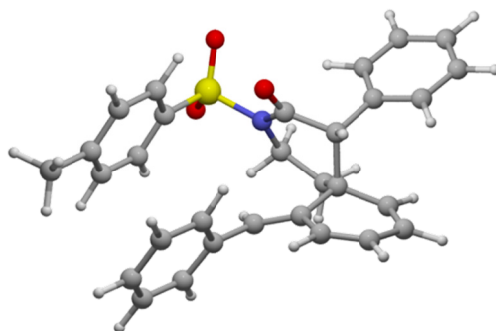

E=-1838.090101 Hartree

E<sub>SMD</sub>= -1838.702537 Hartree

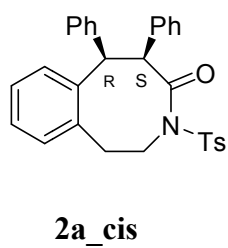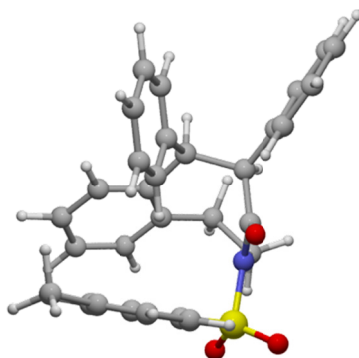

E= -1838.133234 Hartree

E<sub>SMD</sub>= -1838.742115 Hartree

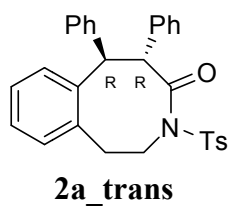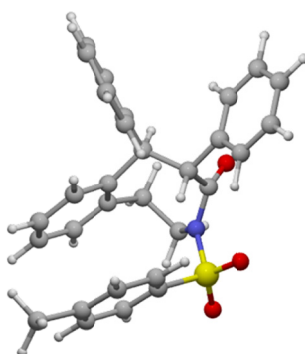

E= -1838.128214 Hartree

E<sub>SMD</sub>=-1838.742451 Hartree
