# Supplementary material for: Stereoselective synthesis of medium lactams enabled by metal-free hydroalkoxylation/stereospecific [1,3]-rearrangement
Source: PubMed Central journal article supplement (PMC6642132; doi:10.1038/s41467-019-11245-2), 2019-07-19
Supplement: 41467_2019_11245_MOESM5_ESM.pdf [file 41467_2019_11245_MOESM5_ESM.pdf]

Energy and imaginary vibrational frequency of calculated structures using M062X method.

---

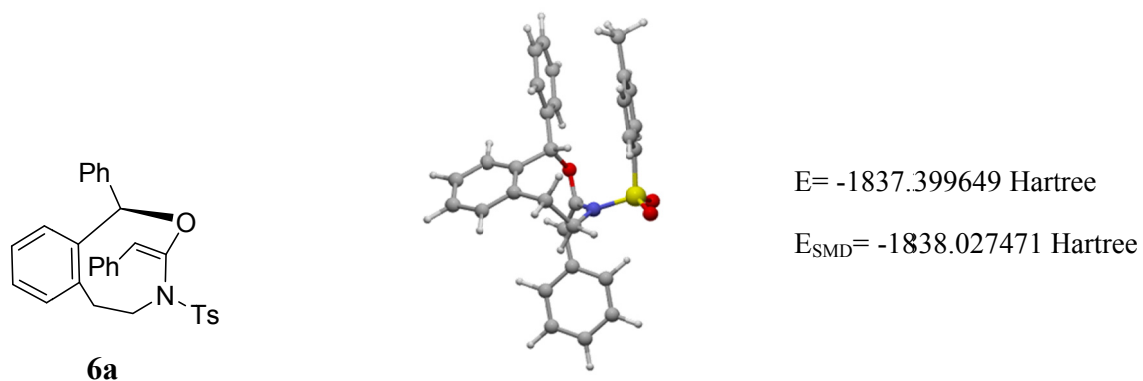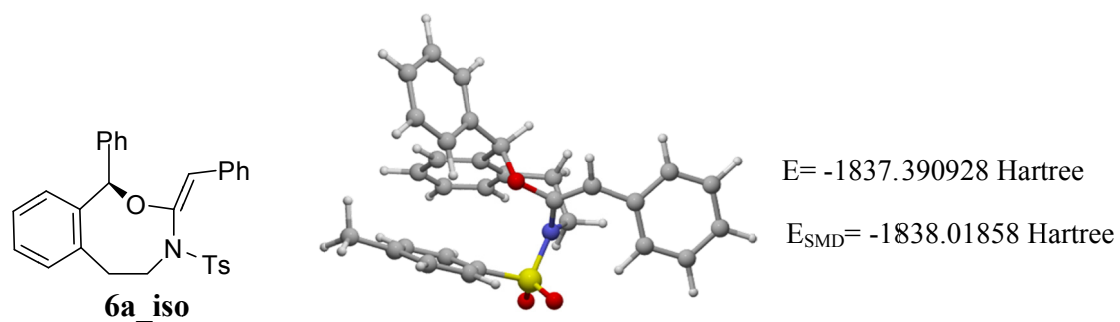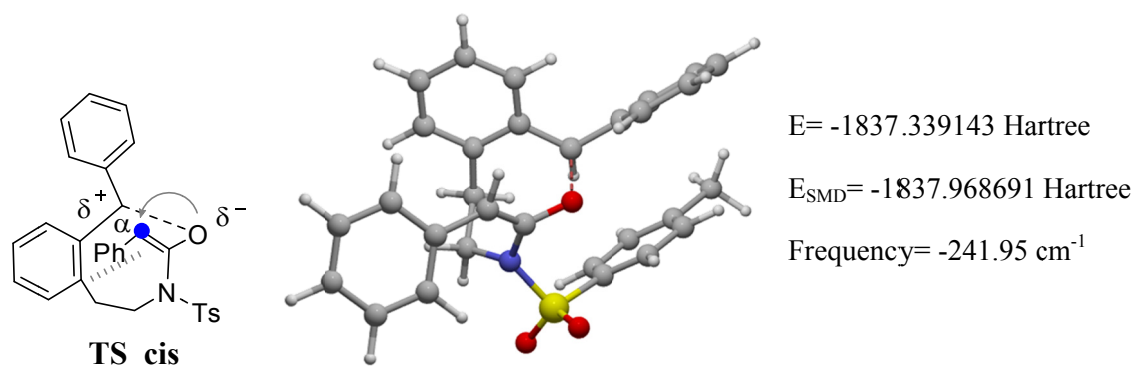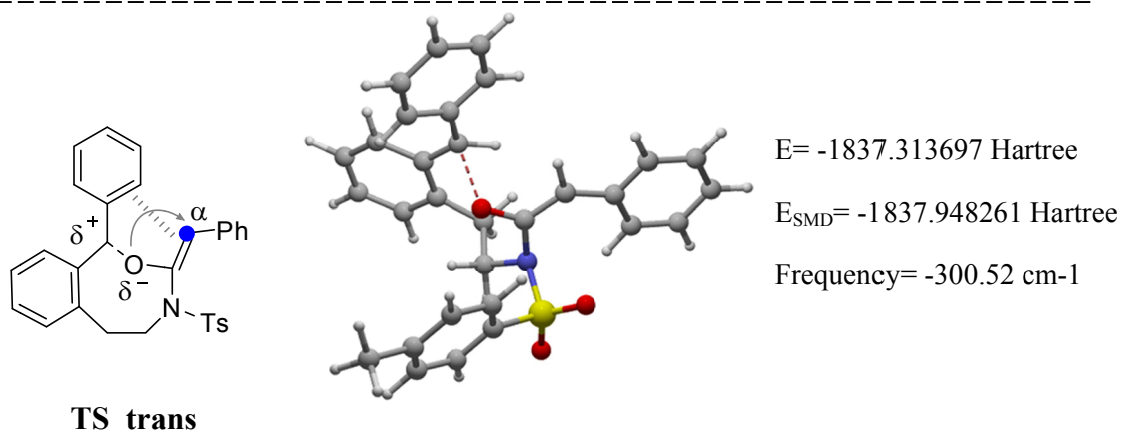

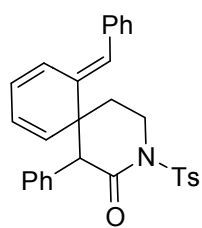

**Spiro\_Int**

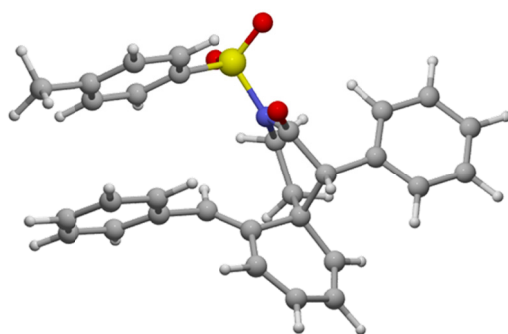

E= -1837.381669 Hartree

E<sub>SMD</sub>= -1838.009498 Hartree

---

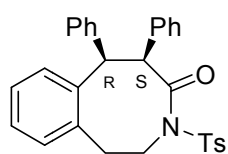

**2a\_cis**

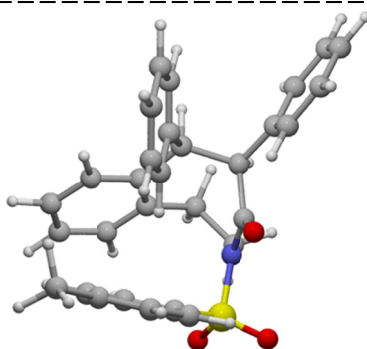

E= -1837.424244 Hartree

E<sub>SMD</sub>= -1838.050336 Hartree

---

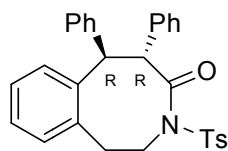

**2a\_trans**

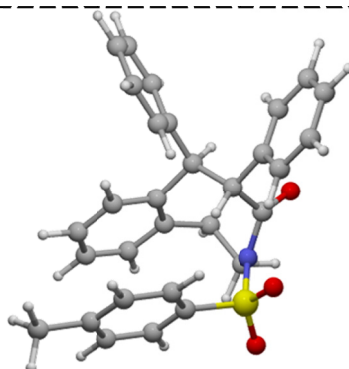

E= -1837.419198 Hartree

E<sub>SMD</sub>= -1838.050075 Hartree

---
