# Supplementary material for: Stereoselective synthesis of medium lactams enabled by metal-free hydroalkoxylation/stereospecific [1,3]-rearrangement
Source: PubMed Central journal article supplement (PMC6642132; doi:10.1038/s41467-019-11245-2), 2019-07-19
Supplement: 41467_2019_11245_MOESM6_ESM.pdf [file 41467_2019_11245_MOESM6_ESM.pdf]

Energy and imaginary vibrational frequency of calculated structures using  $\omega$ B97XD method.

---

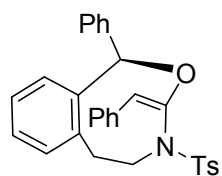

6a

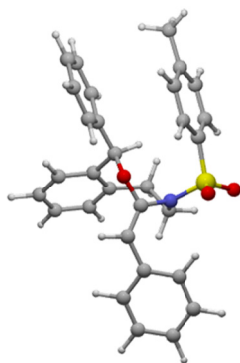

E= -1837.56529 Hartree

E<sub>SMD</sub>= -1838.150955 Hartree

---

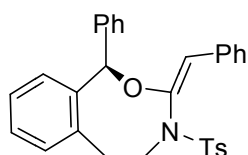

6a\_iso

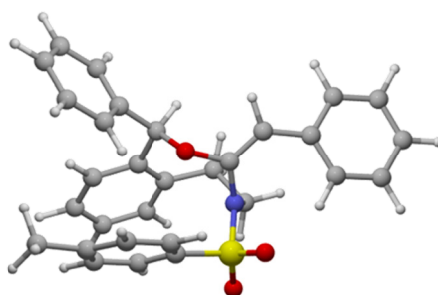

E= -1837.556936 Hartree

E<sub>SMD</sub>= -1838.142449 Hartree

---

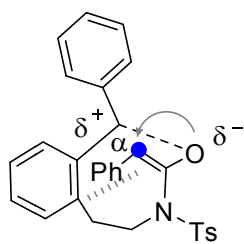

TS\_cis

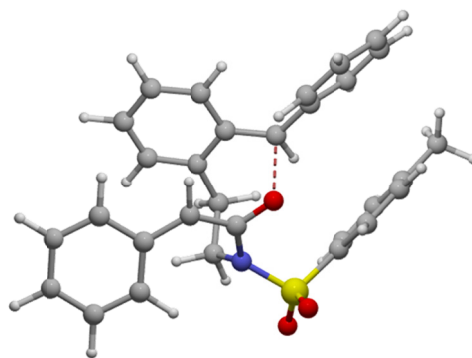

E= -1837.505693 Hartree

E<sub>SMD</sub>= -1838.093161 Hartree

Frequency= -257.46 cm<sup>-1</sup>

---

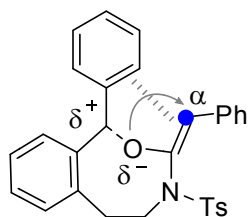

TS\_trans

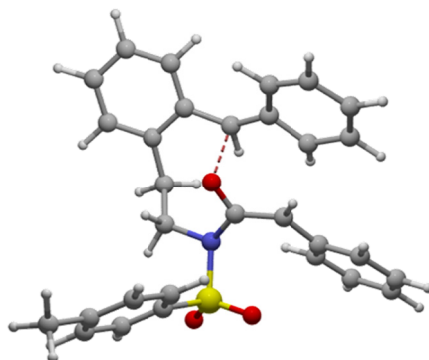

E= -1837.478131 Hartree

E<sub>SMD</sub>= -1838.071071 Hartree

Frequency= -274.00 cm<sup>-1</sup>

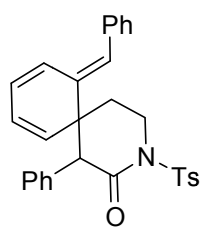

**Spiro\_Int**

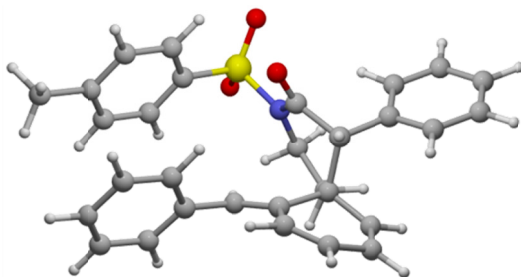

E= -1837.549305 Hartree

E<sub>SMD</sub>= -1838.135975 Hartree

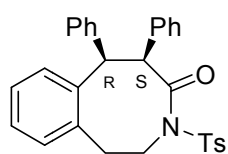

**2a\_cis**

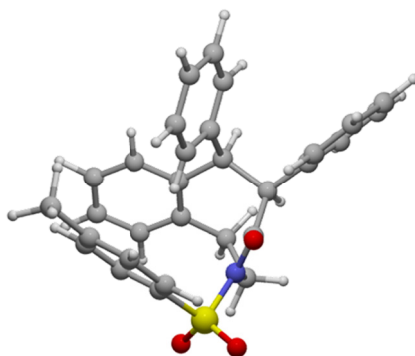

E= -1837.594085 Hartree

E<sub>SMD</sub>= -1838.178264 Hartree

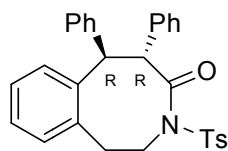

**2a\_trans**

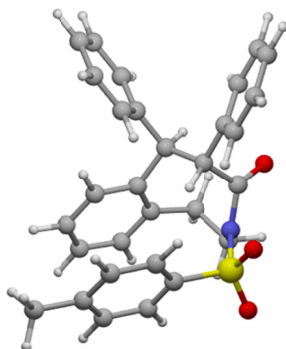

E= -1837.588939 Hartree

E<sub>SMD</sub>= -1838.178308 Hartree

---
