# Supplementary material for: Stereoselective synthesis of medium lactams enabled by metal-free hydroalkoxylation/stereospecific [1,3]-rearrangement
Source: PubMed Central journal article supplement (PMC6642132; doi:10.1038/s41467-019-11245-2), 2019-07-19
Supplement: 41467_2019_11245_MOESM7_ESM.pdf [file 41467_2019_11245_MOESM7_ESM.pdf]

## Molecular Geometries and Energies

### **B3LYP-D3 (SMD, chlorobenzene) for optimization, Cartesian Coordinates and Energies in Hartree**

Cartesian coordinates and imaginary frequency of the calculated structures using B3LYP-D3.

**6a**

Number of imaginary frequencies: 0

|   |            |            |            |
|---|------------|------------|------------|
| S | 0.8080682  | -2.7329816 | 0.1048134  |
| O | 0.0802292  | 0.1612214  | -1.1854726 |
| O | 1.1458012  | -3.1221016 | -1.2662316 |
| O | 1.2809852  | -3.4889256 | 1.2699694  |
| N | 1.3835422  | -1.1469946 | 0.3063054  |
| C | 1.3307512  | -0.2441256 | -0.7866026 |
| C | 2.4137742  | 0.2696324  | -1.3887576 |
| H | 2.2245472  | 1.1080024  | -2.0533036 |
| C | -0.7697518 | 0.6885364  | -0.1299896 |
| C | 3.8124172  | -0.1267246 | -1.1792026 |
| C | -0.0683558 | 1.8433394  | 0.5631424  |
| C | -0.9759278 | -2.6349846 | 0.2136994  |
| C | -1.5841388 | -2.6808626 | 1.4683474  |
| H | -0.9851008 | -2.8733876 | 2.3518264  |
| C | 4.2030332  | -1.4639616 | -0.9830126 |
| H | 3.4581502  | -2.2487786 | -1.0362316 |
| C | 0.7341872  | 1.6240474  | 1.7024594  |
| C | 0.9006282  | 0.2612044  | 2.3499764  |
| H | 1.2915742  | 0.4004884  | 3.3641874  |
| H | -0.0615248 | -0.2508996 | 2.4608744  |
| C | -3.7350798 | -2.2532036 | 0.4116234  |
| C | -2.9620868 | -2.4874006 | 1.5569954  |
| H | -3.4436418 | -2.5194536 | 2.5303174  |
| C | 1.8761352  | -0.6801476 | 1.6132264  |
| H | 2.0712032  | -1.5643266 | 2.2207534  |
| H | 2.8335332  | -0.1788036 | 1.4419764  |
| C | 5.5419862  | -1.7820046 | -0.7653626 |
| H | 5.8263792  | -2.8201456 | -0.6196766 |
| C | -1.7225198 | -2.4219296 | -0.9462986 |
| H | -1.2228158 | -2.3832576 | -1.9065626 |
| C | -0.1308828 | 3.1207644  | -0.0062556 |
| H | -0.7502878 | 3.2717114  | -0.8849156 |
| C | 4.8050392  | 0.8696764  | -1.1835456 |
| H | 4.5161822  | 1.9047854  | -1.3469766 |
| C | 0.5795452  | 4.1876314  | 0.5367874  |
| H | 0.5156482  | 5.1720204  | 0.0828594  |
| C | -3.0964478 | -2.2368336 | -0.8370006 |
| H | -3.6804178 | -2.0438856 | -1.7320306 |

|   |            |            |            |
|---|------------|------------|------------|
| C | 1.4399542  | 2.7113014  | 2.2382434  |
| H | 2.0571442  | 2.5550204  | 3.1193994  |
| C | 6.5161812  | -0.7807176 | -0.7485496 |
| H | 7.5586782  | -1.0346816 | -0.5800576 |
| C | 1.3697872  | 3.9801924  | 1.6678644  |
| H | 1.9267092  | 4.8028124  | 2.1069524  |
| C | 6.1429372  | 0.5473714  | -0.9646856 |
| H | 6.8938682  | 1.3323844  | -0.9644246 |
| C | -5.2167538 | -1.9899786 | 0.5058084  |
| H | -5.5961418 | -2.1626586 | 1.5163814  |
| H | -5.4307168 | -0.9505576 | 0.2328584  |
| H | -5.7779138 | -2.6298236 | -0.1832256 |
| H | -0.9490078 | -0.1122466 | 0.5915944  |
| C | -2.1081118 | 1.0369454  | -0.7455486 |
| C | -3.1761988 | 1.3359934  | 0.1095684  |
| C | -2.3162228 | 1.0472584  | -2.1265006 |
| C | -4.4353558 | 1.6341754  | -0.4065836 |
| H | -3.0156788 | 1.3310304  | 1.1845394  |
| C | -3.5808818 | 1.3404204  | -2.6443486 |
| H | -1.4911678 | 0.8091604  | -2.7869206 |
| C | -4.6433438 | 1.6321944  | -1.7893926 |
| H | -5.2542888 | 1.8669444  | 0.2682034  |
| H | -3.7327808 | 1.3402514  | -3.7199396 |
| H | -5.6250528 | 1.8602654  | -2.1939466 |

Energy (0K) = -1838.109717

Energy (0K) + ZPE = -1837.607638

Enthalpy (298K) = -1837.577256

Free Energy (298K) = -1837.669300

### 6a\_iso

Number of imaginary frequencies: 0

|   |            |            |            |
|---|------------|------------|------------|
| S | -1.2696695 | -2.1659772 | -0.9656824 |
| O | -0.3401605 | 0.9335508  | -0.7816244 |
| O | -1.7722955 | -1.8305582 | -2.3015054 |
| O | -1.7187825 | -3.3607442 | -0.2417584 |
| N | -1.6684845 | -0.8504162 | 0.0220486  |
| C | -1.6034985 | 0.4577928  | -0.5150684 |
| C | -2.6687625 | 1.2508408  | -0.7104584 |
| H | -2.4406255 | 2.2839048  | -0.9622994 |
| C | 0.4074685  | 1.4588428  | 0.3514136  |
| H | -0.2989075 | 2.0503908  | 0.9480806  |
| C | 1.0103125  | 0.3739538  | 1.2522876  |
| C | 2.3733655  | 0.0669308  | 1.1480946  |
| H | 2.9731415  | 0.5764438  | 0.4035926  |
| C | 2.9745015  | -0.8719212 | 1.9821246  |
| H | 4.0335005  | -1.0877082 | 1.8763116  |

|   |            |            |            |
|---|------------|------------|------------|
| C | 2.2125335  | -1.5280562 | 2.9462066  |
| H | 2.6689135  | -2.2574782 | 3.6089846  |
| C | 0.8538805  | -1.2412992 | 3.0529856  |
| H | 0.2544275  | -1.7544642 | 3.8011096  |
| C | 0.2330185  | -0.2988792 | 2.2223016  |
| C | -1.2605075 | -0.1027292 | 2.3602666  |
| H | -1.5543745 | 0.9319678  | 2.1569196  |
| H | -1.5733525 | -0.3147152 | 3.3885086  |
| C | -2.0584275 | -1.0325592 | 1.4284186  |
| H | -1.8793085 | -2.0774152 | 1.6849006  |
| H | -3.1331255 | -0.8422712 | 1.5321666  |
| C | -4.0880235 | 0.8992788  | -0.5605754 |
| C | -4.6005455 | -0.3640412 | -0.9082844 |
| H | -3.9429525 | -1.1017252 | -1.3513444 |
| C | -5.9523685 | -0.6486002 | -0.7274054 |
| H | -6.3322845 | -1.6275422 | -1.0048374 |
| C | -6.8188735 | 0.3170278  | -0.2090274 |
| H | -7.8718745 | 0.0893678  | -0.0714484 |
| C | -6.3258715 | 1.5821828  | 0.1160196  |
| H | -6.9933755 | 2.3444628  | 0.5075696  |
| C | -4.9748645 | 1.8714708  | -0.0649484 |
| H | -4.5939125 | 2.8574978  | 0.1892696  |
| C | 1.4413775  | 2.4154108  | -0.2103994 |
| C | 1.9000065  | 2.3123848  | -1.5269374 |
| H | 1.4798715  | 1.5528658  | -2.1747644 |
| C | 2.8814305  | 3.1858058  | -1.9999684 |
| H | 3.2281995  | 3.0987388  | -3.0257504 |
| C | 3.4129055  | 4.1684328  | -1.1639974 |
| H | 4.1744575  | 4.8482828  | -1.5345034 |
| C | 2.9557895  | 4.2763688  | 0.1515466  |
| H | 3.3597715  | 5.0410388  | 0.8085996  |
| C | 1.9762065  | 3.4043148  | 0.6234746  |
| H | 1.6287625  | 3.4832158  | 1.6506916  |
| C | 0.5153415  | -2.2447472 | -1.0837134 |
| C | 1.1753195  | -1.4547752 | -2.0262274 |
| H | 0.6047745  | -0.8041112 | -2.6772574 |
| C | 2.5619695  | -1.5248412 | -2.1109264 |
| H | 3.0832915  | -0.9070392 | -2.8370314 |
| C | 3.2968995  | -2.3778162 | -1.2748394 |
| C | 2.6037945  | -3.1749222 | -0.3558854 |
| H | 3.1568175  | -3.8467442 | 0.2944006  |
| C | 1.2165835  | -3.1122282 | -0.2490424 |
| H | 0.6797335  | -3.7300602 | 0.4610736  |
| C | 4.8039705  | -2.4005392 | -1.3303204 |
| H | 5.1755965  | -2.1517872 | -2.3284834 |
| H | 5.2032335  | -3.3796292 | -1.0501754 |

H 5.2240645 -1.6644282 -0.6328764  
Energy (0K) = -1838.102423  
Energy (0K) + ZPE = -1837.600672  
Enthalpy (298K) = -1837.570232  
Free Energy (298K) = -1837.662474

### TS\_cis

Number of imaginary frequencies: 1

|   |            |            |            |
|---|------------|------------|------------|
| S | 0.0864979  | -3.2216748 | -0.6200053 |
| O | 0.1033399  | -0.4557568 | -1.6586383 |
| O | 0.1694179  | -3.4238478 | -2.0616923 |
| O | 0.4269209  | -4.2881698 | 0.3289987  |
| N | 1.1780609  | -1.9425868 | -0.2370753 |
| C | 1.1086639  | -0.7428408 | -1.0054163 |
| C | 2.1867149  | 0.1994482  | -0.8122463 |
| H | 1.9257189  | 1.1715542  | -1.2149913 |
| C | -1.0276401 | 0.9630022  | 0.4410357  |
| C | 3.6181519  | -0.0749648 | -0.7827413 |
| C | 0.2074169  | 1.5118842  | 0.7114777  |
| C | -1.5566231 | -2.6465228 | -0.1994753 |
| C | -2.0300611 | -2.8512838 | 1.0970537  |
| H | -1.4215721 | -3.3863628 | 1.8176367  |
| C | 4.1808269  | -1.3692358 | -0.8575873 |
| H | 3.5287549  | -2.2294098 | -0.9636333 |
| C | 1.3174759  | 0.7131542  | 1.2594117  |
| C | 1.0614009  | -0.6546258 | 1.8918257  |
| H | 1.4799989  | -0.6471888 | 2.9047037  |
| H | -0.0084631 | -0.8407108 | 2.0062727  |
| C | -4.0984831 | -1.7226588 | 0.4899027  |
| C | -3.2985711 | -2.3790918 | 1.4344277  |
| H | -3.6751591 | -2.5338498 | 2.4418407  |
| C | 1.6874419  | -1.8388018 | 1.1436507  |
| H | 1.4703949  | -2.7792018 | 1.6497767  |
| H | 2.7741479  | -1.7362688 | 1.1150117  |
| C | 5.5598389  | -1.5477498 | -0.8362683 |
| H | 5.9680269  | -2.5519598 | -0.9039443 |
| C | -2.3302391 | -1.9956808 | -1.1616543 |
| H | -1.9253931 | -1.8298888 | -2.1509343 |
| C | 0.4924699  | 2.9011392  | 0.4127867  |
| H | -0.2828241 | 3.4889752  | -0.0643863 |
| C | 4.5025969  | 1.0250222  | -0.7264153 |
| H | 4.0916019  | 2.0287262  | -0.7158103 |
| C | 1.6571399  | 3.4966002  | 0.7961507  |
| H | 1.8171609  | 4.5524582  | 0.5995387  |
| C | -3.5955051 | -1.5411948 | -0.8075593 |
| H | -4.1957801 | -1.0141228 | -1.5430473 |

|   |            |            |            |
|---|------------|------------|------------|
| C | 2.4645429  | 1.4258452  | 1.7561387  |
| H | 3.2216289  | 0.8595412  | 2.2906947  |
| C | 6.4190889  | -0.4481948 | -0.7424463 |
| H | 7.4949489  | -0.5943878 | -0.7259583 |
| C | 2.6489769  | 2.7551152  | 1.5158577  |
| H | 3.5416409  | 3.2571612  | 1.8761357  |
| C | 5.8821039  | 0.8395162  | -0.6957623 |
| H | 6.5398649  | 1.7028082  | -0.6485513 |
| C | -5.4804111 | -1.2329618 | 0.8433917  |
| H | -5.6149281 | -1.1474868 | 1.9254237  |
| H | -5.6740891 | -0.2553588 | 0.3923437  |
| H | -6.2455441 | -1.9233418 | 0.4687127  |
| H | -1.2664311 | -0.0226798 | 0.8248797  |
| C | -2.1238851 | 1.6087112  | -0.2918483 |
| C | -3.4089231 | 1.6697122  | 0.2744067  |
| C | -1.9330871 | 2.1186312  | -1.5879233 |
| C | -4.4645571 | 2.2577072  | -0.4191433 |
| H | -3.5717501 | 1.2576422  | 1.2659037  |
| C | -2.9943361 | 2.6920432  | -2.2861653 |
| H | -0.9596201 | 2.0007932  | -2.0512783 |
| C | -4.2611651 | 2.7709092  | -1.7031083 |
| H | -5.4469131 | 2.3154822  | 0.0413377  |
| H | -2.8347471 | 3.0663982  | -3.2931533 |
| H | -5.0862761 | 3.2200812  | -2.2478703 |

Energy (0K) = -1838.064467

Energy (0K) + ZPE = -1837.565095

Enthalpy (298K) = -1837.534798

Free Energy (298K) = -1837.625178

### TS2\_trans

Number of imaginary frequencies: 1

|   |            |            |            |
|---|------------|------------|------------|
| S | -1.6775717 | -1.8843804 | -0.9421685 |
| O | 0.1925683  | 0.6276786  | 0.9017825  |
| O | -2.1011527 | -2.0328854 | -2.3368595 |
| O | -1.1055327 | -2.9970444 | -0.1902725 |
| N | -0.5469427 | -0.5611344 | -0.9159885 |
| C | 0.2853683  | -0.4312894 | 0.2719745  |
| C | 1.3012823  | -1.4068594 | 0.6023095  |
| H | 1.5093363  | -1.3858064 | 1.6660185  |
| C | 2.0680043  | 1.7061416  | -0.6501715 |
| C | 1.6904743  | -2.6236894 | -0.1028805 |
| C | 1.3588423  | 2.9428376  | -0.8594295 |
| C | -3.0698217 | -1.2589584 | 0.0032255  |
| C | -2.9230577 | -1.0815514 | 1.3813105  |
| H | -1.9877407 | -1.3324934 | 1.8686795  |
| C | 1.6441023  | -2.7528224 | -1.5074165 |

|   |            |            |            |
|---|------------|------------|------------|
| H | 1.2128433  | -1.9539694 | -2.1002375 |
| C | 0.1767083  | 2.8963896  | -1.6547725 |
| C | -0.3484417 | 1.6173756  | -2.2831755 |
| H | -0.9856197 | 1.9116266  | -3.1230745 |
| H | 0.4506153  | 1.0150546  | -2.7246665 |
| C | -5.2119647 | -0.2596044 | 1.4899035  |
| C | -3.9946537 | -0.5791874 | 2.1117795  |
| H | -3.8868367 | -0.4319684 | 3.1828615  |
| C | -1.2101877 | 0.7002936  | -1.3631415 |
| H | -2.0759087 | 0.3933746  | -1.9473275 |
| H | -1.5611267 | 1.2550496  | -0.4912225 |
| C | 2.1212523  | -3.8978764 | -2.1341975 |
| H | 2.0632063  | -3.9780014 | -3.2159485 |
| C | -4.2637967 | -0.9473404 | -0.6433525 |
| H | -4.3480617 | -1.0993314 | -1.7138315 |
| C | 1.7798993  | 4.1785326  | -0.3260345 |
| H | 2.7177293  | 4.2259166  | 0.2157565  |
| C | 2.2606863  | -3.6788734 | 0.6350845  |
| H | 2.3146353  | -3.5953474 | 1.7173305  |
| C | 1.0405363  | 5.3377016  | -0.5259395 |
| H | 1.3871353  | 6.2798906  | -0.1121565 |
| C | -5.3291777 | -0.4520174 | 0.1075115  |
| H | -6.2648737 | -0.2102374 | -0.3890905 |
| C | -0.5521177 | 4.0755166  | -1.8307705 |
| H | -1.4625037 | 4.0473746  | -2.4243815 |
| C | 2.6712673  | -4.9426054 | -1.3847145 |
| H | 3.0412513  | -5.8360774 | -1.8786145 |
| C | -0.1386097 | 5.2859886  | -1.2721175 |
| H | -0.7245777 | 6.1856896  | -1.4343705 |
| C | 2.7397773  | -4.8247444 | 0.0044205  |
| H | 3.1643443  | -5.6285454 | 0.5994385  |
| C | -6.3741617 | 0.2537786  | 2.3040785  |
| H | -6.0398407 | 0.9419016  | 3.0865215  |
| H | -7.1040977 | 0.7756556  | 1.6792675  |
| H | -6.8960367 | -0.5734334 | 2.8003325  |
| H | 1.8951353  | 0.9725576  | -1.4317825 |
| C | 2.8416393  | 1.2071186  | 0.3838985  |
| C | 3.2463593  | -0.1749754 | 0.2489925  |
| C | 3.1147613  | 1.8620016  | 1.6367935  |
| C | 4.1099083  | -0.7545624 | 1.2275715  |
| H | 3.2381923  | -0.6089834 | -0.7434365 |
| C | 3.8701073  | 1.2438056  | 2.5911185  |
| H | 2.6878353  | 2.8387056  | 1.8277745  |
| C | 4.4033843  | -0.0688794 | 2.3748185  |
| H | 4.4832703  | -1.7600034 | 1.0626985  |
| H | 4.0674233  | 1.7452836  | 3.5340065  |

H 5.0345303 -0.5177624 3.1362845  
Energy (0K) = -1838.042421  
Energy (0K) + ZPE = -1837.543506  
Enthalpy (298K) = -1837.512948  
Free Energy (298K) = -1837.605756

**spiro\_Int**

Number of imaginary frequencies: 0

|   |            |            |            |
|---|------------|------------|------------|
| S | -0.1817714 | -2.9338648 | 0.6192544  |
| O | 0.6126736  | -1.2373818 | -1.6201086 |
| O | 0.3903216  | -3.8933008 | -0.3194346 |
| O | -0.3289024 | -3.2630368 | 2.0417744  |
| N | 0.8476346  | -1.5224018 | 0.6364474  |
| C | 1.1600966  | -0.9214598 | -0.5766346 |
| C | 2.2279426  | 0.1618052  | -0.5258086 |
| H | 2.0736976  | 0.7415482  | -1.4383676 |
| C | -0.5888124 | 1.2349542  | 0.9718114  |
| C | 3.6388696  | -0.4171358 | -0.5654806 |
| C | 0.5483426  | 1.7375392  | 0.4285144  |
| C | -1.7654194 | -2.3662268 | 0.0226024  |
| C | -2.7036894 | -1.9150918 | 0.9527204  |
| H | -2.4554394 | -1.8938768 | 2.0075864  |
| C | 3.9577996  | -1.6907888 | -0.0727146 |
| H | 3.1819296  | -2.3399378 | 0.3163734  |
| C | 1.9366506  | 1.1315362  | 0.7046854  |
| C | 2.0533986  | 0.2739352  | 1.9790184  |
| H | 3.1204006  | 0.0989082  | 2.1385734  |
| H | 1.6938976  | 0.8484372  | 2.8379054  |
| C | -4.2875304 | -1.5722138 | -0.8583616 |
| C | -3.9581584 | -1.5163998 | 0.5022654  |
| H | -4.6873894 | -1.1444668 | 1.2150394  |
| C | 1.3492966  | -1.1032758 | 1.9652174  |
| H | 0.4934506  | -1.1055998 | 2.6414324  |
| H | 2.0326986  | -1.8693208 | 2.3410514  |
| C | 5.2704736  | -2.1646398 | -0.1162686 |
| H | 5.4913506  | -3.1569758 | 0.2656664  |
| C | -2.0599214 | -2.4312978 | -1.3394686 |
| H | -1.3048644 | -2.7723518 | -2.0352576 |
| C | 0.5262336  | 2.8721172  | -0.4923396 |
| H | -0.4212034 | 3.1707662  | -0.9238726 |
| C | 4.6672126  | 0.3520412  | -1.1324296 |
| H | 4.4319086  | 1.3290092  | -1.5413506 |
| C | 1.6265886  | 3.6342582  | -0.6923436 |
| H | 1.5696616  | 4.5183692  | -1.3203896 |
| C | -3.3231354 | -2.0326798 | -1.7661696 |
| H | -3.5635334 | -2.0760718 | -2.8248446 |

|   |            |            |            |
|---|------------|------------|------------|
| C | 3.0013846  | 2.2096952  | 0.7161484  |
| H | 3.9248856  | 1.9929742  | 1.2438714  |
| C | 6.2874966  | -1.3787048 | -0.6561986 |
| H | 7.3076366  | -1.7494878 | -0.6897996 |
| C | 2.8645676  | 3.3456272  | 0.0115394  |
| H | 3.6712546  | 4.0727312  | -0.0221246 |
| C | 5.9784386  | -0.1184748 | -1.1715236 |
| H | 6.7569226  | 0.4963192  | -1.6141786 |
| C | -5.6619204 | -1.1703608 | -1.3310816 |
| H | -6.0885234 | -0.3954708 | -0.6892896 |
| H | -5.6360394 | -0.7881338 | -2.3556736 |
| H | -6.3438574 | -2.0294108 | -1.3181966 |
| H | -0.5095474 | 0.5249022  | 1.7878154  |
| C | -1.9742454 | 1.5439772  | 0.5734364  |
| C | -2.9424434 | 1.8320312  | 1.5498474  |
| C | -2.3751534 | 1.4893982  | -0.7726006 |
| C | -4.2599784 | 2.1078472  | 1.1886964  |
| H | -2.6509884 | 1.8524342  | 2.5966664  |
| C | -3.6921524 | 1.7655032  | -1.1329396 |
| H | -1.6525714 | 1.1872962  | -1.5241356 |
| C | -4.6373194 | 2.0862102  | -0.1562276 |
| H | -4.9919754 | 2.3429672  | 1.9561004  |
| H | -3.9855844 | 1.7111322  | -2.1771326 |
| H | -5.6630494 | 2.3035722  | -0.4393136 |

Energy (0K) = -1838.090101

Energy (0K) + ZPE = -1837.588615

Enthalpy (298K) = -1837.557857

Free Energy (298K) = -1837.650523

## 2a\_cis

Number of imaginary frequencies: 0

|   |            |            |            |
|---|------------|------------|------------|
| S | 2.2383469  | -1.9791085 | -1.9081721 |
| O | -0.3179701 | -0.6530675 | -2.0968401 |
| O | 1.9563279  | -2.2167125 | -3.3207401 |
| O | 3.2800049  | -2.7474155 | -1.2157131 |
| N | 0.7956299  | -2.2743695 | -0.9464671 |
| C | -0.2965031 | -1.4361855 | -1.1606551 |
| C | -1.3639461 | -1.4814705 | -0.0716851 |
| H | -1.3848721 | -2.4875695 | 0.3343229  |
| C | -0.9669821 | -0.5198625 | 1.1419949  |
| H | -1.6849531 | -0.8099265 | 1.9210509  |
| C | 0.4376499  | -0.6899935 | 1.7740879  |
| C | 1.0259889  | 0.4431255  | 2.3629149  |
| H | 0.5111639  | 1.3931825  | 2.3044099  |
| C | 2.2541169  | 0.3961355  | 3.0182909  |
| H | 2.6617709  | 1.3020695  | 3.4573849  |



|   |            |            |            |
|---|------------|------------|------------|
| C | 2.9487329  | -0.8071275 | 3.1009439  |
| H | 3.9140979  | -0.8636195 | 3.5946179  |
| C | 2.3716439  | -1.9489685 | 2.5524549  |
| H | 2.8941599  | -2.8990035 | 2.6244589  |
| C | 1.1235729  | -1.9209595 | 1.9134579  |
| C | 0.5790729  | -3.2404035 | 1.4177779  |
| H | -0.4751101 | -3.3377465 | 1.6911929  |
| H | 1.0889149  | -4.0562695 | 1.9394099  |
| C | 0.7795479  | -3.4821805 | -0.1020761 |
| H | 1.7508729  | -3.9514875 | -0.2498421 |
| H | 0.0200169  | -4.1721785 | -0.4848911 |
| C | -2.7855351 | -1.2165405 | -0.5440651 |
| C | -3.1364121 | -0.2165455 | -1.4623301 |
| H | -2.3612281 | 0.3900165  | -1.9085551 |
| C | -4.4739621 | -0.0068955 | -1.7971601 |
| H | -4.7269811 | 0.7704275  | -2.5123491 |
| C | -5.4833101 | -0.7768215 | -1.2172031 |
| H | -6.5231871 | -0.6049595 | -1.4798581 |
| C | -5.1461641 | -1.7697485 | -0.2973001 |
| H | -5.9198951 | -2.3791285 | 0.1607949  |
| C | -3.8076111 | -1.9856355 | 0.0299719  |
| H | -3.5531221 | -2.7643635 | 0.7463629  |
| C | -1.2756971 | 0.9280325  | 0.7791879  |
| C | -0.4622721 | 1.6494515  | -0.1074881 |
| H | 0.4302149  | 1.1943895  | -0.5120941 |
| C | -0.7886321 | 2.9538485  | -0.4706711 |
| H | -0.1473071 | 3.4862245  | -1.1672821 |
| C | -1.9324041 | 3.5651405  | 0.0493819  |
| H | -2.1879301 | 4.5816375  | -0.2356441 |
| C | -2.7431891 | 2.8604875  | 0.9387849  |
| H | -3.6351091 | 3.3239585  | 1.3500709  |
| C | -2.4140921 | 1.5521815  | 1.2985619  |
| H | -3.0618361 | 1.0020385  | 1.9757509  |
| C | 2.5458089  | -0.2416195 | -1.6351081 |
| C | 2.2106609  | 0.6791325  | -2.6272381 |
| H | 1.7648949  | 0.3321475  | -3.5507121 |
| C | 2.4269169  | 2.0325285  | -2.3817121 |
| H | 2.1620989  | 2.7602355  | -3.1435601 |
| C | 2.9561229  | 2.4719265  | -1.1592681 |
| C | 3.2985639  | 1.5167275  | -0.1921311 |
| H | 3.7065929  | 1.8371855  | 0.7614289  |
| C | 3.0990529  | 0.1583485  | -0.4190951 |
| H | 3.3486169  | -0.5728455 | 0.3400989  |
| C | 3.0986339  | 3.9439355  | -0.8633901 |
| H | 3.9617099  | 4.1438485  | -0.2216861 |
| H | 2.2078899  | 4.3099375  | -0.3374591 |

H 3.2068049 4.5324265 -1.7787271  
Energy (0K) = -1838.133234  
Energy (0K) + ZPE = -1837.629862  
Enthalpy (298K) = -1837.599901  
Free Energy (298K) = -1837.688727

## 2a\_trans

Number of imaginary frequencies: 0

|   |            |            |            |
|---|------------|------------|------------|
| S | 1.7628666  | -2.8071184 | -0.4082512 |
| O | -1.1978124 | -2.8117234 | 1.8283208  |
| O | 0.7601856  | -3.3028874 | -1.3545492 |
| O | 2.9021656  | -3.6070524 | 0.0433478  |
| N | 0.8896826  | -2.4359884 | 0.9984358  |
| C | -0.5198814 | -2.2730944 | 0.9785618  |
| C | -1.0497154 | -1.1507864 | 0.1041078  |
| H | -0.3711624 | -0.9677784 | -0.7270902 |
| C | -0.9878834 | 0.1210746  | 1.0606678  |
| H | -1.3930934 | -0.2125514 | 2.0211138  |
| C | 0.4458026  | 0.6431416  | 1.3314408  |
| C | 0.8993446  | 1.7650396  | 0.6184528  |
| H | 0.2624506  | 2.1999556  | -0.1411672 |
| C | 2.1269646  | 2.3681396  | 0.8767918  |
| H | 2.4261446  | 3.2426896  | 0.3064698  |
| C | 2.9509296  | 1.8571886  | 1.8750778  |
| H | 3.9044106  | 2.3239646  | 2.1042508  |
| C | 2.5366246  | 0.7278366  | 2.5728258  |
| H | 3.1803716  | 0.3121656  | 3.3445518  |
| C | 1.3063476  | 0.1007266  | 2.3217848  |
| C | 1.0268376  | -1.1711044 | 3.1004008  |
| H | -0.0336874 | -1.2823344 | 3.3388478  |
| H | 1.5557946  | -1.1431624 | 4.0586568  |
| C | 1.5024196  | -2.4289044 | 2.3378298  |
| H | 2.5849396  | -2.4154744 | 2.2054808  |
| H | 1.2329086  | -3.3403954 | 2.8780958  |
| C | -2.4223144 | -1.4866284 | -0.4408832 |
| C | -2.5565894 | -1.7947364 | -1.7985702 |
| H | -1.6757284 | -1.7921444 | -2.4352982 |
| C | -3.8015484 | -2.1232154 | -2.3358482 |
| H | -3.8881494 | -2.3597324 | -3.3923972 |
| C | -4.9290974 | -2.1516754 | -1.5149312 |
| H | -5.9007484 | -2.4037454 | -1.9296472 |
| C | -4.8005204 | -1.8599164 | -0.1551822 |
| H | -5.6724154 | -1.8876294 | 0.4919008  |
| C | -3.5557664 | -1.5331464 | 0.3792948  |
| H | -3.4619464 | -1.3169964 | 1.4370298  |
| C | -1.9116724 | 1.2336846  | 0.5806828  |

|   |            |            |            |
|---|------------|------------|------------|
| C | -2.0551054 | 1.5647616  | -0.7736502 |
| H | -1.5186484 | 0.9972936  | -1.5270112 |
| C | -2.8925754 | 2.6065056  | -1.1698972 |
| H | -2.9948064 | 2.8417966  | -2.2252782 |
| C | -3.6043784 | 3.3372386  | -0.2169252 |
| H | -4.2616374 | 4.1446386  | -0.5257272 |
| C | -3.4697224 | 3.0175466  | 1.1343378  |
| H | -4.0212844 | 3.5760106  | 1.8851018  |
| C | -2.6299614 | 1.9744026  | 1.5256908  |
| H | -2.5296444 | 1.7303256  | 2.5803198  |
| C | 2.4190736  | -1.2813414 | -1.0778512 |
| C | 1.8045116  | -0.6976454 | -2.1866382 |
| H | 0.9471686  | -1.1801174 | -2.6417242 |
| C | 2.3294306  | 0.4820836  | -2.7089912 |
| H | 1.8547876  | 0.9397926  | -3.5724272 |
| C | 3.4623806  | 1.0806726  | -2.1437642 |
| C | 4.0754596  | 0.4542216  | -1.0497492 |
| H | 4.9605896  | 0.9002246  | -0.6059532 |
| C | 3.5649276  | -0.7219744 | -0.5122322 |
| H | 4.0522966  | -1.2070484 | 0.3250478  |
| C | 3.9936426  | 2.3893816  | -2.6713452 |
| H | 5.0849826  | 2.4343006  | -2.6099322 |
| H | 3.5997166  | 3.2257386  | -2.0802912 |
| H | 3.7013346  | 2.5555046  | -3.7117152 |

Energy (0K) = -1838.128214

Energy (0K) + ZPE = -1837.625559

Enthalpy (298K) = -1837.595255

Free Energy (298K) = -1837.686549

### **M062X (SMD, chlorobenzene) for optimization, Cartesian Coordinates and Energies in Hartree**

**Cartesian coordinates and imaginary frequency of the calculated structures using M062X.**

**6a\_1**

Number of imaginary frequencies: 0

|   |            |            |            |
|---|------------|------------|------------|
| S | -0.8114095 | -2.7001692 | 0.0617514  |
| O | -0.0637075 | 0.1484848  | -1.2105536 |
| O | -1.1133115 | -3.0716902 | -1.3096066 |
| O | -1.3074055 | -3.4625132 | 1.1974324  |
| N | -1.3846295 | -1.1391892 | 0.2660944  |
| C | -1.3193585 | -0.2306822 | -0.8209696 |
| C | -2.3953885 | 0.2983788  | -1.4087506 |
| H | -2.2092985 | 1.1287888  | -2.0841666 |
| C | 0.7659095  | 0.6683898  | -0.1554716 |
| C | -3.7909295 | -0.1072072 | -1.1684926 |
| C | 0.0685435  | 1.8344358  | 0.5175074  |

|   |            |            |            |
|---|------------|------------|------------|
| C | 0.9560105  | -2.6025992 | 0.2104444  |
| C | 1.5290685  | -2.6387112 | 1.4793114  |
| H | 0.9081185  | -2.8469172 | 2.3454004  |
| C | -4.1635005 | -1.4534672 | -1.0603536 |
| H | -3.4120705 | -2.2249902 | -1.1970406 |
| C | -0.7558405 | 1.6262508  | 1.6371174  |
| C | -0.9328875 | 0.2731778  | 2.2985244  |
| H | -1.3431335 | 0.4328548  | 3.3013104  |
| H | 0.0290375  | -0.2344372 | 2.4348644  |
| C | 3.6866705  | -2.1510782 | 0.4790224  |
| C | 2.8939665  | -2.4078162 | 1.6036004  |
| H | 3.3537515  | -2.4244742 | 2.5880814  |
| C | -1.8931985 | -0.6737522 | 1.5618724  |
| H | -2.0893625 | -1.5600962 | 2.1668364  |
| H | -2.8512695 | -0.1752182 | 1.3773324  |
| C | -5.4897685 | -1.7952472 | -0.8193006 |
| H | -5.7659055 | -2.8421022 | -0.7422336 |
| C | 1.7210315  | -2.3694642 | -0.9271476 |
| H | 1.2413075  | -2.3344482 | -1.8995396 |
| C | 0.1557995  | 3.1040608  | -0.0555336 |
| H | 0.7991855  | 3.2443758  | -0.9199686 |
| C | -4.7775825 | 0.8801848  | -1.0553336 |
| H | -4.4946285 | 1.9255108  | -1.1473656 |
| C | -0.5573295 | 4.1760468  | 0.4664464  |
| H | -0.4739495 | 5.1580738  | 0.0123534  |
| C | 3.0860915  | -2.1487122 | -0.7818006 |
| H | 3.6882215  | -1.9244672 | -1.6582336 |
| C | -1.4653675 | 2.7165308  | 2.1502044  |
| H | -2.1011035 | 2.5668728  | 3.0192554  |
| C | -6.4618575 | -0.8053802 | -0.6904796 |
| H | -7.4960215 | -1.0769642 | -0.5038116 |
| C | -1.3738605 | 3.9790728  | 1.5760444  |
| H | -1.9339385 | 4.8072188  | 1.9987774  |
| C | -6.1027085 | 0.5342788  | -0.8138006 |
| H | -6.8553715 | 1.3110458  | -0.7216556 |
| C | 5.1620165  | -1.8883702 | 0.6246334  |
| H | 5.3731165  | -1.3297692 | 1.5403994  |
| H | 5.5384175  | -1.3106802 | -0.2225786 |
| H | 5.7209105  | -2.8287032 | 0.6732434  |
| H | 0.9287805  | -0.1252842 | 0.5814964  |
| C | 2.1141535  | 0.9945548  | -0.7547706 |
| C | 3.1873945  | 1.2240098  | 0.1091934  |
| C | 2.3245575  | 1.0221528  | -2.1312126 |
| C | 4.4587235  | 1.4679498  | -0.3953146 |
| H | 3.0214915  | 1.1946508  | 1.1840404  |
| C | 3.6016545  | 1.2648678  | -2.6371616 |

|   |           |           |            |
|---|-----------|-----------|------------|
| H | 1.4916585 | 0.8322528 | -2.7986766 |
| C | 4.6706335 | 1.4830638 | -1.7744176 |
| H | 5.2868835 | 1.6390538 | 0.2857934  |
| H | 3.7593105 | 1.2795708 | -3.7111226 |
| H | 5.6636755 | 1.6684388 | -2.1715196 |

Energy (0K) = -1837.399649

Energy (0K) + ZPE = -1836.892903

Enthalpy (298K) = -1836.862931

Free Energy (298K) = -1836.953723

### 6a\_iso\_1

Number of imaginary frequencies: 0

|   |            |            |            |
|---|------------|------------|------------|
| S | -1.3910716 | -2.3831359 | -0.3725636 |
| O | -0.1136126 | 0.5989301  | -0.6767476 |
| O | -2.1664286 | -2.5120399 | -1.5991416 |
| O | -1.5701756 | -3.3261679 | 0.7214254  |
| N | -1.6750116 | -0.8716819 | 0.2908424  |
| C | -1.4348986 | 0.2926701  | -0.4781256 |
| C | -2.3825386 | 1.1216751  | -0.9329596 |
| H | -2.0142276 | 2.0481211  | -1.3688876 |
| C | 0.5489344  | 1.3379301  | 0.3666204  |
| H | -0.1390446 | 2.1288531  | 0.6985434  |
| C | 0.9330294  | 0.4767301  | 1.5769364  |
| C | 2.2695844  | 0.1118321  | 1.7693884  |
| H | 3.0171474  | 0.4461781  | 1.0580654  |
| C | 2.6626874  | -0.6810699 | 2.8421244  |
| H | 3.7086624  | -0.9453199 | 2.9634794  |
| C | 1.7123844  | -1.1280719 | 3.7531304  |
| H | 2.0016614  | -1.7481169 | 4.5955384  |
| C | 0.3836114  | -0.7572559 | 3.5840894  |
| H | -0.3635686 | -1.0926109 | 4.2993764  |
| C | -0.0246606 | 0.0485011  | 2.5172134  |
| C | -1.4983766 | 0.3622161  | 2.4083604  |
| H | -1.6738496 | 1.3310941  | 1.9306774  |
| H | -1.9356216 | 0.4237221  | 3.4099744  |
| C | -2.2521506 | -0.7222269 | 1.6316584  |
| H | -2.1569636 | -1.6875469 | 2.1317664  |
| H | -3.3167856 | -0.4692939 | 1.5565724  |
| C | -3.8436996 | 0.9699081  | -0.8373536 |
| C | -4.4922016 | -0.2705739 | -0.9138546 |
| H | -3.9136526 | -1.1699819 | -1.0971116 |
| C | -5.8761426 | -0.3424259 | -0.7961406 |
| H | -6.3655656 | -1.3089489 | -0.8630386 |
| C | -6.6342076 | 0.8116481  | -0.6119586 |
| H | -7.7140166 | 0.7472071  | -0.5232356 |
| C | -6.0002966 | 2.0500301  | -0.5581726 |

|   |            |            |            |
|---|------------|------------|------------|
| H | -6.5819136 | 2.9571631  | -0.4277916 |
| C | -4.6174636 | 2.1269431  | -0.6767706 |
| H | -4.1233486 | 3.0943441  | -0.6365776 |
| C | 1.7473374  | 1.9929461  | -0.2850126 |
| C | 2.3450764  | 1.4180671  | -1.4068486 |
| H | 1.9100814  | 0.5216851  | -1.8373586 |
| C | 3.4837594  | 1.9963191  | -1.9623856 |
| H | 3.9398564  | 1.5471811  | -2.8397466 |
| C | 4.0329414  | 3.1471741  | -1.4028546 |
| H | 4.9189494  | 3.5971661  | -1.8390456 |
| C | 3.4362184  | 3.7223891  | -0.2836226 |
| H | 3.8549424  | 4.6225851  | 0.1547764  |
| C | 2.2982604  | 3.1460101  | 0.2727574  |
| H | 1.8378424  | 3.5903991  | 1.1520384  |
| C | 0.3161694  | -2.3617729 | -0.8538566 |
| C | 0.6370494  | -2.2146339 | -2.1985946 |
| H | -0.1576936 | -2.1423799 | -2.9329906 |
| C | 1.9779254  | -2.1605259 | -2.5630726 |
| H | 2.2446734  | -2.0416979 | -3.6095956 |
| C | 2.9882124  | -2.2446539 | -1.6005386 |
| C | 2.6292744  | -2.4146689 | -0.2602136 |
| H | 3.4045434  | -2.4860129 | 0.4978804  |
| C | 1.2961584  | -2.4703399 | 0.1253114  |
| H | 1.0191584  | -2.5778169 | 1.1711814  |
| C | 4.4363444  | -2.1001679 | -1.9867226 |
| H | 4.5951644  | -2.3367439 | -3.0410286 |
| H | 5.0754854  | -2.7514589 | -1.3857116 |
| H | 4.7660604  | -1.0682759 | -1.8200946 |

Energy (0K) = -1837.390928

Energy (0K) + ZPE = -1836.884233

Enthalpy (298K) = -1836.854229

Free Energy (298K) = -1836.945075

### TS\_cis\_1

Number of imaginary frequencies: 1

|   |            |            |            |
|---|------------|------------|------------|
| S | 0.4138892  | -2.9364738 | -0.5850790 |
| O | -0.0668198 | -0.0506928 | -1.3445250 |
| O | 0.5140722  | -3.0401388 | -2.0281290 |
| O | 0.8861322  | -3.9920758 | 0.3004010  |
| N | 1.2614942  | -1.5638138 | -0.1519060 |
| C | 1.1453092  | -0.4026408 | -0.9881960 |
| C | 2.2327322  | 0.3503022  | -1.2776100 |
| H | 2.0133092  | 1.3274552  | -1.7003220 |
| C | -0.9893548 | 0.7776762  | 0.1732210  |
| C | 3.6388292  | 0.0048312  | -1.0589450 |
| C | 0.0789572  | 1.5831922  | 0.7498420  |

|   |            |            |            |
|---|------------|------------|------------|
| C | -1.2931338 | -2.6458708 | -0.1702070 |
| C | -1.7208268 | -2.9001048 | 1.1281550  |
| H | -1.0405838 | -3.3578338 | 1.8400720  |
| C | 4.1181272  | -1.3079508 | -1.1904830 |
| H | 3.4309872  | -2.0932968 | -1.4902130 |
| C | 1.0382362  | 0.9933662  | 1.6057890  |
| C | 0.9693522  | -0.4423898 | 2.0808690  |
| H | 1.3904592  | -0.4864968 | 3.0912120  |
| H | -0.0621498 | -0.7987348 | 2.1588810  |
| C | -3.9003688 | -2.0027298 | 0.5526670  |
| C | -3.0257318 | -2.5664228 | 1.4848030  |
| H | -3.3710968 | -2.7534458 | 2.4977920  |
| C | 1.7805152  | -1.4158468 | 1.2093060  |
| H | 1.7923262  | -2.4091908 | 1.6610910  |
| H | 2.8188002  | -1.0724198 | 1.1427000  |
| C | 5.4581612  | -1.5925958 | -0.9598050 |
| H | 5.8155582  | -2.6115768 | -1.0698140 |
| C | -2.1474858 | -2.1004528 | -1.1246410 |
| H | -1.7726358 | -1.8982358 | -2.1215220 |
| C | 0.2474612  | 2.9195212  | 0.3465040  |
| H | -0.4935468 | 3.3669002  | -0.3077170 |
| C | 4.5428232  | 1.0200602  | -0.7160110 |
| H | 4.1771802  | 2.0398332  | -0.6230180 |
| C | 1.3301922  | 3.6677902  | 0.7772170  |
| H | 1.4380182  | 4.6994552  | 0.4596690  |
| C | -3.4474658 | -1.7861528 | -0.7541650 |
| H | -4.1178268 | -1.3352138 | -1.4813990 |
| C | 2.1202732  | 1.7702462  | 2.0334870  |
| H | 2.8583472  | 1.3214522  | 2.6933520  |
| C | 6.3449442  | -0.5778218 | -0.6013500 |
| H | 7.3912542  | -0.8051598 | -0.4238810 |
| C | 2.2740112  | 3.0877322  | 1.6263630  |
| H | 3.1262992  | 3.6647432  | 1.9715570  |
| C | 5.8836282  | 0.7304312  | -0.4841480 |
| H | 6.5694382  | 1.5278252  | -0.2147610 |
| C | -5.3115528 | -1.6358868 | 0.9289760  |
| H | -5.4454138 | -1.6183398 | 2.0128600  |
| H | -5.5711598 | -0.6507448 | 0.5292800  |
| H | -6.0239678 | -2.3557978 | 0.5140460  |
| H | -1.2441818 | -0.1376678 | 0.7042980  |
| C | -2.1531858 | 1.3848812  | -0.5177730 |
| C | -3.3779098 | 1.4196492  | 0.1572340  |
| C | -2.0628228 | 1.9214452  | -1.8044470 |
| C | -4.4923888 | 2.0018962  | -0.4375290 |
| H | -3.4547988 | 0.9845782  | 1.1510290  |
| C | -3.1841638 | 2.4891622  | -2.4024300 |

|   |            |           |            |
|---|------------|-----------|------------|
| H | -1.1189058 | 1.8474362 | -2.3326490 |
| C | -4.3978518 | 2.5349692 | -1.7215950 |
| H | -5.4353058 | 2.0353282 | 0.0998080  |
| H | -3.1091838 | 2.8920902 | -3.4072760 |
| H | -5.2692998 | 2.9799662 | -2.1909380 |

Energy (0K) = -1837.339143

Energy (0K) + ZPE = -1836.854219

Enthalpy (298K) = -1836.824325

Free Energy (298K) = -1836.914356

### TS2\_trans\_1

Number of imaginary frequencies: 1

|   |            |            |            |
|---|------------|------------|------------|
| S | -2.3473593 | 2.0164131  | -0.5773750 |
| O | 0.1914917  | 0.0143411  | 0.4411470  |
| O | -2.6751623 | 2.7219771  | -1.8086180 |
| O | -3.3772363 | 1.5676781  | 0.3394020  |
| N | -1.4789663 | 0.6465621  | -1.0485140 |
| C | -1.0155743 | -0.1827099 | 0.0654970  |
| C | -1.8233973 | -1.1544949 | 0.6068720  |
| H | -1.3597073 | -1.6345279 | 1.4668250  |
| C | 1.4230387  | -1.7348409 | -0.4767980 |
| C | -3.1376023 | -1.6622449 | 0.2458690  |
| C | 2.1891837  | -1.1720479 | -1.5597540 |
| C | -1.1967903 | 3.0214401  | 0.3339080  |
| C | -0.9450243 | 2.7186321  | 1.6698970  |
| H | -1.4778563 | 1.9028741  | 2.1477610  |
| C | -3.8868453 | -1.2825149 | -0.8854120 |
| H | -3.5054313 | -0.5162439 | -1.5473270 |
| C | 1.5222177  | -0.5893429 | -2.6721440 |
| C | 0.0307387  | -0.3879019 | -2.7026060 |
| H | -0.3015943 | -0.3723359 | -3.7437440 |
| H | -0.5015923 | -1.2182929 | -2.2263380 |
| C | 0.6663207  | 4.5316971  | 1.7410460  |
| C | -0.0131023 | 3.4789731  | 2.3629730  |
| H | 0.1938497  | 3.2531751  | 3.4052860  |
| C | -0.3958113 | 0.9290131  | -2.0050990 |
| H | -0.7851273 | 1.6355771  | -2.7378620 |
| H | 0.4588447  | 1.3768251  | -1.4860810 |
| C | -5.1068263 | -1.8848809 | -1.1582870 |
| H | -5.6658093 | -1.5749269 | -2.0359090 |
| C | -0.5344813 | 4.0589961  | -0.3126320 |
| H | -0.7660943 | 4.2761151  | -1.3503720 |
| C | 3.5966377  | -1.2772279 | -1.5808700 |
| H | 4.0997257  | -1.7883829 | -0.7680120 |
| C | -3.6771623 | -2.6613689 | 1.0782760  |
| H | -3.1141543 | -2.9677929 | 1.9563600  |



|   |            |            |            |
|---|------------|------------|------------|
| C | 4.3341587  | -0.7971019 | -2.6488600 |
| H | 5.4139957  | -0.8986389 | -2.6521070 |
| C | 0.3953697  | 4.8094931  | 0.3992840  |
| H | 0.9153277  | 5.6269771  | -0.0924180 |
| C | 2.2893167  | -0.1165399 | -3.7348670 |
| H | 1.7837687  | 0.3360801  | -4.5833010 |
| C | -5.6253223 | -2.8704949 | -0.3188180 |
| H | -6.5842463 | -3.3292139 | -0.5377910 |
| C | 3.6777147  | -0.2075489 | -3.7286640 |
| H | 4.2469157  | 0.1685191  | -4.5729270 |
| C | -4.9012733 | -3.2552999 | 0.8063530  |
| H | -5.2905093 | -4.0186409 | 1.4730300  |
| C | 1.6494267  | 5.3699661  | 2.5160360  |
| H | 2.1625117  | 4.7764581  | 3.2764690  |
| H | 2.4013027  | 5.8096011  | 1.8566620  |
| H | 1.1368917  | 6.1906861  | 3.0285830  |
| H | 0.4252467  | -2.0957179 | -0.7130370 |
| C | 1.9235497  | -2.1867809 | 0.7977450  |
| C | 1.2749297  | -3.2660339 | 1.4240760  |
| C | 2.9669227  | -1.5305059 | 1.4788270  |
| C | 1.6965397  | -3.7164429 | 2.6681760  |
| H | 0.4476377  | -3.7528099 | 0.9152640  |
| C | 3.3730727  | -1.9756289 | 2.7260920  |
| H | 3.4087357  | -0.6409789 | 1.0426280  |
| C | 2.7502737  | -3.0770829 | 3.3172030  |
| H | 1.1998507  | -4.5599439 | 3.1356020  |
| H | 4.1679117  | -1.4565009 | 3.2511800  |
| H | 3.0766417  | -3.4240879 | 4.2922140  |

Energy (0K) = -1837.313697

Energy (0K) + ZPE = -1836.813307

Enthalpy (298K) = -1836.783055

Free Energy (298K) = -1836.875291

### **spiro\_Int\_1**

Number of imaginary frequencies: 0

|   |            |            |            |
|---|------------|------------|------------|
| S | -0.1362226 | -2.8324229 | 0.5831324  |
| O | 0.5630704  | -1.1287009 | -1.6358906 |
| O | 0.4026754  | -3.7694299 | -0.3807176 |
| O | -0.2478376 | -3.1894569 | 1.9900414  |
| N | 0.8759504  | -1.4508949 | 0.5961224  |
| C | 1.1621814  | -0.8437839 | -0.6206016 |
| C | 2.2468484  | 0.2154451  | -0.5708936 |
| H | 2.1227034  | 0.7936301  | -1.4916606 |
| C | -0.5783956 | 1.1940791  | 0.9541294  |
| C | 3.6428264  | -0.3957529 | -0.5600466 |
| C | 0.5253554  | 1.7217201  | 0.3856954  |

|   |            |            |            |
|---|------------|------------|------------|
| C | -1.7256956 | -2.2700319 | 0.0413284  |
| C | -2.6221586 | -1.8051259 | 0.9981844  |
| H | -2.3236086 | -1.7491859 | 2.0402984  |
| C | 3.8765984  | -1.7361939 | -0.2343726 |
| H | 3.0491844  | -2.4044849 | -0.0155476 |
| C | 1.9316114  | 1.1740761  | 0.6473684  |
| C | 2.0688424  | 0.3415181  | 1.9296244  |
| H | 3.1382524  | 0.2685521  | 2.1468884  |
| H | 1.6104744  | 0.8877801  | 2.7591694  |
| C | -4.2915946 | -1.5628109 | -0.7404146 |
| C | -3.9024826 | -1.4447939 | 0.5948554  |
| H | -4.6087746 | -1.0636939 | 1.3263044  |
| C | 1.5124574  | -1.0989389 | 1.8783694  |
| H | 0.7587394  | -1.2483569 | 2.6518104  |
| H | 2.3161964  | -1.8129209 | 2.0818604  |
| C | 5.1706284  | -2.2528169 | -0.2326676 |
| H | 5.3259864  | -3.2970729 | 0.0183954  |
| C | -2.0788136 | -2.3911989 | -1.2996946 |
| H | -1.3475706 | -2.7542189 | -2.0123046 |
| C | 0.4465224  | 2.8350681  | -0.5668716 |
| H | -0.5122116 | 3.0690651  | -1.0144286 |
| C | 4.7368004  | 0.3959631  | -0.9323856 |
| H | 4.5665494  | 1.4233501  | -1.2377546 |
| C | 1.5069524  | 3.6366601  | -0.7776096 |
| H | 1.4190714  | 4.4996691  | -1.4296666 |
| C | -3.3655806 | -2.0342669 | -1.6780966 |
| H | -3.6604786 | -2.1233409 | -2.7201066 |
| C | 2.9428754  | 2.2990001  | 0.6546774  |
| H | 3.8679564  | 2.1357381  | 1.2010014  |
| C | 6.2518564  | -1.4451049 | -0.5648386 |
| H | 7.2587834  | -1.8496979 | -0.5636206 |
| C | 2.7544914  | 3.4181661  | -0.0552356 |
| H | 3.5201374  | 4.1877781  | -0.0840416 |
| C | 6.0281414  | -0.1190119 | -0.9260886 |
| H | 6.8601384  | 0.5143171  | -1.2174476 |
| C | -5.6895996 | -1.2026579 | -1.1676786 |
| H | -6.1899146 | -0.5996009 | -0.4068156 |
| H | -5.6805516 | -0.6353449 | -2.1026986 |
| H | -6.2862686 | -2.1053039 | -1.3357376 |
| H | -0.4667936 | 0.4761931  | 1.7650614  |
| C | -1.9740496 | 1.4772151  | 0.5562354  |
| C | -2.9341856 | 1.8216321  | 1.5138384  |
| C | -2.3707576 | 1.3370161  | -0.7790756 |
| C | -4.2516216 | 2.0660751  | 1.1394324  |
| H | -2.6386096 | 1.9094421  | 2.5558634  |
| C | -3.6861236 | 1.5888441  | -1.1534706 |

|   |            |           |            |
|---|------------|-----------|------------|
| H | -1.6427786 | 0.9930991 | -1.5101576 |
| C | -4.6291656 | 1.9595821 | -0.1976306 |
| H | -4.9834436 | 2.3453671 | 1.8913154  |
| H | -3.9796176 | 1.4752311 | -2.1930996 |
| H | -5.6559506 | 2.1553421 | -0.4916336 |

Energy (0K) = -1837.381669

Energy (0K) + ZPE = -1836.875649

Enthalpy (298K) = -1836.846456

Free Energy (298K) = -1836.932646

## 2a\_cis\_1

Number of imaginary frequencies: 0

|   |            |            |            |
|---|------------|------------|------------|
| S | 2.2054711  | -1.8942884 | -1.9532599 |
| O | -0.3295299 | -0.5878574 | -2.1042869 |
| O | 1.9156851  | -2.0782114 | -3.3602349 |
| O | 3.2514431  | -2.6741324 | -1.3074319 |
| N | 0.8027591  | -2.2238304 | -1.0073469 |
| C | -0.2982749 | -1.3894404 | -1.1945639 |
| C | -1.3526989 | -1.4847264 | -0.1052879 |
| H | -1.3728179 | -2.5117864 | 0.2484231  |
| C | -0.9459089 | -0.5702184 | 1.1271761  |
| H | -1.6561039 | -0.8774764 | 1.9084861  |
| C | 0.4641281  | -0.7446334 | 1.7330771  |
| C | 1.0524601  | 0.3714466  | 2.3454051  |
| H | 0.5358141  | 1.3231676  | 2.3159651  |
| C | 2.2804581  | 0.3053396  | 2.9948261  |
| H | 2.6885731  | 1.1981346  | 3.4586771  |
| C | 2.9738811  | -0.8967964 | 3.0433621  |
| H | 3.9391811  | -0.9670884 | 3.5340741  |
| C | 2.3970361  | -2.0213664 | 2.4660681  |
| H | 2.9163491  | -2.9749414 | 2.5105101  |
| C | 1.1502411  | -1.9737284 | 1.8355361  |
| C | 0.6002171  | -3.2750114 | 1.3091011  |
| H | -0.4480989 | -3.3838724 | 1.5991781  |
| H | 1.1250821  | -4.1006324 | 1.7978141  |
| C | 0.7825991  | -3.4611224 | -0.2149229 |
| H | 1.7487181  | -3.9323954 | -0.3914749 |
| H | 0.0115931  | -4.1268704 | -0.6161999 |
| C | -2.7741739 | -1.1932544 | -0.5516579 |
| C | -3.1269899 | -0.1696024 | -1.4371789 |
| H | -2.3534979 | 0.4429796  | -1.8829319 |
| C | -4.4658159 | 0.0613786  | -1.7389879 |
| H | -4.7241169 | 0.8578786  | -2.4296779 |
| C | -5.4702629 | -0.7079174 | -1.1580559 |
| H | -6.5120319 | -0.5169924 | -1.3956819 |
| C | -5.1294849 | -1.7222104 | -0.2693619 |

|   |            |            |            |
|---|------------|------------|------------|
| H | -5.9010379 | -2.3314534 | 0.1906531  |
| C | -3.7903789 | -1.9600884 | 0.0249231  |
| H | -3.5282479 | -2.7574224 | 0.7180711  |
| C | -1.2603159 | 0.8798416  | 0.7948041  |
| C | -0.4358969 | 1.6266896  | -0.0548409 |
| H | 0.4828351  | 1.1948666  | -0.4391569 |
| C | -0.7810719 | 2.9259276  | -0.4097129 |
| H | -0.1330599 | 3.4839806  | -1.0801589 |
| C | -1.9506159 | 3.5027396  | 0.0836141  |
| H | -2.2199269 | 4.5163586  | -0.1960919 |
| C | -2.7686569 | 2.7725266  | 0.9390131  |
| H | -3.6811869 | 3.2108756  | 1.3300371  |
| C | -2.4221259 | 1.4697646  | 1.2902511  |
| H | -3.0771539 | 0.8922356  | 1.9379591  |
| C | 2.5005911  | -0.1772184 | -1.6277489 |
| C | 2.1663271  | 0.7678476  | -2.5905029 |
| H | 1.7233601  | 0.4430686  | -3.5251149 |
| C | 2.3847741  | 2.1108986  | -2.3046459 |
| H | 2.1261841  | 2.8639336  | -3.0437729 |
| C | 2.9177441  | 2.5087526  | -1.0743669 |
| C | 3.2557031  | 1.5289846  | -0.1352629 |
| H | 3.6708671  | 1.8236776  | 0.8246051  |
| C | 3.0531731  | 0.1810686  | -0.4022249 |
| H | 3.3072591  | -0.5801384 | 0.3297571  |
| C | 3.0903431  | 3.9674146  | -0.7423099 |
| H | 4.0466661  | 4.1492376  | -0.2453439 |
| H | 2.2971871  | 4.2969666  | -0.0624029 |
| H | 3.0447781  | 4.5887436  | -1.6391639 |

Energy (0K) = -1837.424244

Energy (0K) + ZPE = -1836.916473

Enthalpy (298K) = -1836.886808

Free Energy (298K) = -1836.974938

## 2a\_trans\_1

Number of imaginary frequencies: 0

|   |            |            |            |
|---|------------|------------|------------|
| S | 1.6764615  | -2.7863852 | -0.3461979 |
| O | -1.2780335 | -2.7352672 | 1.8478041  |
| O | 0.6750685  | -3.2440252 | -1.2963139 |
| O | 2.7815555  | -3.6135312 | 0.1021541  |
| N | 0.8145125  | -2.4067672 | 1.0347501  |
| C | -0.5900025 | -2.2208512 | 1.0023171  |
| C | -1.0985575 | -1.1064842 | 0.1093601  |
| H | -0.4102965 | -0.9487932 | -0.7236199 |
| C | -1.0266175 | 0.1581588  | 1.0470121  |
| H | -1.4507765 | -0.1523572 | 2.0099531  |
| C | 0.4147415  | 0.6458708  | 1.3165251  |

|   |            |            |            |
|---|------------|------------|------------|
| C | 0.8991085  | 1.7286408  | 0.5706331  |
| H | 0.2736415  | 2.1562828  | -0.2047339 |
| C | 2.1403725  | 2.3024228  | 0.8156361  |
| H | 2.4667235  | 3.1487748  | 0.2186121  |
| C | 2.9422315  | 1.8021658  | 1.8333501  |
| H | 3.9057895  | 2.2511008  | 2.0542431  |
| C | 2.4964165  | 0.7069598  | 2.5598441  |
| H | 3.1229775  | 0.2944748  | 3.3476441  |
| C | 1.2538425  | 0.1083418  | 2.3194181  |
| C | 0.9420775  | -1.1391672 | 3.1184561  |
| H | -0.1238735 | -1.2324932 | 3.3421521  |
| H | 1.4621675  | -1.0991502 | 4.0801701  |
| C | 1.4092755  | -2.4051662 | 2.3757301  |
| H | 2.4945805  | -2.4069982 | 2.2549041  |
| H | 1.1178145  | -3.3102272 | 2.9150281  |
| C | -2.4677645 | -1.4533662 | -0.4313169 |
| C | -2.5658275 | -1.9561602 | -1.7287599 |
| H | -1.6601755 | -2.0844272 | -2.3174219 |
| C | -3.8021865 | -2.3162152 | -2.2569489 |
| H | -3.8649365 | -2.7054972 | -3.2681309 |
| C | -4.9526305 | -2.1811612 | -1.4862419 |
| H | -5.9189405 | -2.4582012 | -1.8955649 |
| C | -4.8587735 | -1.6938172 | -0.1847349 |
| H | -5.7521825 | -1.5934612 | 0.4233381  |
| C | -3.6229835 | -1.3350842 | 0.3418781  |
| H | -3.5578075 | -0.9556202 | 1.3568611  |
| C | -1.9027275 | 1.2962568  | 0.5468901  |
| C | -2.0856555 | 1.5625648  | -0.8122929 |
| H | -1.6258115 | 0.9168748  | -1.5561749 |
| C | -2.8635175 | 2.6391558  | -1.2265479 |
| H | -2.9991985 | 2.8276108  | -2.2867639 |
| C | -3.4741025 | 3.4655298  | -0.2867839 |
| H | -4.0854845 | 4.3018938  | -0.6096429 |
| C | -3.2995525 | 3.2082298  | 1.0696001  |
| H | -3.7729495 | 3.8440968  | 1.8110431  |
| C | -2.5185335 | 2.1317358  | 1.4794821  |
| H | -2.3794685 | 1.9355248  | 2.5400021  |
| C | 2.3793615  | -1.2938872 | -1.0105449 |
| C | 1.7929795  | -0.7059432 | -2.1268359 |
| H | 0.9147505  | -1.1608802 | -2.5737909 |
| C | 2.3689425  | 0.4385528  | -2.6678149 |
| H | 1.9174775  | 0.9044038  | -3.5389529 |
| C | 3.5260215  | 0.9890788  | -2.1144849 |
| C | 4.1044885  | 0.3638598  | -1.0051329 |
| H | 5.0065805  | 0.7828568  | -0.5674649 |
| C | 3.5426075  | -0.7756682 | -0.4477119 |

|   |           |            |            |
|---|-----------|------------|------------|
| H | 4.0073105 | -1.2709472 | 0.3984541  |
| C | 4.1611005 | 2.2205538  | -2.7040229 |
| H | 5.0669385 | 1.9610468  | -3.2609919 |
| H | 4.4506235 | 2.9242588  | -1.9184579 |
| H | 3.4808245 | 2.7307248  | -3.3888469 |

Energy (0K) = -1837.419198

Energy (0K) + ZPE = -1836.912260

Enthalpy (298K) = -1836.882292

Free Energy (298K) = -1836.972245

### **ωB97XD (SMD, chlorobenzene) for optimization, Cartesian Coordinates and Energies in Hartree**

**Cartesian coordinates and imaginary frequency of the calculated structures using ωB97XD.**

#### **6a\_2**

Number of imaginary frequencies: 0

|   |            |            |            |
|---|------------|------------|------------|
| S | 0.8144175  | -2.7191396 | 0.0485937  |
| O | 0.0706875  | 0.1545364  | -1.2196933 |
| O | 1.1094565  | -3.0840706 | -1.3259273 |
| O | 1.3225255  | -3.4863566 | 1.1749307  |
| N | 1.3759975  | -1.1523946 | 0.2571687  |
| C | 1.3181725  | -0.2399526 | -0.8259953 |
| C | 2.3953865  | 0.2852844  | -1.4138593 |
| H | 2.2093395  | 1.1167014  | -2.0871773 |
| C | -0.7641105 | 0.6781914  | -0.1732003 |
| C | 3.7943925  | -0.1066926 | -1.1759253 |
| C | -0.0654565 | 1.8338314  | 0.5159957  |
| C | -0.9539555 | -2.6272686 | 0.2135267  |
| C | -1.5202705 | -2.6671256 | 1.4832407  |
| H | -0.8966905 | -2.8675956 | 2.3480827  |
| C | 4.1877095  | -1.4461916 | -1.0656753 |
| H | 3.4499025  | -2.2299556 | -1.1984533 |
| C | 0.7359145  | 1.6148124  | 1.6496537  |
| C | 0.9012835  | 0.2534004  | 2.2956277  |
| H | 1.3030545  | 0.3958974  | 3.3043277  |
| H | -0.0640185 | -0.2497826 | 2.4193587  |
| C | -3.6907575 | -2.2021546 | 0.5036967  |
| C | -2.8872625 | -2.4517696 | 1.6189617  |
| H | -3.3363705 | -2.4769646 | 2.6074227  |
| C | 1.8657655  | -0.6906936 | 1.5591517  |
| H | 2.0528755  | -1.5786576 | 2.1635737  |
| H | 2.8281145  | -0.1957866 | 1.3946877  |
| C | 5.5171855  | -1.7685796 | -0.8182473 |
| H | 5.8061335  | -2.8115206 | -0.7350163 |
| C | -1.7343895 | -2.4023336 | -0.9166333 |
| H | -1.2680265 | -2.3638306 | -1.8937223 |

|   |            |            |            |
|---|------------|------------|------------|
| C | -0.1345005 | 3.1074994  | -0.0495703 |
| H | -0.7558105 | 3.2580504  | -0.9272703 |
| C | 4.7673355  | 0.8937074  | -1.0614813 |
| H | 4.4724255  | 1.9352304  | -1.1568643 |
| C | 0.5703165  | 4.1726194  | 0.4944097  |
| H | 0.5011515  | 5.1572424  | 0.0436617  |
| C | -3.0969015 | -2.1942636 | -0.7616483 |
| H | -3.7055415 | -1.9824486 | -1.6356783 |
| C | 1.4372805  | 2.6988514  | 2.1858147  |
| H | 2.0553095  | 2.5428304  | 3.0659887  |
| C | 6.4743595  | -0.7658756 | -0.6880763 |
| H | 7.5119305  | -1.0217426 | -0.4979713 |
| C | 1.3604475  | 3.9652894  | 1.6203367  |
| H | 1.9129905  | 4.7890124  | 2.0611057  |
| C | 6.0962745  | 0.5680174  | -0.8157993 |
| H | 6.8376815  | 1.3557934  | -0.7253853 |
| C | -5.1661115 | -1.9388166 | 0.6450577  |
| H | -5.4603505 | -1.8550456 | 1.6938427  |
| H | -5.4350125 | -1.0079596 | 0.1368517  |
| H | -5.7515585 | -2.7457946 | 0.1929627  |
| H | -0.9432365 | -0.1174506 | 0.5561177  |
| C | -2.1059845 | 1.0193034  | -0.7788643 |
| C | -3.1548015 | 1.3602164  | 0.0775287  |
| C | -2.3370535 | 0.9608024  | -2.1500803 |
| C | -4.4198795 | 1.6289904  | -0.4288553 |
| H | -2.9757415 | 1.4099944  | 1.1483307  |
| C | -3.6079625 | 1.2248474  | -2.6578083 |
| H | -1.5246595 | 0.6894344  | -2.8134583 |
| C | -4.6523885 | 1.5553864  | -1.8016163 |
| H | -5.2263725 | 1.8939134  | 0.2480017  |
| H | -3.7793865 | 1.1691124  | -3.7283003 |
| H | -5.6412575 | 1.7594154  | -2.1997563 |

Energy (0K) = -1837.56529

Energy (0K) + ZPE = -1837.056472

Enthalpy (298K) = -1837.026540

Free Energy (298K) = -1837.117719

## 6a\_iso\_2

Number of imaginary frequencies: 0

|   |            |            |            |
|---|------------|------------|------------|
| S | -1.4057028 | -2.3892733 | -0.4271886 |
| O | -0.1228368 | 0.5994257  | -0.6852396 |
| O | -2.1575228 | -2.4782803 | -1.6713696 |
| O | -1.6202248 | -3.3536603 | 0.6405154  |
| N | -1.6842878 | -0.8855243 | 0.2583514  |
| C | -1.4417378 | 0.2911877  | -0.4898496 |
| C | -2.3871038 | 1.1278567  | -0.9319366 |

|   |            |            |            |
|---|------------|------------|------------|
| H | -2.0189418 | 2.0593317  | -1.3554916 |
| C | 0.5437392  | 1.3311567  | 0.3587304  |
| H | -0.1467128 | 2.1138407  | 0.7020244  |
| C | 0.9392442  | 0.4647607  | 1.5614704  |
| C | 2.2785532  | 0.1111077  | 1.7471744  |
| H | 3.0197882  | 0.4538477  | 1.0350114  |
| C | 2.6843622  | -0.6794233 | 2.8148724  |
| H | 3.7335562  | -0.9323193 | 2.9307964  |
| C | 1.7432832  | -1.1395043 | 3.7271004  |
| H | 2.0424282  | -1.7604173 | 4.5654934  |
| C | 0.4107562  | -0.7829633 | 3.5639474  |
| H | -0.3284358 | -1.1300373 | 4.2812294  |
| C | -0.0105298 | 0.0216757  | 2.5022704  |
| C | -1.4880528 | 0.3198527  | 2.3988514  |
| H | -1.6739648 | 1.2964207  | 1.9418104  |
| H | -1.9271008 | 0.3621287  | 3.4005444  |
| C | -2.2400968 | -0.7552203 | 1.6076974  |
| H | -2.1397318 | -1.7262563 | 2.0941464  |
| H | -3.3063838 | -0.5071593 | 1.5509814  |
| C | -3.8486368 | 0.9789297  | -0.8304596 |
| C | -4.5037528 | -0.2492373 | -0.9850576 |
| H | -3.9310188 | -1.1358723 | -1.2337516 |
| C | -5.8854398 | -0.3263973 | -0.8493436 |
| H | -6.3790338 | -1.2849073 | -0.9743756 |
| C | -6.6347518 | 0.8130537  | -0.5688206 |
| H | -7.7128458 | 0.7447087  | -0.4634436 |
| C | -5.9946618 | 2.0418347  | -0.4357076 |
| H | -6.5697148 | 2.9386547  | -0.2275396 |
| C | -4.6140108 | 2.1234647  | -0.5720376 |
| H | -4.1170868 | 3.0843227  | -0.4670096 |
| C | 1.7307402  | 2.0048687  | -0.2952526 |
| C | 2.3424712  | 1.4387277  | -1.4135516 |
| H | 1.9293602  | 0.5321647  | -1.8407806 |
| C | 3.4706322  | 2.0344577  | -1.9691966 |
| H | 3.9375722  | 1.5880567  | -2.8420786 |
| C | 3.9963312  | 3.1982877  | -1.4147476 |
| H | 4.8756292  | 3.6620907  | -1.8502606 |
| C | 3.3846412  | 3.7679907  | -0.3014976 |
| H | 3.7851042  | 4.6777787  | 0.1343164  |
| C | 2.2568052  | 3.1727837  | 0.2547694  |
| H | 1.7875382  | 3.6138257  | 1.1304864  |
| C | 0.3133522  | -2.3846803 | -0.8739526 |
| C | 0.6650732  | -2.1718453 | -2.2020176 |
| H | -0.1102948 | -2.0524773 | -2.9496836 |
| C | 2.0109552  | -2.1085693 | -2.5390736 |
| H | 2.2937052  | -1.9341943 | -3.5732556 |



|   |           |            |            |
|---|-----------|------------|------------|
| C | 3.0035482 | -2.2501063 | -1.5655836 |
| C | 2.6170362 | -2.4961173 | -0.2460506 |
| H | 3.3748492 | -2.6132823 | 0.5226164  |
| C | 1.2770992 | -2.5602763 | 0.1105074  |
| H | 0.9866812 | -2.7215753 | 1.1435474  |
| C | 4.4577672 | -2.0814553 | -1.9174256 |
| H | 4.6474002 | -2.3153653 | -2.9679436 |
| H | 5.0966182 | -2.7194863 | -1.3013626 |
| H | 4.7639962 | -1.0427103 | -1.7469246 |

Energy (0K) = -1837.556936

Energy (0K) + ZPE = -1837.047952

Enthalpy (298K) = -1837.018339

Free Energy (298K) = -1837.107346

### TS\_cis\_2

Number of imaginary frequencies: 1

|   |            |            |            |
|---|------------|------------|------------|
| S | 0.1289303  | -3.0995856 | -0.8012533 |
| O | -0.0704917 | -0.2290976 | -1.4799803 |
| O | 0.1550673  | -3.1719496 | -2.2472283 |
| O | 0.5216603  | -4.2322006 | 0.0260107  |
| N | 1.1640023  | -1.8473906 | -0.3565283 |
| C | 1.0657353  | -0.6031466 | -1.0833343 |
| C | 2.1808453  | 0.2161144  | -1.1818043 |
| H | 1.9319943  | 1.2121274  | -1.5345203 |
| C | -1.0453617 | 0.9120794  | 0.3719207  |
| C | 3.5905133  | -0.0450306 | -0.9743023 |
| C | 0.1752433  | 1.4669054  | 0.7945987  |
| C | -1.5174527 | -2.6404956 | -0.2871043 |
| C | -1.9218827 | -2.9157656 | 1.0146037  |
| H | -1.2677217 | -3.4710846 | 1.6781857  |
| C | 4.1639153  | -1.3305696 | -0.9325273 |
| H | 3.5335533  | -2.1982316 | -1.0964353 |
| C | 1.1449333  | 0.6713714  | 1.4842287  |
| C | 0.9037003  | -0.7615556 | 1.9024187  |
| H | 1.2861813  | -0.8836316 | 2.9218477  |
| H | -0.1592947 | -1.0061676 | 1.9420987  |
| C | -4.0277317 | -1.7953206 | 0.5750037  |
| C | -3.1732817 | -2.4807106 | 1.4416787  |
| H | -3.4915847 | -2.6851466 | 2.4600307  |
| C | 1.6345753  | -1.7938926 | 1.0285167  |
| H | 1.5204023  | -2.7918716 | 1.4528447  |
| H | 2.7055883  | -1.5717736 | 1.0235107  |
| C | 5.5236373  | -1.4907626 | -0.7108283 |
| H | 5.9465773  | -2.4902846 | -0.6880043 |
| C | -2.3547997 | -1.9717206 | -1.1737003 |
| H | -2.0064617 | -1.7528236 | -2.1747573 |

|   |            |            |            |
|---|------------|------------|------------|
| C | 0.5203483  | 2.8131334  | 0.4774797  |
| H | -0.2054167 | 3.4239814  | -0.0474803 |
| C | 4.4440653  | 1.0626004  | -0.8182953 |
| H | 4.0213533  | 2.0609634  | -0.8820903 |
| C | 1.7180273  | 3.3601014  | 0.8670037  |
| H | 1.9420923  | 4.3959454  | 0.6354247  |
| C | -3.6042397 | -1.5584366 | -0.7368913 |
| H | -4.2524737 | -1.0131236 | -1.4162523 |
| C | 2.3442063  | 1.2715474  | 1.8961947  |
| H | 3.0641093  | 0.6730544  | 2.4467327  |
| C | 6.3505423  | -0.3817566 | -0.5292913 |
| H | 7.4135433  | -0.5161306 | -0.3569693 |
| C | 2.6388853  | 2.5839214  | 1.5926537  |
| H | 3.5784113  | 3.0171034  | 1.9193827  |
| C | 5.8046093  | 0.8963464  | -0.5915163 |
| H | 6.4413943  | 1.7675854  | -0.4714243 |
| C | -5.3879537 | -1.3315266 | 1.0264057  |
| H | -5.4362017 | -1.2187276 | 2.1126307  |
| H | -5.6429547 | -0.3721276 | 0.5668097  |
| H | -6.1594167 | -2.0512486 | 0.7329907  |
| H | -1.3605857 | -0.0294556 | 0.8095367  |
| C | -2.1012577 | 1.6115584  | -0.3644993 |
| C | -3.3897077 | 1.6454854  | 0.1846387  |
| C | -1.8737147 | 2.2183214  | -1.6051233 |
| C | -4.4189877 | 2.3086464  | -0.4706533 |
| H | -3.5764597 | 1.1539264  | 1.1350487  |
| C | -2.9105507 | 2.8656314  | -2.2667703 |
| H | -0.8966547 | 2.1114584  | -2.0625163 |
| C | -4.1810617 | 2.9209154  | -1.6993443 |
| H | -5.4080157 | 2.3449974  | -0.0245393 |
| H | -2.7291167 | 3.3184344  | -3.2360733 |
| H | -4.9878107 | 3.4284884  | -2.2183943 |

Energy (0K) = -1837.505693

Energy (0K) + ZPE = -1837.000231

Enthalpy (298K) = -1836.970468

Free Energy (298K) = -1837.059350

### **TS2\_trans\_2**

Number of imaginary frequencies: 1

|   |            |            |            |
|---|------------|------------|------------|
| S | -1.4461653 | -2.1024544 | -0.9952154 |
| O | 0.1329417  | 0.7218936  | 0.6512086  |
| O | -1.9140763 | -2.3247254 | -2.3532234 |
| O | -0.7129183 | -3.1205004 | -0.2740154 |
| N | -0.5015653 | -0.6734794 | -1.0411244 |
| C | 0.3274257  | -0.3862674 | 0.1166906  |
| C | 1.4207247  | -1.1968444 | 0.5218336  |

|   |            |            |            |
|---|------------|------------|------------|
| H | 1.6530267  | -1.0406184 | 1.5693616  |
| C | 1.6979257  | 1.9331576  | -0.6044894 |
| C | 2.0084007  | -2.3823394 | -0.1020444 |
| C | 0.8302847  | 3.0707536  | -0.8147984 |
| C | -2.8494713 | -1.6422624 | 0.0054786  |
| C | -2.6673613 | -1.4595244 | 1.3746476  |
| H | -1.6937943 | -1.6236764 | 1.8236016  |
| C | 2.0227167  | -2.5873824 | -1.4914824 |
| H | 1.4879087  | -1.8982824 | -2.1374524 |
| C | -0.2960743 | 2.8667776  | -1.6500064 |
| C | -0.5937863 | 1.5481536  | -2.3399064 |
| H | -1.2423103 | 1.7809316  | -3.1896474 |
| H | 0.3017077  | 1.1017256  | -2.7815444 |
| C | -5.0110323 | -0.8662474 | 1.5808136  |
| C | -3.7489633 | -1.0684324 | 2.1499846  |
| H | -3.6125103 | -0.9173124 | 3.2167366  |
| C | -1.3293113 | 0.4731106  | -1.5000944 |
| H | -2.0934783 | 0.0405576  | -2.1445114 |
| H | -1.8190193 | 0.9414516  | -0.6427854 |
| C | 2.6893277  | -3.6710944 | -2.0432634 |
| H | 2.6746477  | -3.8164344 | -3.1190284 |
| C | -4.0903543 | -1.4469864 | -0.5867504 |
| H | -4.2057923 | -1.6028884 | -1.6537404 |
| C | 1.0556337  | 4.3345126  | -0.2522674 |
| H | 1.9575577  | 4.5072826  | 0.3240166  |
| C | 2.7113507  | -3.2884064 | 0.7032886  |
| H | 2.7234427  | -3.1375314 | 1.7794136  |
| C | 0.1648217  | 5.3771546  | -0.4615044 |
| H | 0.3549967  | 6.3496346  | -0.0196704 |
| C | -5.1653023 | -1.0629344 | 0.2075036  |
| H | -6.1390513 | -0.9124734 | -0.2494314 |
| C | -1.1791123 | 3.9281506  | -1.8376364 |
| H | -2.0529673 | 3.7823806  | -2.4668354 |
| C | 3.3727377  | -4.5715364 | -1.2276434 |
| H | 3.8903877  | -5.4202344 | -1.6629334 |
| C | -0.9649273 | 5.1692916  | -1.2458884 |
| H | -1.6713093 | 5.9760526  | -1.4130594 |
| C | 3.3816317  | -4.3730204 | 0.1489956  |
| H | 3.9114387  | -5.0655944 | 0.7959966  |
| C | -6.1817913 | -0.4706194 | 2.4425136  |
| H | -5.8811053 | 0.2402476  | 3.2167286  |
| H | -6.9782063 | -0.0139354 | 1.8500116  |
| H | -6.6033093 | -1.3472554 | 2.9458846  |
| H | 1.6471837  | 1.2116646  | -1.4138044 |
| C | 2.6307297  | 1.5684706  | 0.3556146  |
| C | 3.2457507  | 0.2959566  | 0.1420036  |

|   |           |            |            |
|---|-----------|------------|------------|
| C | 2.8378017 | 2.2102316  | 1.6209026  |
| C | 4.2002217 | -0.1955444 | 1.0727796  |
| H | 3.2362677 | -0.1284734 | -0.8547594 |
| C | 3.7017257 | 1.6772266  | 2.5299626  |
| H | 2.2744137 | 3.1023526  | 1.8658196  |
| C | 4.4123927 | 0.4736256  | 2.2444606  |
| H | 4.7159667 | -1.1243684 | 0.8550246  |
| H | 3.8495267 | 2.1655006  | 3.4876996  |
| H | 5.1220487 | 0.0914326  | 2.9715826  |

Energy (0K) = -1837.478131

Energy (0K) + ZPE = -1836.972473

Enthalpy (298K) = -1836.942599

Free Energy (298K) = -1837.032761

### **spiro\_Int\_2**

Number of imaginary frequencies: 0

|   |            |            |            |
|---|------------|------------|------------|
| S | -0.1402223 | -2.9268116 | 0.5561159  |
| O | 0.6255867  | -1.2093636 | -1.6527381 |
| O | 0.3978907  | -3.8579456 | -0.4125531 |
| O | -0.2541483 | -3.2967396 | 1.9588179  |
| N | 0.8739777  | -1.5385836 | 0.5875809  |
| C | 1.1780437  | -0.9127026 | -0.6127611 |
| C | 2.2329067  | 0.1769634  | -0.5397701 |
| H | 2.0850647  | 0.7594984  | -1.4524041 |
| C | -0.6051633 | 1.1723064  | 0.9359629  |
| C | 3.6488837  | -0.3854486 | -0.5648071 |
| C | 0.5195247  | 1.6985154  | 0.4133859  |
| C | -1.7288453 | -2.3466526 | 0.0217779  |
| C | -2.6294513 | -1.9042316 | 0.9862669  |
| H | -2.3427843 | -1.8889086 | 2.0318219  |
| C | 3.9611707  | -1.6799076 | -0.1404631 |
| H | 3.1791647  | -2.3562686 | 0.1870039  |
| C | 1.9123077  | 1.1184644  | 0.6875719  |
| C | 2.0259687  | 0.2619924  | 1.9569489  |
| H | 3.0932697  | 0.1438394  | 2.1607639  |
| H | 1.6012647  | 0.8112904  | 2.8017539  |
| C | -4.2823843 | -1.5670096 | -0.7515131 |
| C | -3.8999523 | -1.5112156 | 0.5902299  |
| H | -4.6034073 | -1.1492606 | 1.3332959  |
| C | 1.4082367  | -1.1508296 | 1.9048859  |
| H | 0.5862857  | -1.2364946 | 2.6160609  |
| H | 2.1550287  | -1.8867806 | 2.2142859  |
| C | 5.2739147  | -2.1429166 | -0.1737021 |
| H | 5.4895037  | -3.1545536 | 0.1546839  |
| C | -2.0768833 | -2.4048396 | -1.3237451 |
| H | -1.3514803 | -2.7442606 | -2.0518421 |

|   |            |            |            |
|---|------------|------------|------------|
| C | 0.4787097  | 2.8465814  | -0.4988561 |
| H | -0.4658653 | 3.1082244  | -0.9600911 |
| C | 4.6834907  | 0.4168834  | -1.0587421 |
| H | 4.4536227  | 1.4119244  | -1.4252101 |
| C | 1.5521987  | 3.6395414  | -0.6622711 |
| H | 1.4876997  | 4.5257934  | -1.2852751 |
| C | -3.3551023 | -2.0140216 | -1.6971791 |
| H | -3.6377603 | -2.0573986 | -2.7449941 |
| C | 2.9445477  | 2.2245244  | 0.7340039  |
| H | 3.8654337  | 2.0254414  | 1.2738189  |
| C | 6.2969287  | -1.3242396 | -0.6366071 |
| H | 7.3191277  | -1.6878716 | -0.6637111 |
| C | 2.7853957  | 3.3713044  | 0.0639359  |
| H | 3.5682057  | 4.1234134  | 0.0678909  |
| C | 5.9946857  | -0.0423306 | -1.0871181 |
| H | 6.7798297  | 0.6002344  | -1.4731011 |
| C | -5.6767213 | -1.1796476 | -1.1657951 |
| H | -6.1087103 | -0.4620756 | -0.4644941 |
| H | -5.6845833 | -0.7293406 | -2.1618911 |
| H | -6.3285973 | -2.0596516 | -1.1945731 |
| H | -0.5265763 | 0.4230354  | 1.7184119  |
| C | -1.9879163 | 1.4974114  | 0.5273449  |
| C | -2.9459143 | 1.8587914  | 1.4796149  |
| C | -2.3765133 | 1.3901364  | -0.8125781 |
| C | -4.2514703 | 2.1474554  | 1.0974759  |
| H | -2.6595643 | 1.9266074  | 2.5254139  |
| C | -3.6798123 | 1.6846614  | -1.1950981 |
| H | -1.6540693 | 1.0407714  | -1.5442021 |
| C | -4.6193083 | 2.0712354  | -0.2436551 |
| H | -4.9811603 | 2.4394904  | 1.8461859  |
| H | -3.9660723 | 1.5924874  | -2.2382021 |
| H | -5.6374323 | 2.2994814  | -0.5433651 |

Energy (0K) = -1837.549305

Energy (0K) + ZPE = -1837.040942

Enthalpy (298K) = -1837.010864

Free Energy (298K) = -1837.100978

## **2a\_cis\_2**

Number of imaginary frequencies: 0

|   |            |            |            |
|---|------------|------------|------------|
| S | 2.2516417  | -1.9449795 | -1.8957265 |
| O | -0.2927143 | -0.6513375 | -2.1140565 |
| O | 1.9854277  | -2.1788105 | -3.2996935 |
| O | 3.2890517  | -2.7021805 | -1.2108355 |
| N | 0.8305067  | -2.2495535 | -0.9579555 |
| C | -0.2684143 | -1.4249495 | -1.1777445 |
| C | -1.3384683 | -1.4886495 | -0.1001575 |

|   |            |            |            |
|---|------------|------------|------------|
| H | -1.3584723 | -2.5037785 | 0.2847315  |
| C | -0.9654703 | -0.5456475 | 1.1215185  |
| H | -1.6829843 | -0.8532955 | 1.8940795  |
| C | 0.4323597  | -0.6968605 | 1.7613795  |
| C | 1.0002297  | 0.4354175  | 2.3606575  |
| H | 0.4787507  | 1.3821885  | 2.3029975  |
| C | 2.2174637  | 0.3951335  | 3.0288265  |
| H | 2.6116807  | 1.3011565  | 3.4782845  |
| C | 2.9198687  | -0.7986535 | 3.1125925  |
| H | 3.8783167  | -0.8498215 | 3.6185535  |
| C | 2.3625767  | -1.9392605 | 2.5510235  |
| H | 2.8913037  | -2.8853235 | 2.6250995  |
| C | 1.1265617  | -1.9171035 | 1.8988935  |
| C | 0.5998577  | -3.2342445 | 1.3878025  |
| H | -0.4534353 | -3.3480745 | 1.6569865  |
| H | 1.1173567  | -4.0471645 | 1.9052305  |
| C | 0.8137377  | -3.4586245 | -0.1265555 |
| H | 1.7899047  | -3.9192385 | -0.2714185 |
| H | 0.0627707  | -4.1512905 | -0.5199685 |
| C | -2.7579233 | -1.2238755 | -0.5717555 |
| C | -3.1081953 | -0.2443995 | -1.5049365 |
| H | -2.3323593 | 0.3445285  | -1.9751495 |
| C | -4.4442263 | -0.0279305 | -1.8245885 |
| H | -4.6989983 | 0.7349215  | -2.5533485 |
| C | -5.4506813 | -0.7705115 | -1.2147235 |
| H | -6.4917263 | -0.5918225 | -1.4647025 |
| C | -5.1130093 | -1.7439165 | -0.2806595 |
| H | -5.8865563 | -2.3331235 | 0.2017555  |
| C | -3.7762293 | -1.9668595 | 0.0313195  |
| H | -3.5193783 | -2.7309215 | 0.7623055  |
| C | -1.2953863 | 0.8977475  | 0.7729605  |
| C | -0.4845983 | 1.6456505  | -0.0865455 |
| H | 0.4262247  | 1.2153995  | -0.4839625 |
| C | -0.8321003 | 2.9439675  | -0.4366375 |
| H | -0.1900273 | 3.5024405  | -1.1113805 |
| C | -1.9954023 | 3.5202725  | 0.0690745  |
| H | -2.2664233 | 4.5351345  | -0.2046665 |
| C | -2.8050263 | 2.7872955  | 0.9292645  |
| H | -3.7141043 | 3.2247735  | 1.3293335  |
| C | -2.4539053 | 1.4858925  | 1.2770545  |
| H | -3.1021983 | 0.9104045  | 1.9320355  |
| C | 2.5426337  | -0.2175855 | -1.6169345 |
| C | 2.2188867  | 0.7021475  | -2.6068975 |
| H | 1.7863357  | 0.3570525  | -3.5375925 |
| C | 2.4290837  | 2.0525645  | -2.3582275 |
| H | 2.1714247  | 2.7802745  | -3.1218235 |

|   |           |            |            |
|---|-----------|------------|------------|
| C | 2.9458517 | 2.4889985  | -1.1353405 |
| C | 3.2785027 | 1.5360285  | -0.1679675 |
| H | 3.6819897 | 1.8557805  | 0.7879065  |
| C | 3.0830737 | 0.1822775  | -0.3989905 |
| H | 3.3322437 | -0.5507265 | 0.3600425  |
| C | 3.1041767 | 3.9571025  | -0.8407785 |
| H | 4.0520717 | 4.1606595  | -0.3351755 |
| H | 2.2992157 | 4.2993785  | -0.1809385 |
| H | 3.0673297 | 4.5559285  | -1.7538755 |

Energy (0K) = -1837.594085

Energy (0K) + ZPE = -1837.083842

Enthalpy (298K) = -1837.054466

Free Energy (298K) = -1837.141507

## 2a\_trans\_2

Number of imaginary frequencies: 0

|   |            |            |            |
|---|------------|------------|------------|
| S | 1.7476191  | -2.7979195 | -0.4207110 |
| O | -1.1804989 | -2.8341115 | 1.8064970  |
| O | 0.7499621  | -3.2802045 | -1.3606260 |
| O | 2.8794251  | -3.5998305 | 0.0056660  |
| N | 0.8948671  | -2.4411535 | 0.9760760  |
| C | -0.5121689 | -2.2796755 | 0.9674630  |
| C | -1.0500369 | -1.1530465 | 0.1085950  |
| H | -0.3794929 | -0.9712495 | -0.7313020 |
| C | -0.9836469 | 0.1095535  | 1.0563340  |
| H | -1.3884219 | -0.2160005 | 2.0209730  |
| C | 0.4469661  | 0.6322345  | 1.3197870  |
| C | 0.8900321  | 1.7541565  | 0.6096380  |
| H | 0.2464931  | 2.1898815  | -0.1444970 |
| C | 2.1122961  | 2.3603135  | 0.8643730  |
| H | 2.4029241  | 3.2399075  | 0.2983450  |
| C | 2.9412511  | 1.8500485  | 1.8530350  |
| H | 3.8927251  | 2.3207365  | 2.0793310  |
| C | 2.5380251  | 0.7175245  | 2.5445370  |
| H | 3.1876561  | 0.3008235  | 3.3104830  |
| C | 1.3124051  | 0.0896865  | 2.2974610  |
| C | 1.0396151  | -1.1831535 | 3.0708990  |
| H | -0.0199979 | -1.2994325 | 3.3120870  |
| H | 1.5709251  | -1.1549105 | 4.0267790  |
| C | 1.5158891  | -2.4300175 | 2.3033350  |
| H | 2.5973211  | -2.4049395 | 2.1607860  |
| H | 1.2634151  | -3.3446985 | 2.8454410  |
| C | -2.4257569 | -1.4864475 | -0.4253200 |
| C | -2.5633729 | -1.8190825 | -1.7721140 |
| H | -1.6816039 | -1.8462665 | -2.4070150 |
| C | -3.8105819 | -2.1300495 | -2.3042300 |

|   |            |            |            |
|---|------------|------------|------------|
| H | -3.9015139 | -2.3826505 | -3.3558910 |
| C | -4.9365089 | -2.1165265 | -1.4879200 |
| H | -5.9122119 | -2.3522805 | -1.9007100 |
| C | -4.8043669 | -1.8019405 | -0.1380300 |
| H | -5.6771899 | -1.7967355 | 0.5071870  |
| C | -3.5574439 | -1.4924525 | 0.3910390  |
| H | -3.4643569 | -1.2534215 | 1.4445210  |
| C | -1.9010729 | 1.2239875  | 0.5770360  |
| C | -2.0562809 | 1.5408075  | -0.7745640 |
| H | -1.5298429 | 0.9643855  | -1.5292290 |
| C | -2.8890389 | 2.5806755  | -1.1709050 |
| H | -3.0043599 | 2.8035235  | -2.2268500 |
| C | -3.5819539 | 3.3243035  | -0.2199590 |
| H | -4.2384999 | 4.1310195  | -0.5295620 |
| C | -3.4322519 | 3.0206915  | 1.1288840  |
| H | -3.9695419 | 3.5917585  | 1.8794700  |
| C | -2.5984049 | 1.9779085  | 1.5201590  |
| H | -2.4842999 | 1.7464735  | 2.5759930  |
| C | 2.3976531  | -1.2743745 | -1.0702500 |
| C | 1.7793591  | -0.6749805 | -2.1617540 |
| H | 0.9146961  | -1.1453085 | -2.6165910 |
| C | 2.3046011  | 0.5053835  | -2.6746700 |
| H | 1.8251761  | 0.9754565  | -3.5280960 |
| C | 3.4443141  | 1.0852355  | -2.1173800 |
| C | 4.0600961  | 0.4470315  | -1.0364920 |
| H | 4.9513781  | 0.8833475  | -0.5956100 |
| C | 3.5469141  | -0.7266455 | -0.5081610 |
| H | 4.0384941  | -1.2204555 | 0.3219350  |
| C | 4.0003381  | 2.3802205  | -2.6467740 |
| H | 5.0746231  | 2.3000895  | -2.8361300 |
| H | 3.8564561  | 3.1839595  | -1.9165250 |
| H | 3.5108101  | 2.6788375  | -3.5762800 |

Energy (0K) = -1837.588939

Energy (0K) + ZPE = -1837.079721

Enthalpy (298K) = -1837.050005

Free Energy (298K) = -1837.138962
